# Supplementary material for: Time-Varying Gene Expression Network Analysis Reveals Conserved Transition States in Hematopoietic Differentiation between Human and Mouse
Source: MDPI journal article supplement (doi:10.3390/genes13101890), 2022-10-18

mouse\_HSCtoMEP\_time 1

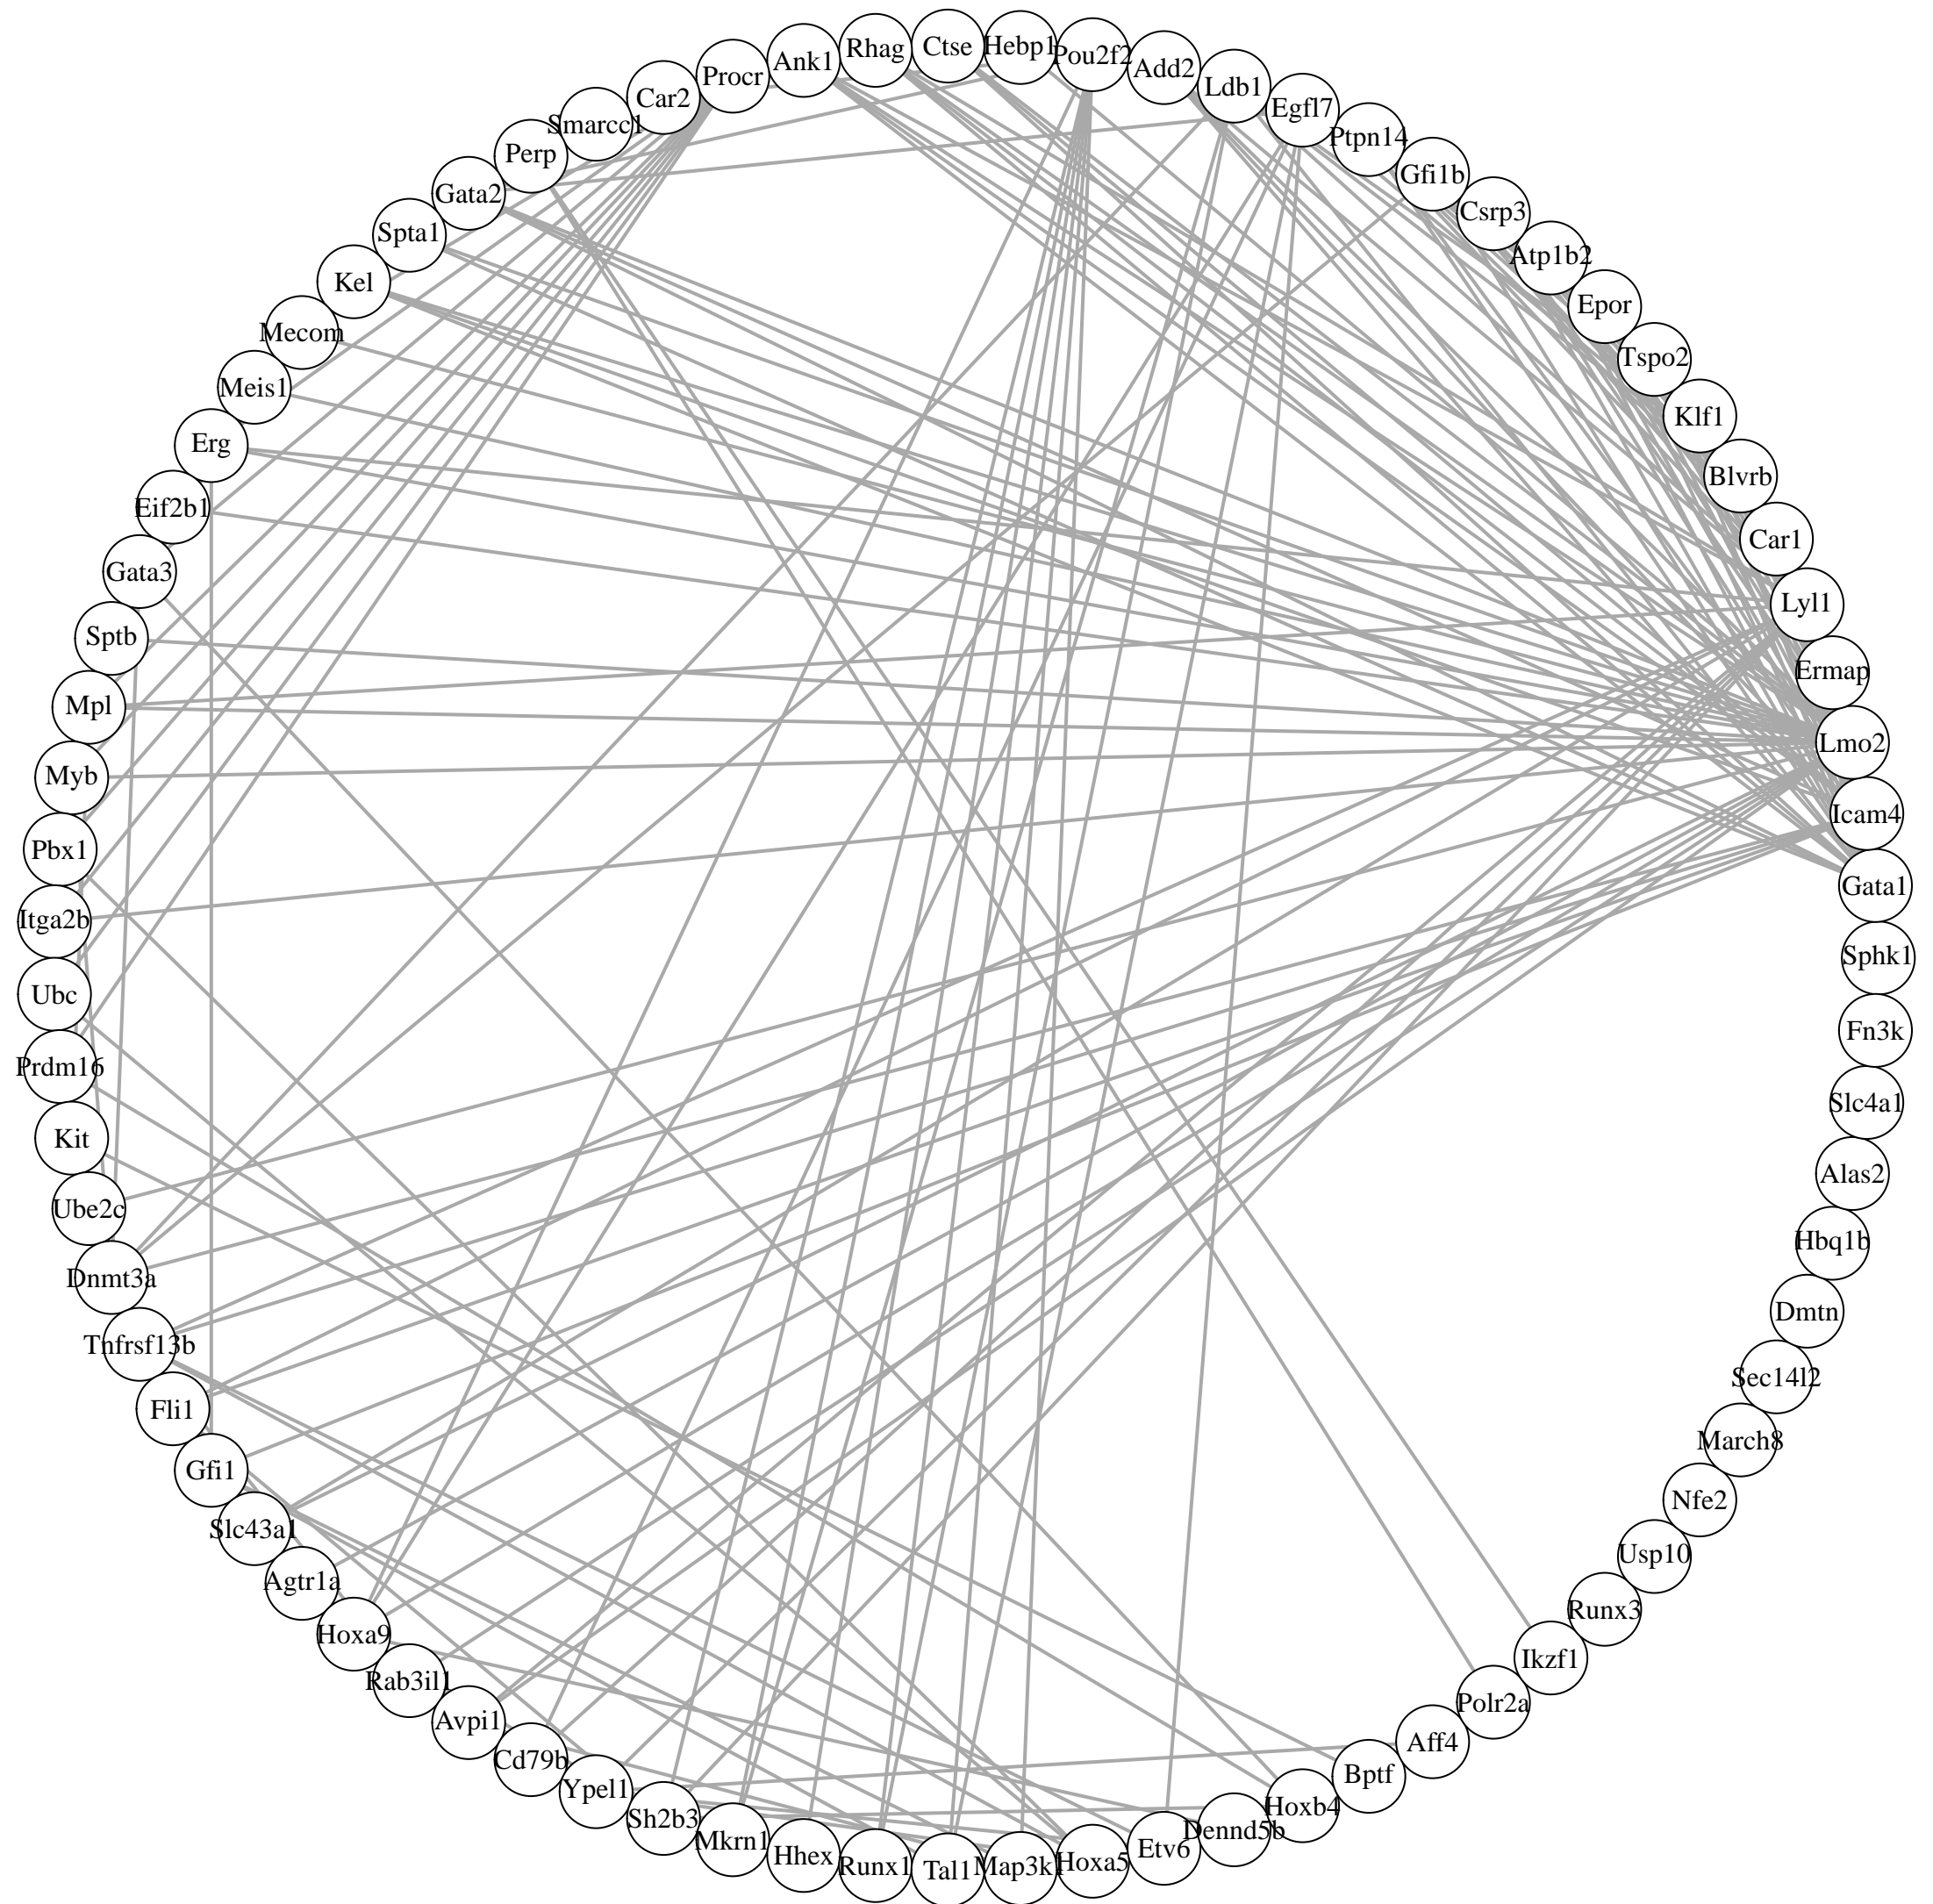

mouse\_HSCtoMEP\_time 2

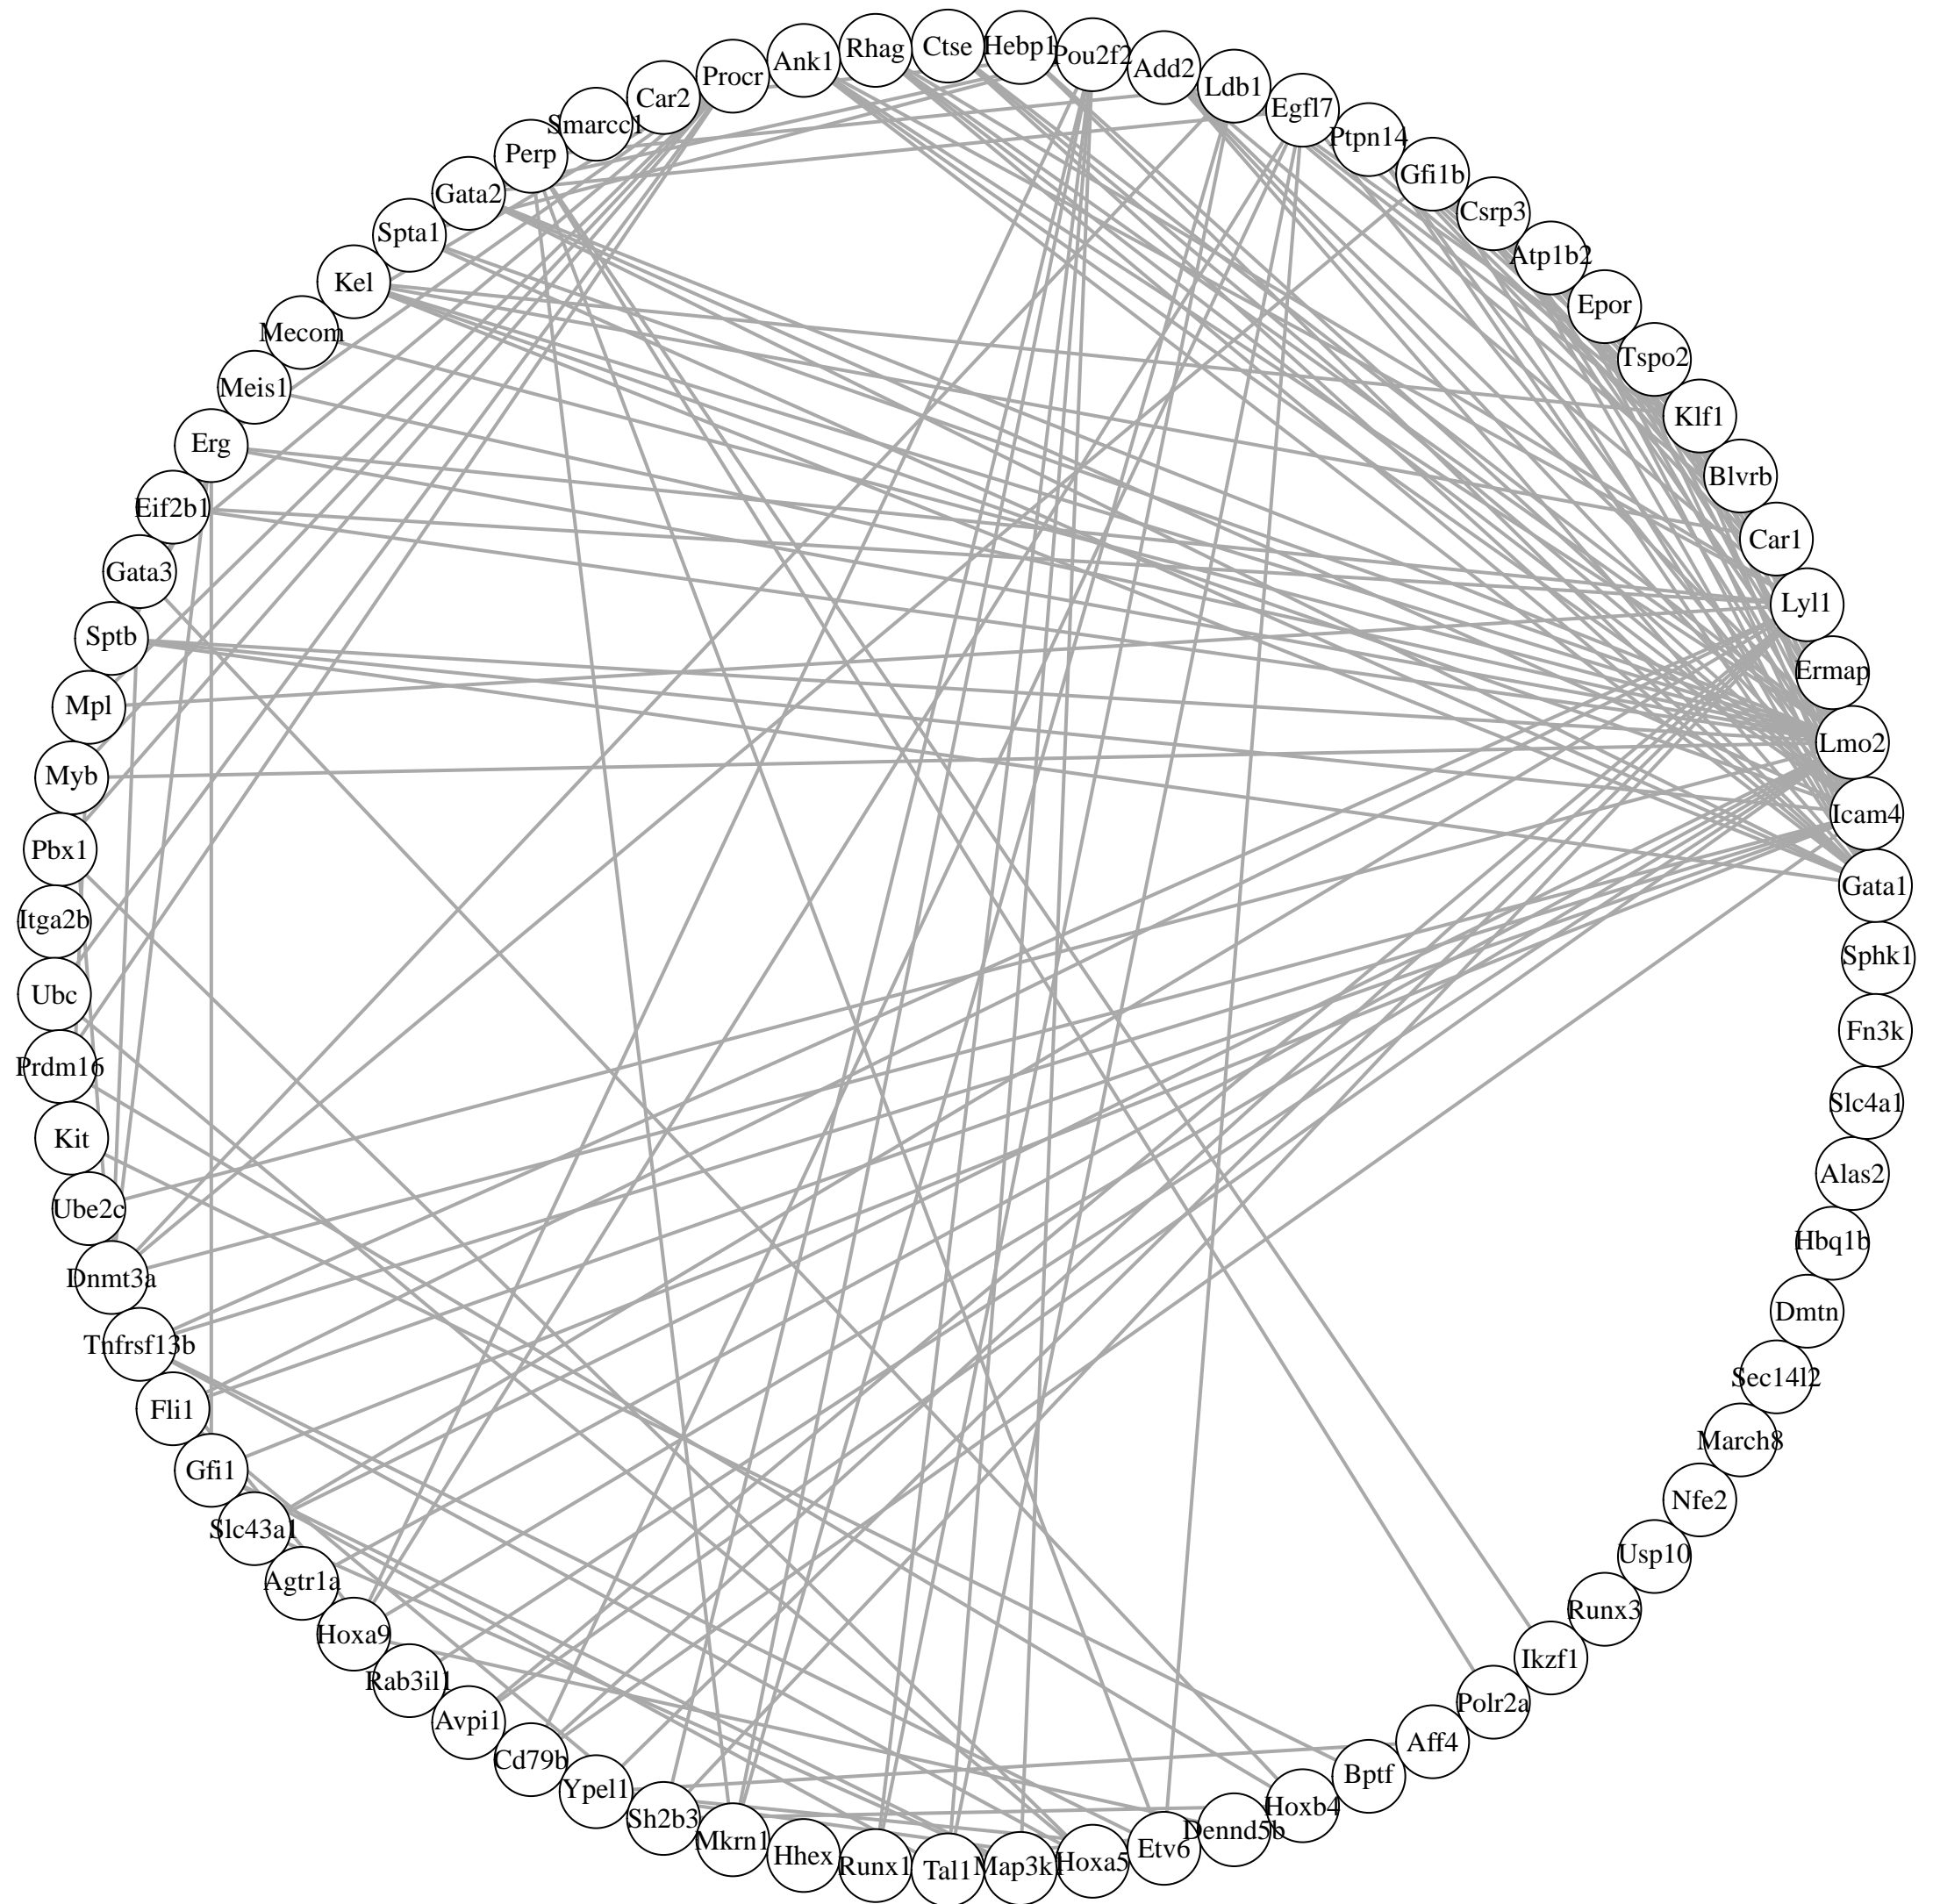

mouse\_HSCtoMEP\_time 3

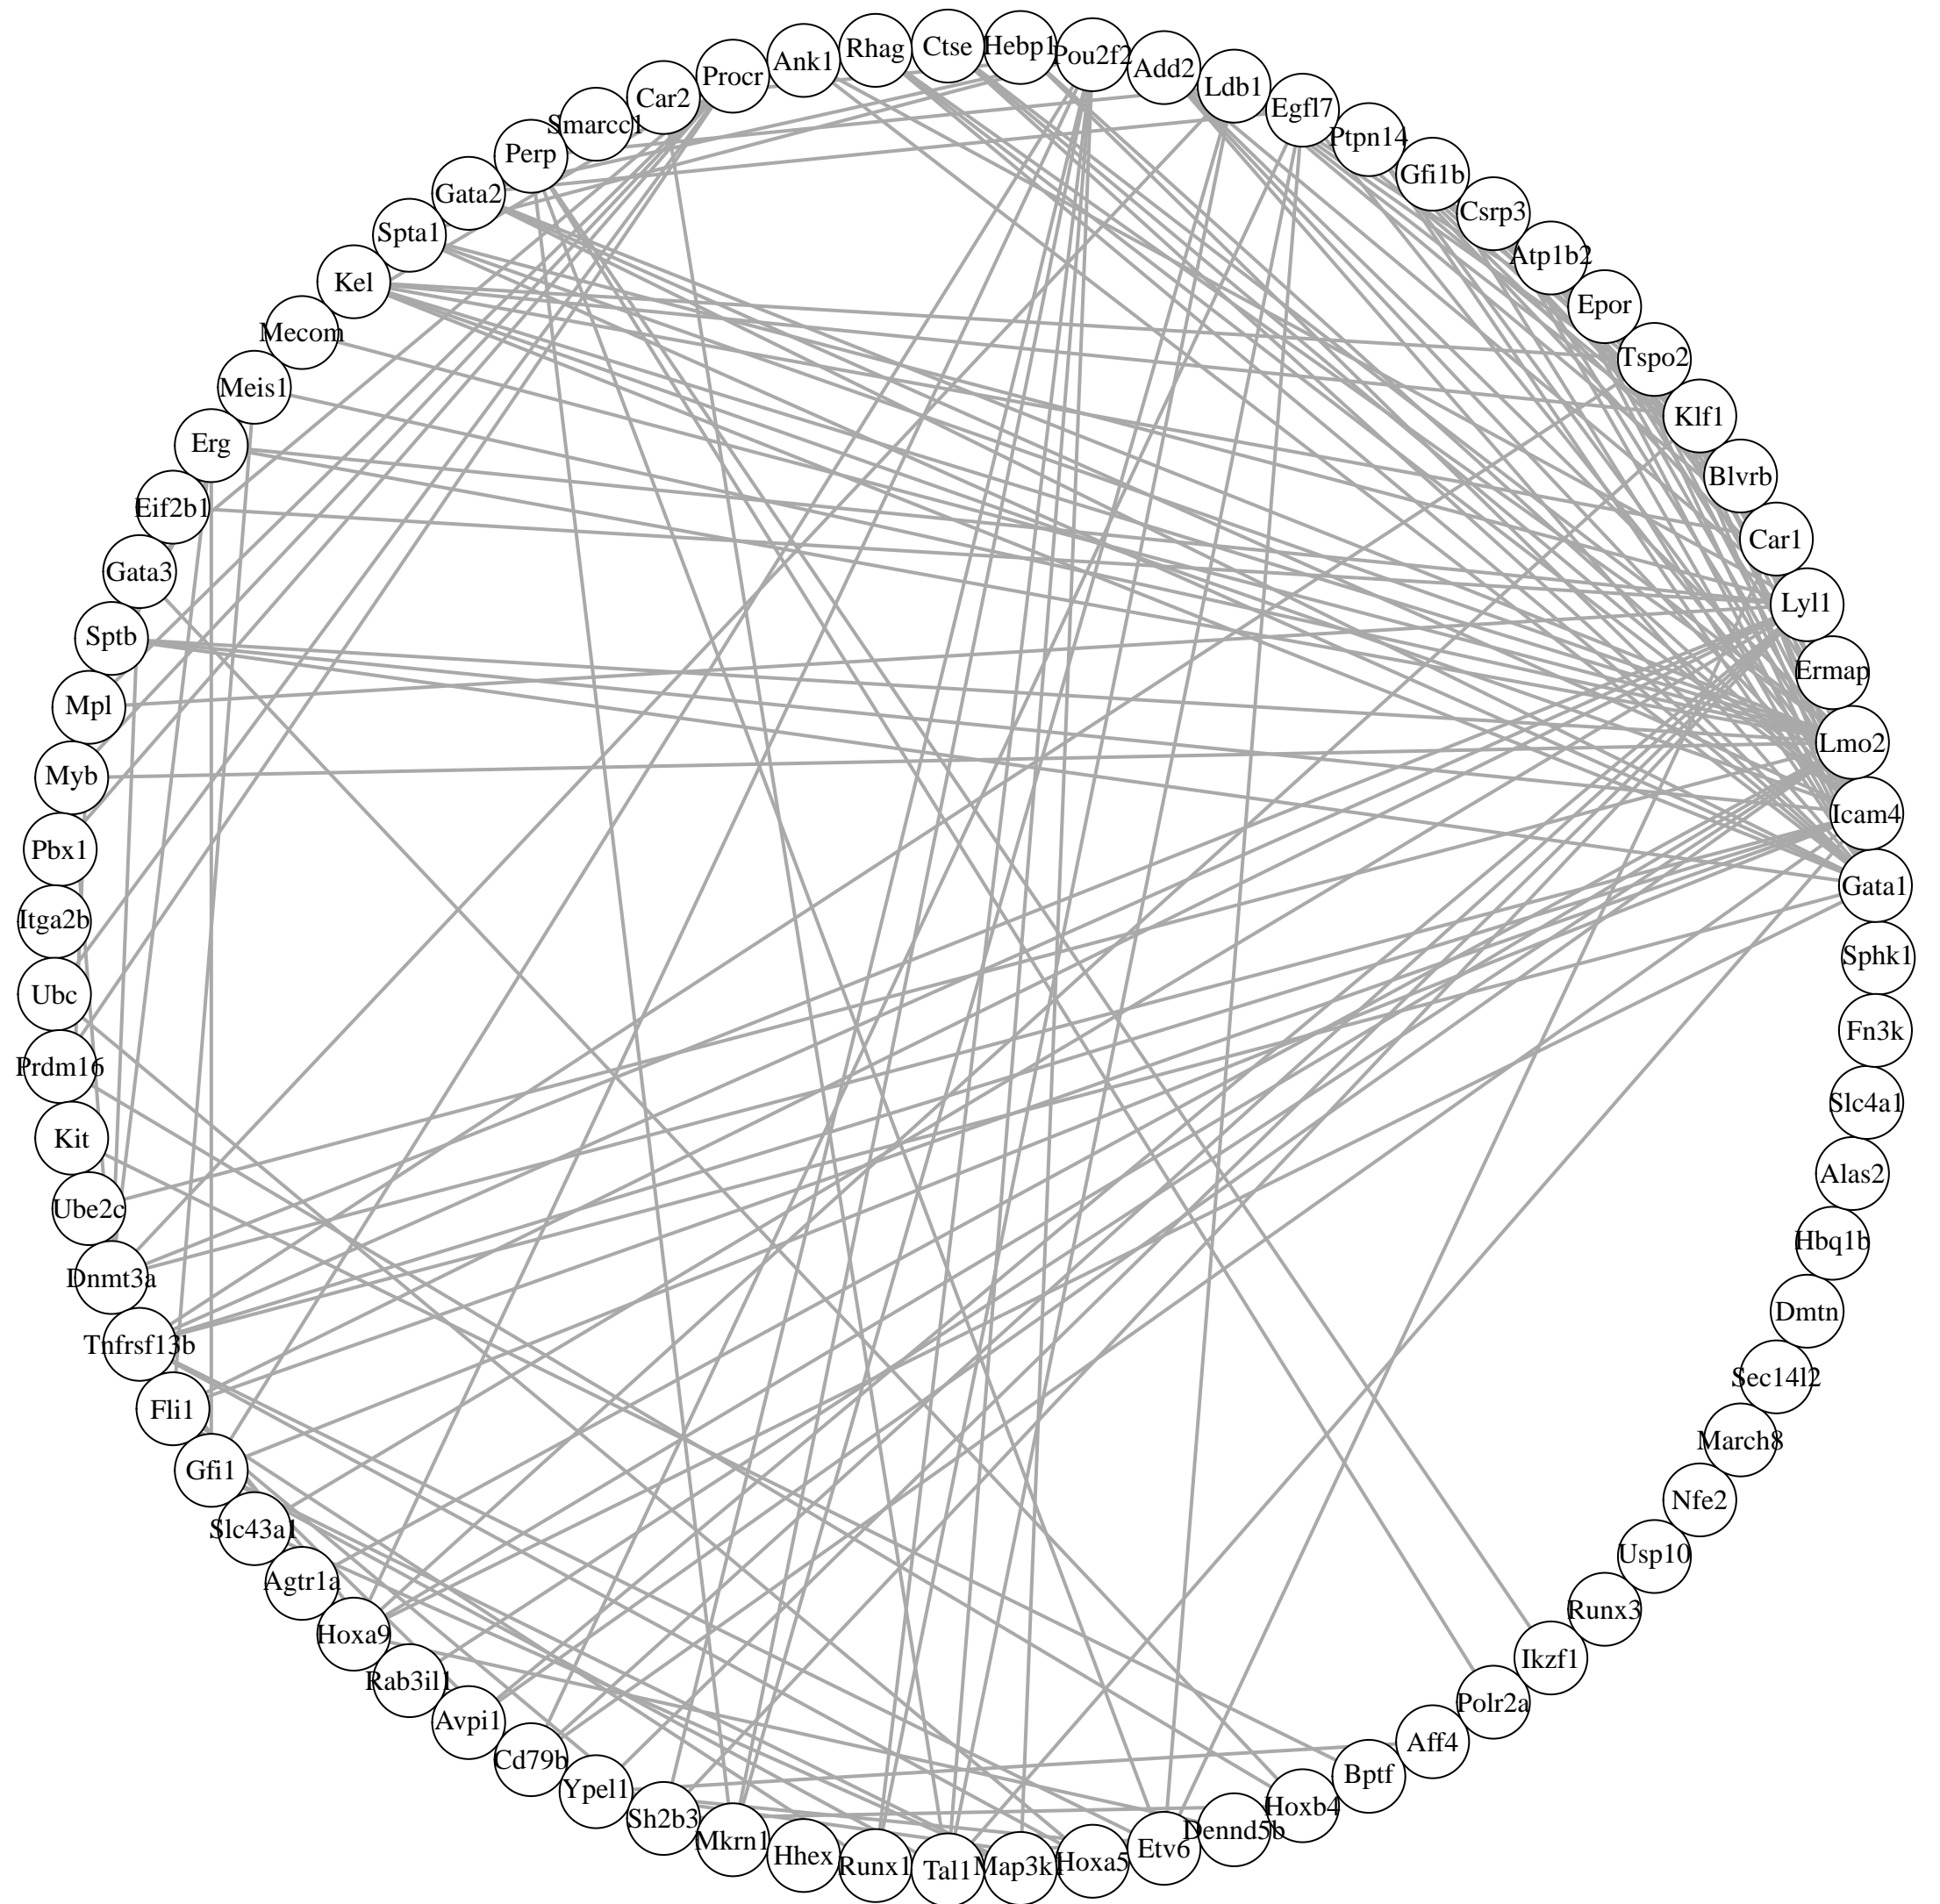

mouse\_HSCtoMEP\_time 4

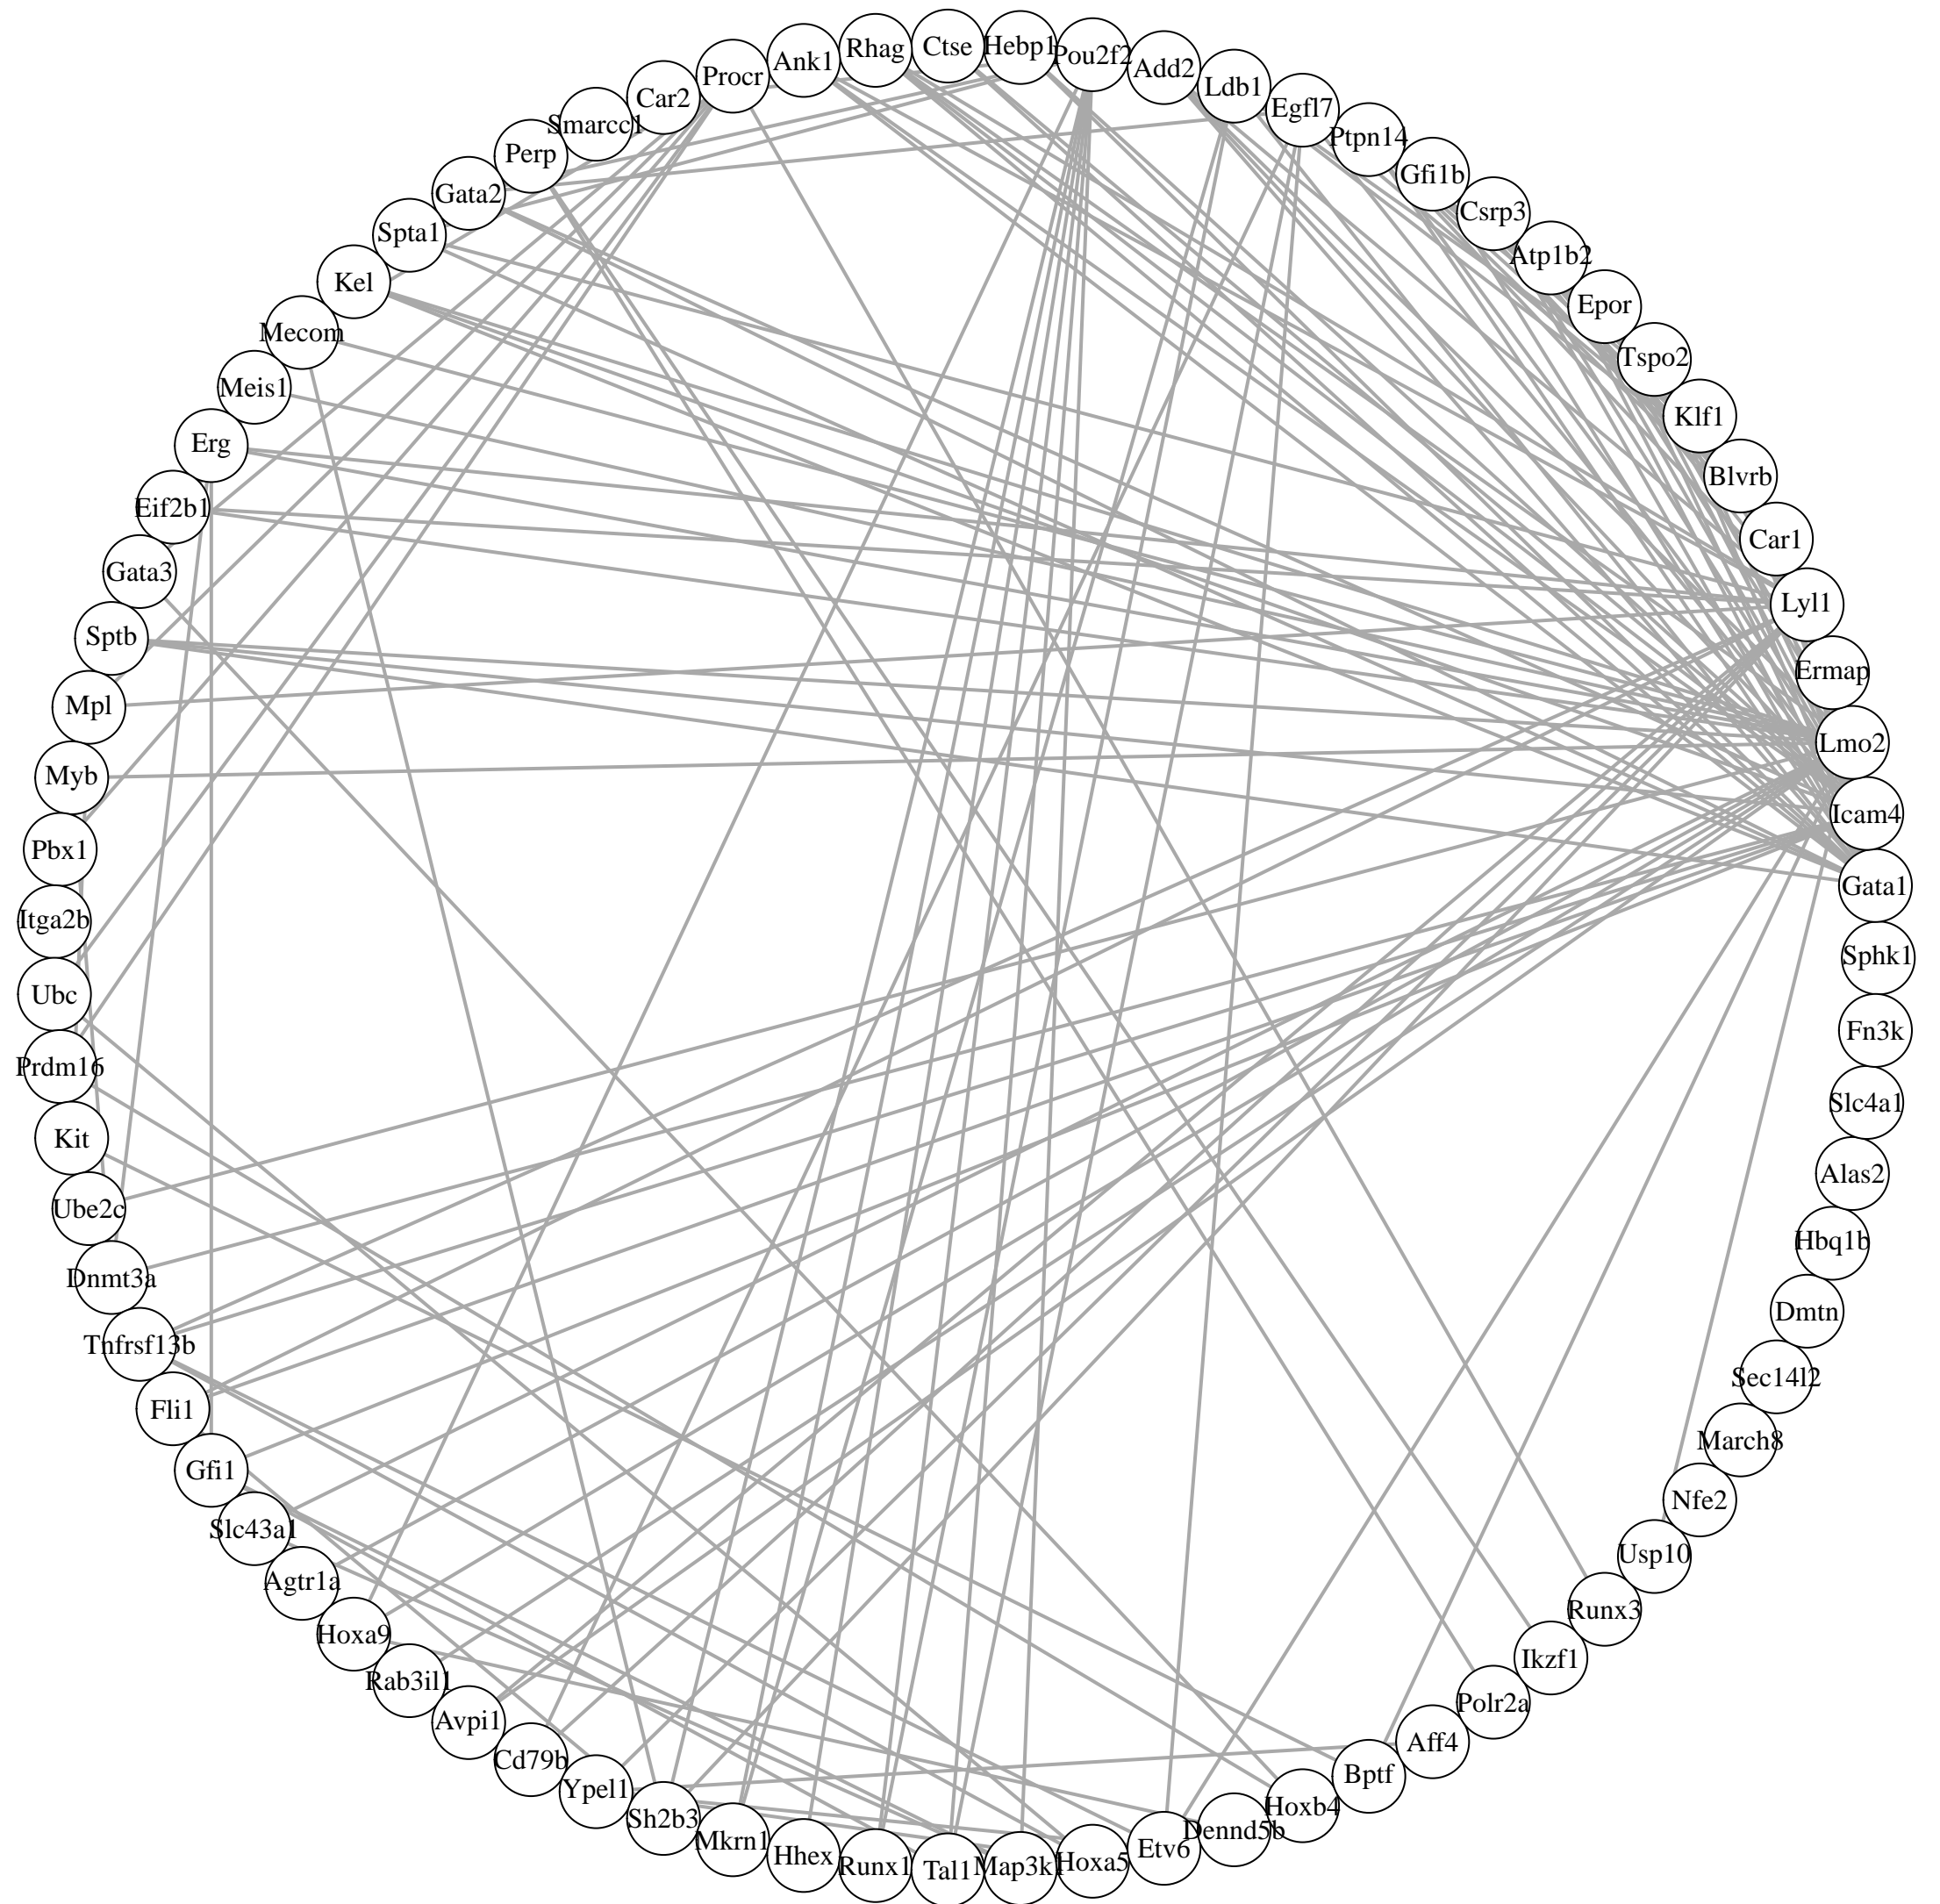

mouse\_HSCtoMEP\_time 5

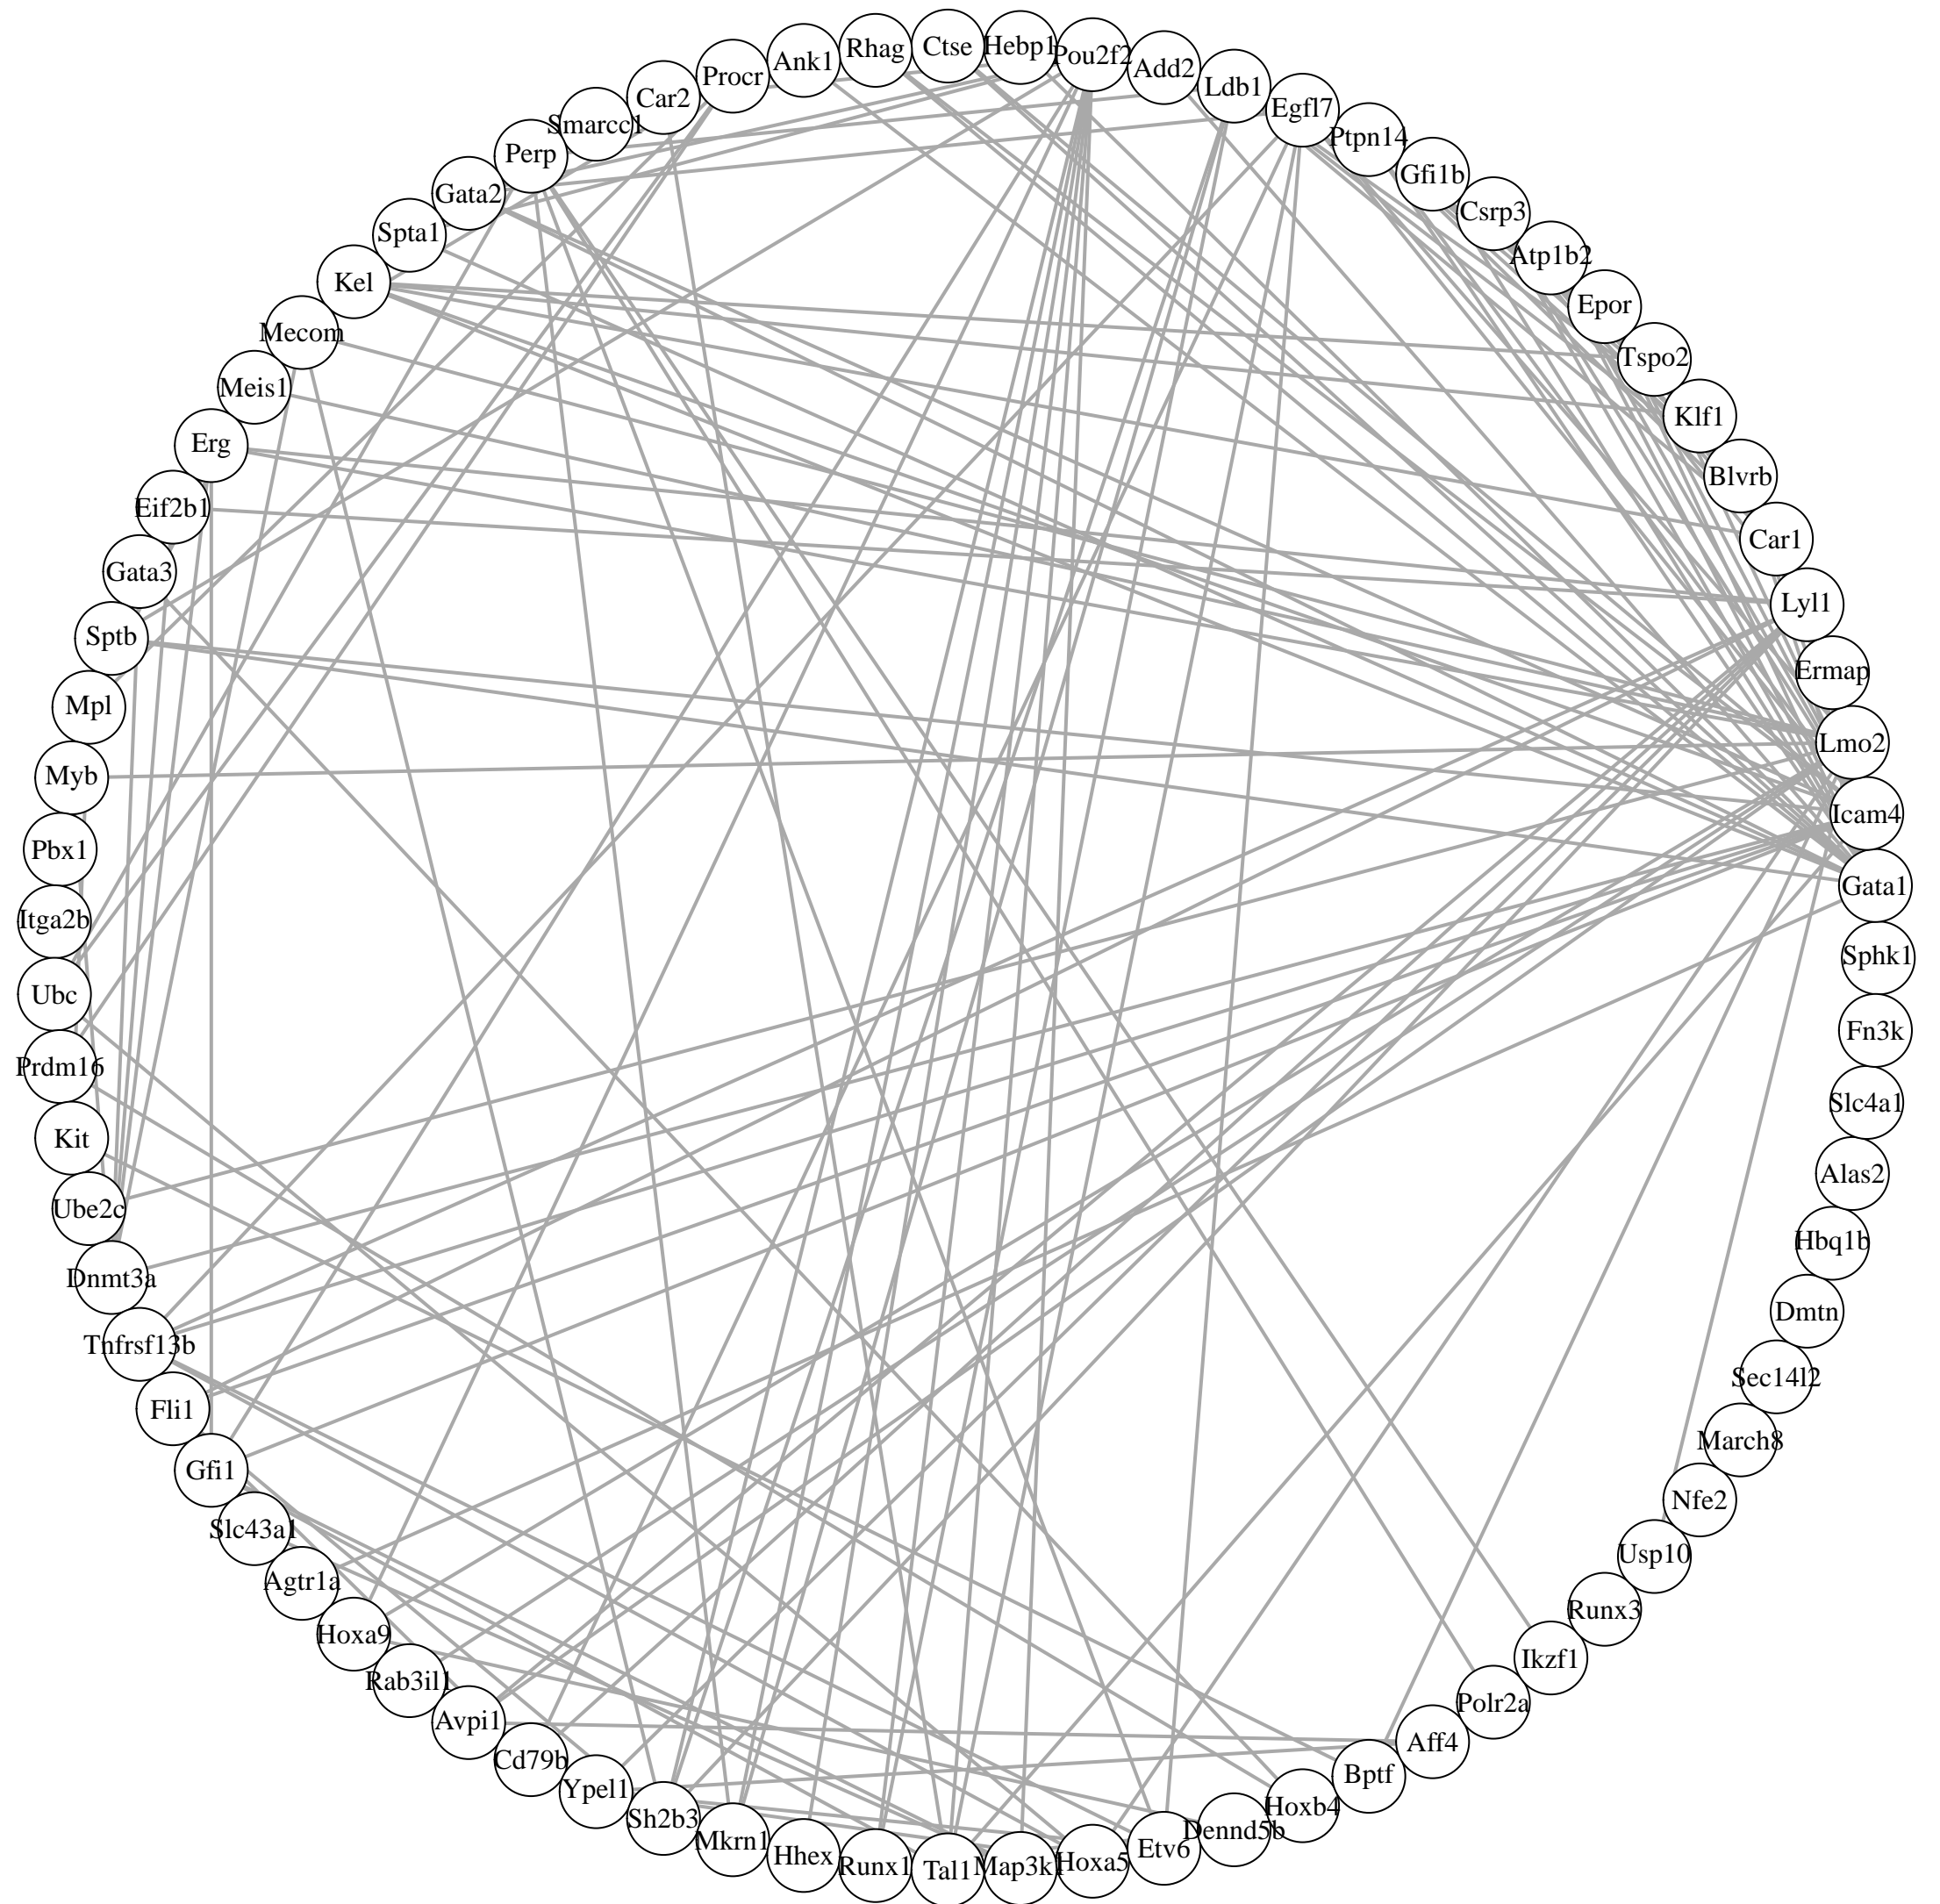



mouse\_HSCtoMEP\_time 6

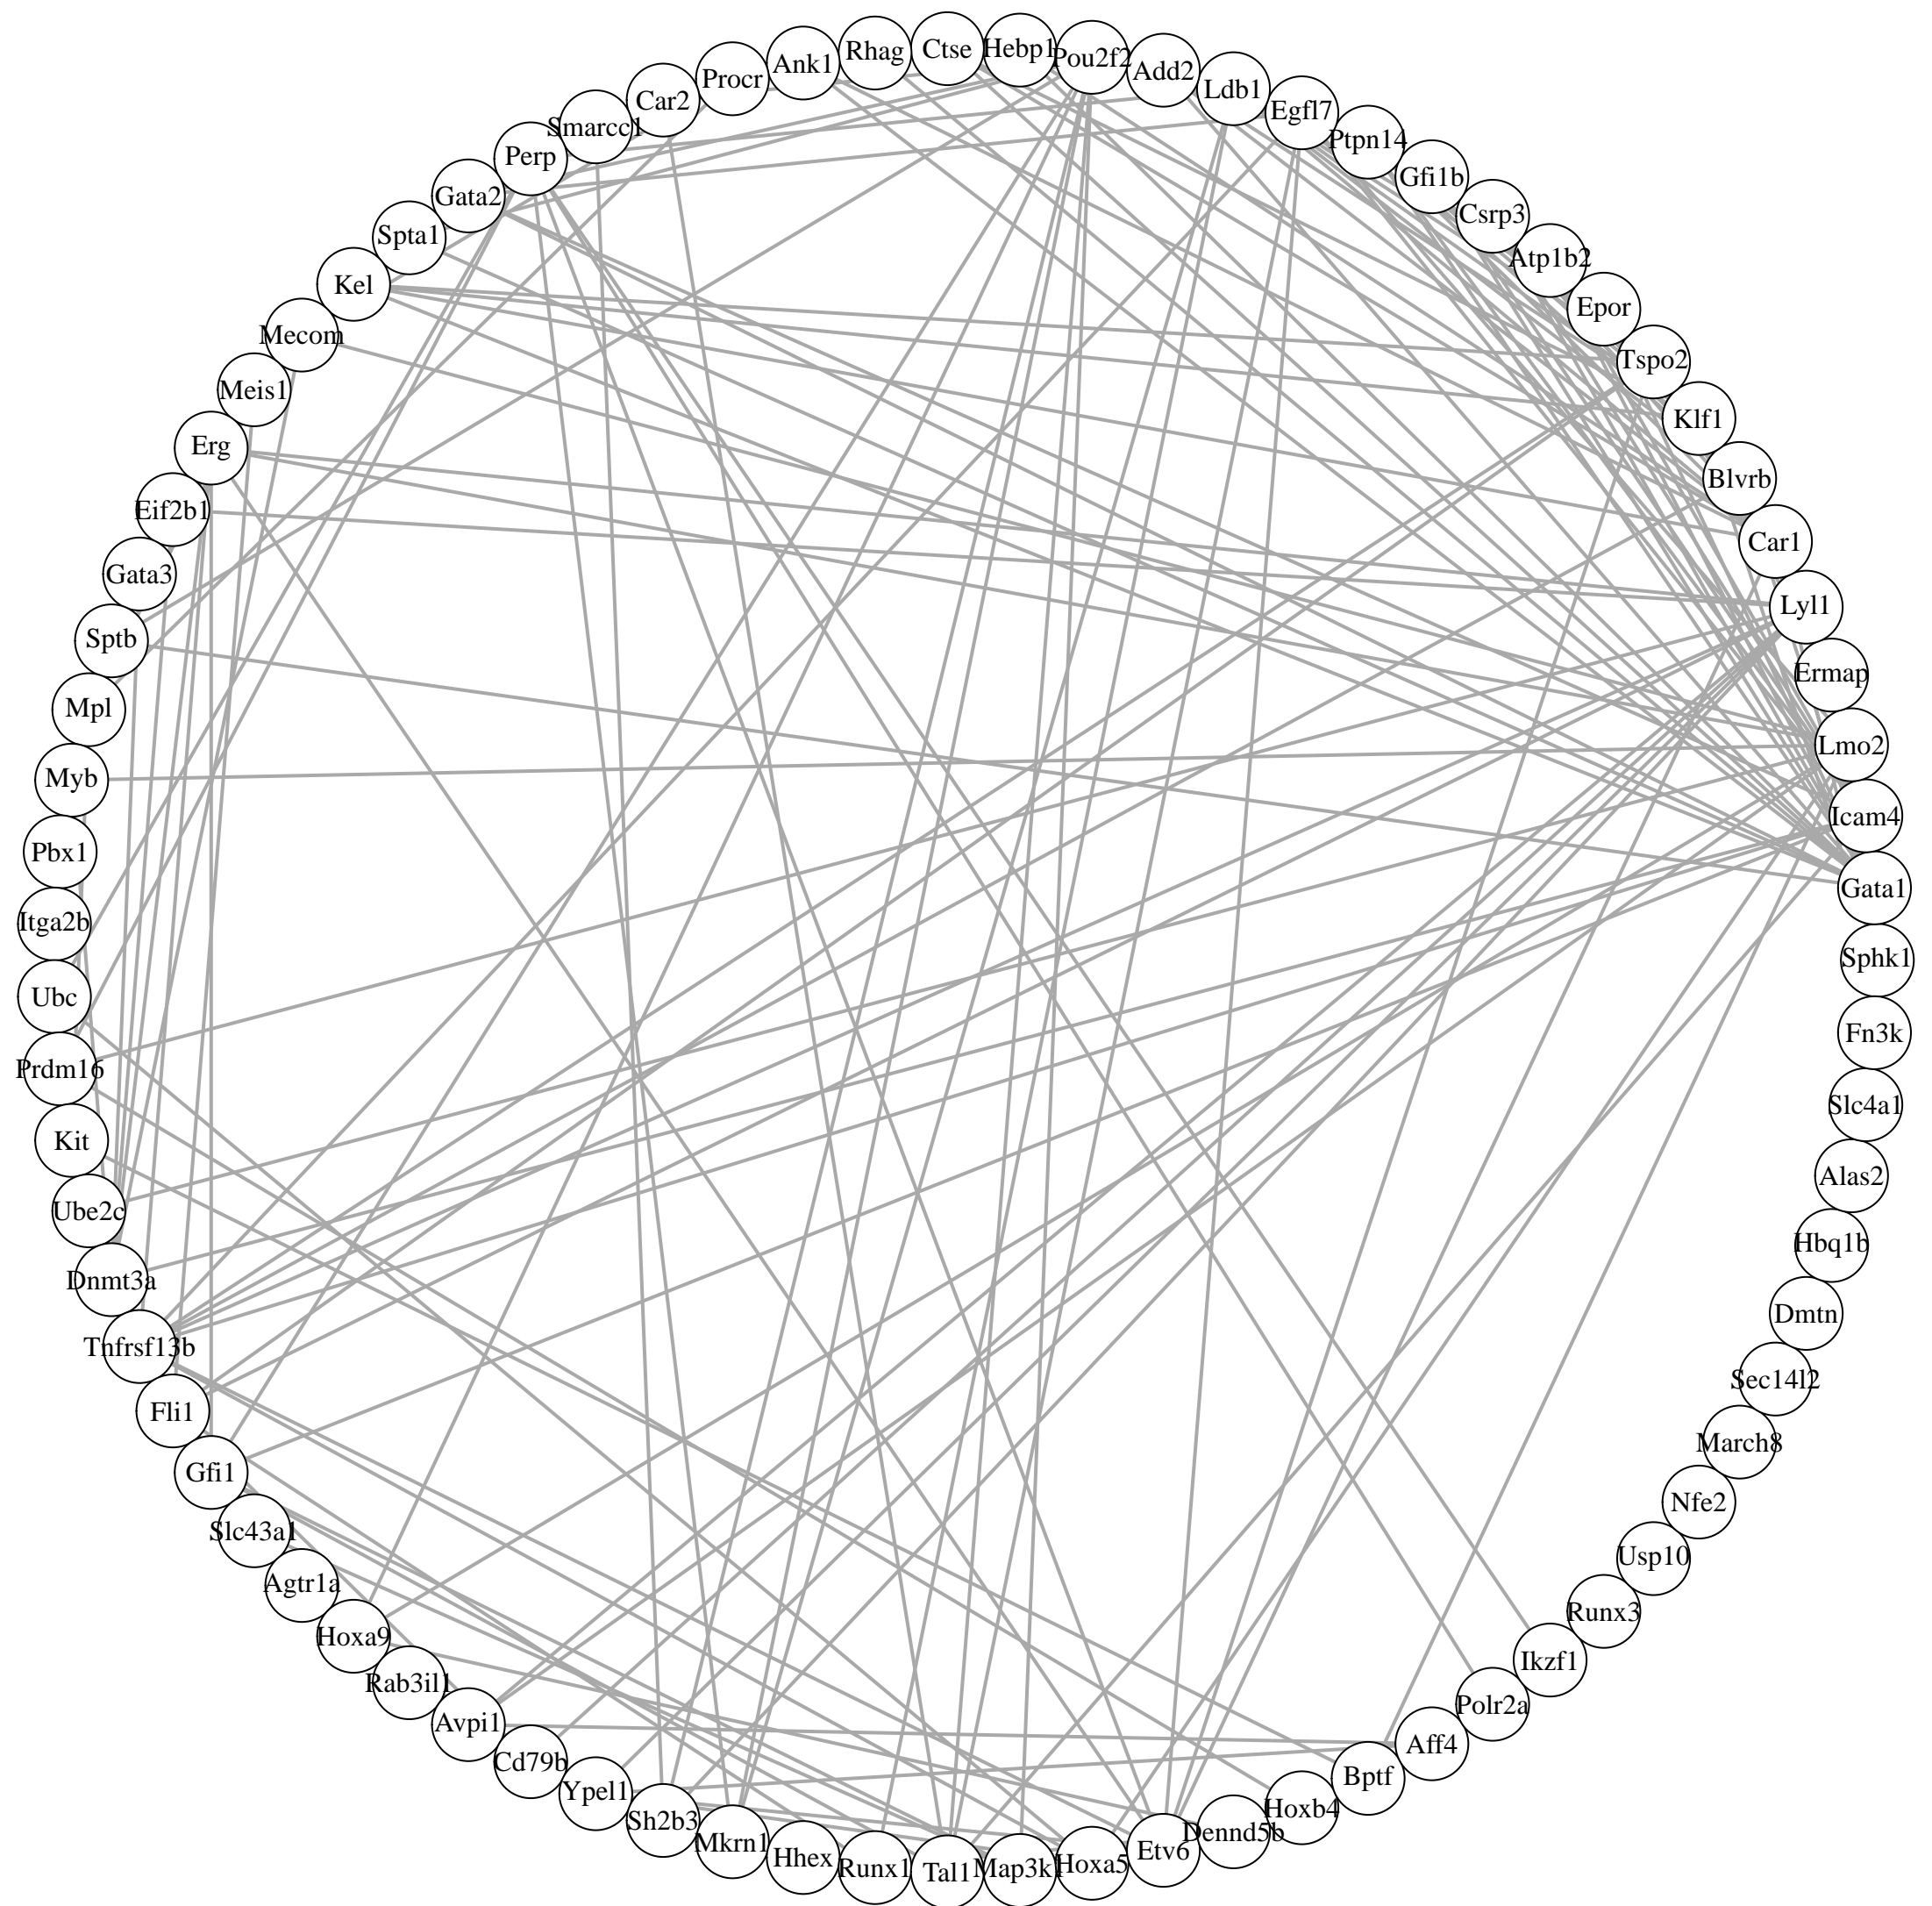

mouse\_HSCtoMEP\_time 7

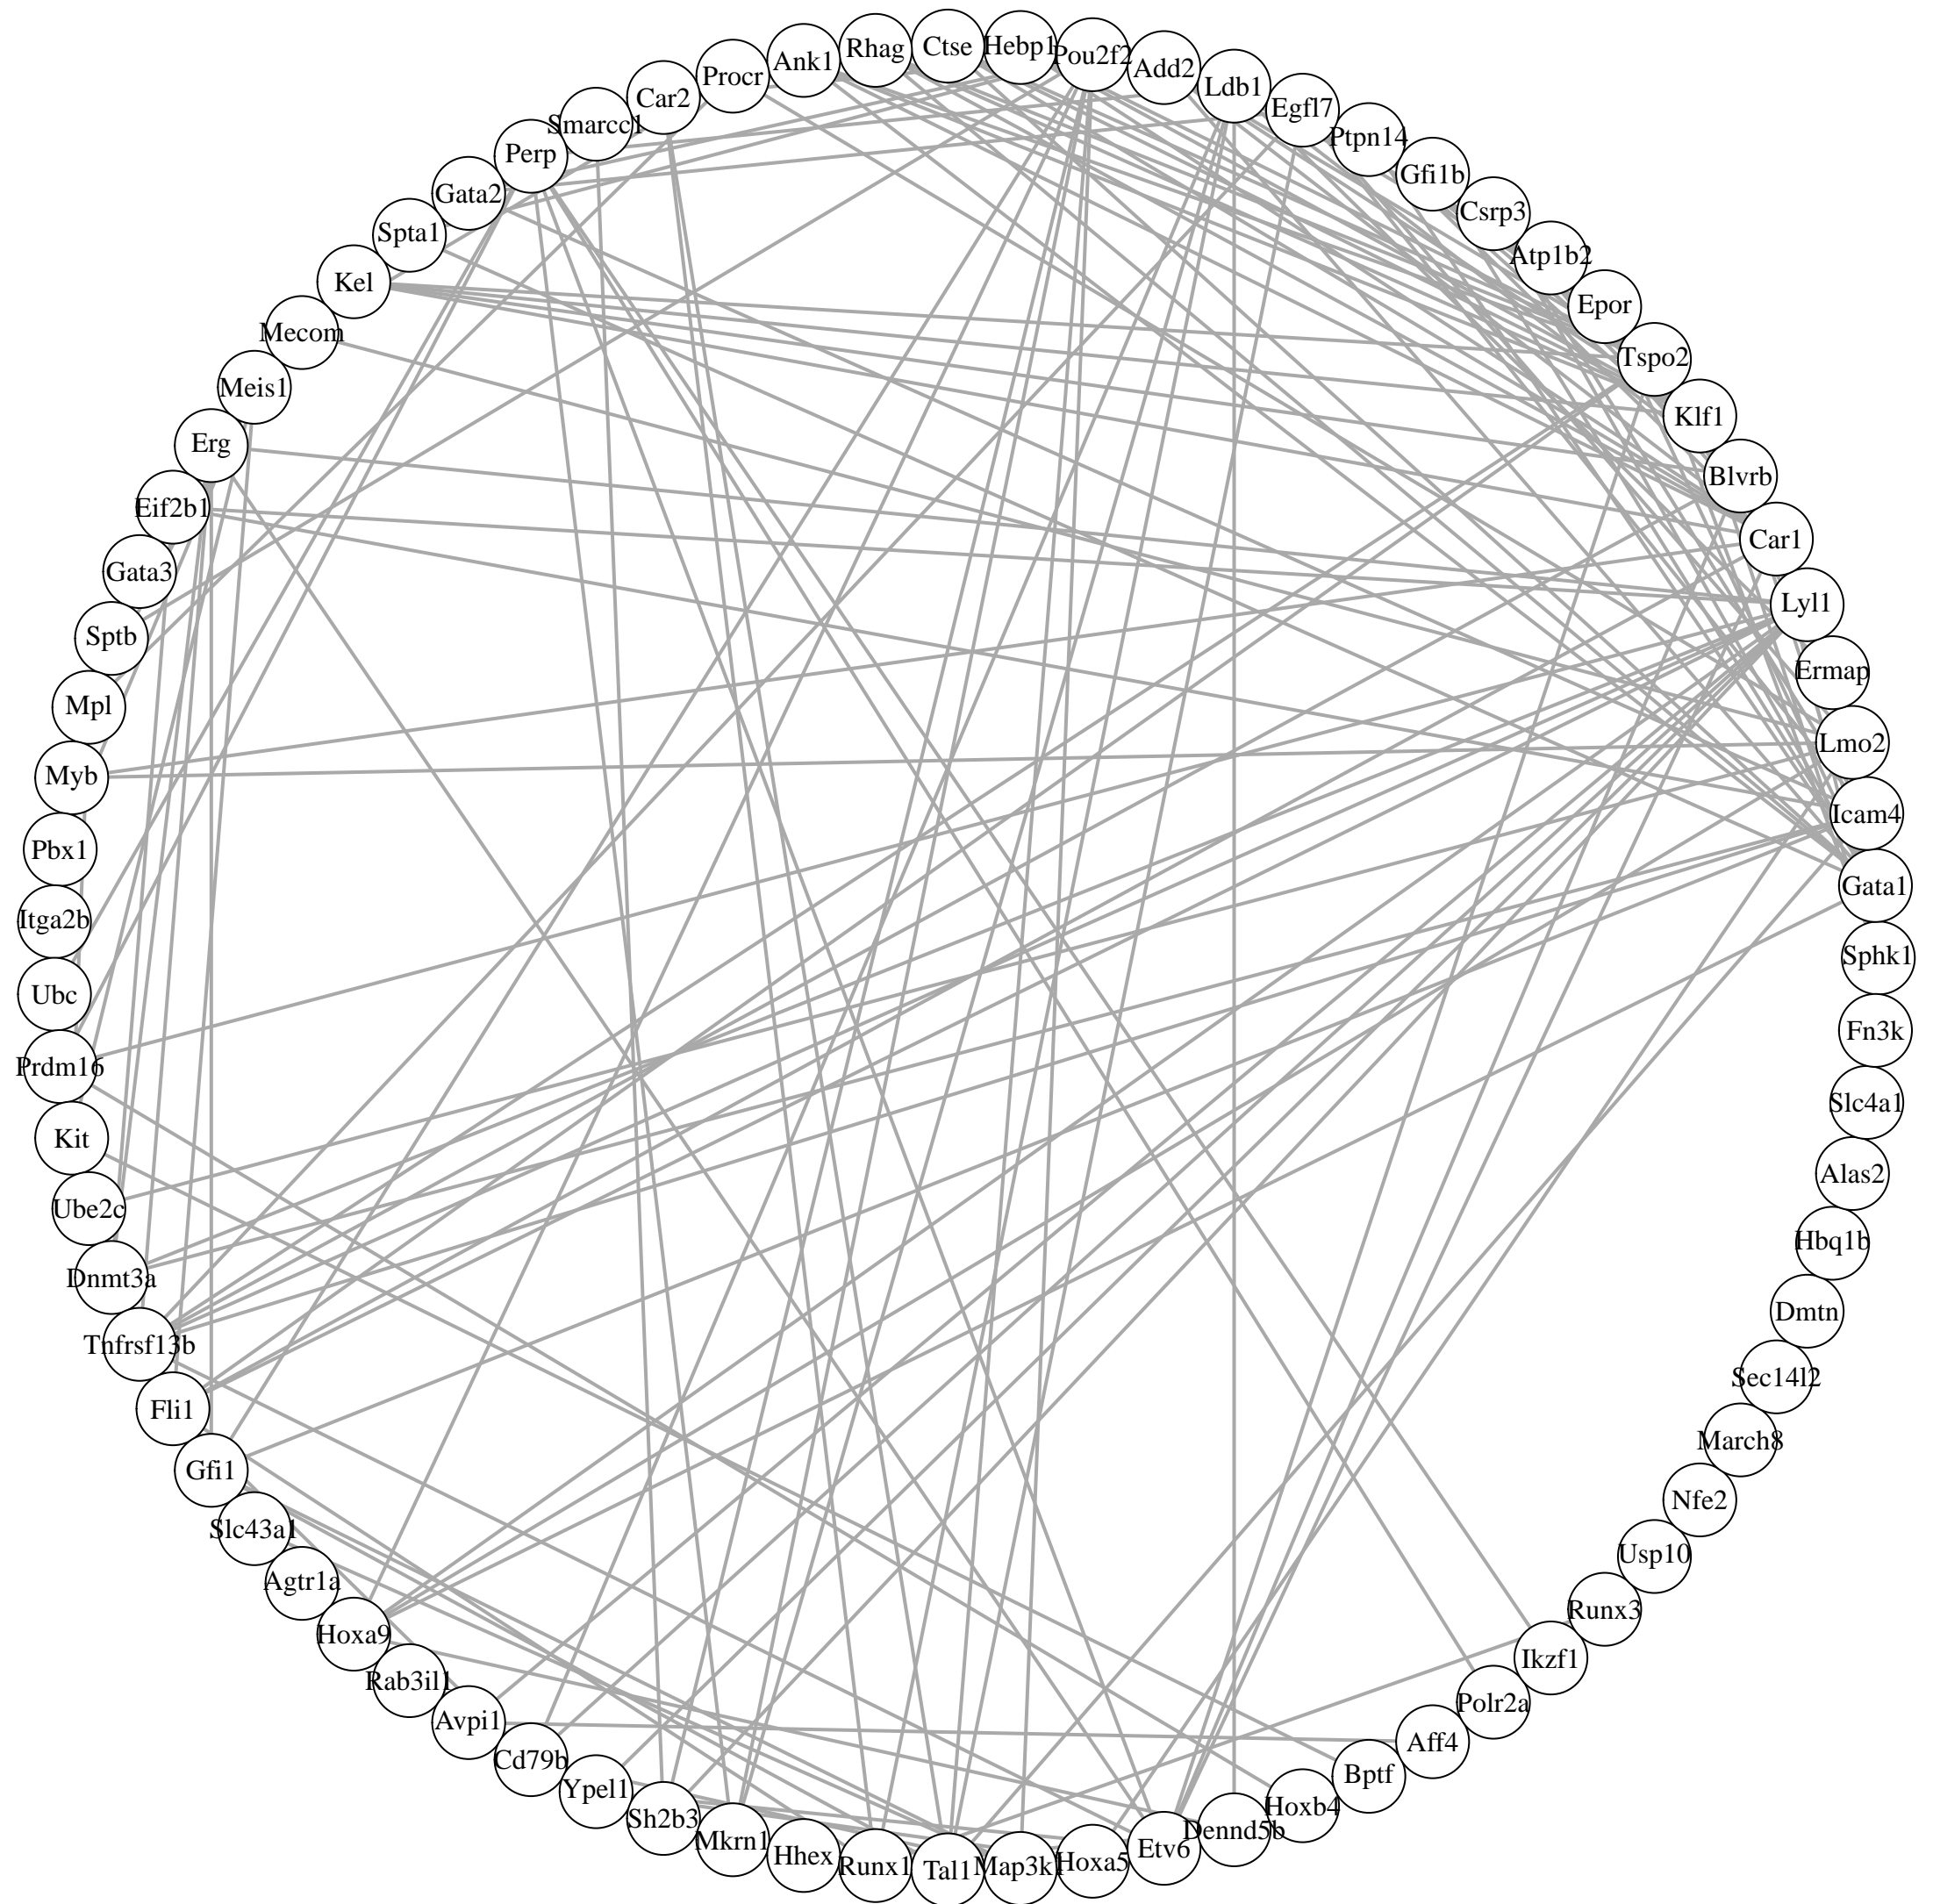

mouse\_HSCtoMEP\_time 8

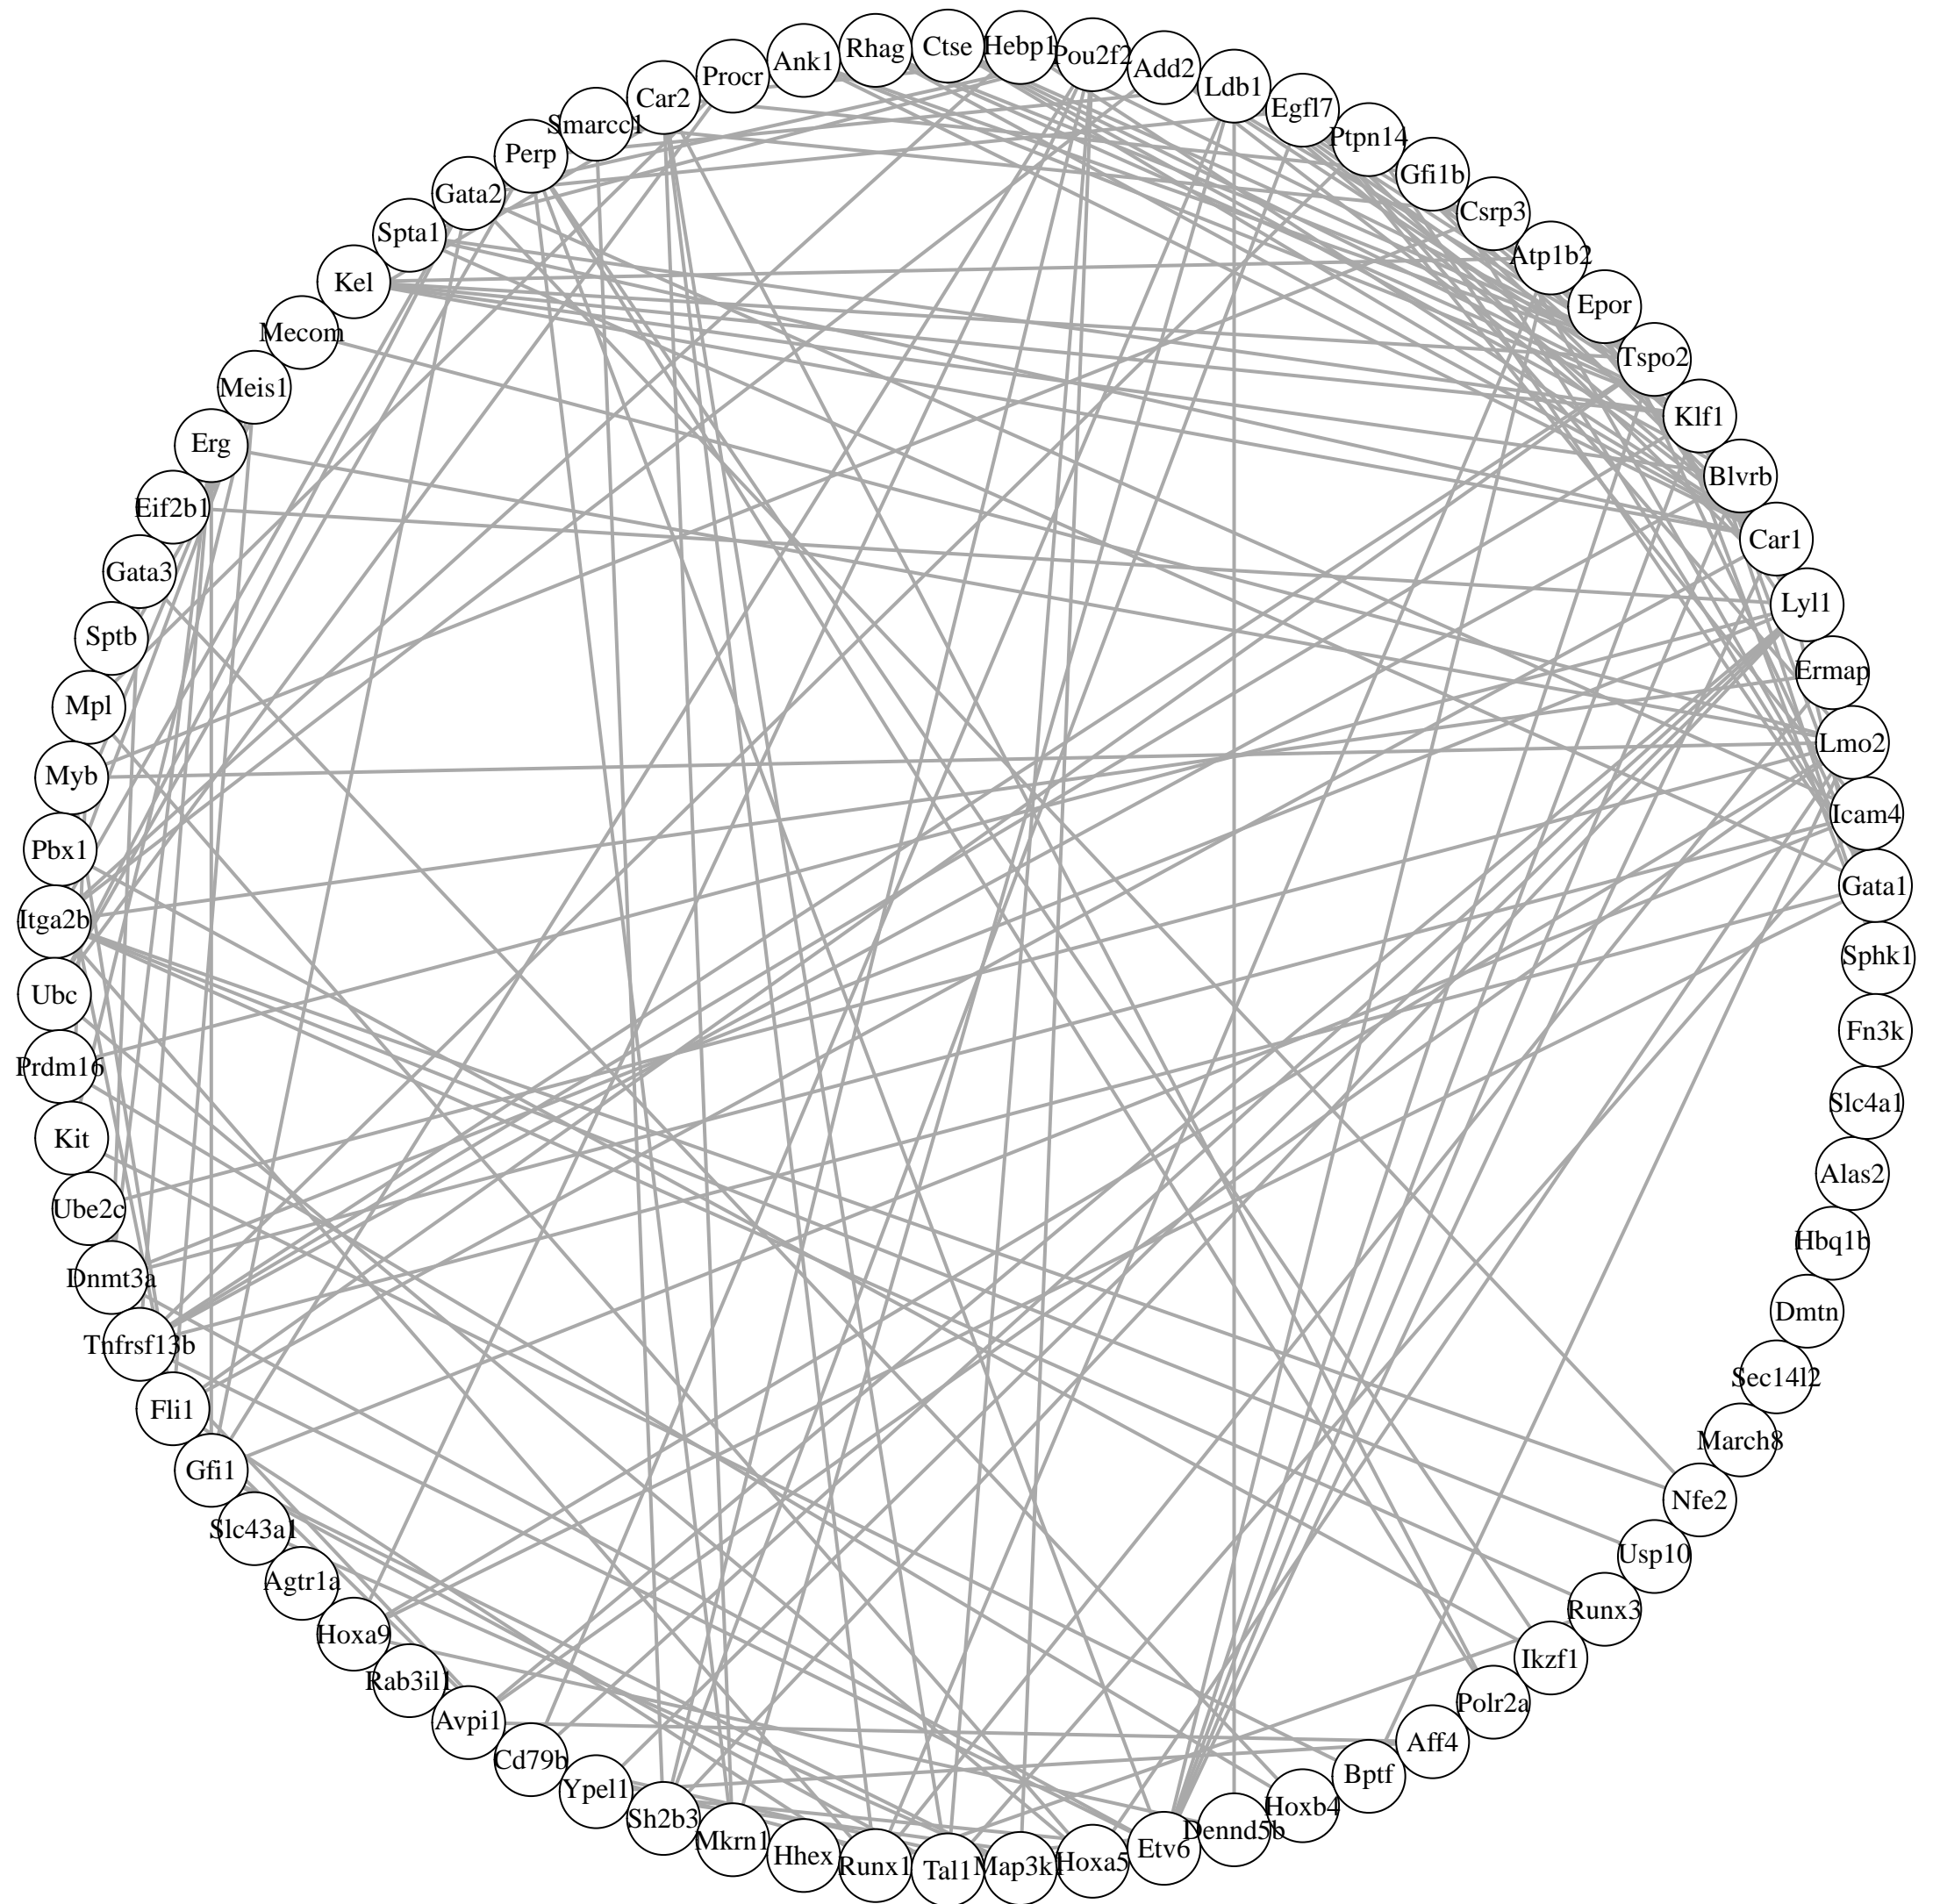



mouse\_HSCtoMEP\_time 9

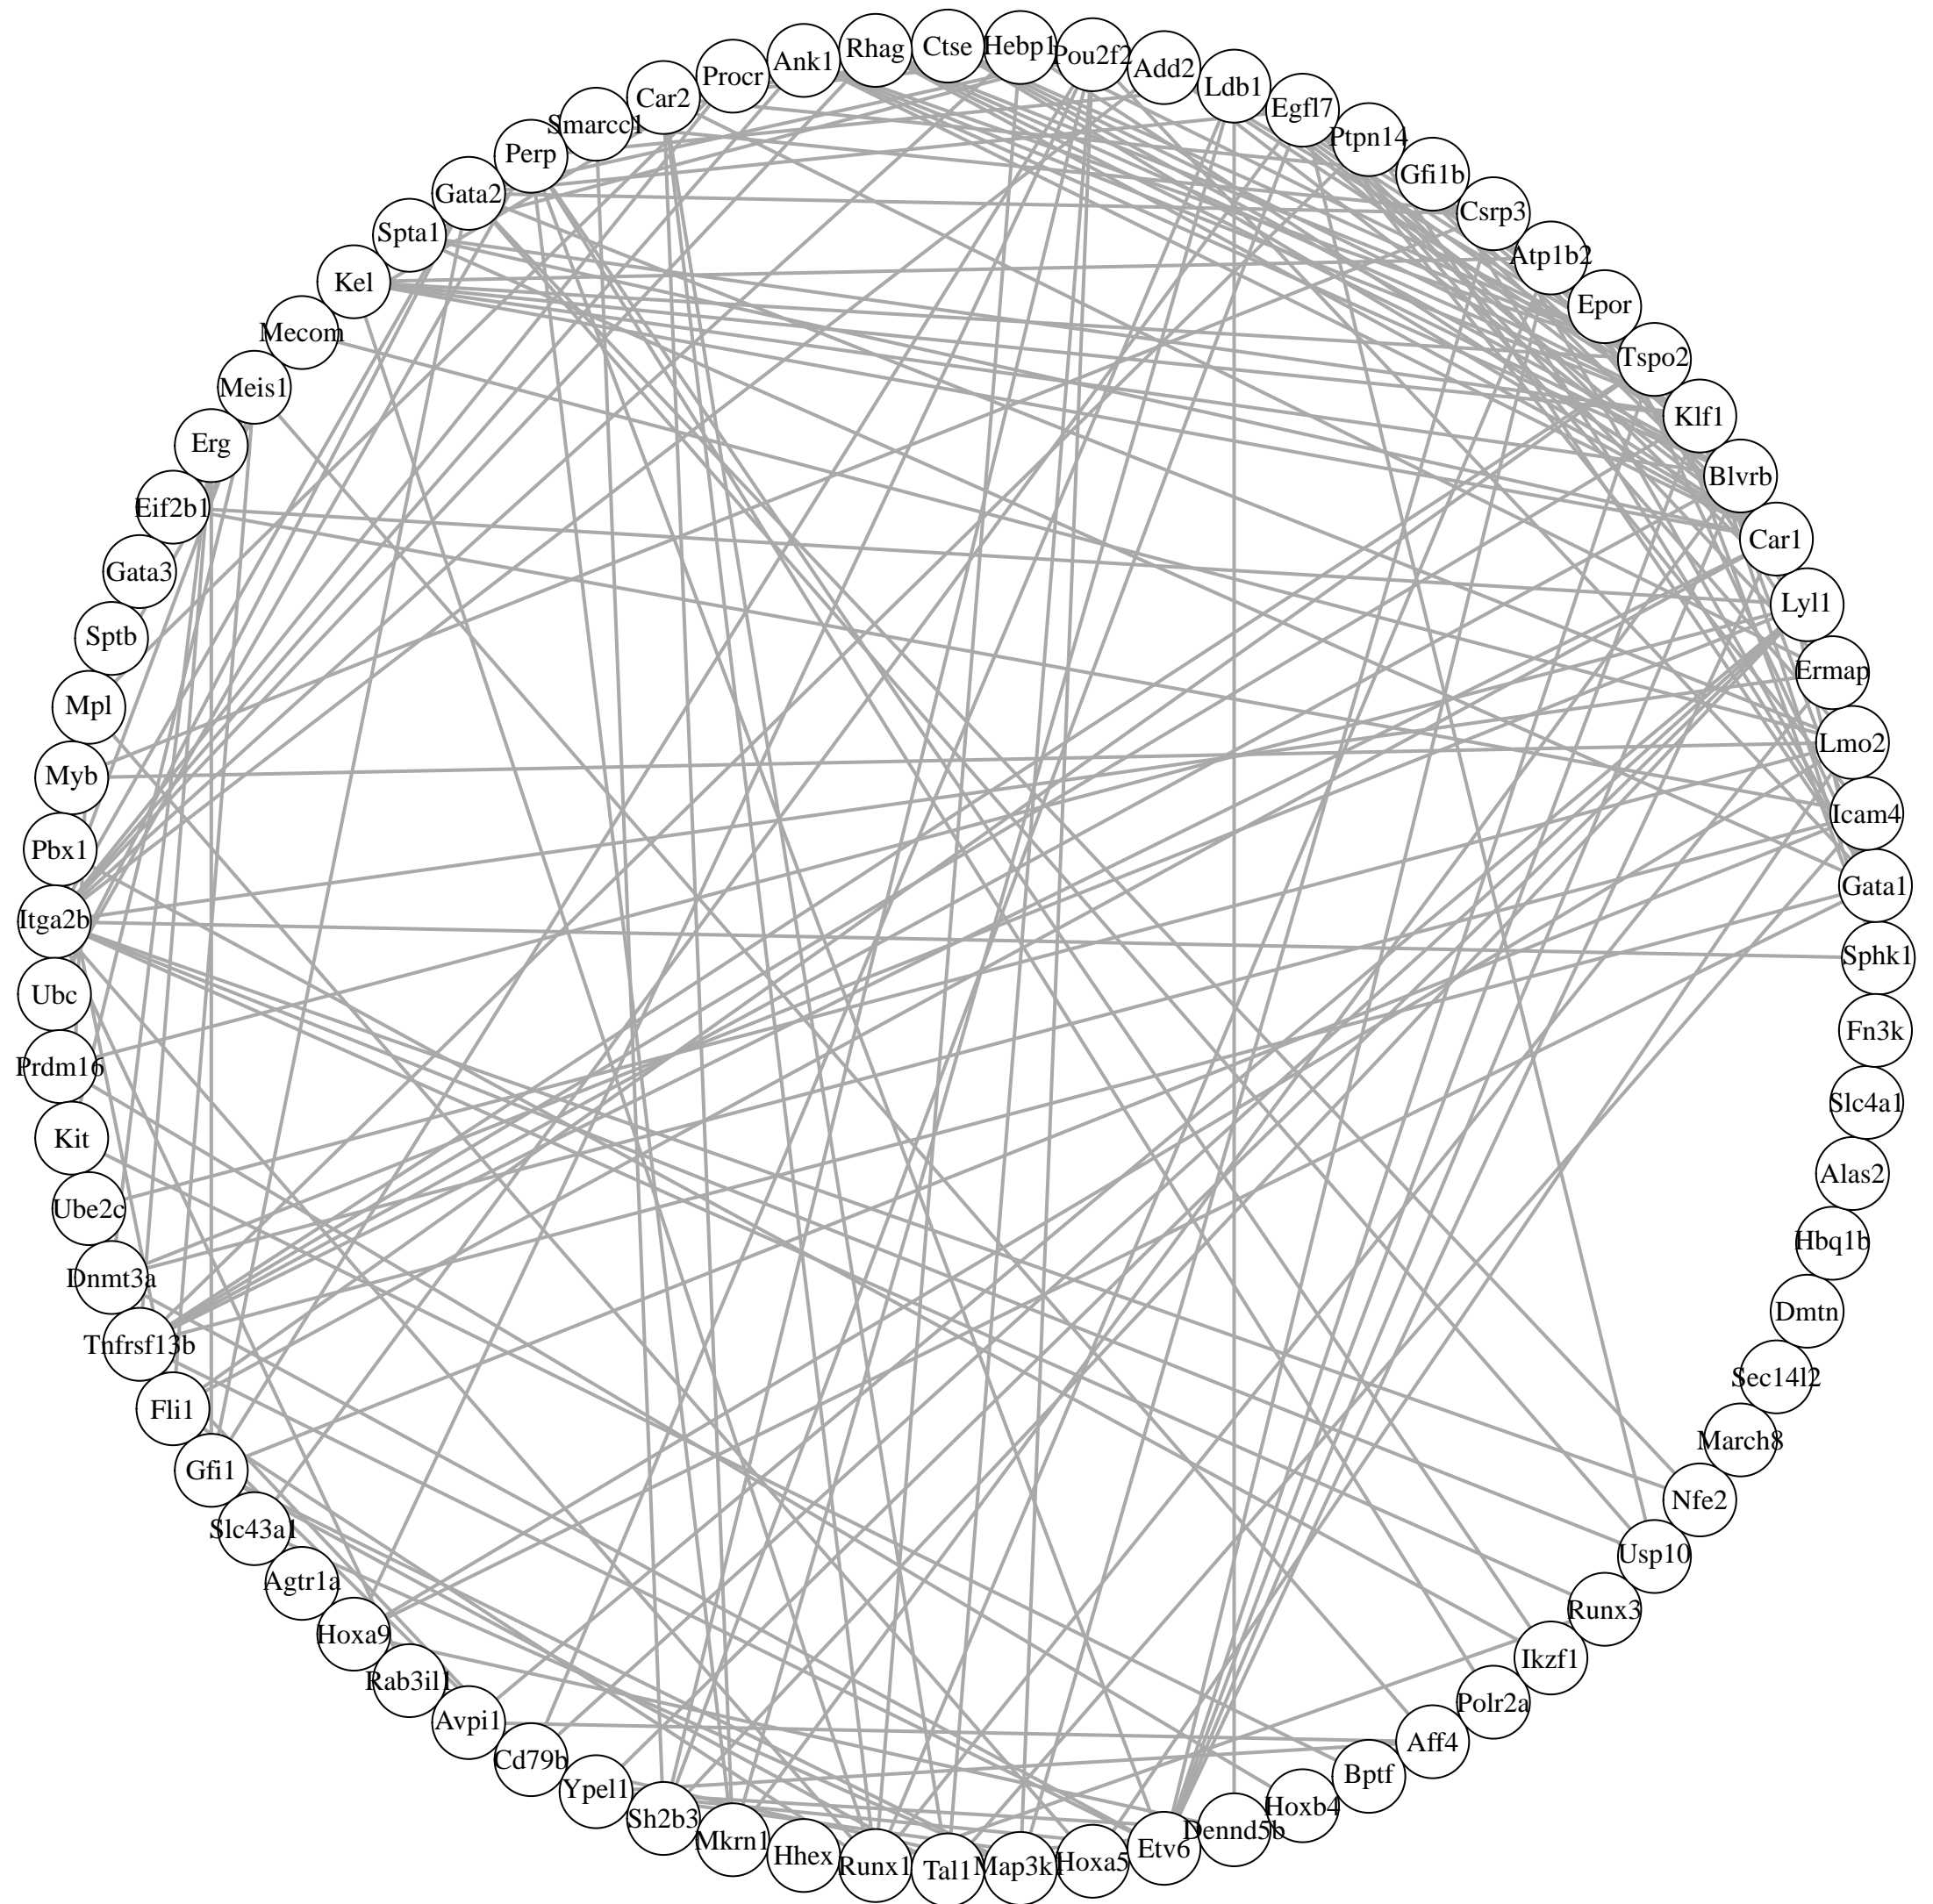

mouse\_HSCtoMEP\_time 10

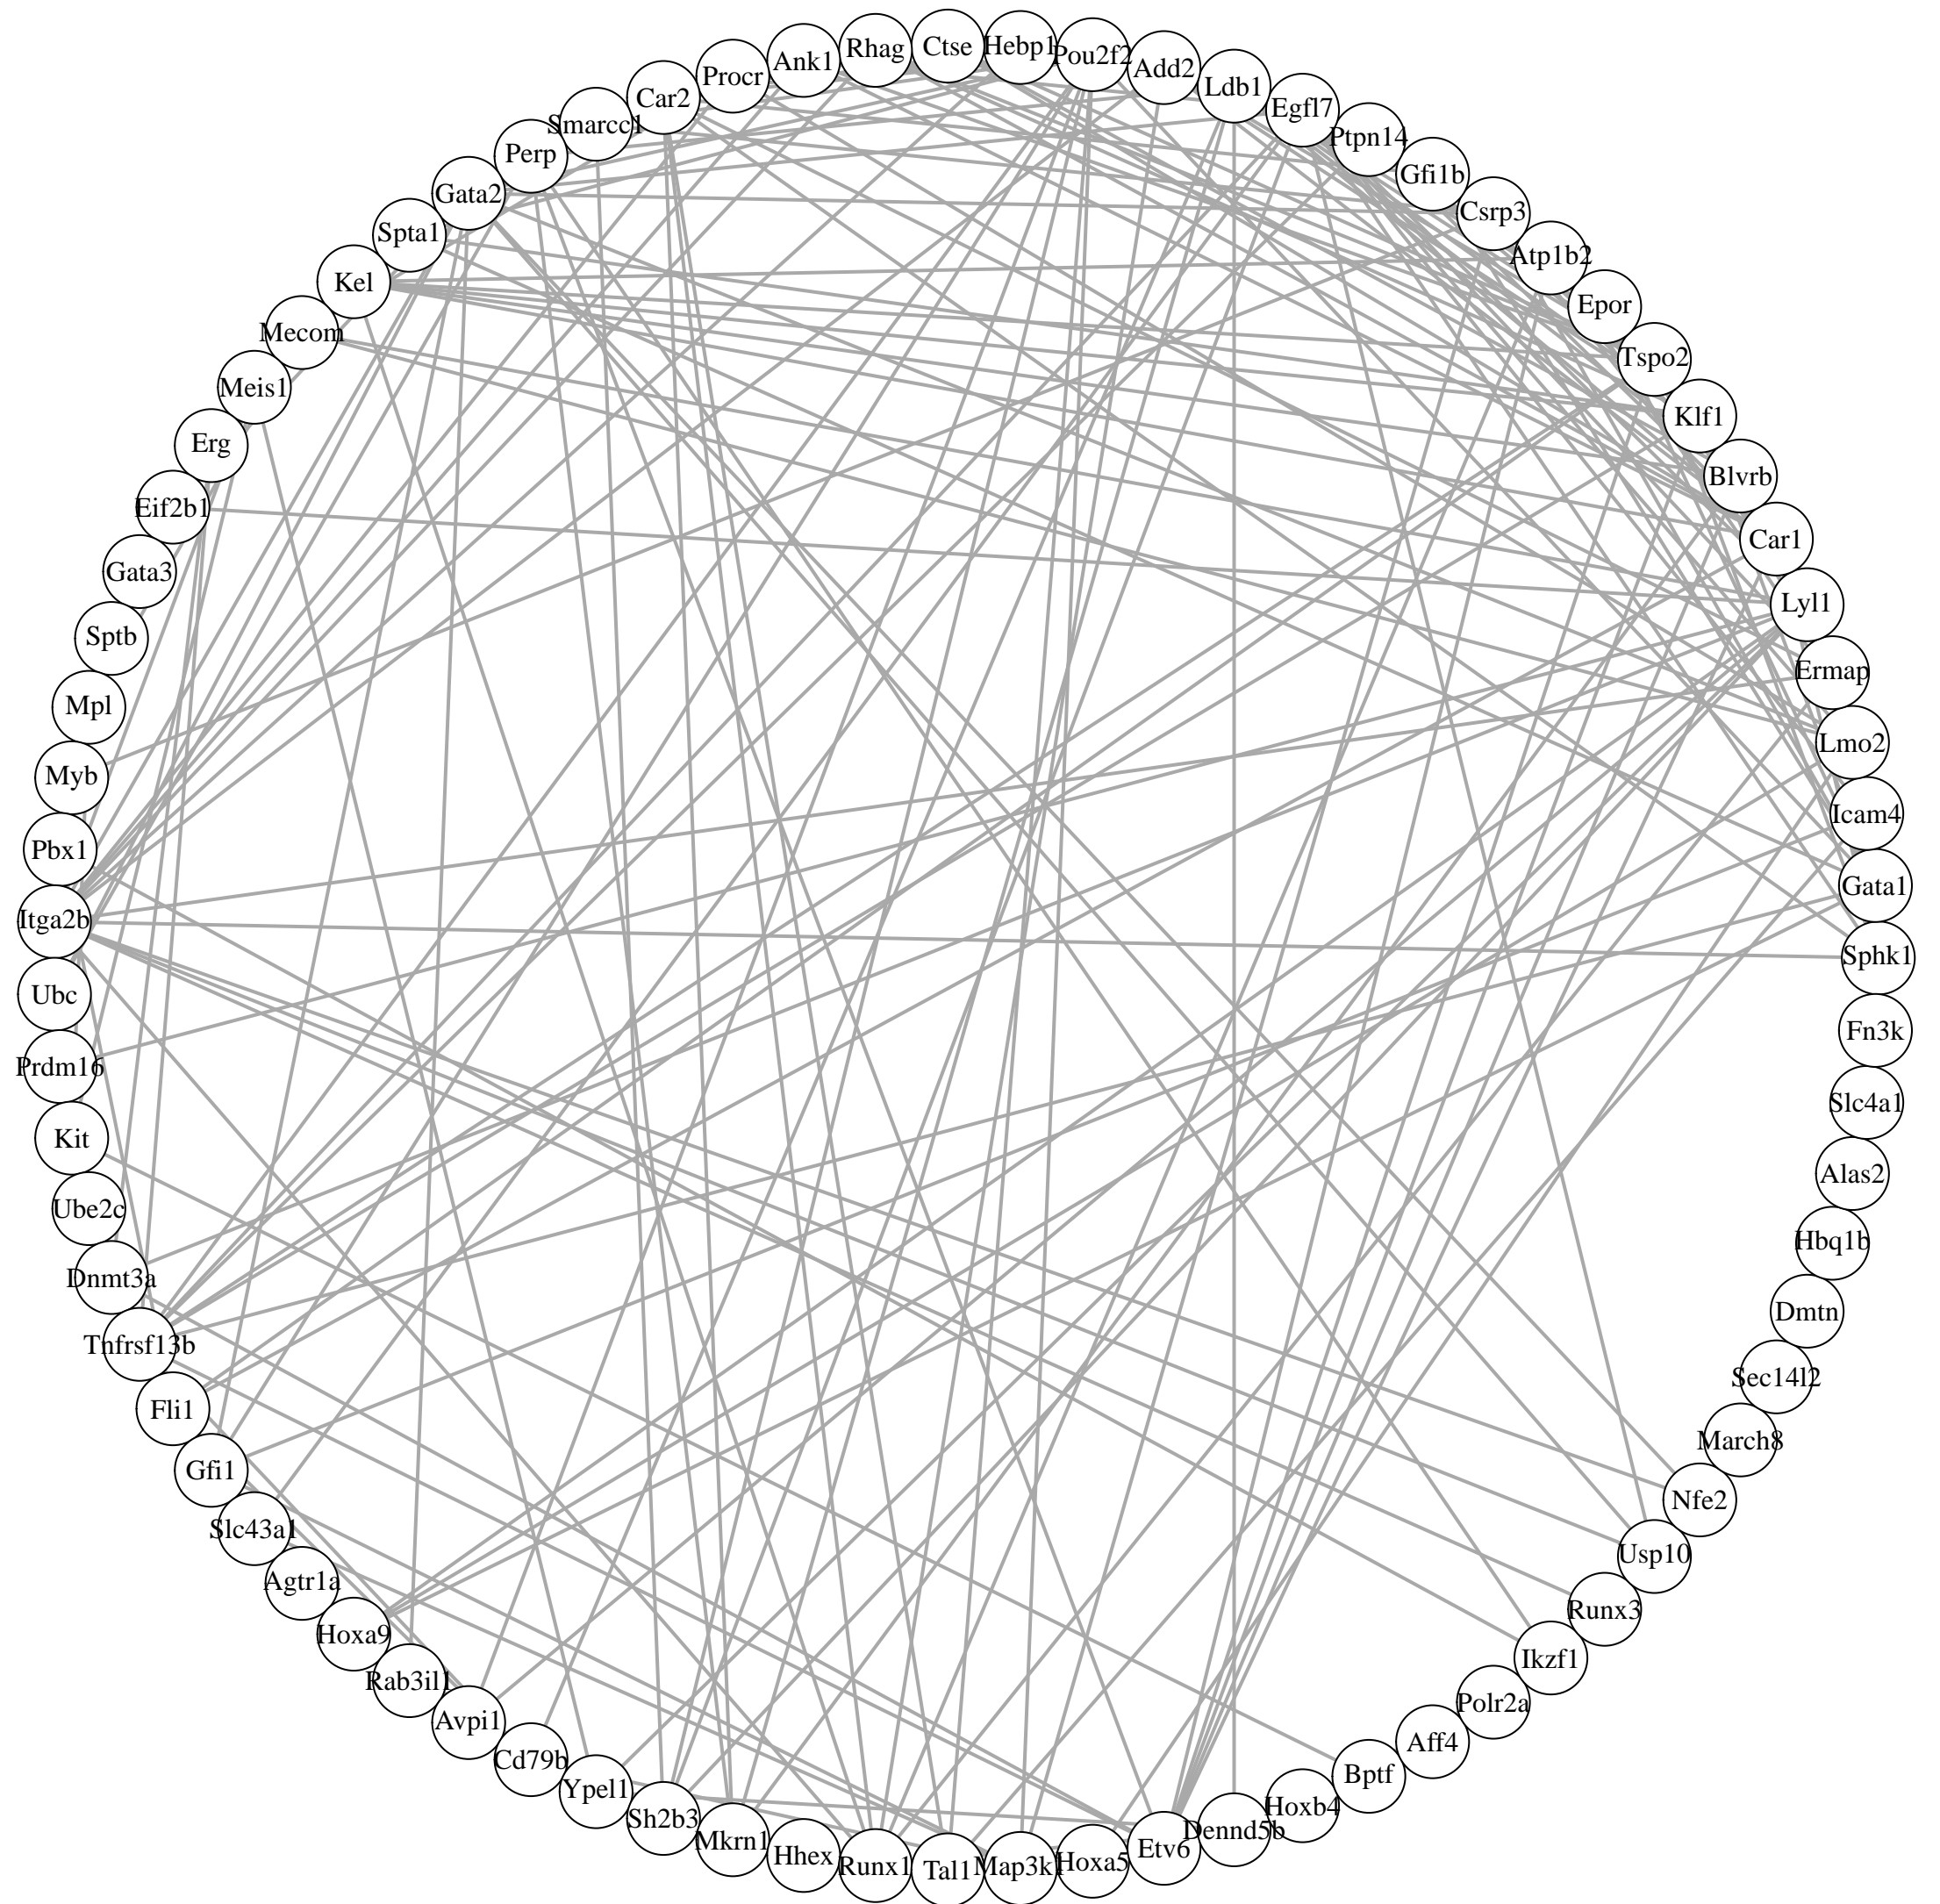

mouse\_HSCtoMEP\_time 11

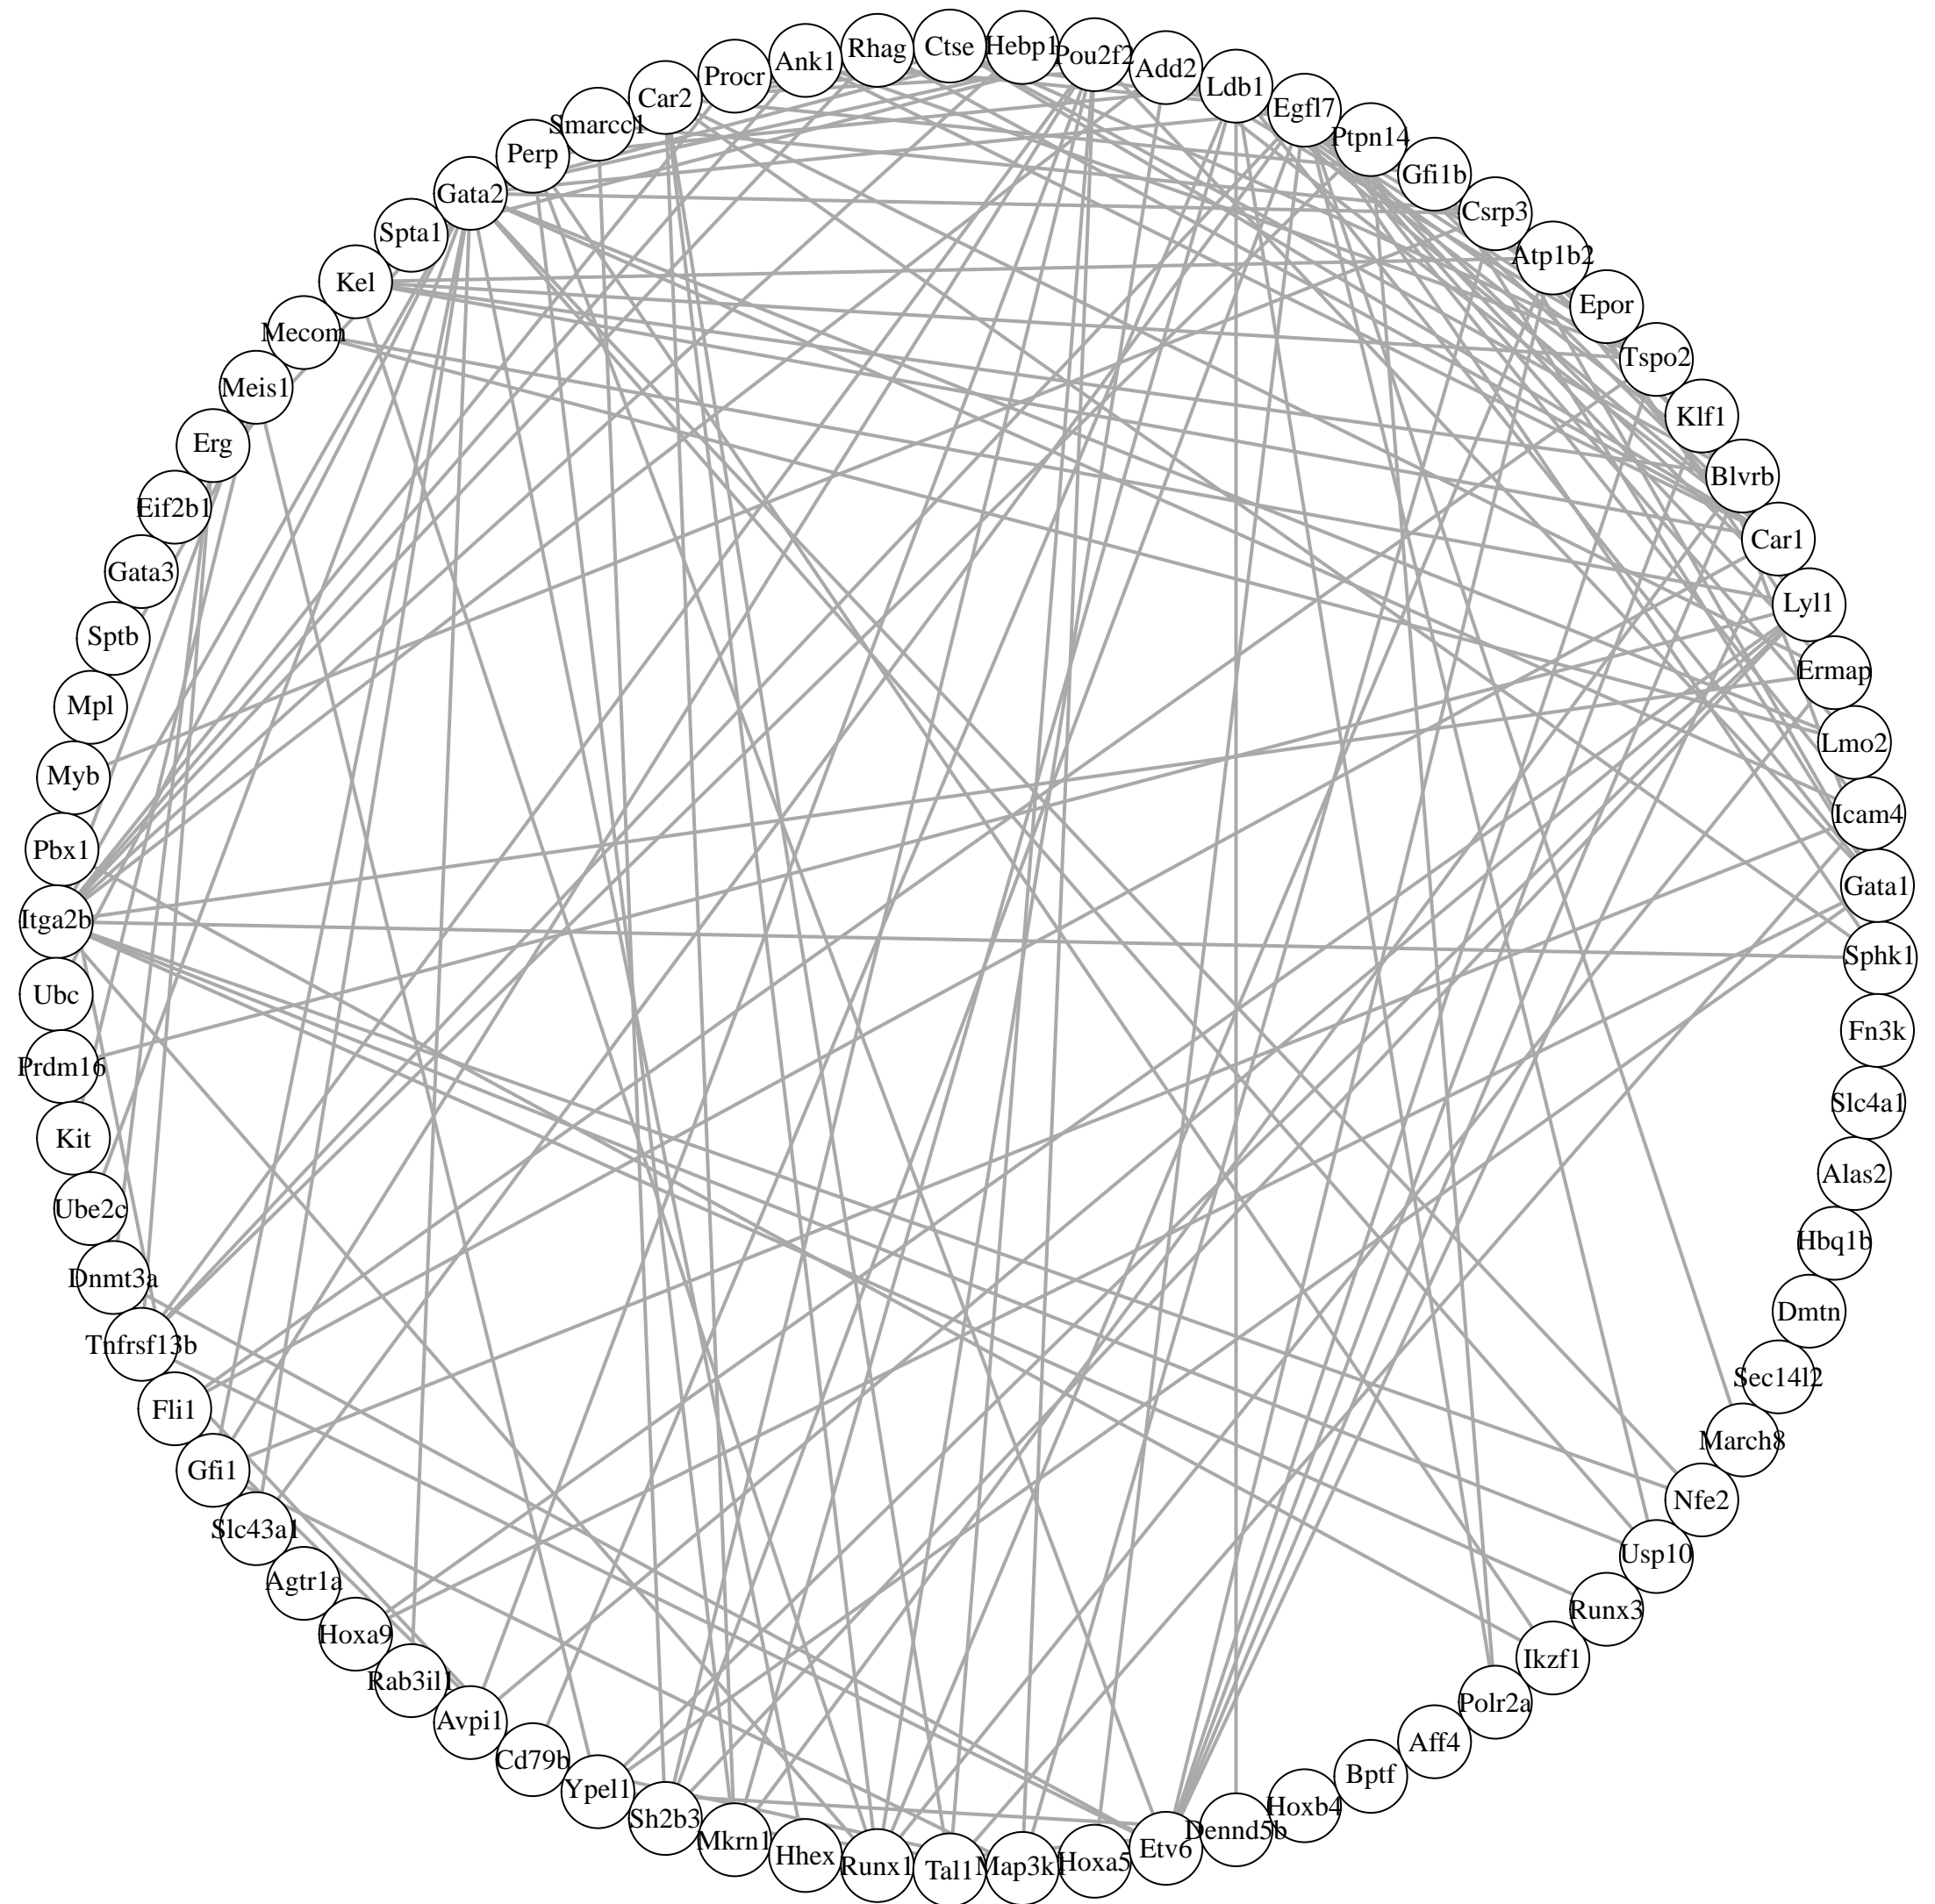

mouse\_HSCtoMEP\_time 12

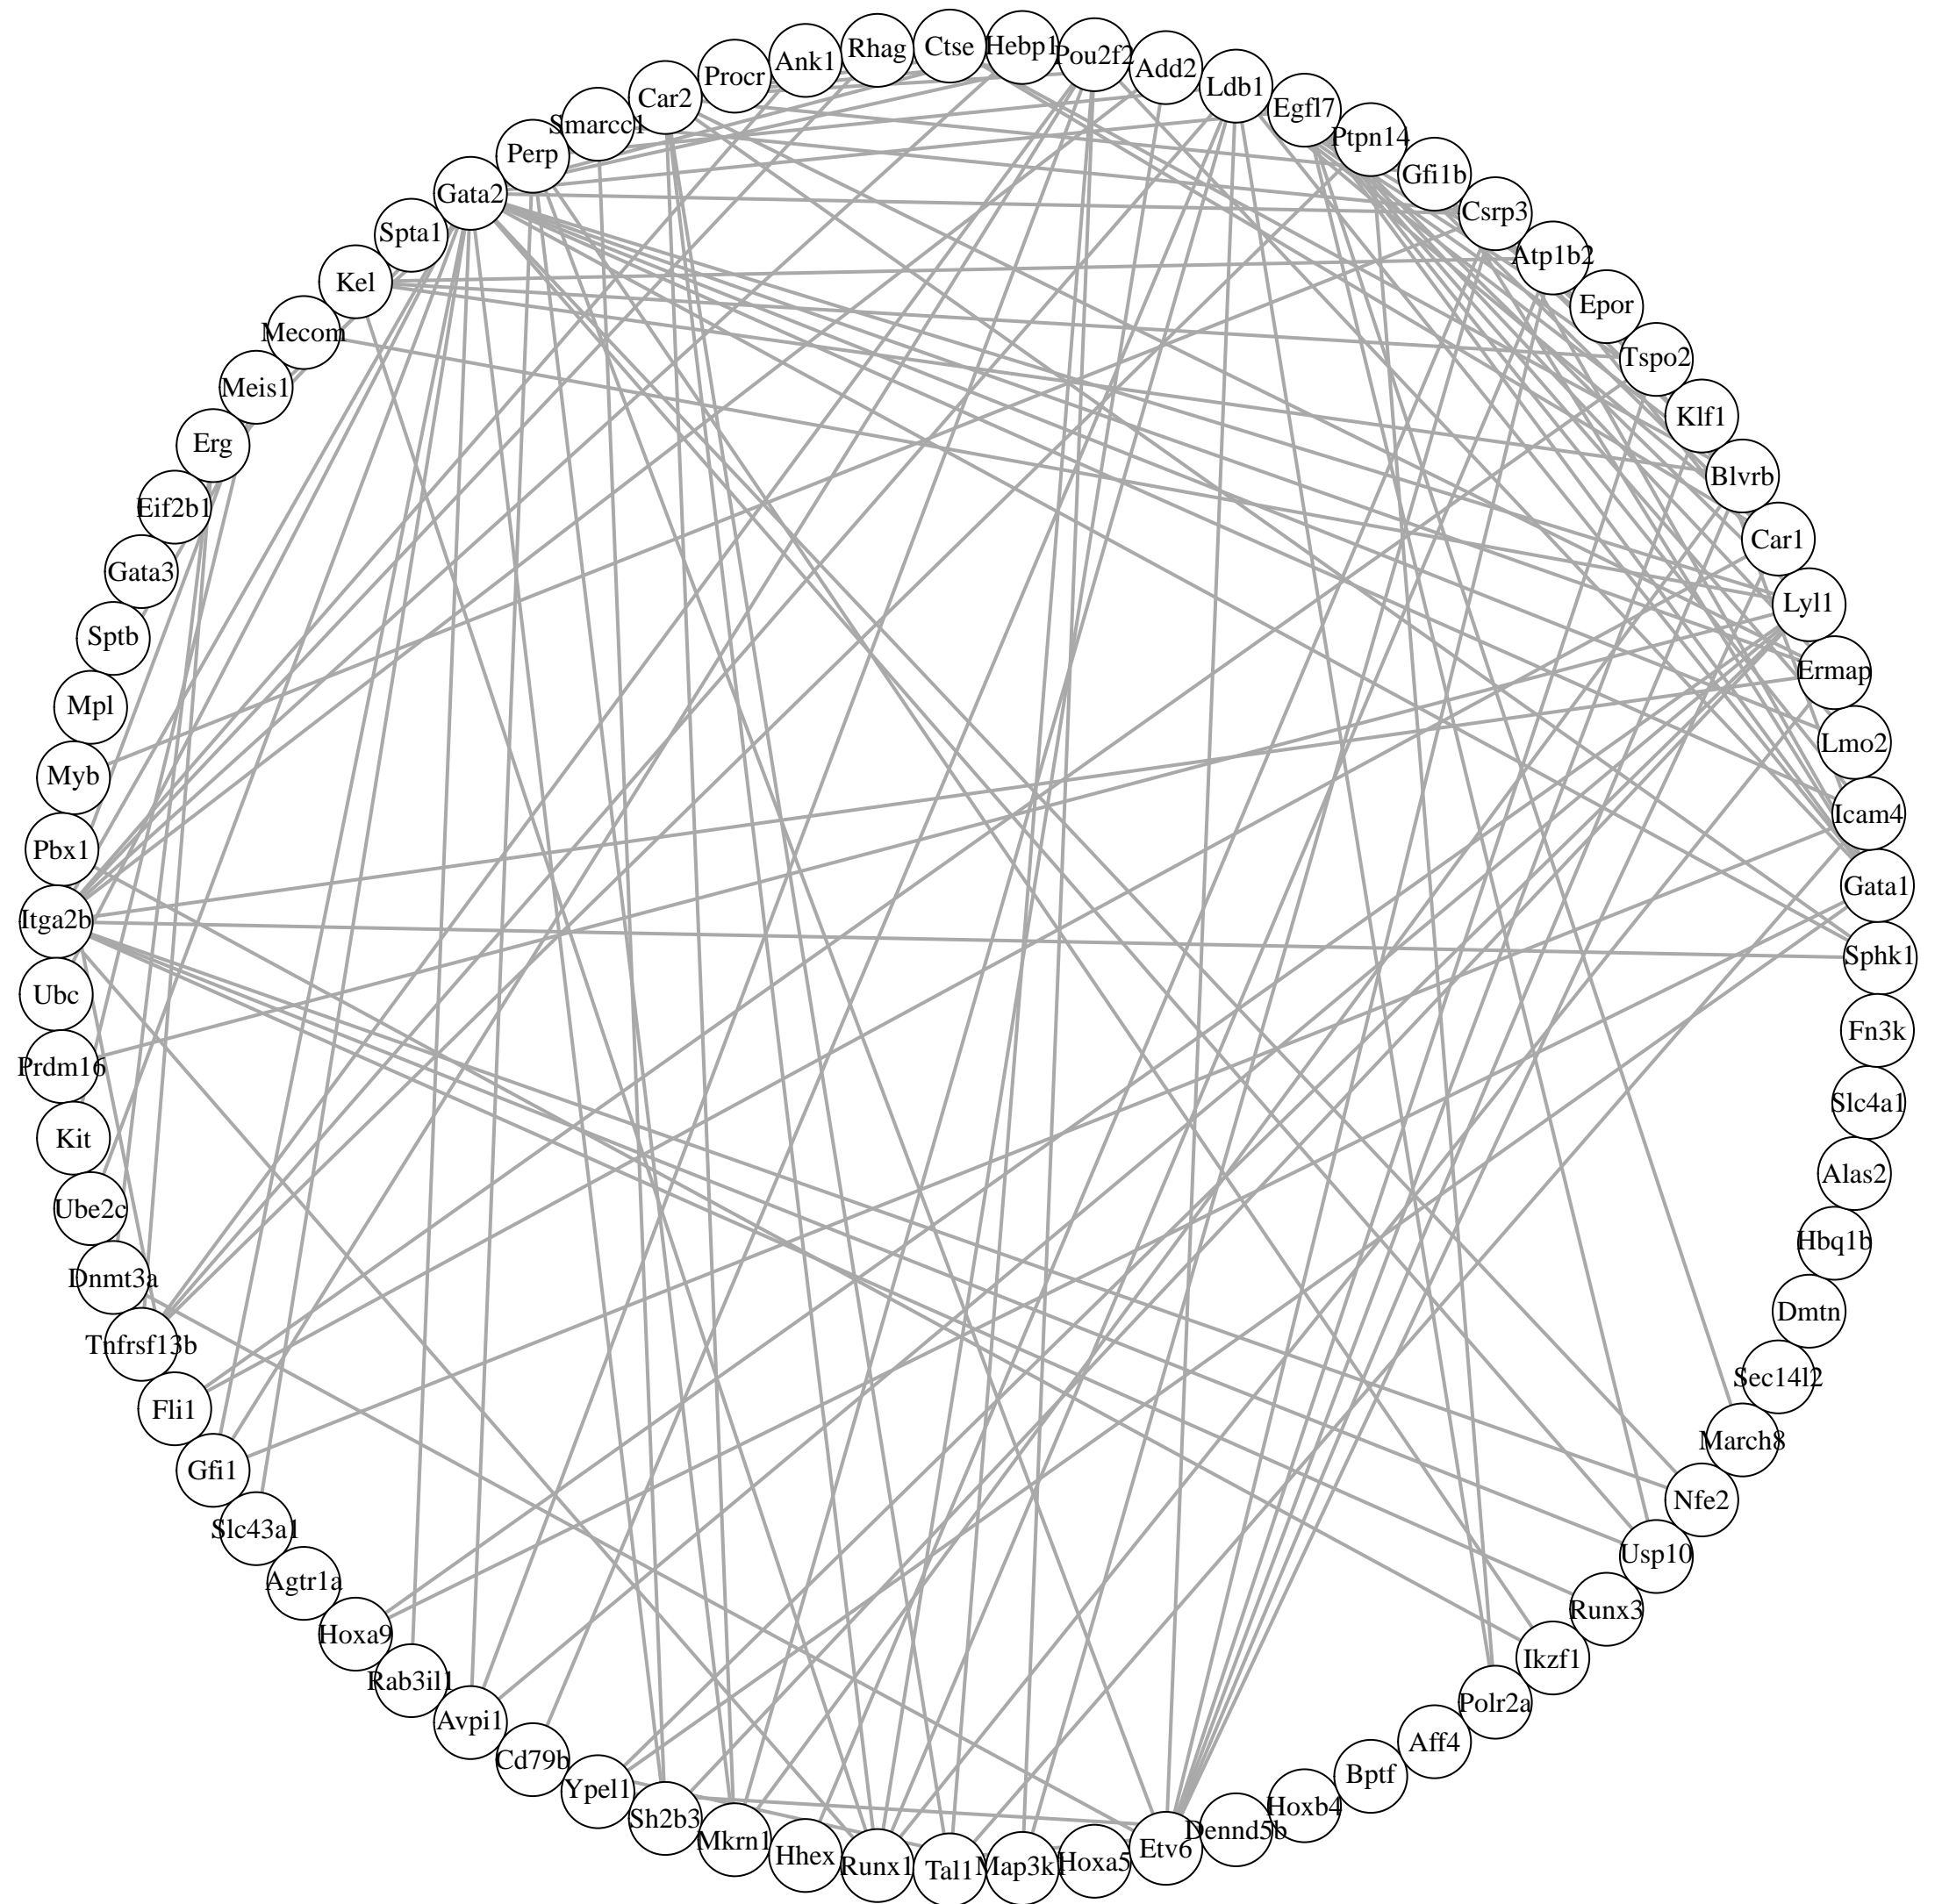



mouse\_HSCtoMEP\_time 13

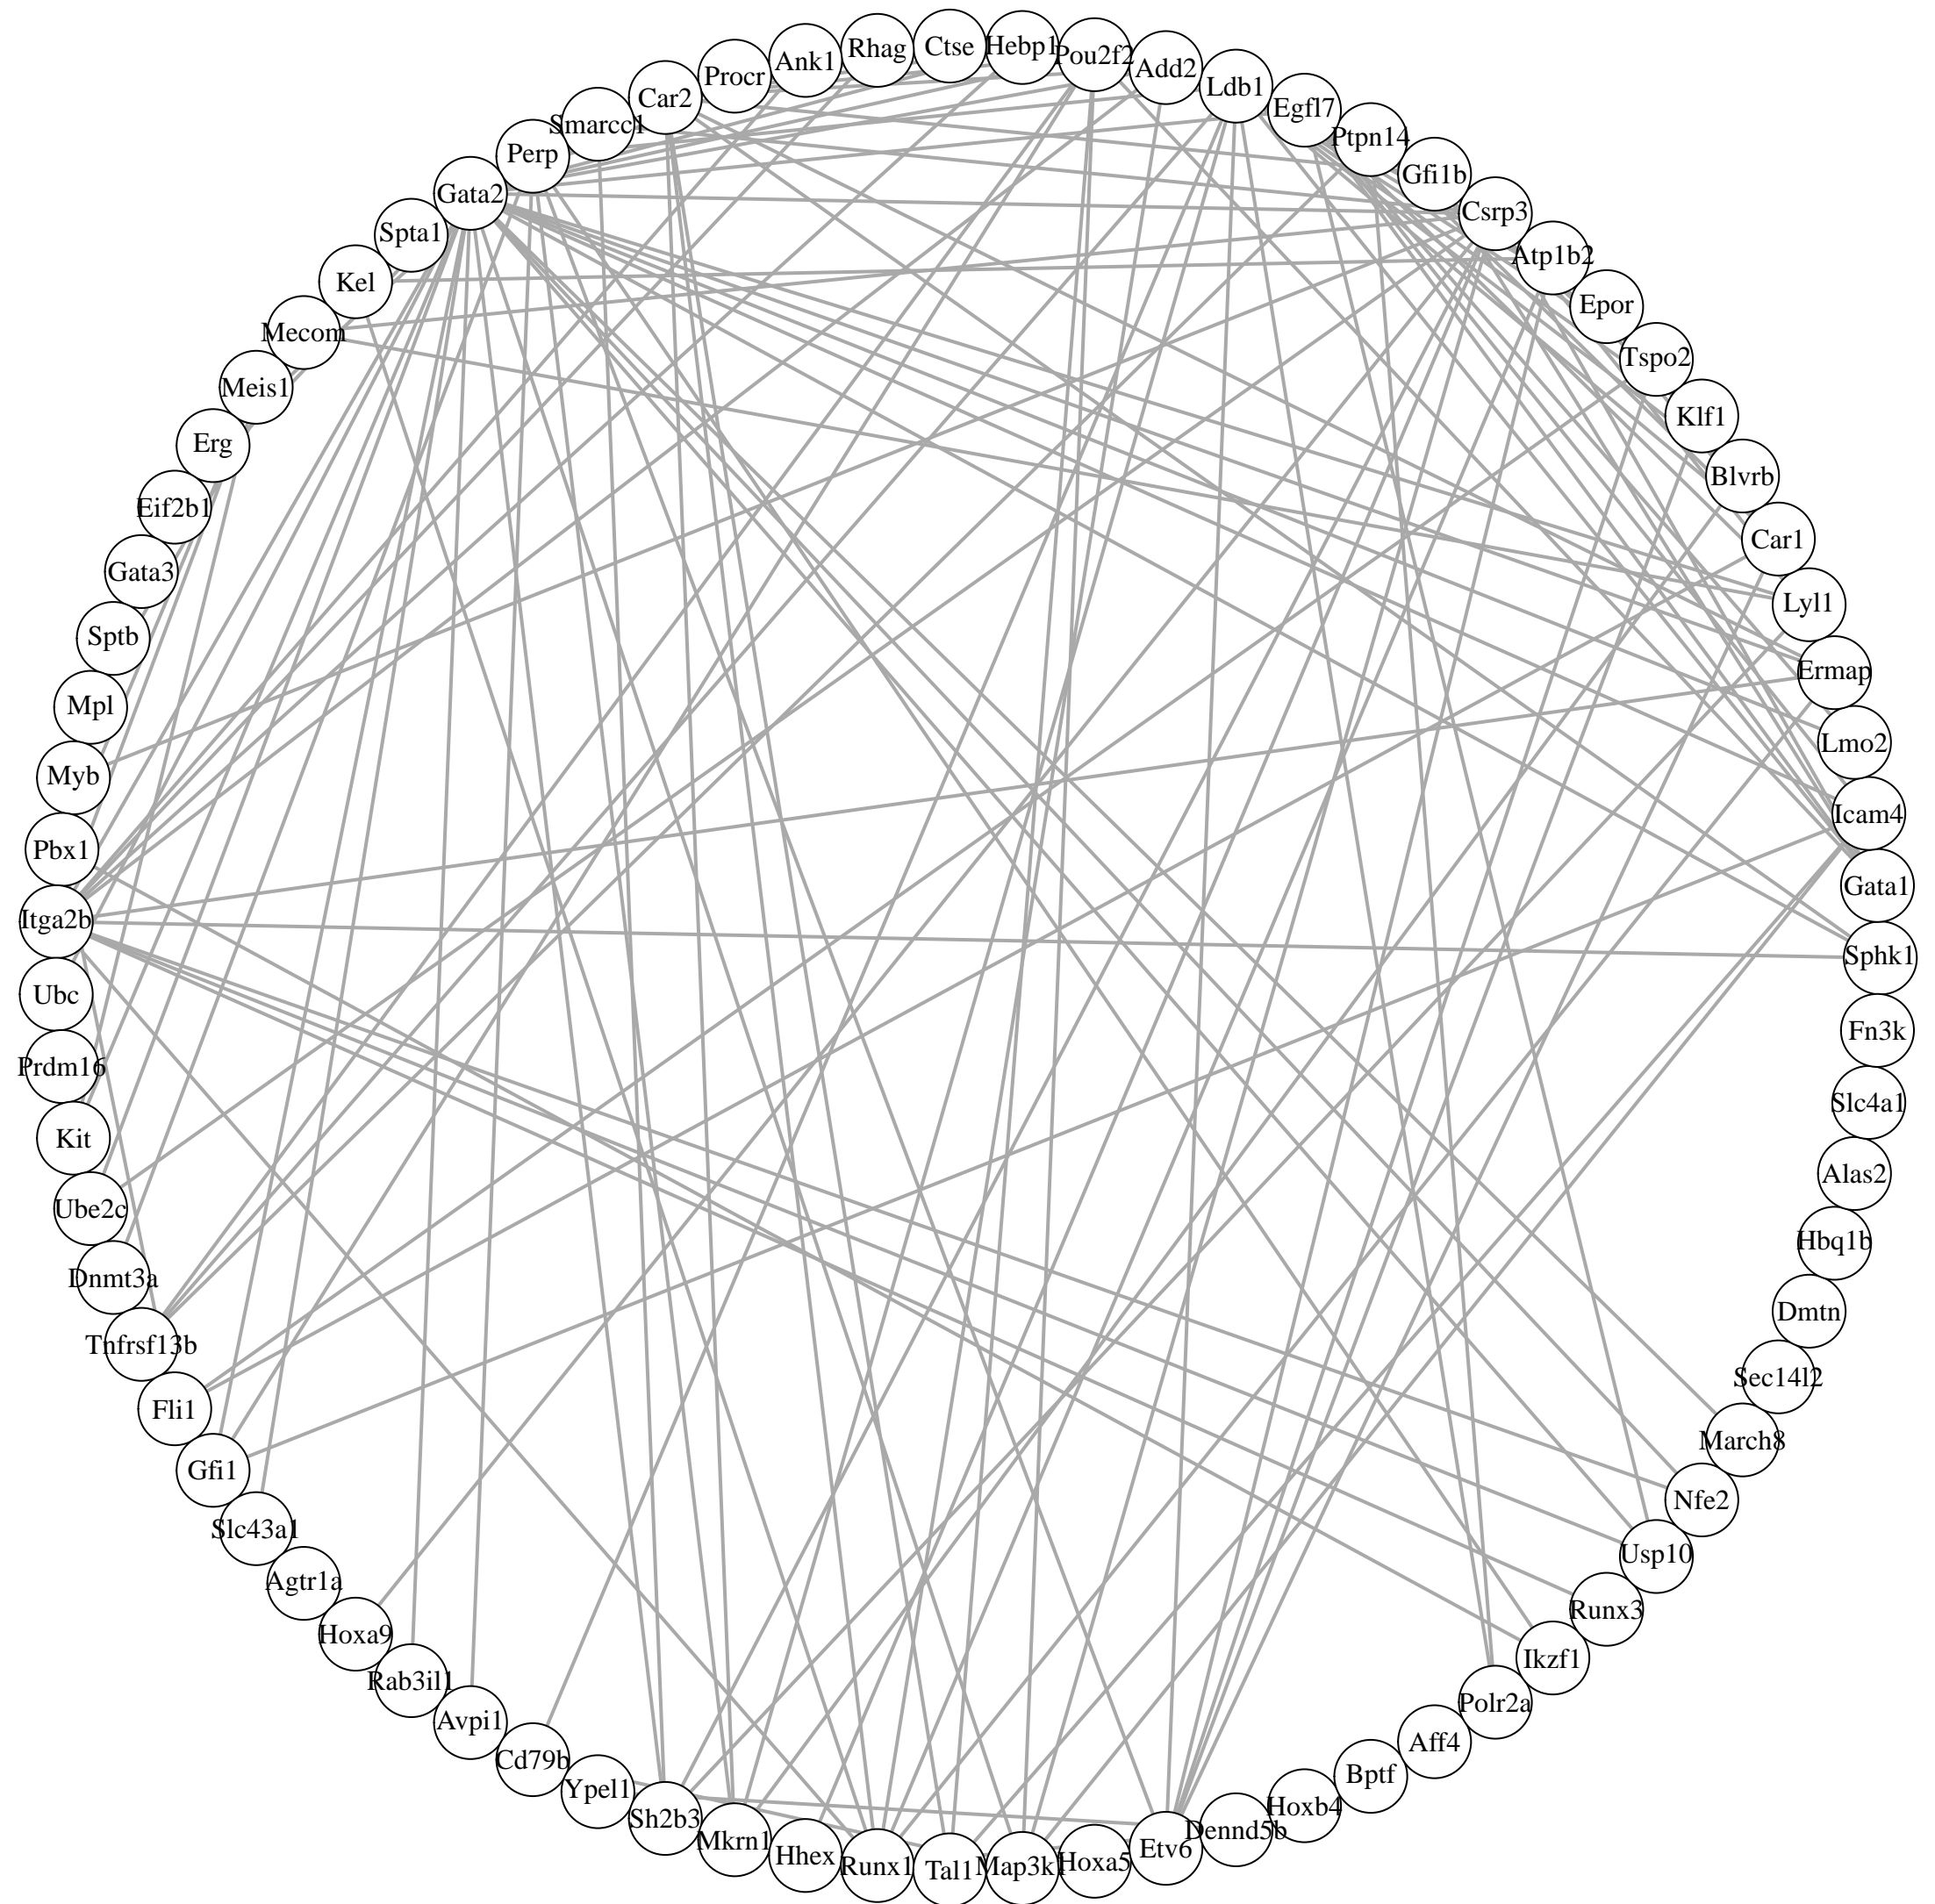



mouse\_HSCtoMEP\_time 14

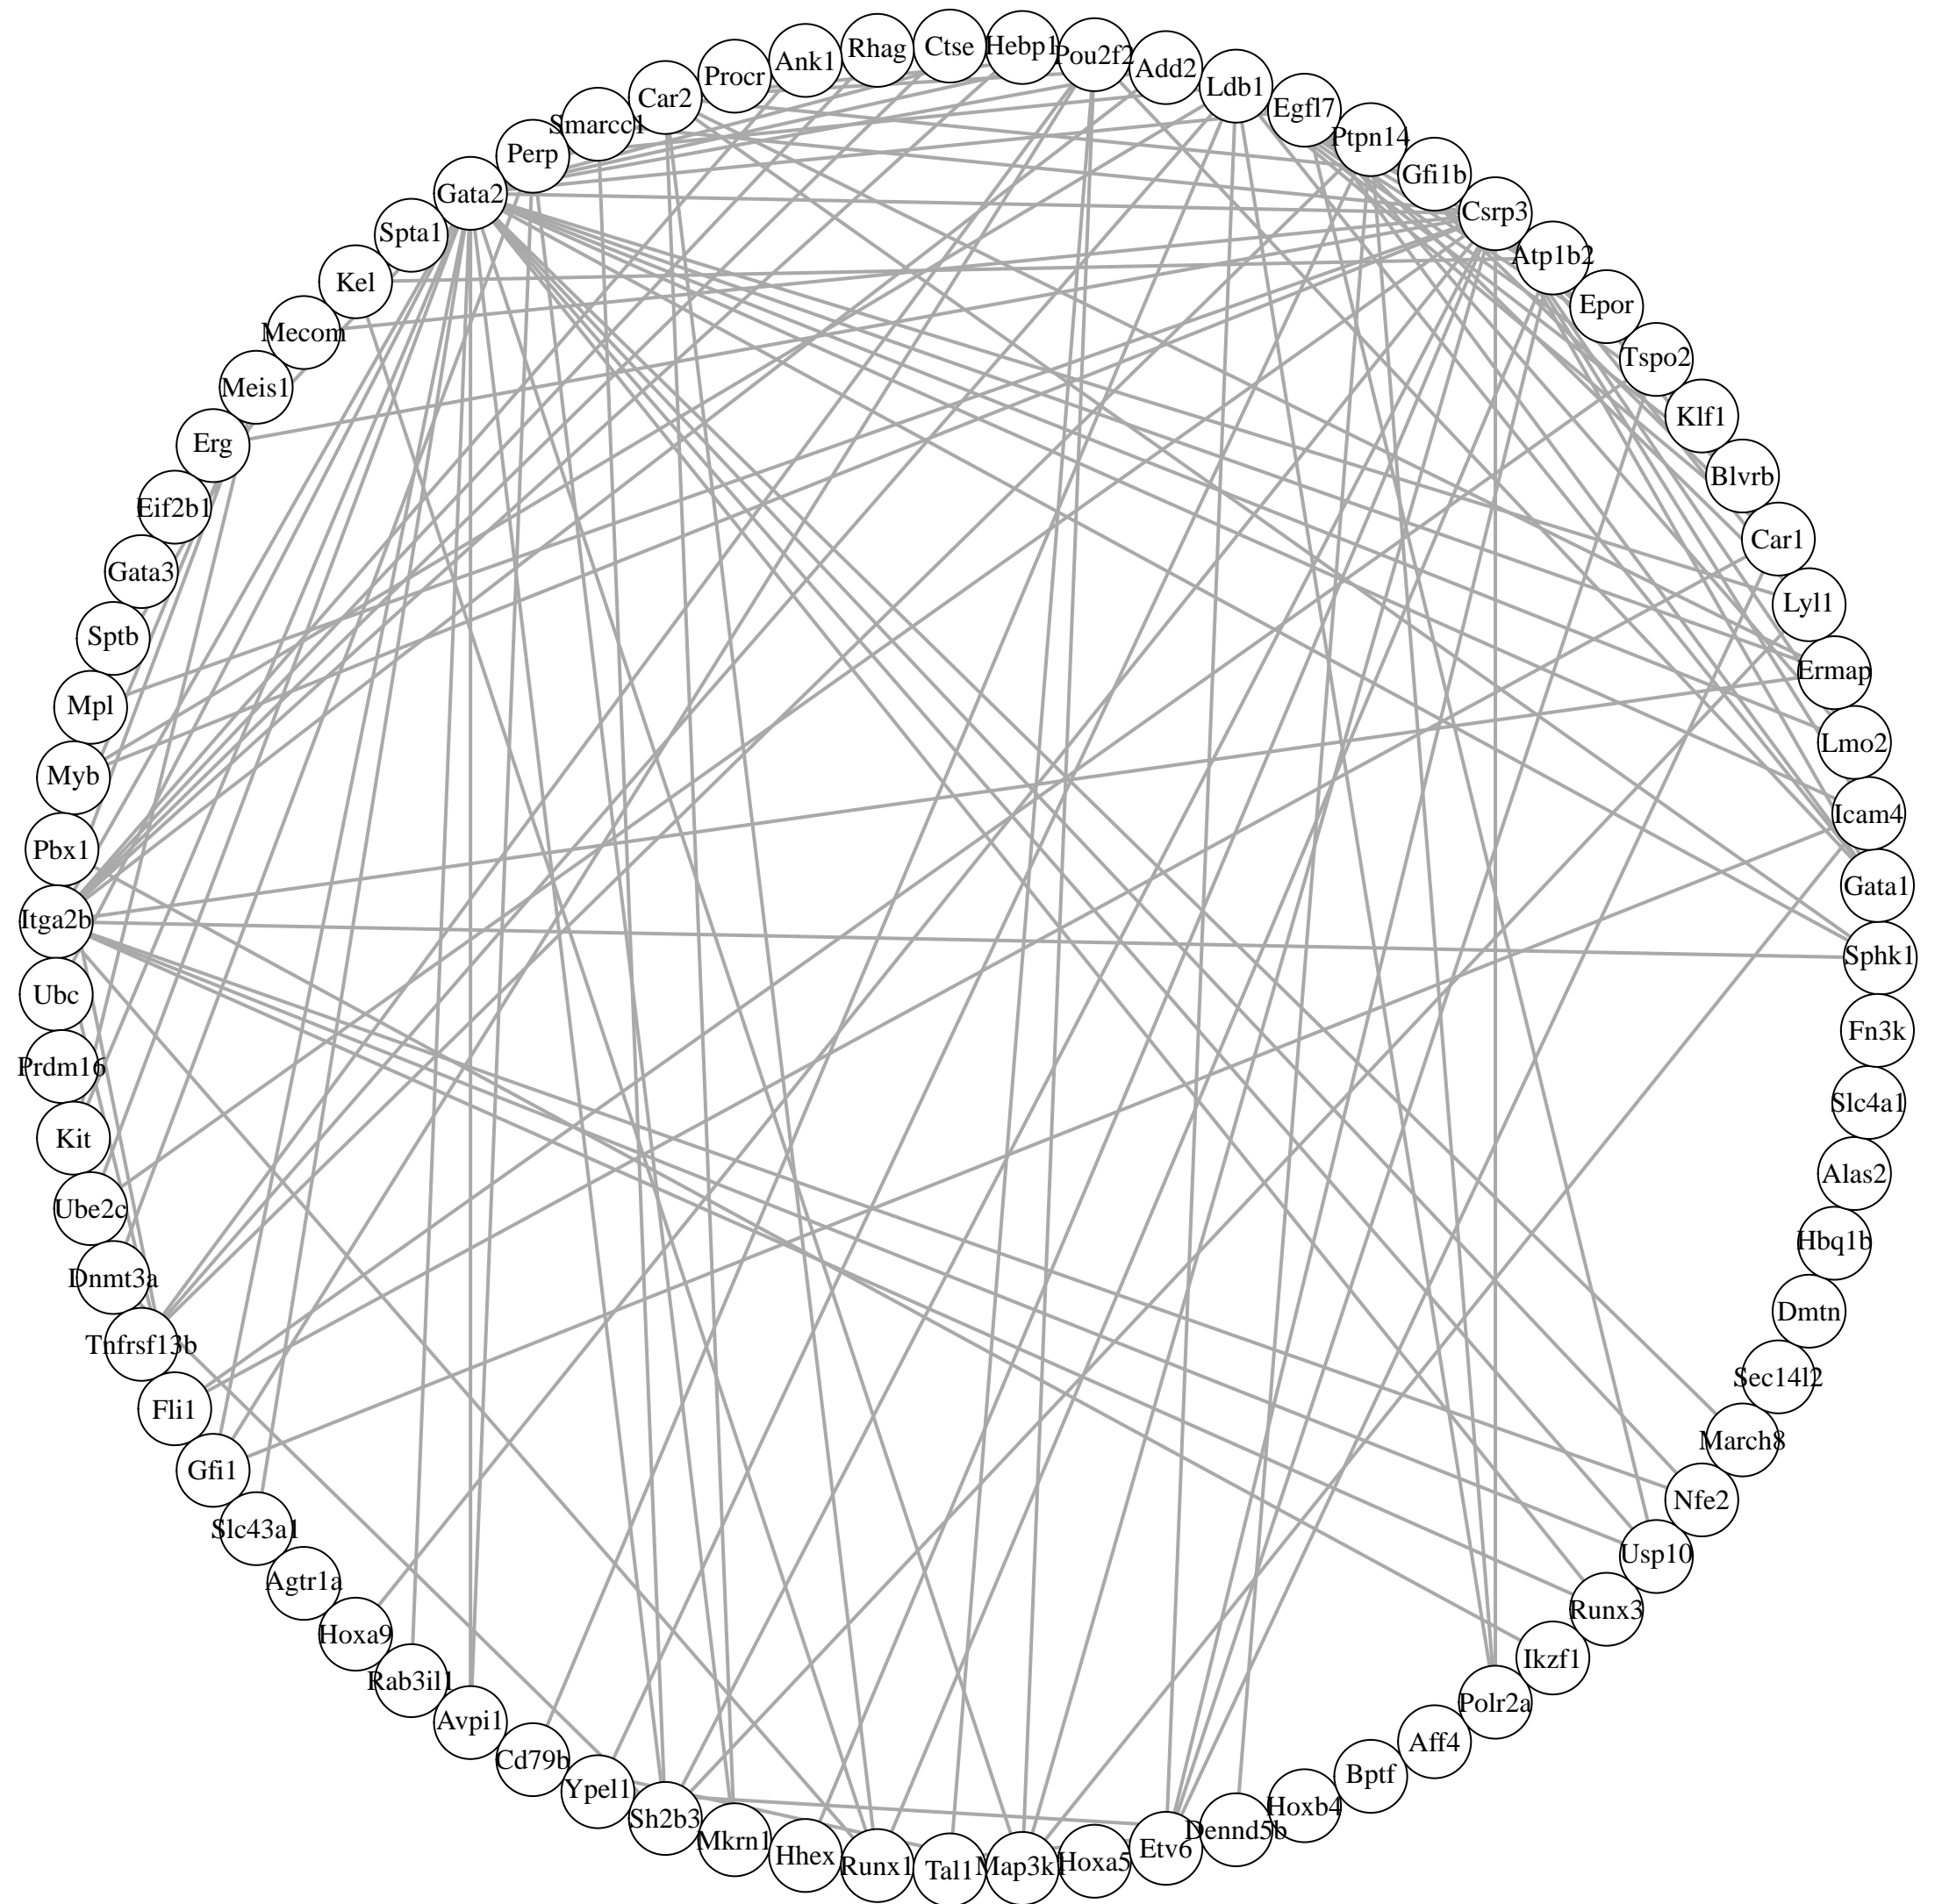

mouse\_HSCtoMEP\_time 15

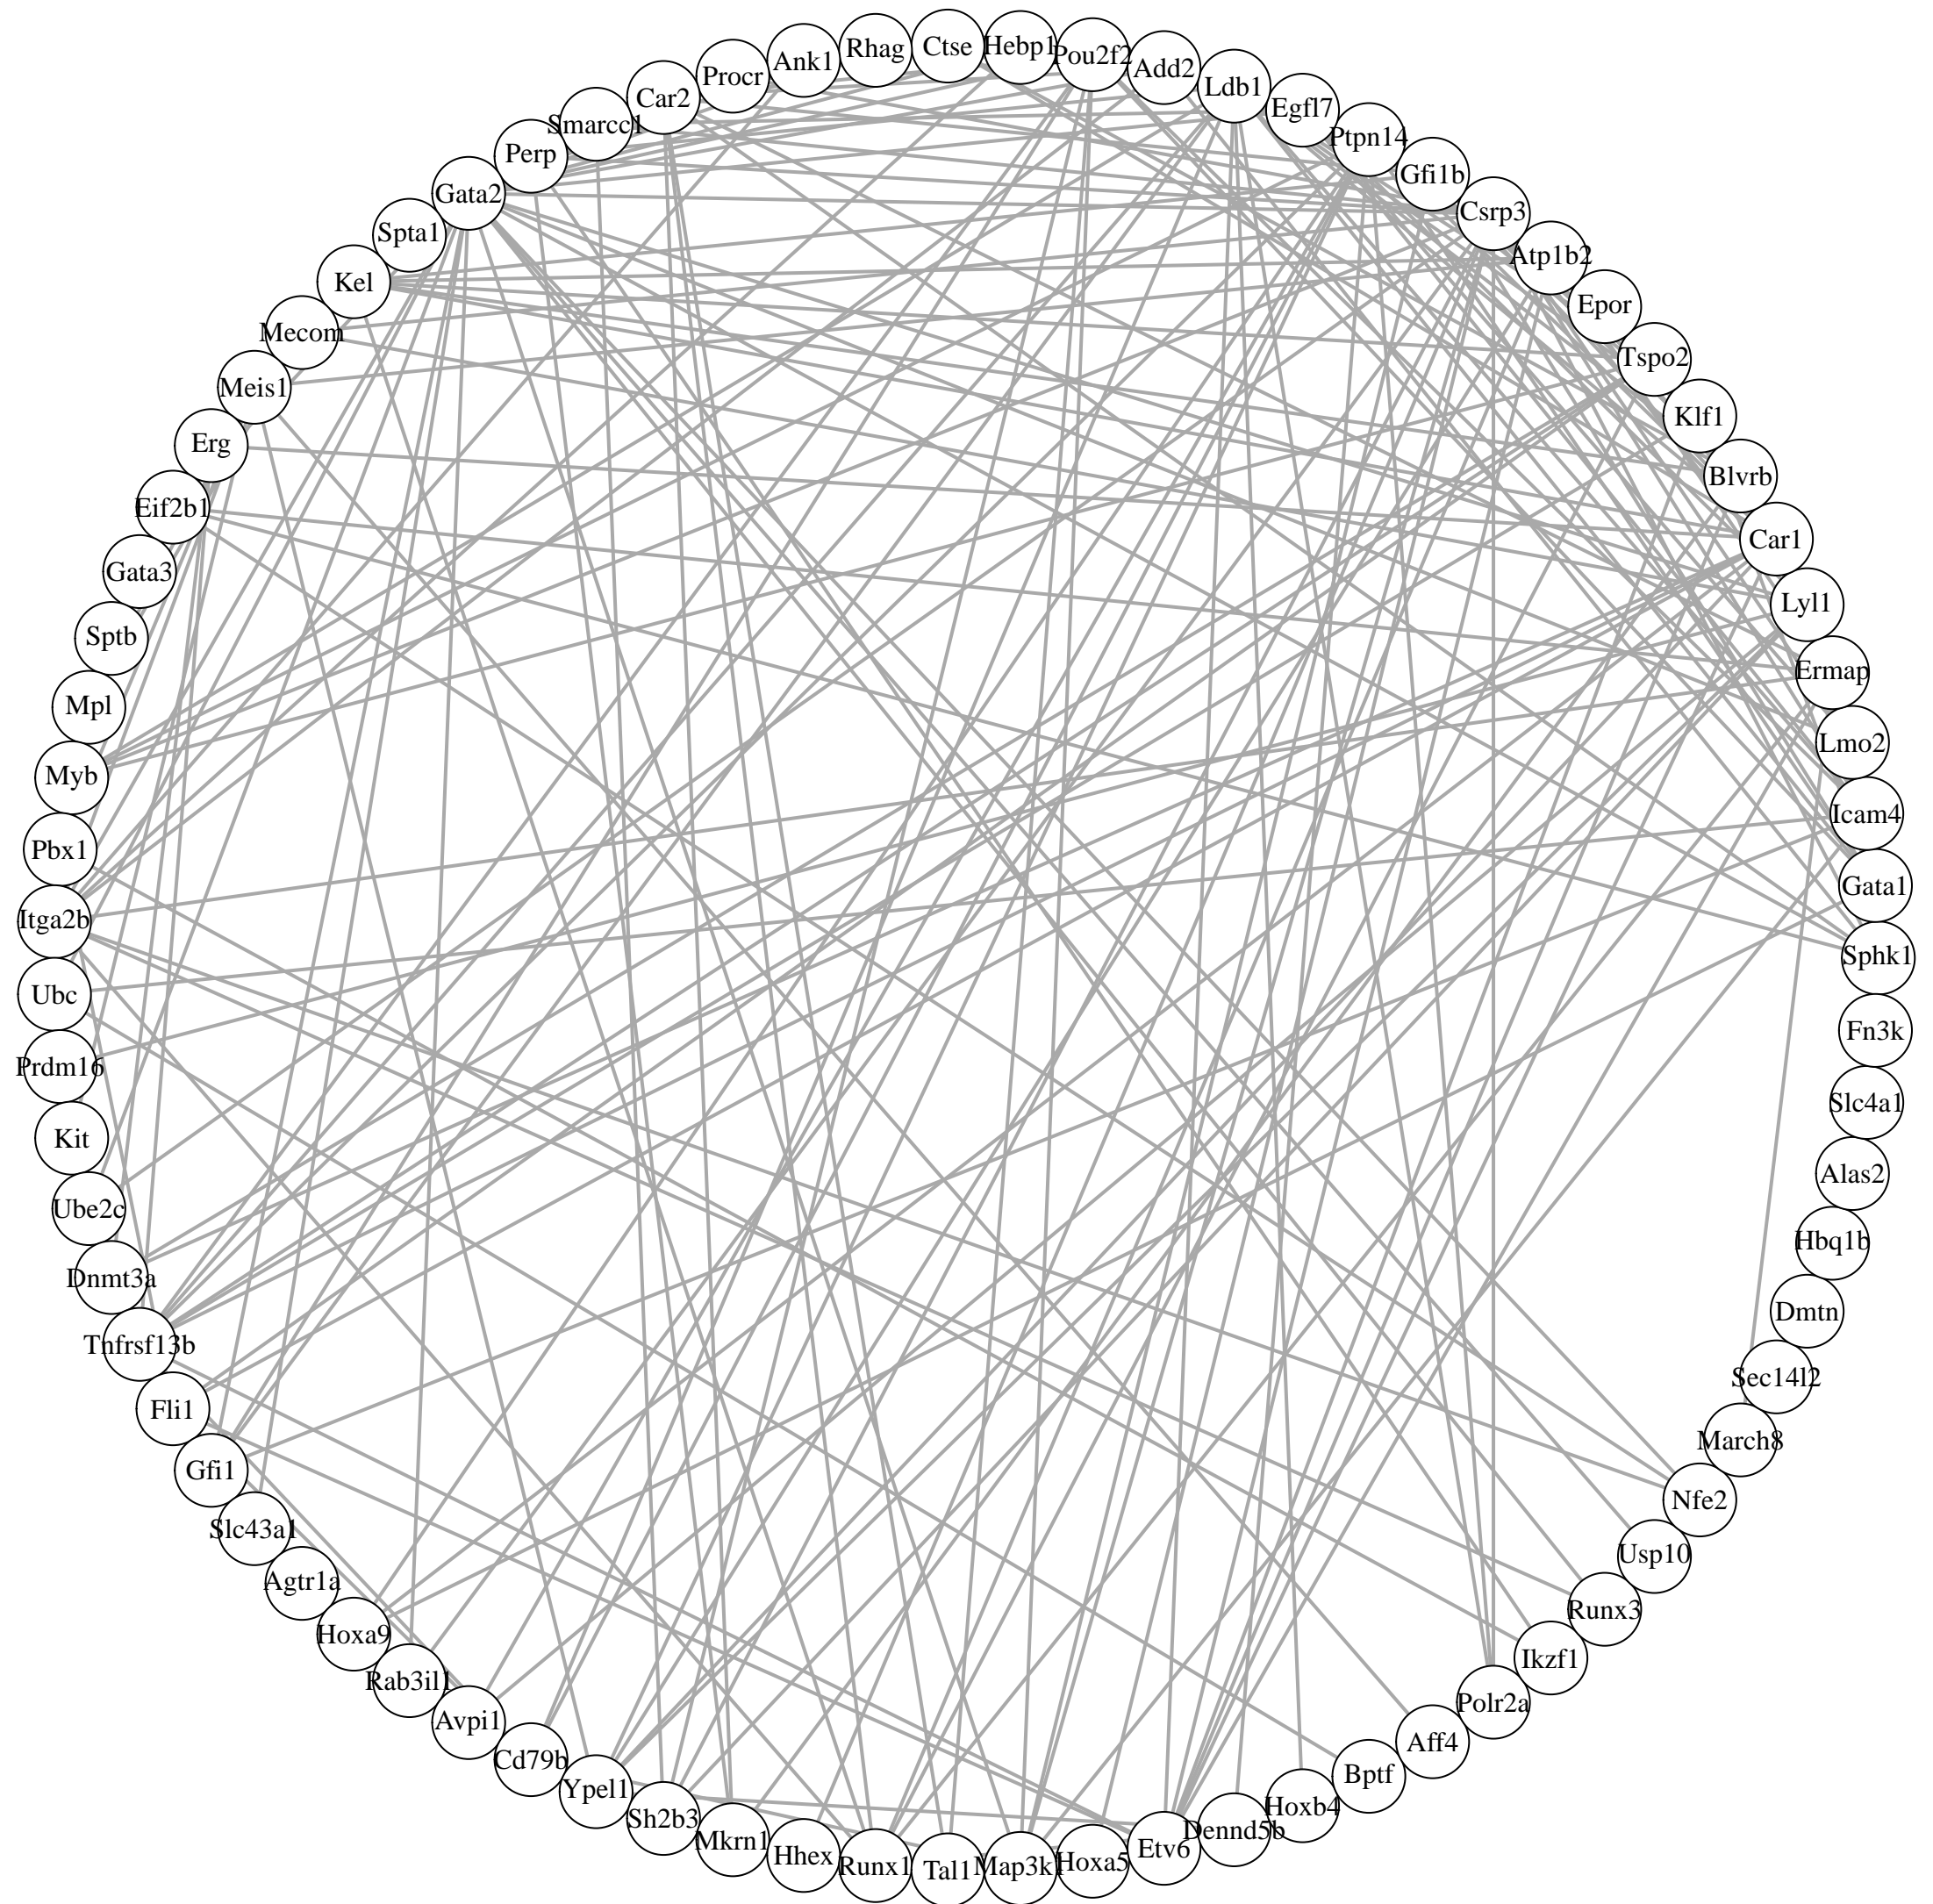

mouse\_HSCtoMEP\_time 16

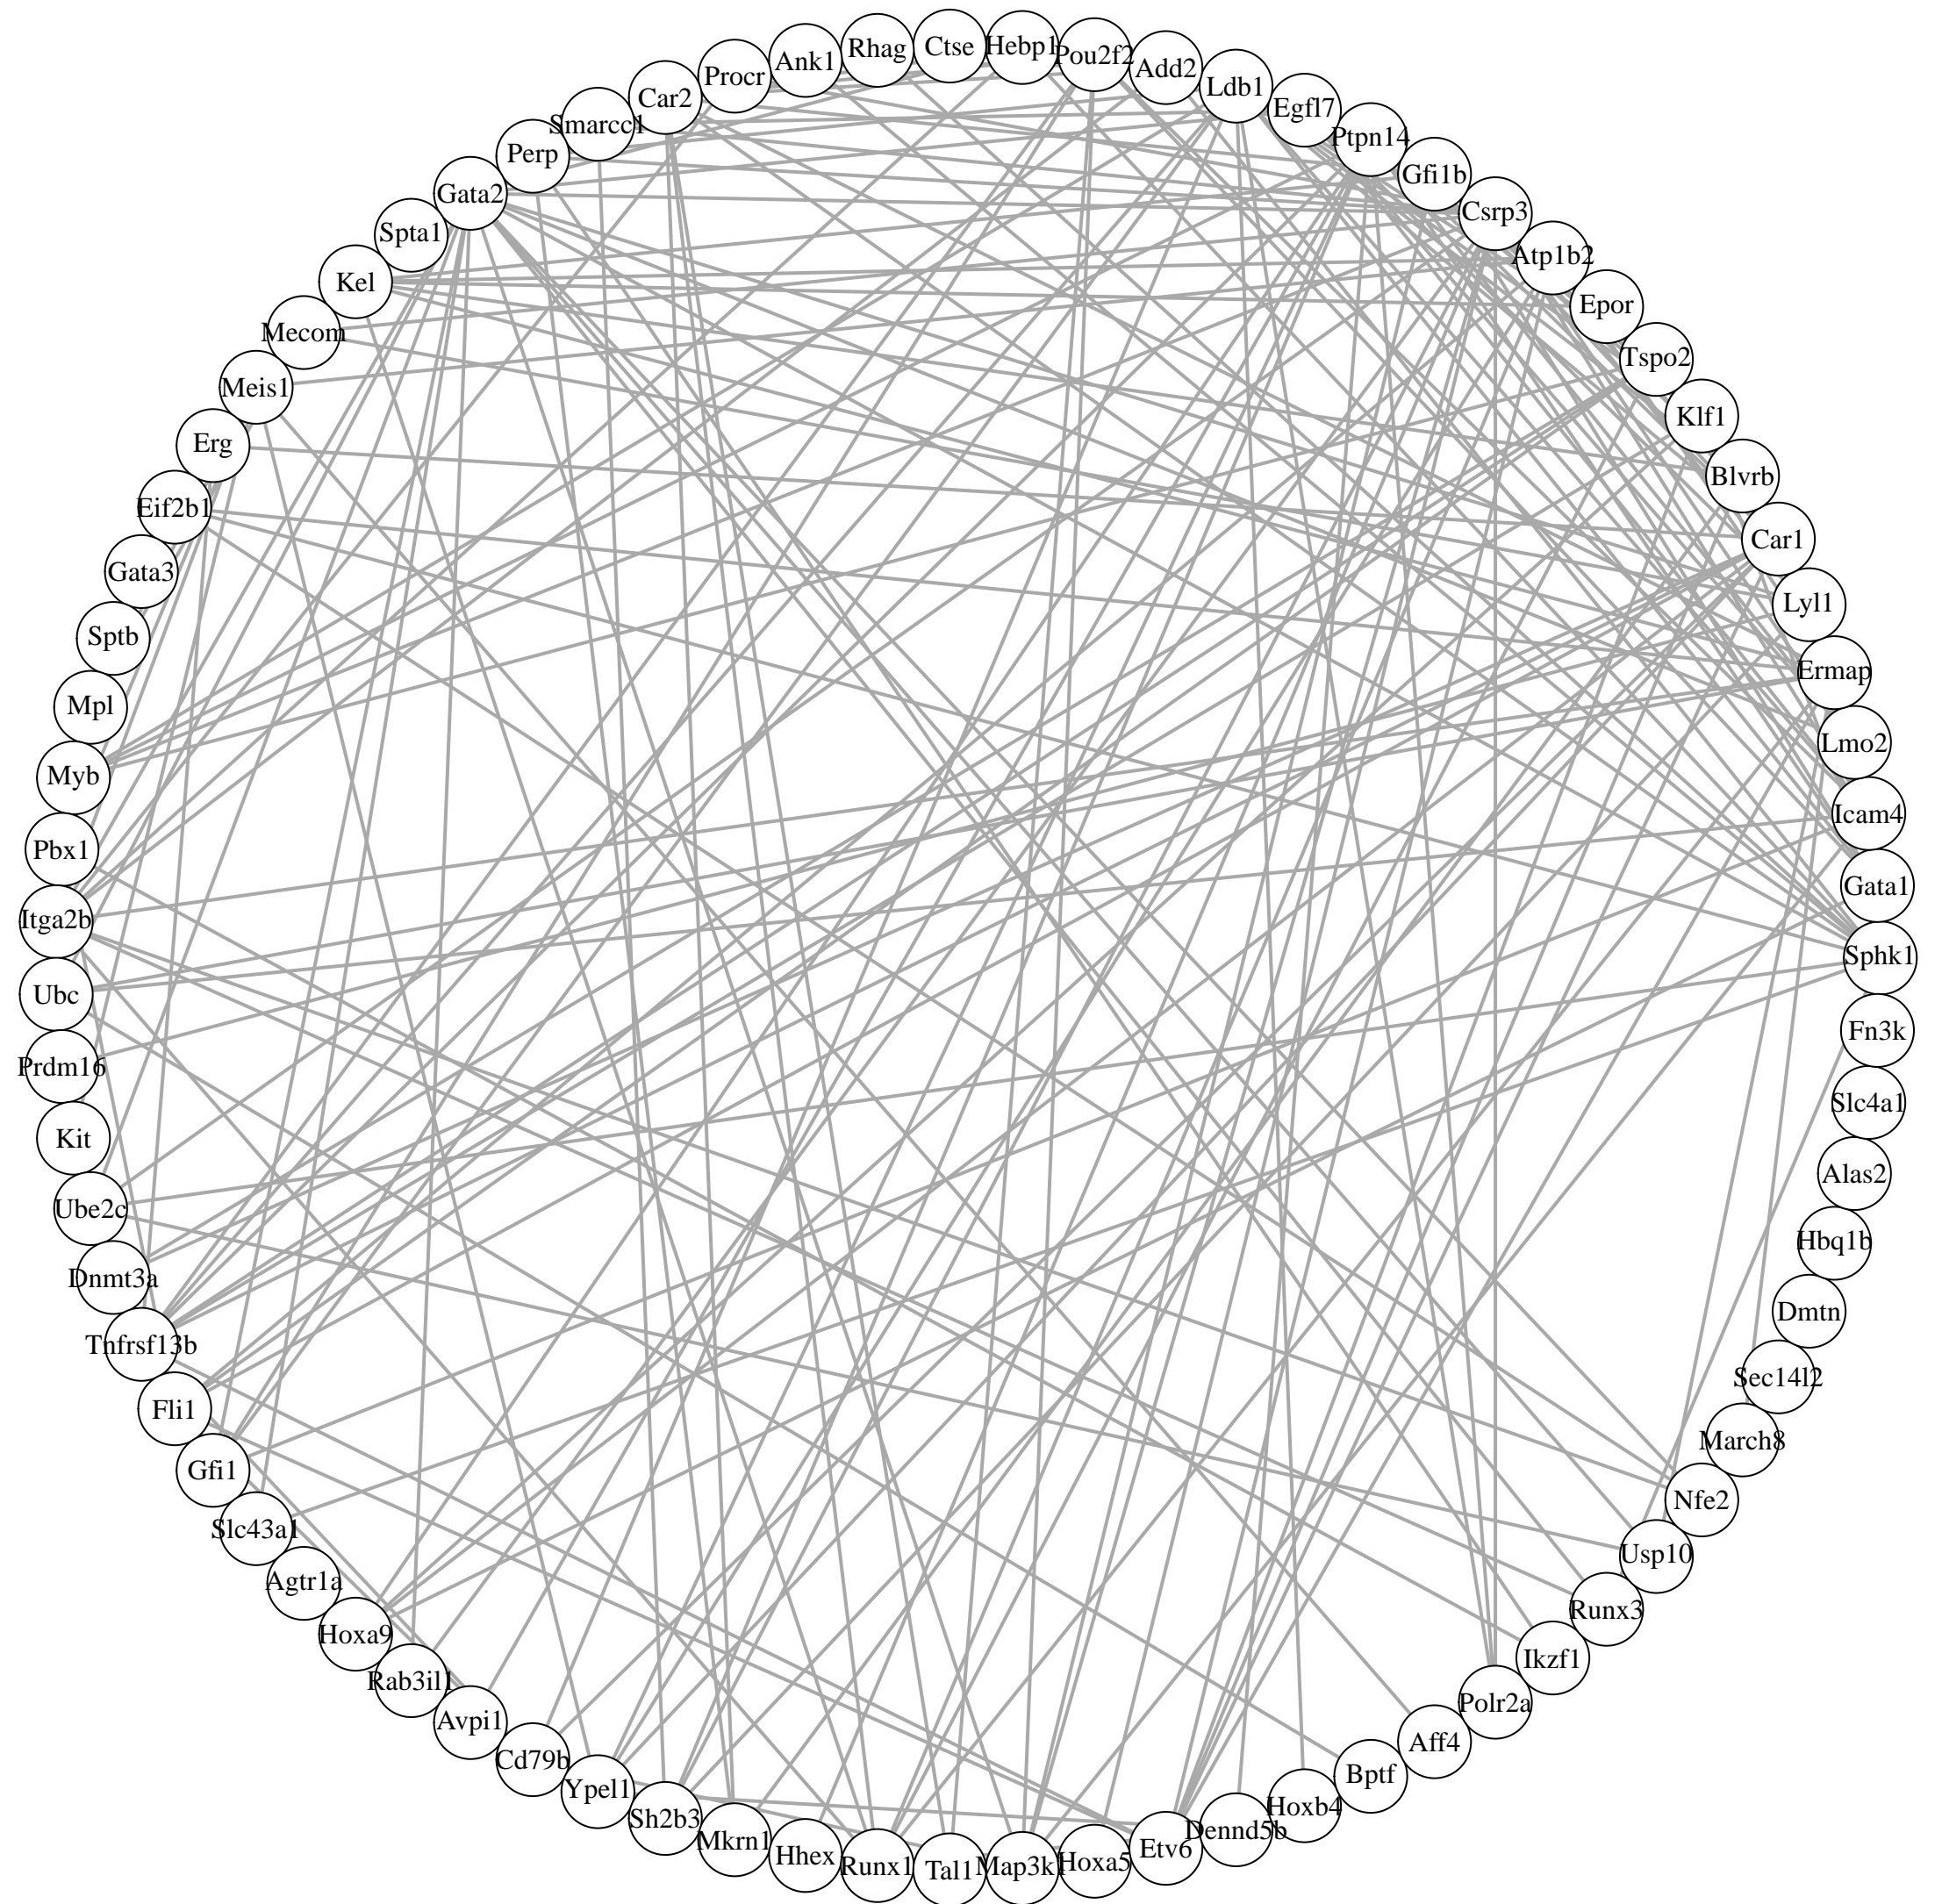

mouse\_HSCtoMEP\_time 17

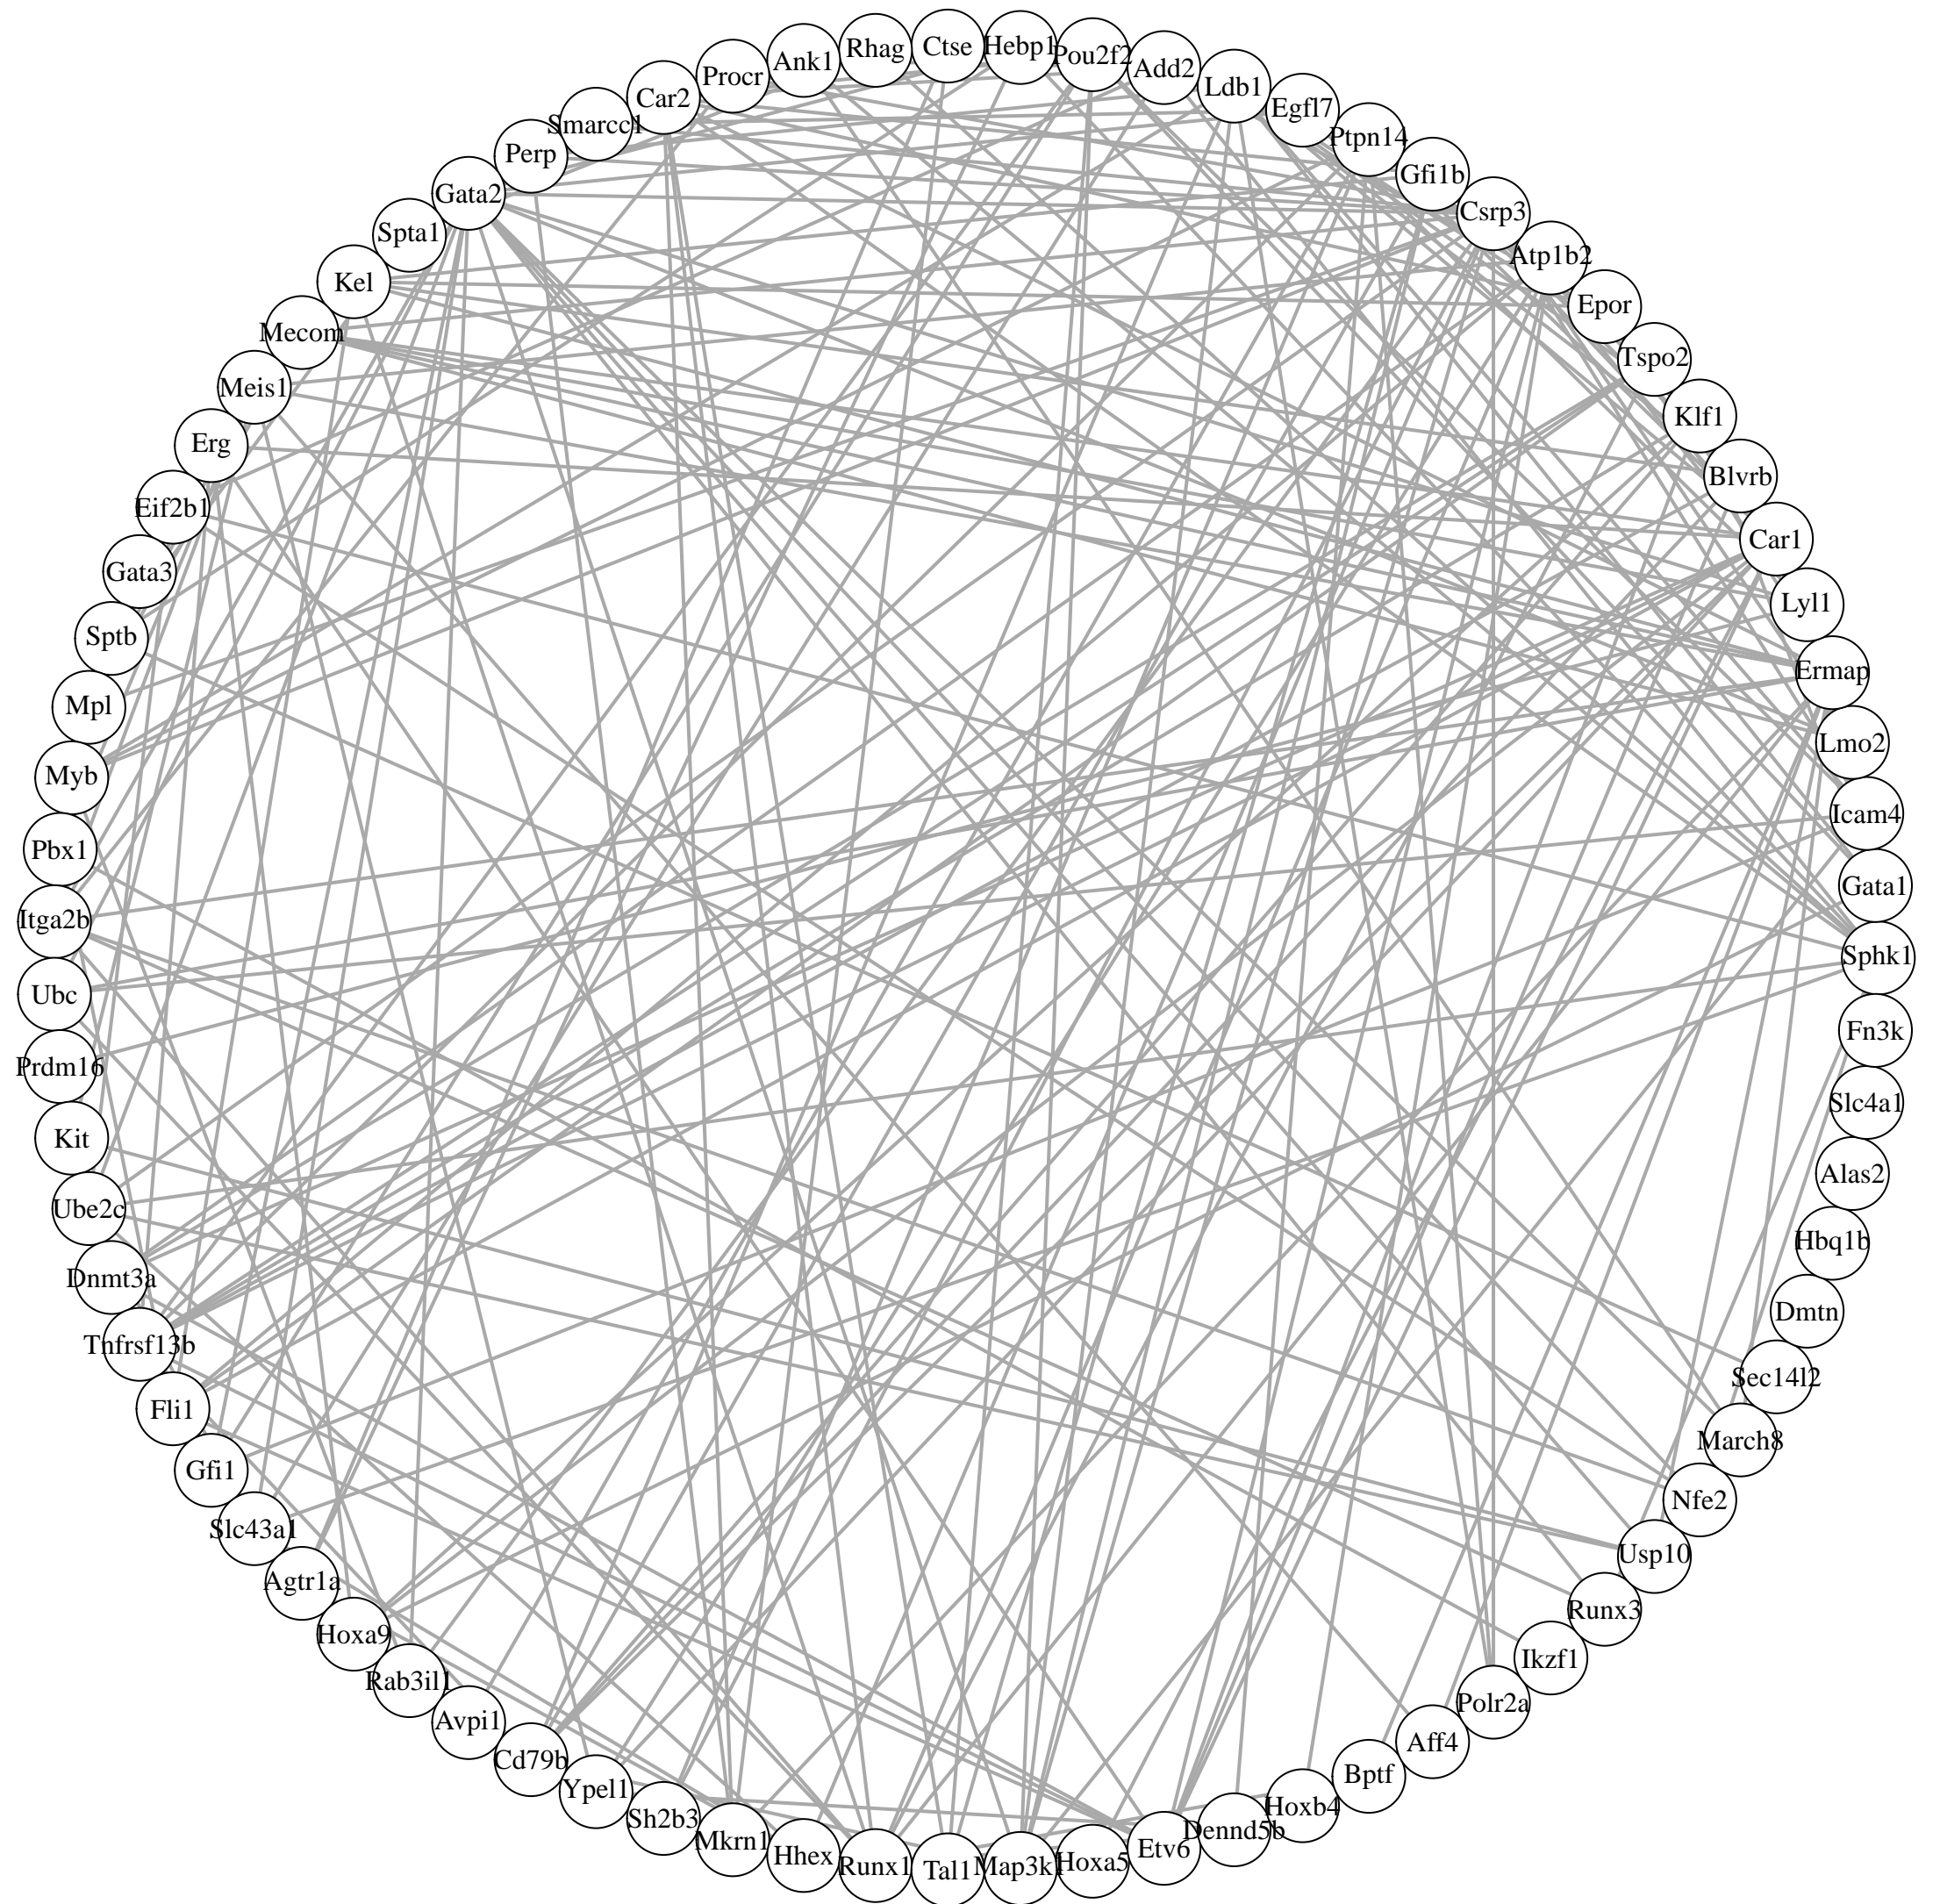



mouse\_HSCtoMEP\_time 18

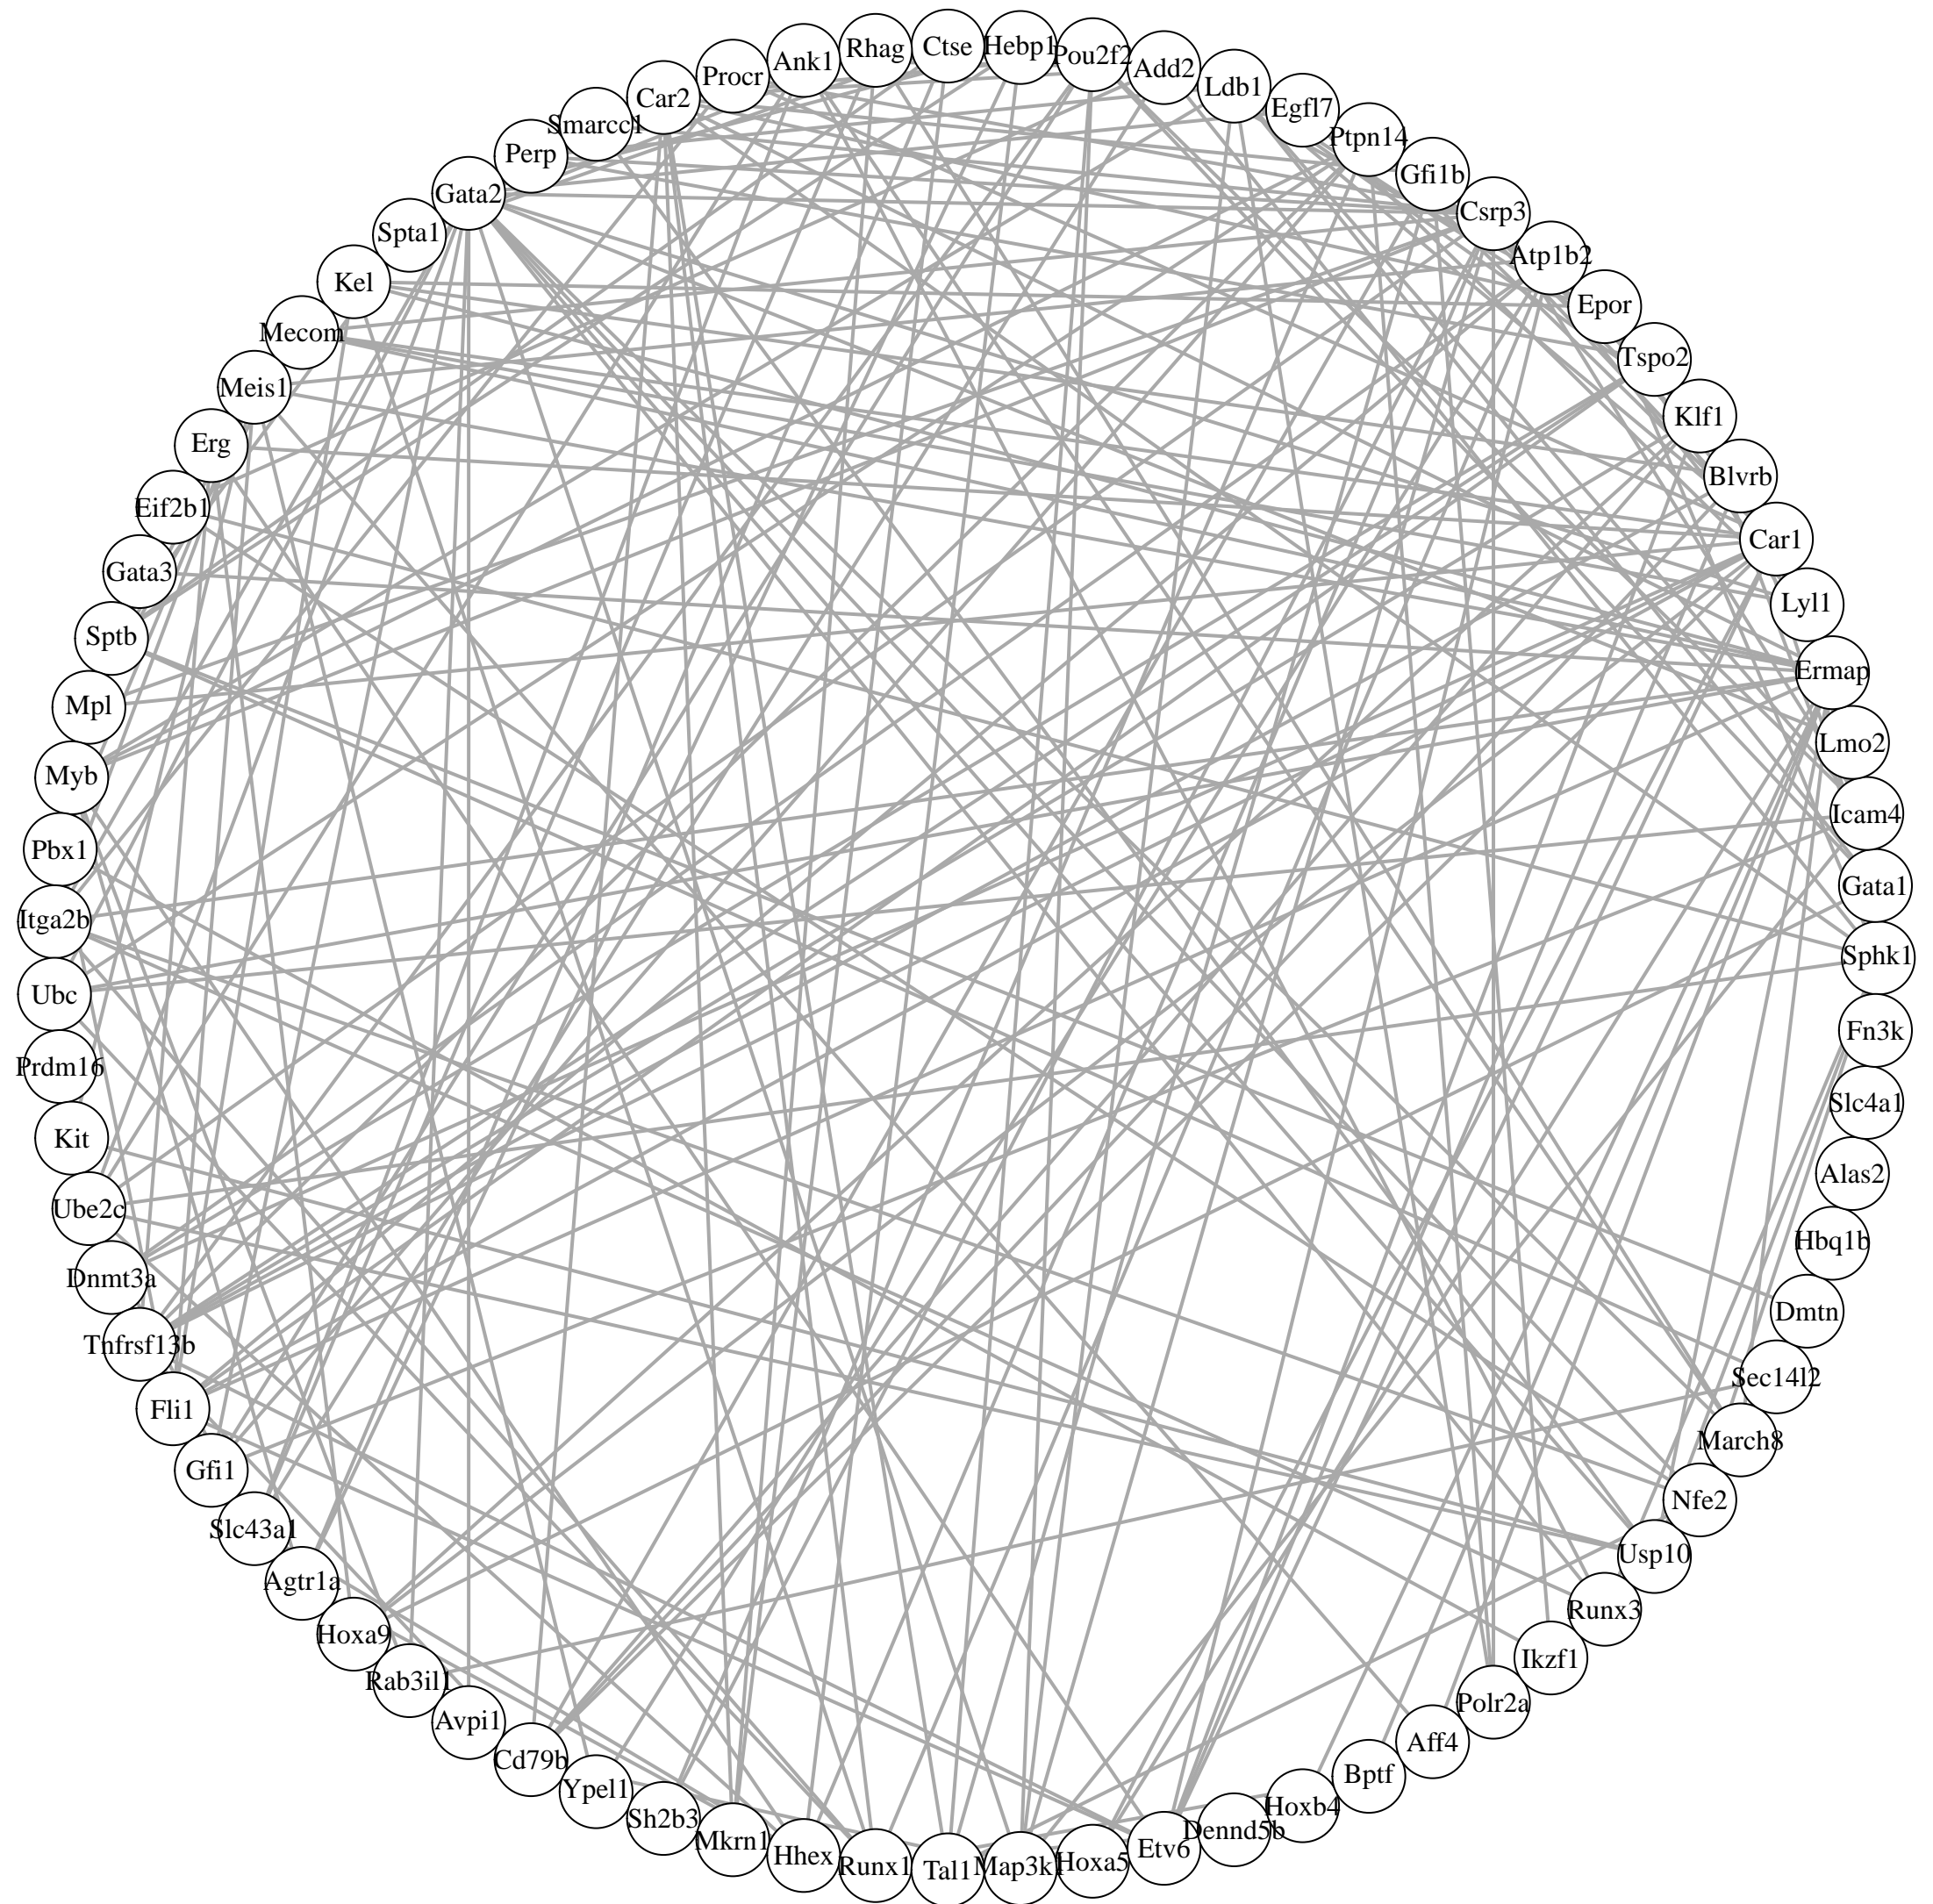



mouse\_HSCtoMEP\_time 19

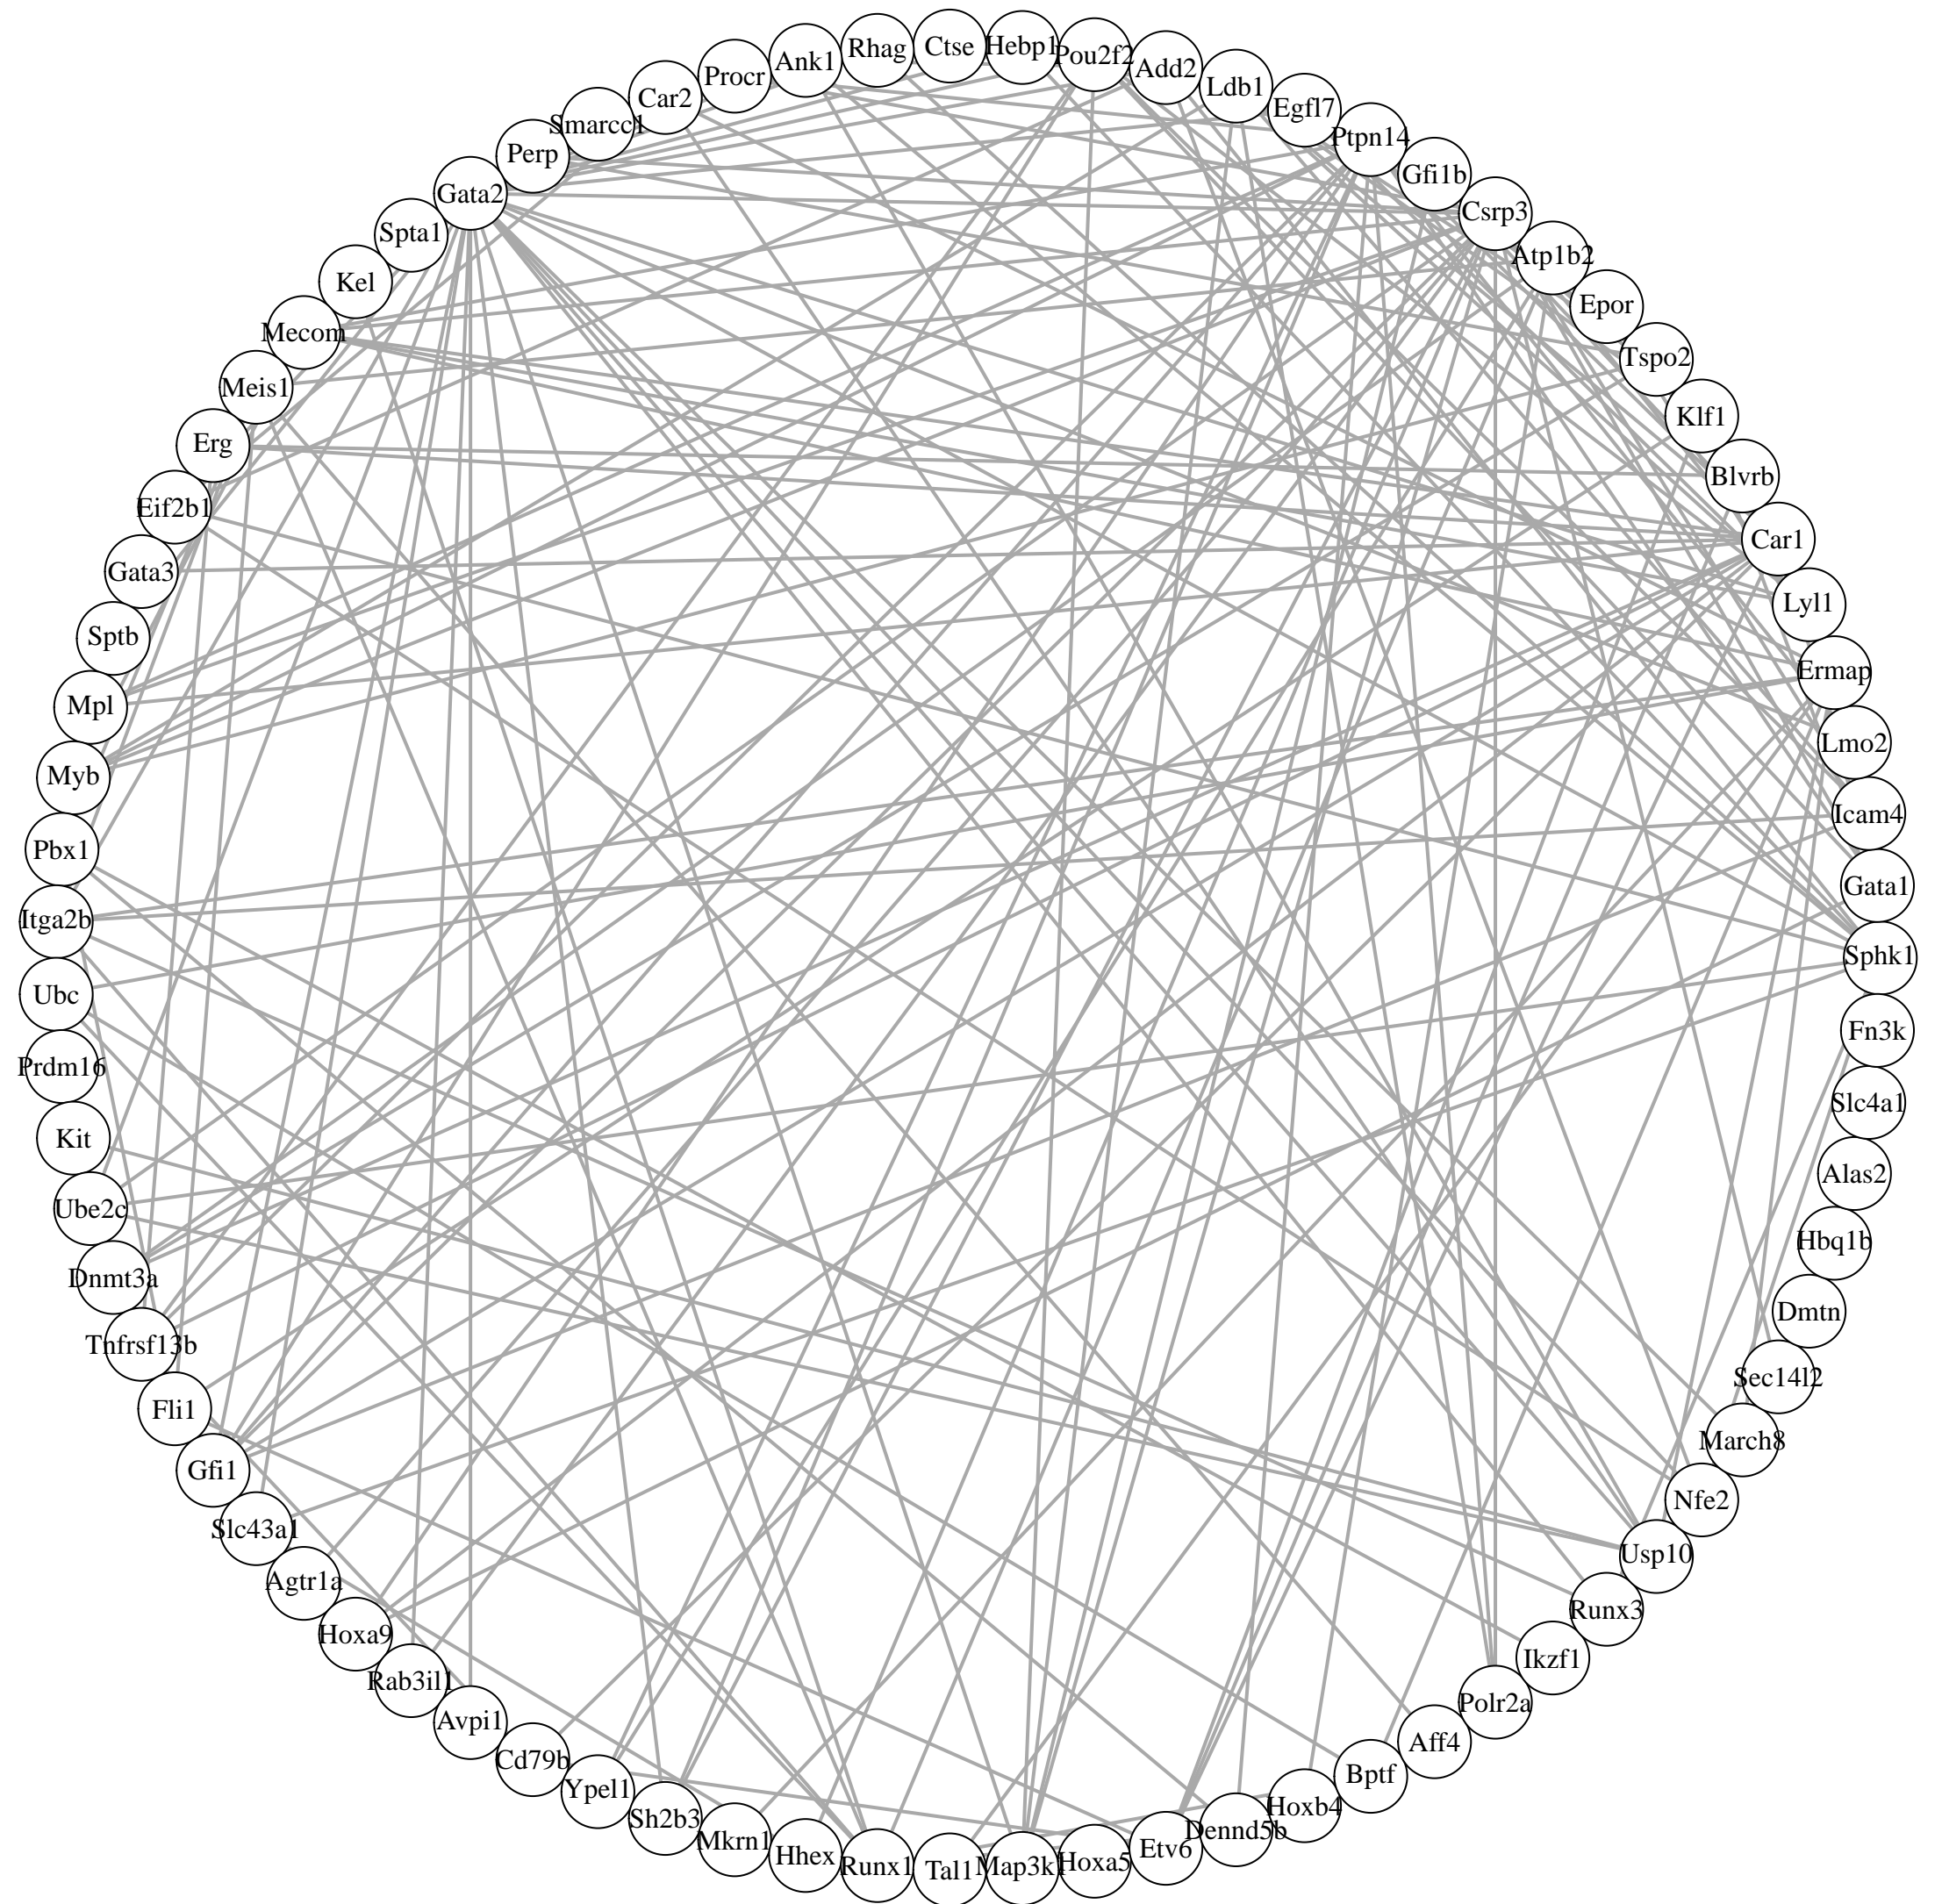

**mouse\_HSCtoMEP\_time 20**

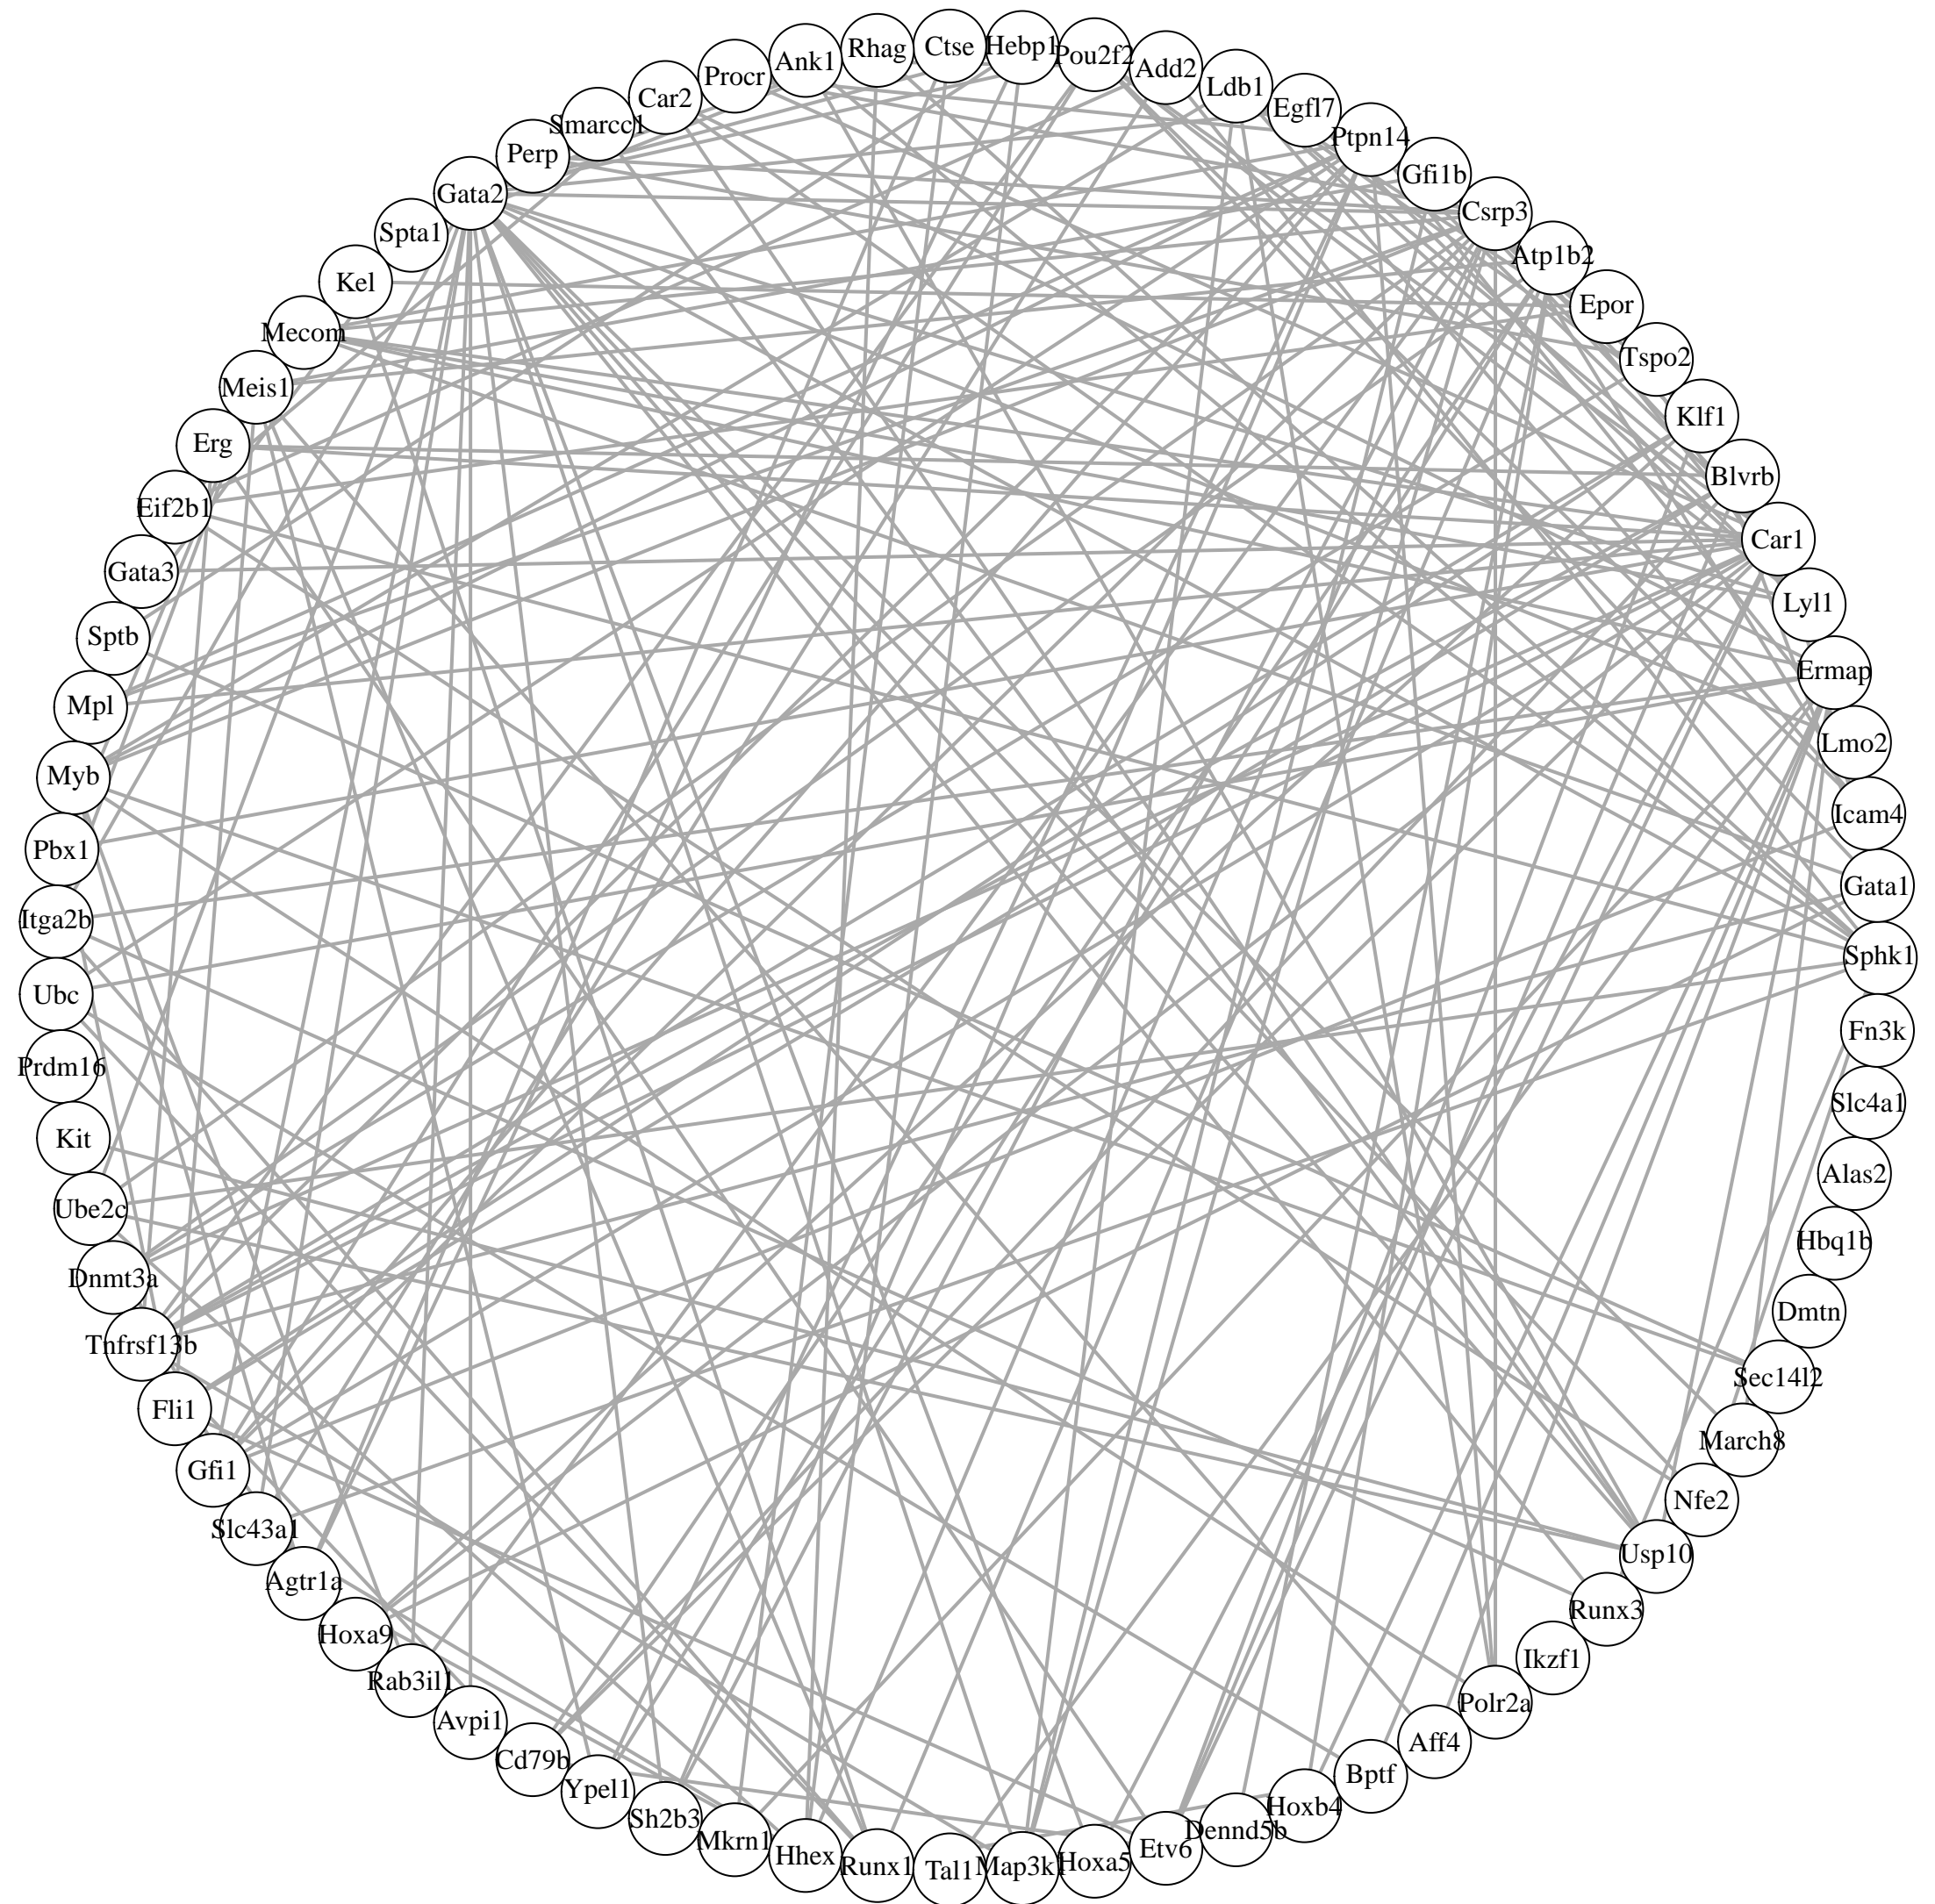

mouse\_HSCtoMEP\_time 21

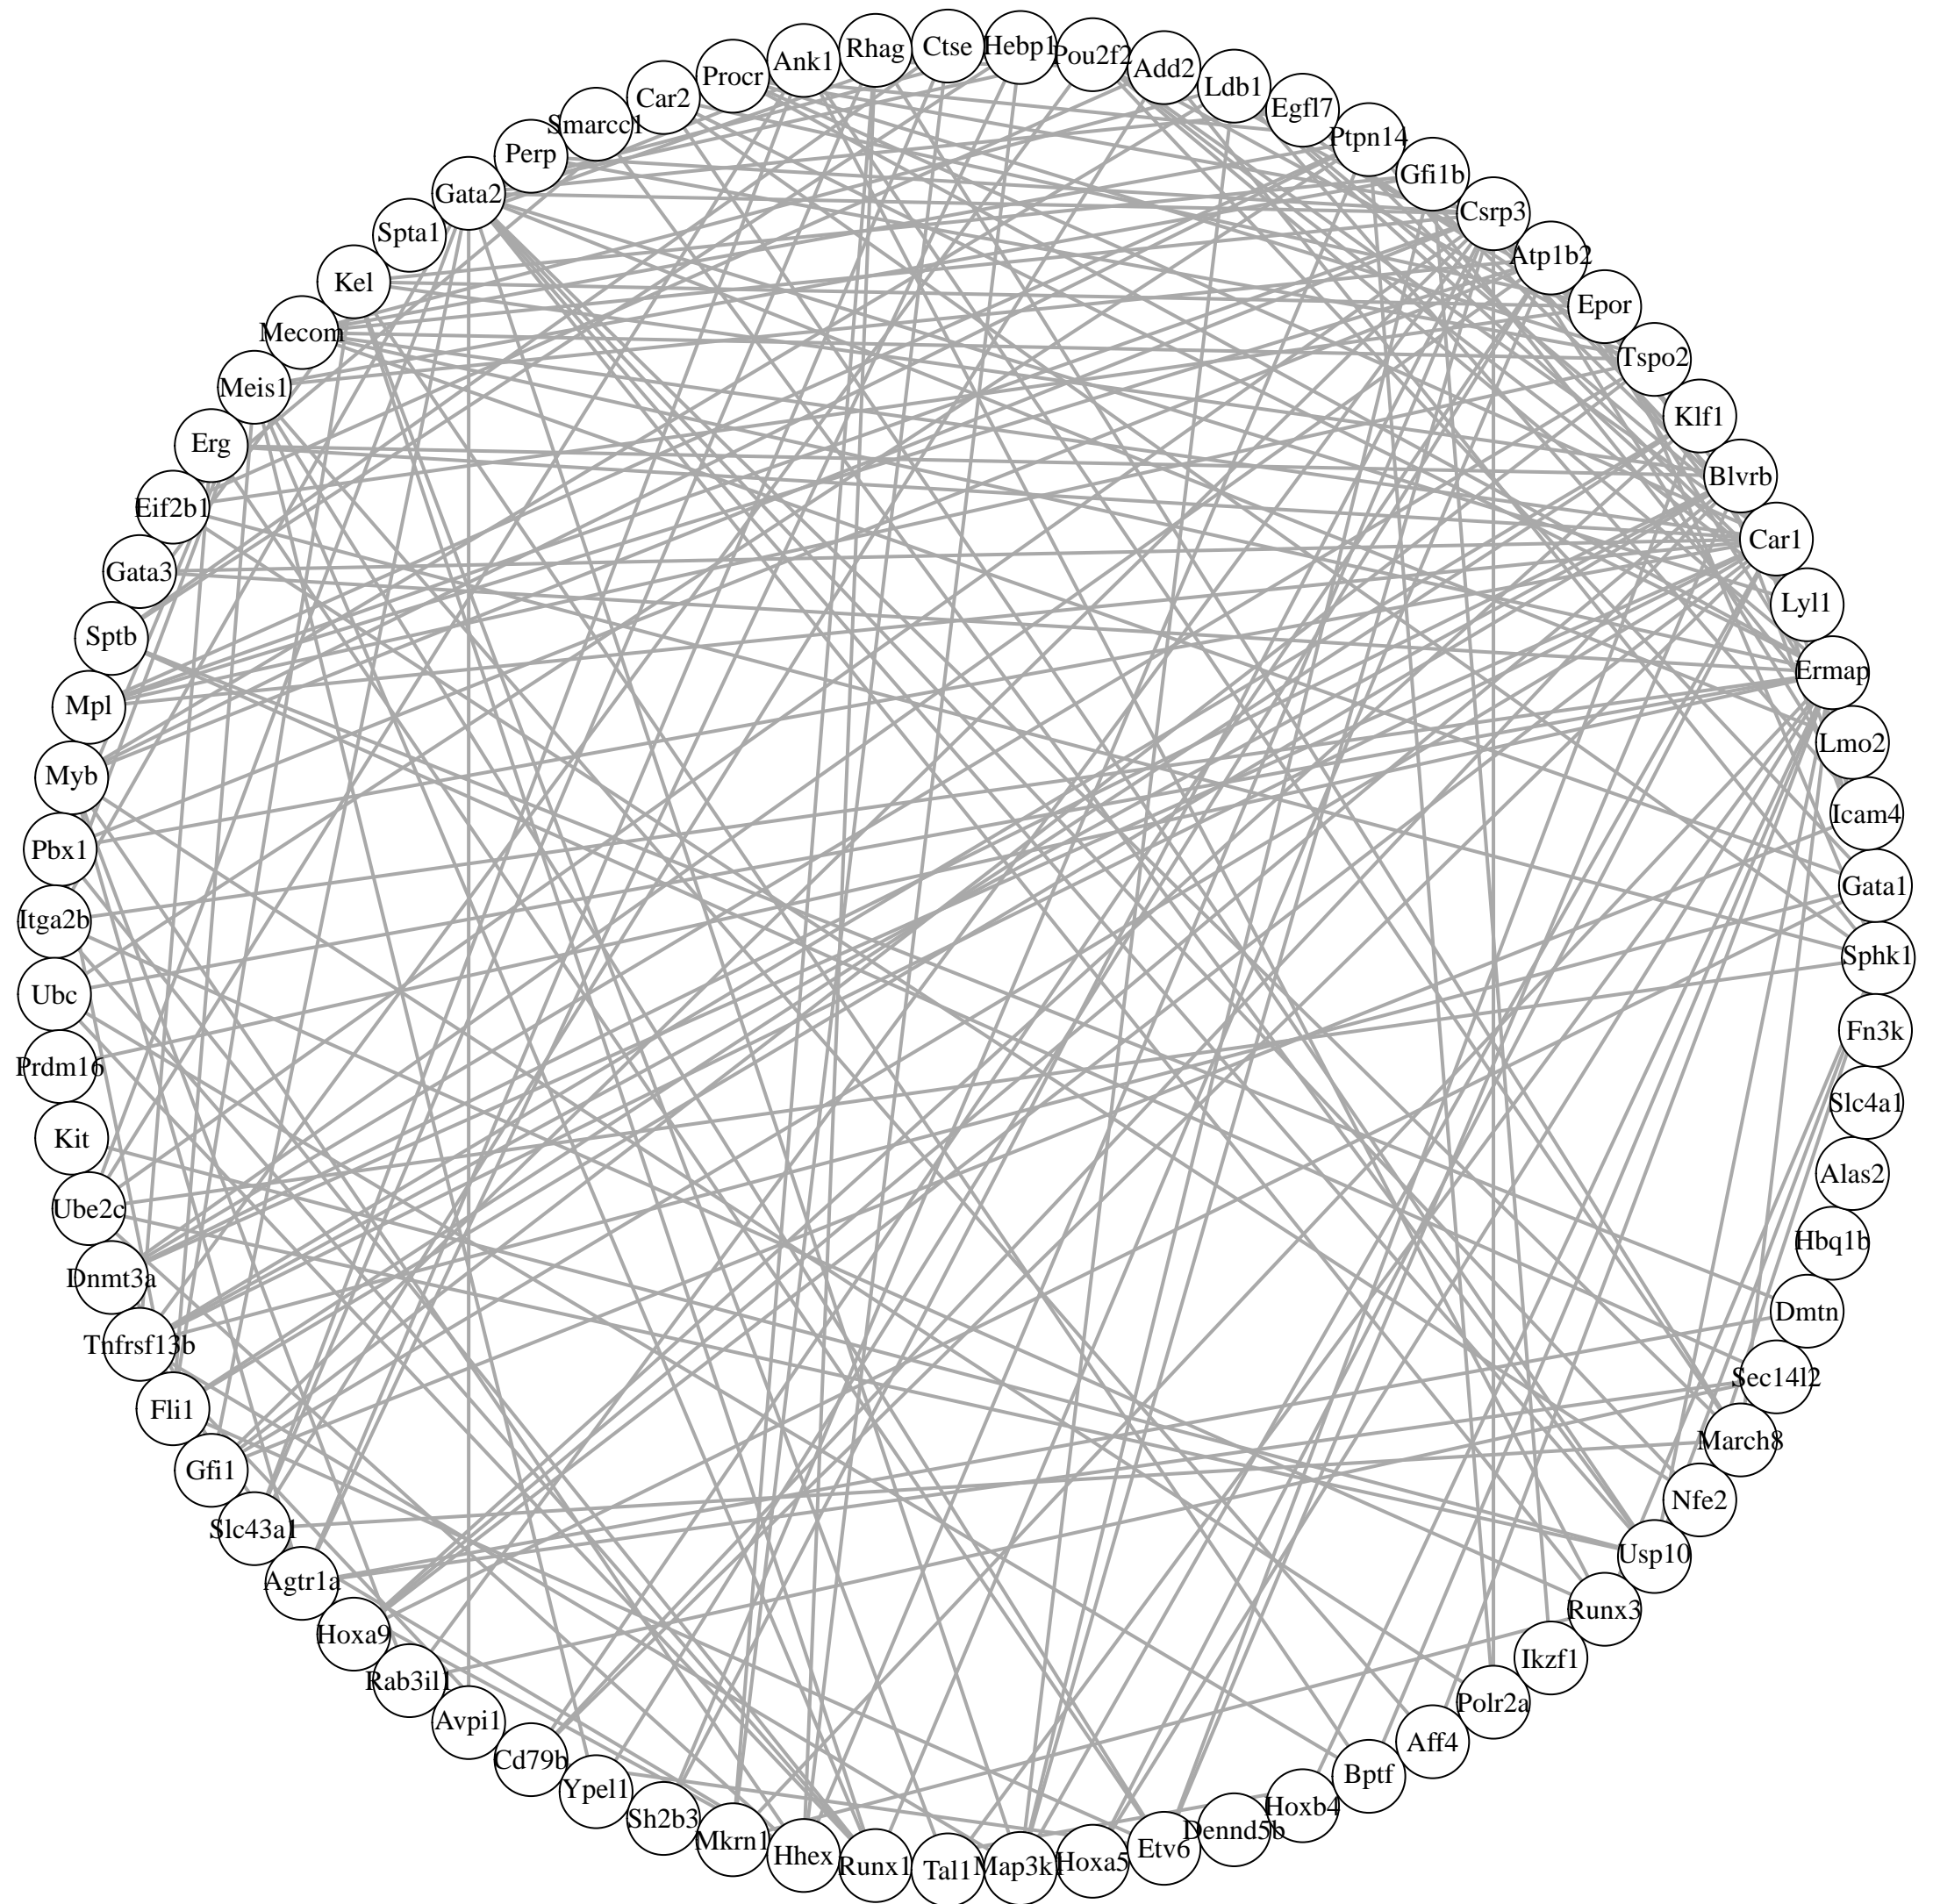

mouse\_HSCtoMEP\_time 22

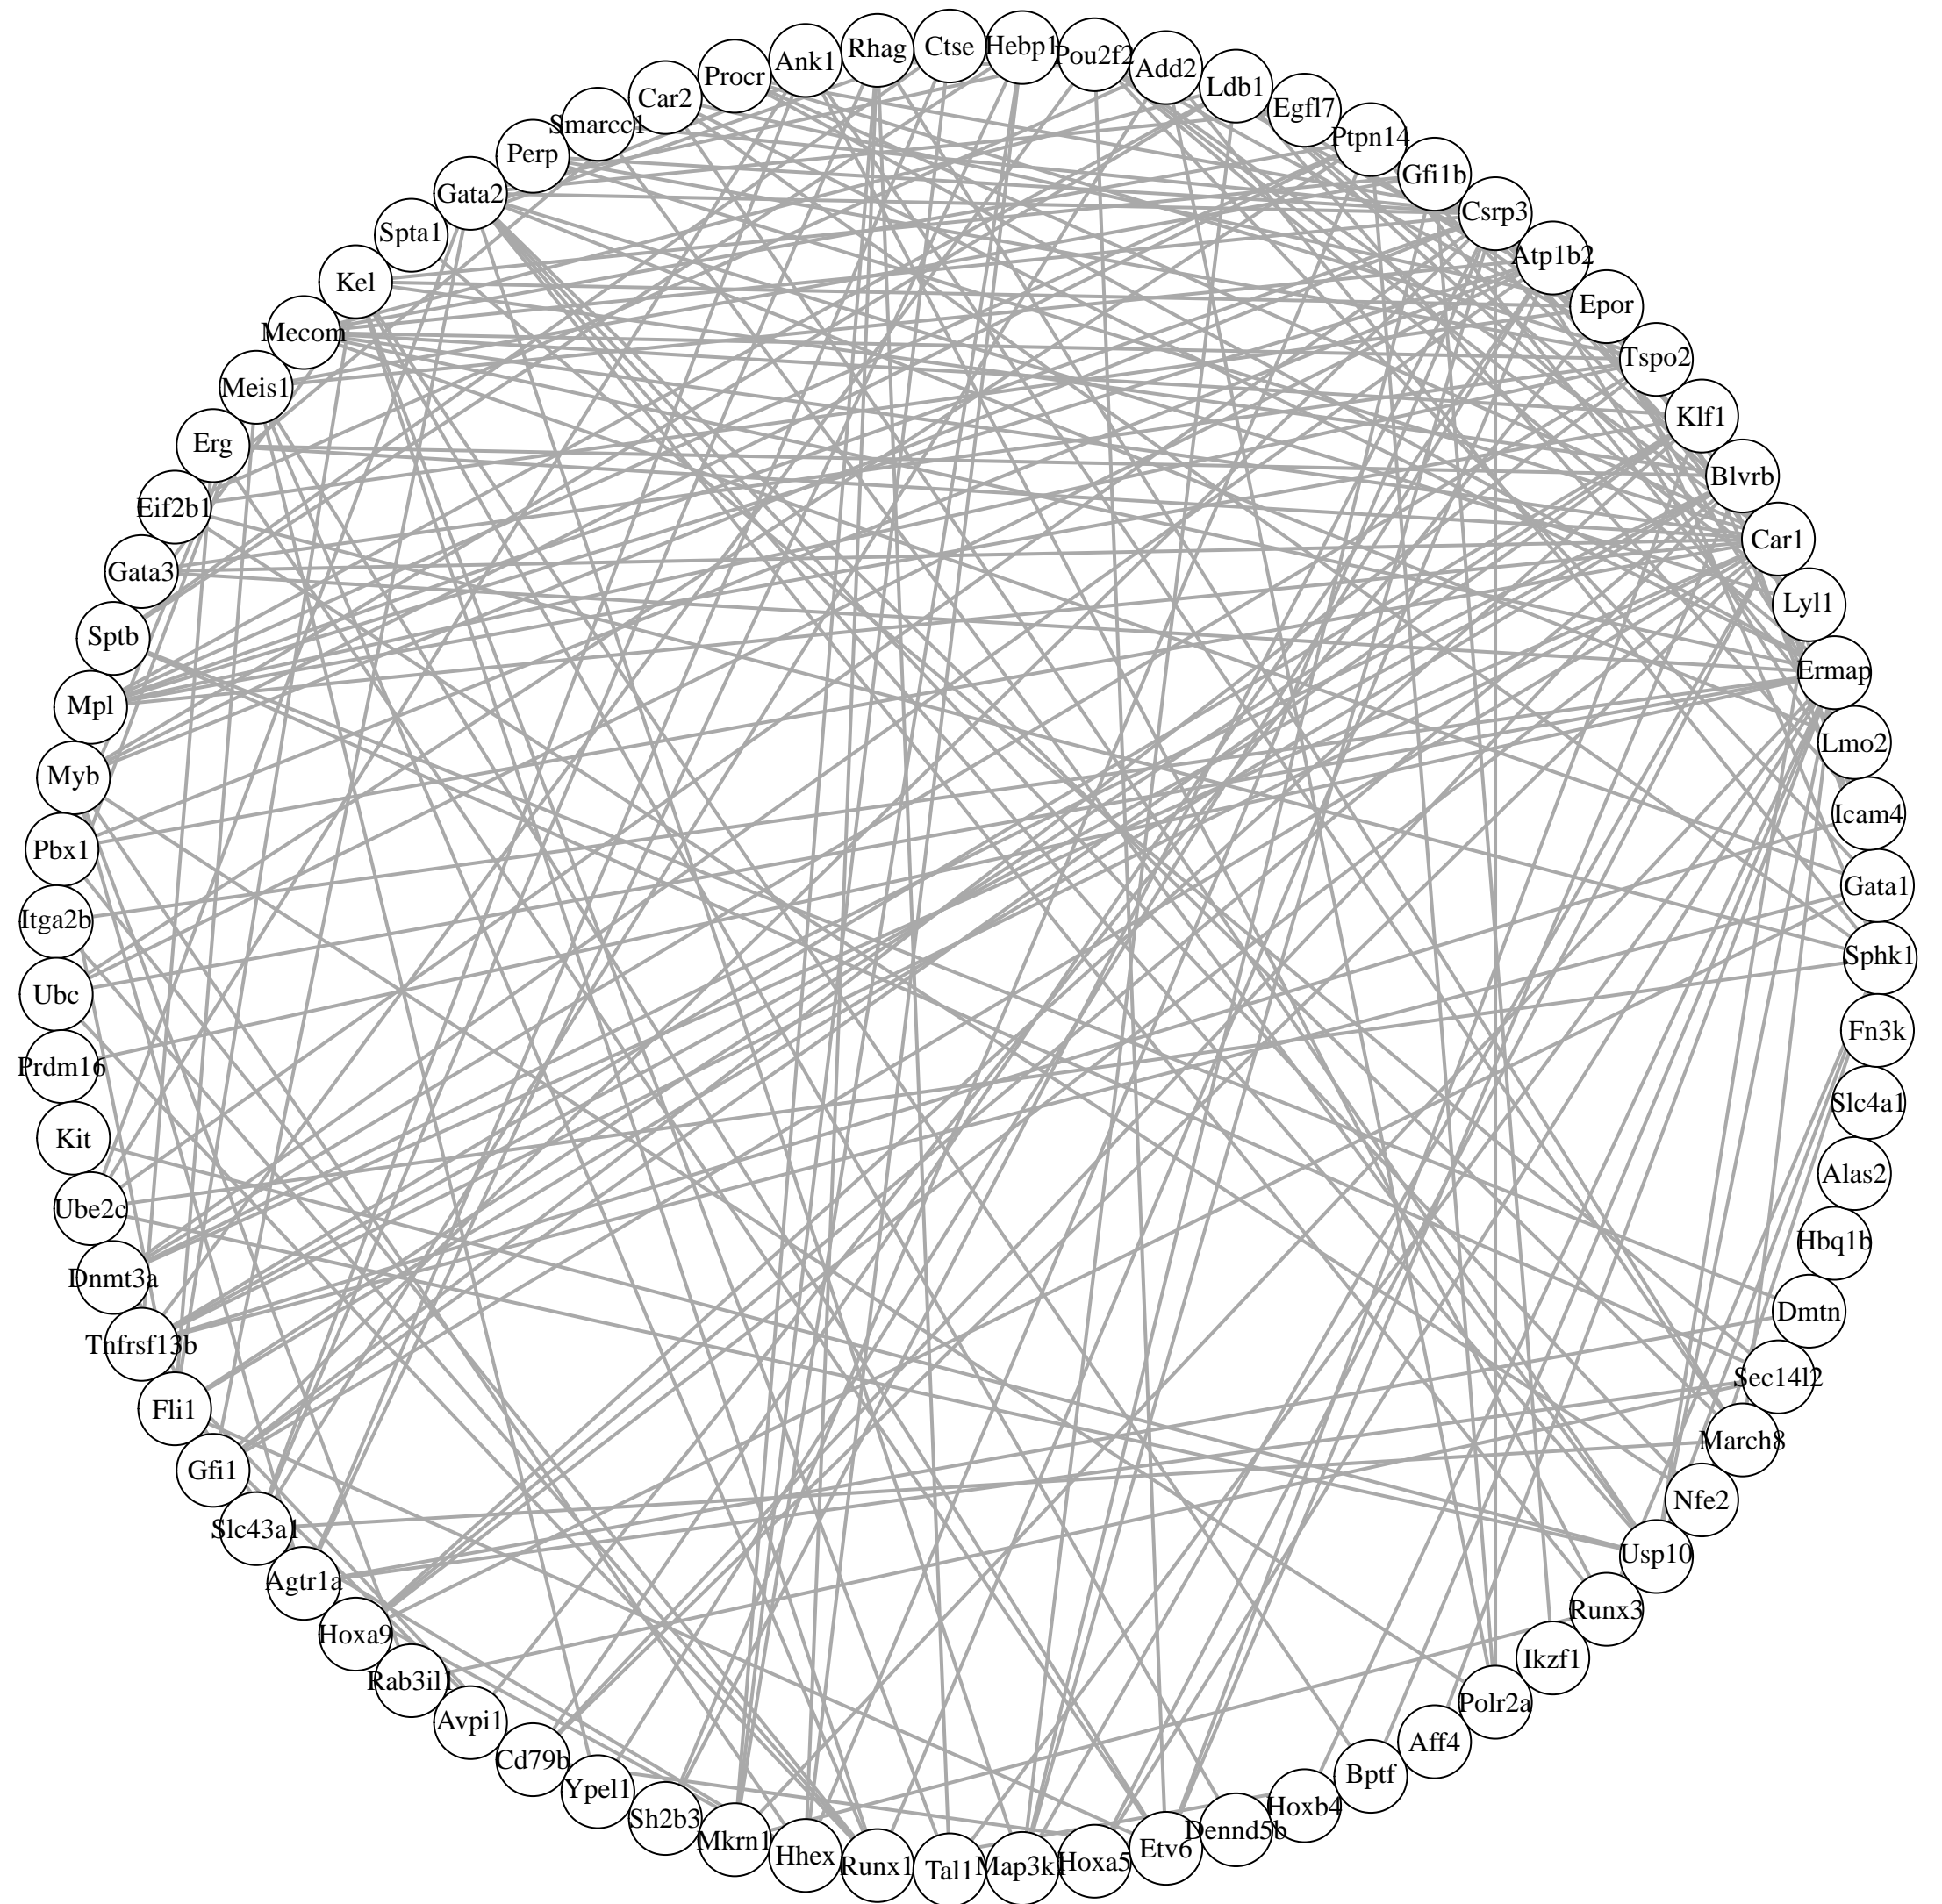



mouse\_HSCtoMEP\_time 23

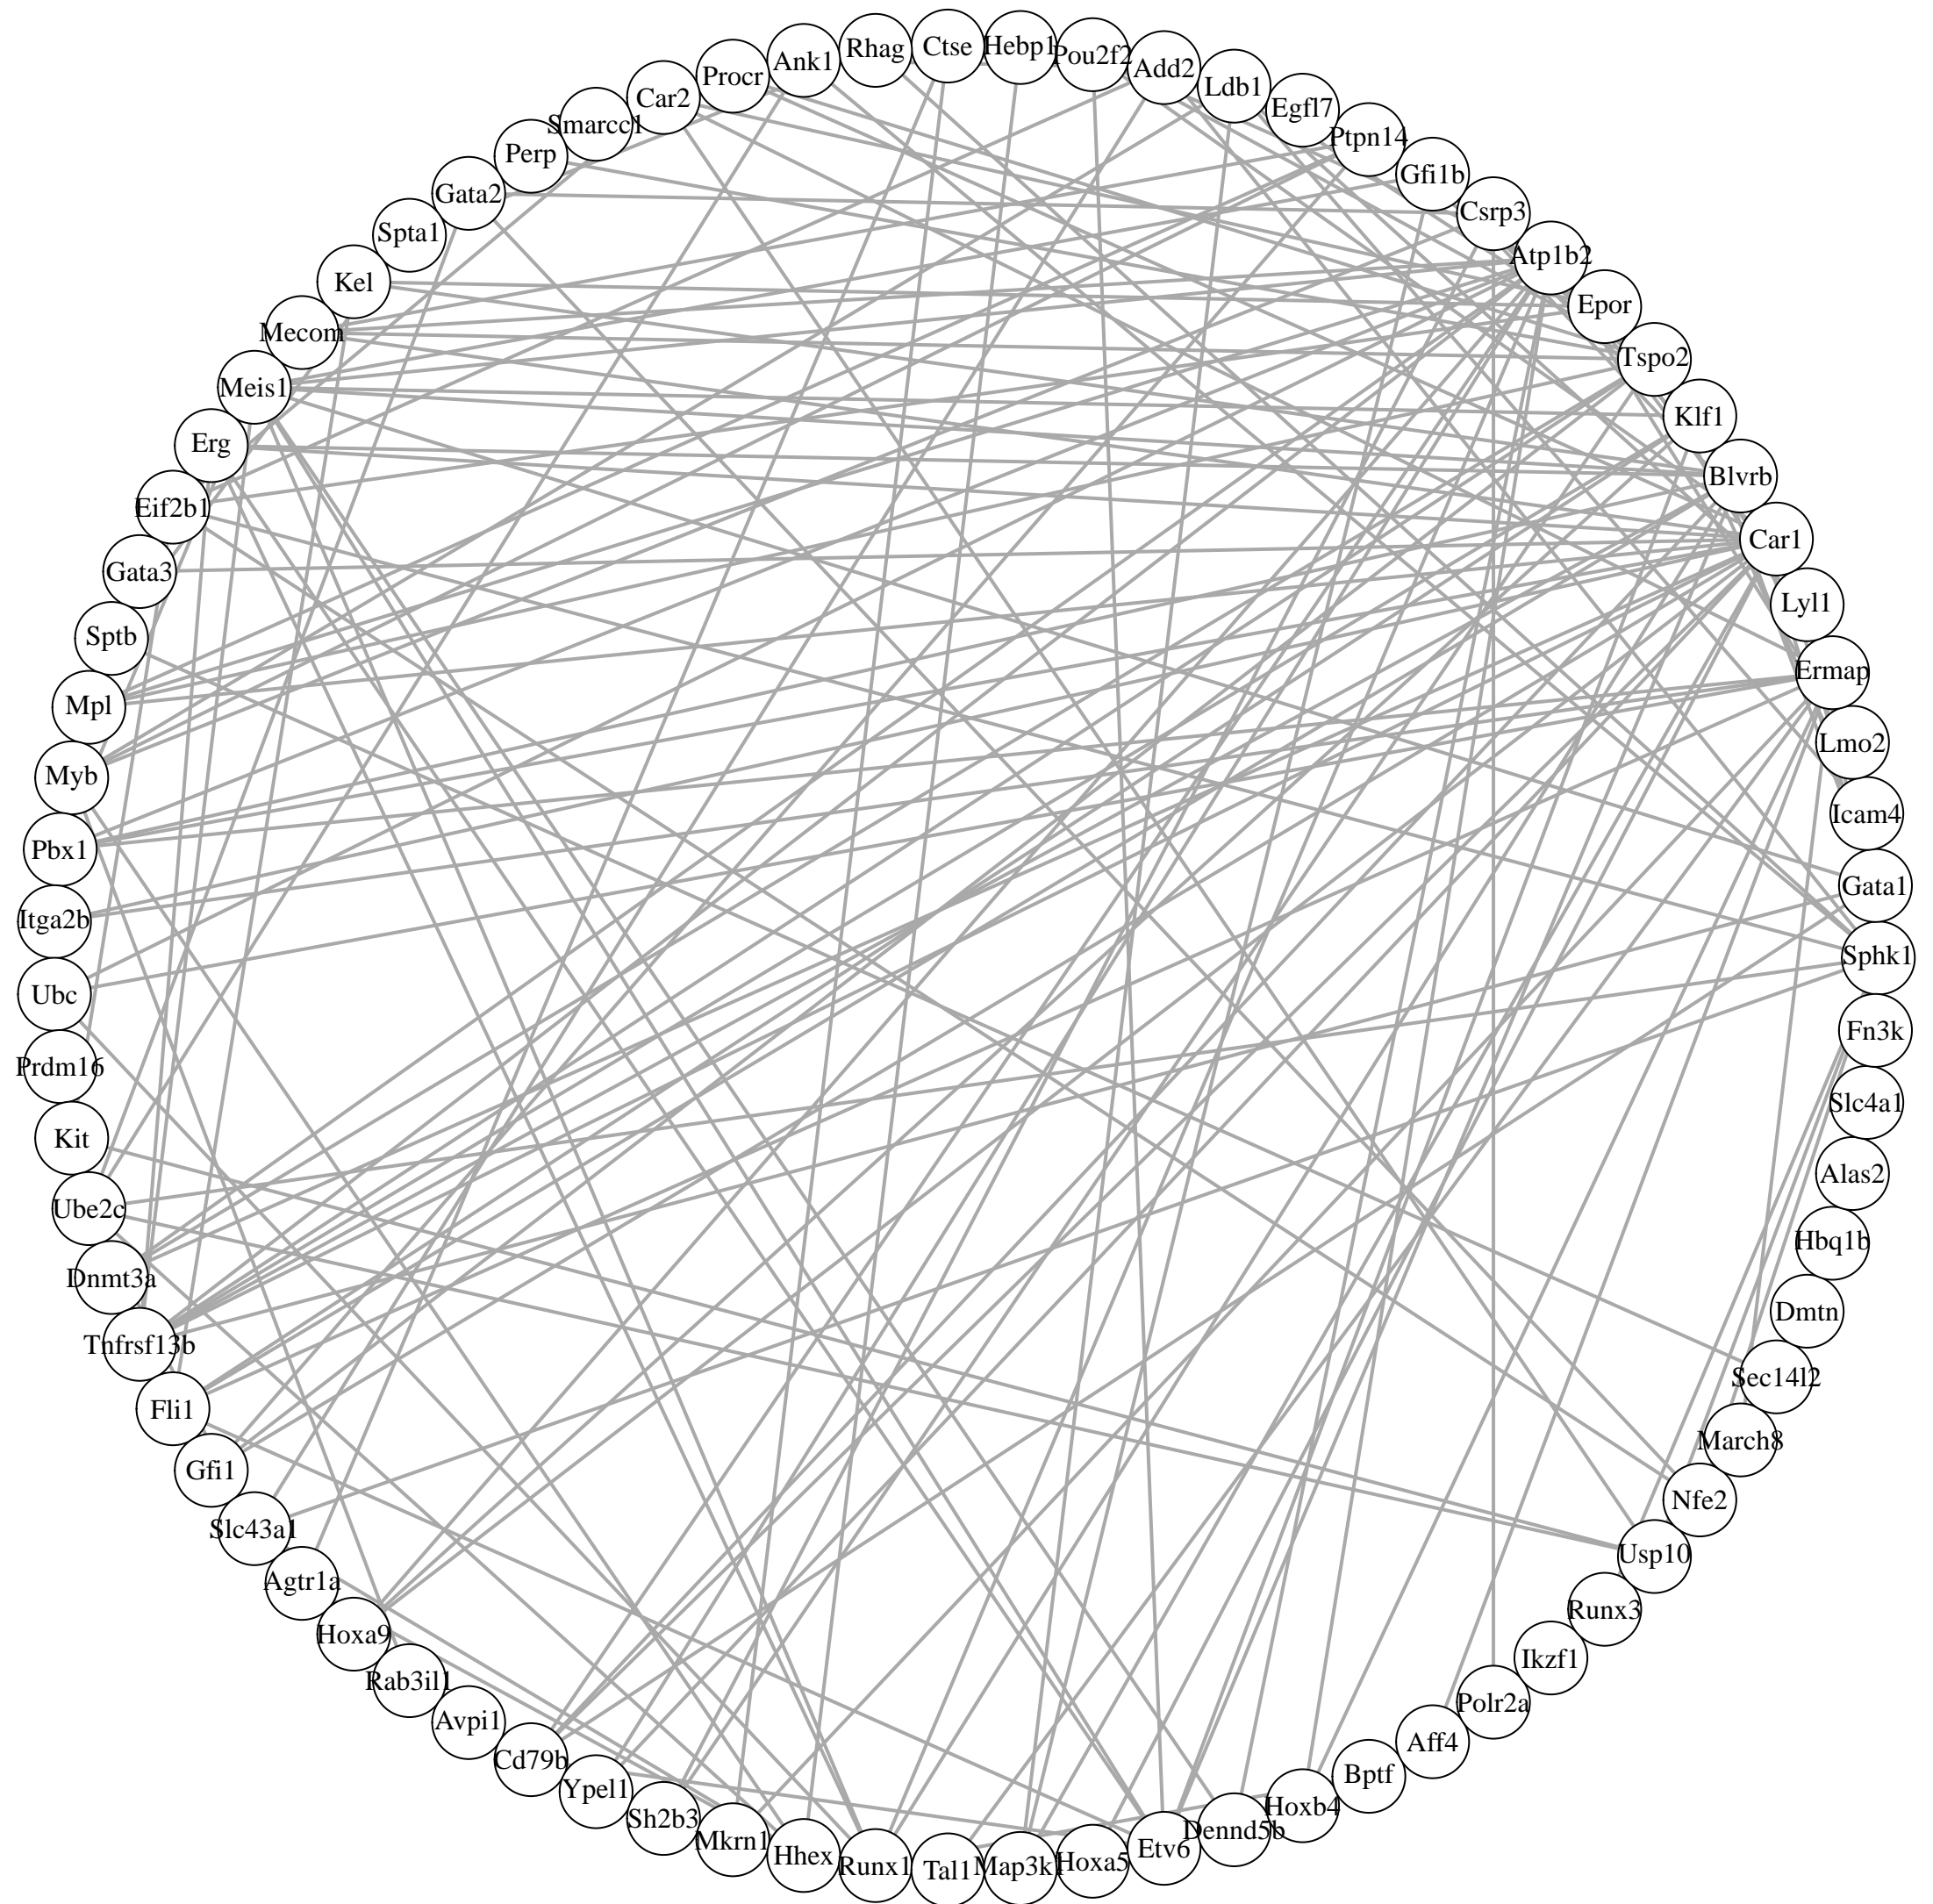



mouse\_HSCtoMEP\_time 24

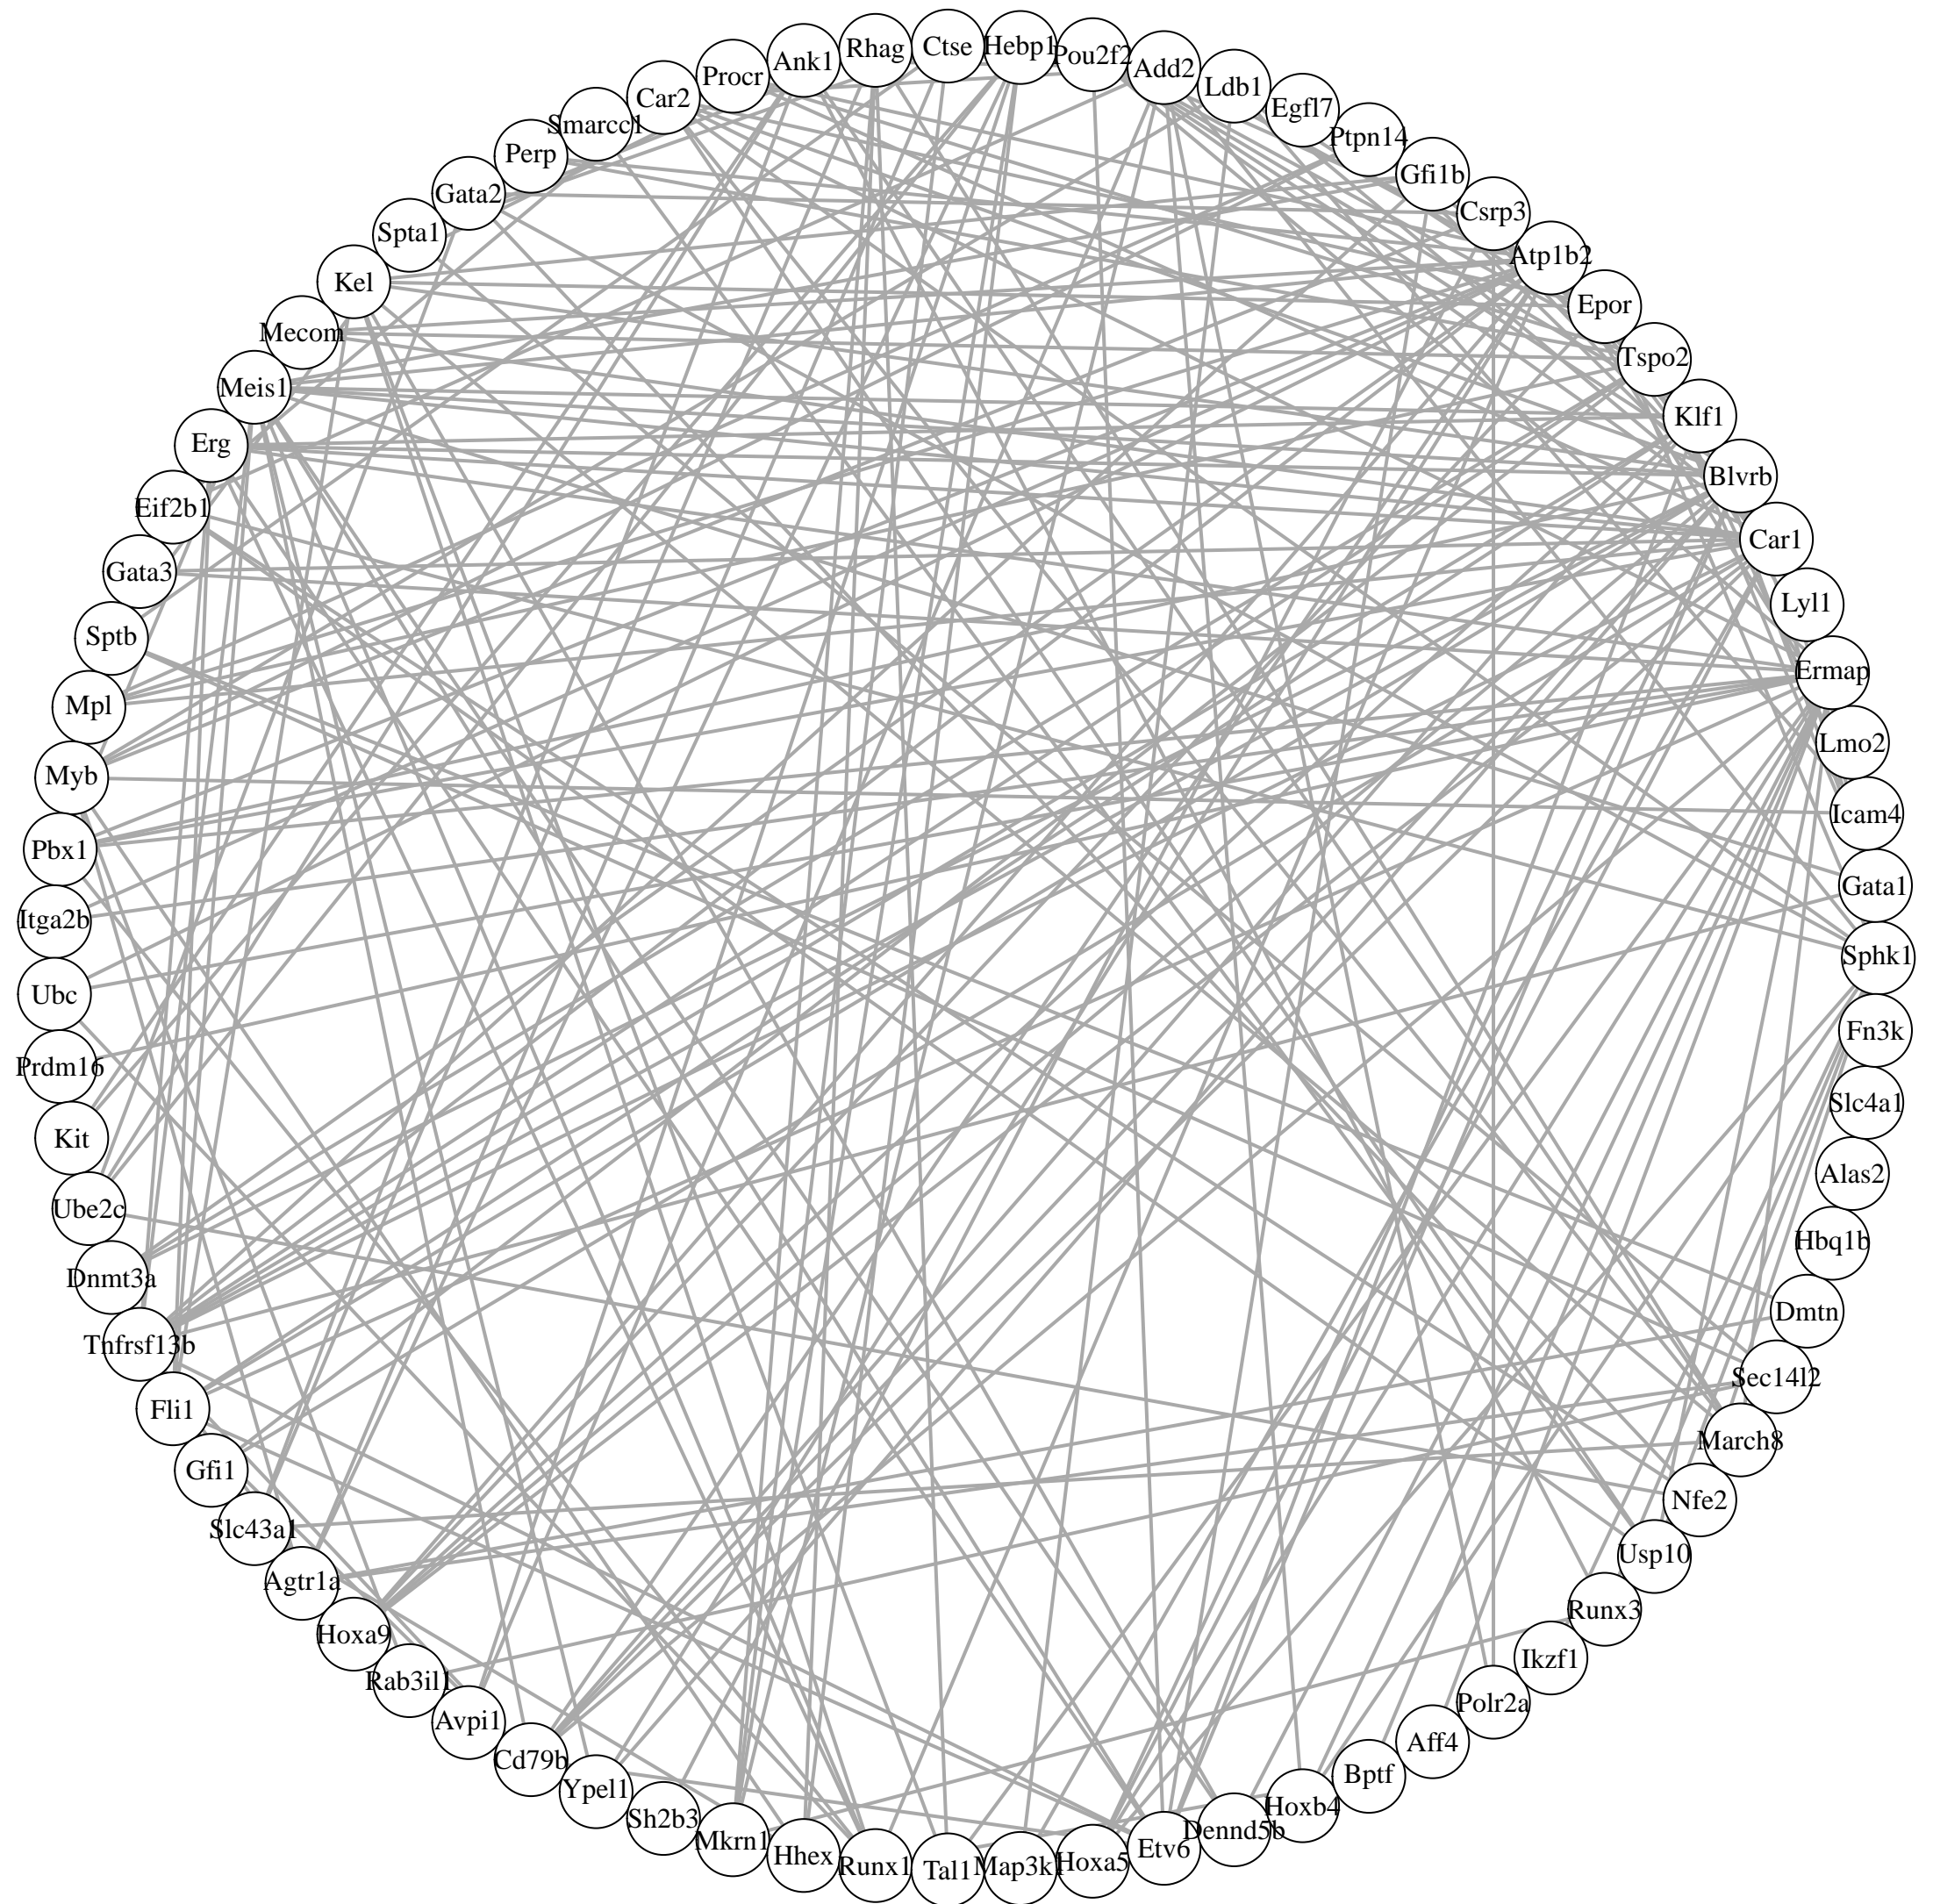

mouse\_HSCtoMEP\_time 25

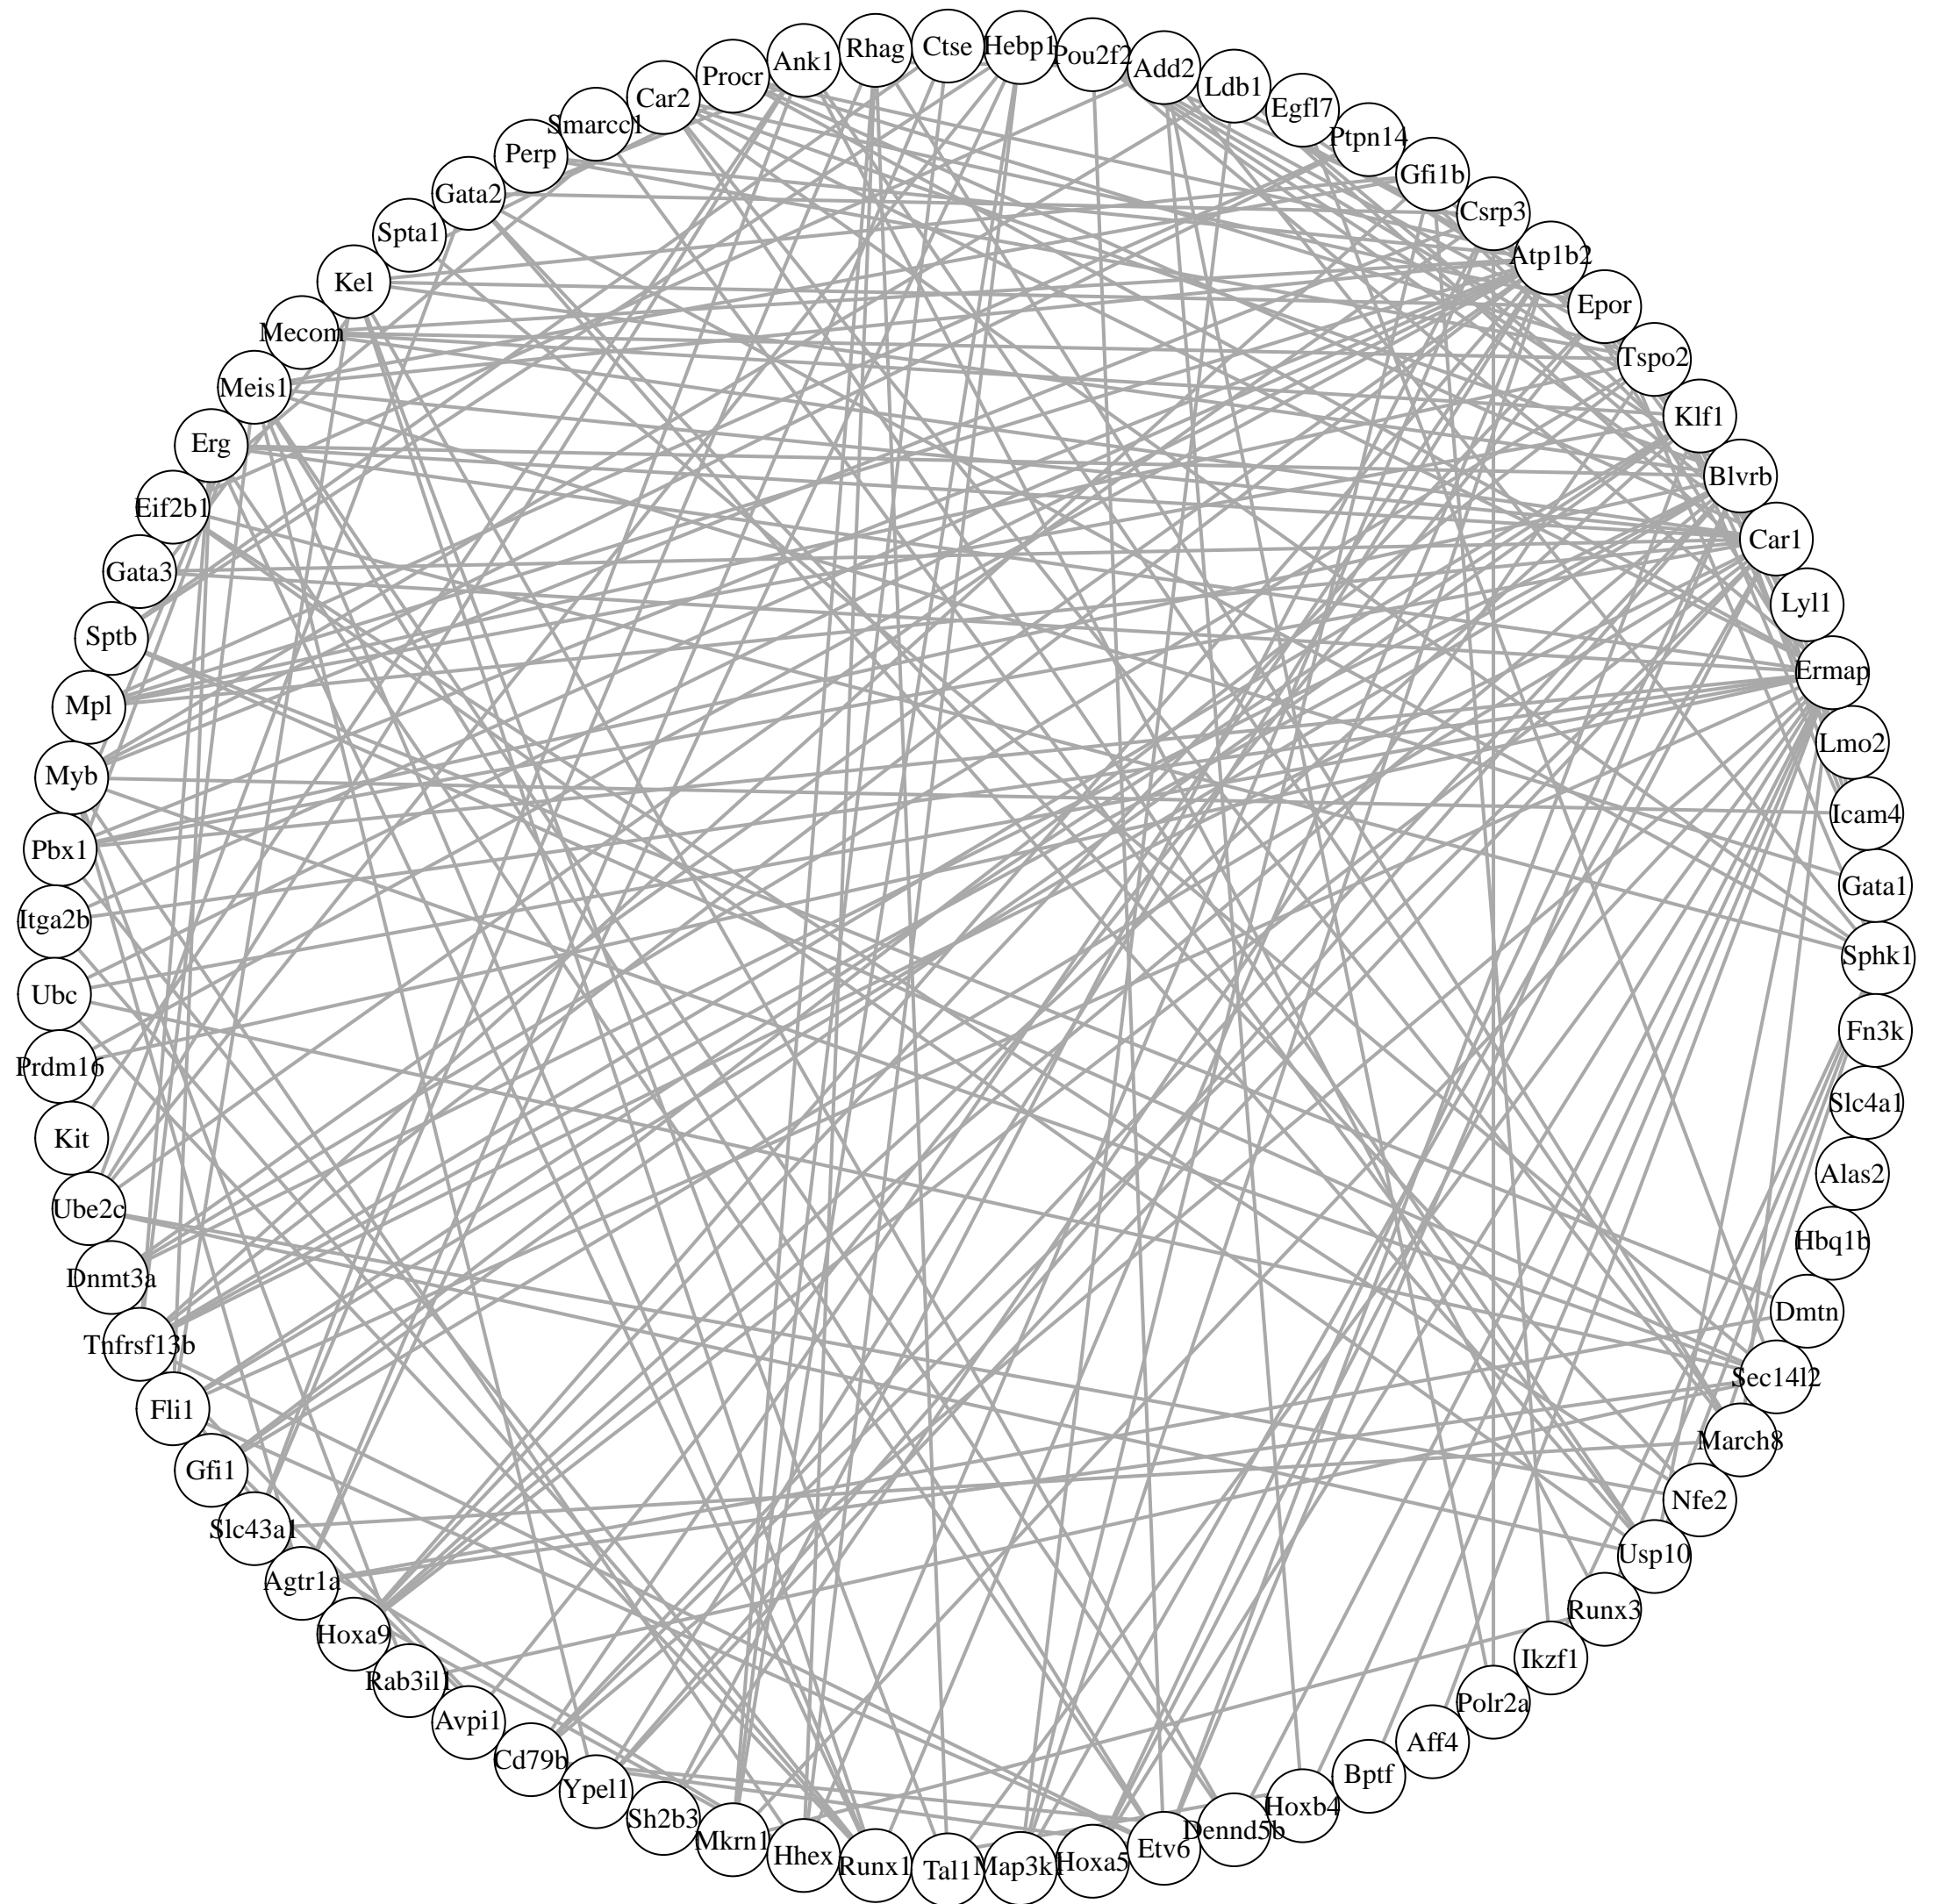

mouse\_HSCtoGMP\_time 1

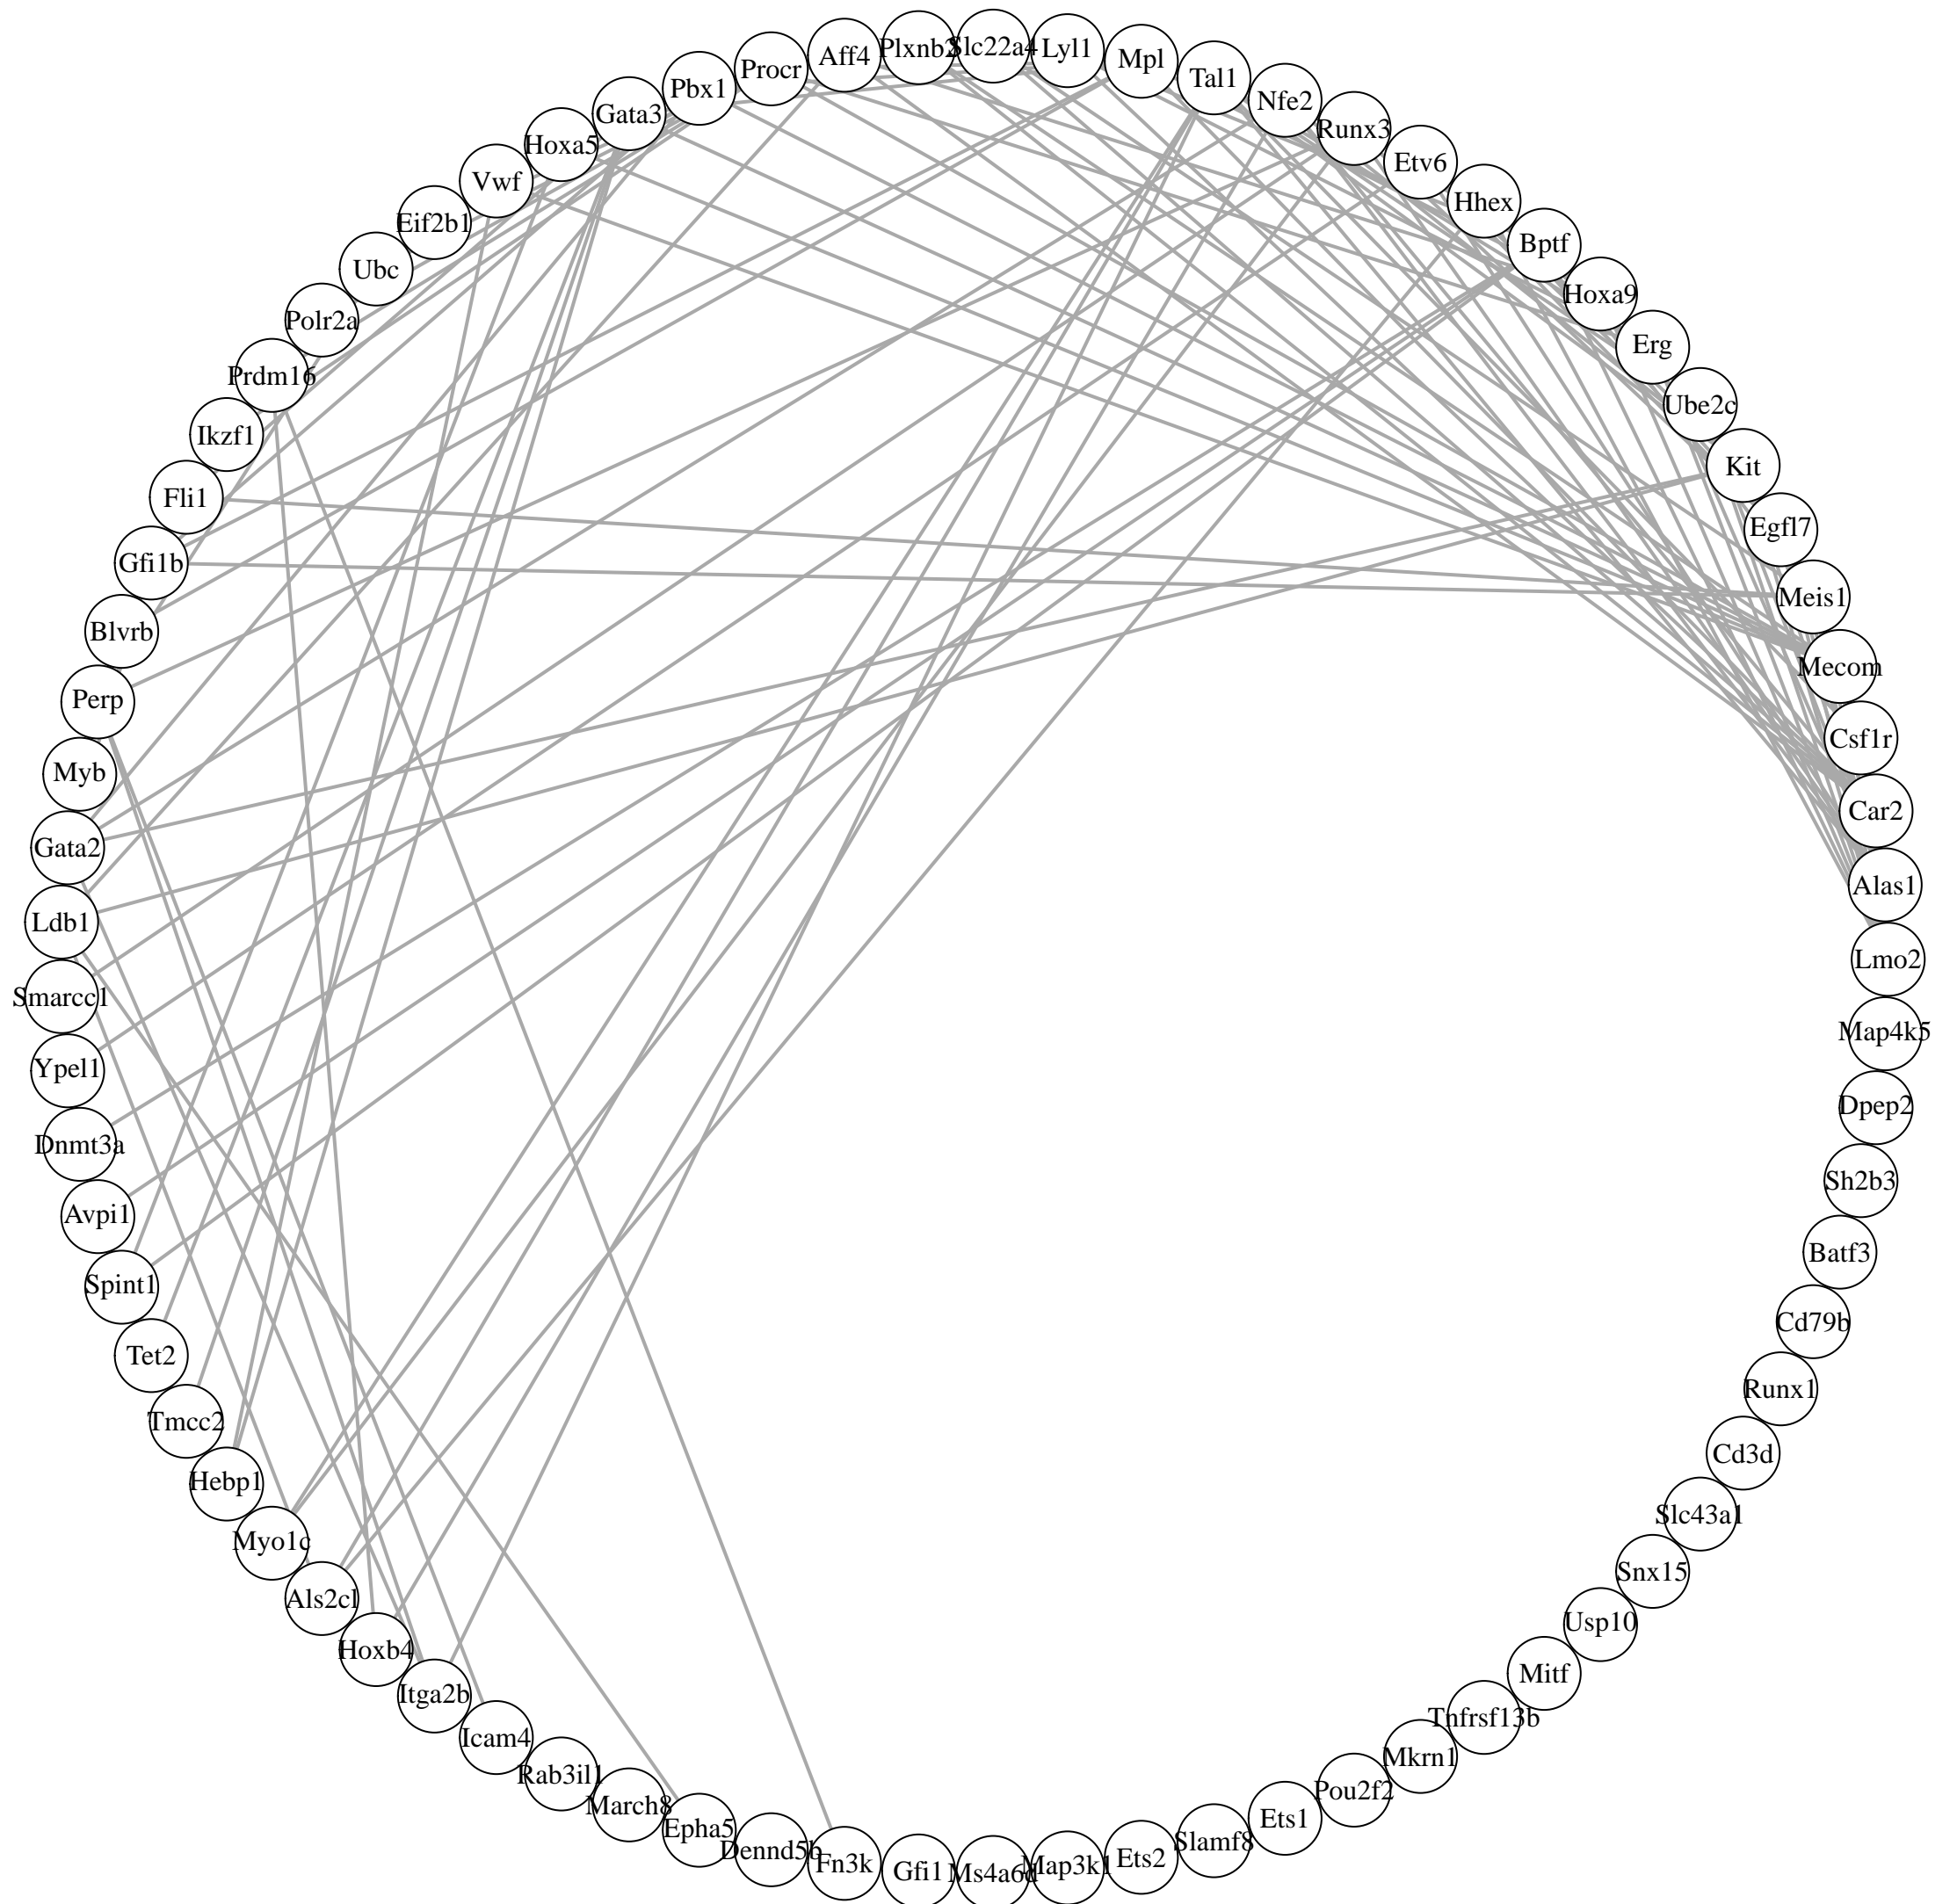

mouse\_HSCtoGMP\_time 2

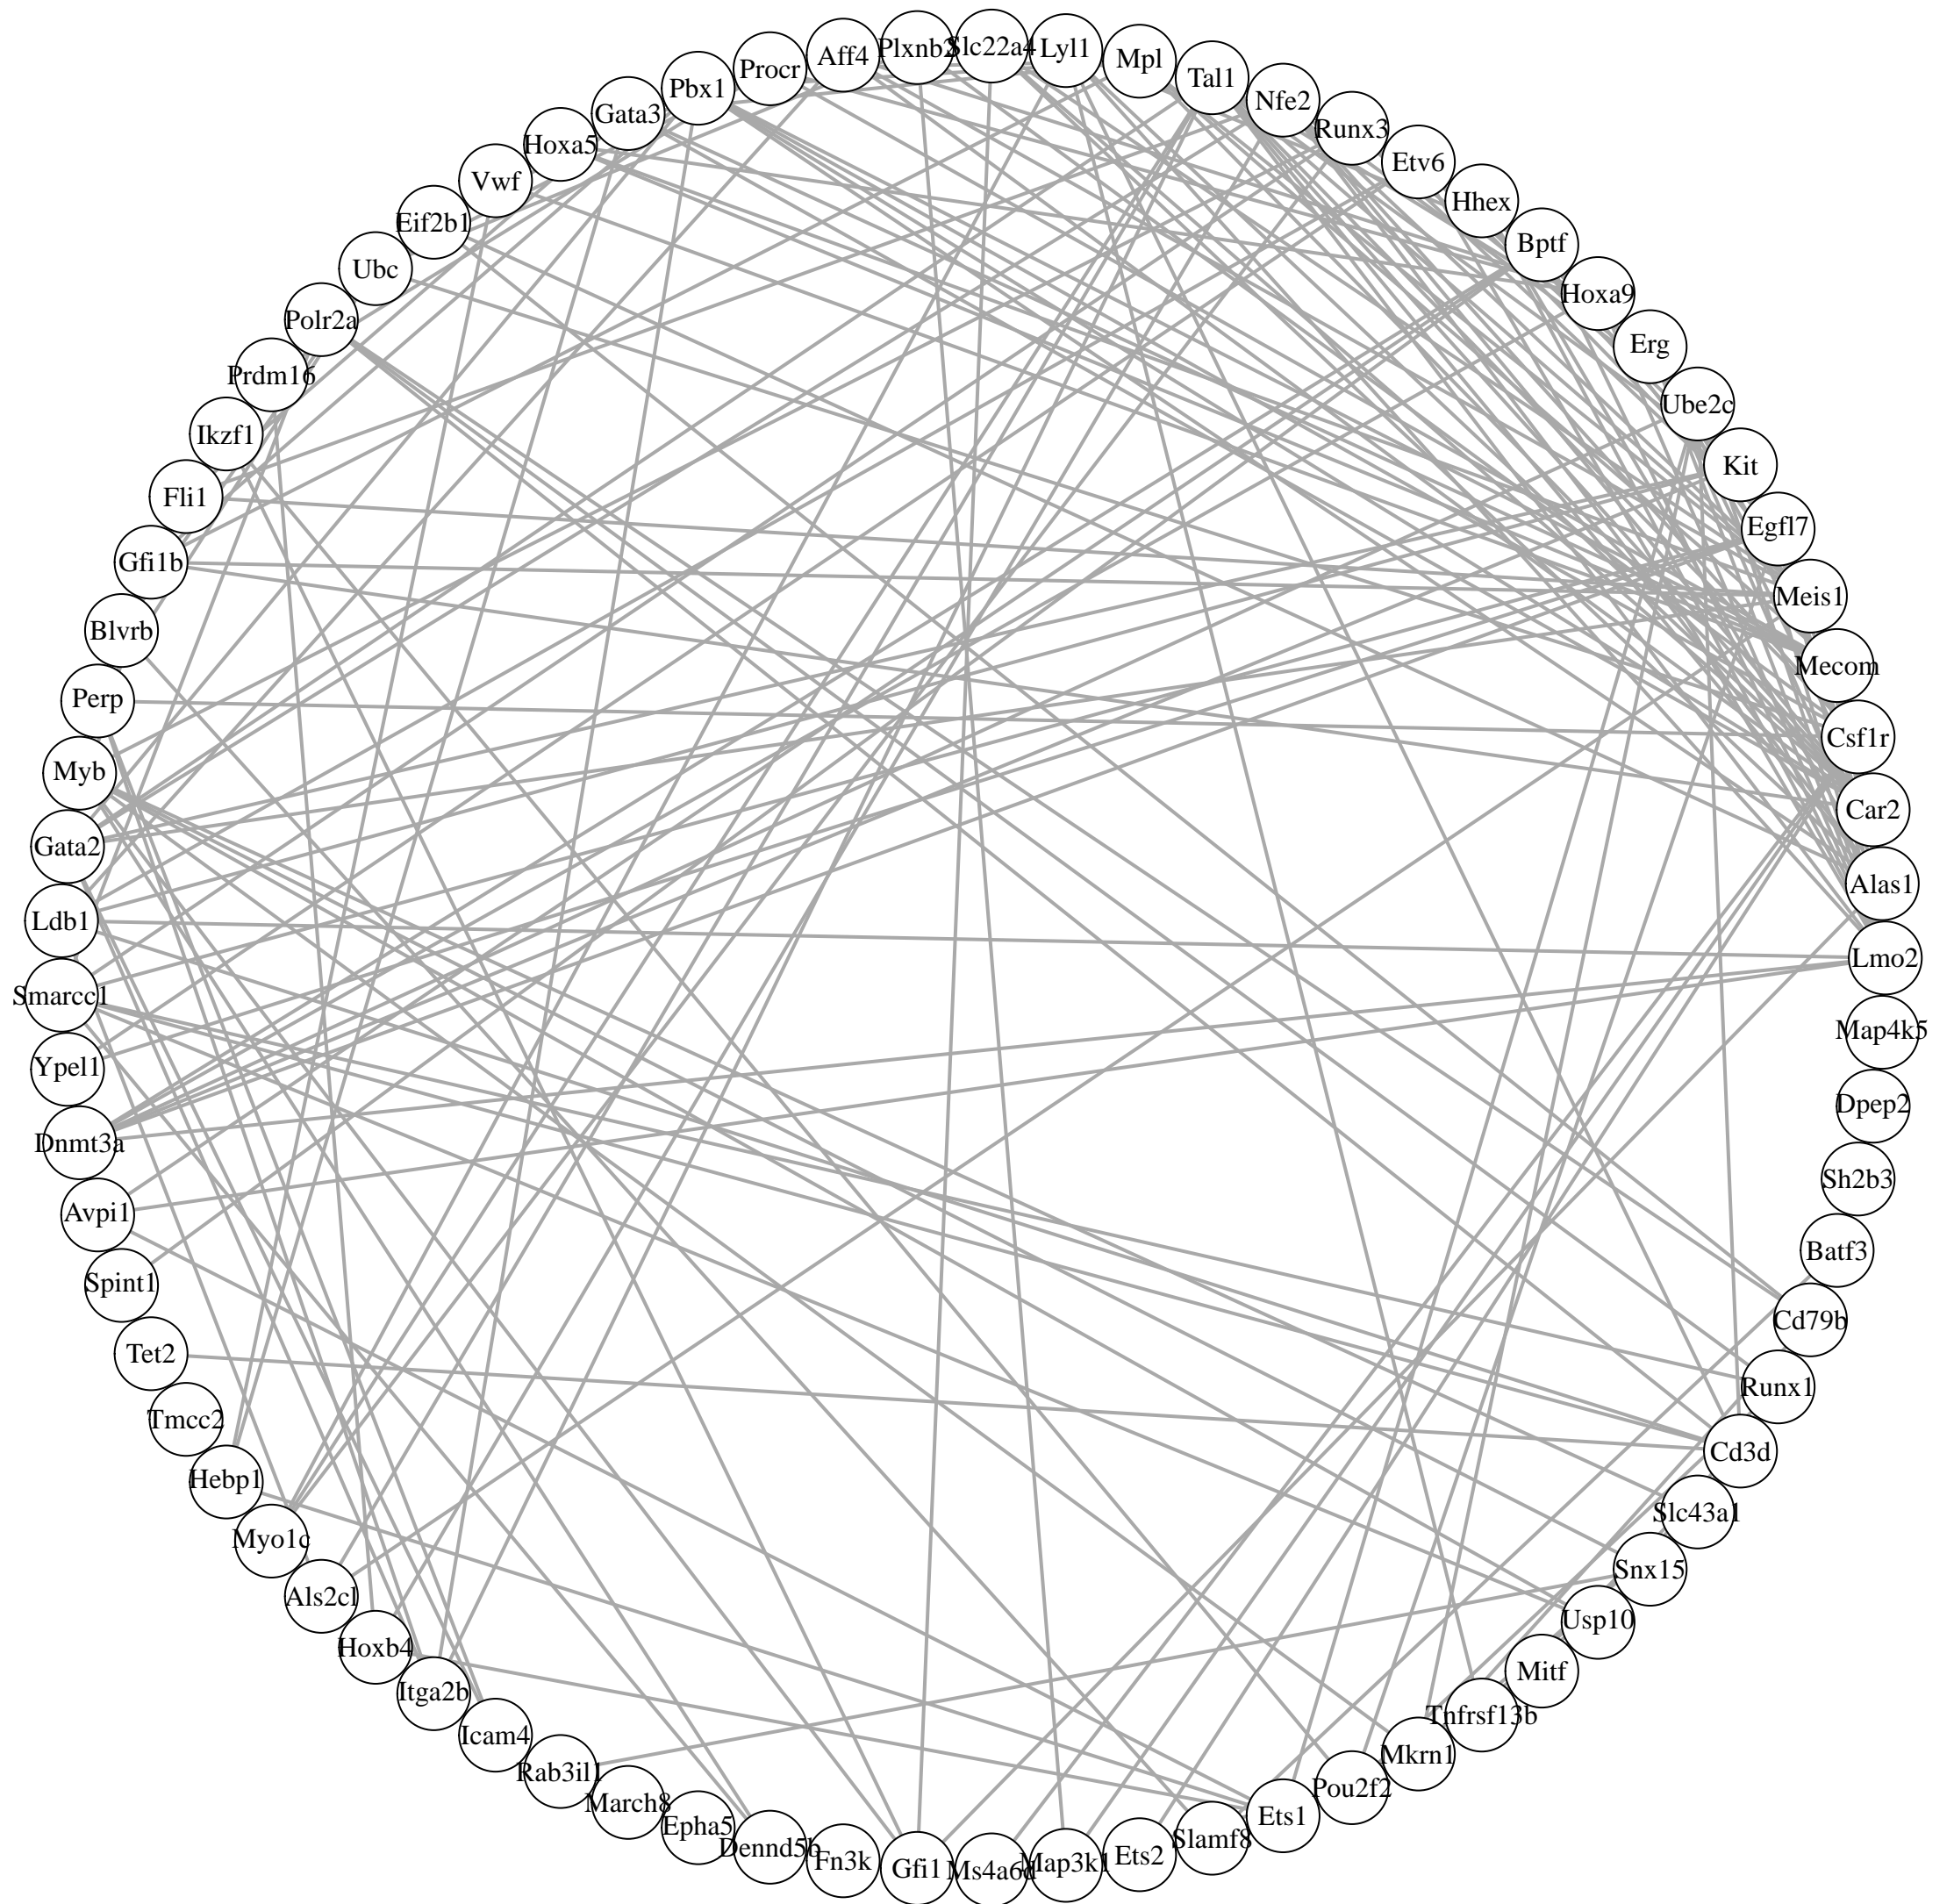



mouse\_HSCtoGMP\_time 3





mouse\_HSCtoGMP\_time 4



mouse\_HSCtoGMP\_time 5



mouse\_HSCtoGMP\_time 6

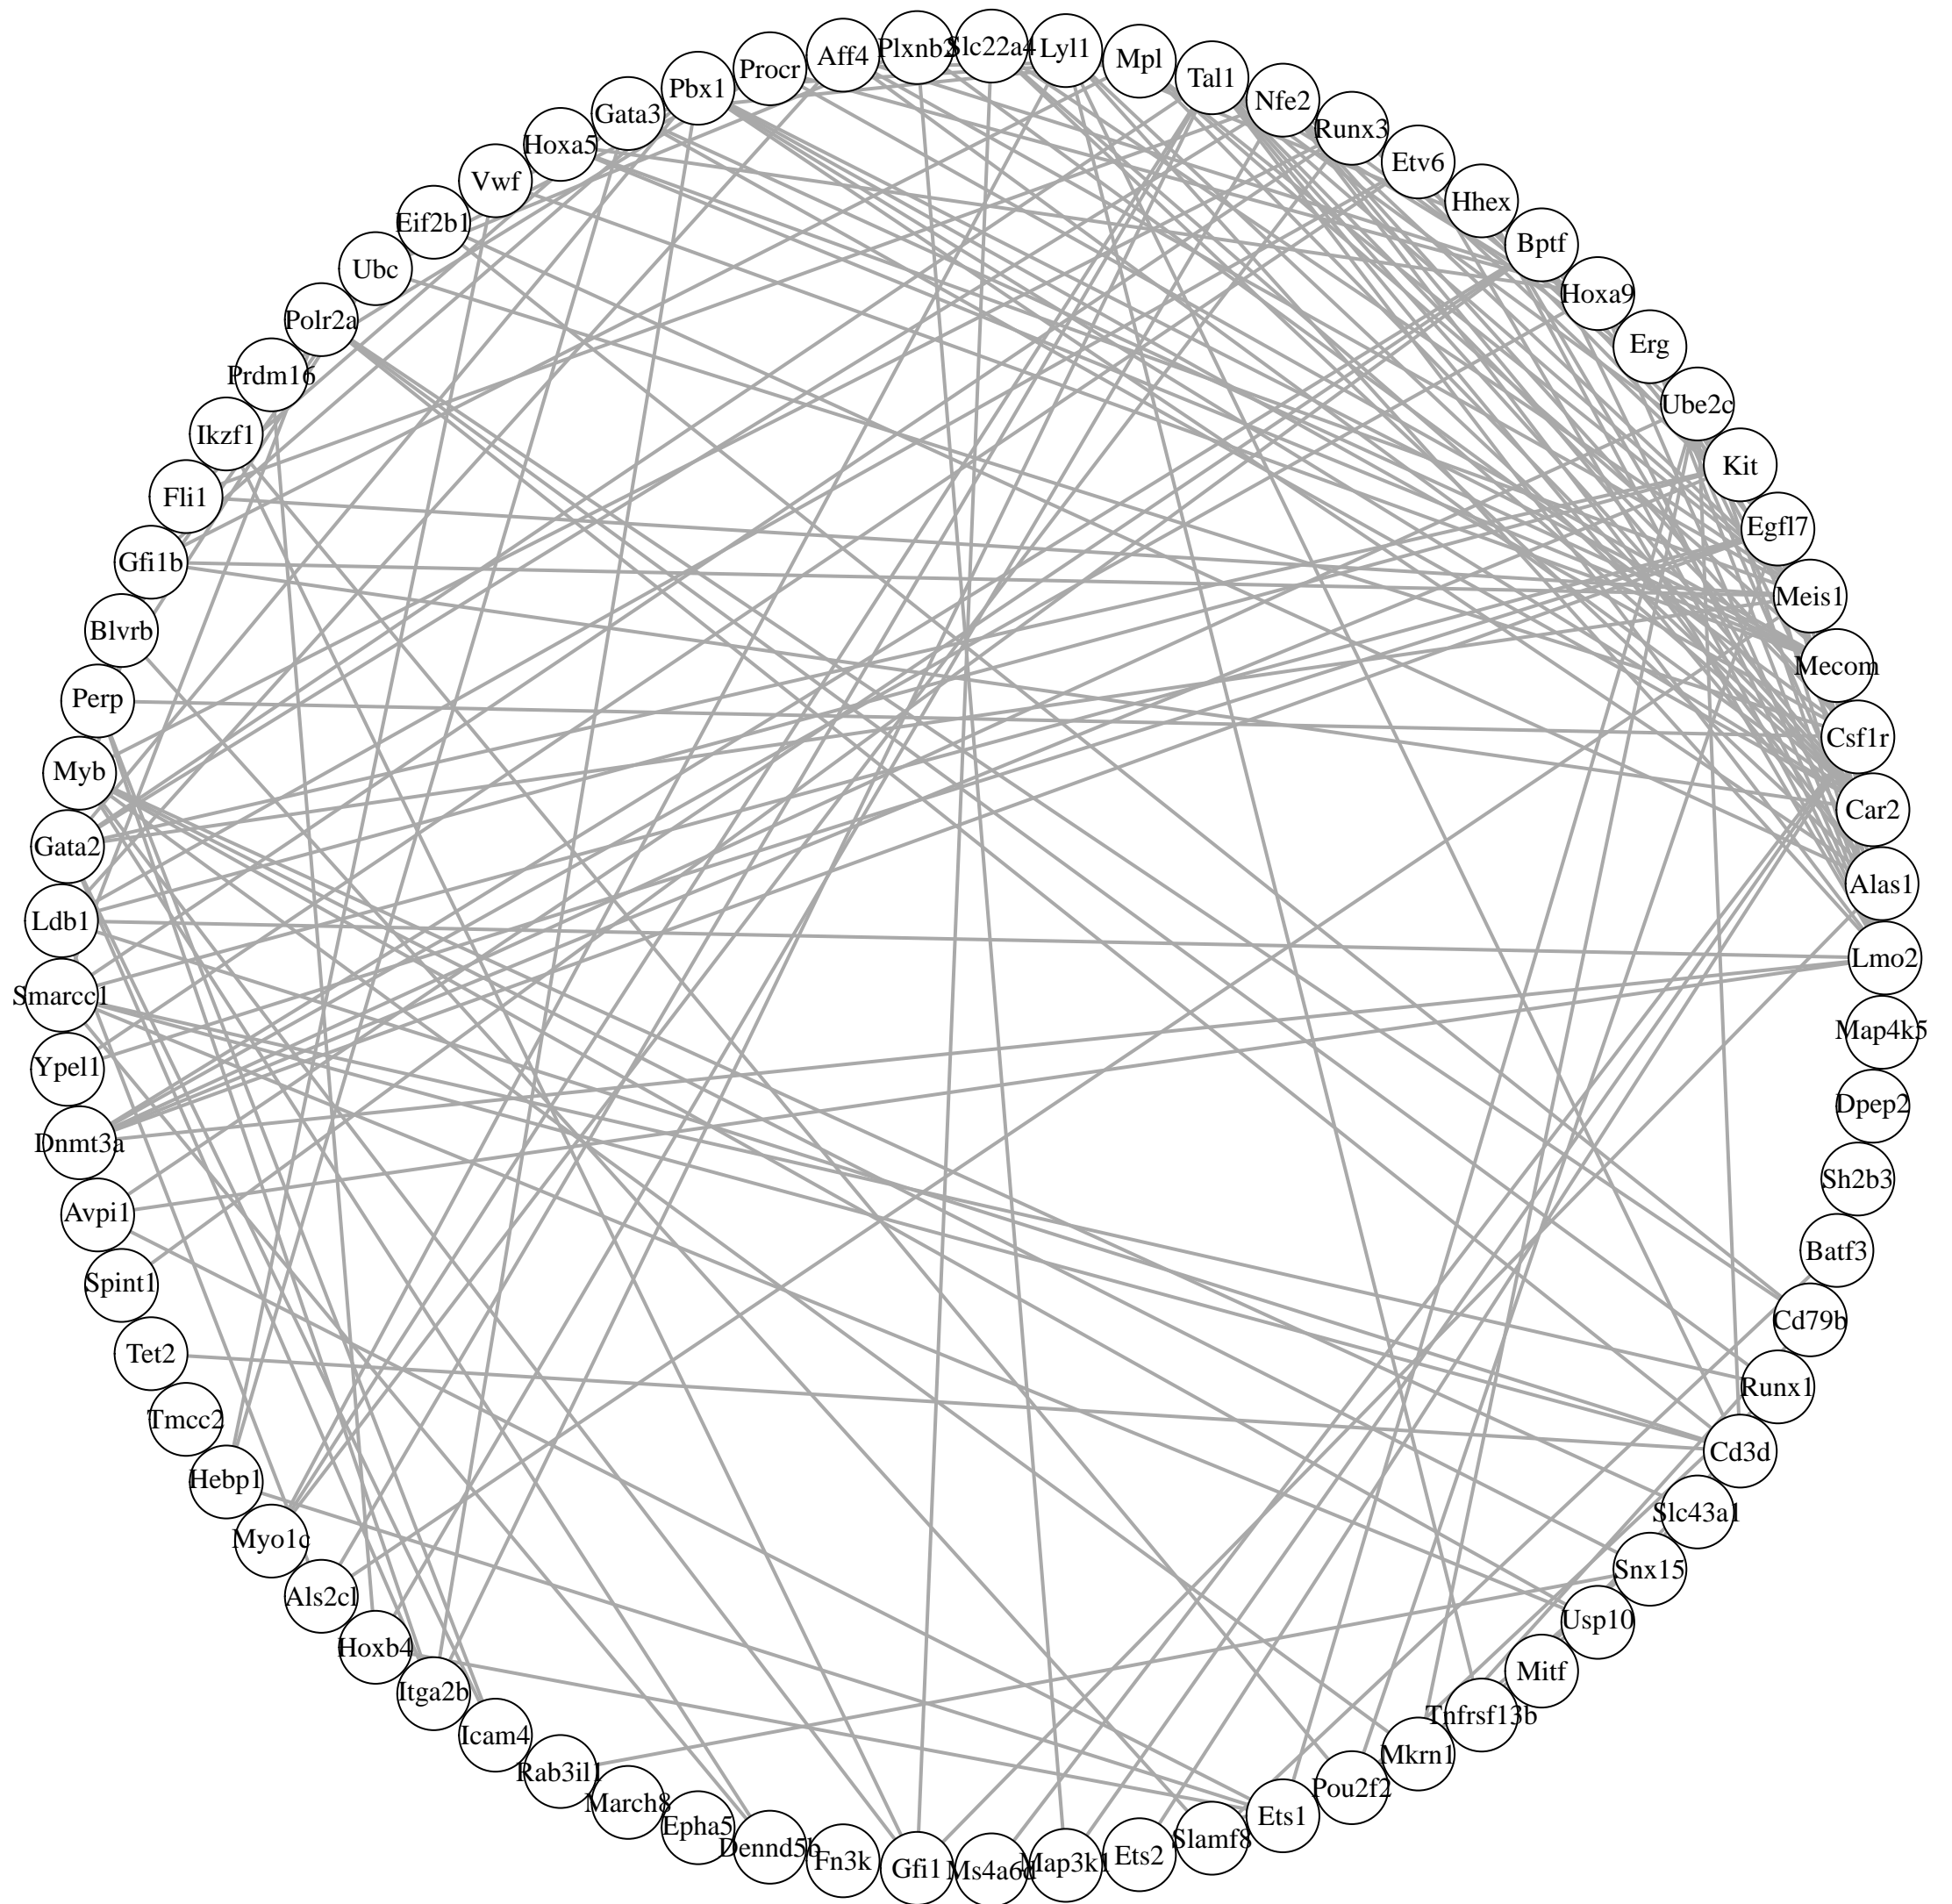

mouse\_HSCtoGMP\_time 7





mouse\_HSCtoGMP\_time 8



mouse\_HSCtoGMP\_time 9



mouse\_HSCtoGMP\_time 10



mouse\_HSCtoGMP\_time 11





mouse\_HSCtoGMP\_time 12



mouse\_HSCtoGMP\_time 13

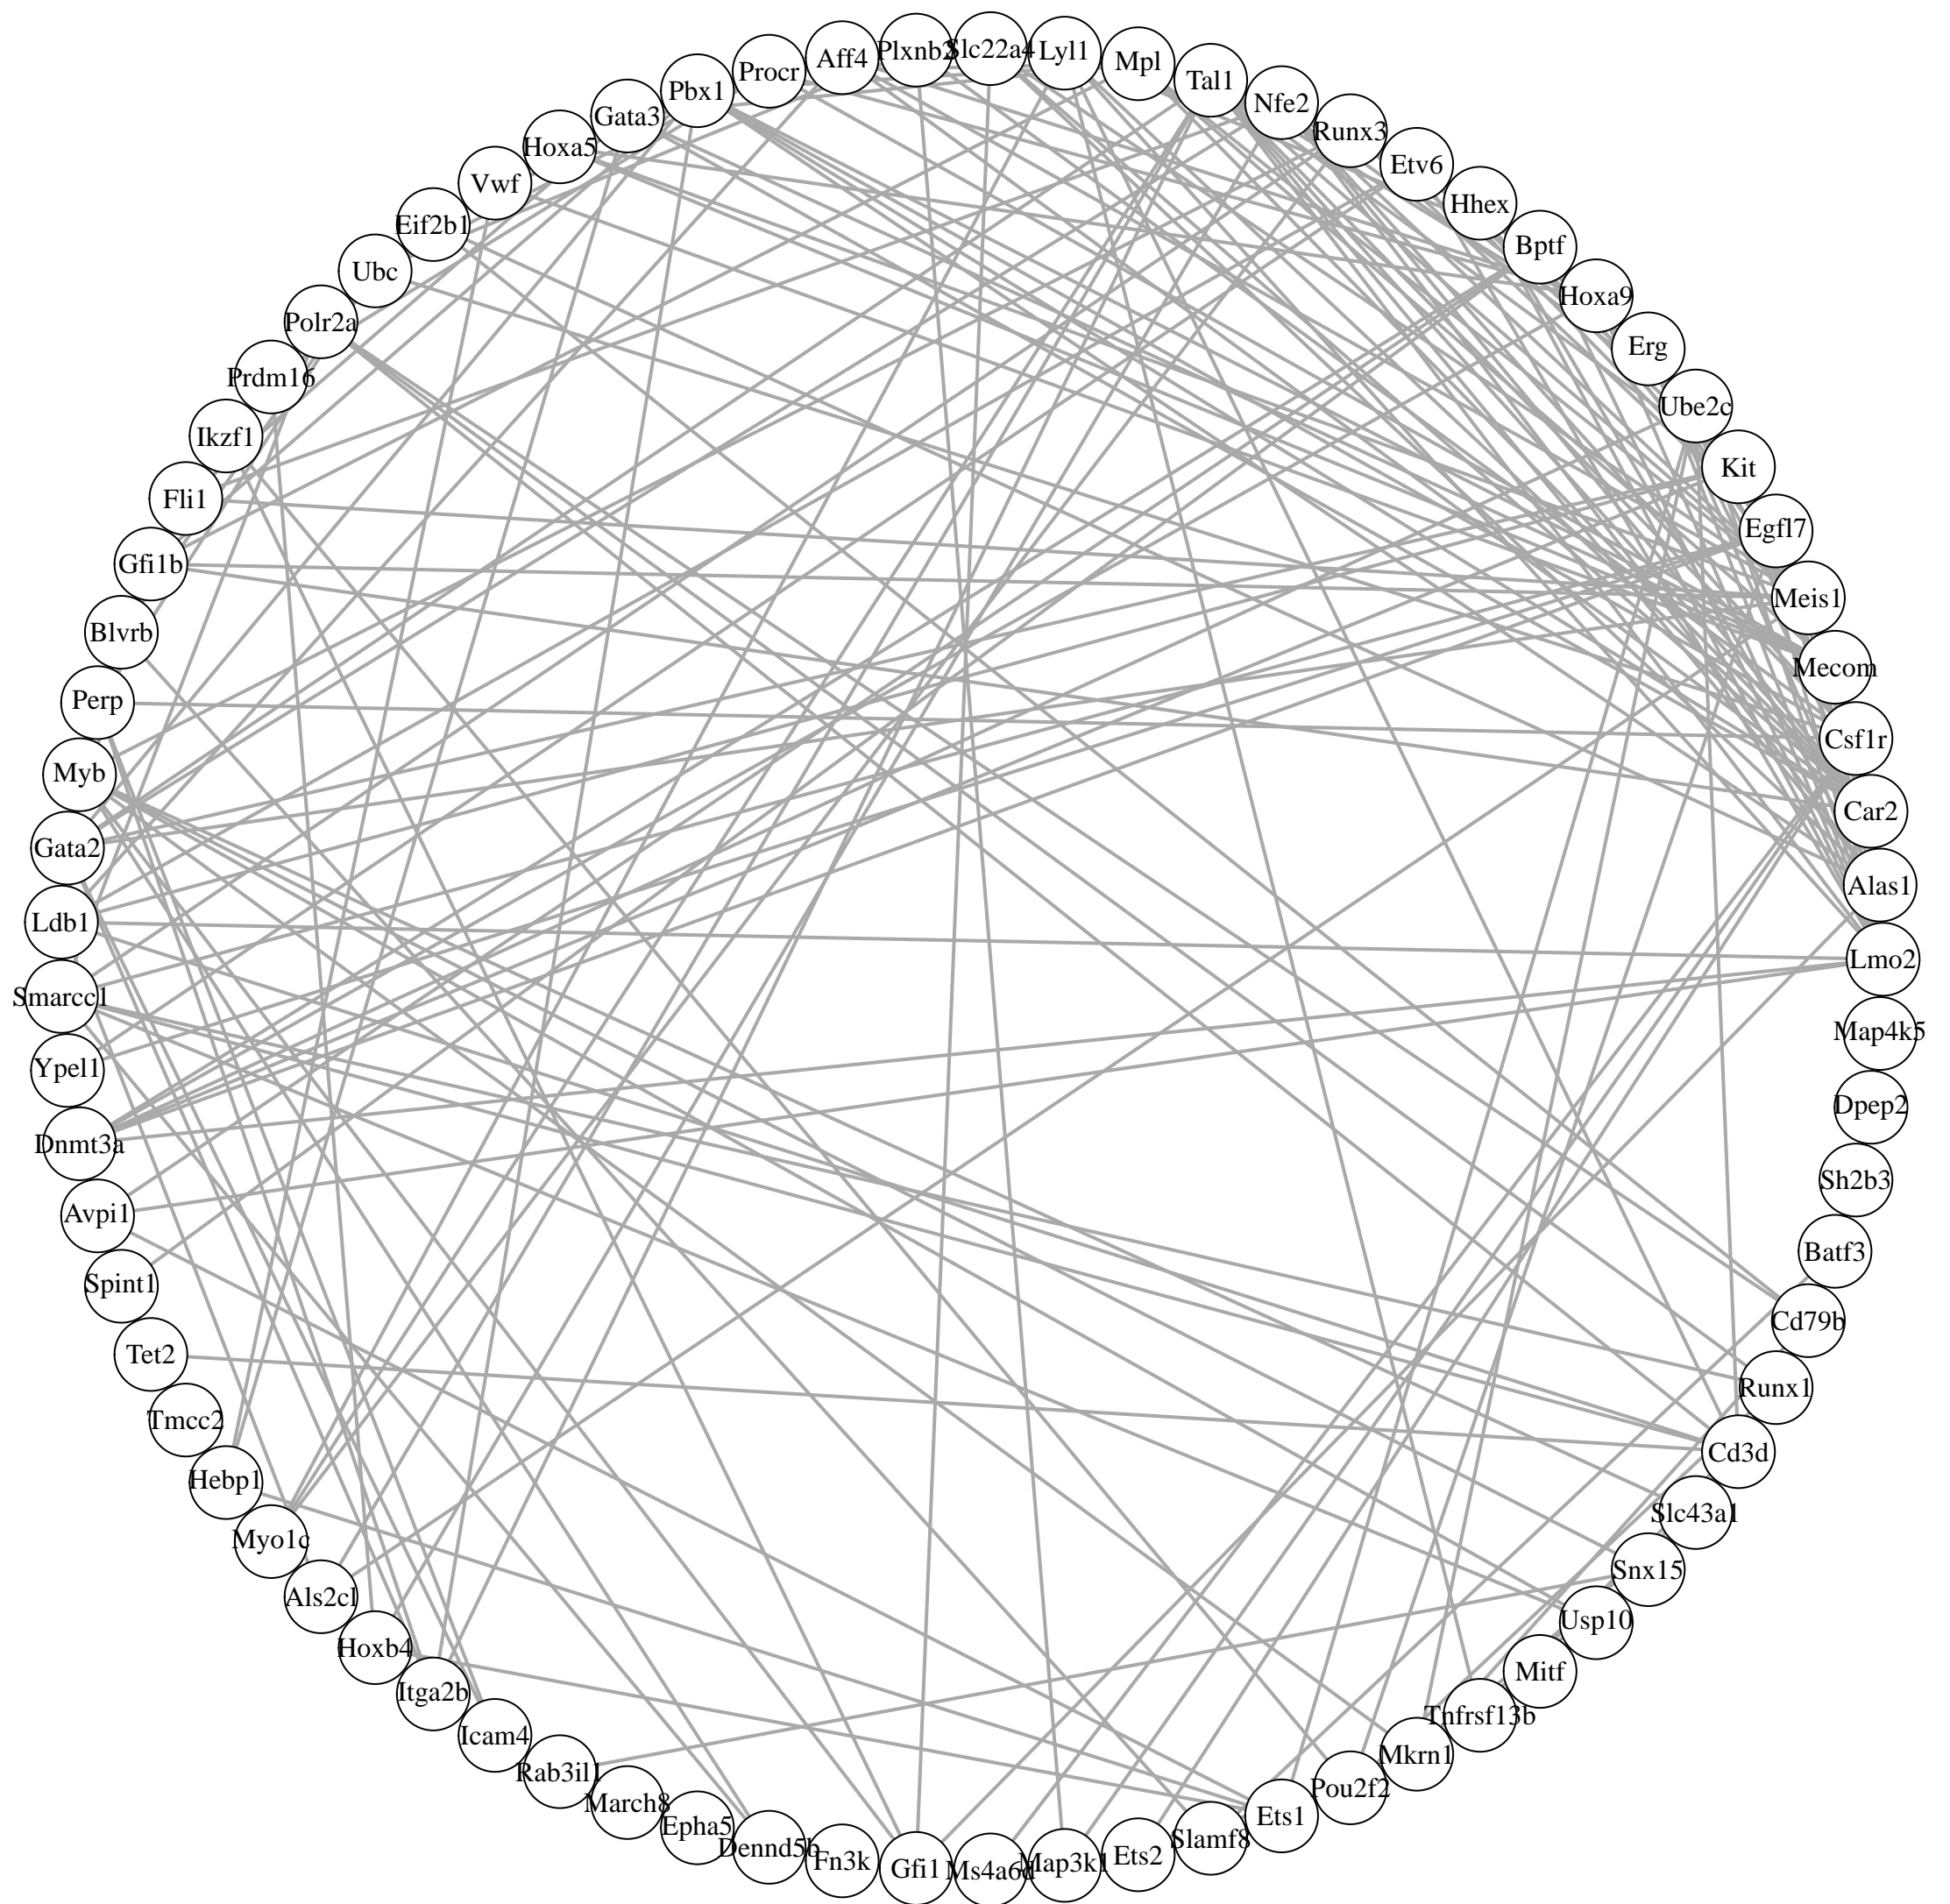

mouse\_HSCtoGMP\_time 14



mouse\_HSCtoGMP\_time 15





mouse\_HSCtoGMP\_time 16



mouse\_HSCtoGMP\_time 17

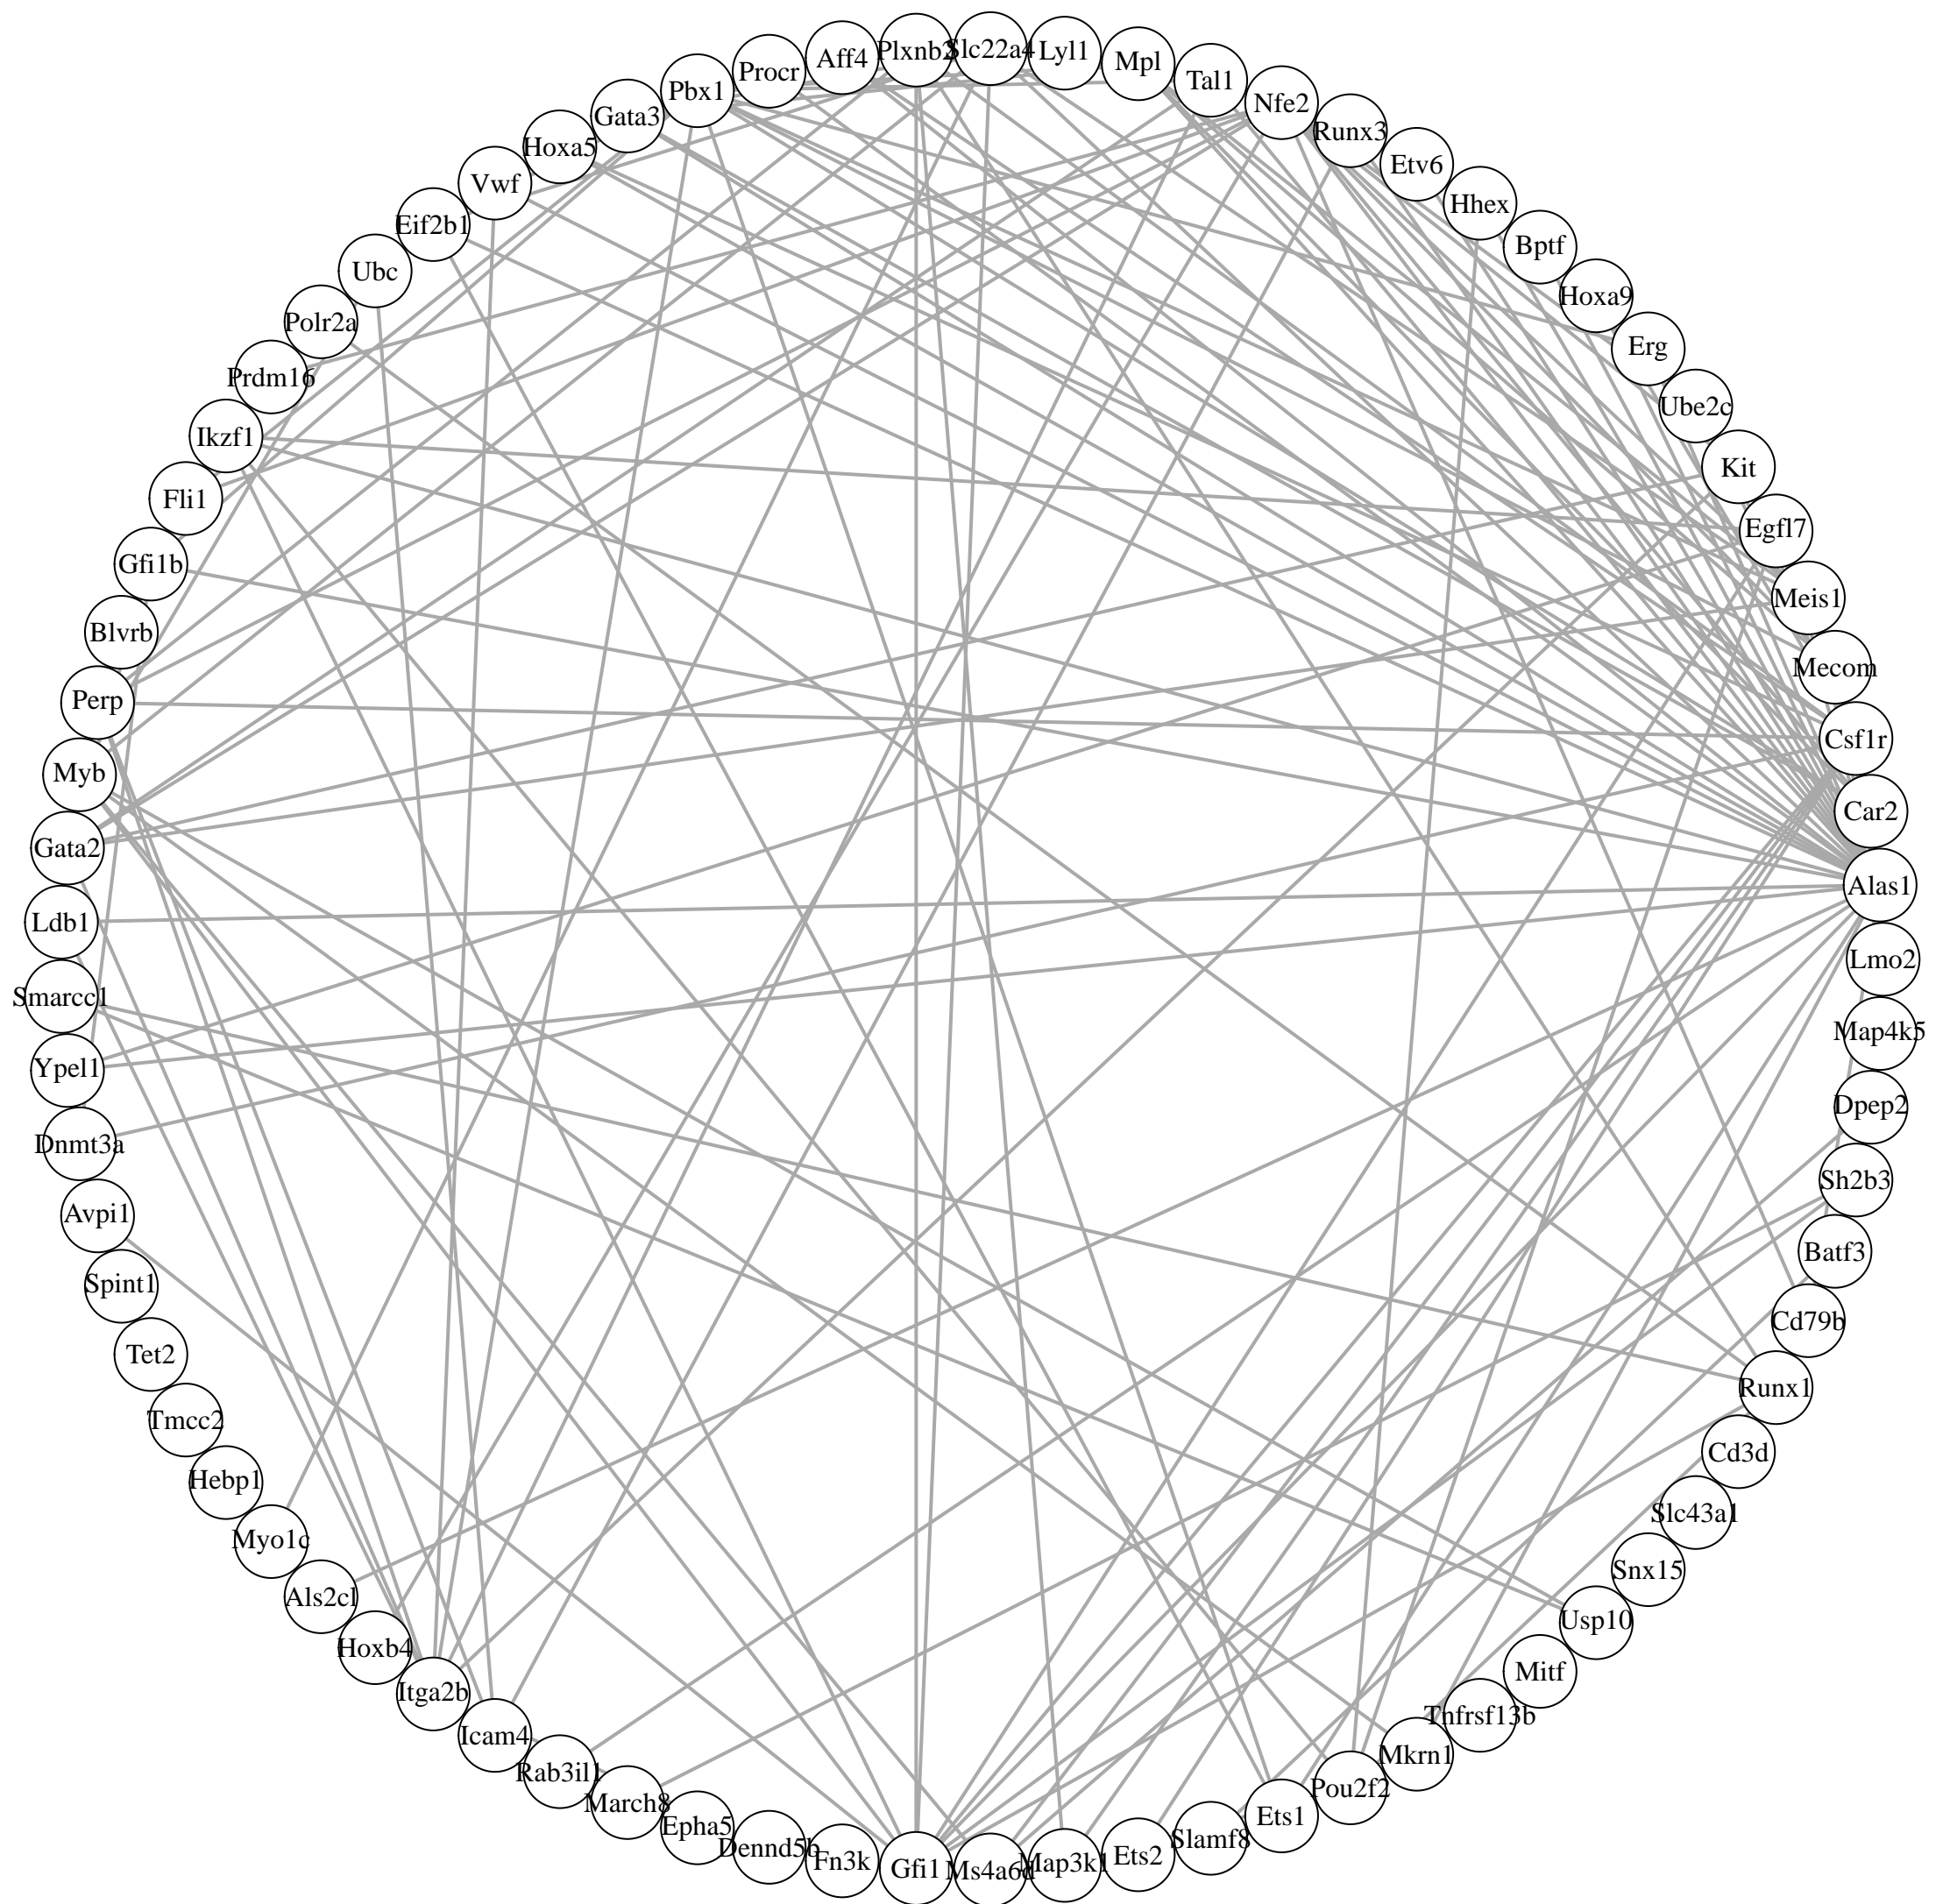

mouse\_HSCtoGMP\_time 18

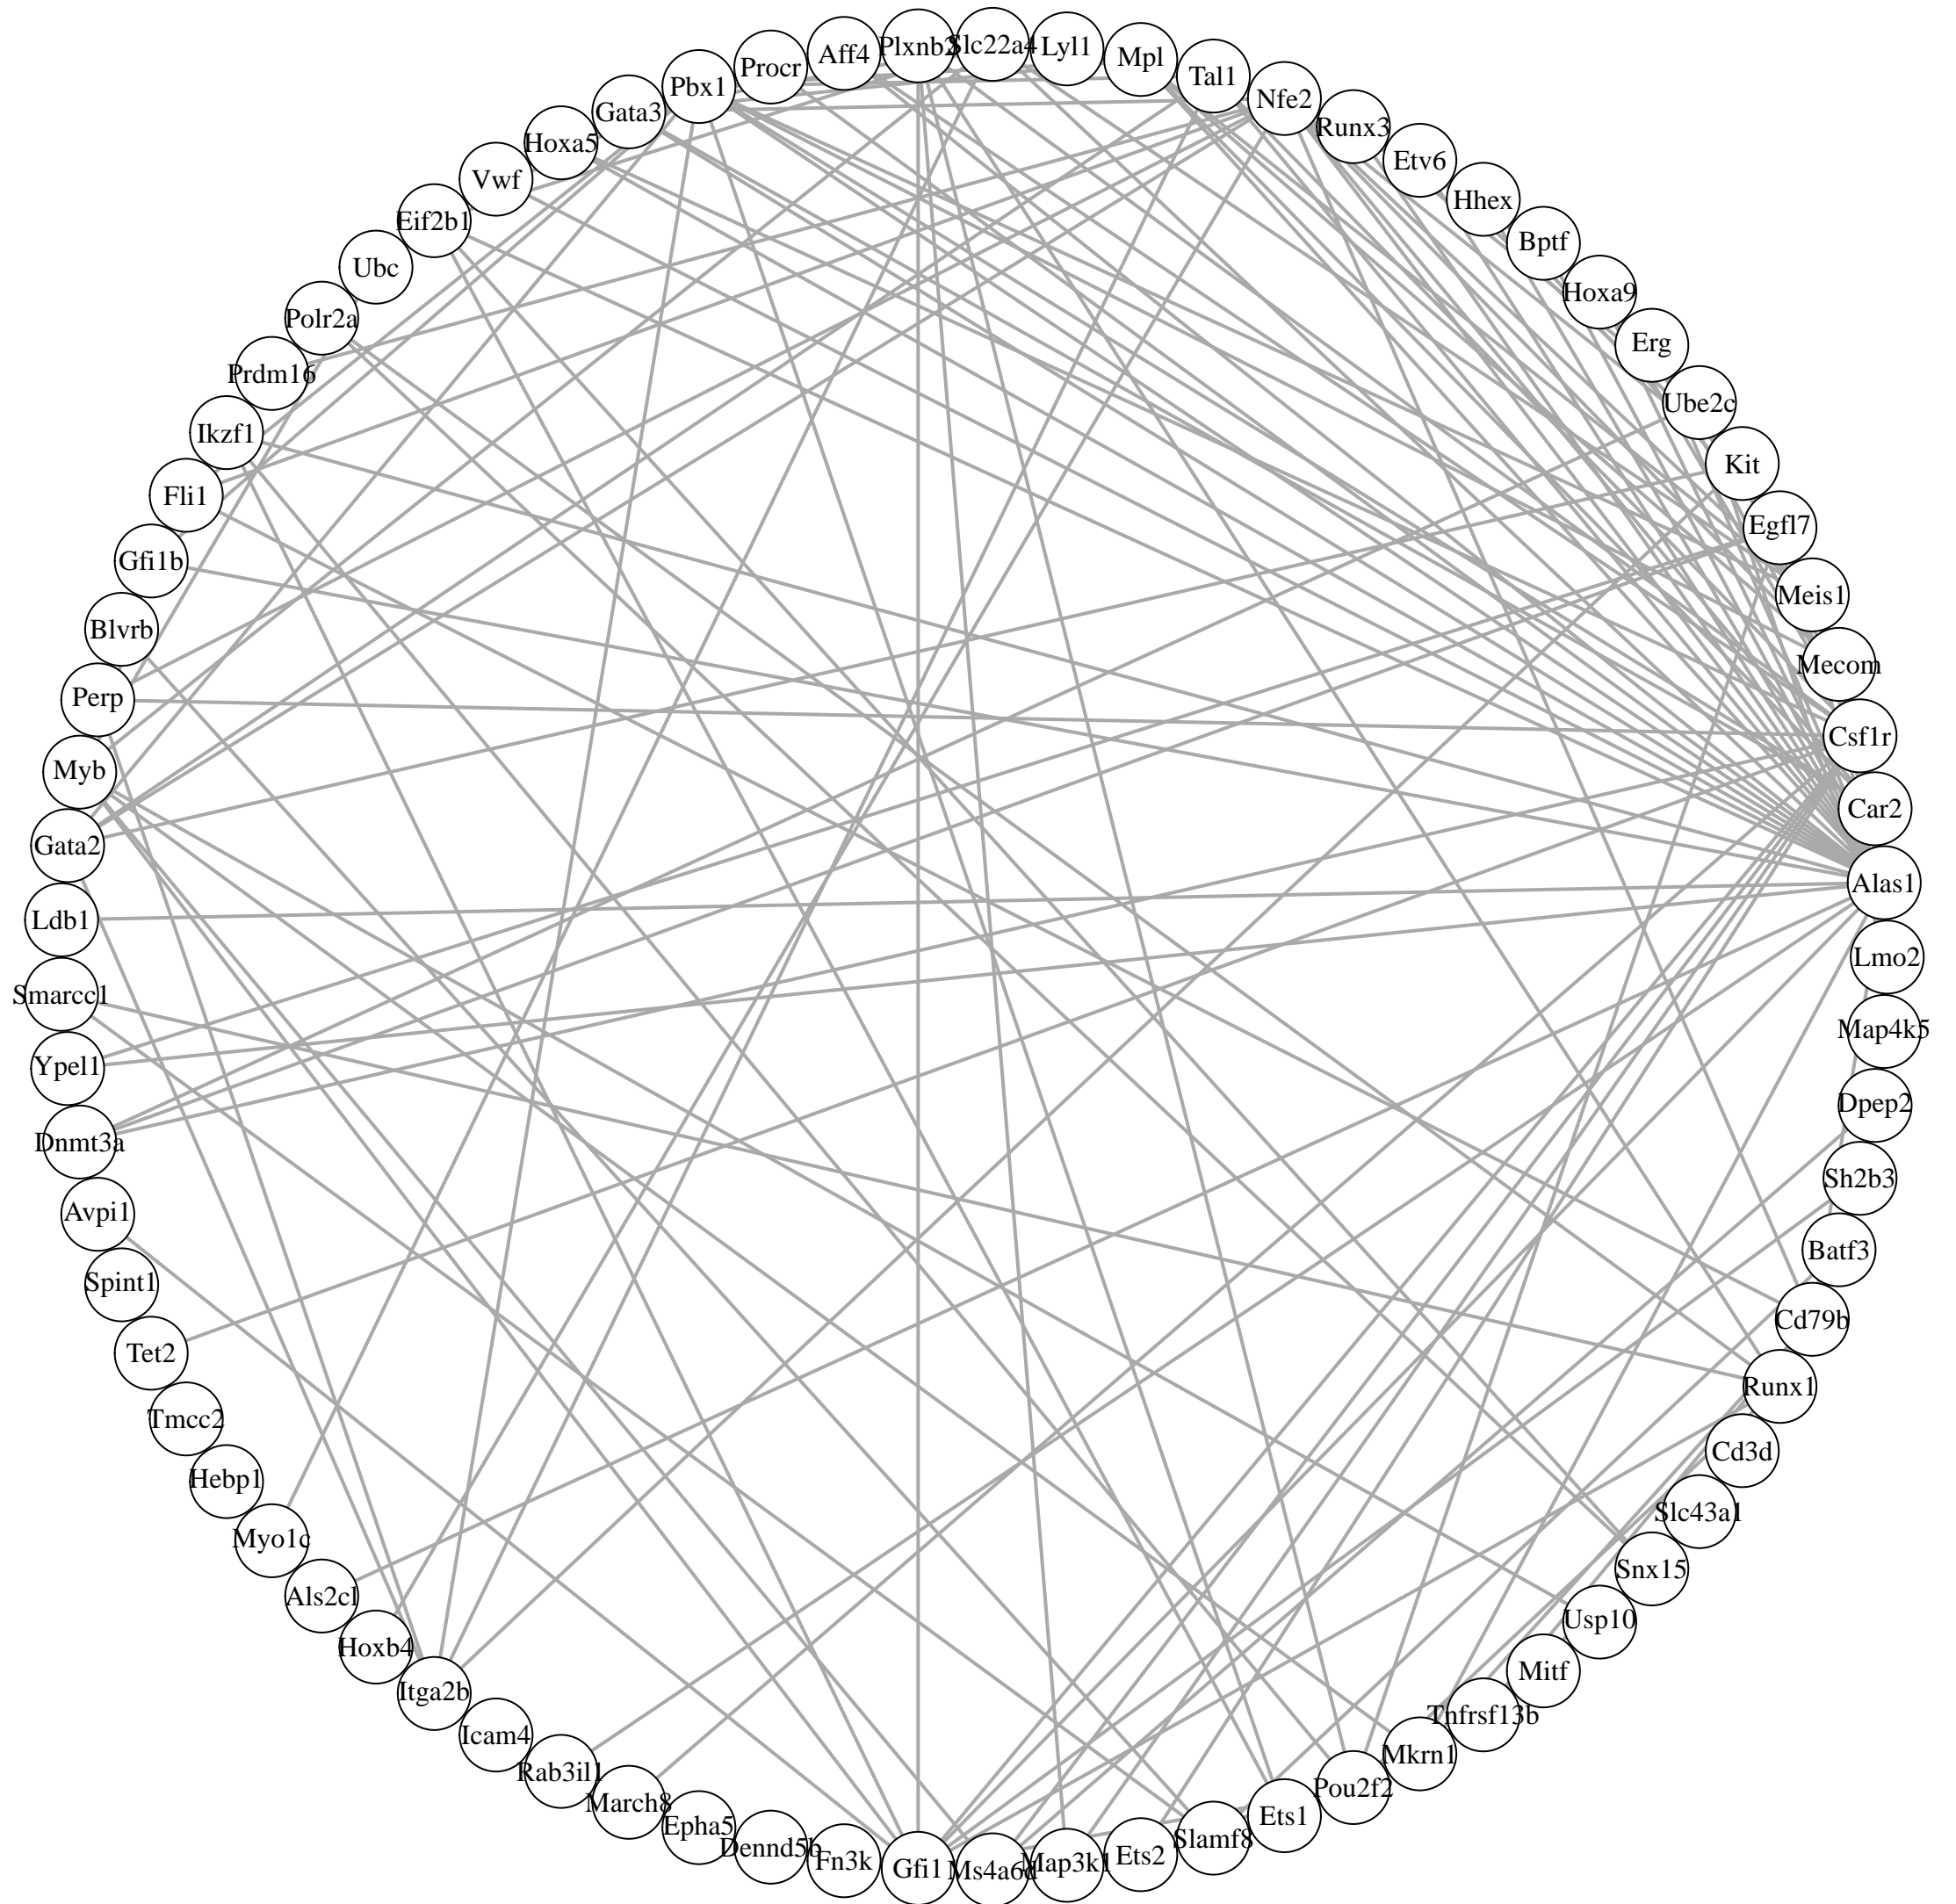

mouse\_HSCtoGMP\_time 19

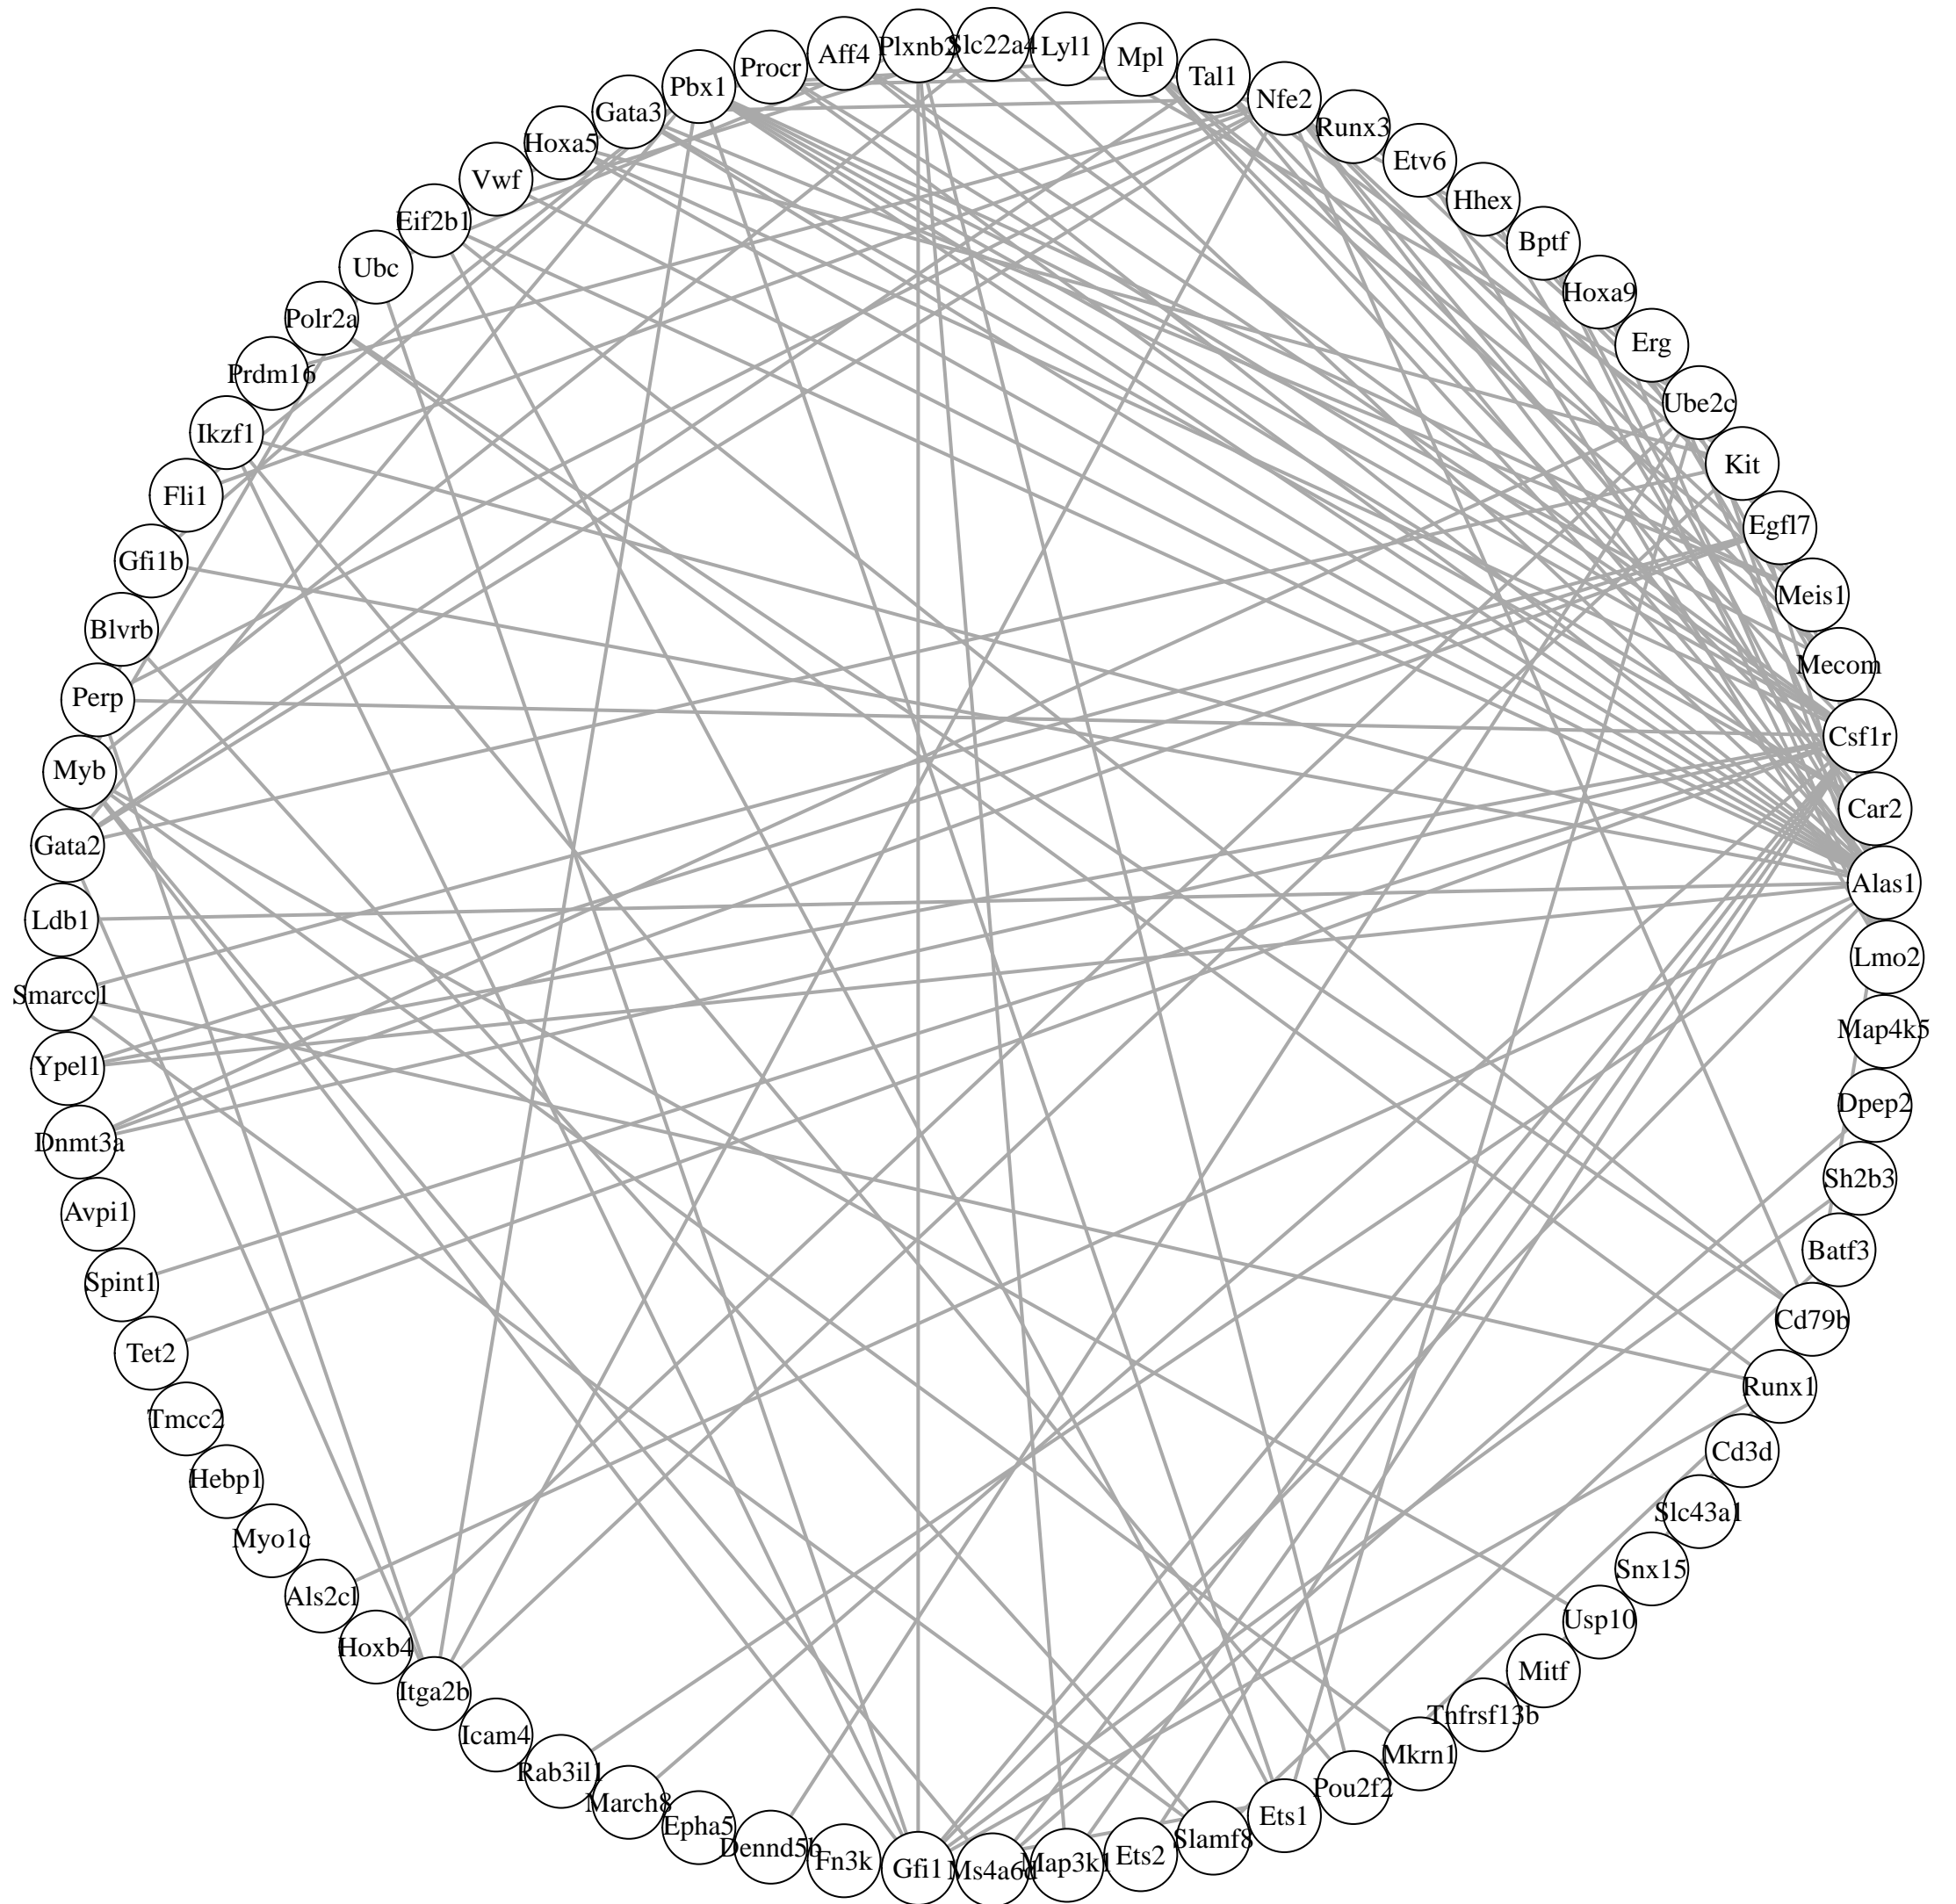



mouse\_HSCtoGMP\_time 20

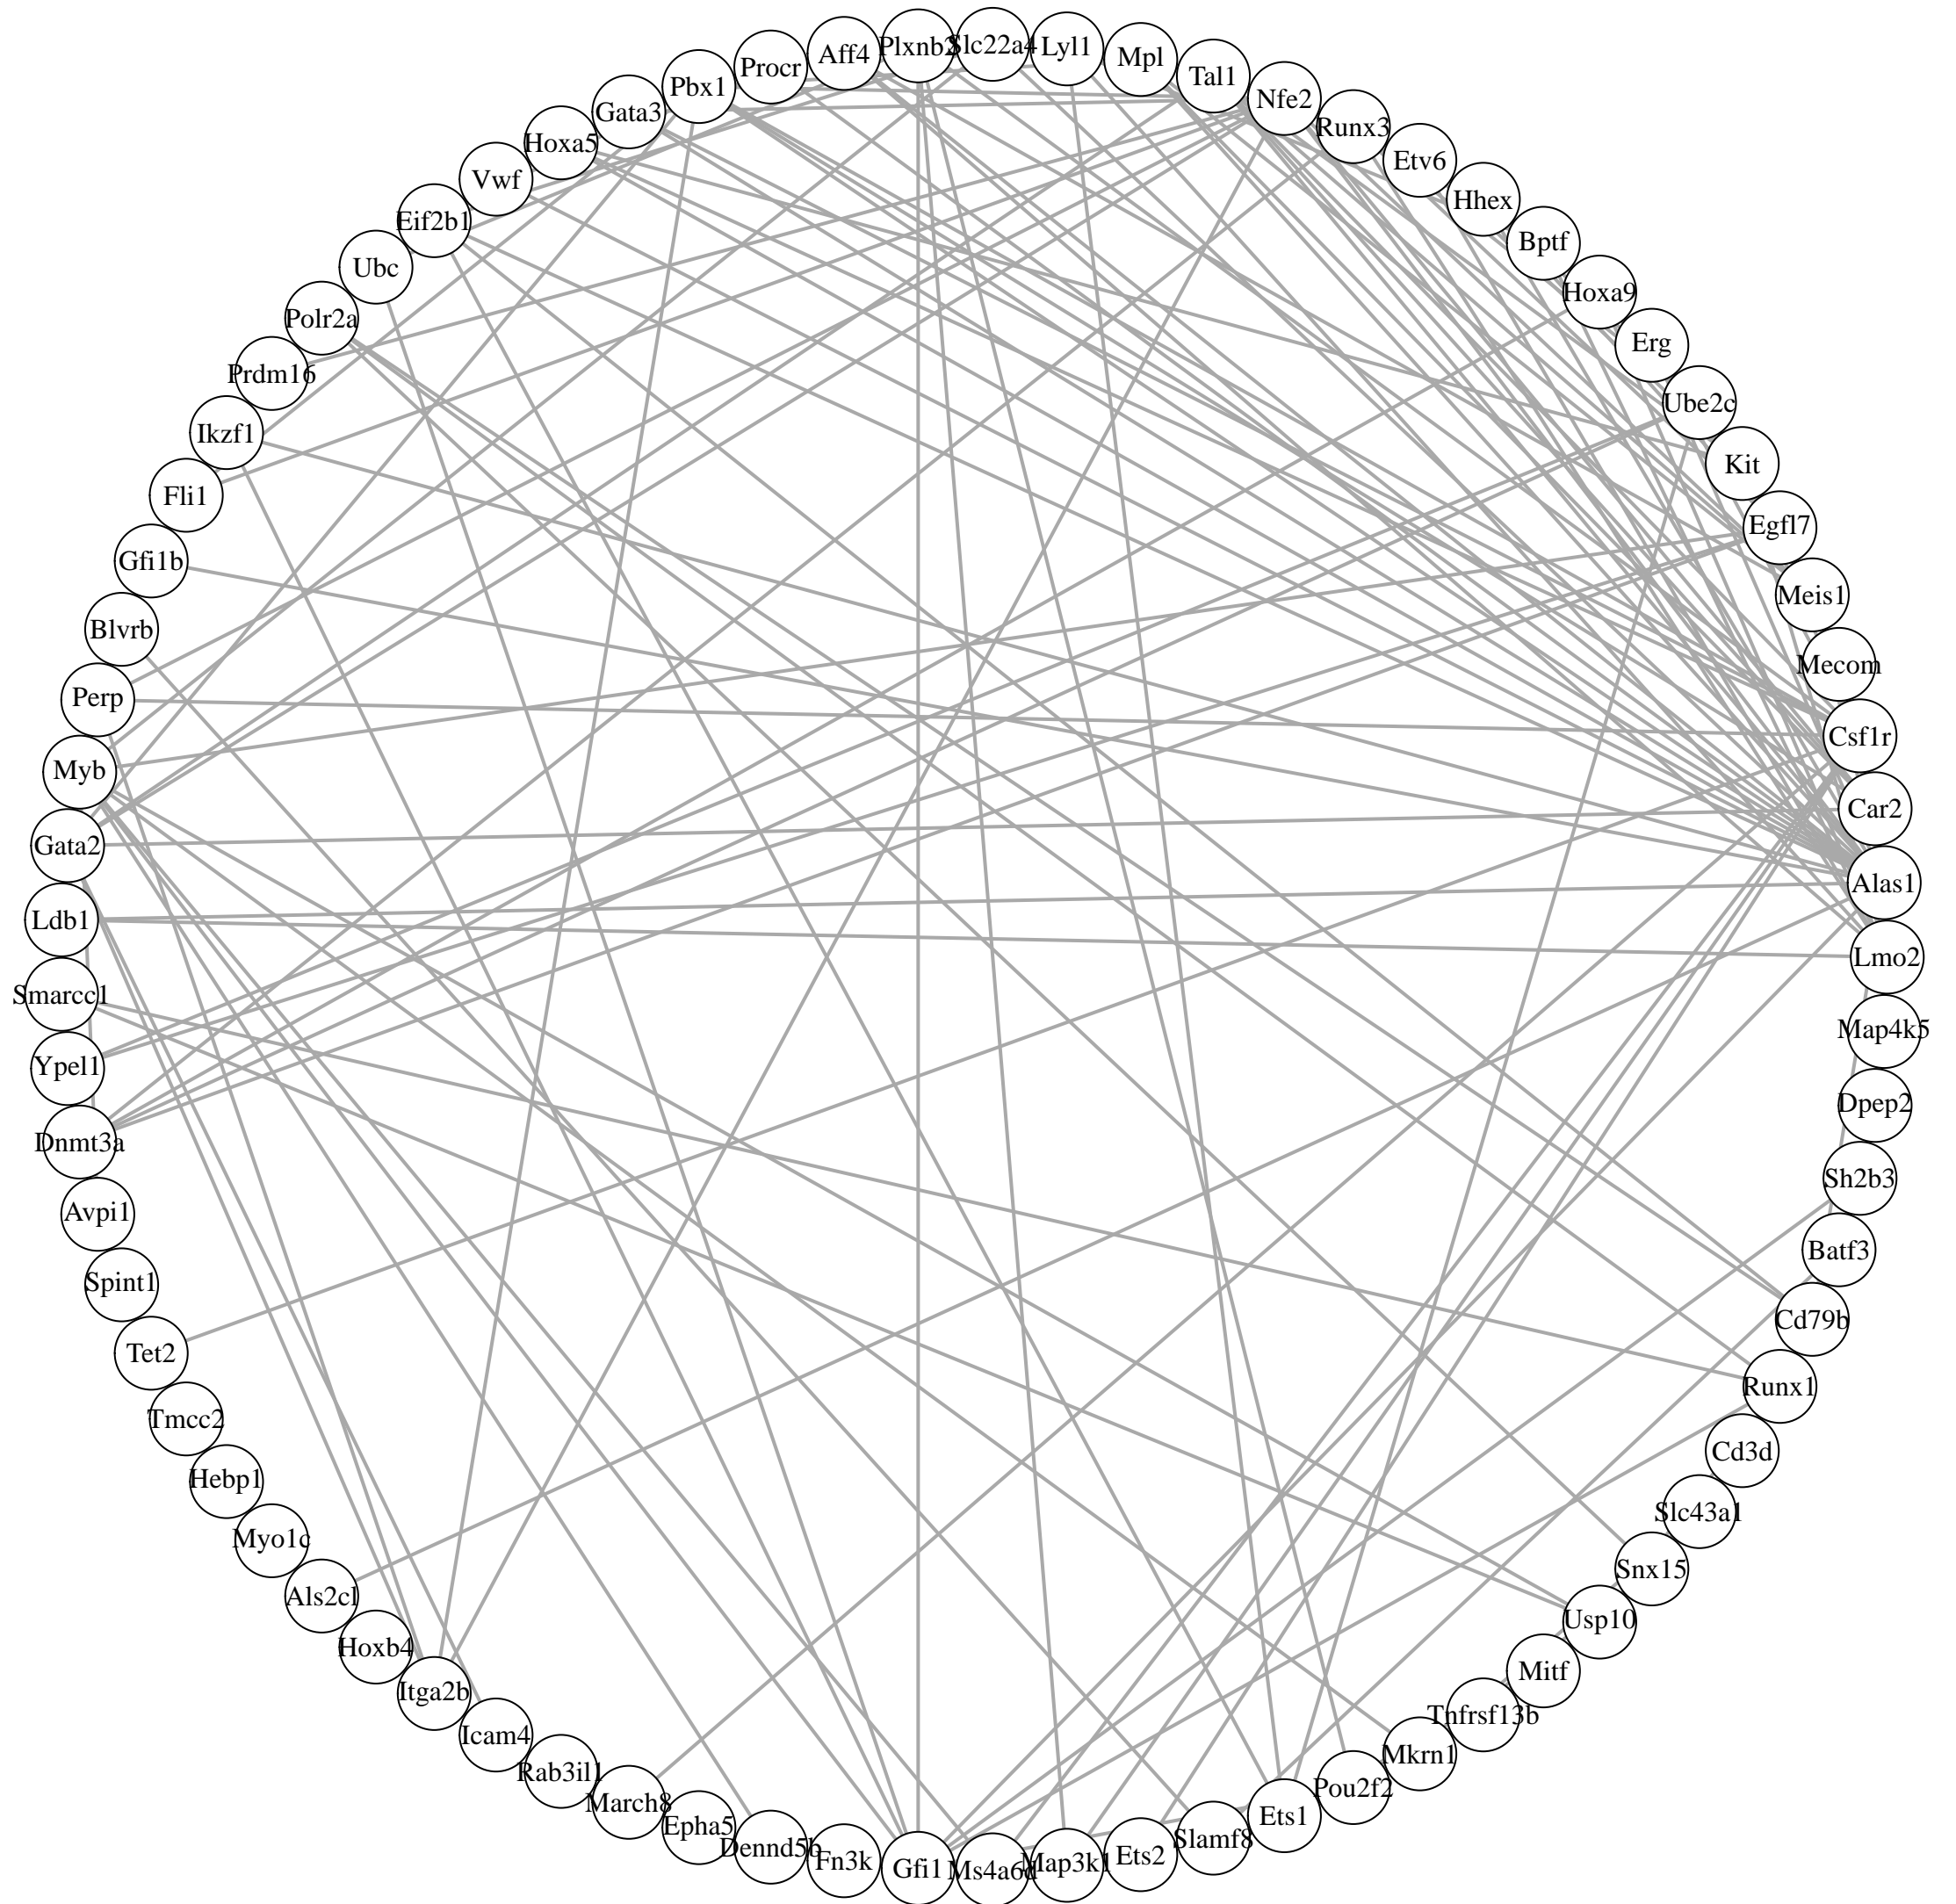

mouse\_HSCtoGMP\_time 21



mouse\_HSCtoGMP\_time 22



mouse\_HSCtoGMP\_time 23

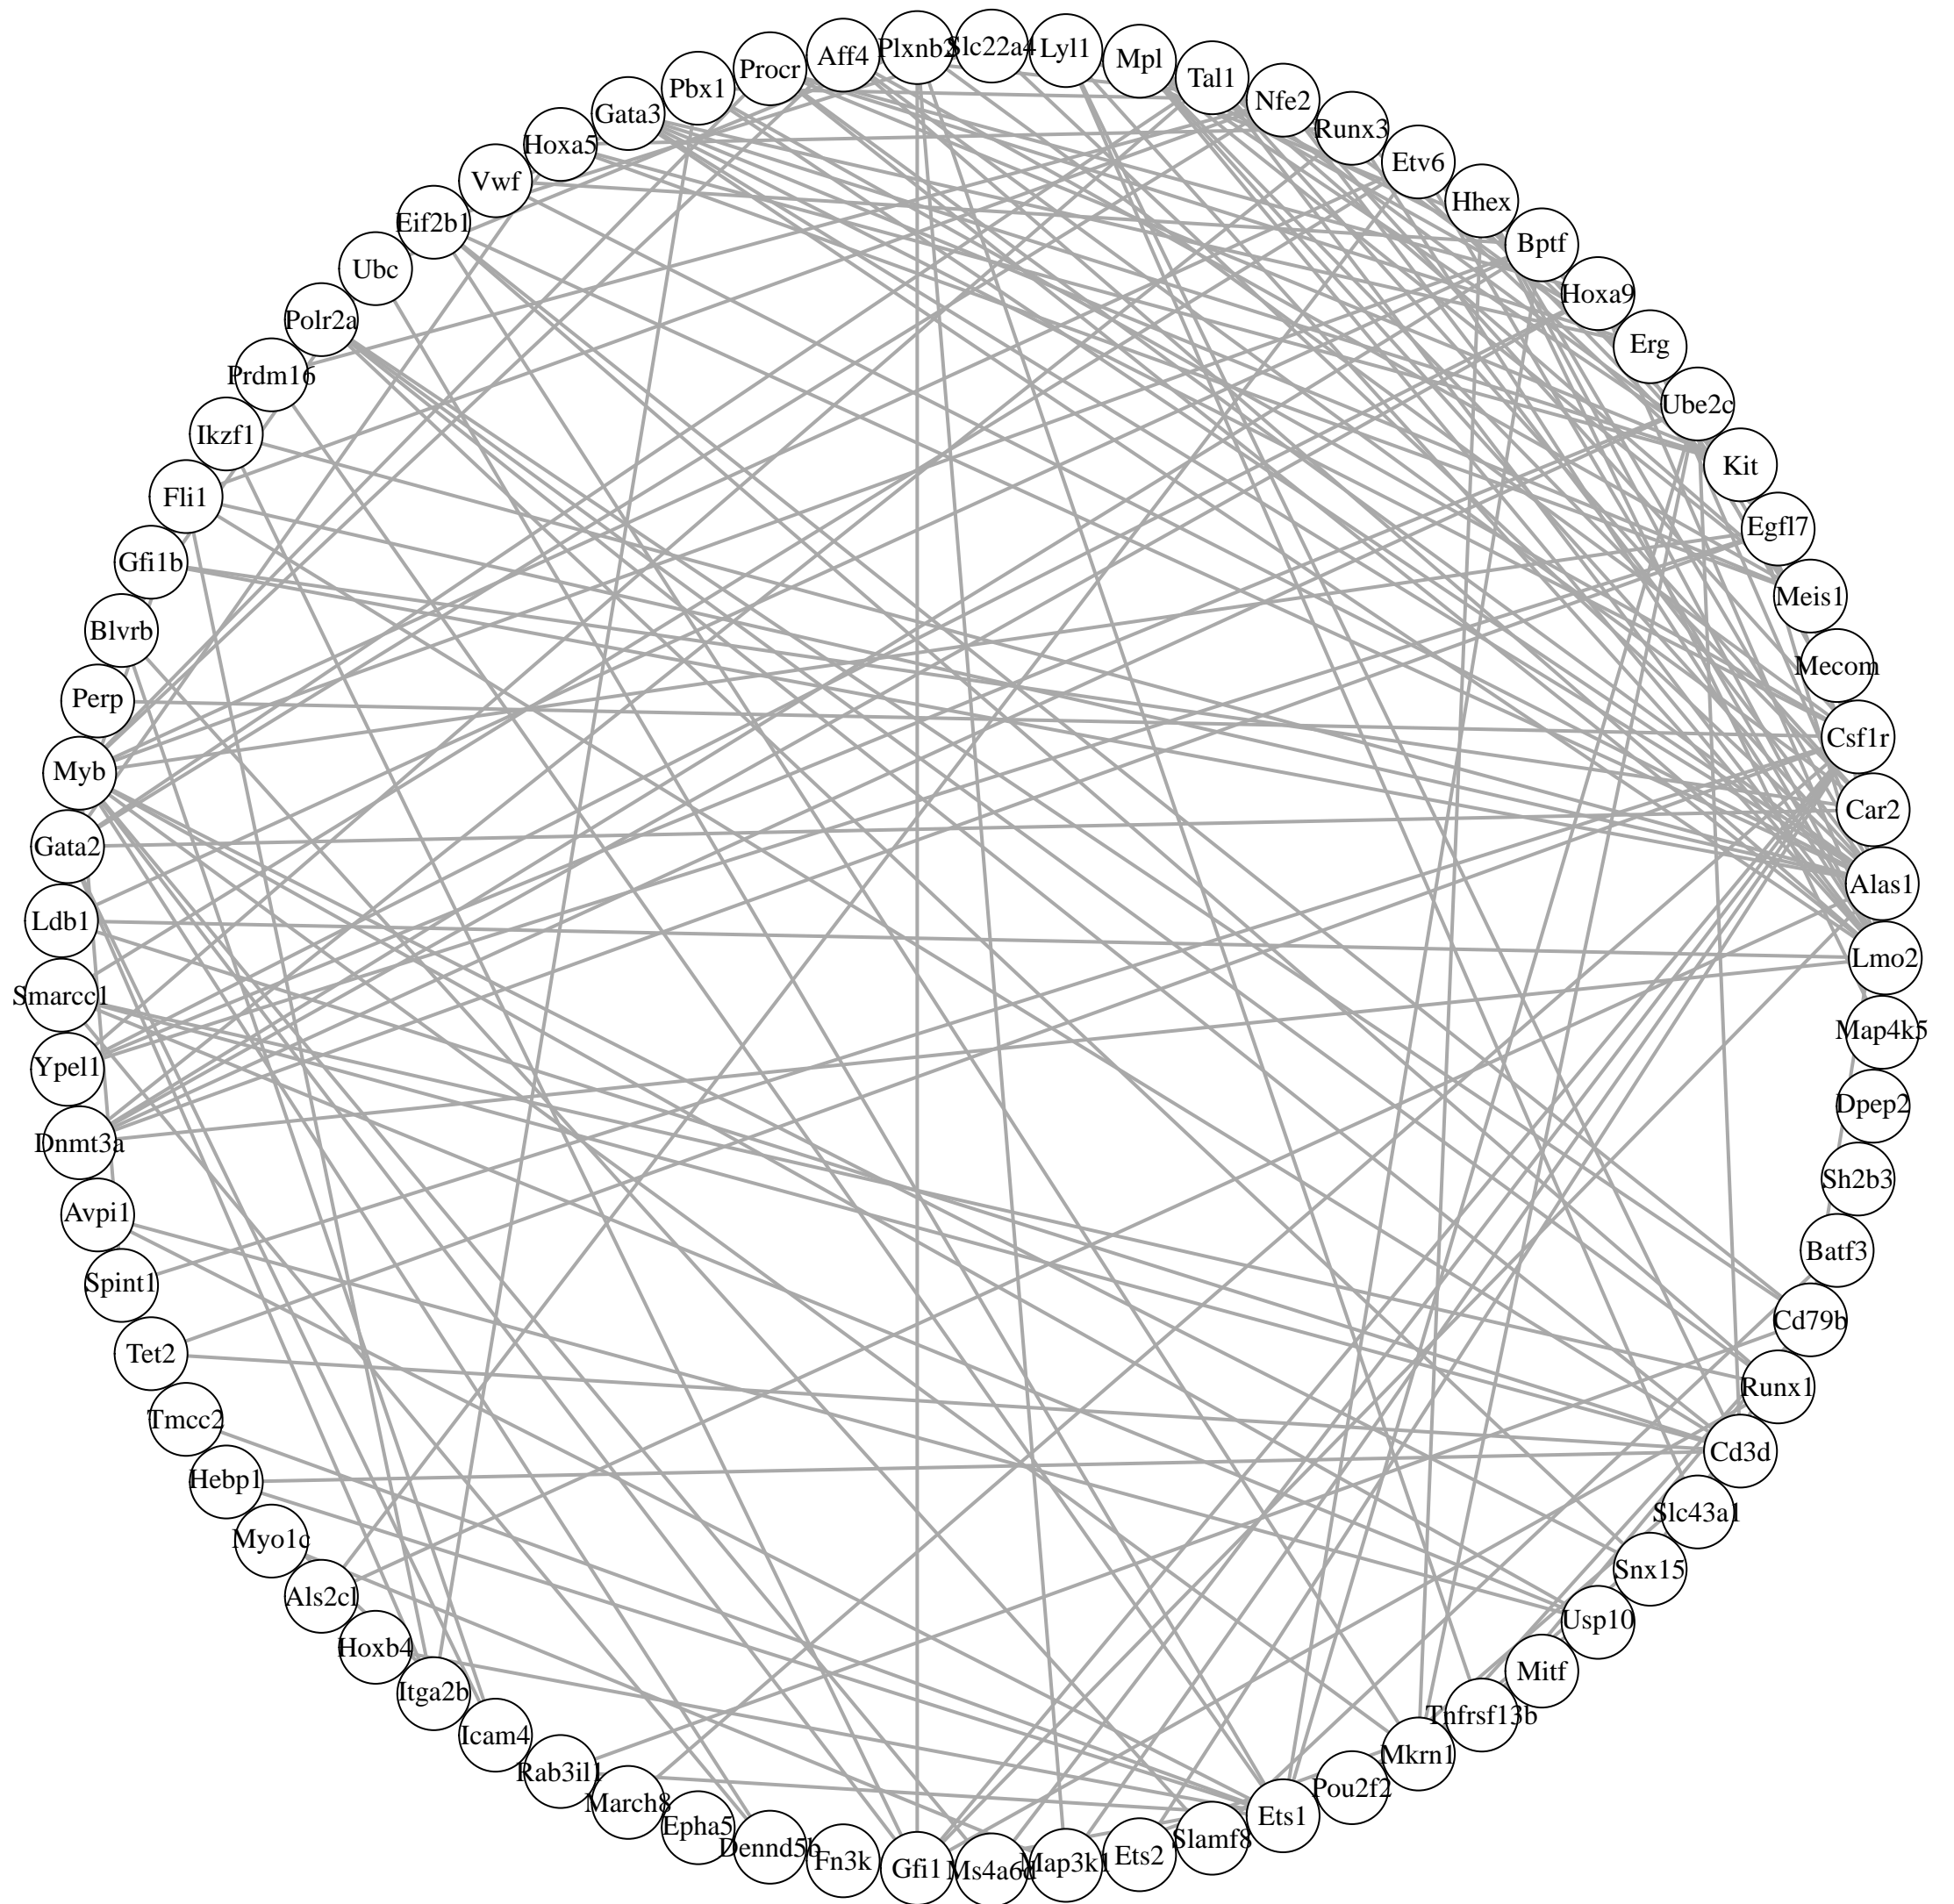



mouse\_HSCtoGMP\_time 24

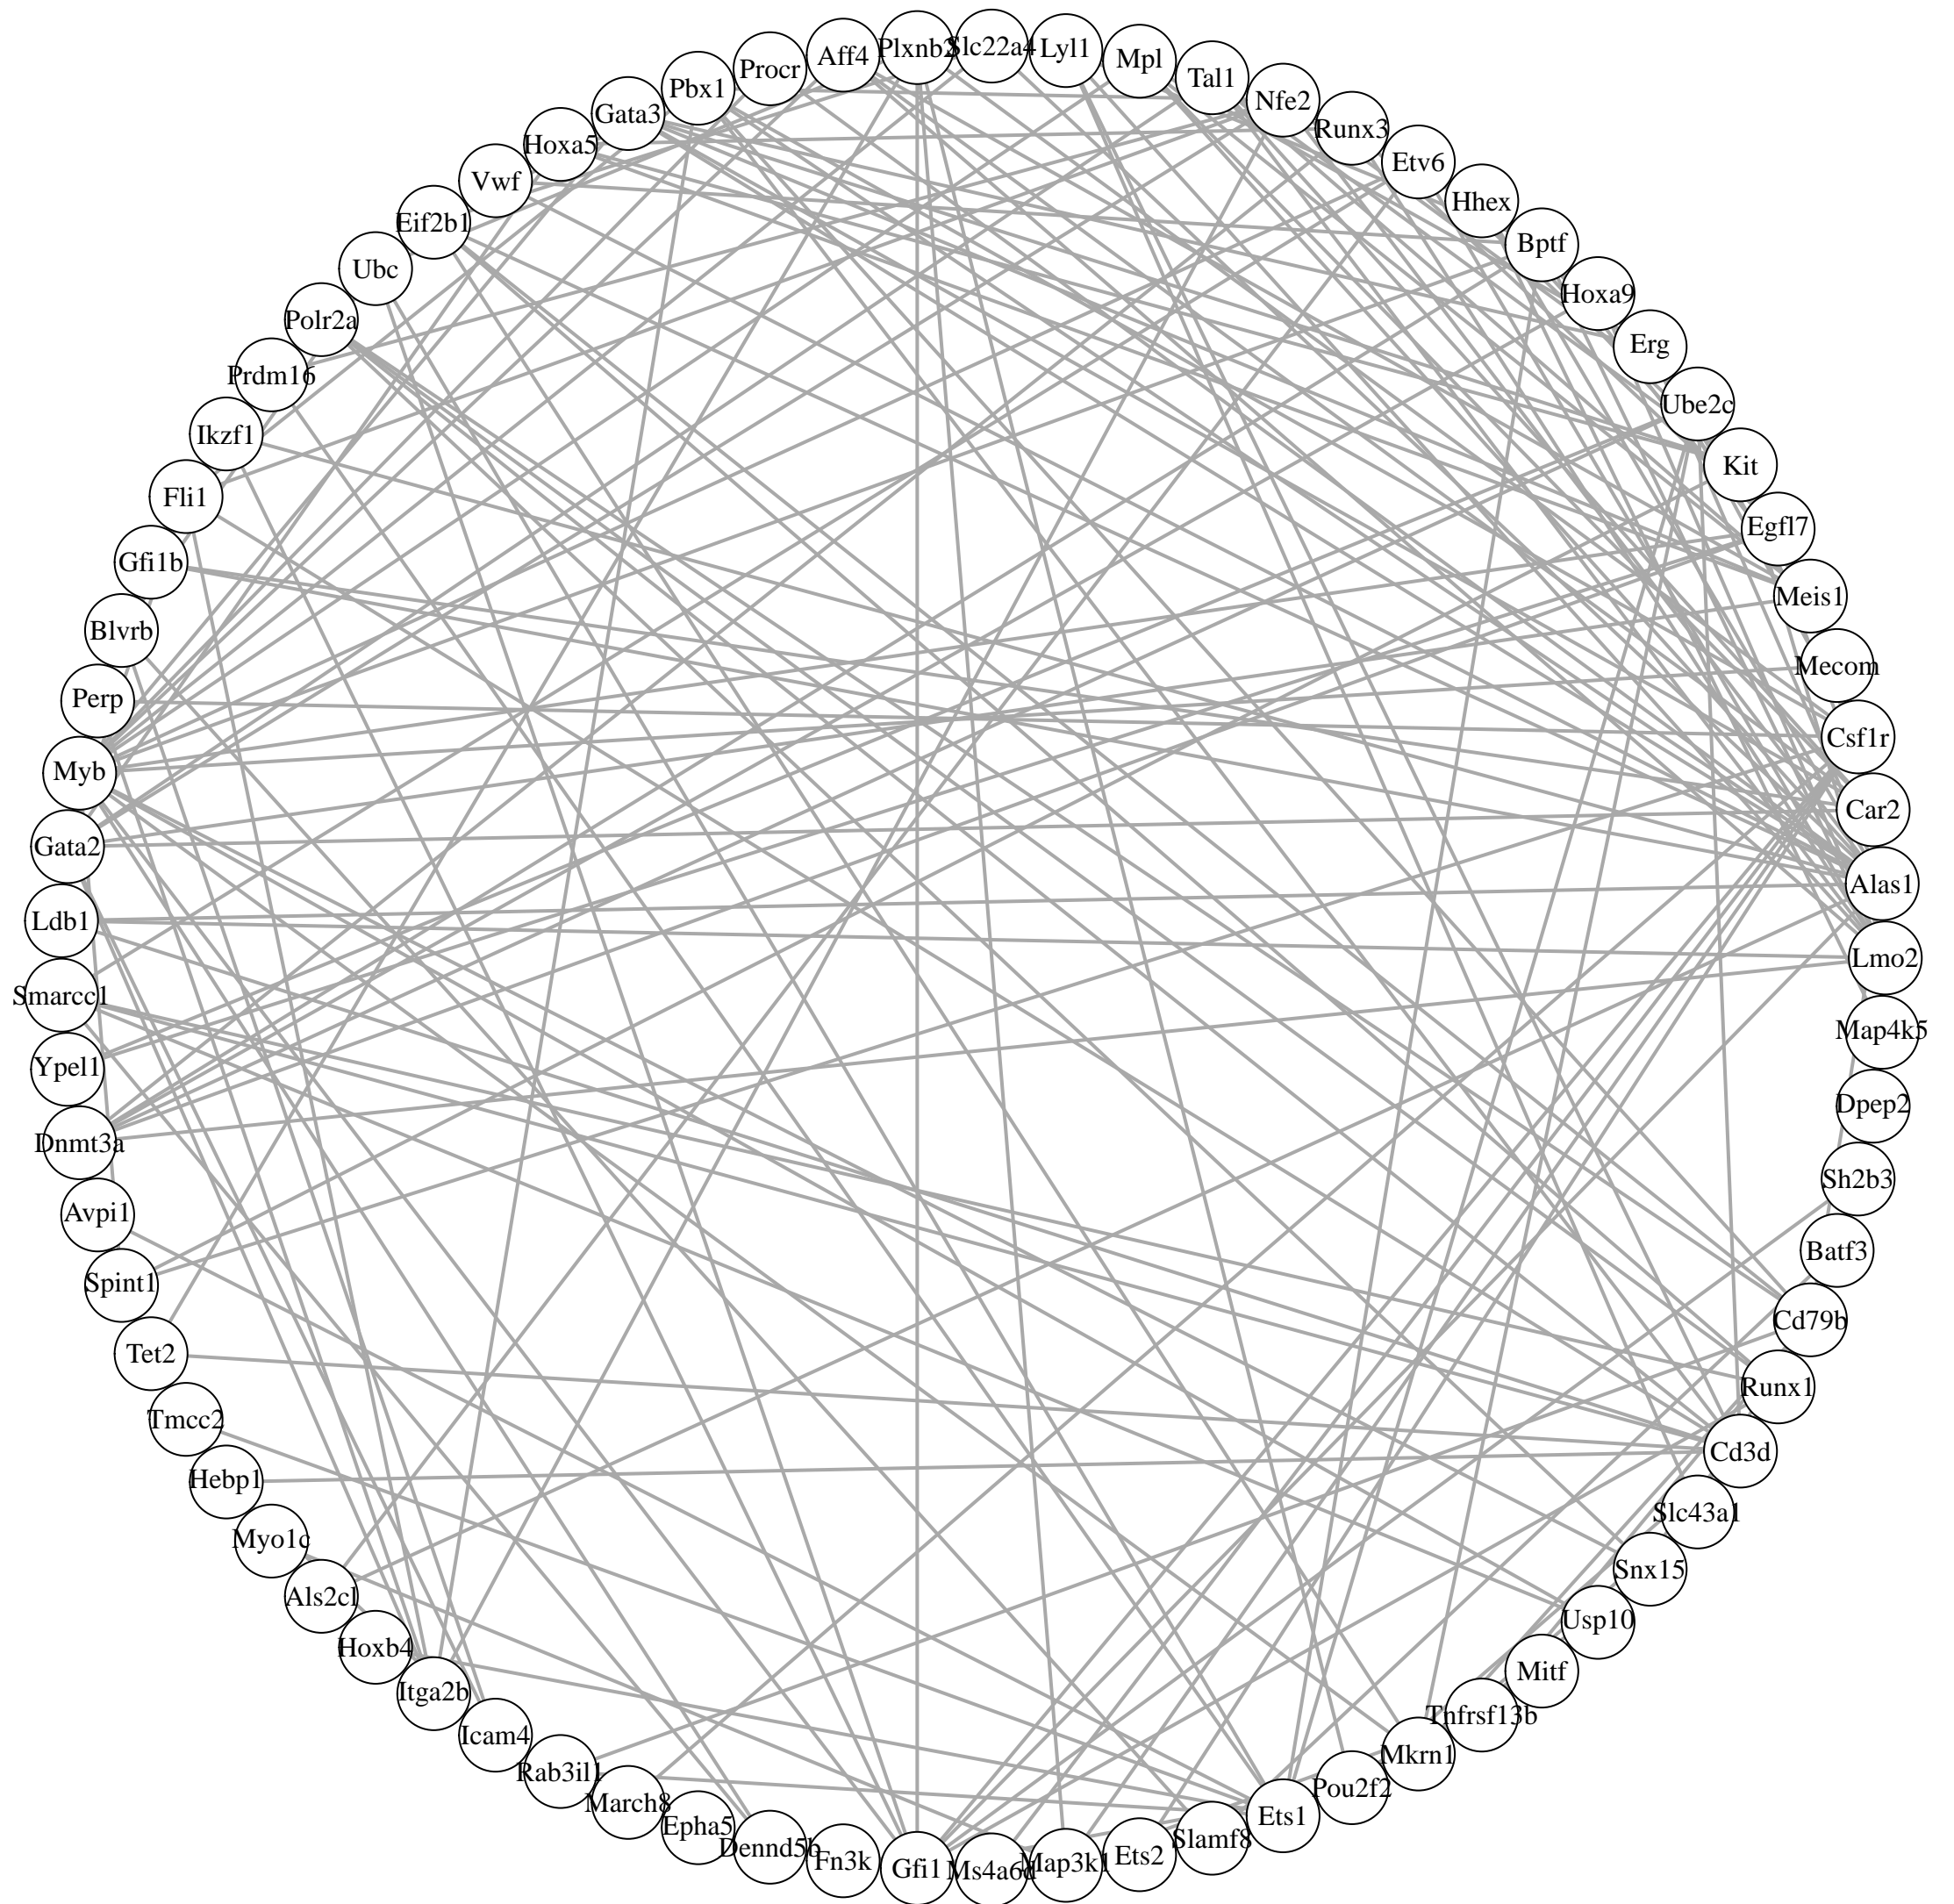

mouse\_HSCtoGMP\_time 25

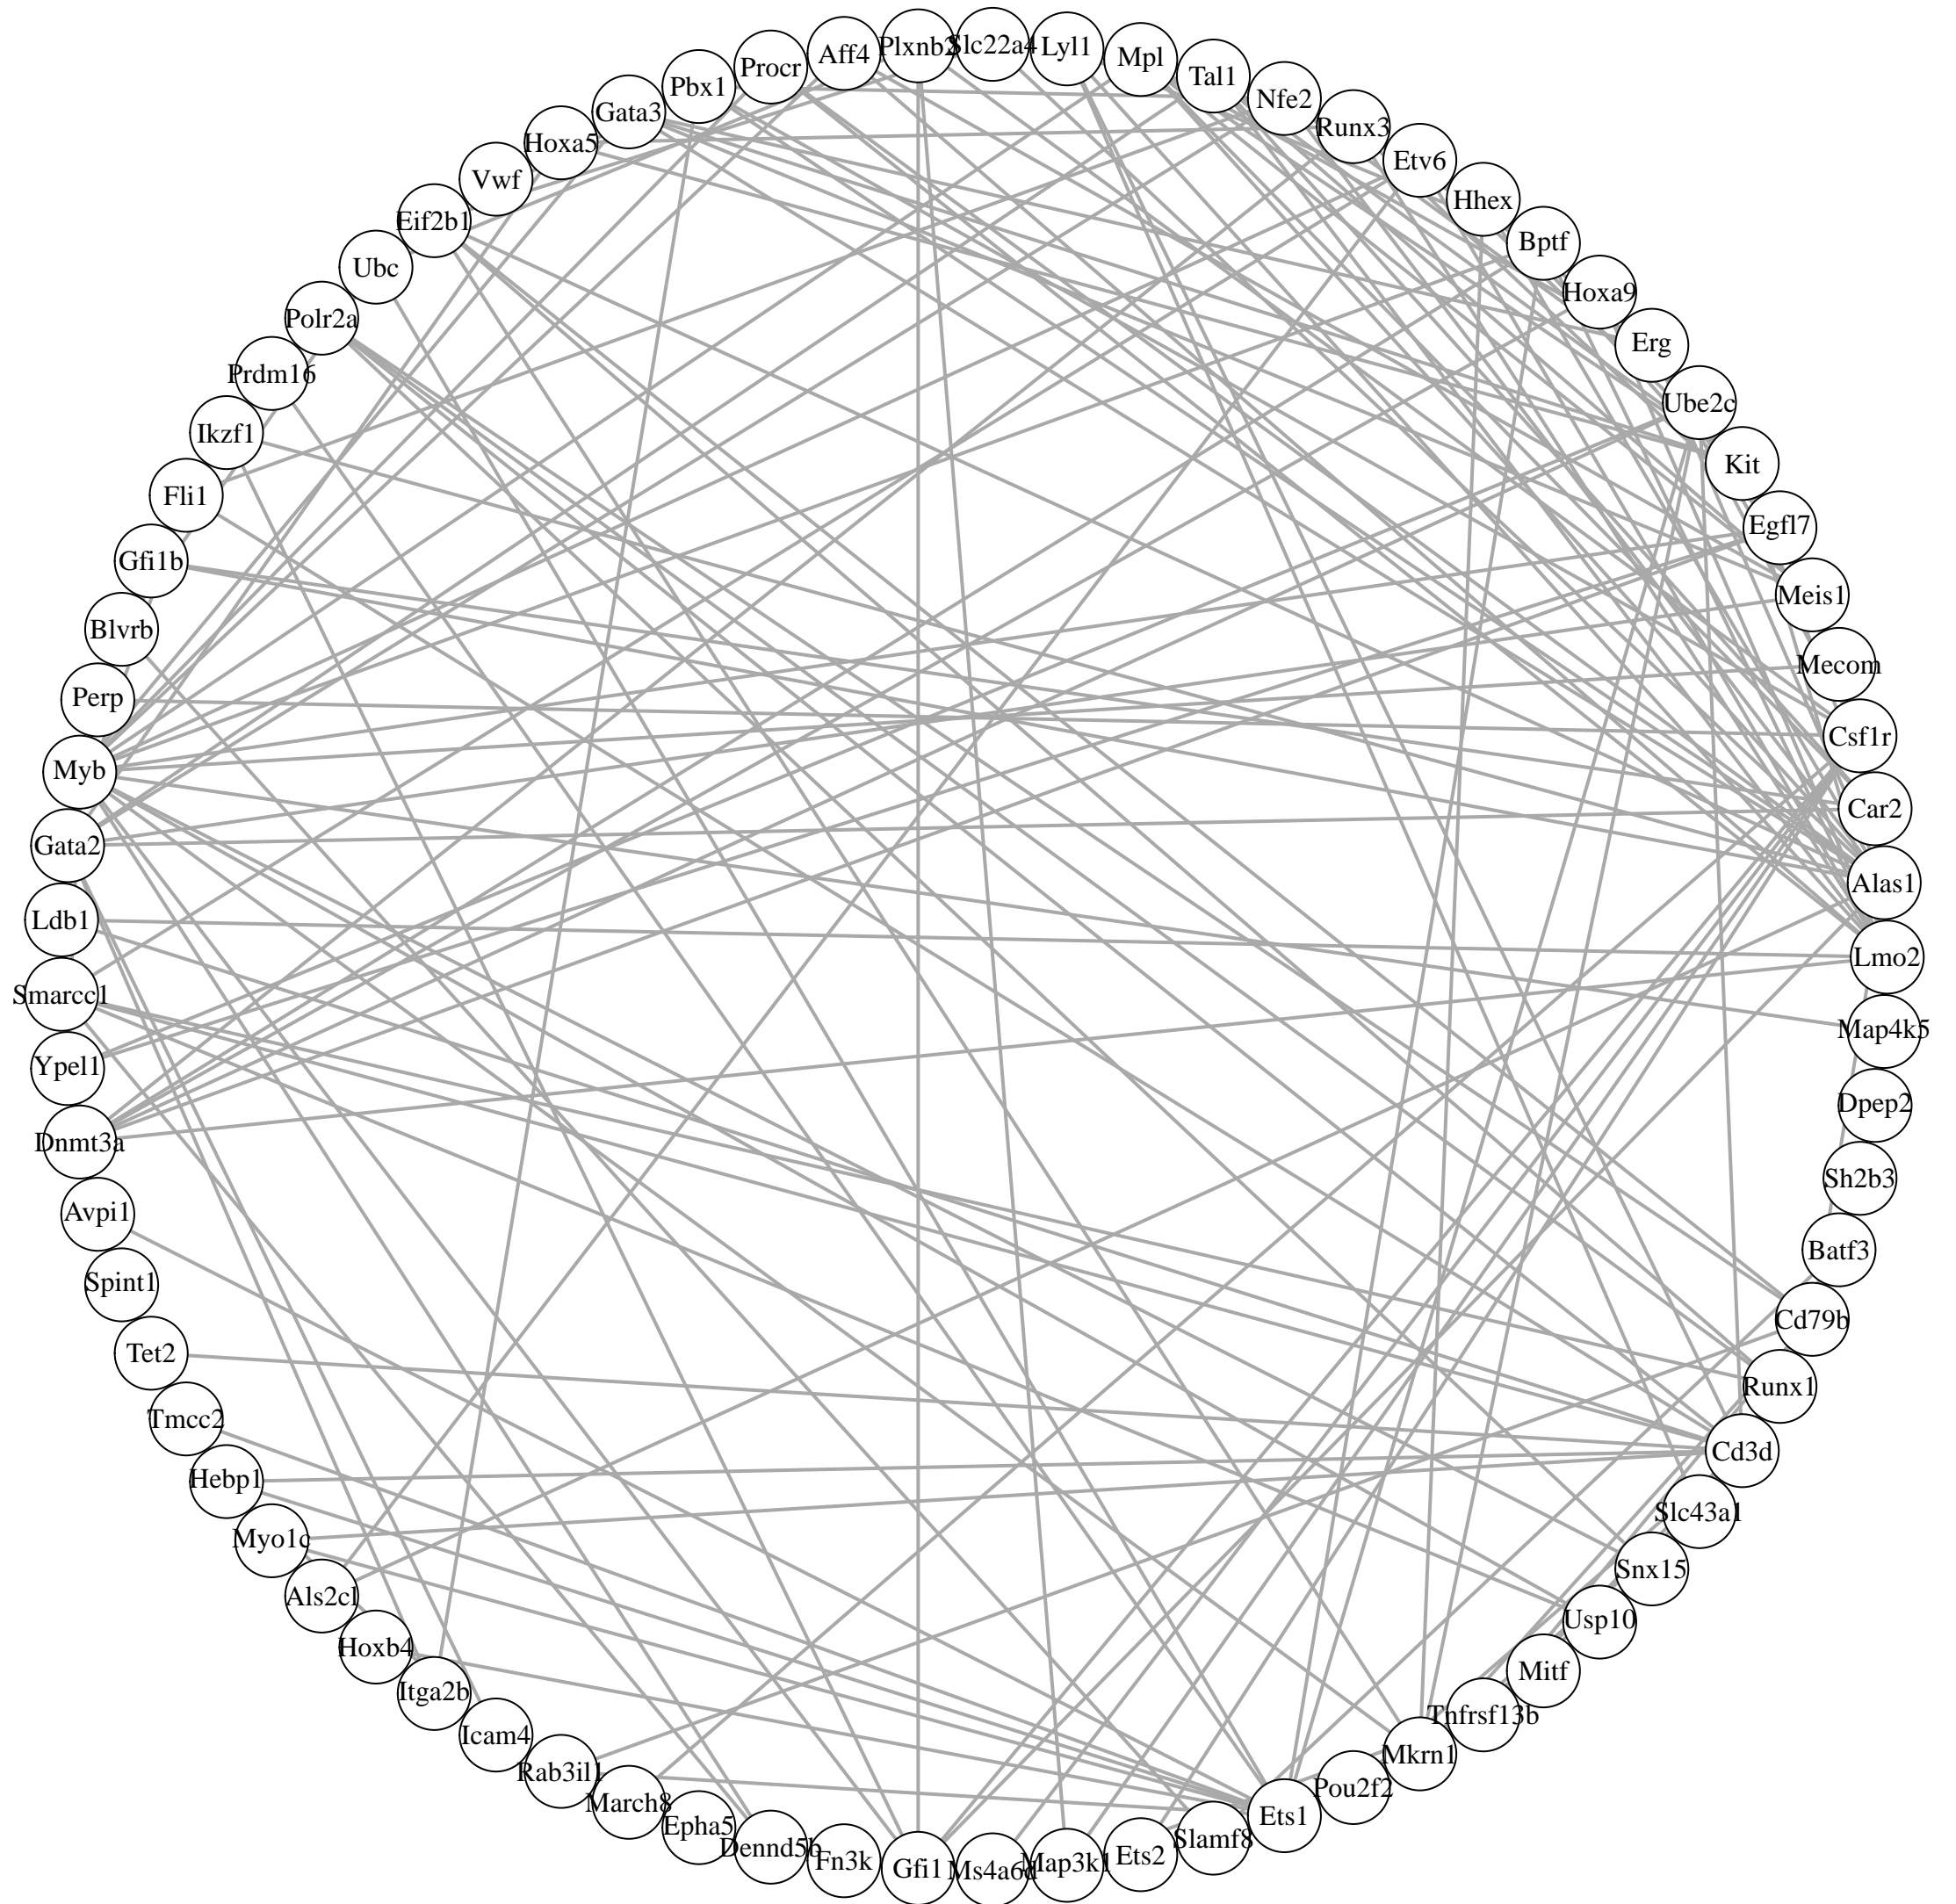

mouse\_HSCtoLMPP\_time 1

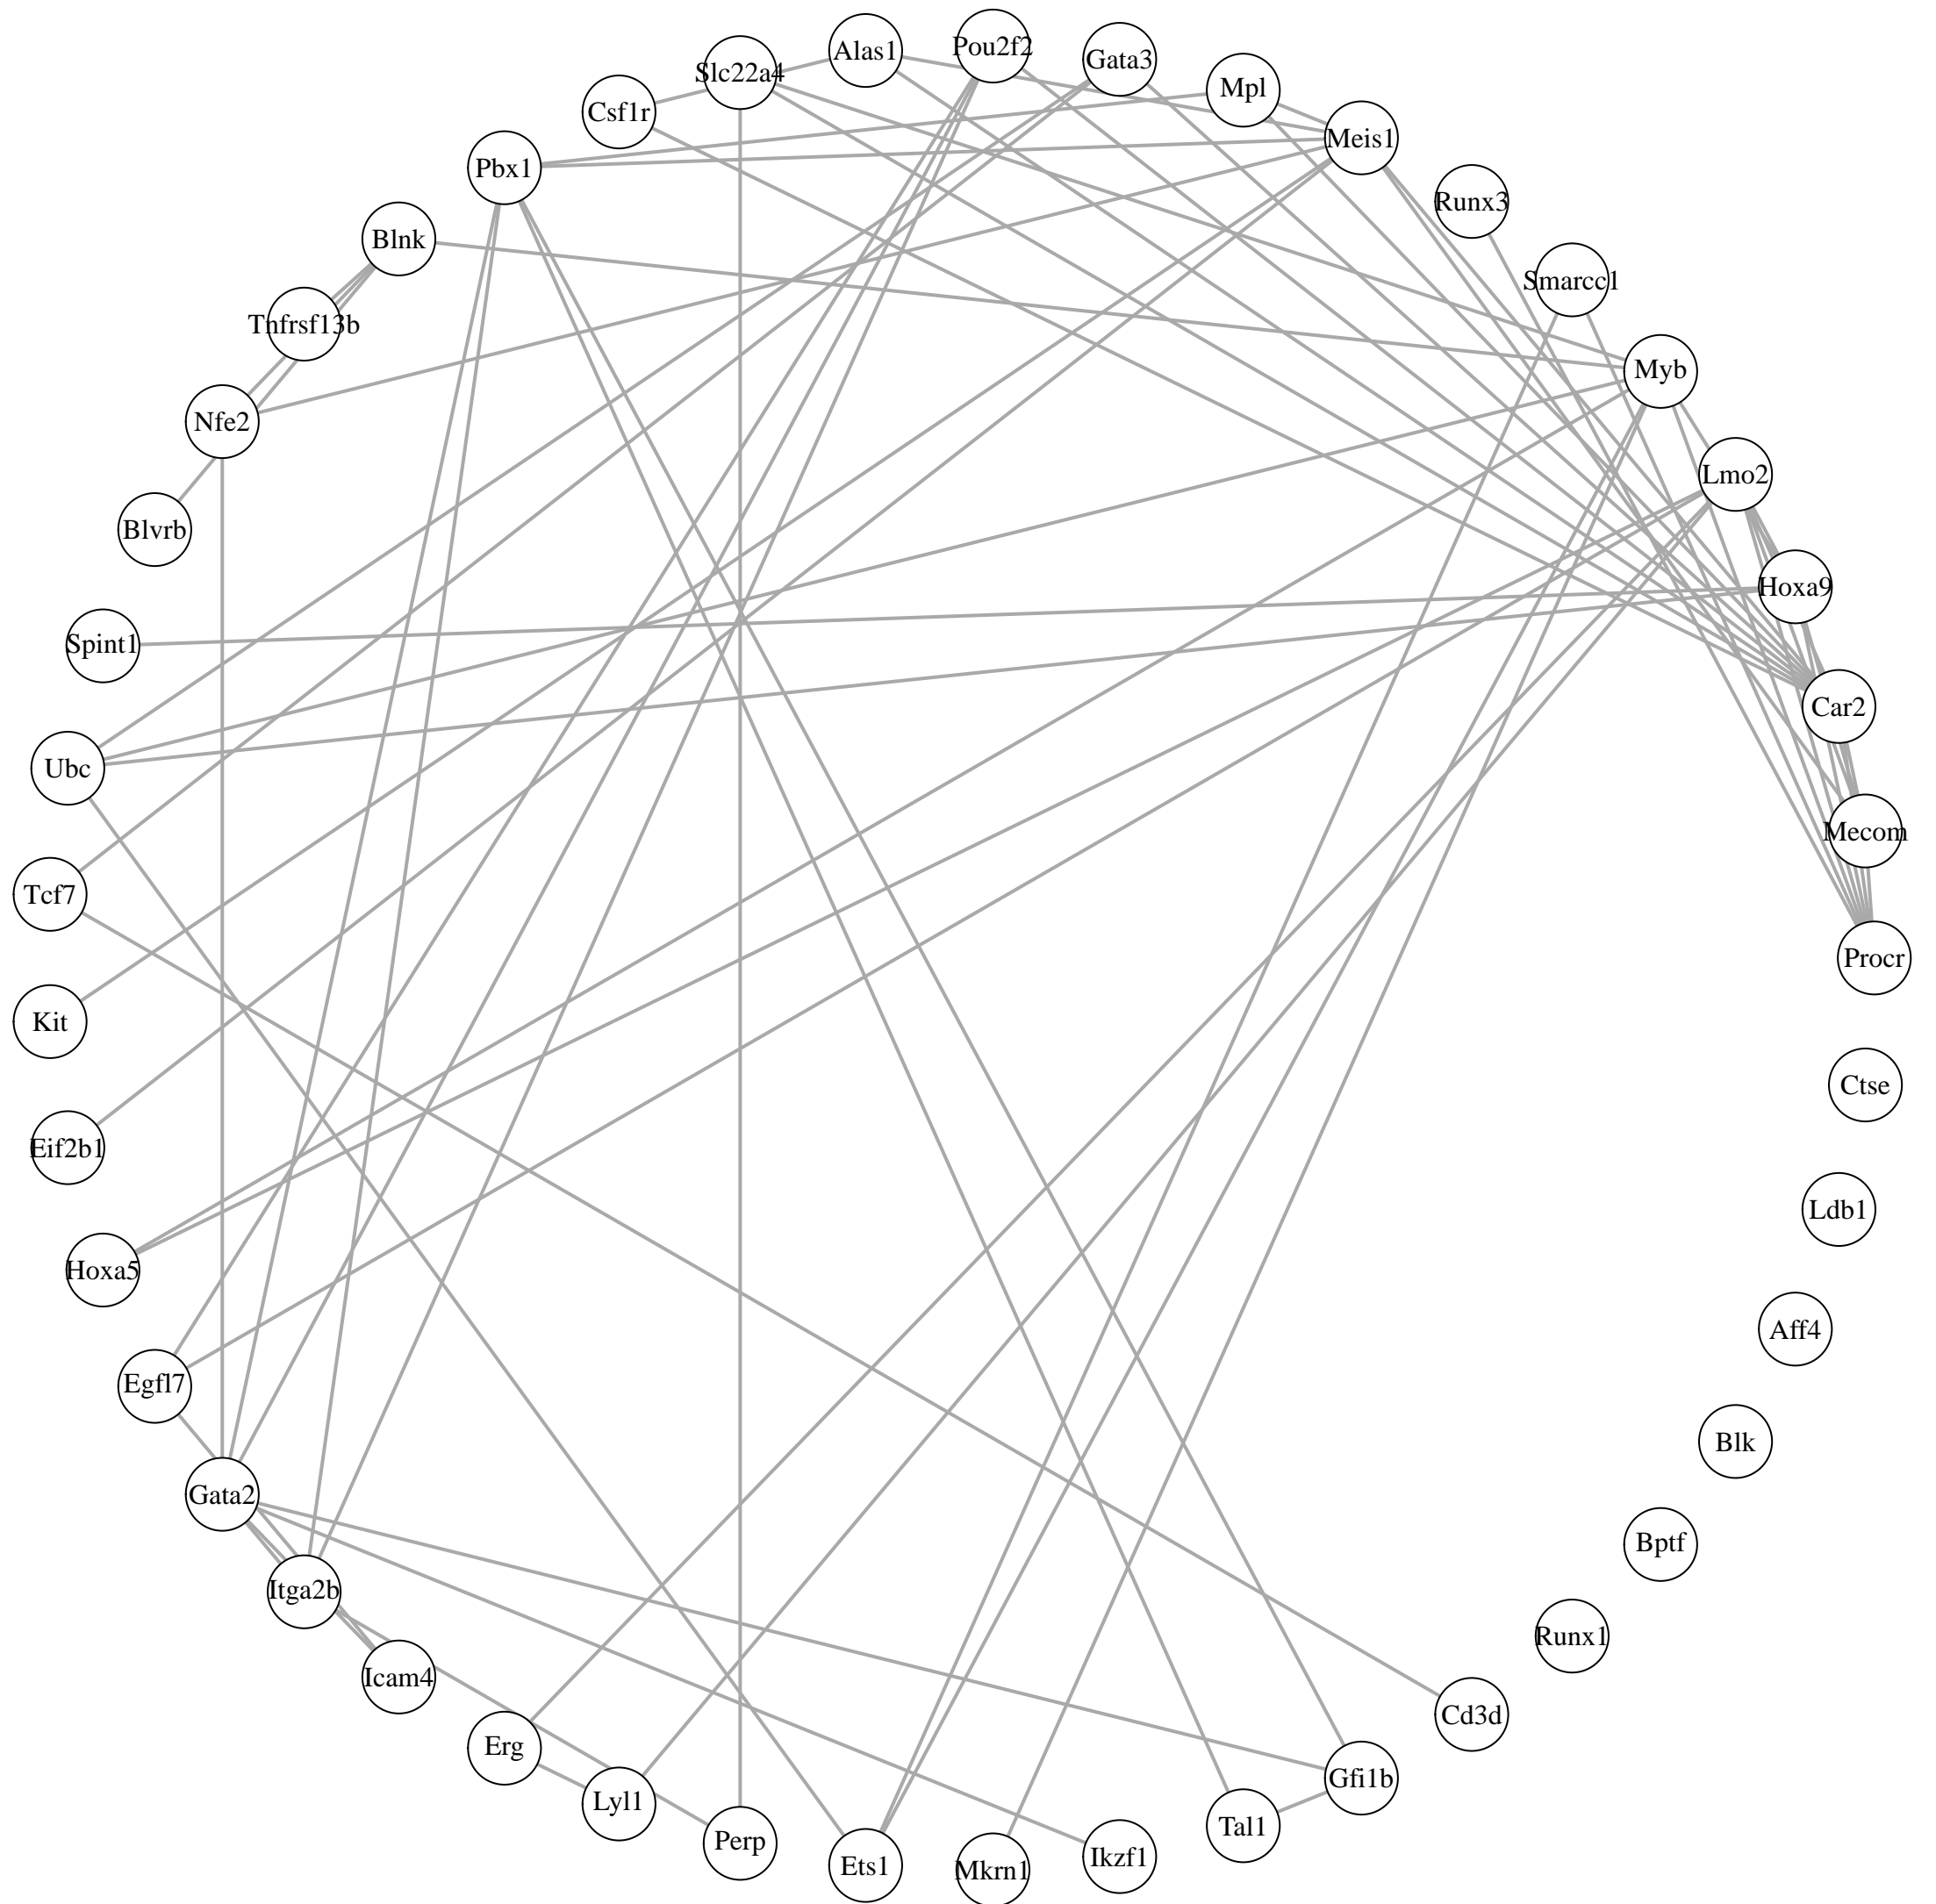

mouse\_HSCtoLMPP\_time 2





mouse\_HSCtoLMPP\_time 3



mouse\_HSCtoLMPP\_time 4



mouse\_HSCtoLMPP\_time 5



mouse\_HSCtoLMPP\_time 6





mouse\_HSCtoLMPP\_time 7

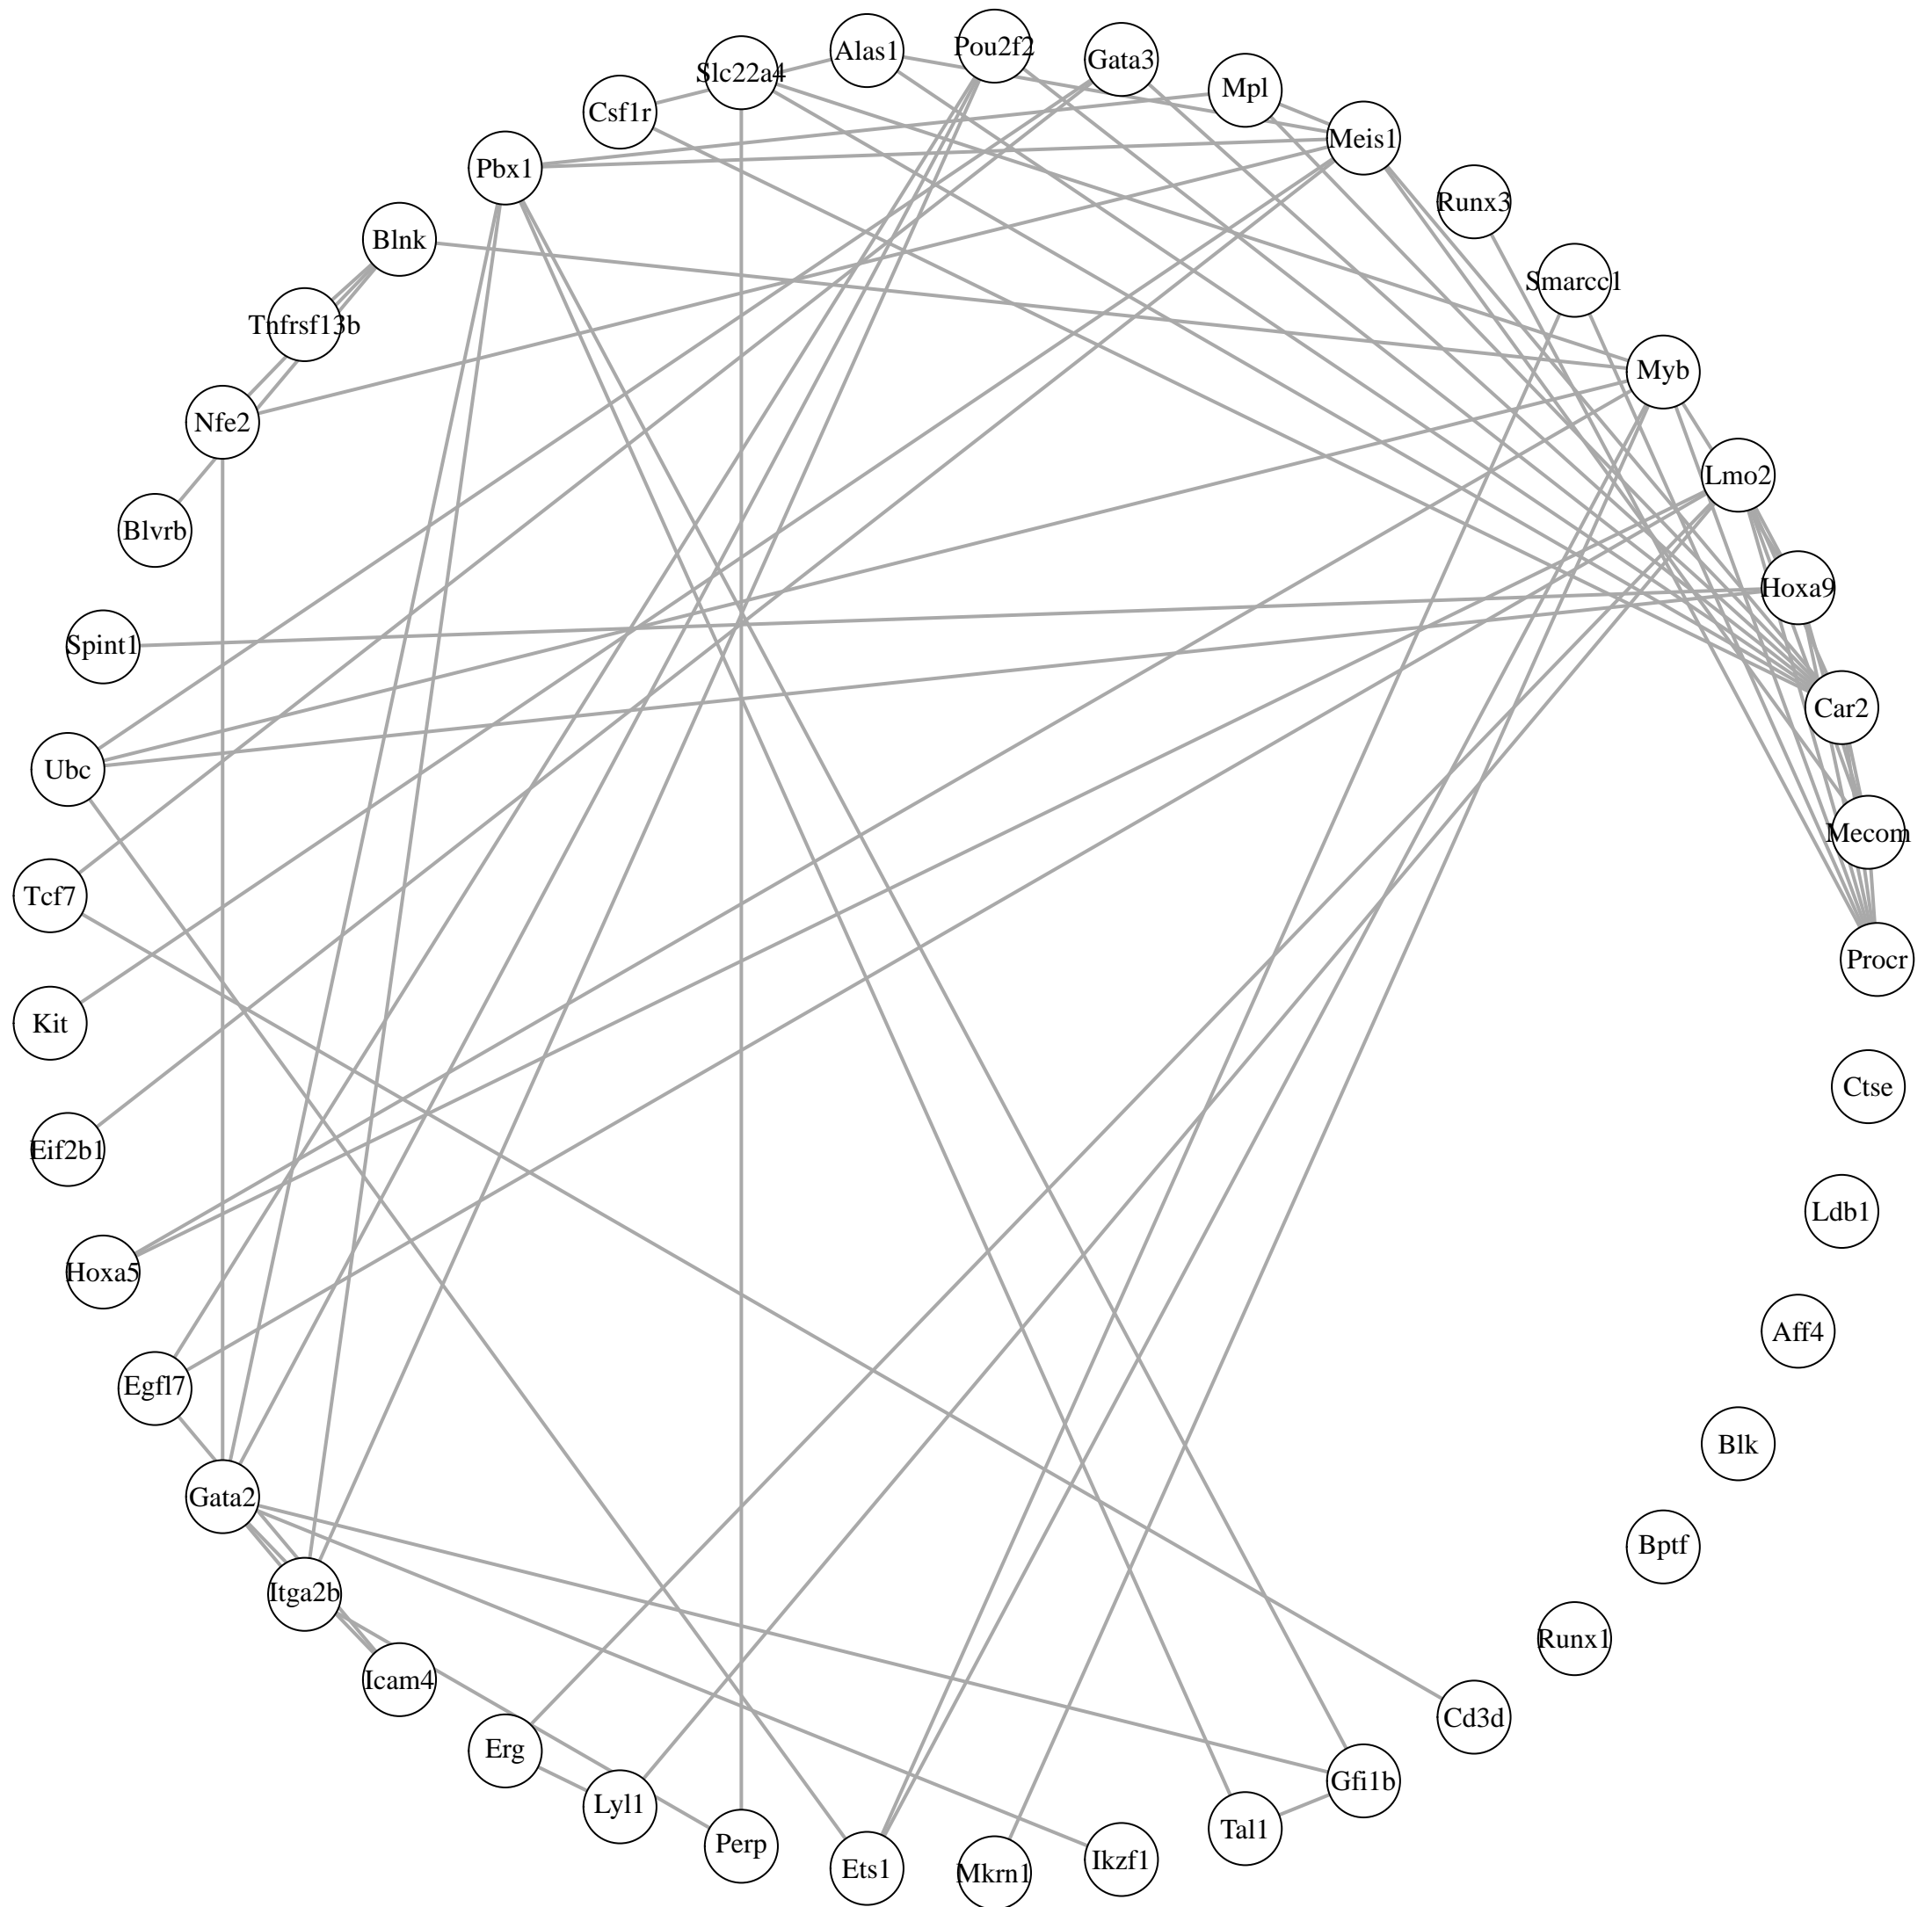

**mouse\_HSCtoLMPP\_time 8**

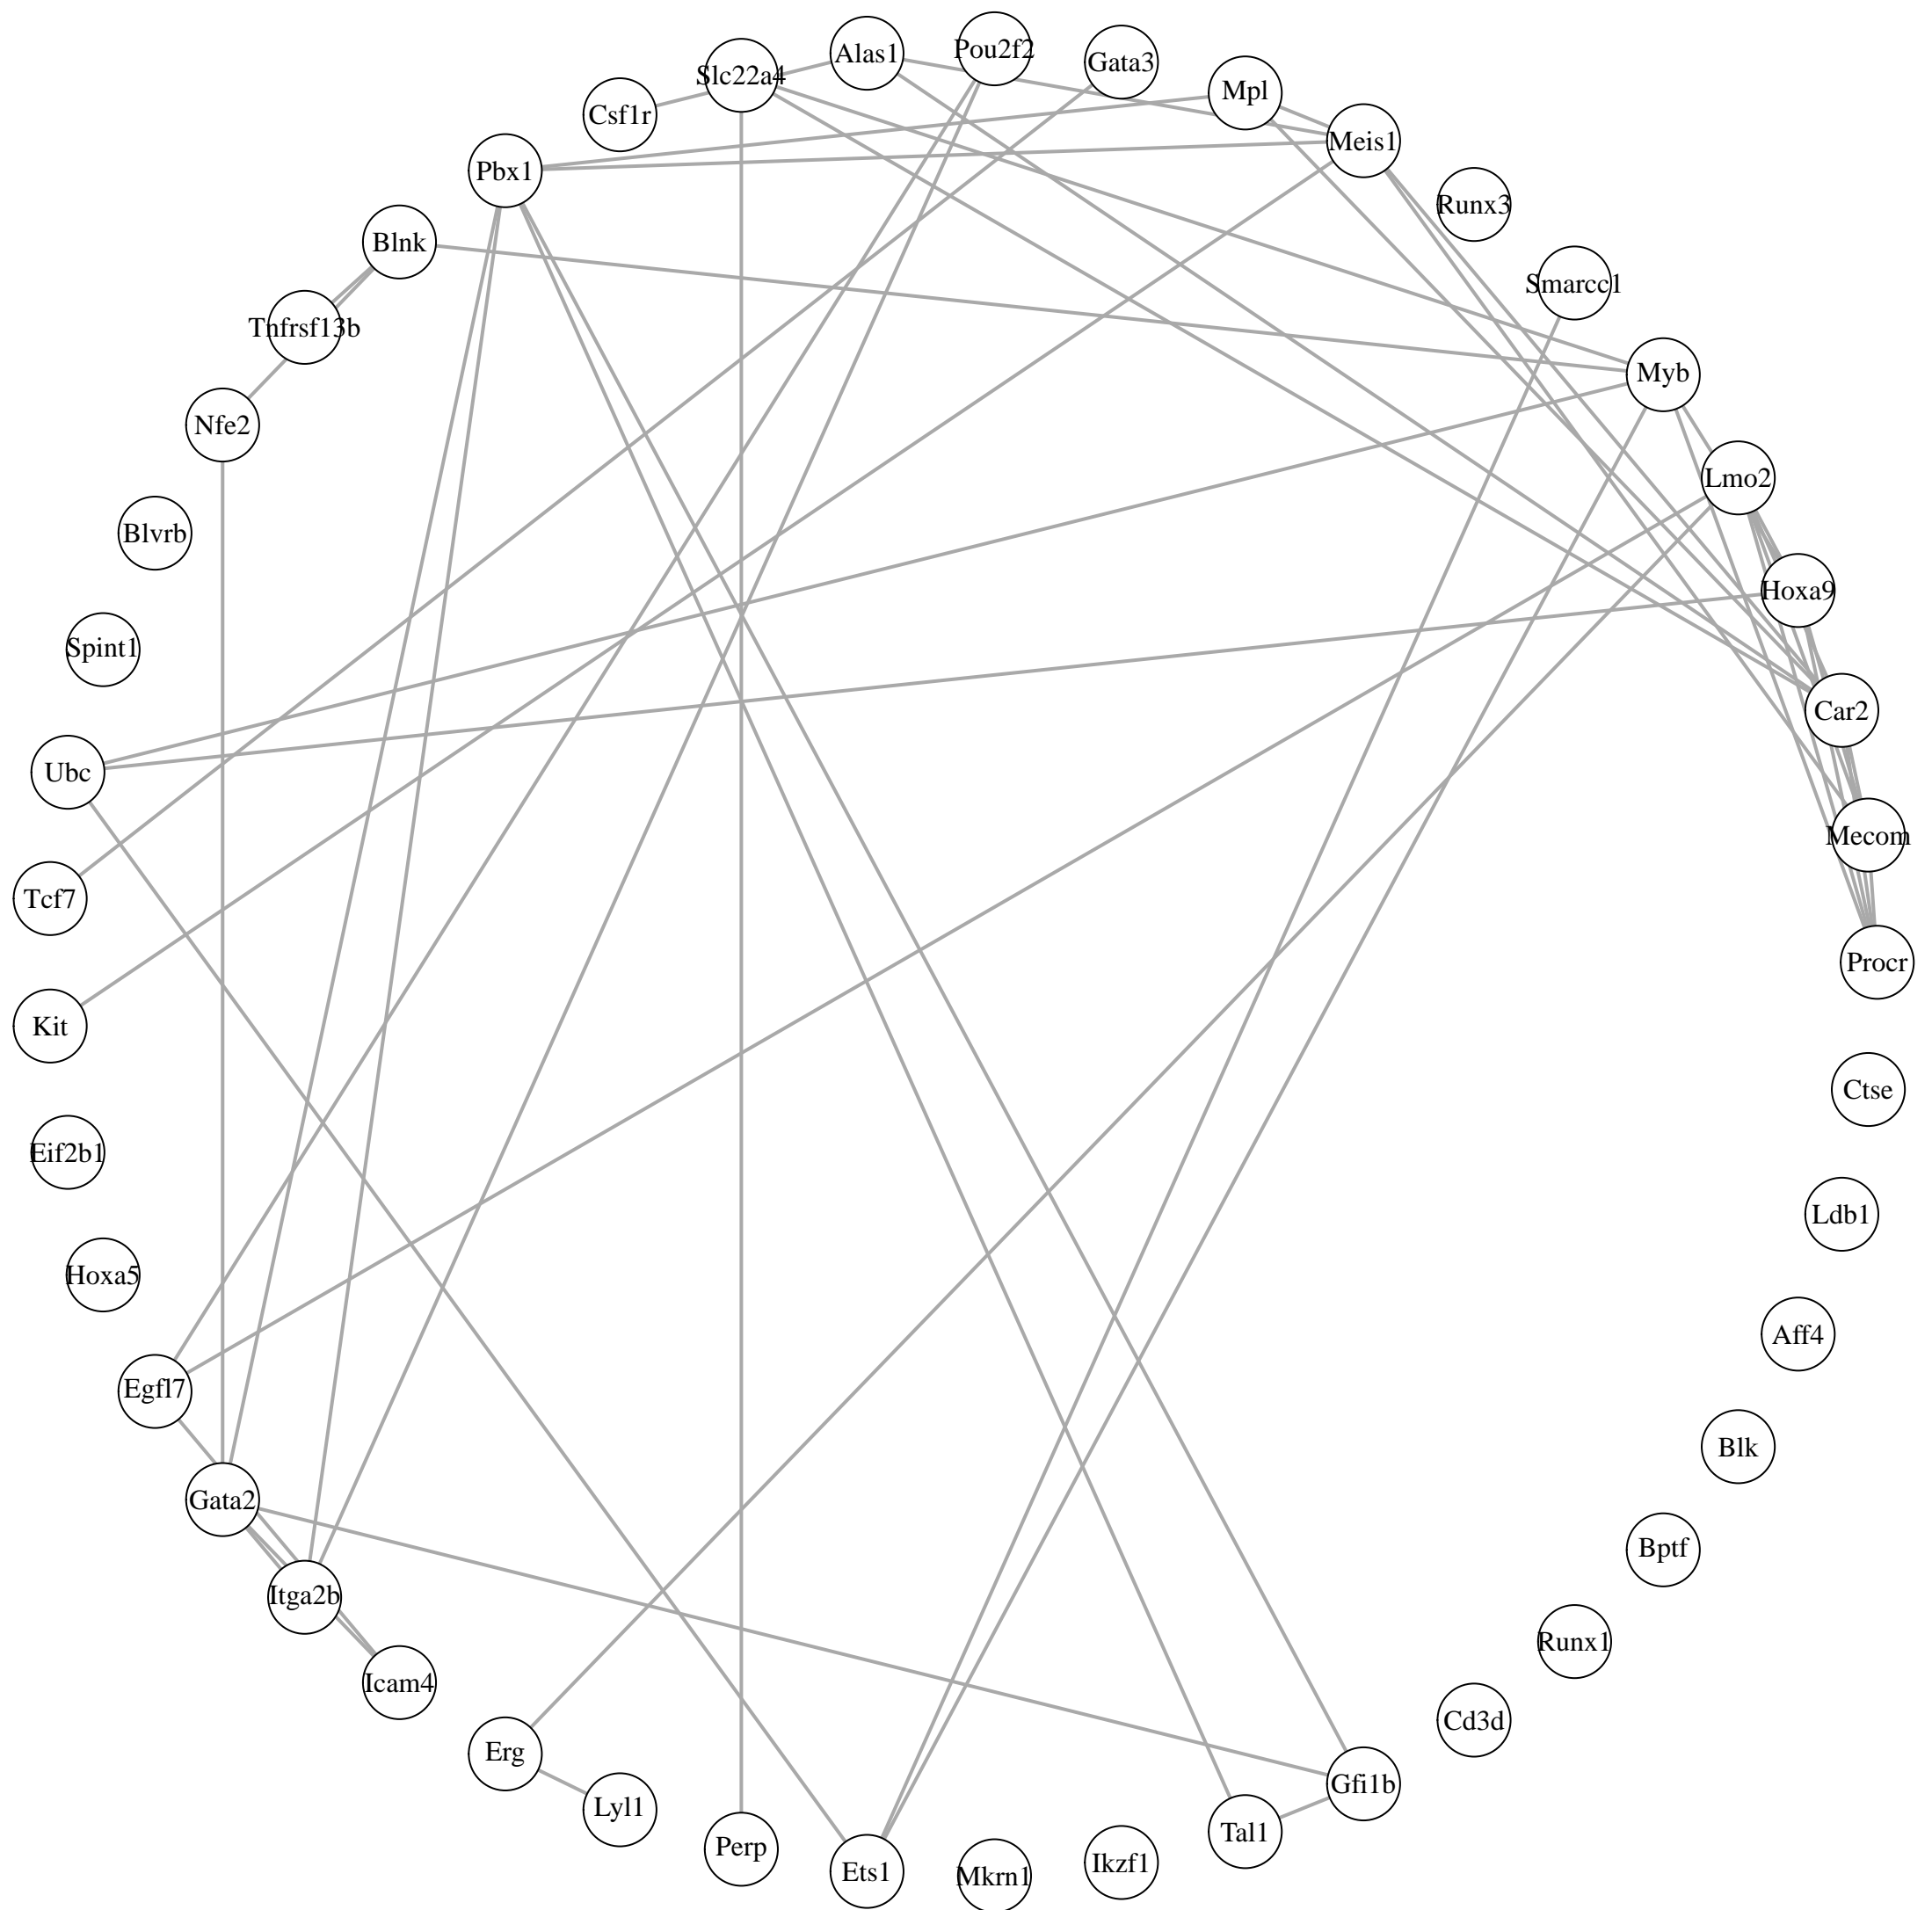

mouse\_HSCtoLMPP\_time 9



mouse\_HSCtoLMPP\_time 10

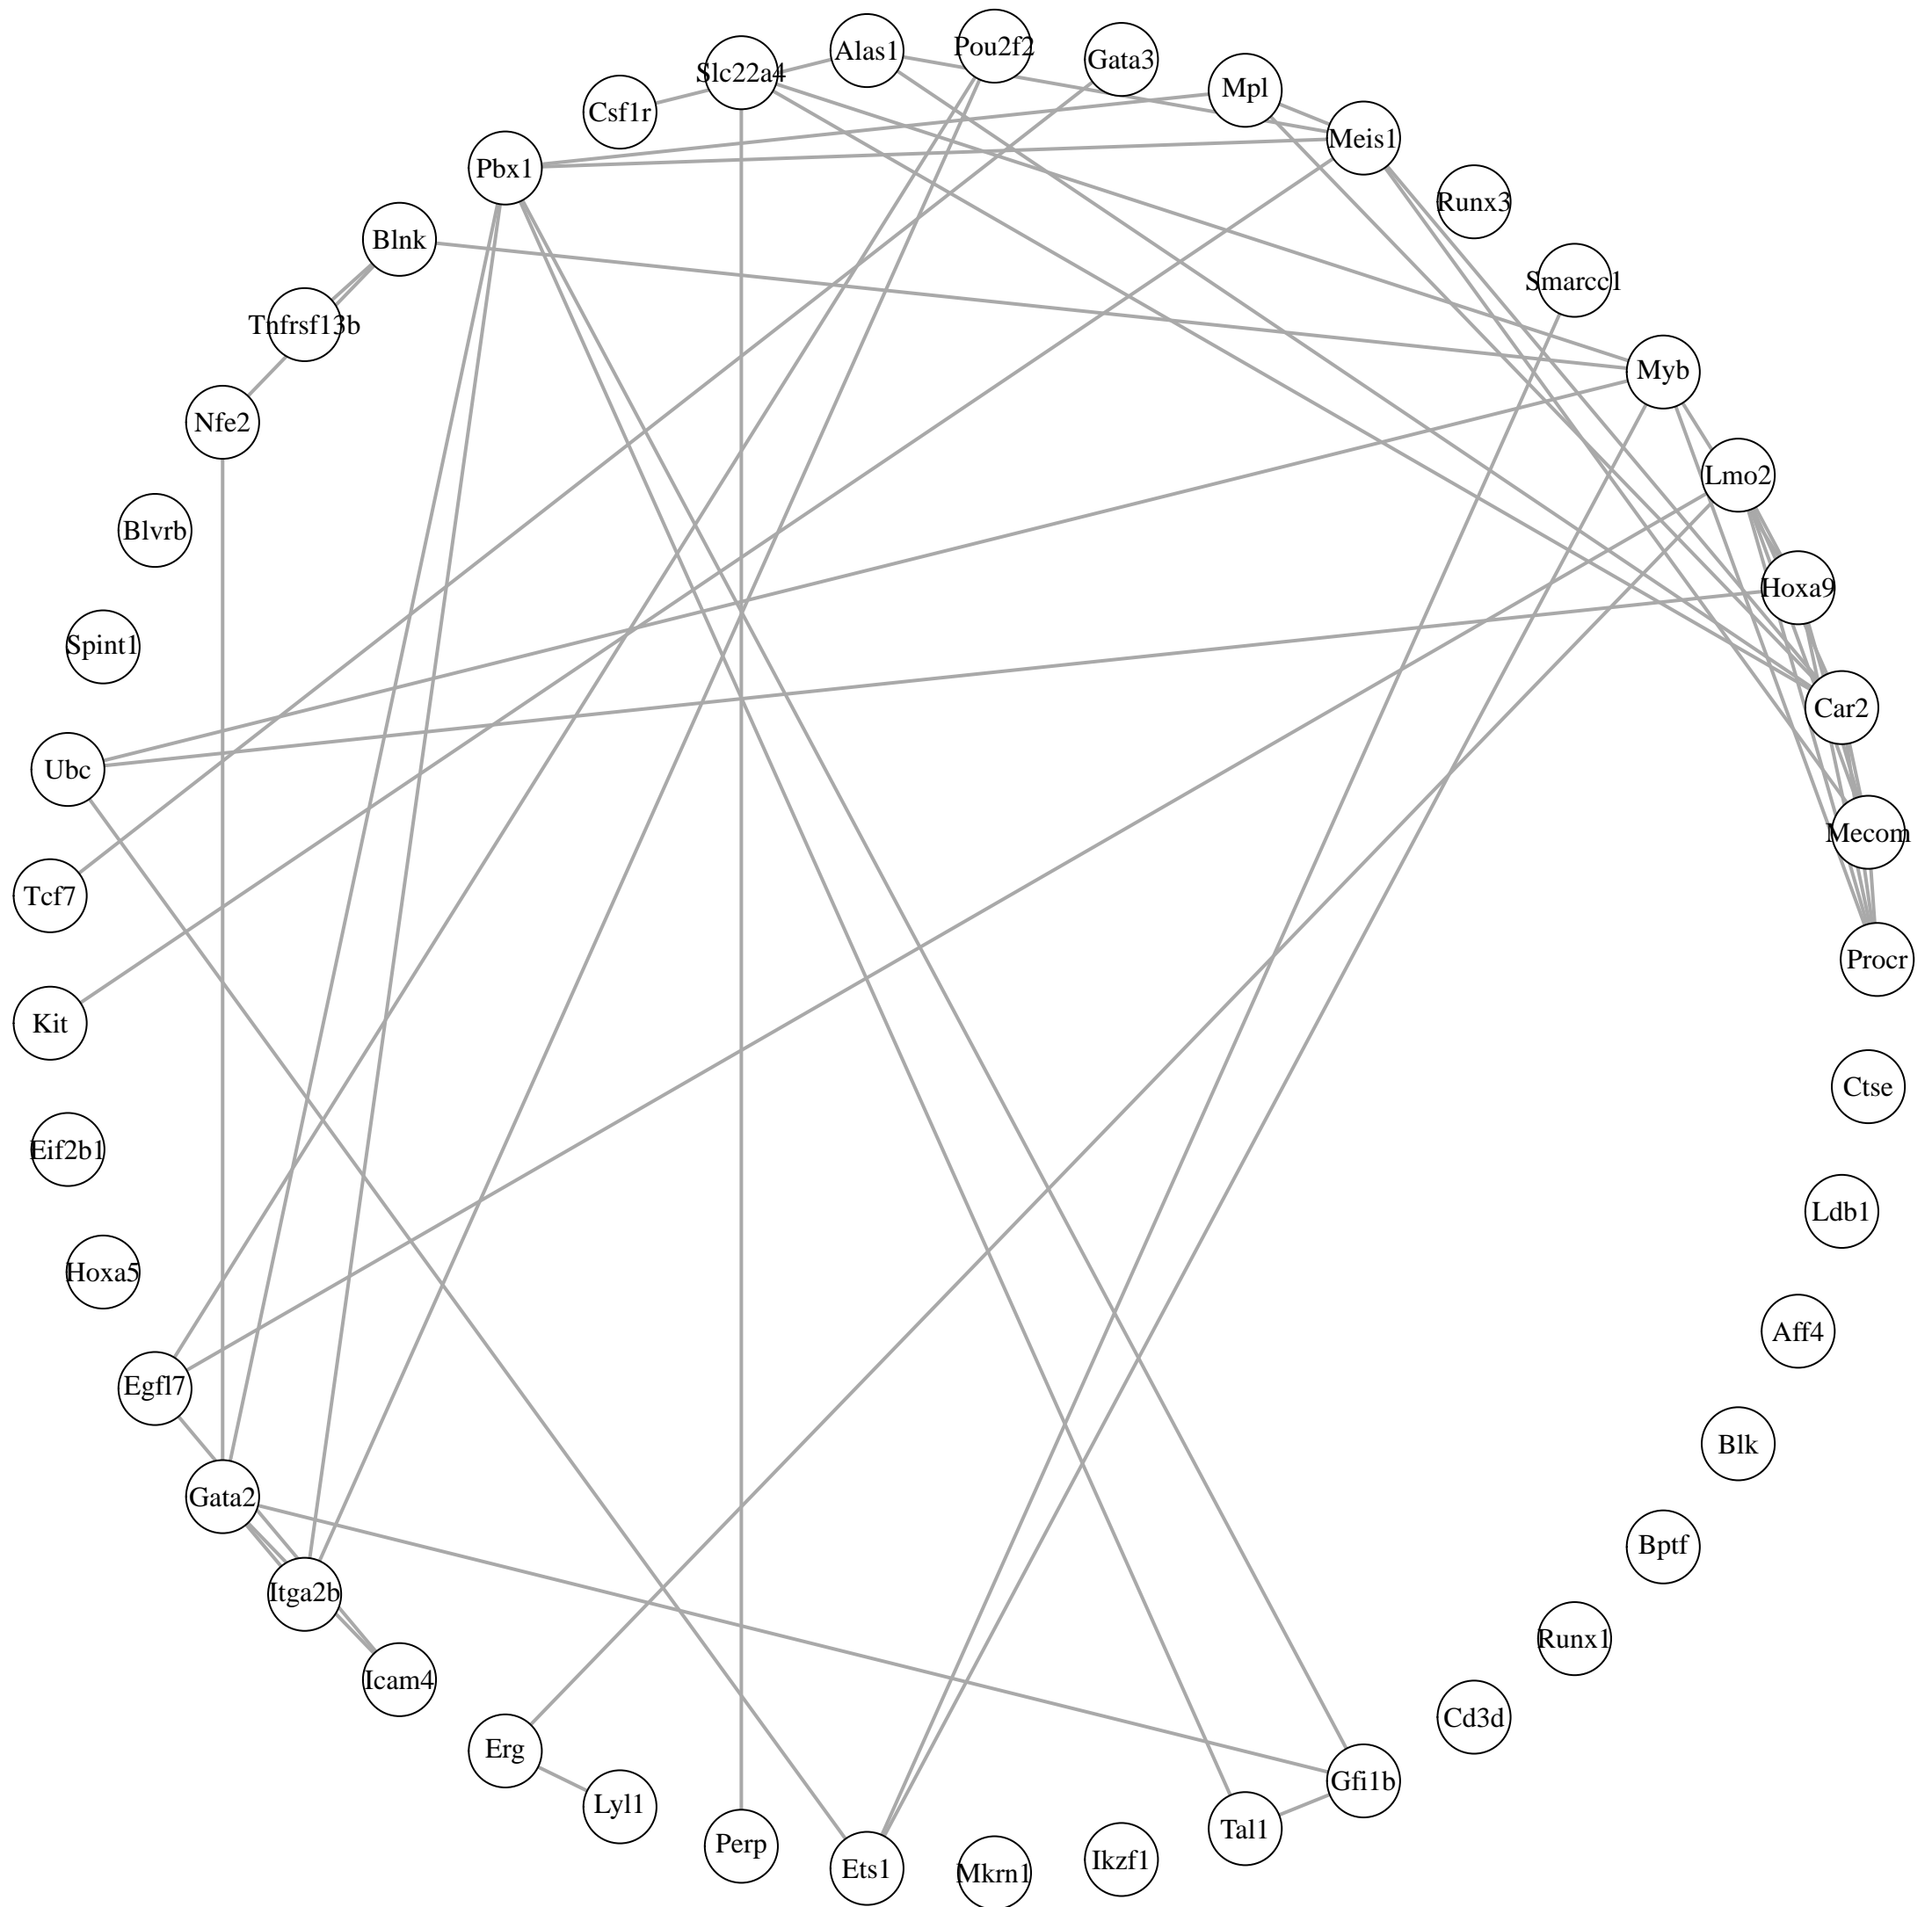



mouse\_HSCtoLMPP\_time 11



mouse\_HSCtoLMPP\_time 12



mouse\_HSCtoLMPP\_time 13



mouse\_HSCtoLMPP\_time 14



mouse\_HSCtoLMPP\_time 15





mouse\_HSCtoLMPP\_time 16



mouse\_HSCtoLMPP\_time 17



mouse\_HSCtoLMPP\_time 18



mouse\_HSCtoLMPP\_time 19

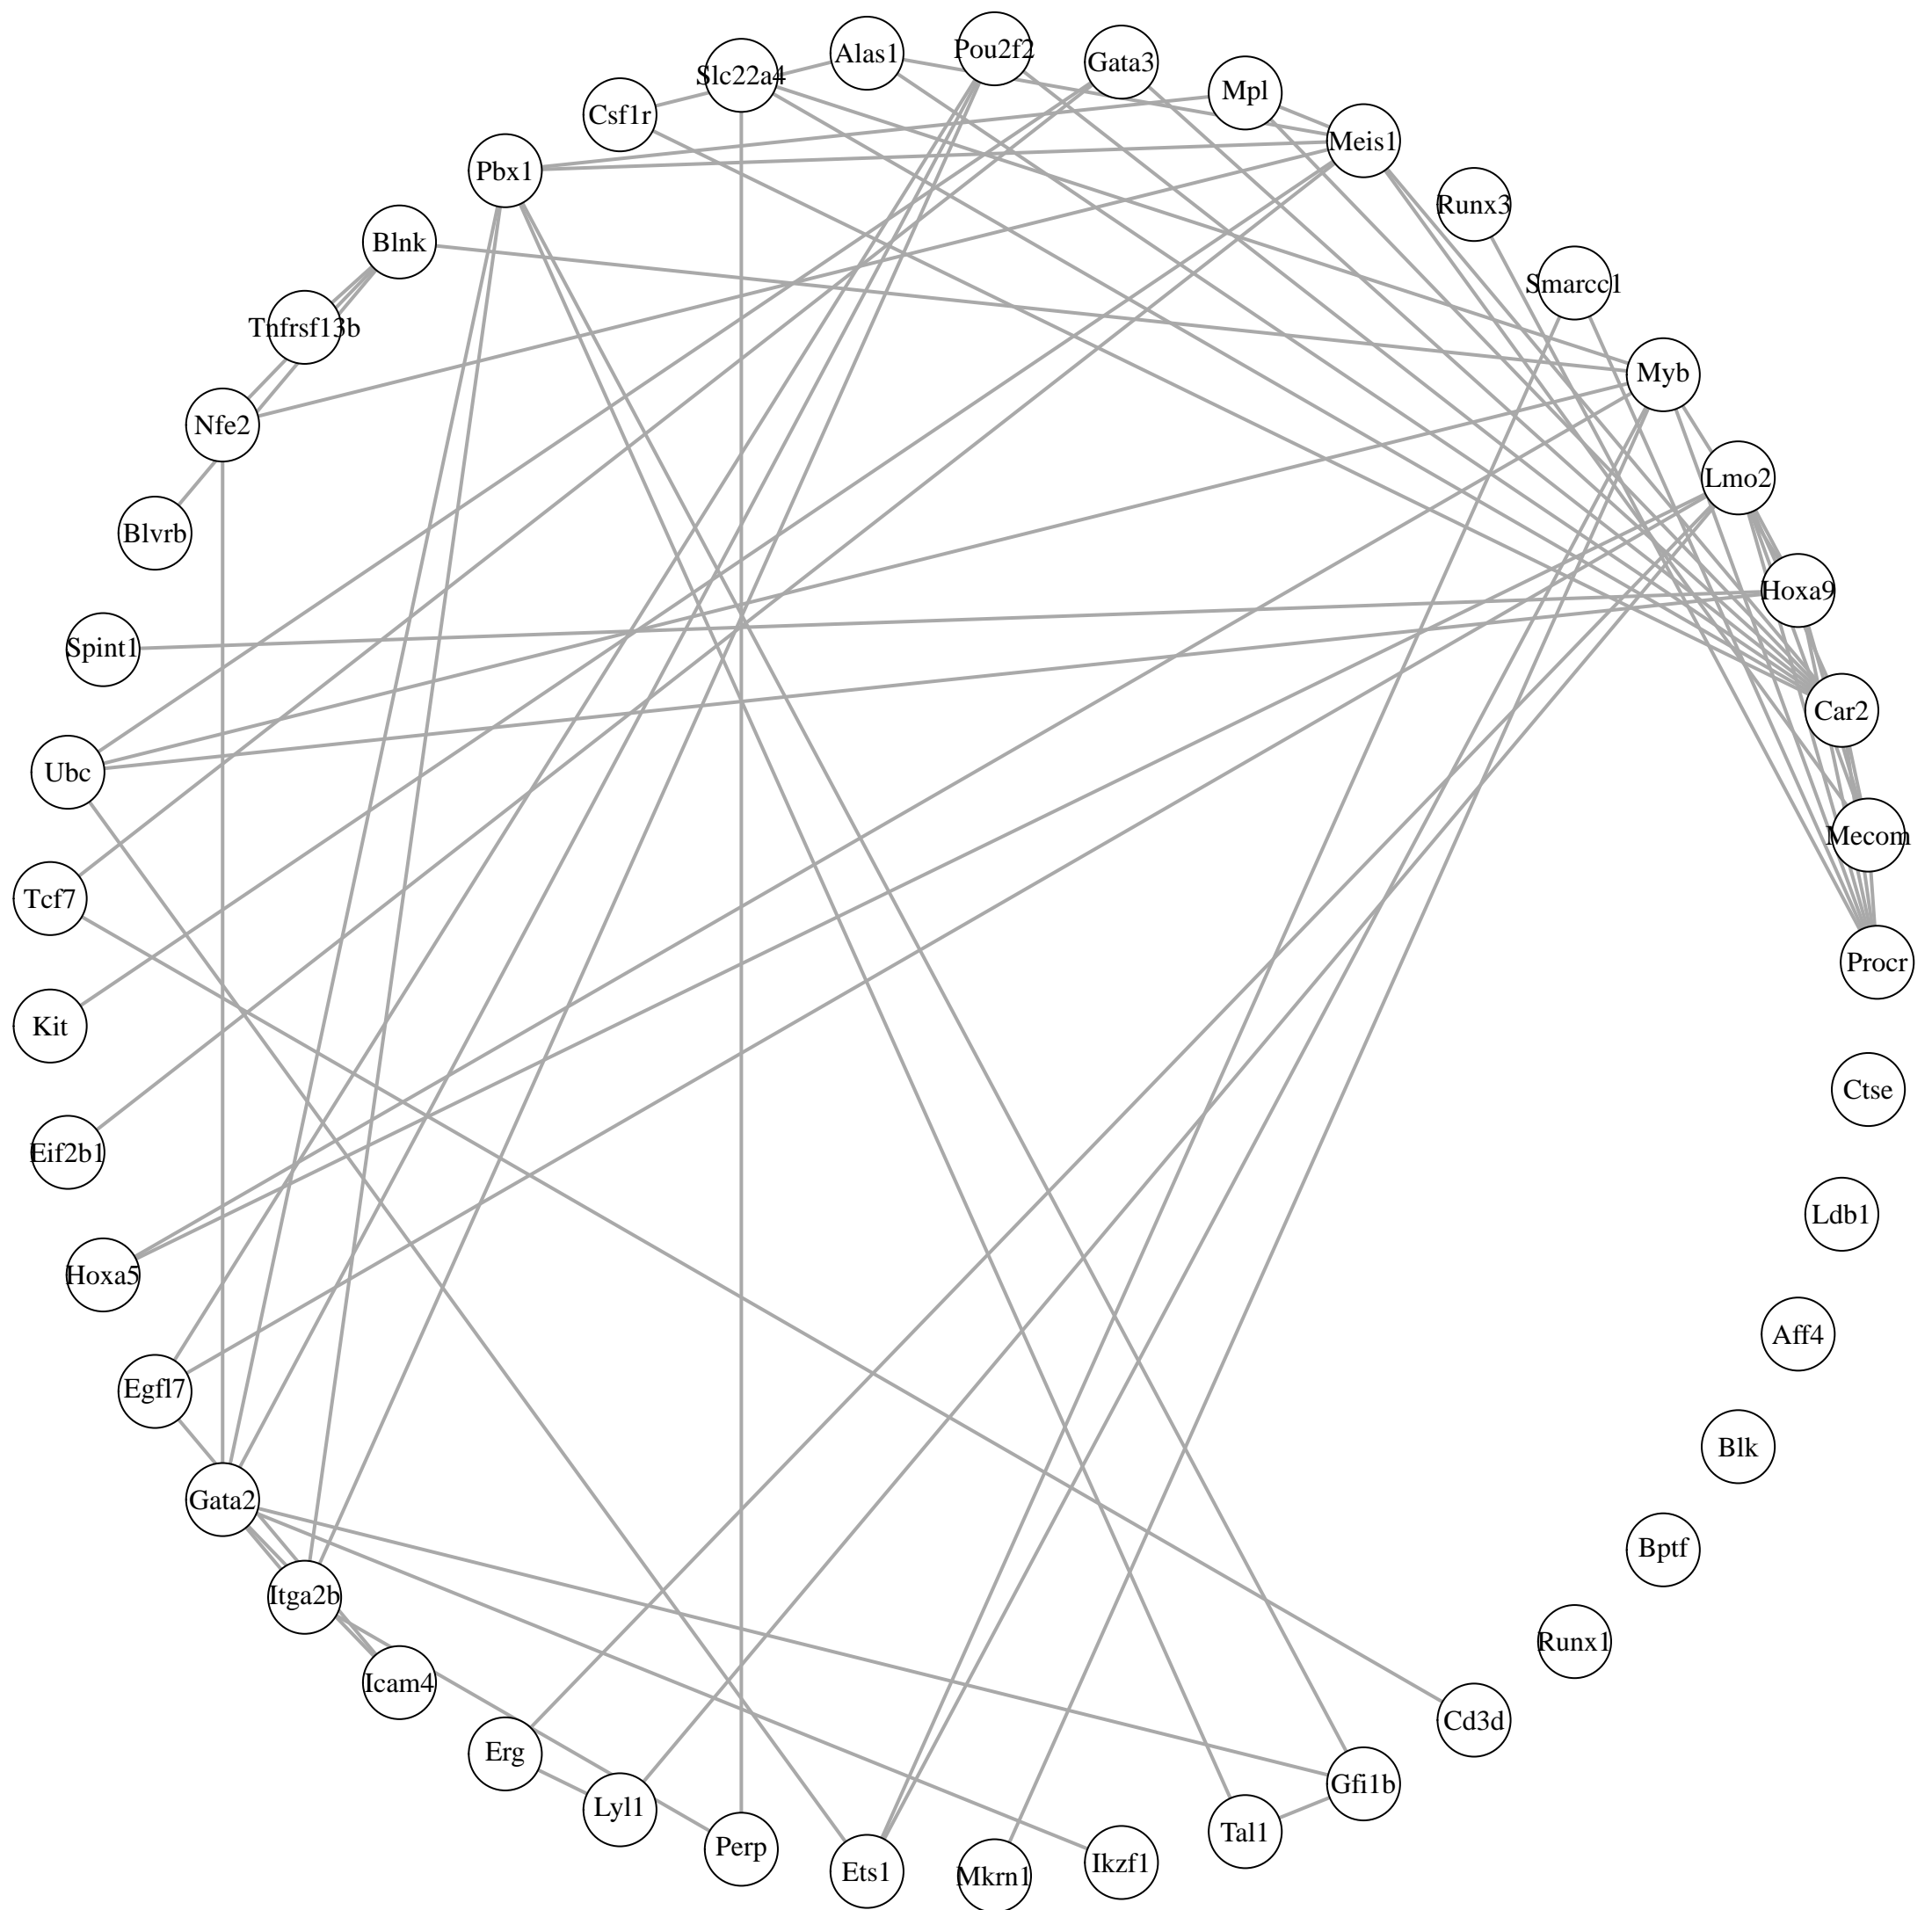

mouse\_HSCtoLMPP\_time 20





mouse\_HSCtoLMPP\_time 21



mouse\_HSCtoLMPP\_time 22



mouse\_HSCtoLMPP\_time 23



mouse\_HSCtoLMPP\_time 24

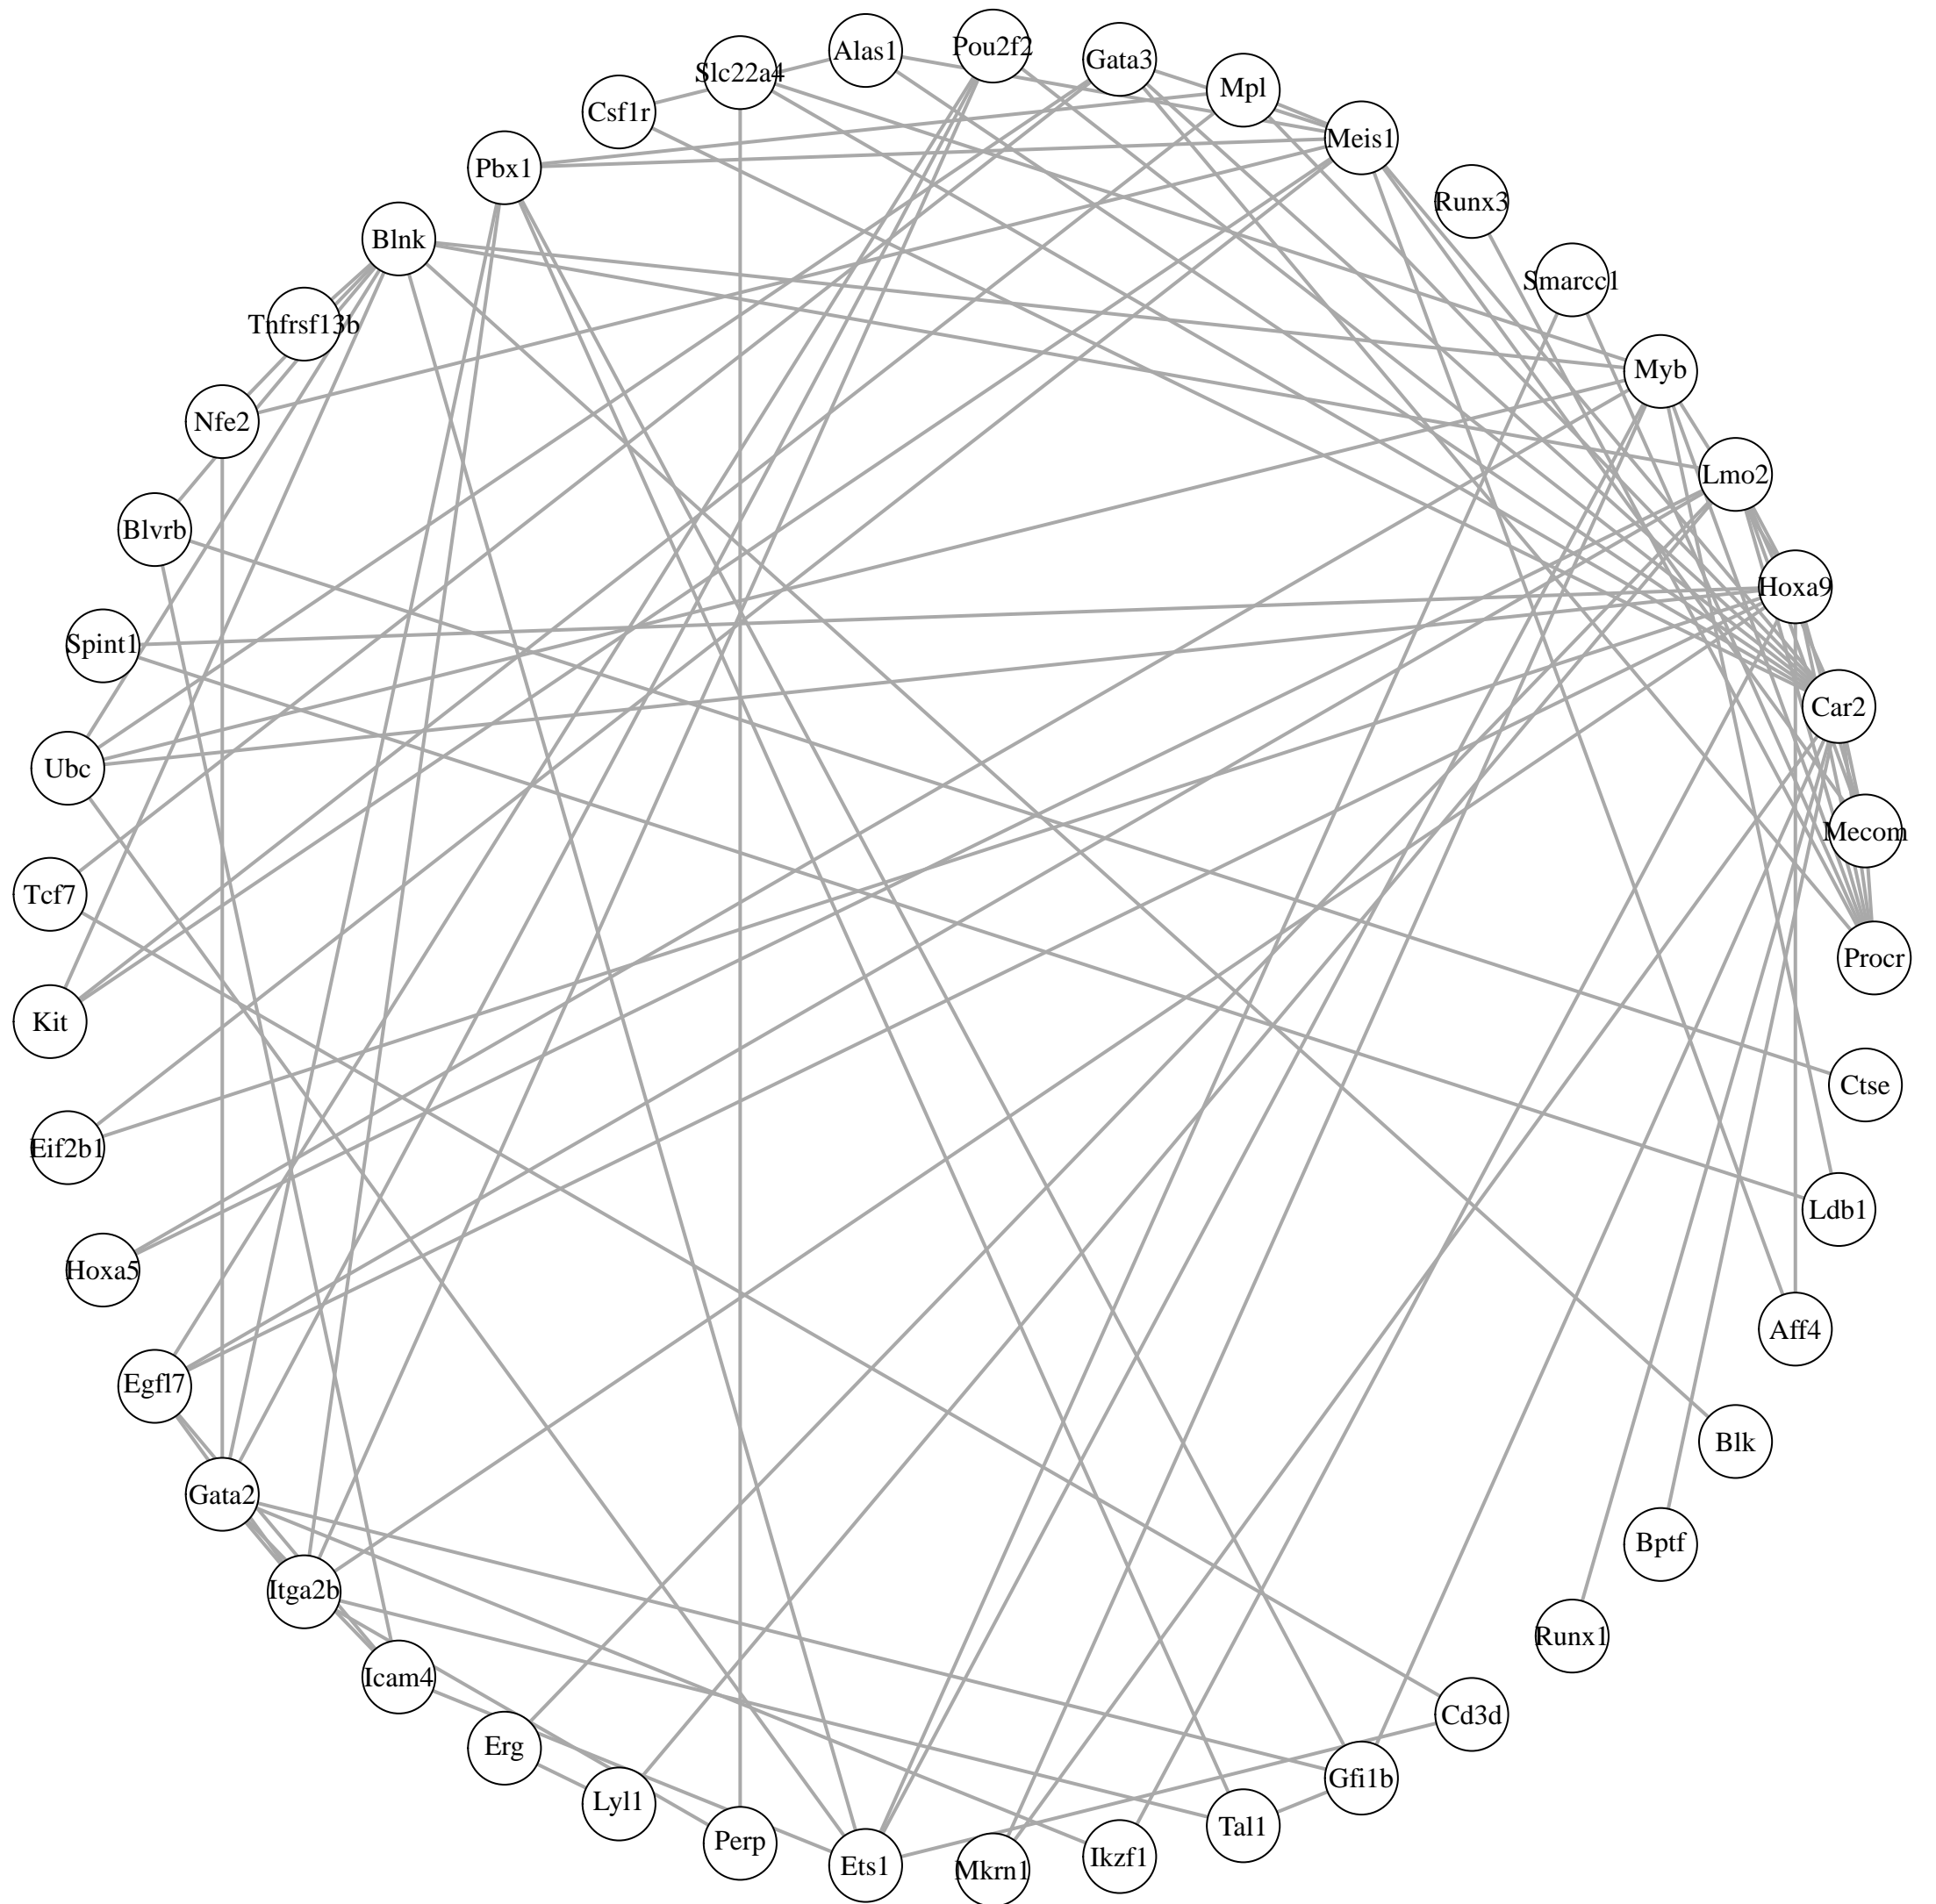

mouse\_HSCtoLMPP\_time 25

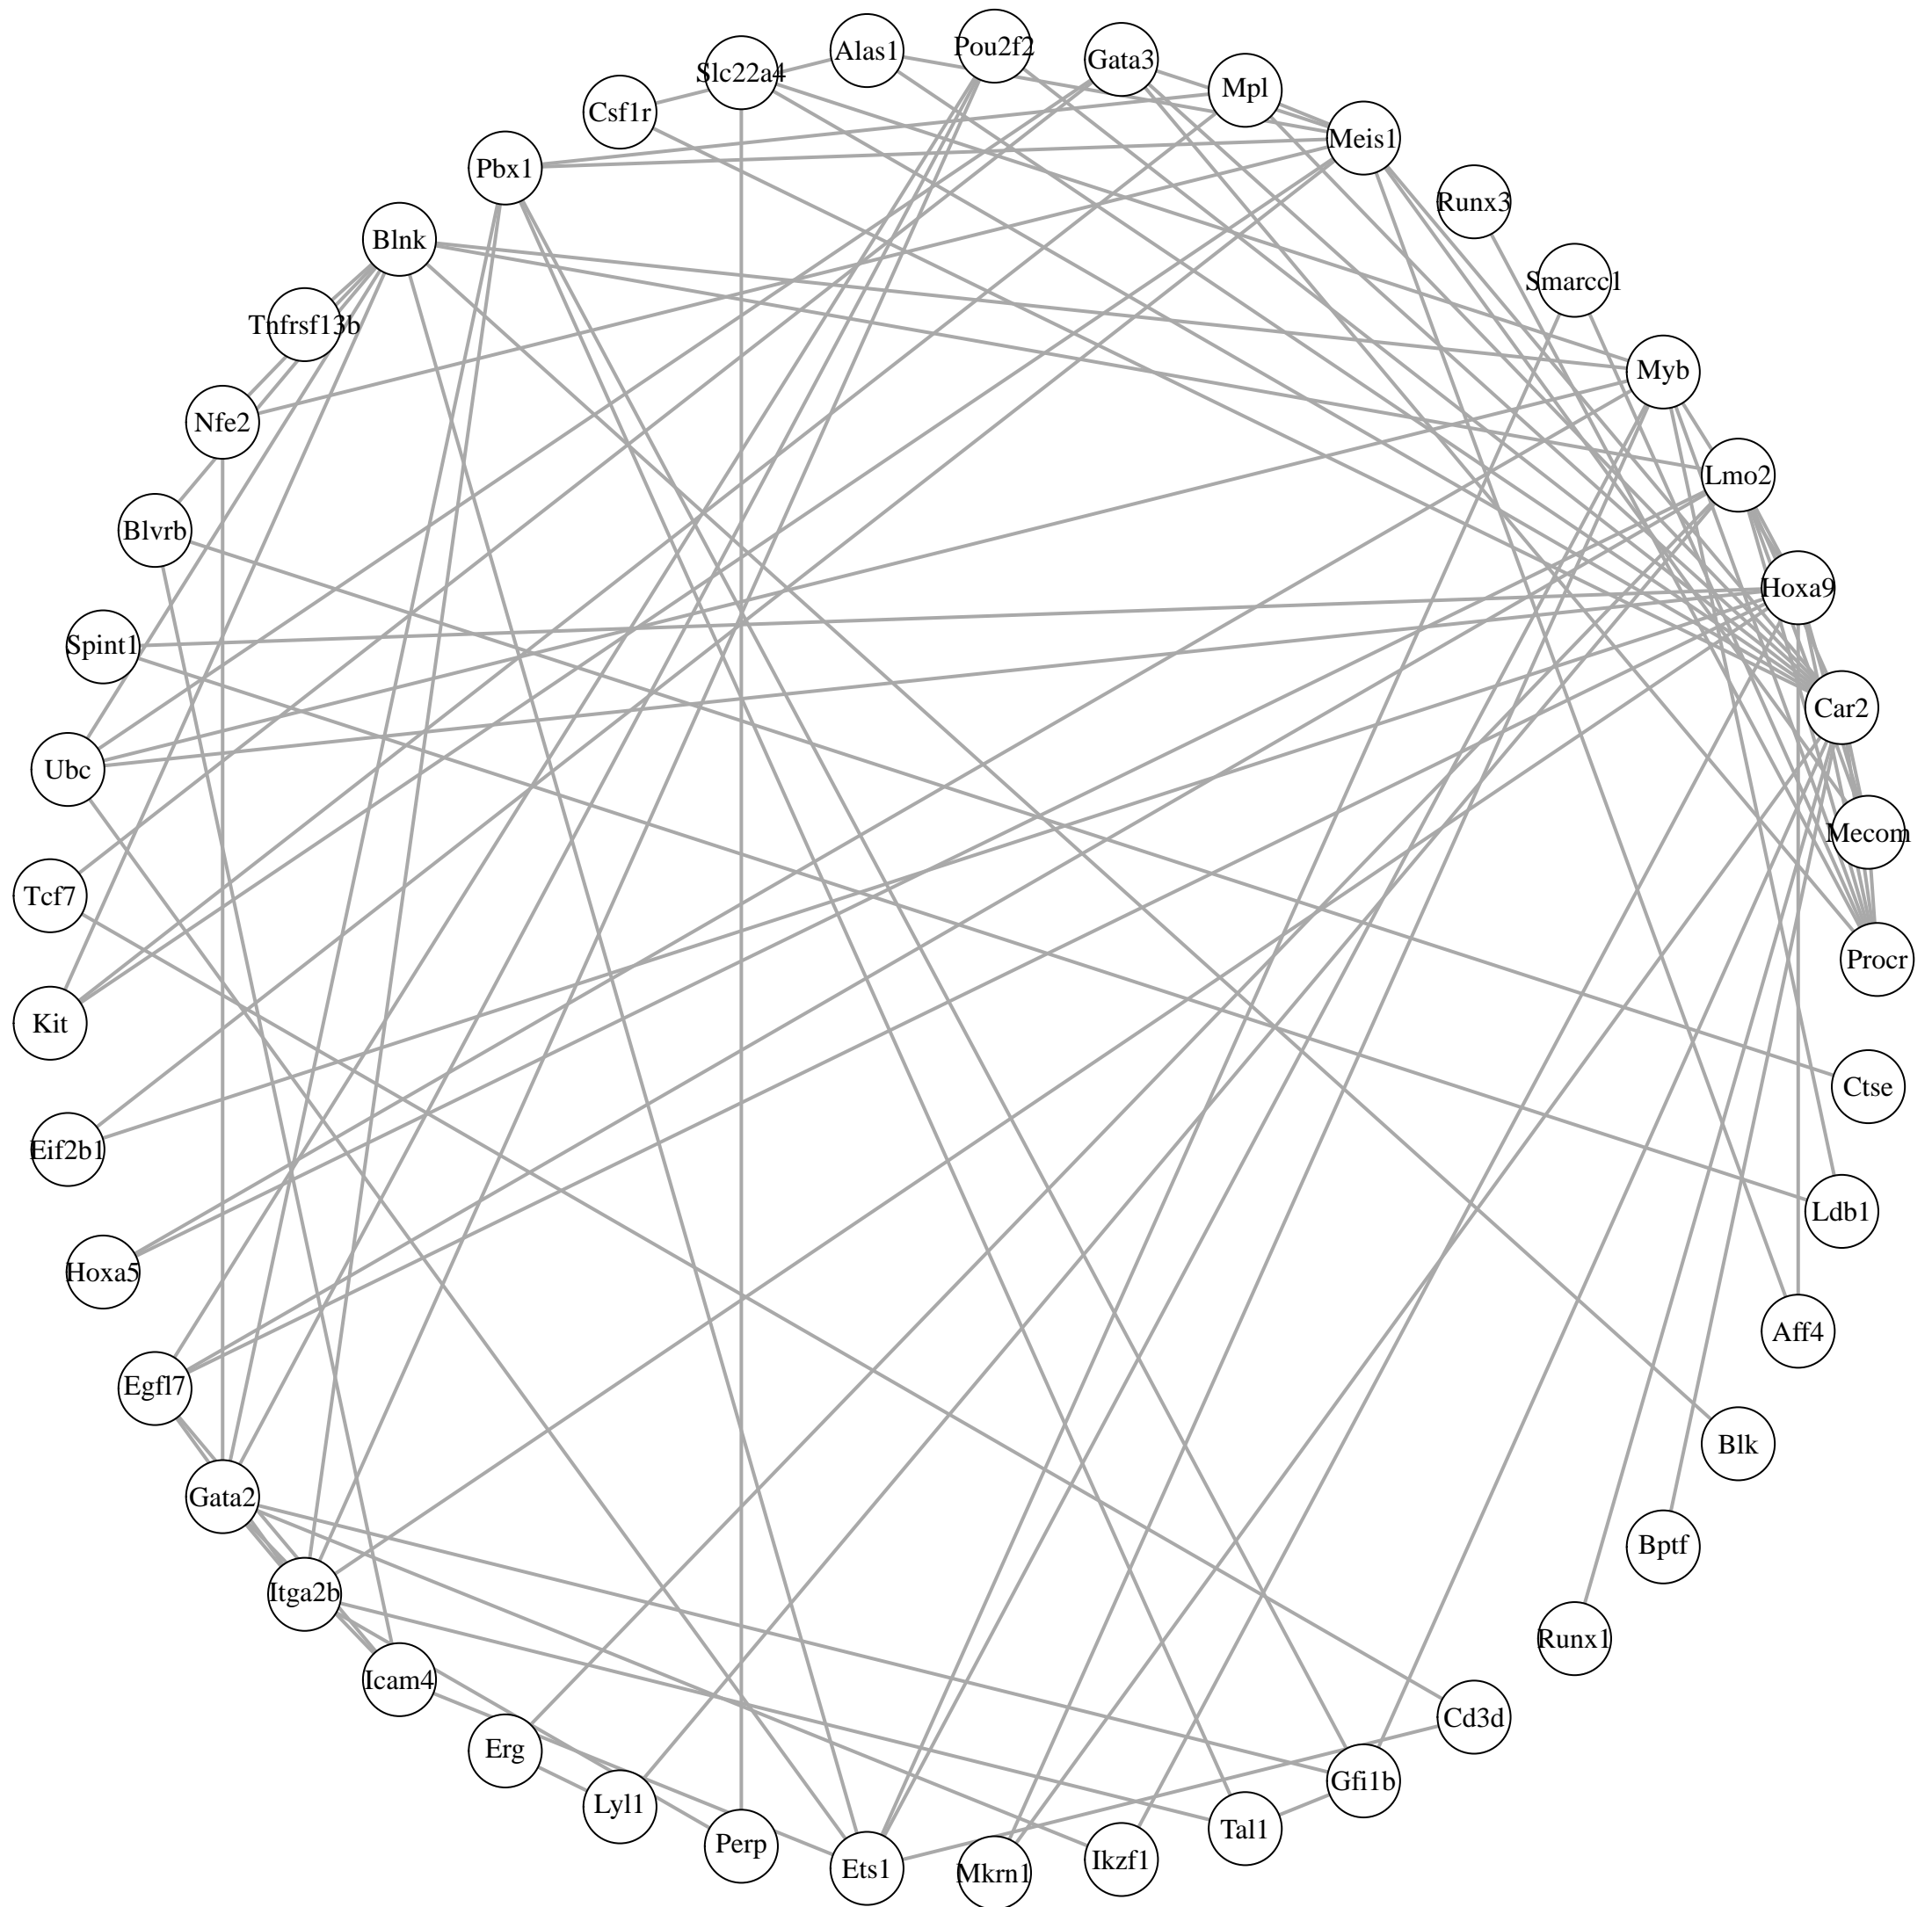



human\_HSCtoMEP\_time 1

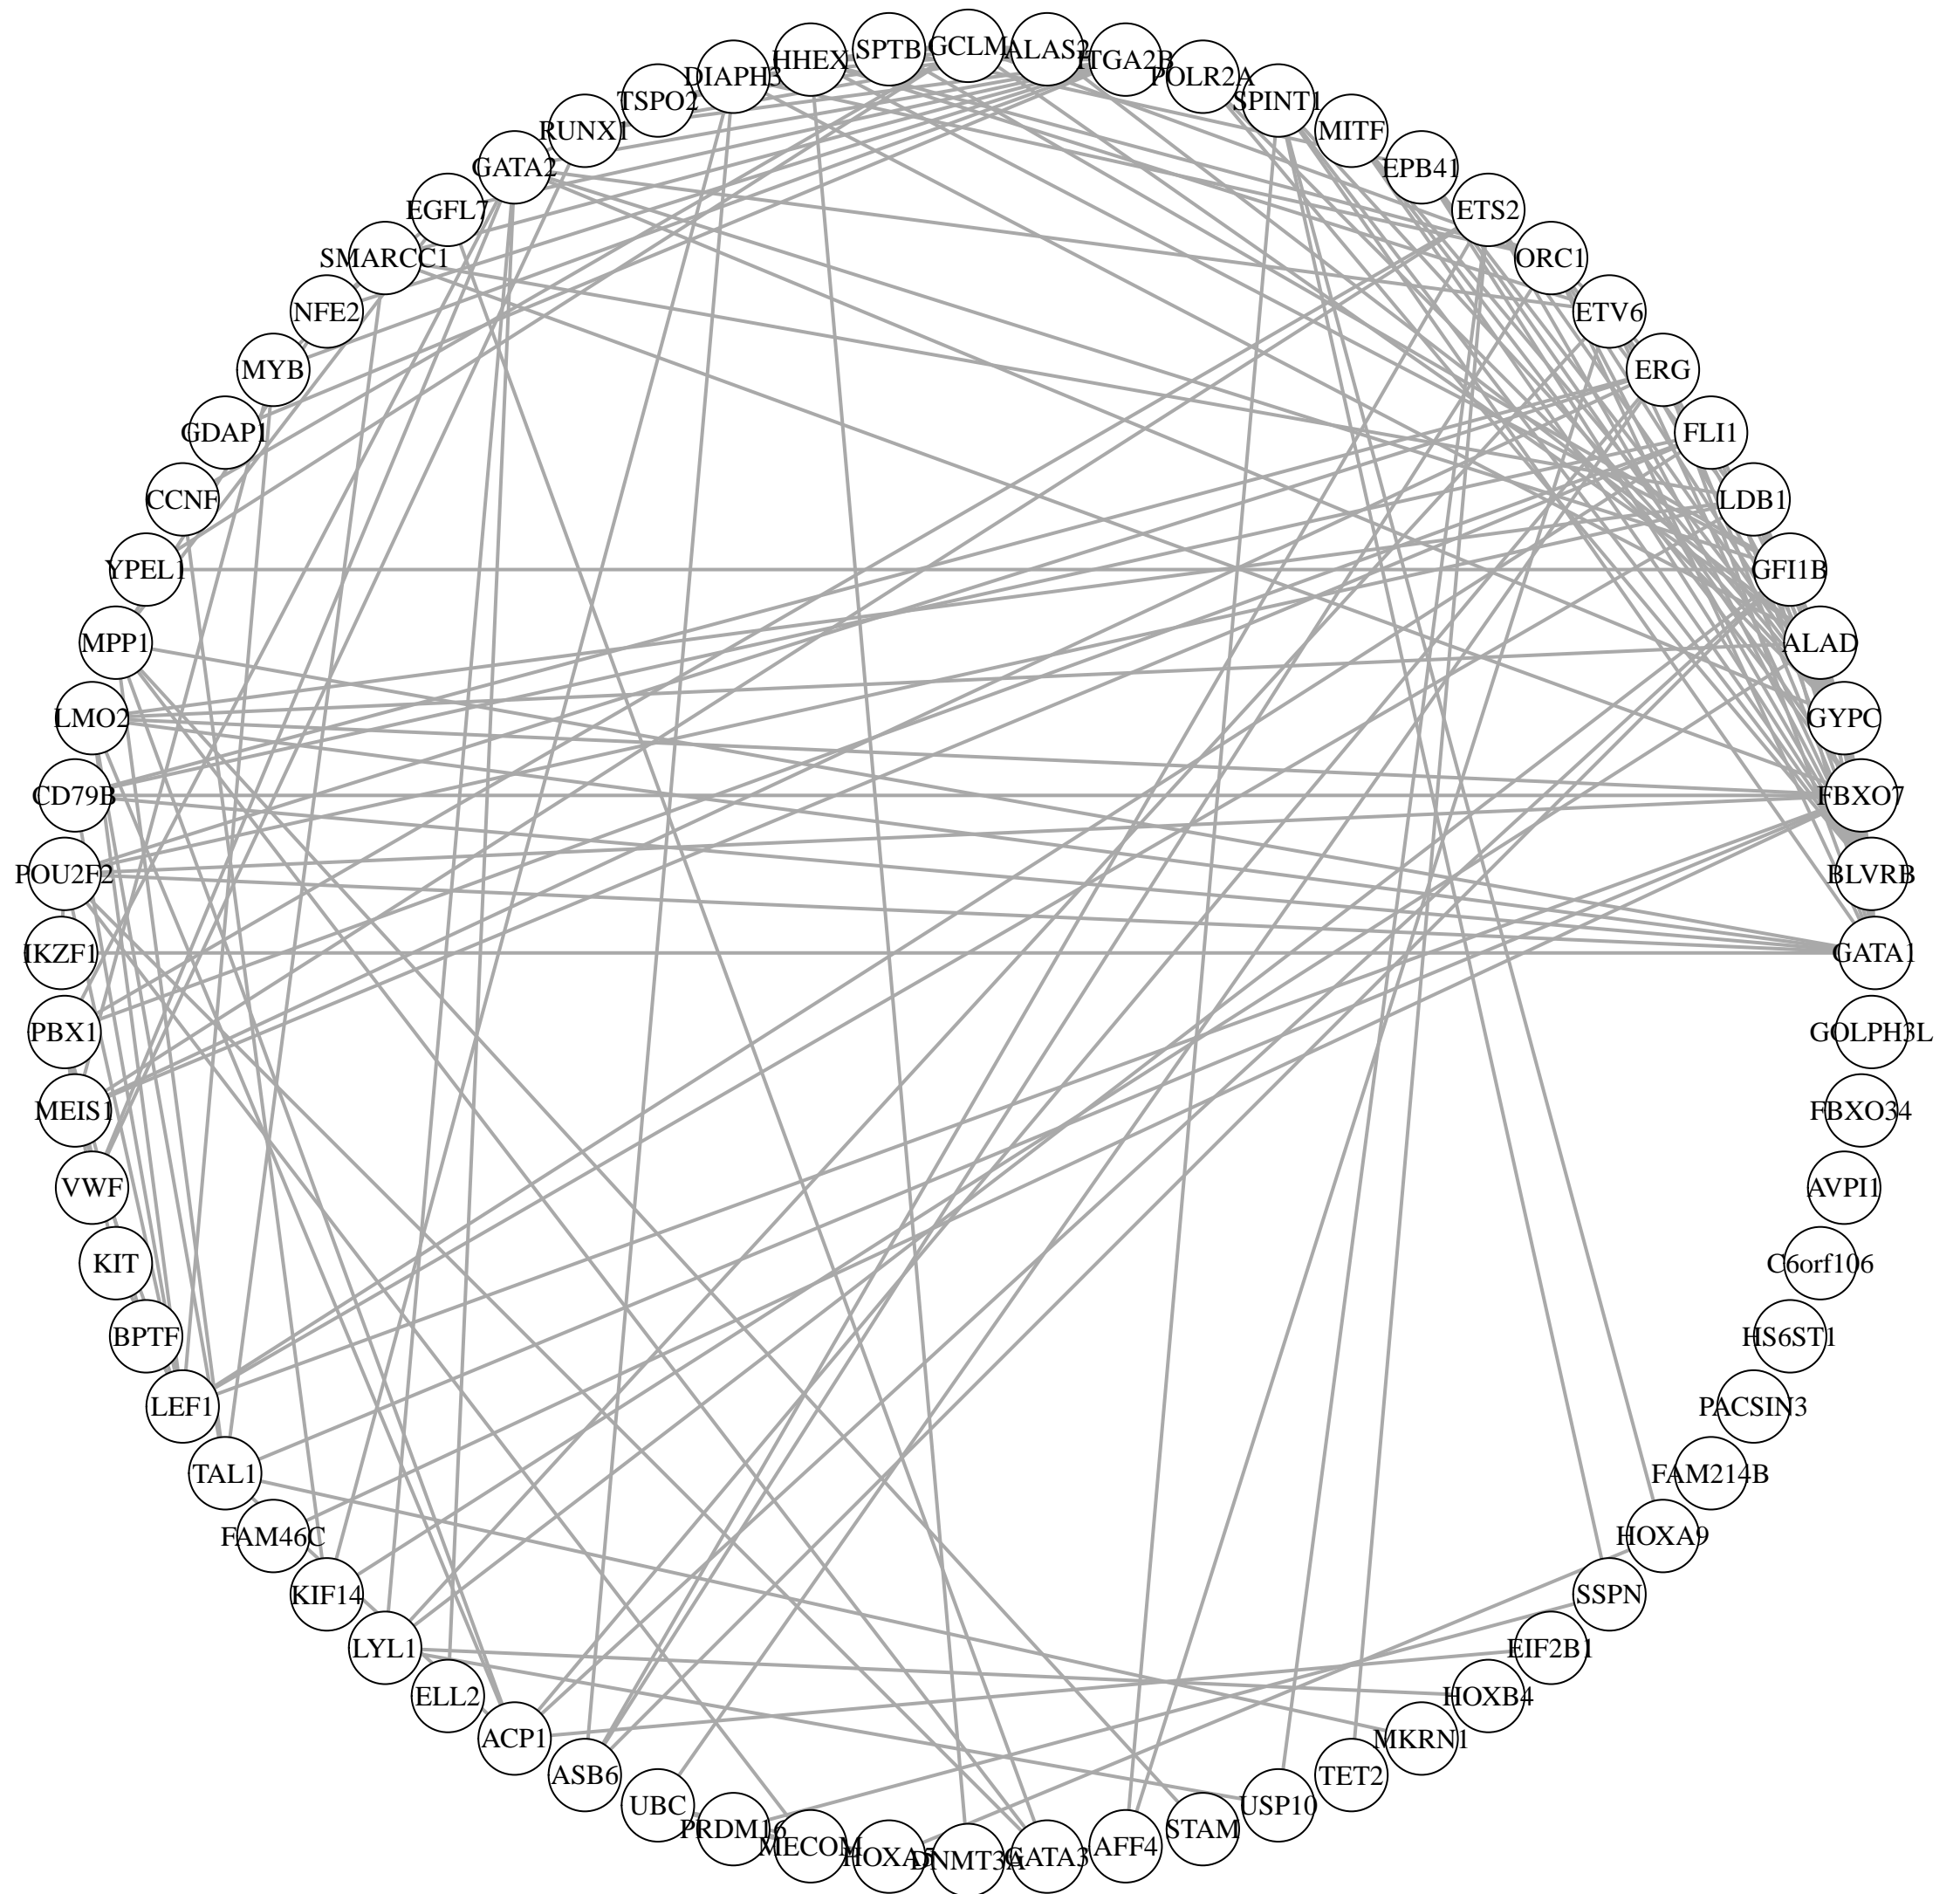

human\_HSCtoMEP\_time 2



human\_HSCtoMEP\_time 3



human\_HSCtoMEP\_time 4



human\_HSCtoMEP\_time 5





human\_HSCtoMEP\_time 6



human\_HSCtoMEP\_time 7



human\_HSCtoMEP\_time 8



human\_HSCtoMEP\_time 9



human\_HSCtoMEP\_time 10





human\_HSCtoMEP\_time 11

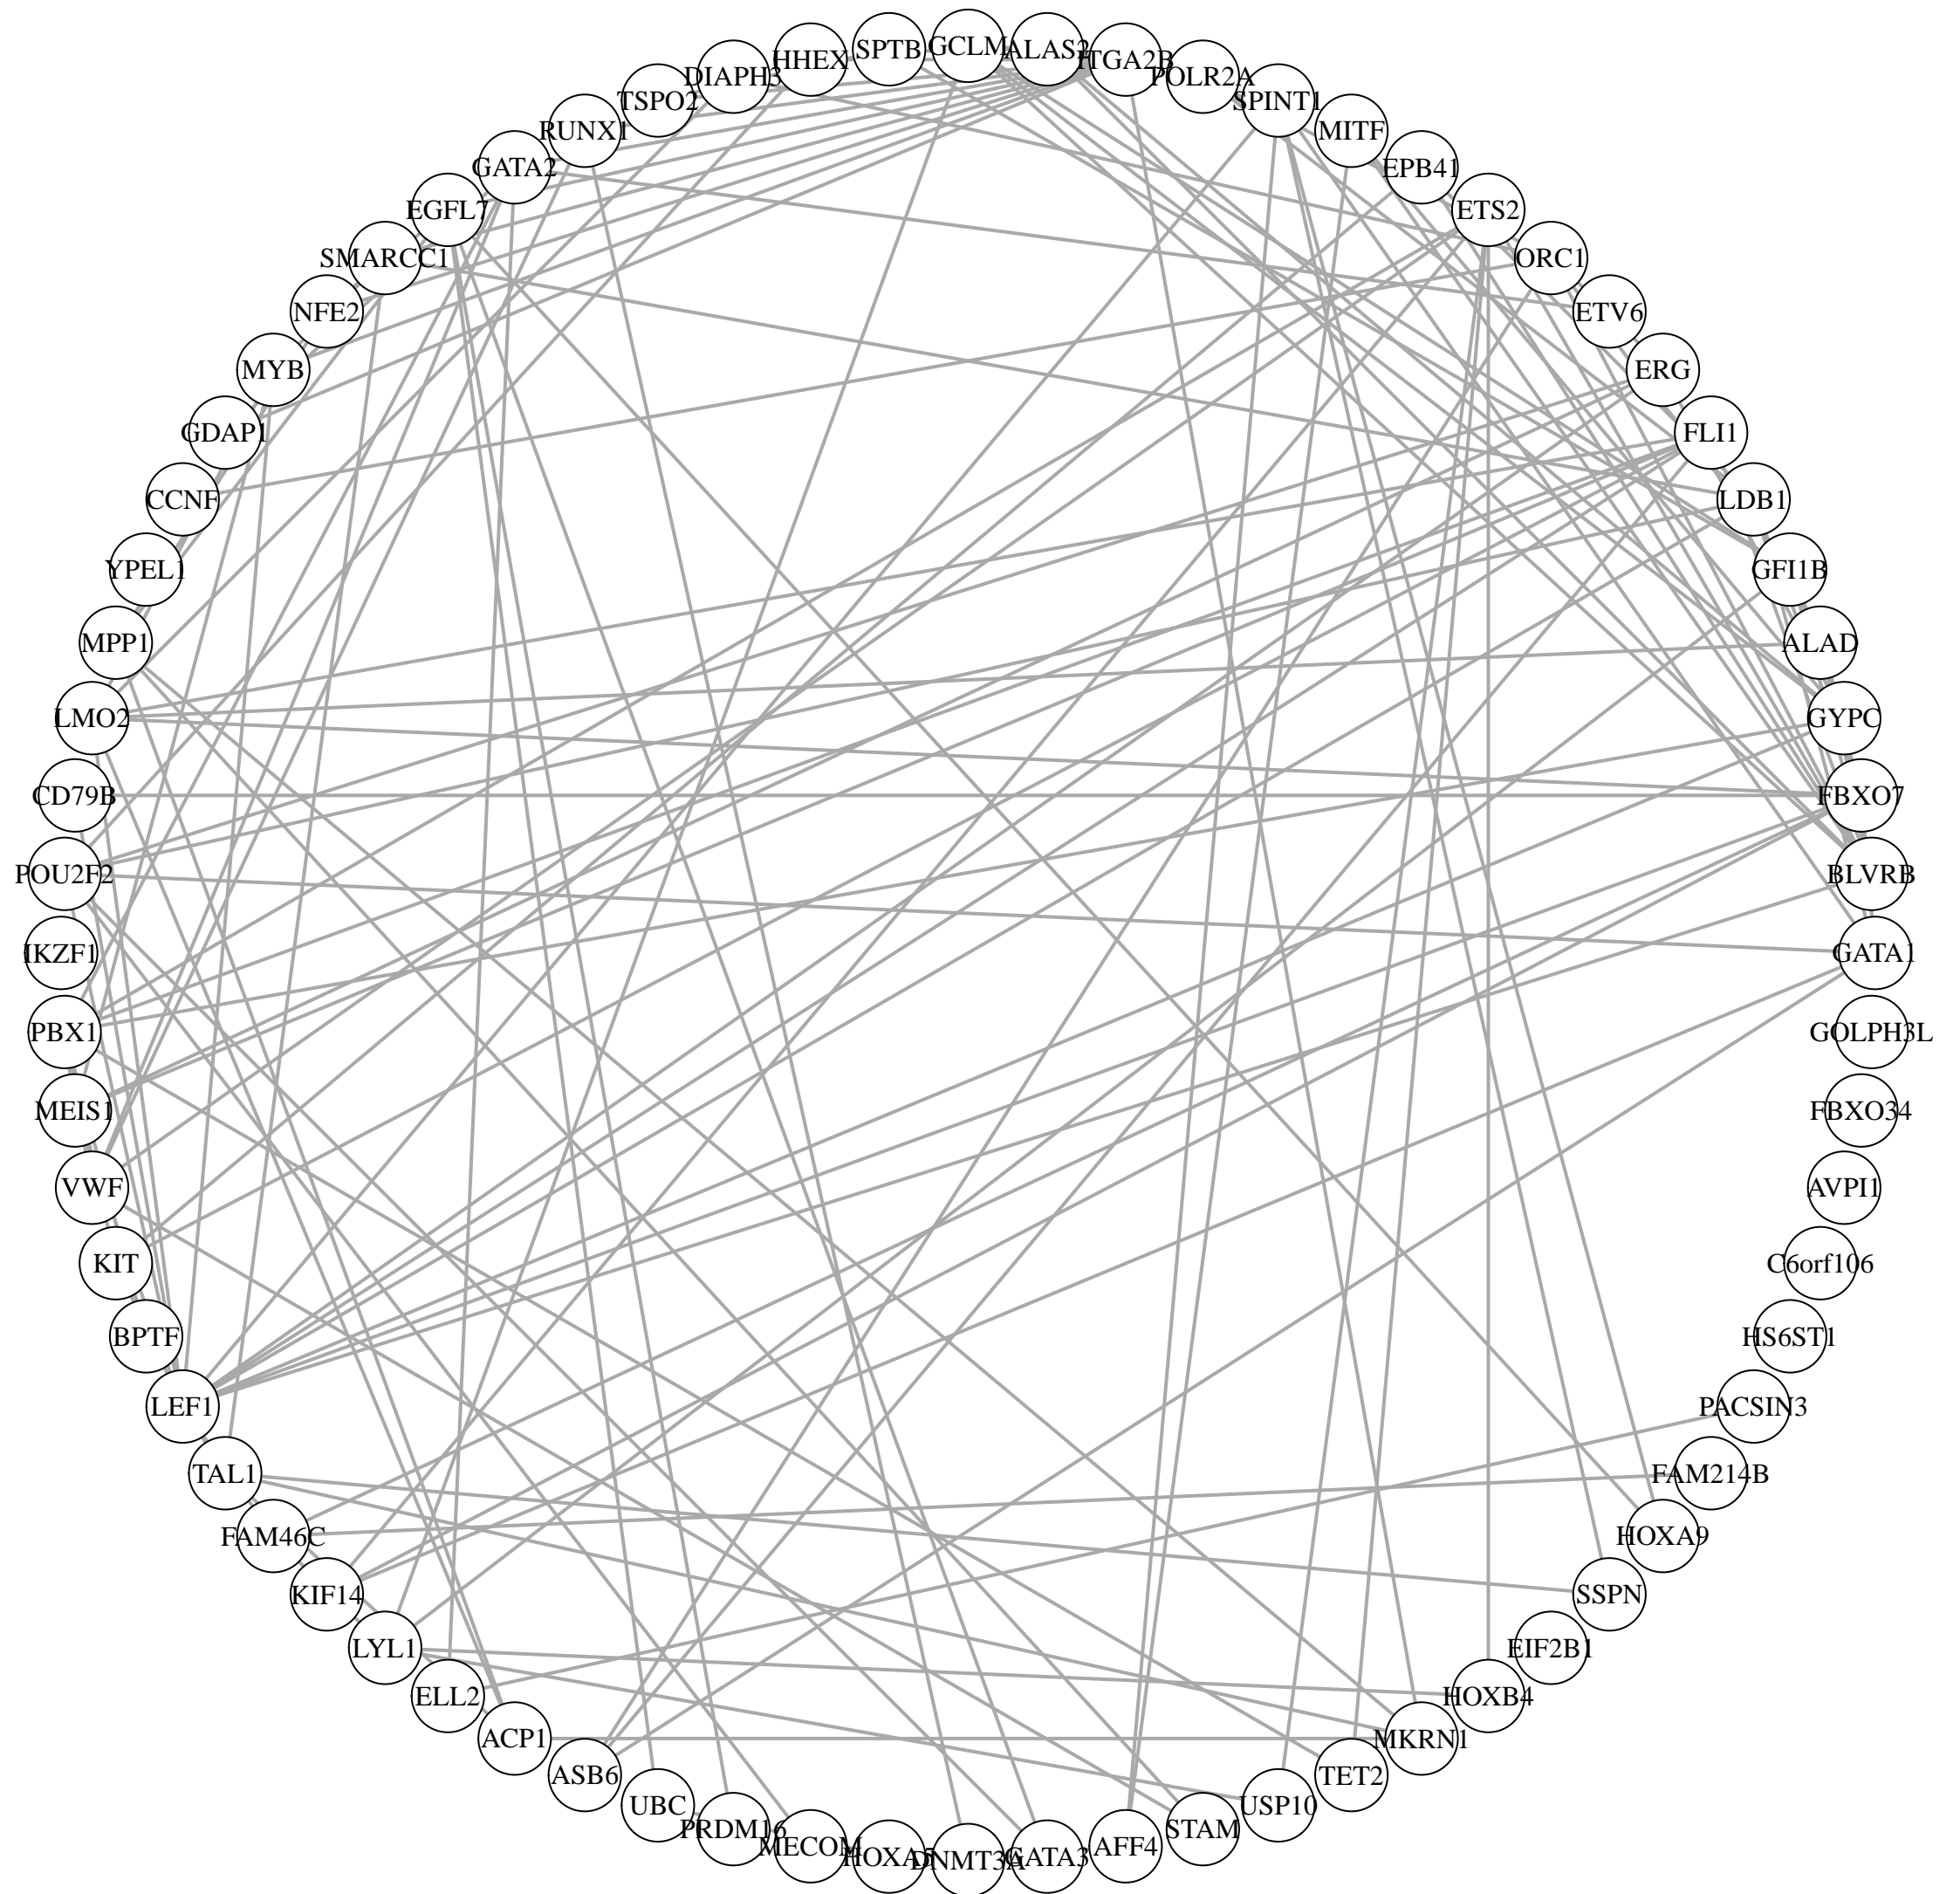

human\_HSCtoMEP\_time 12

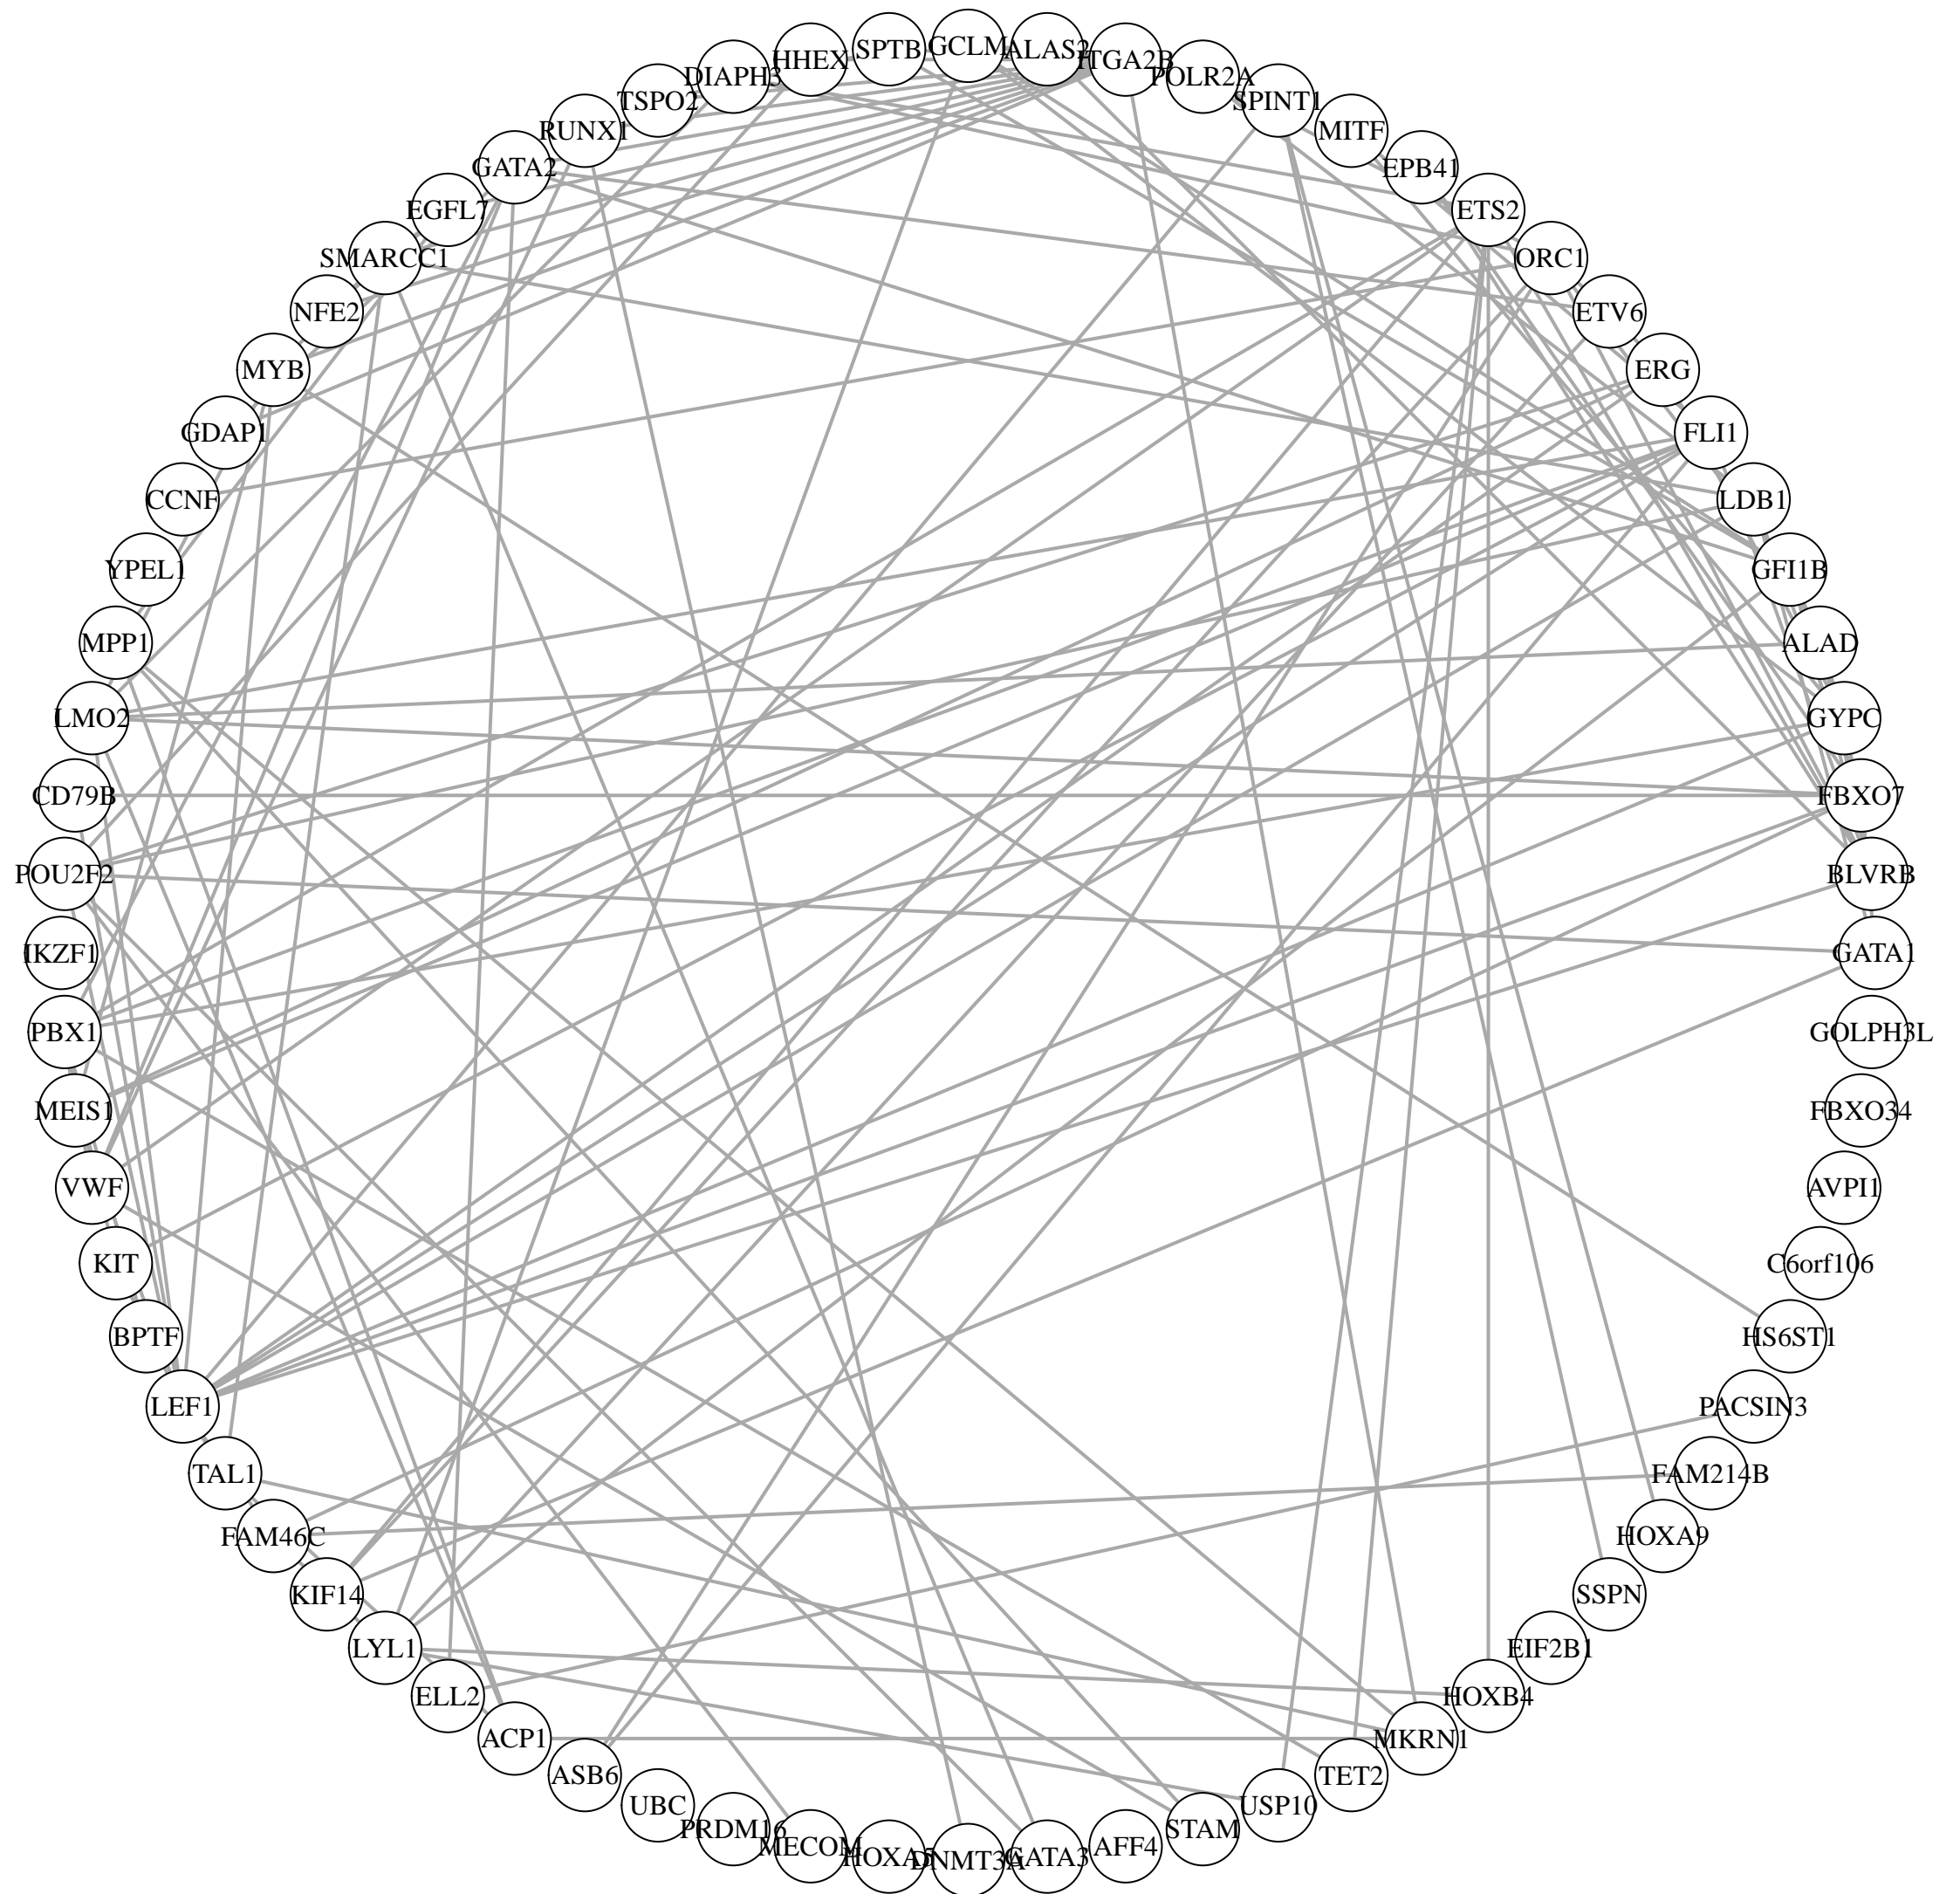

**human\_HSCtoMEP\_time 13**

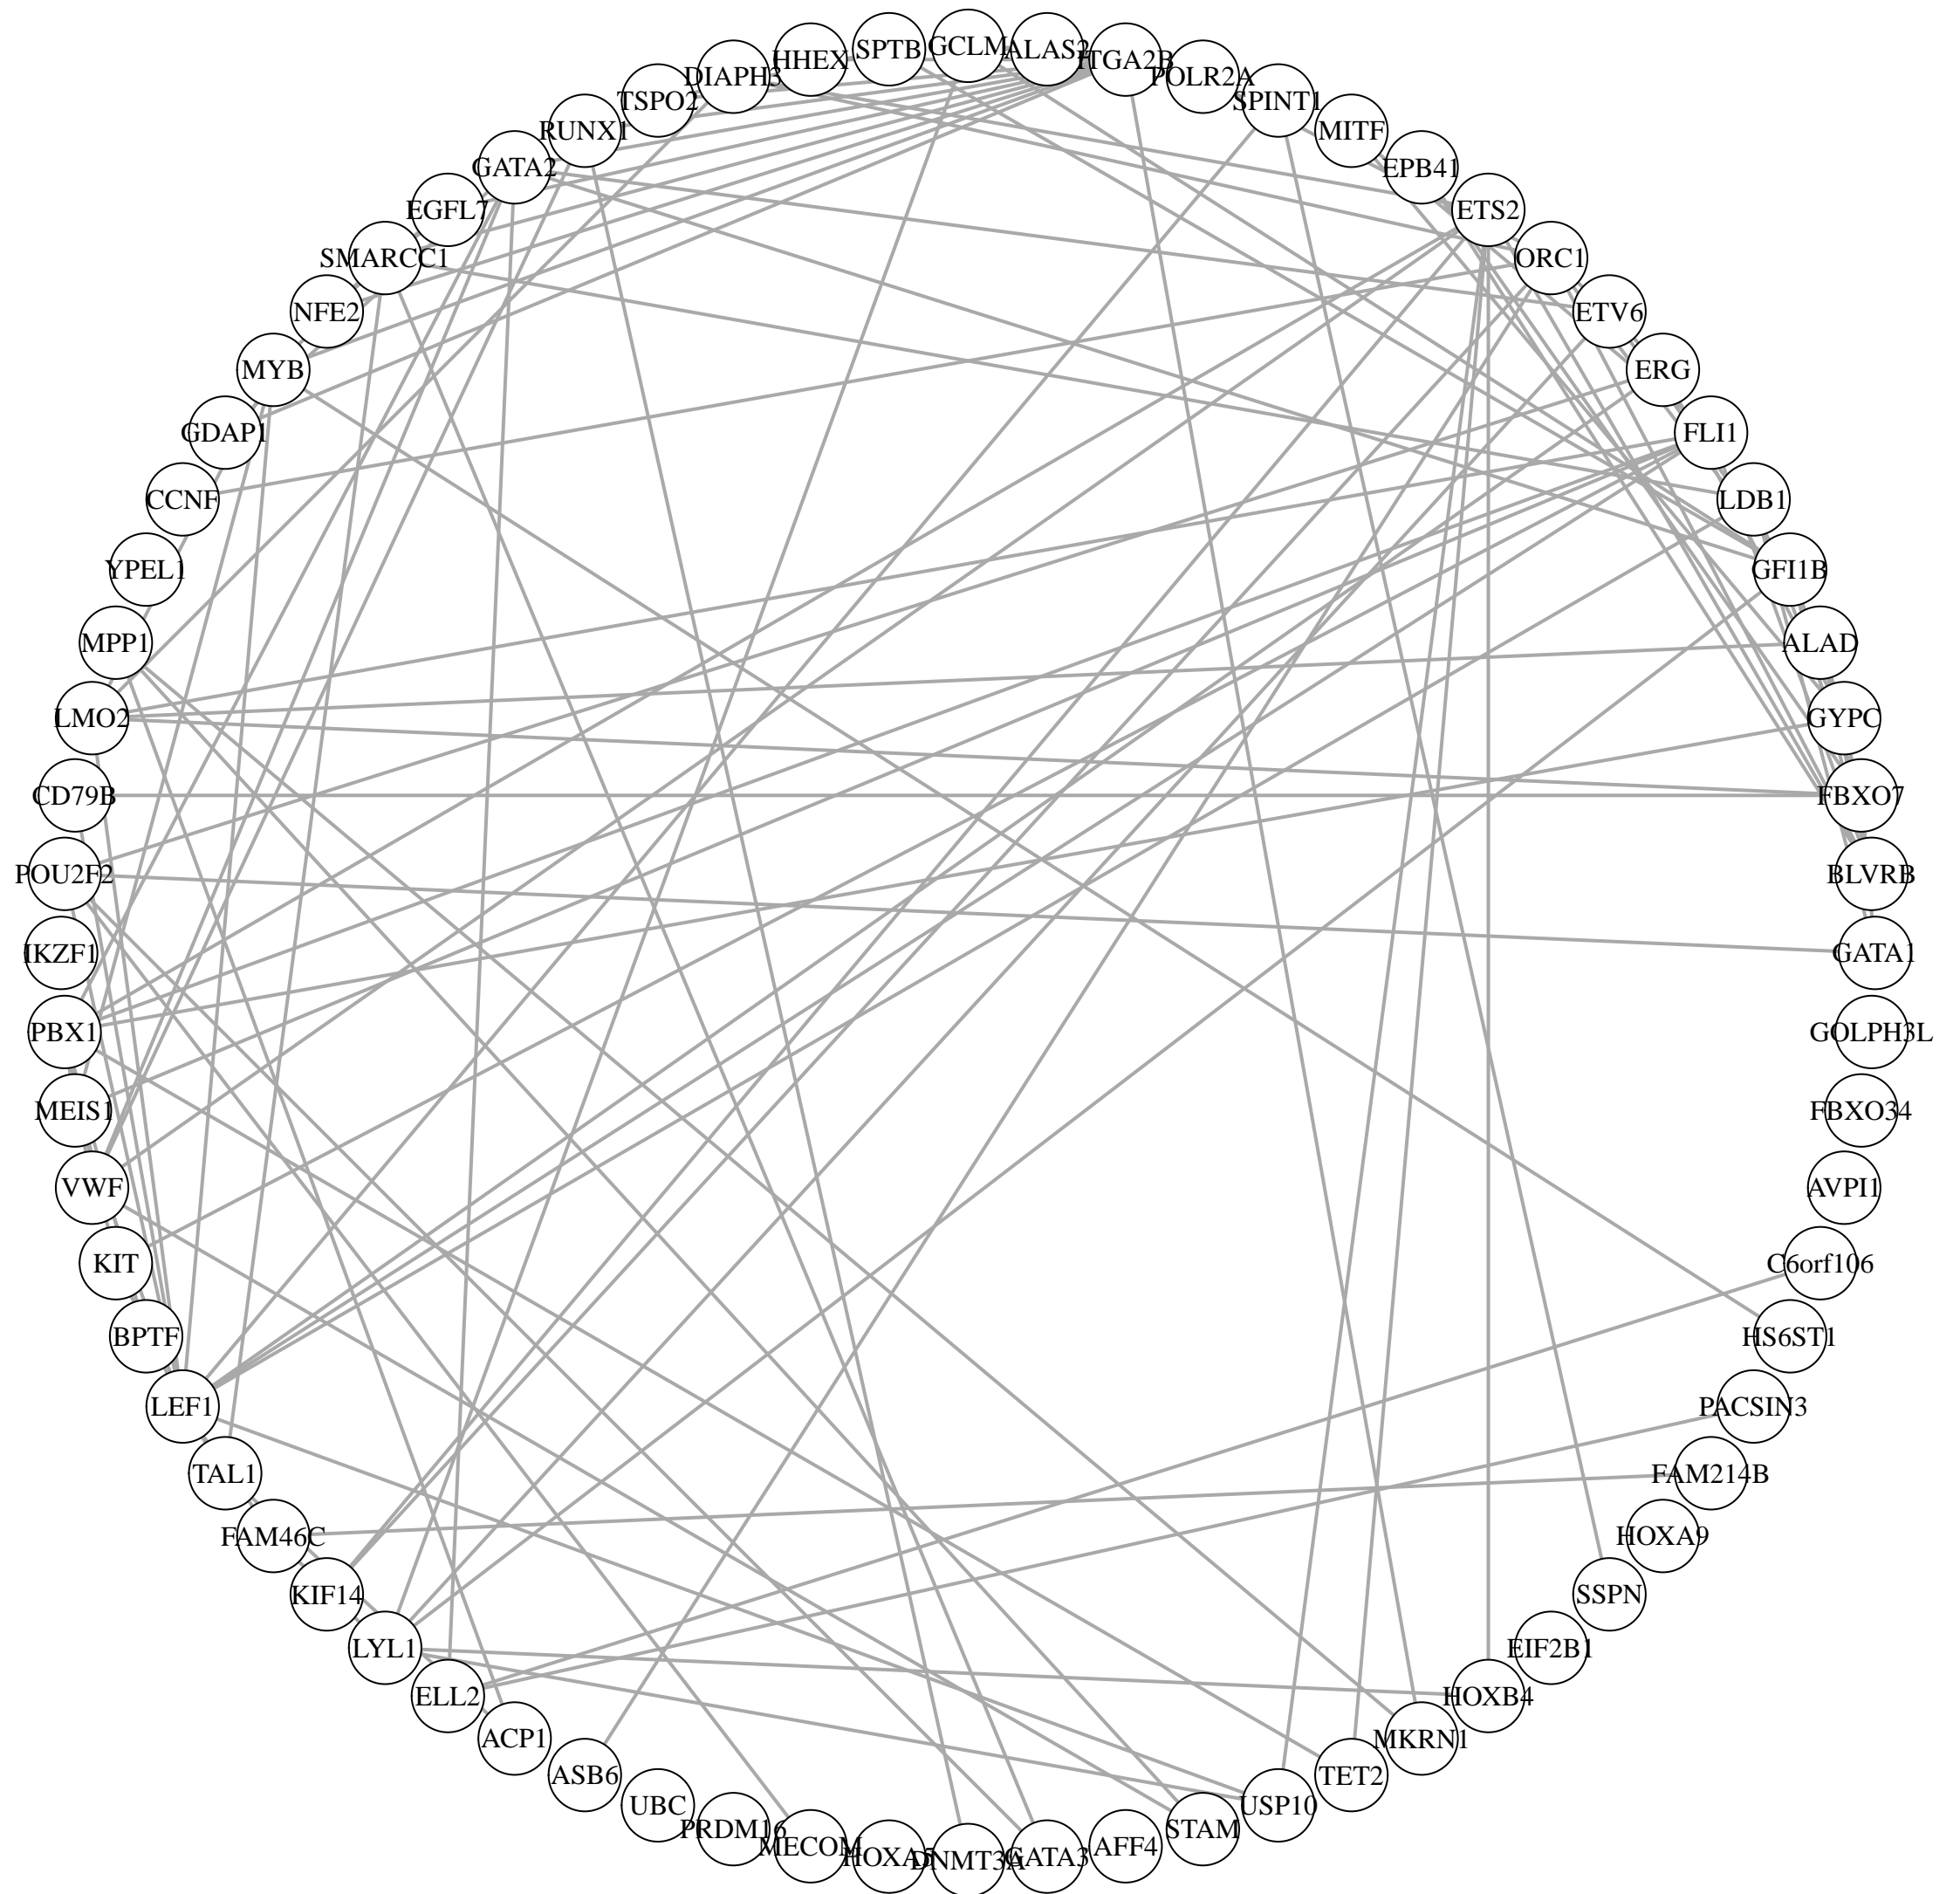

human\_HSCtoMEP\_time 14

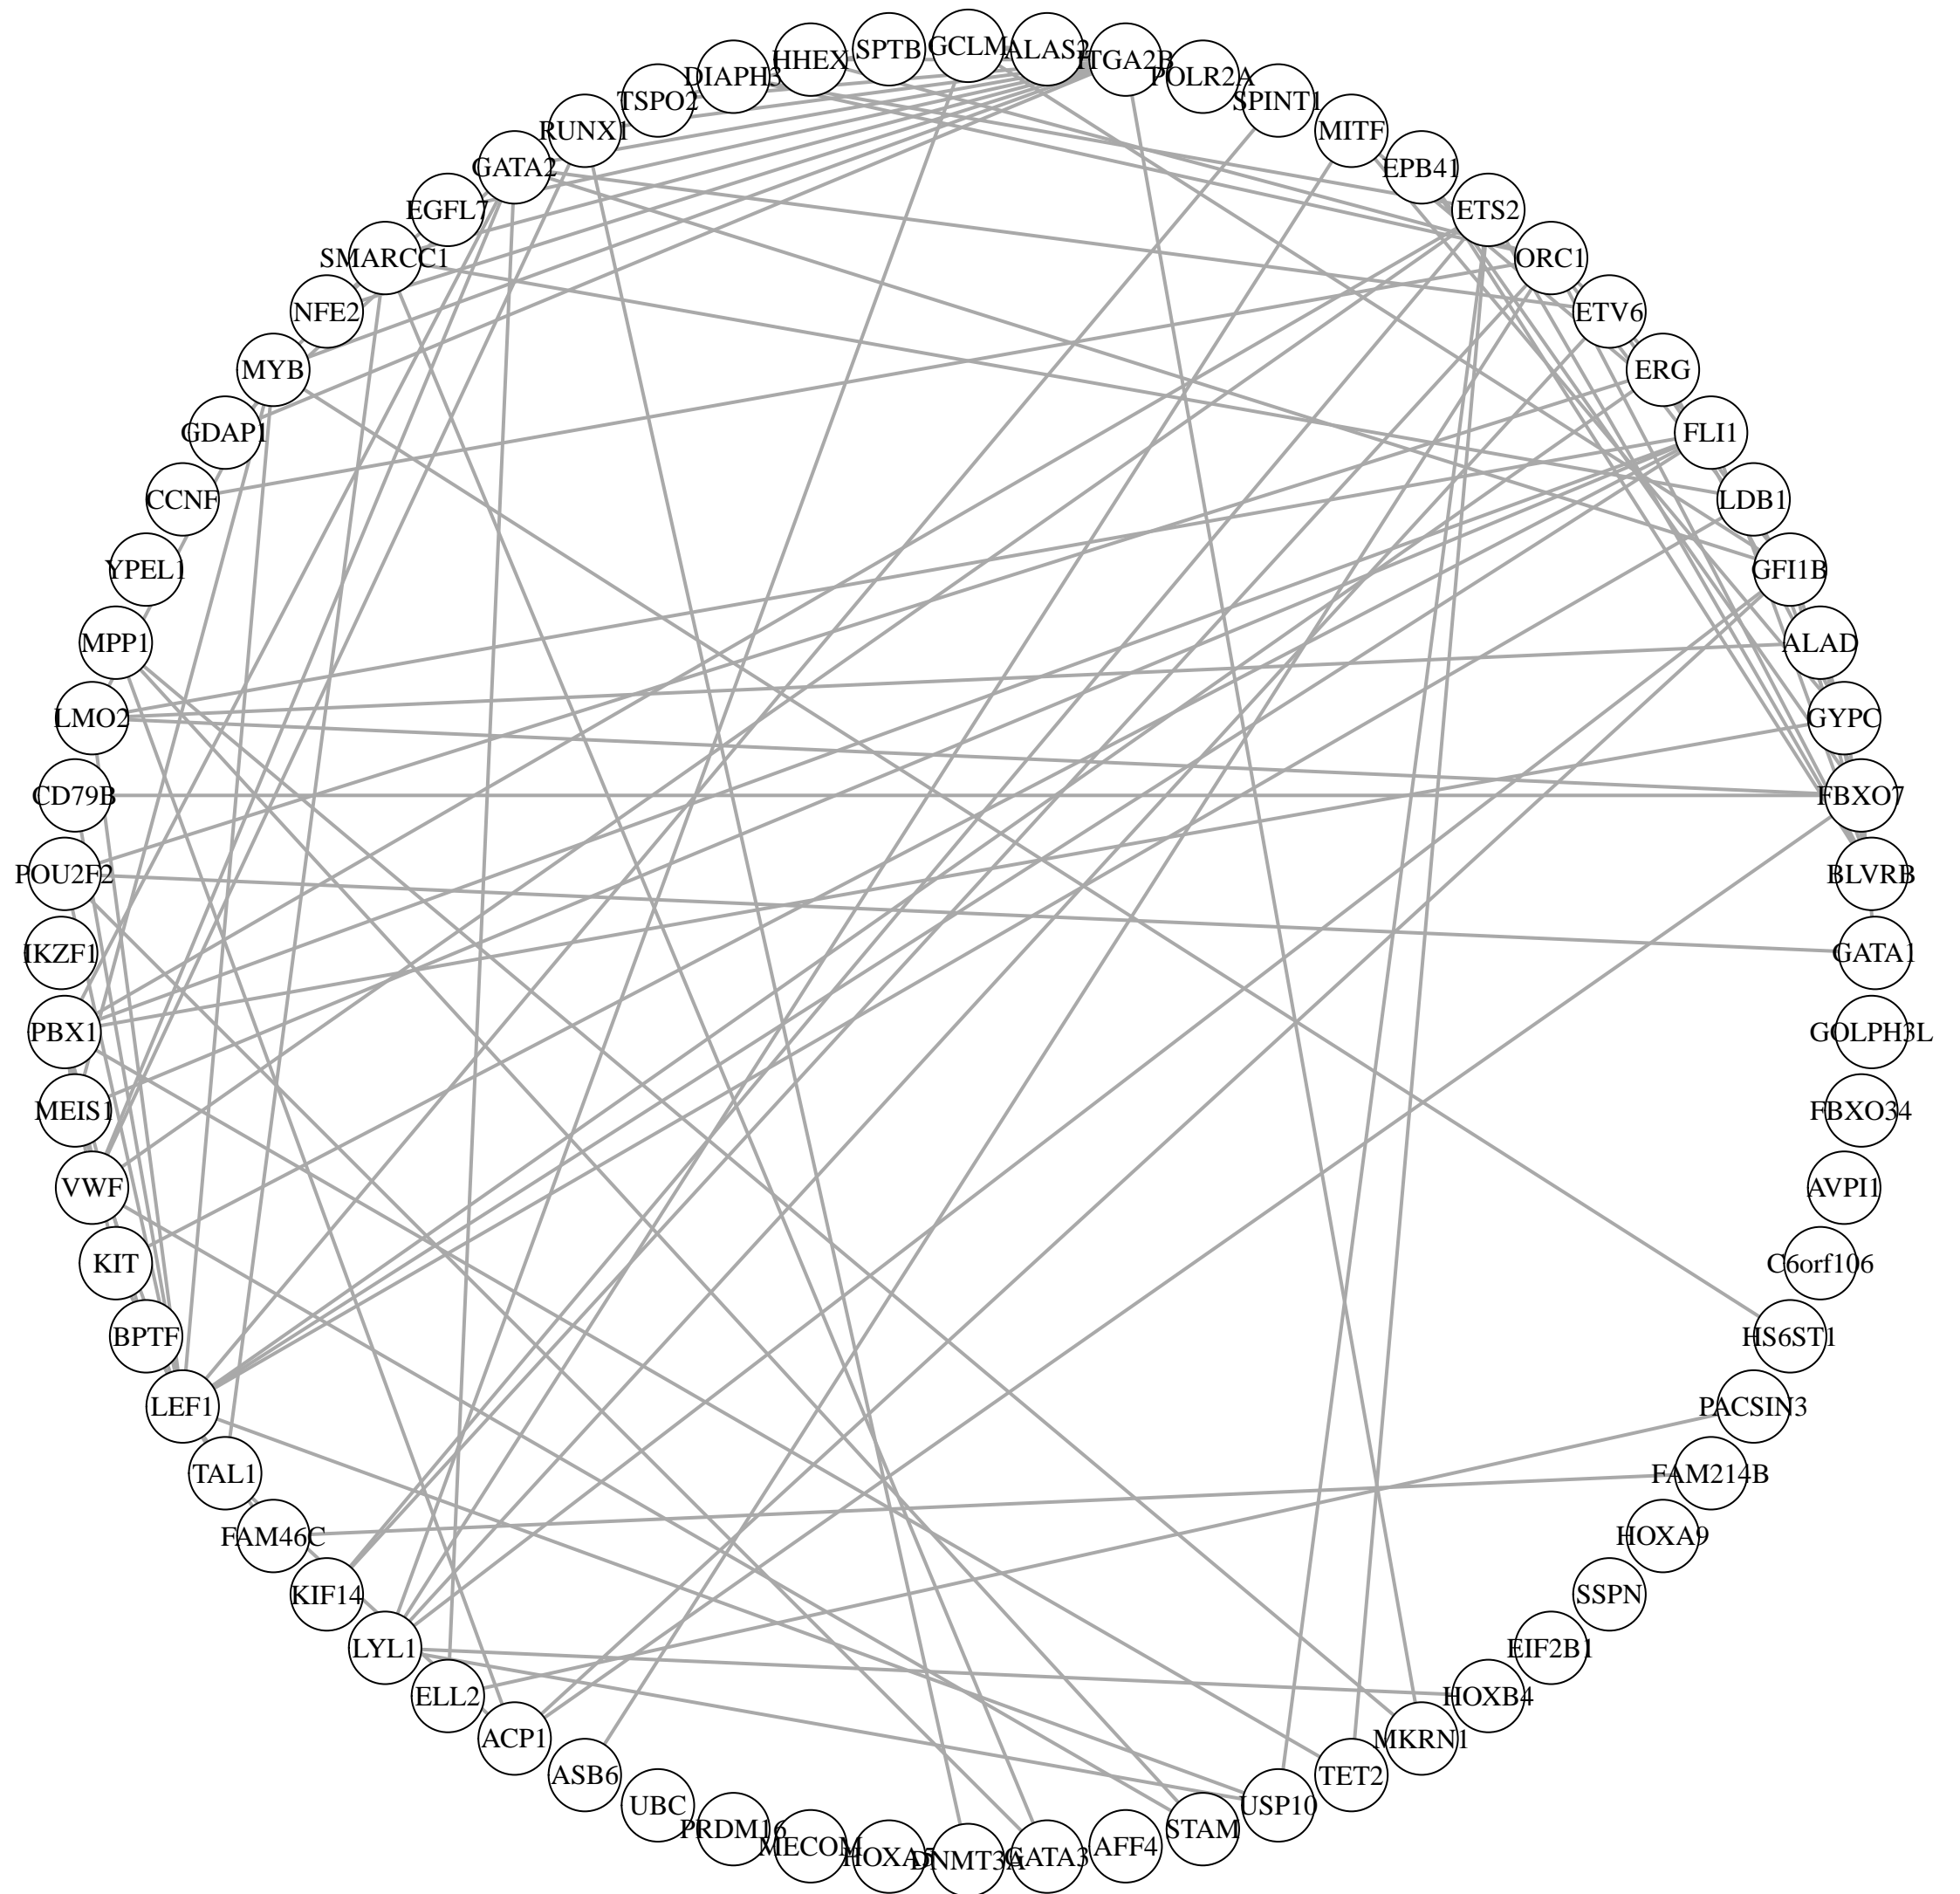

human\_HSCtoMEP\_time 15

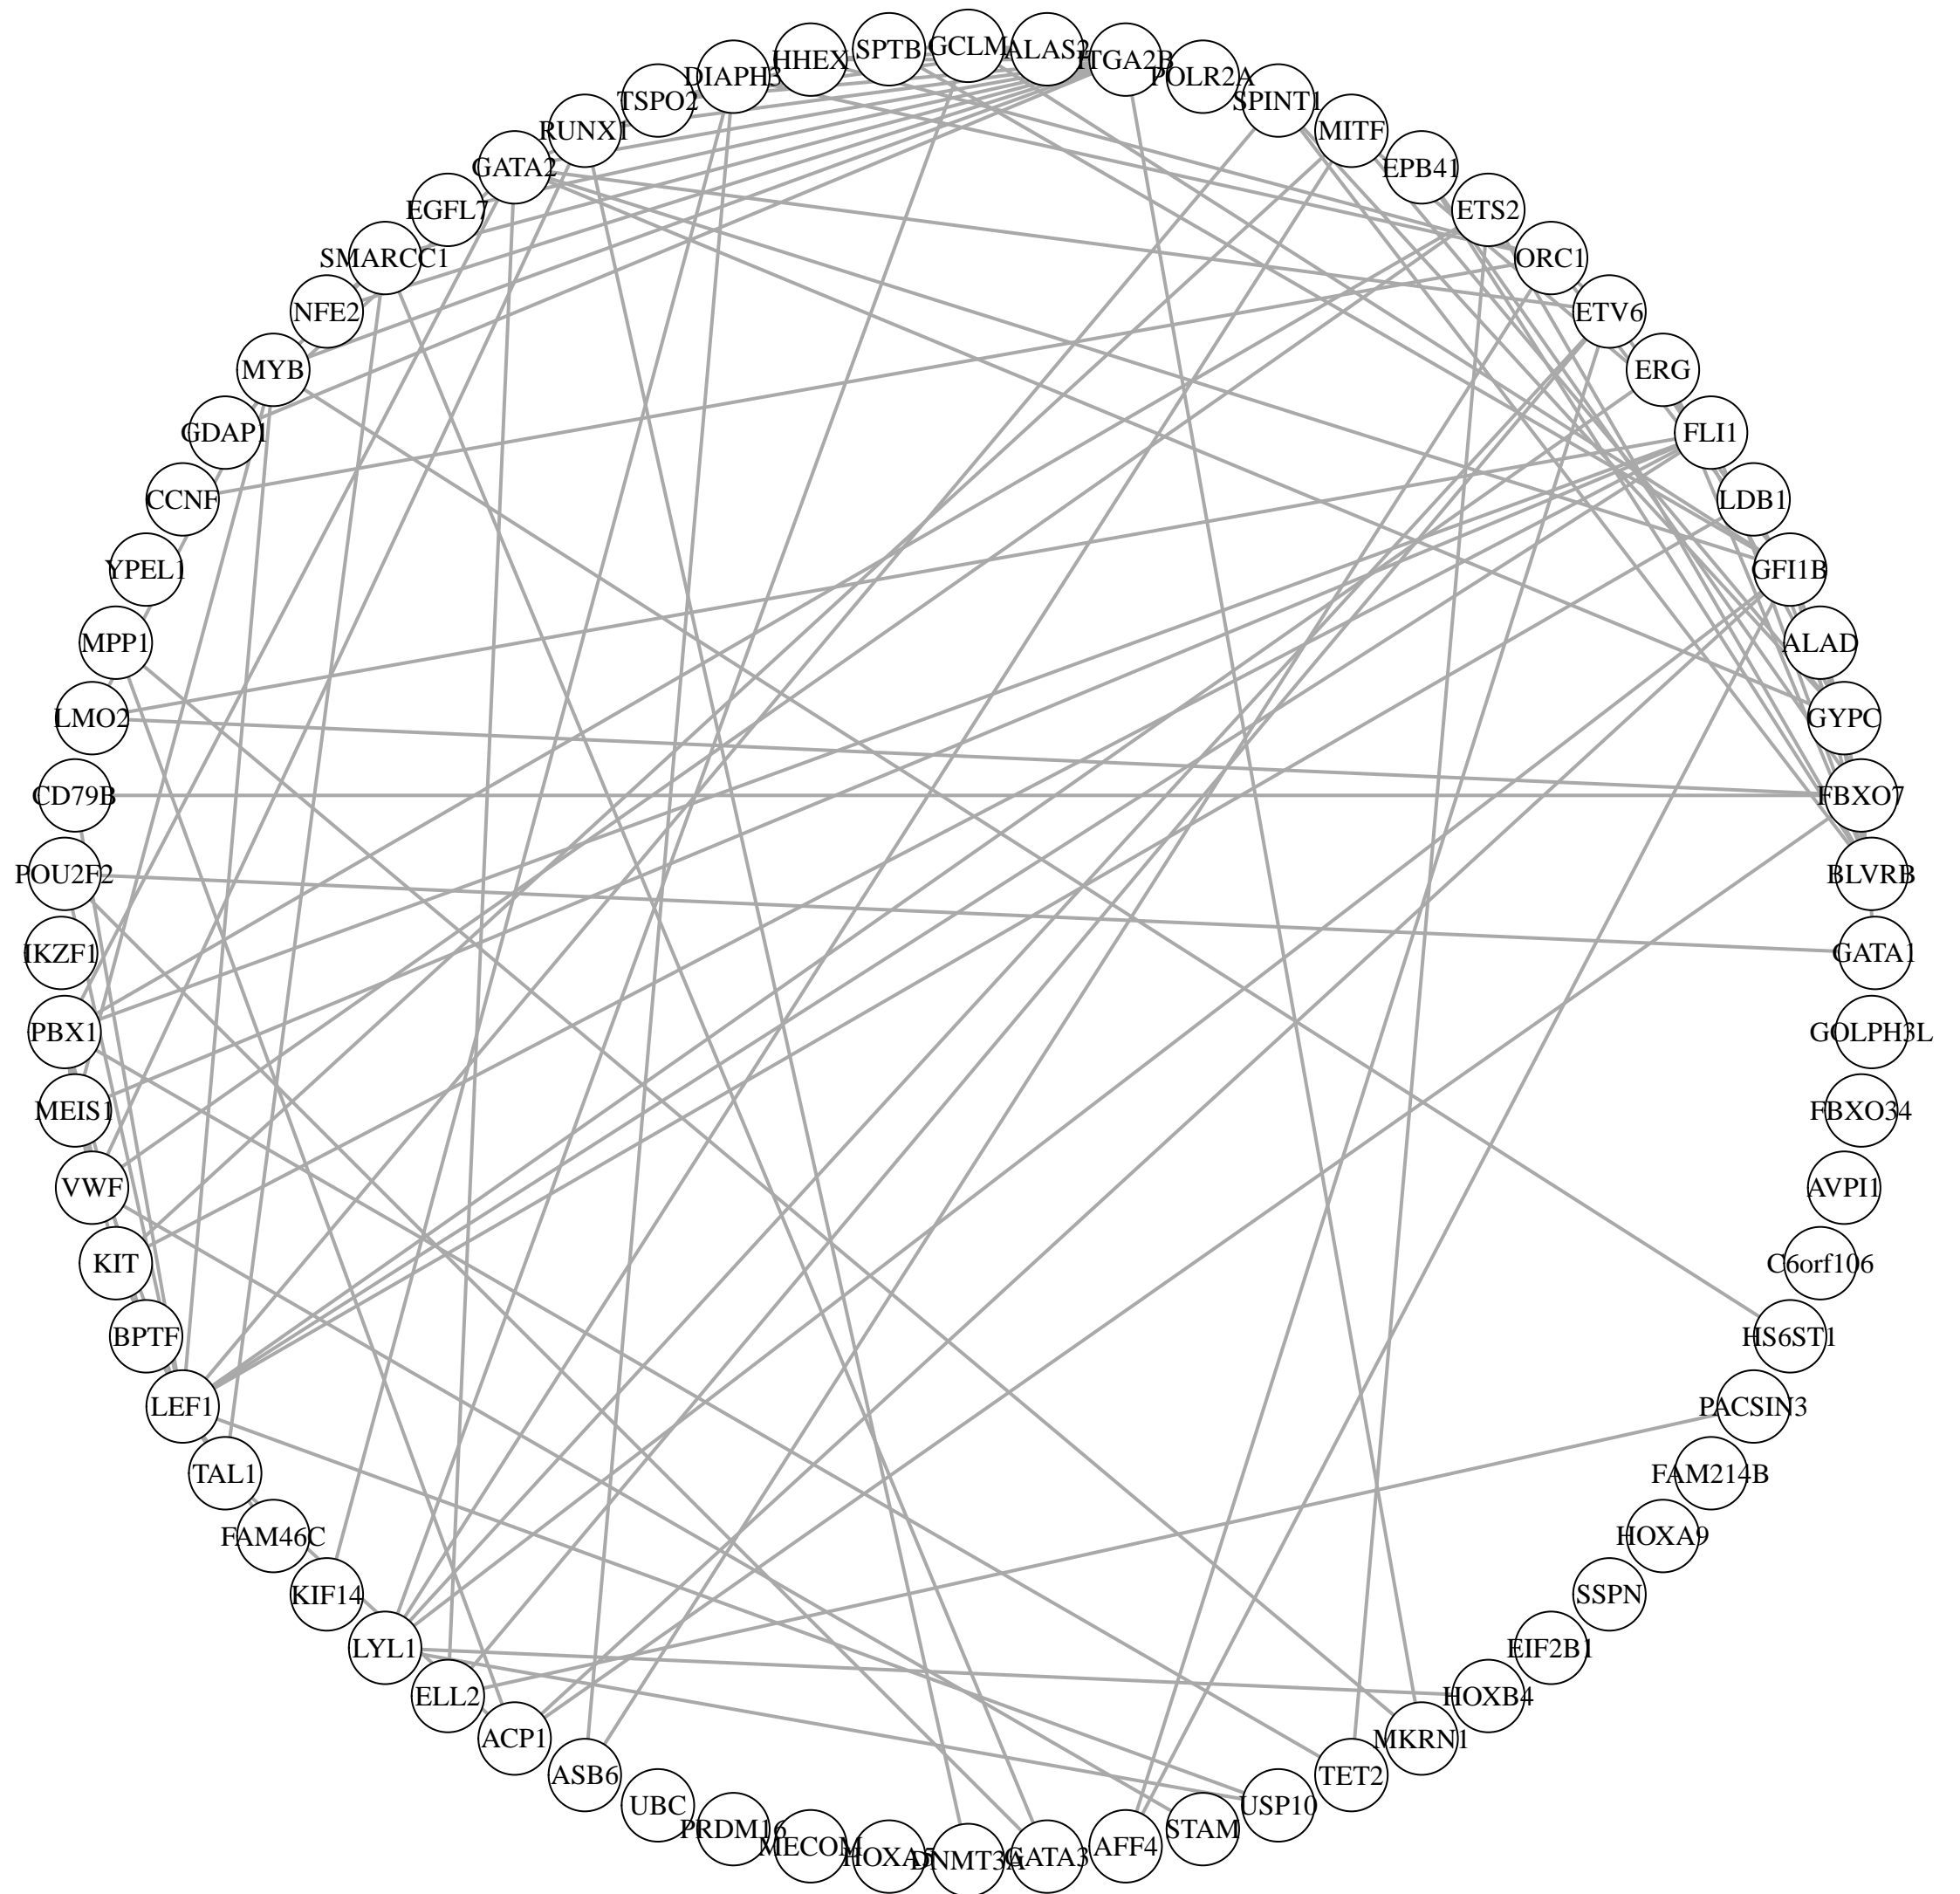



human\_HSCtoMEP\_time 16

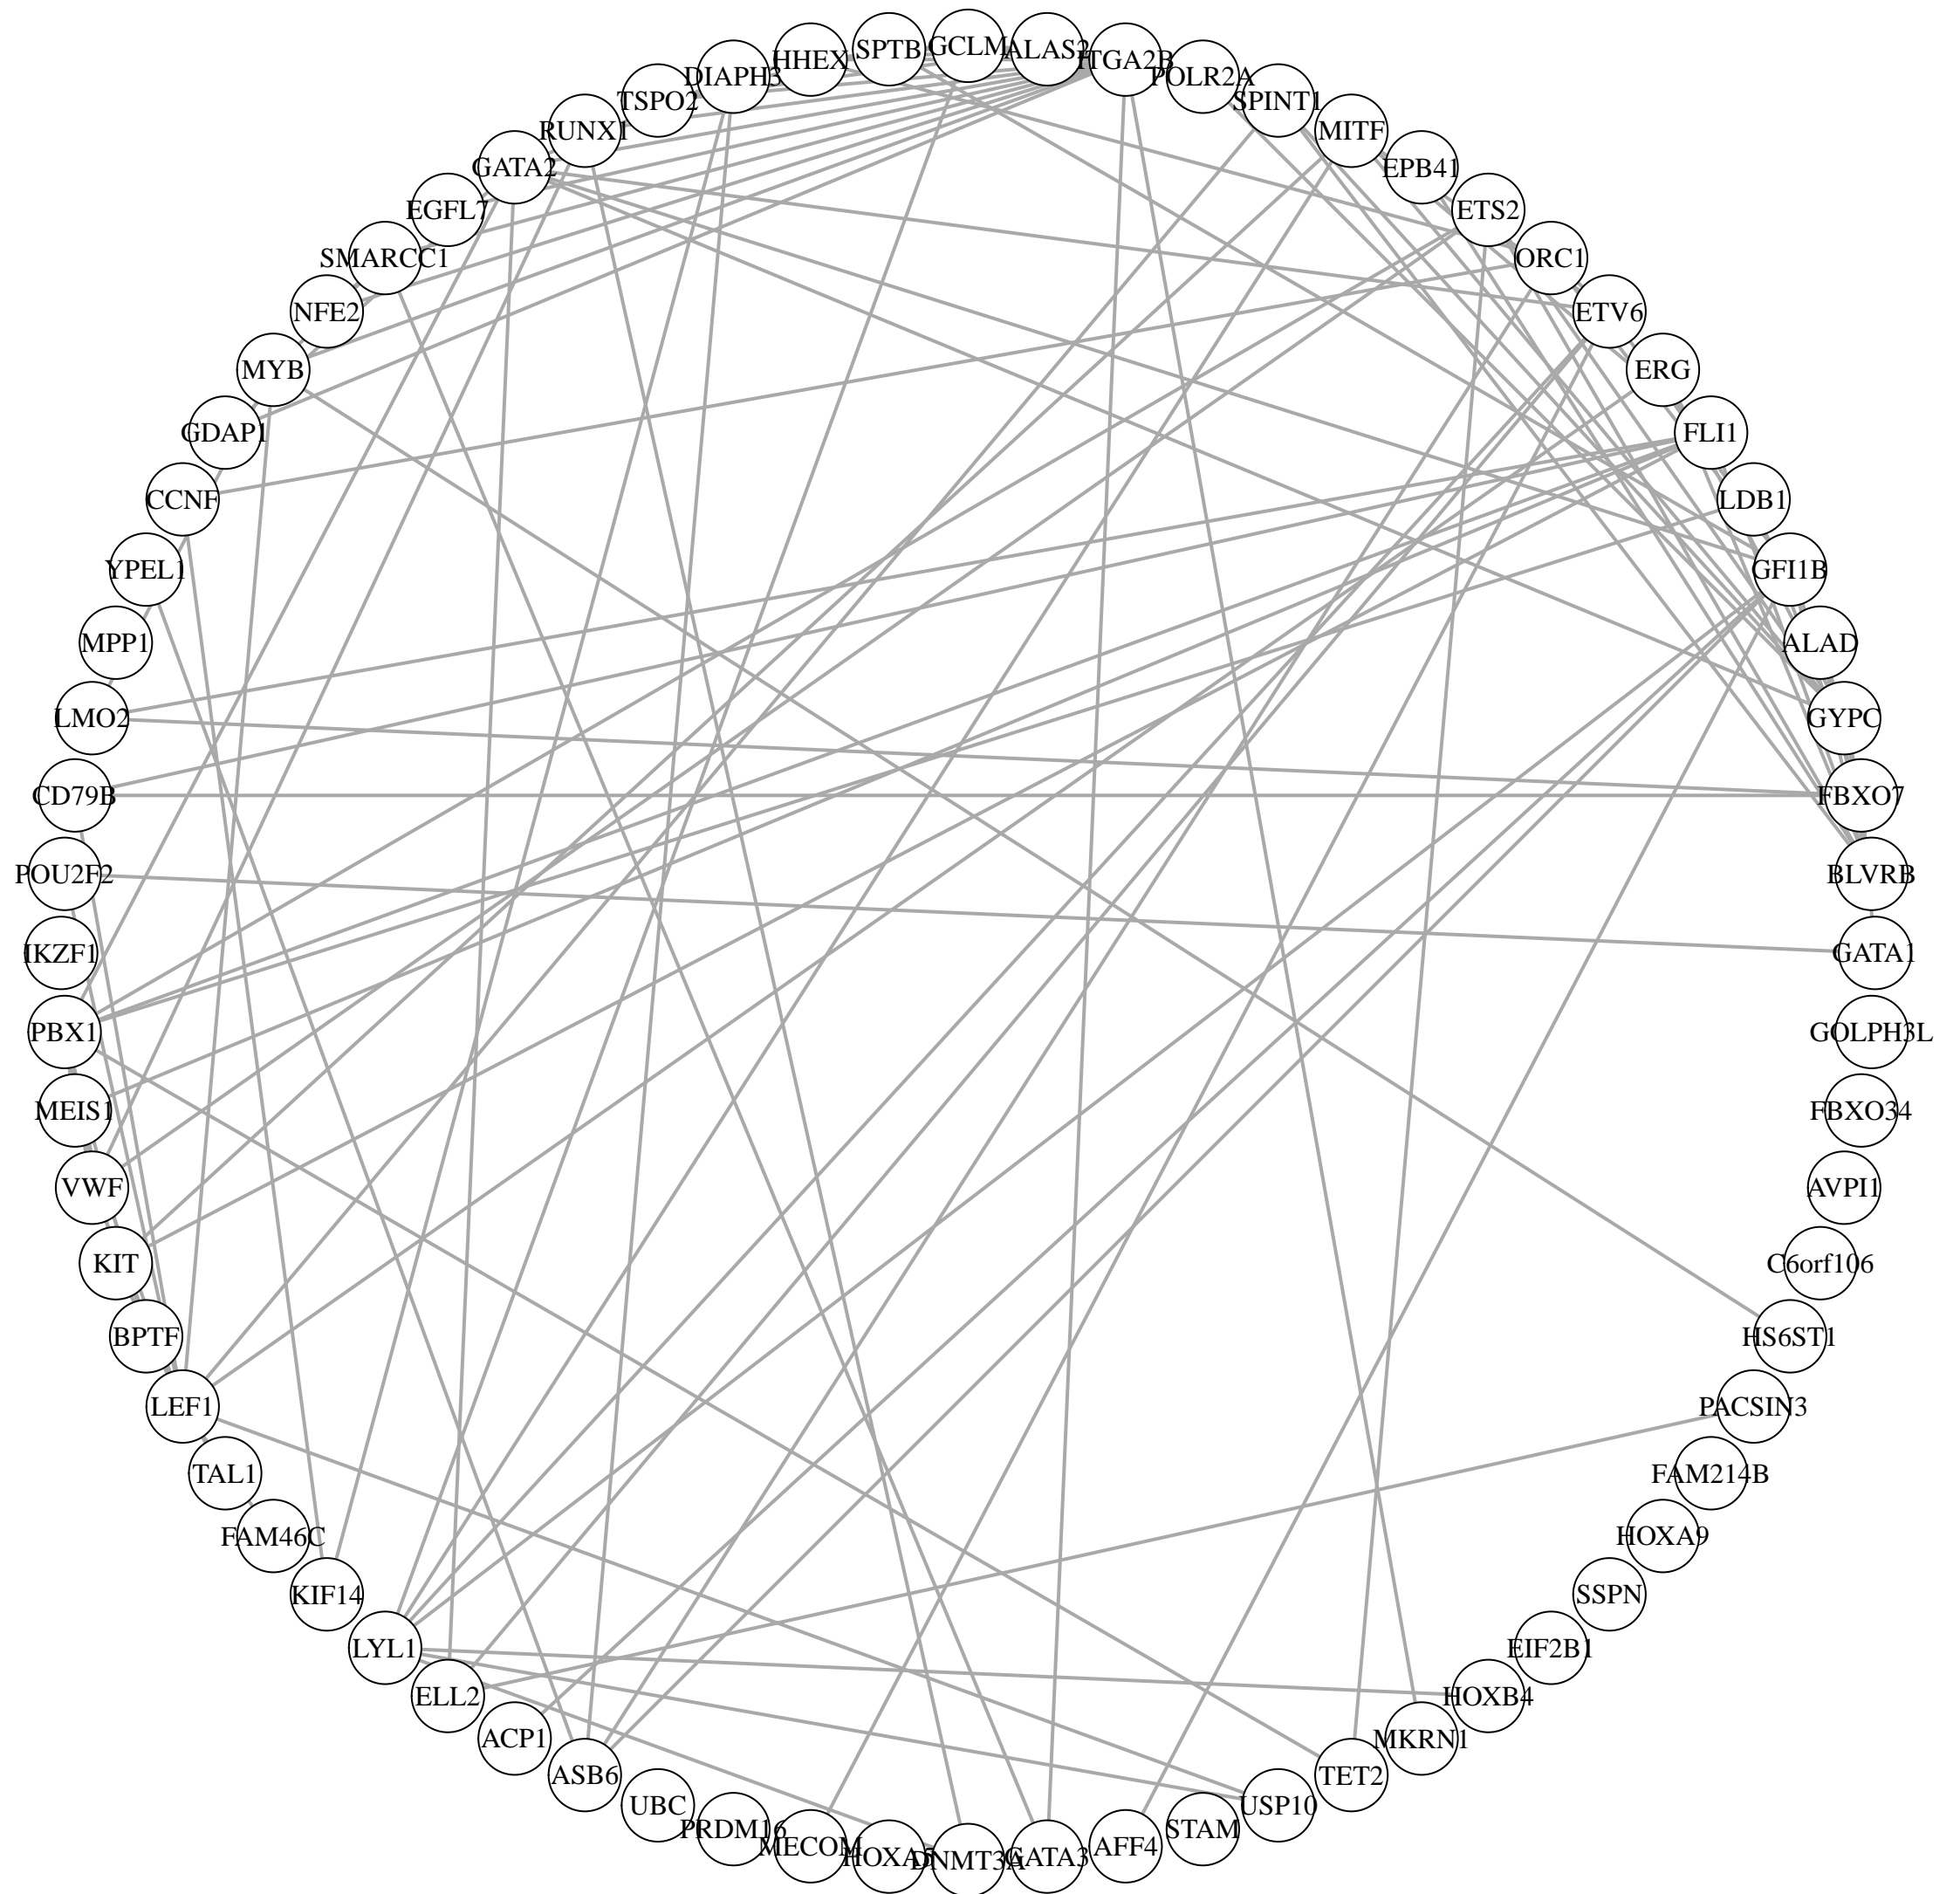

human\_HSCtoMEP\_time 17

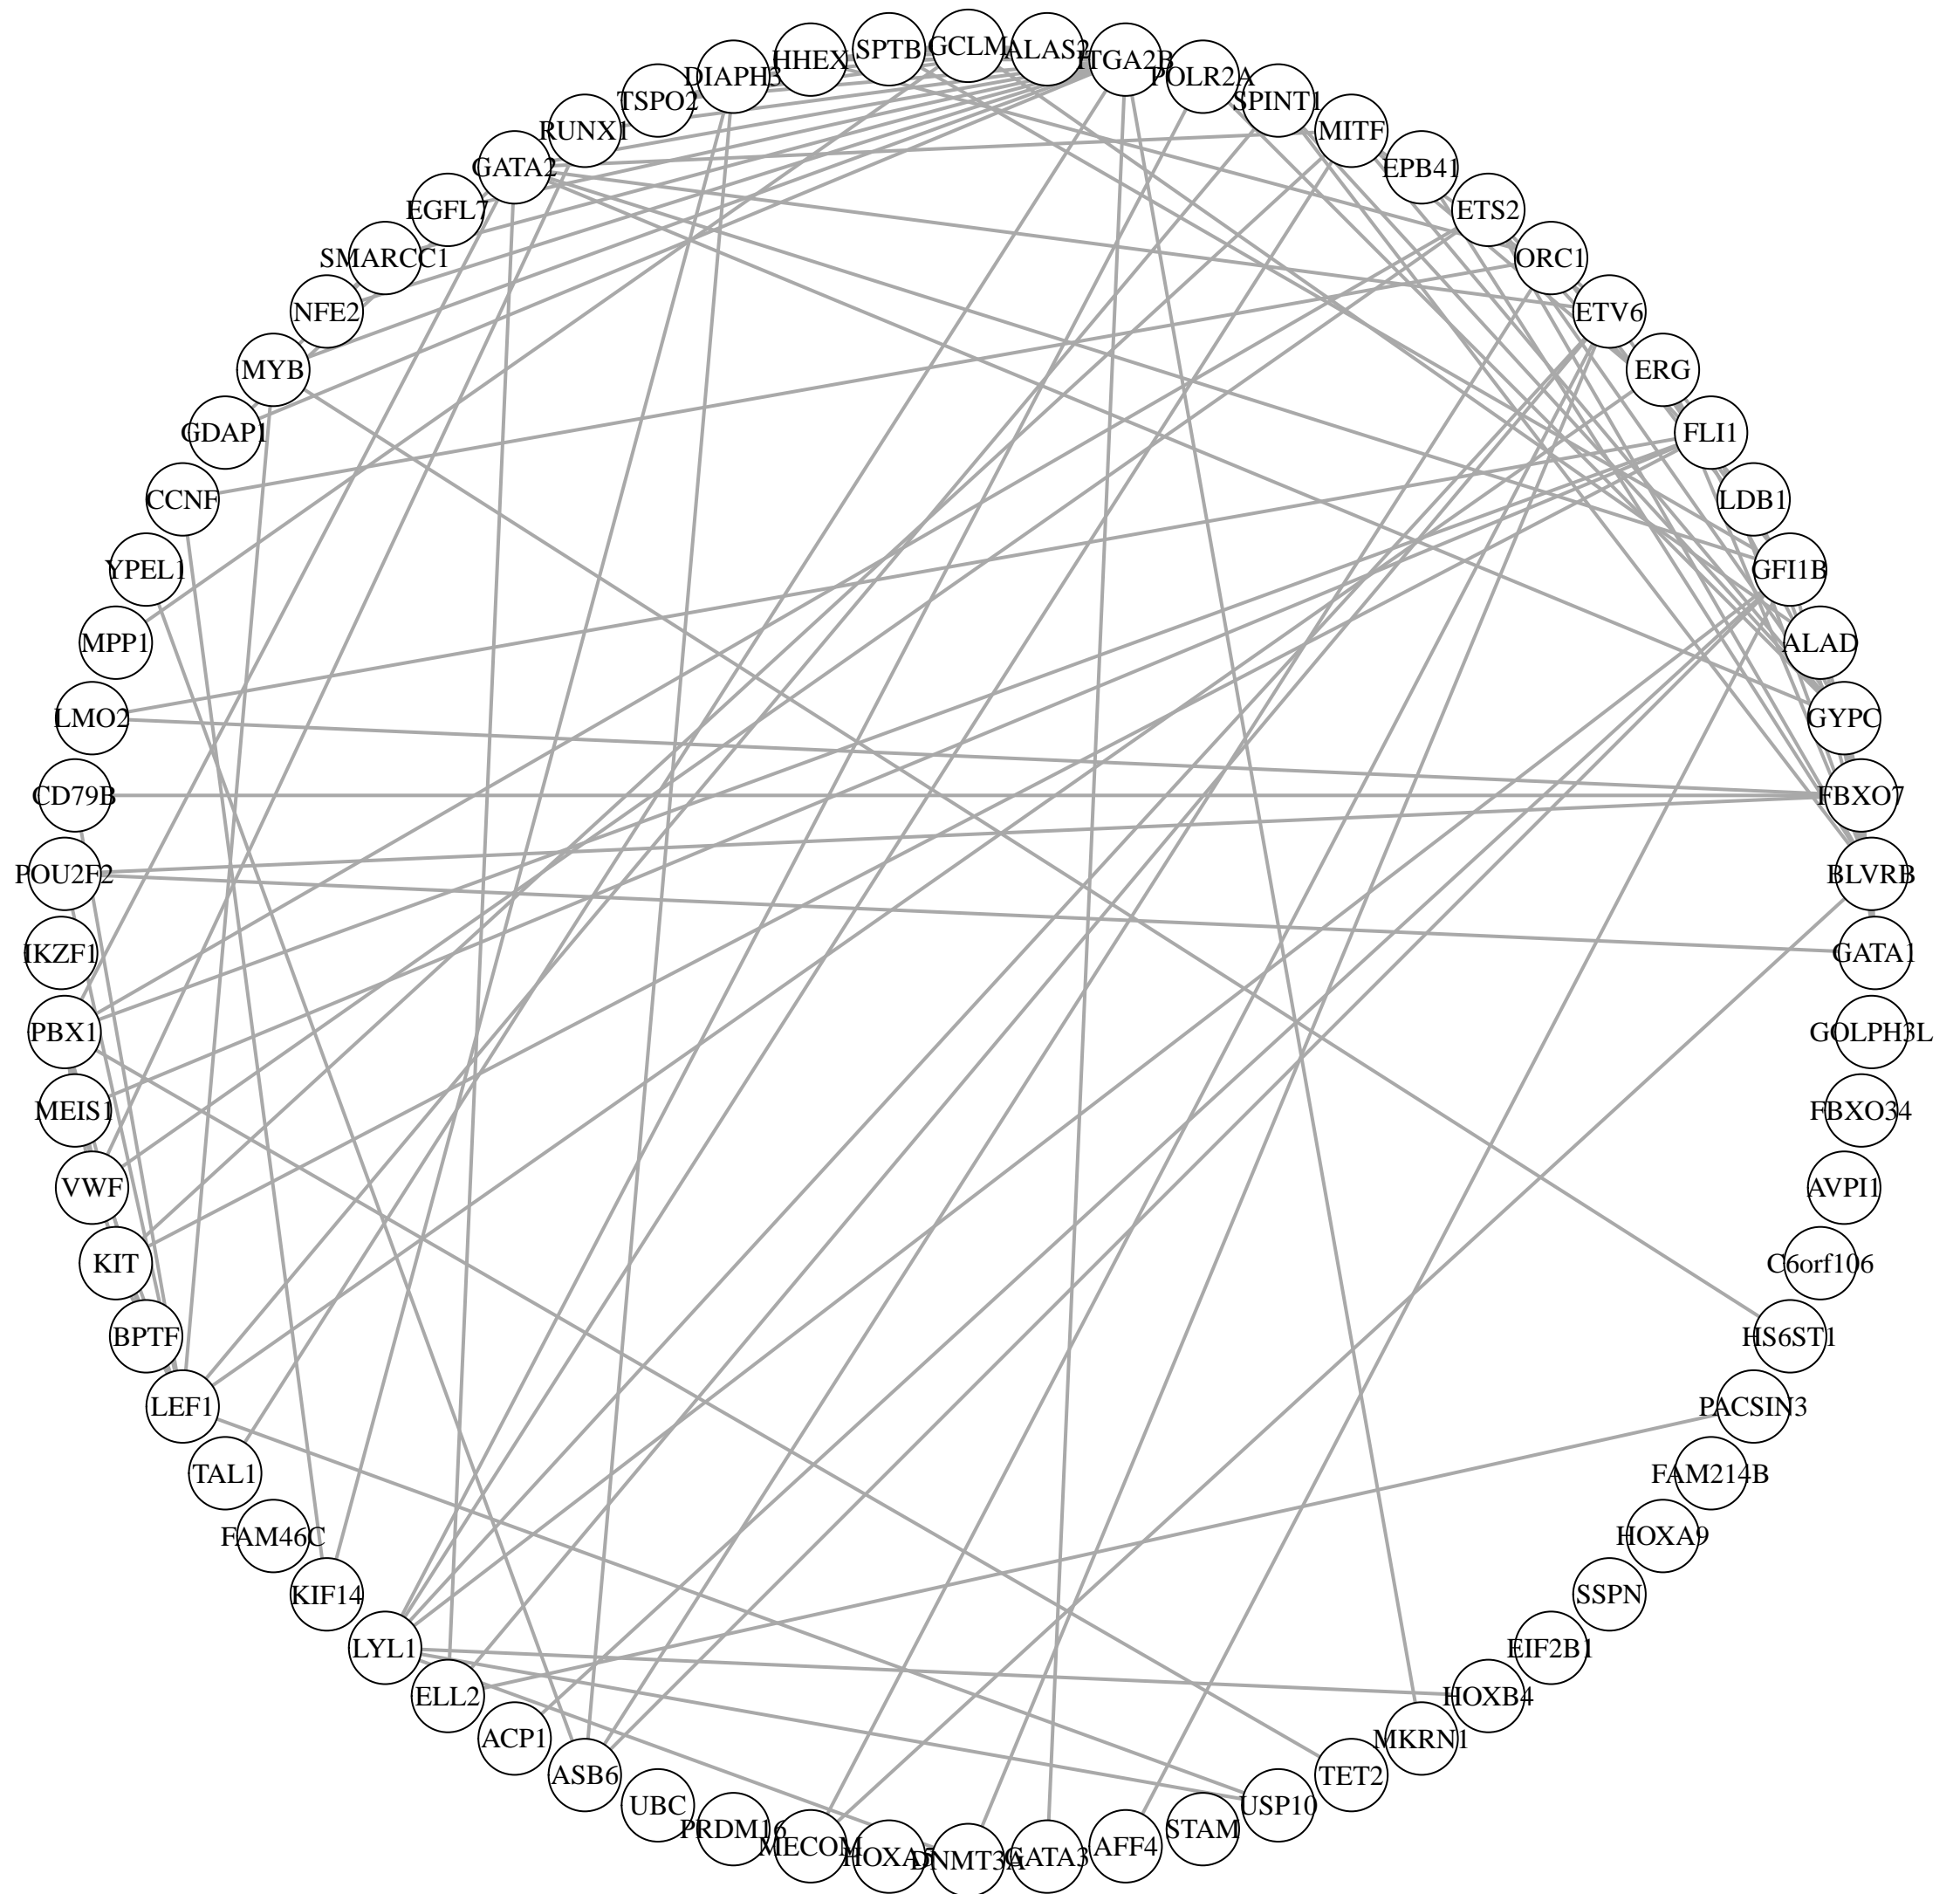

human\_HSCtoMEP\_time 18

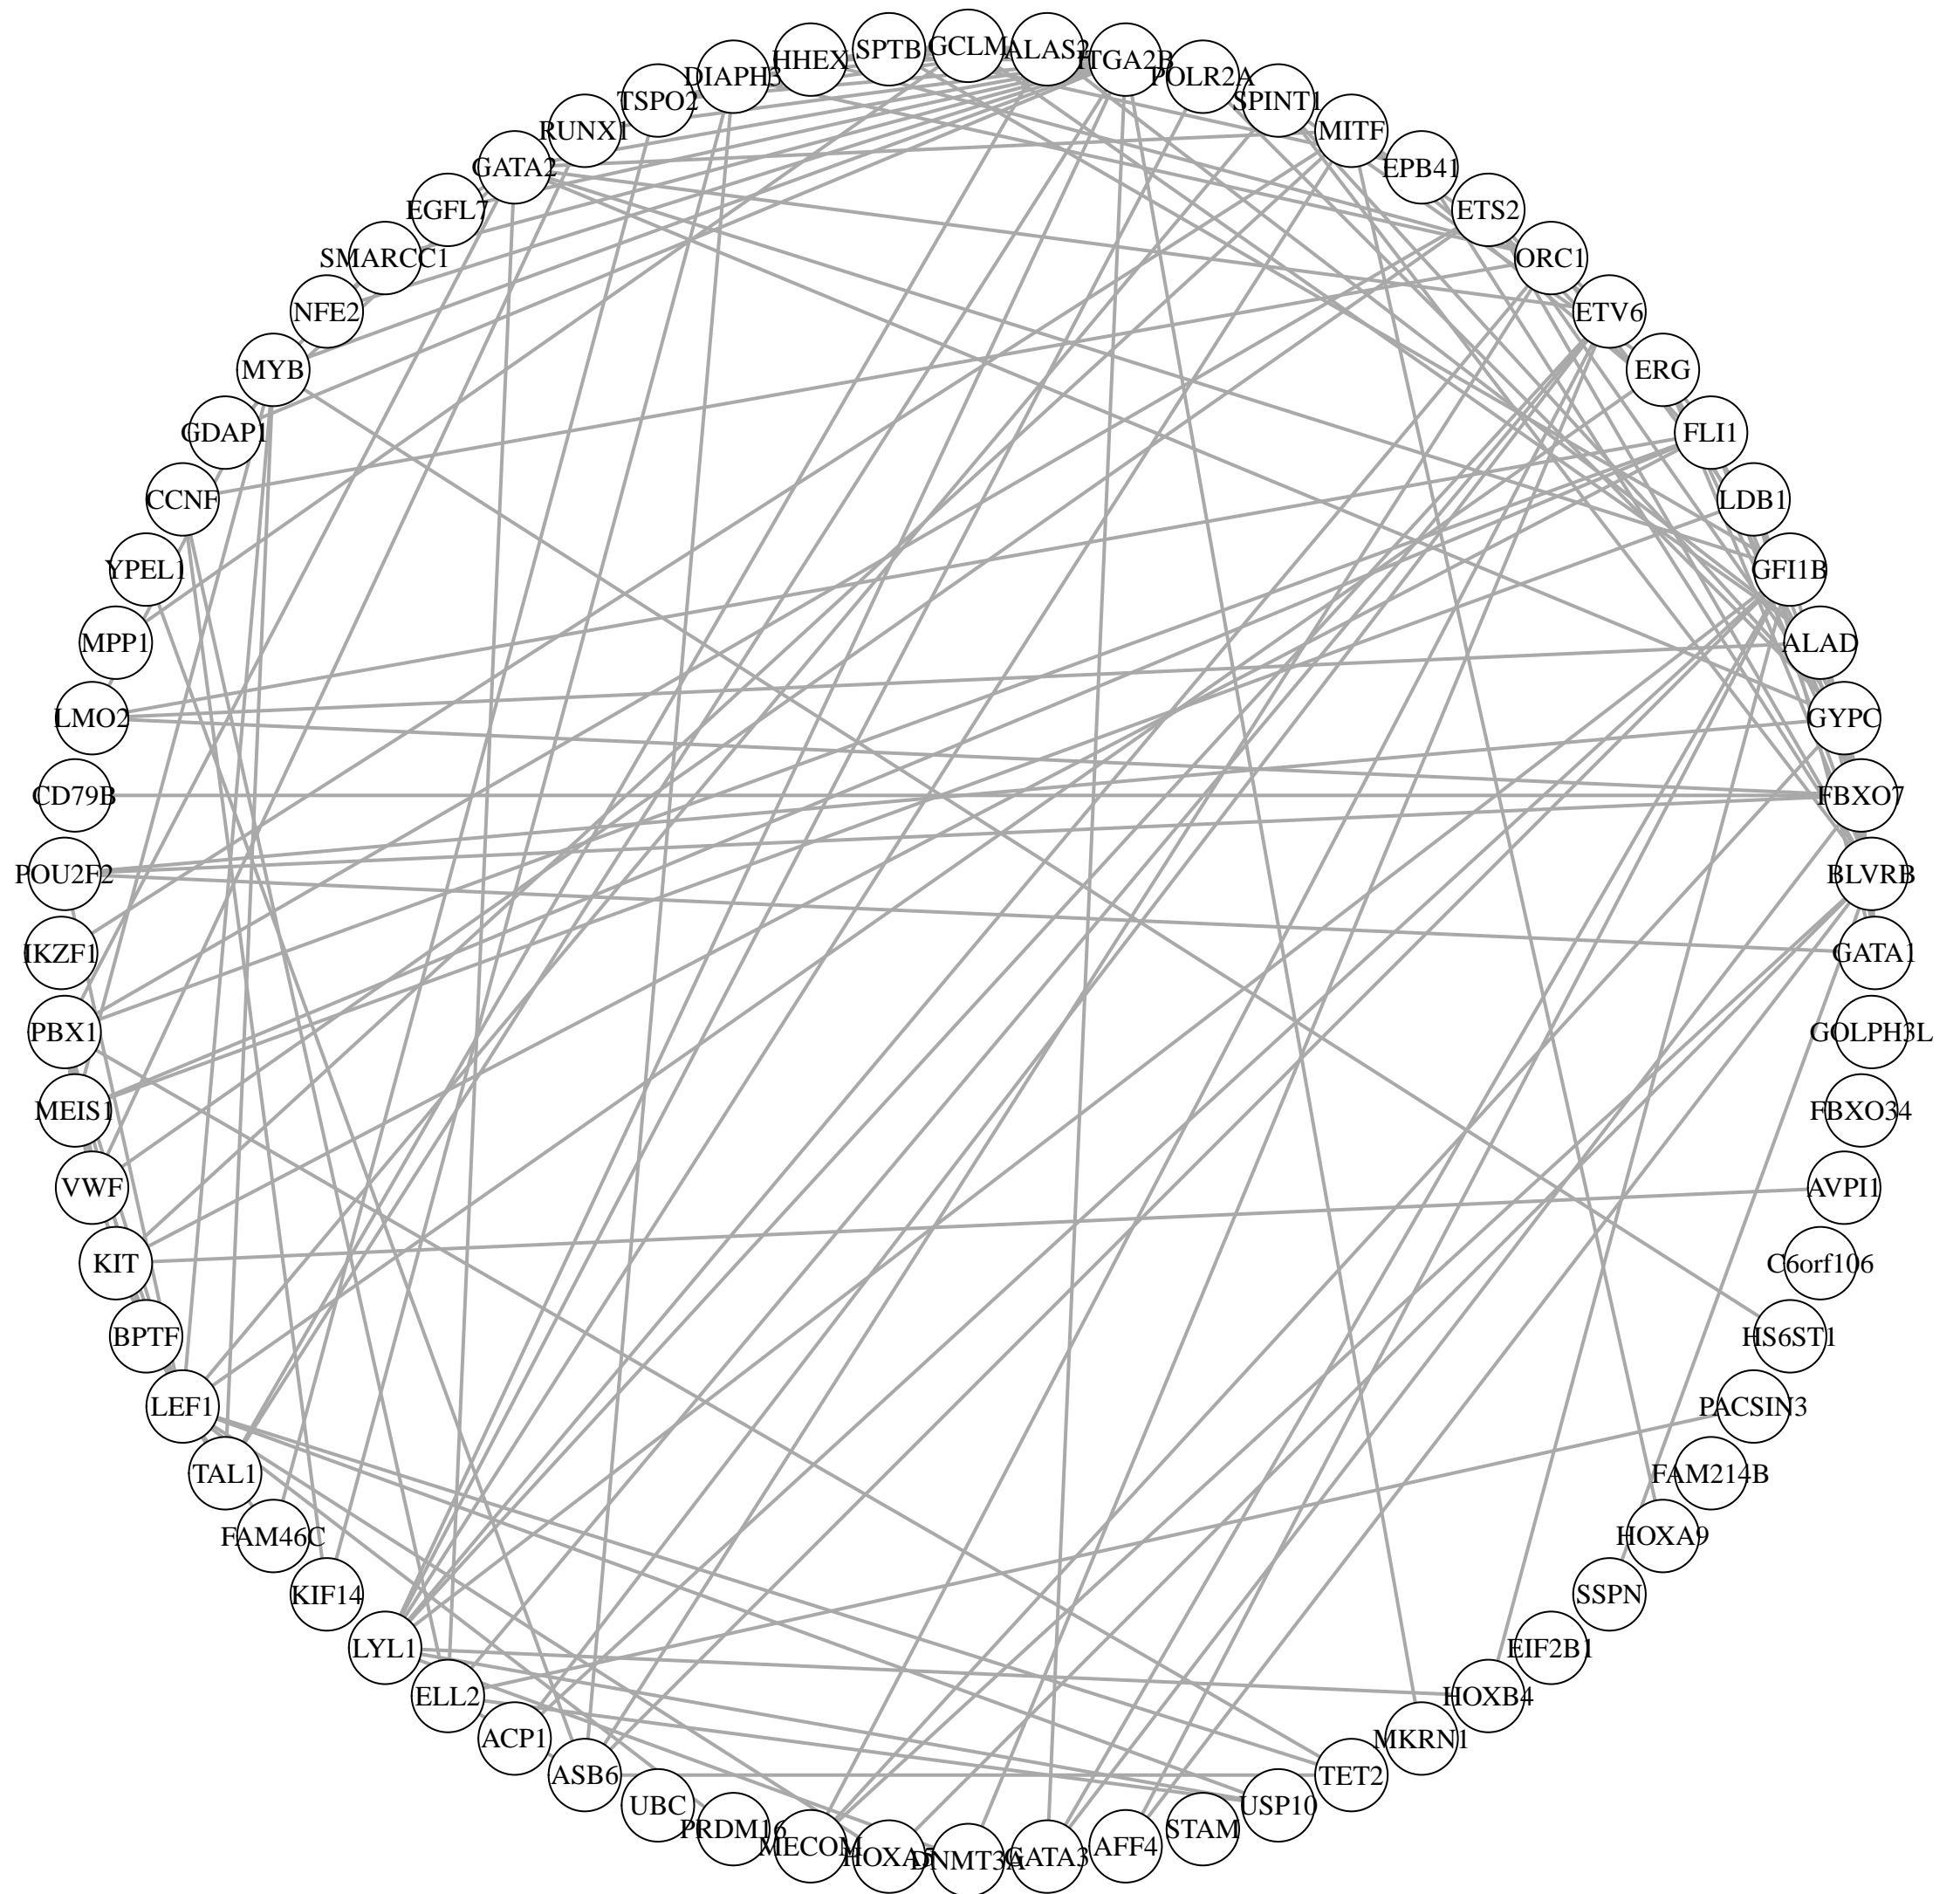

human\_HSCtoMEP\_time 19

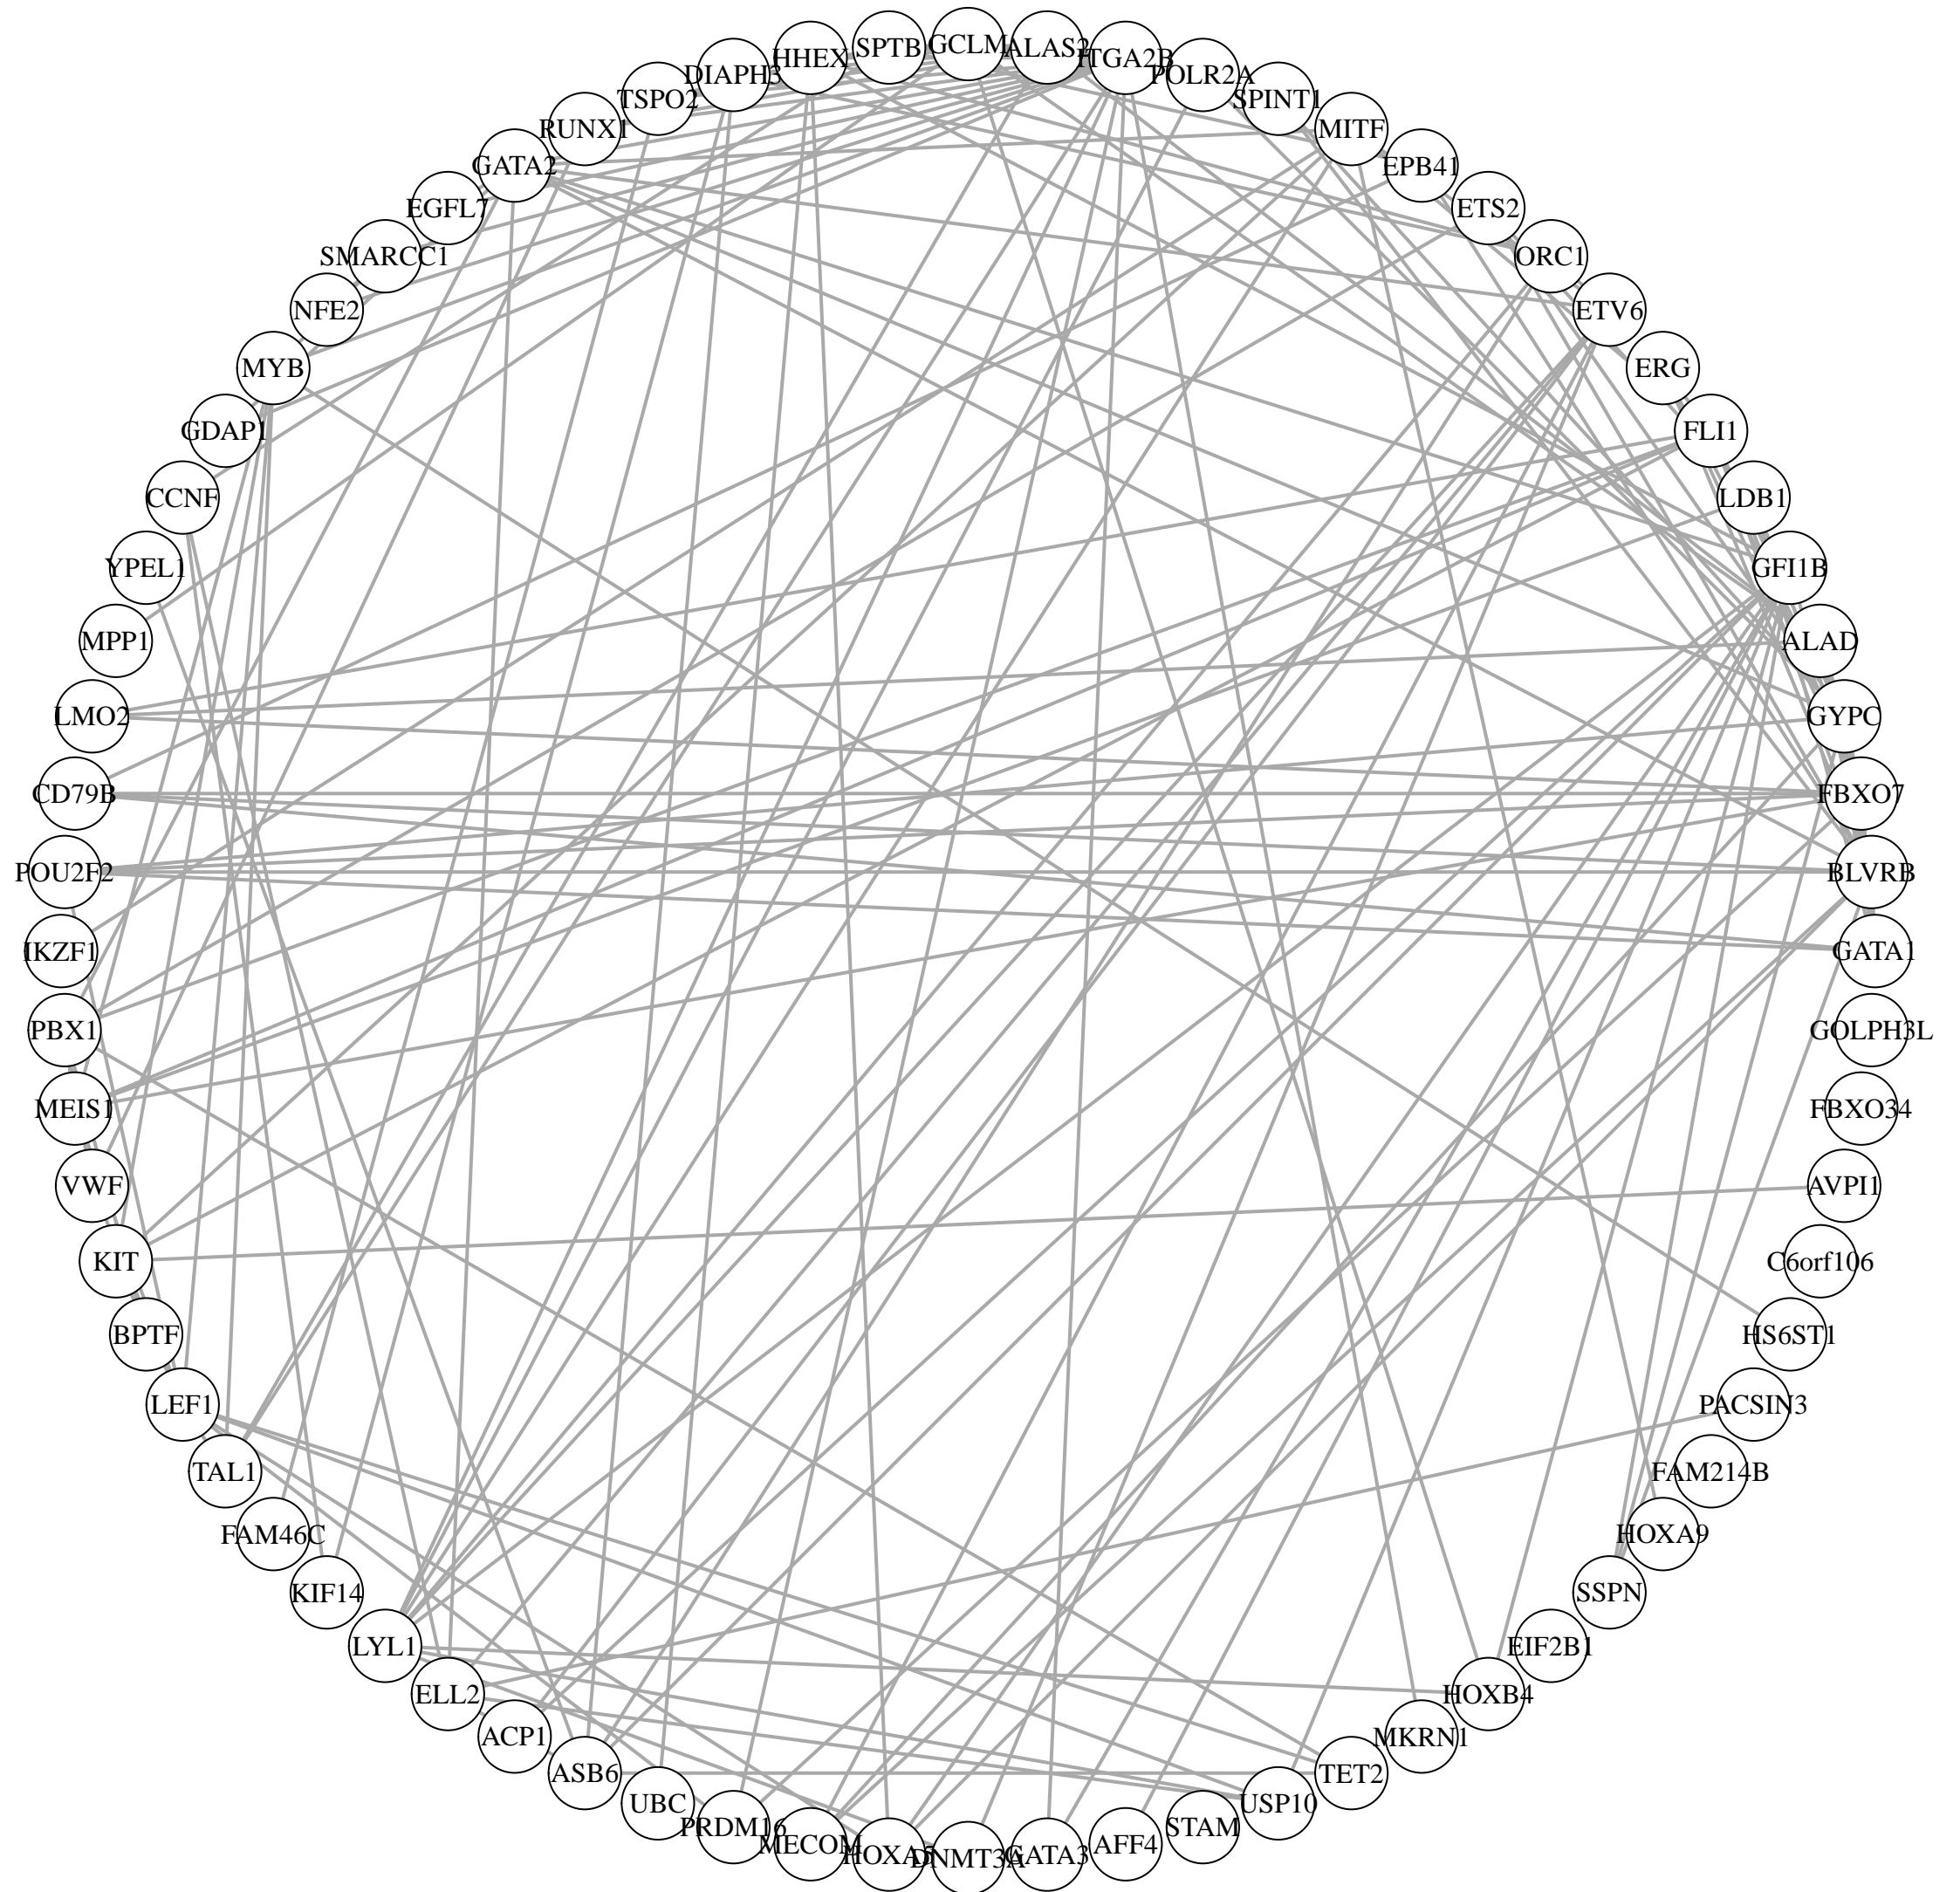

human\_HSCtoMEP\_time 20

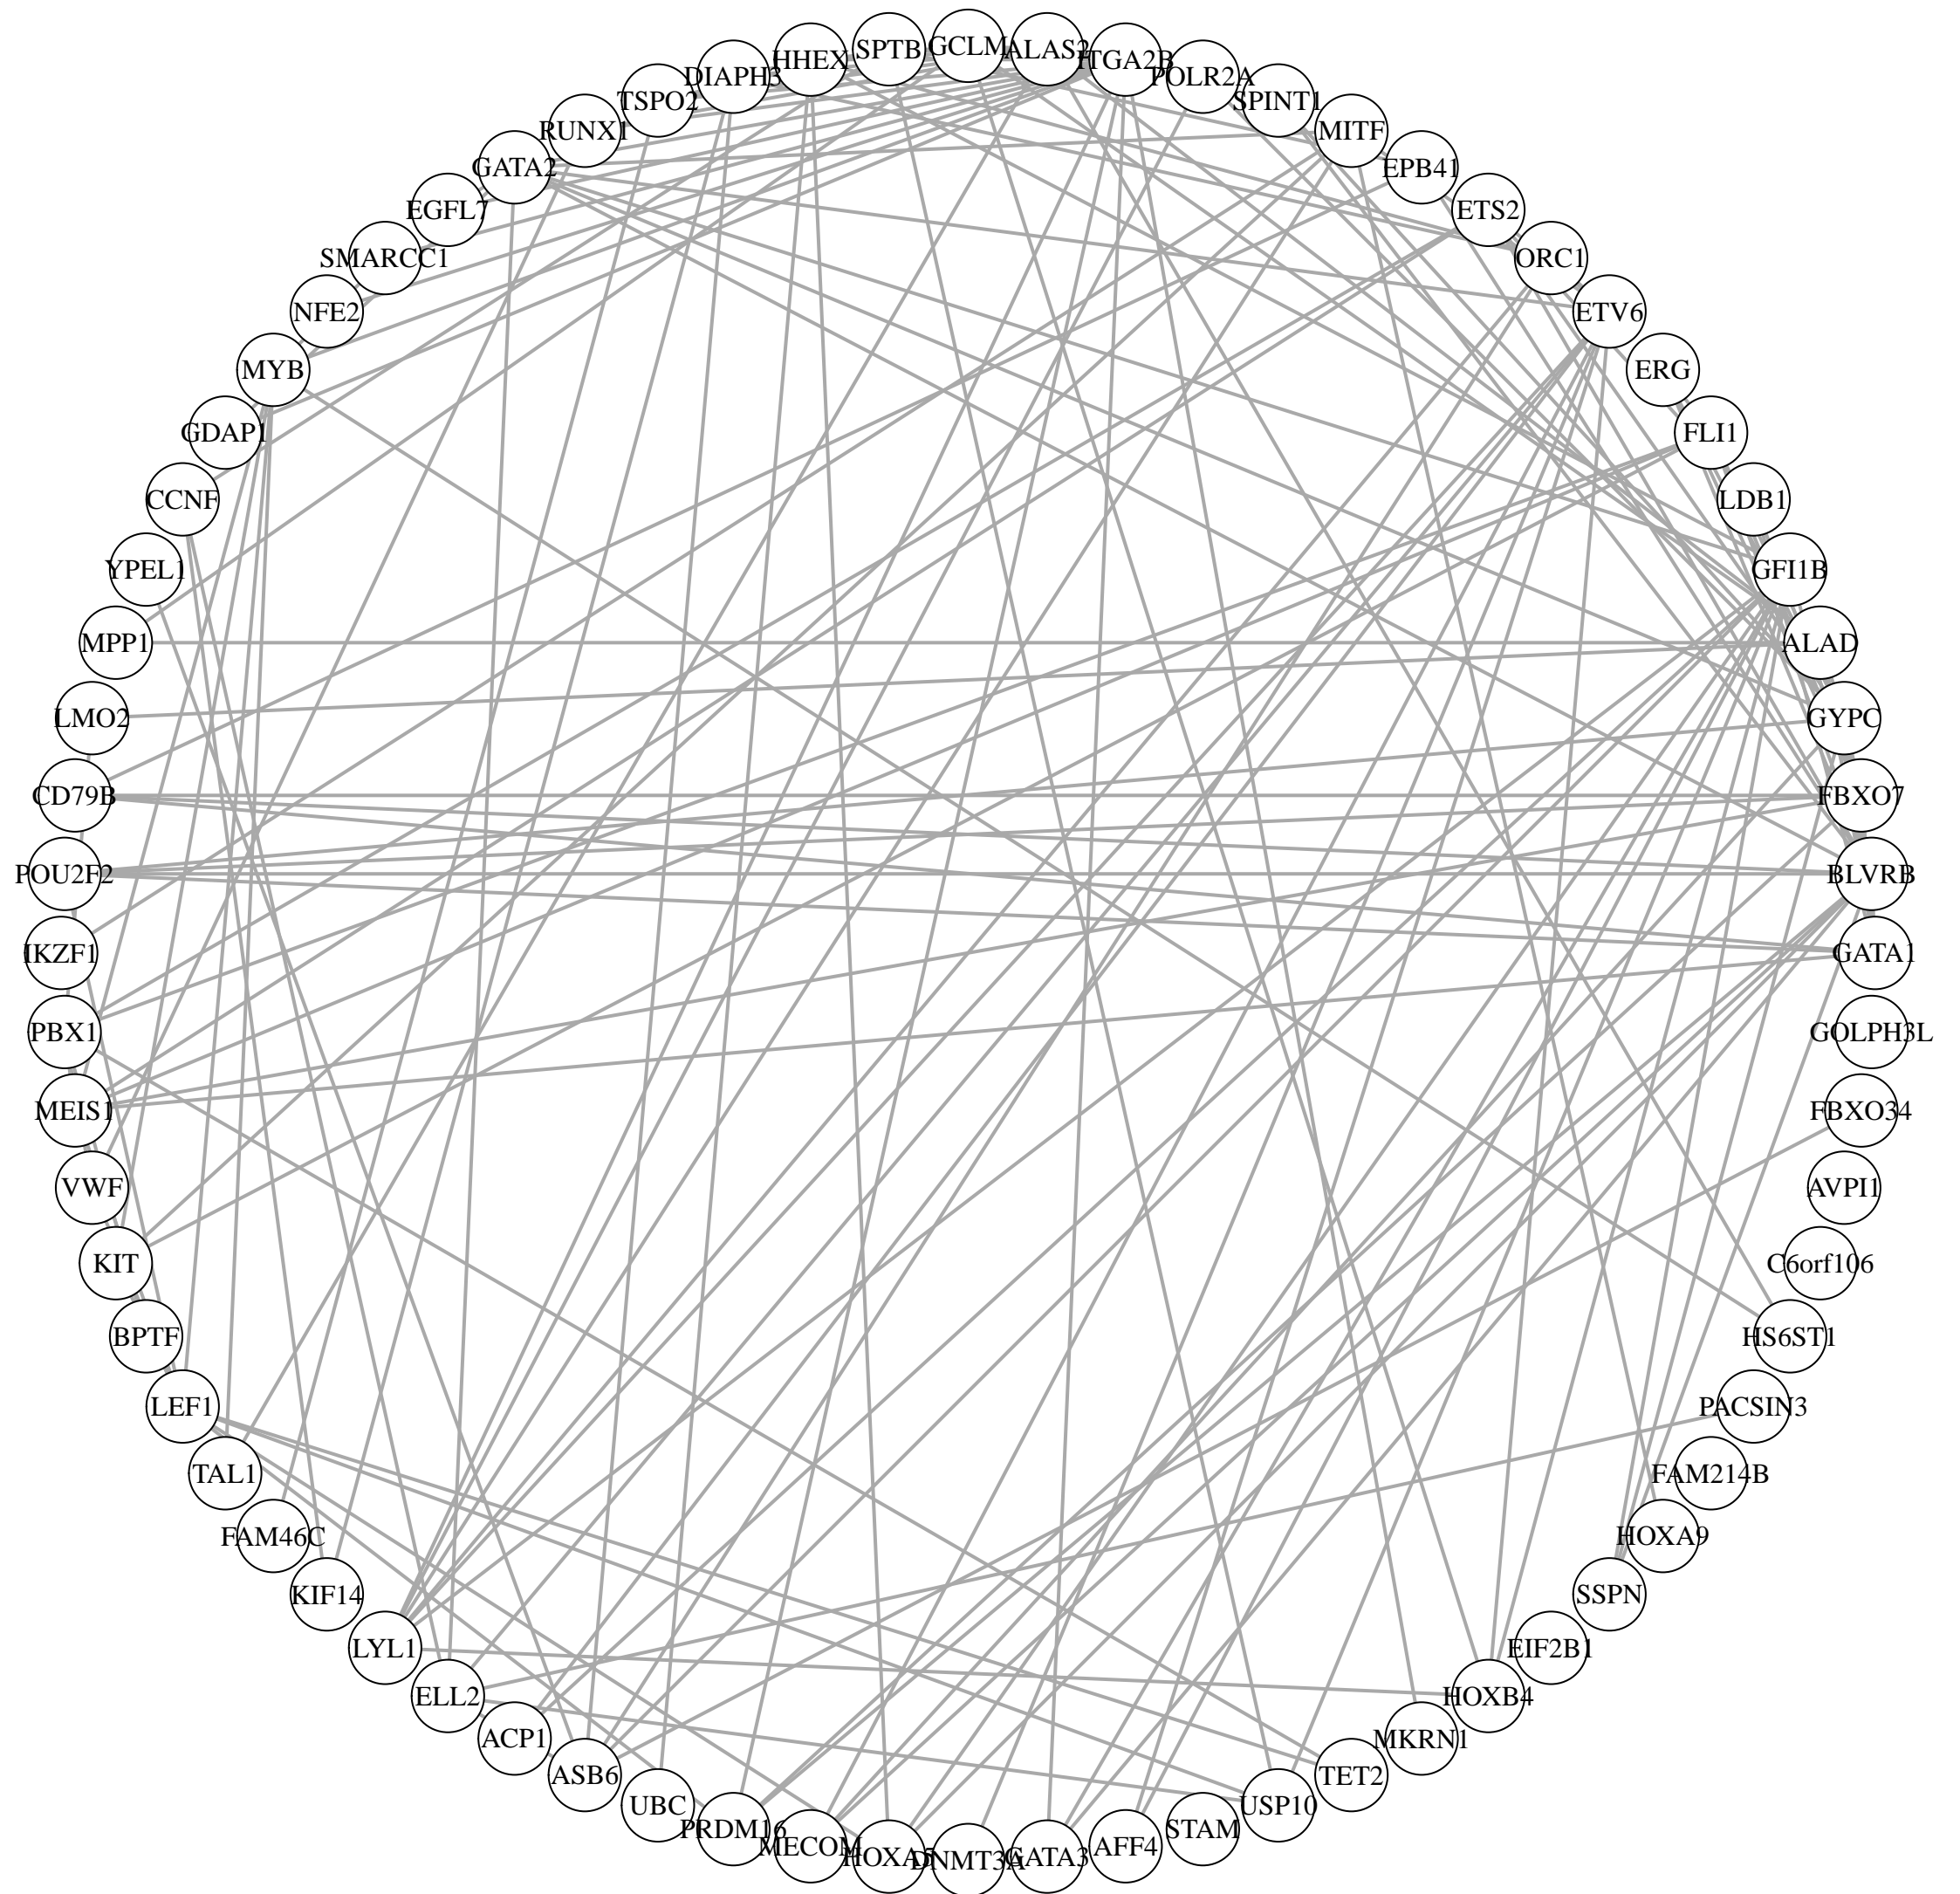



human\_HSCtoMEP\_time 21

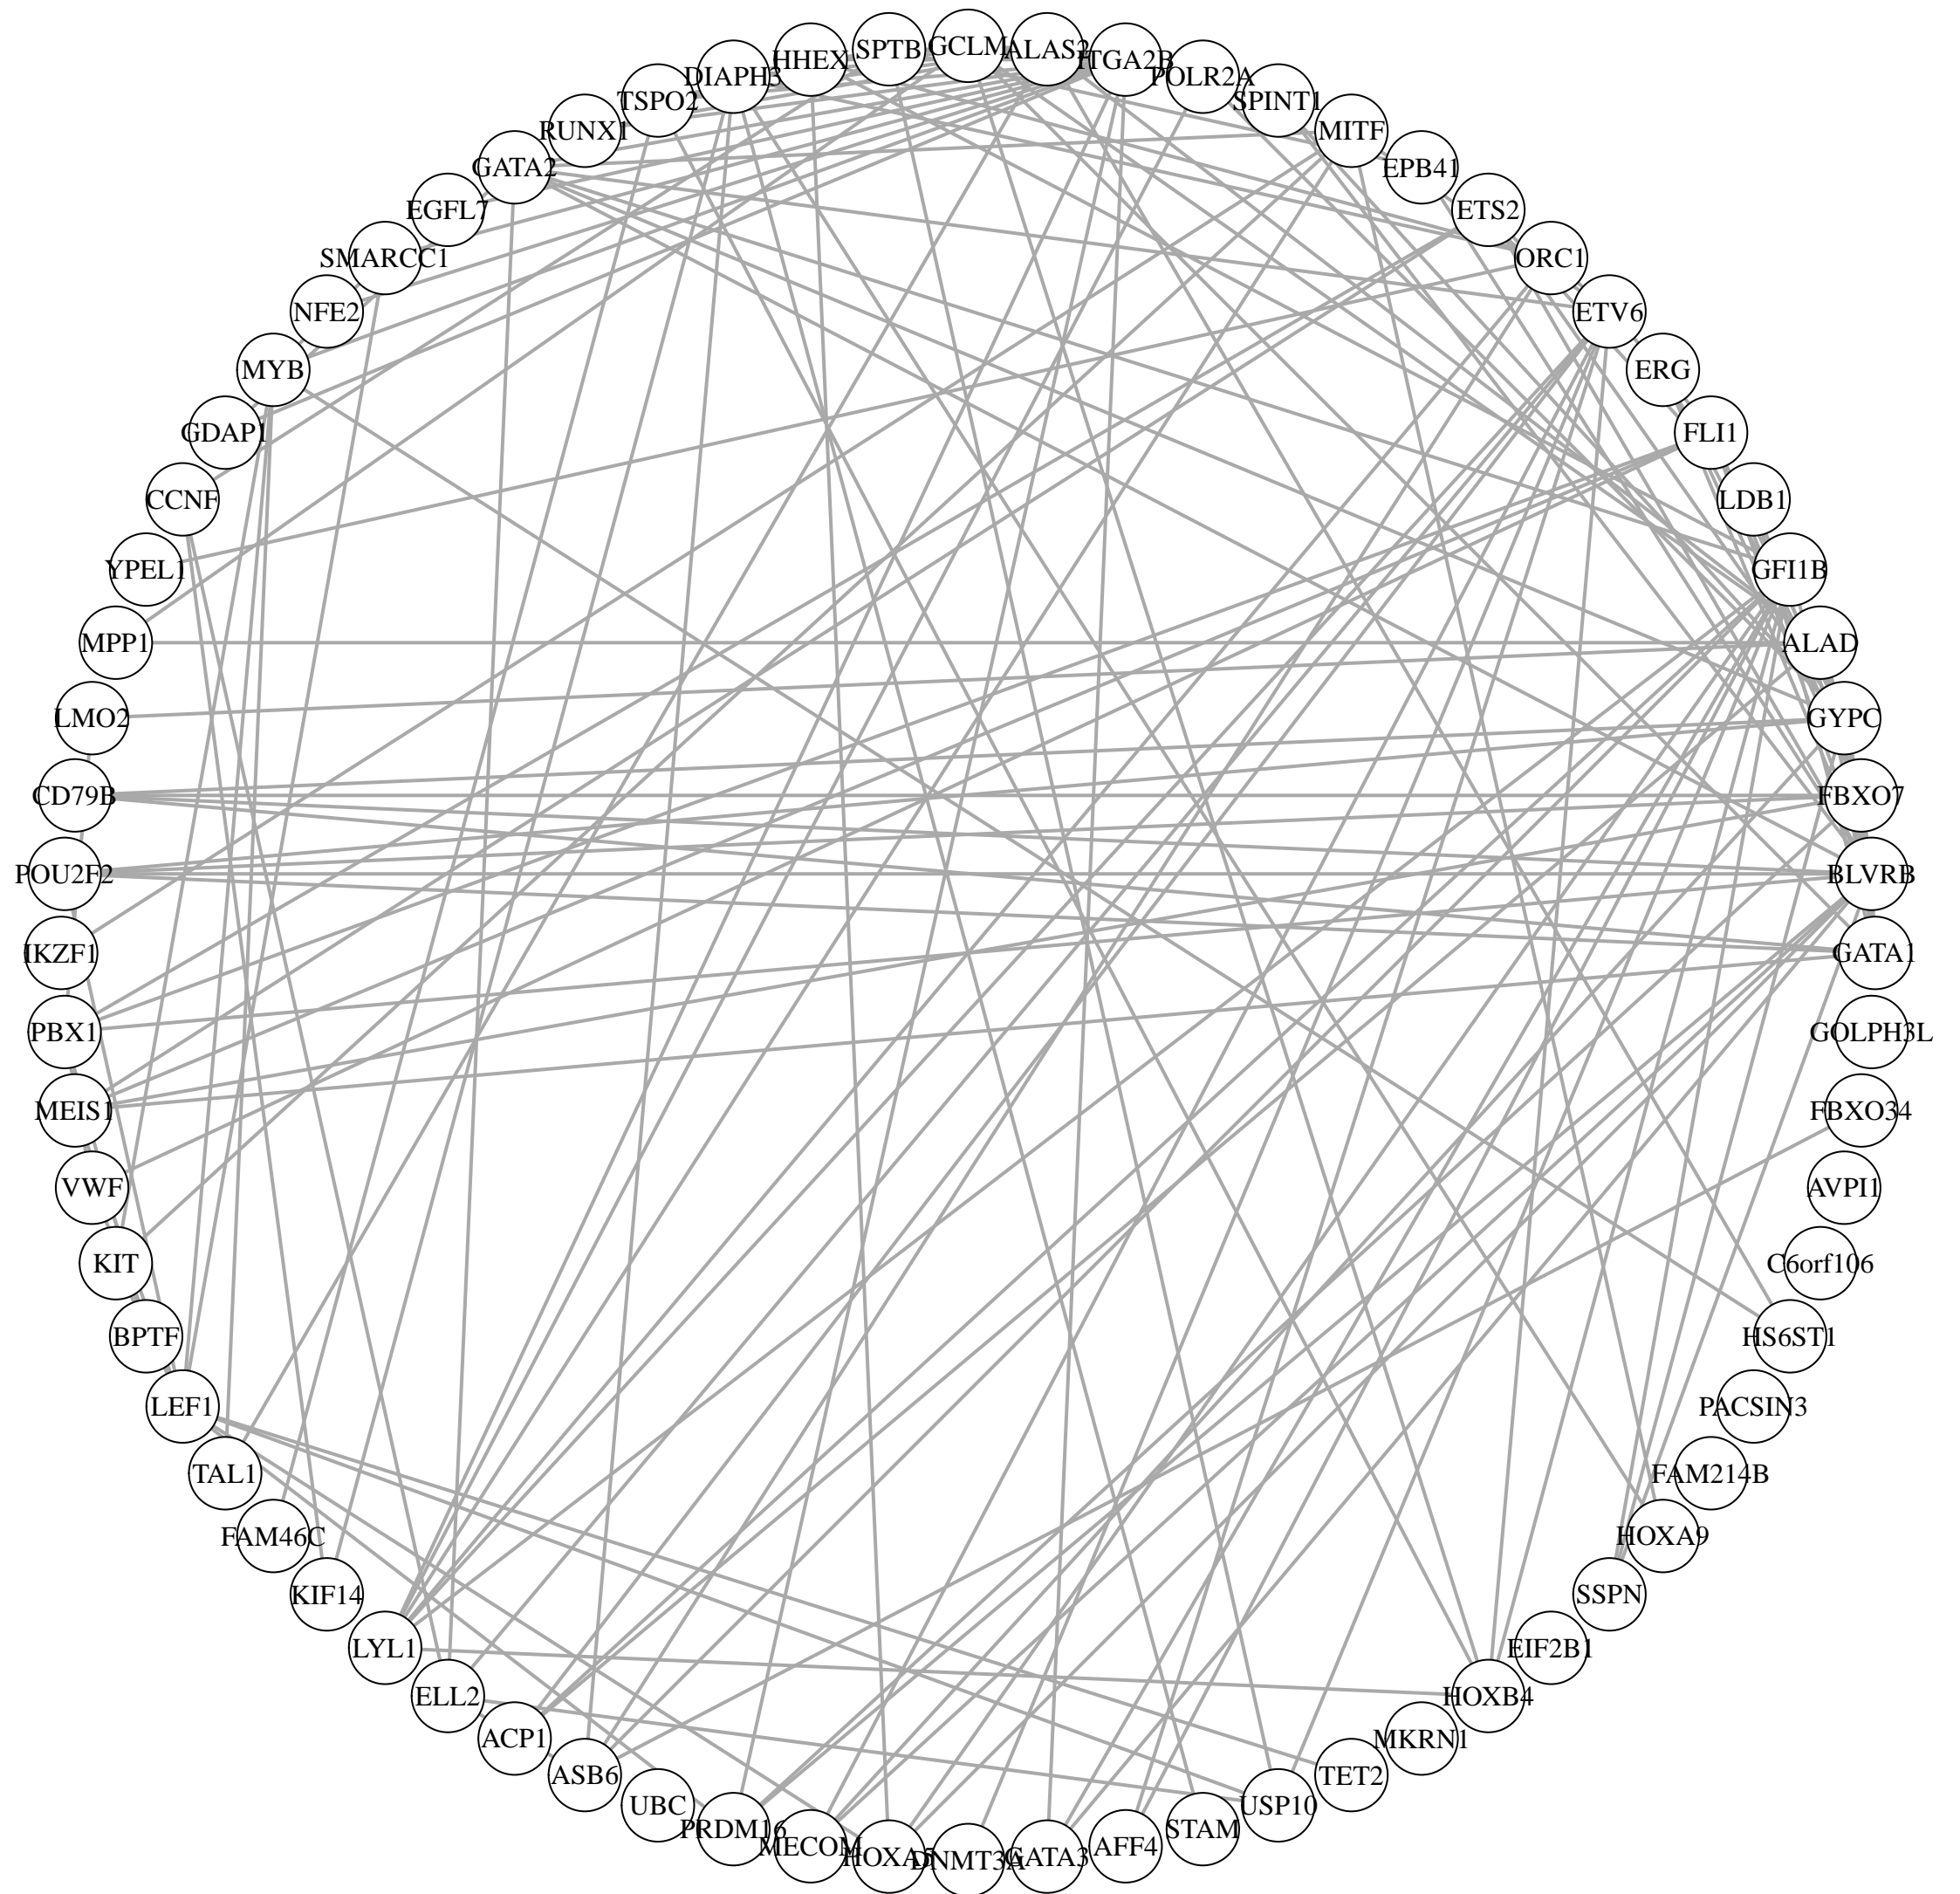

human\_HSCtoMEP\_time 22

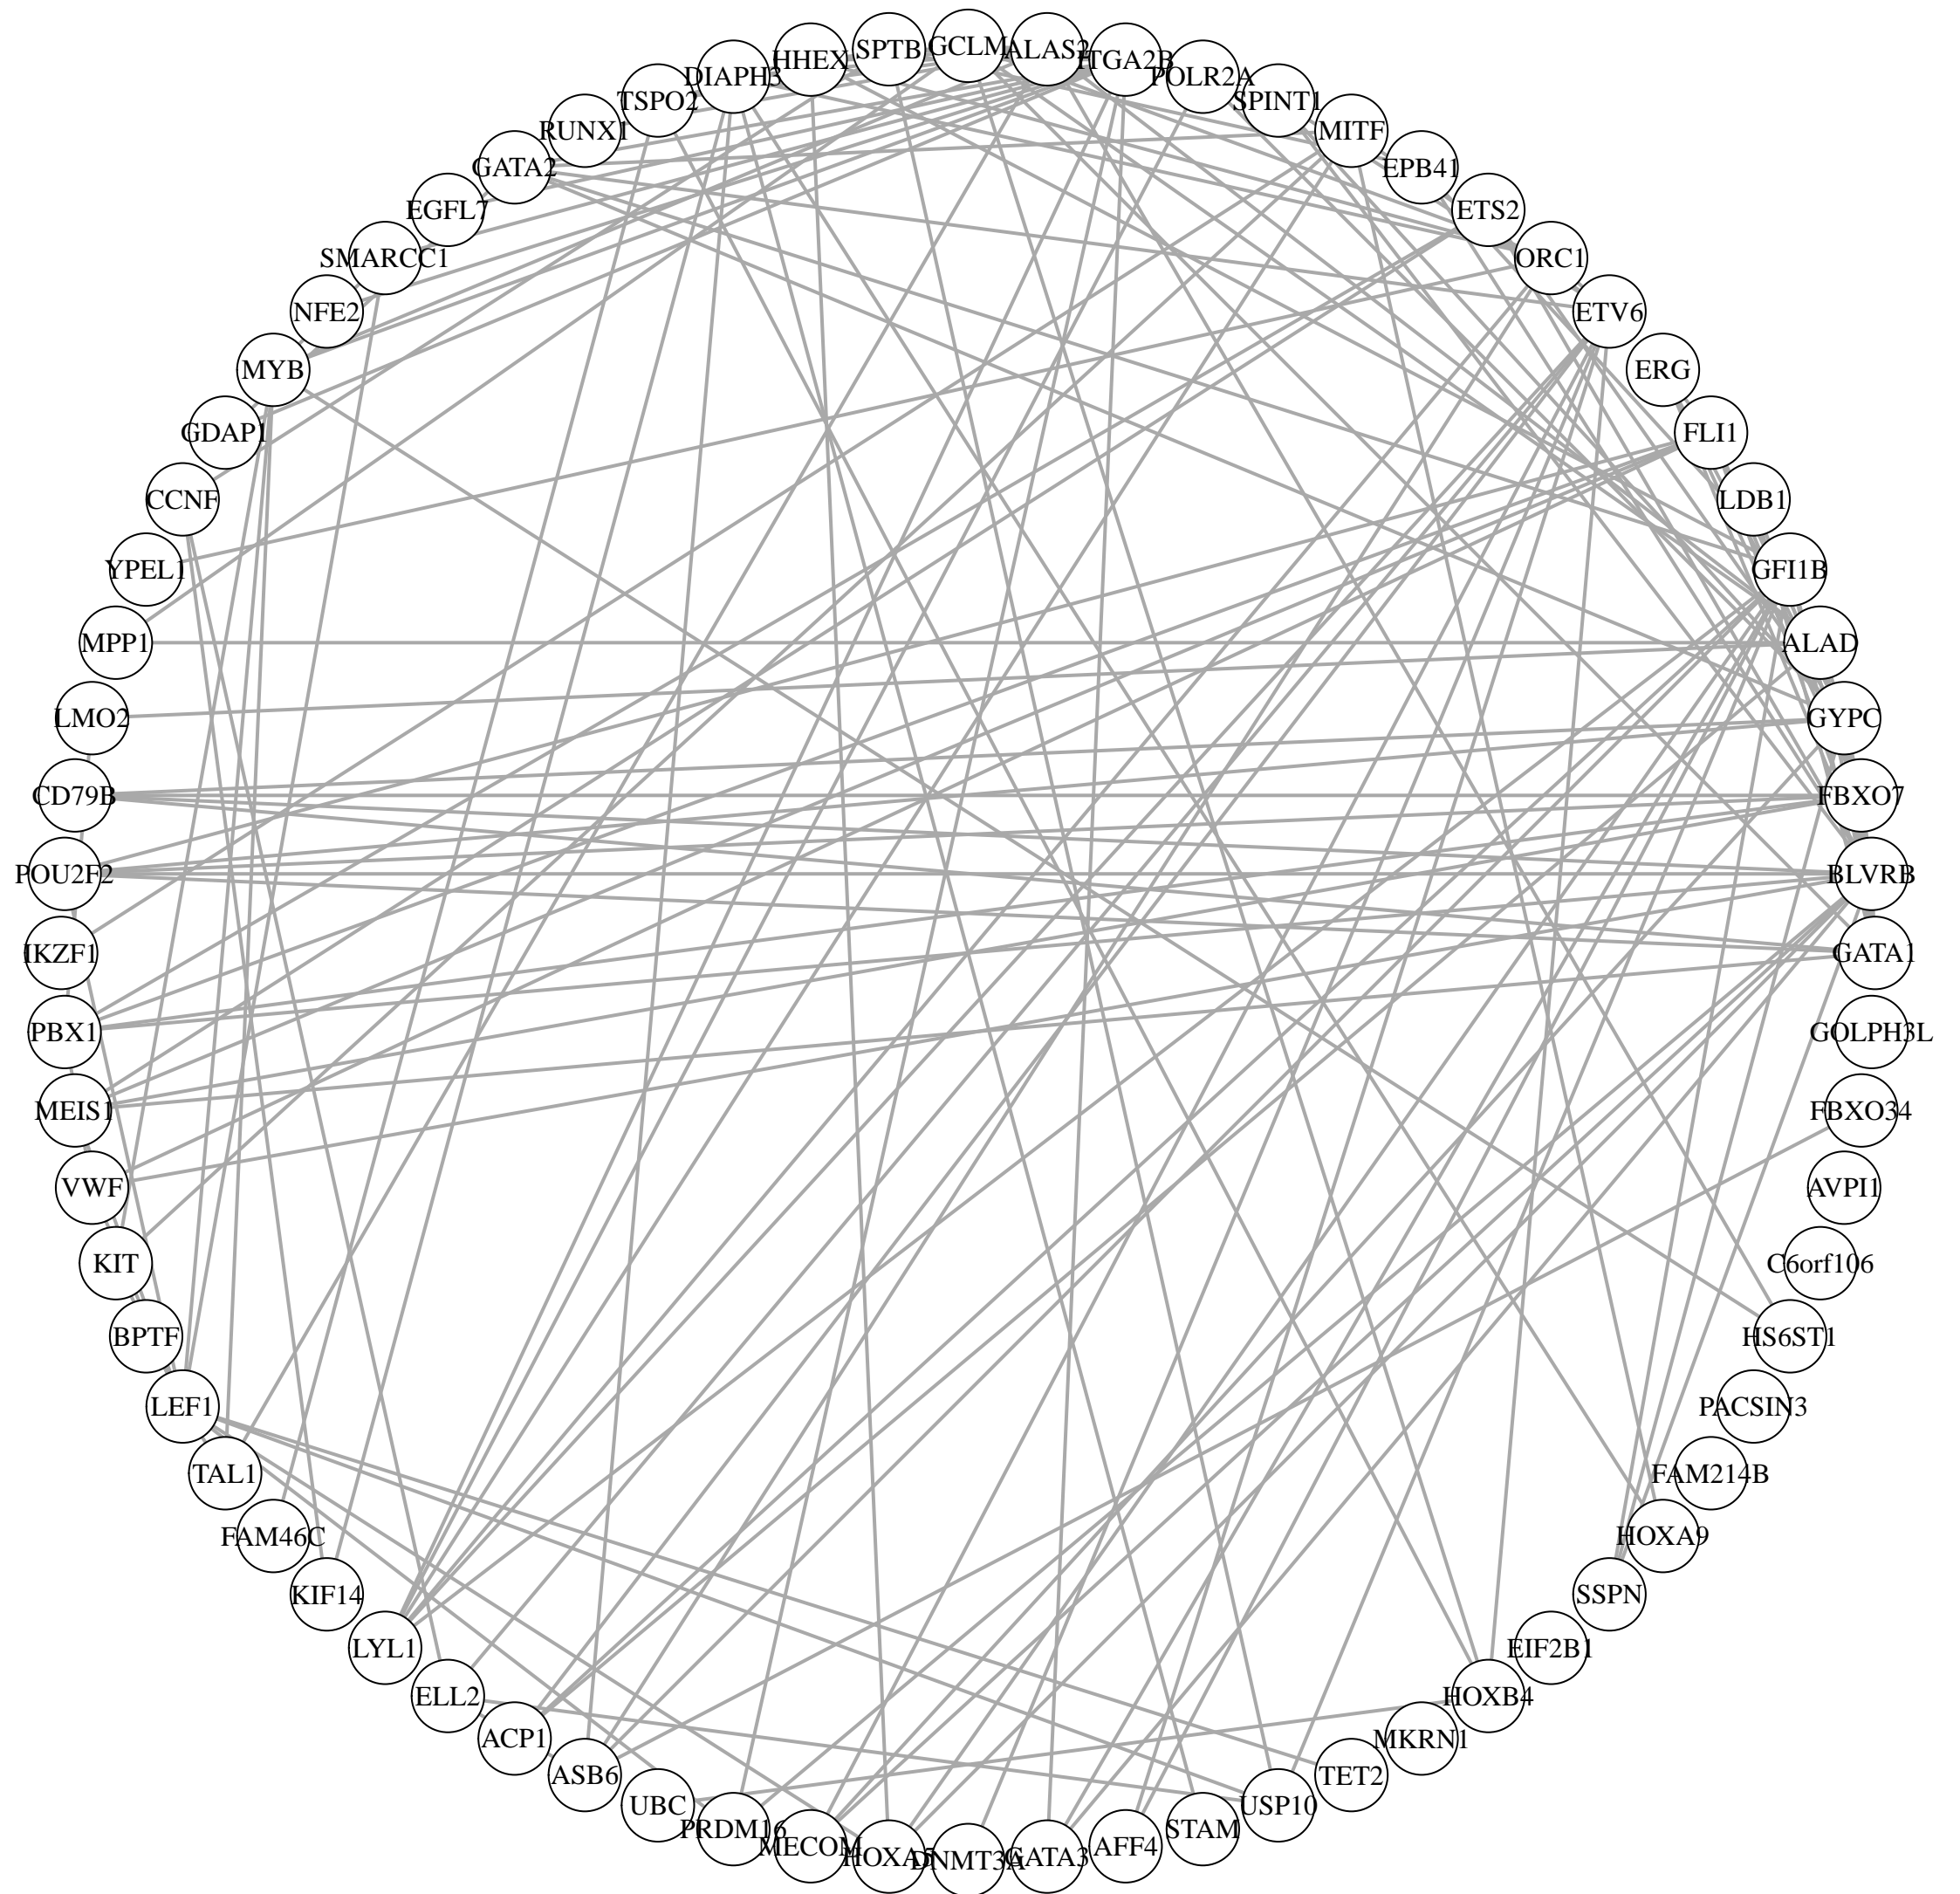

human\_HSCtoMEP\_time 23

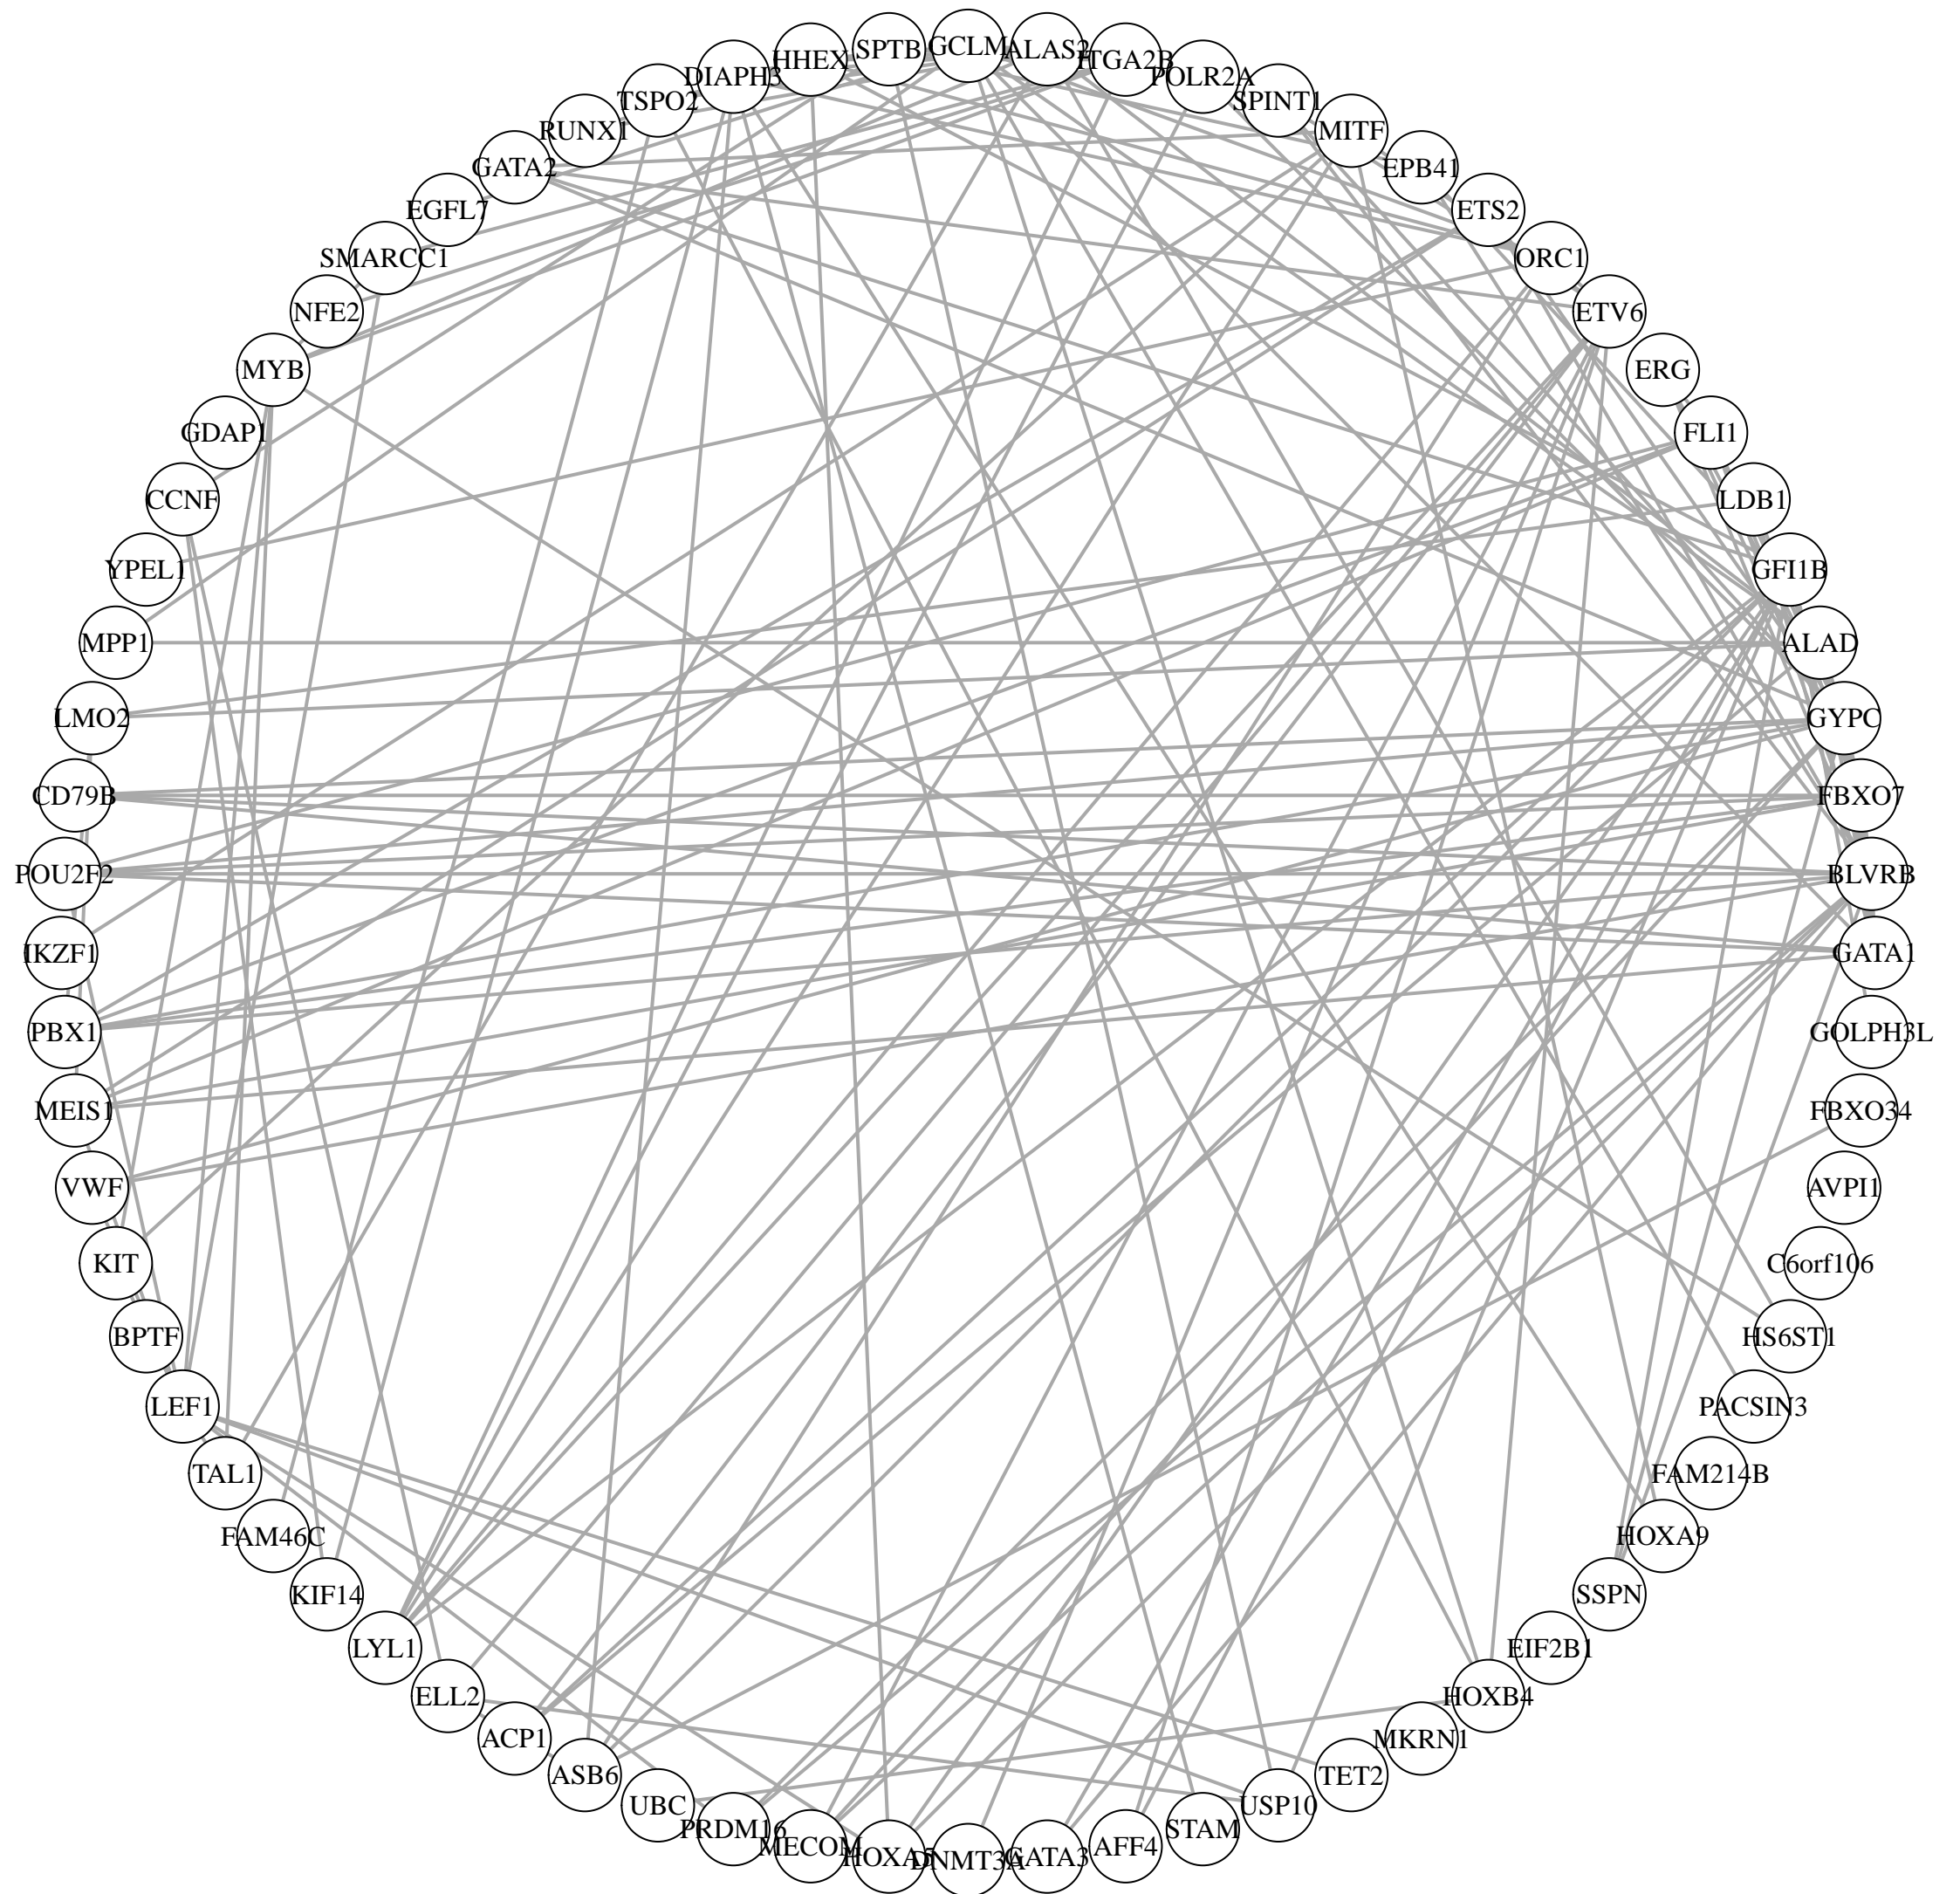

human\_HSCtoMEP\_time 24

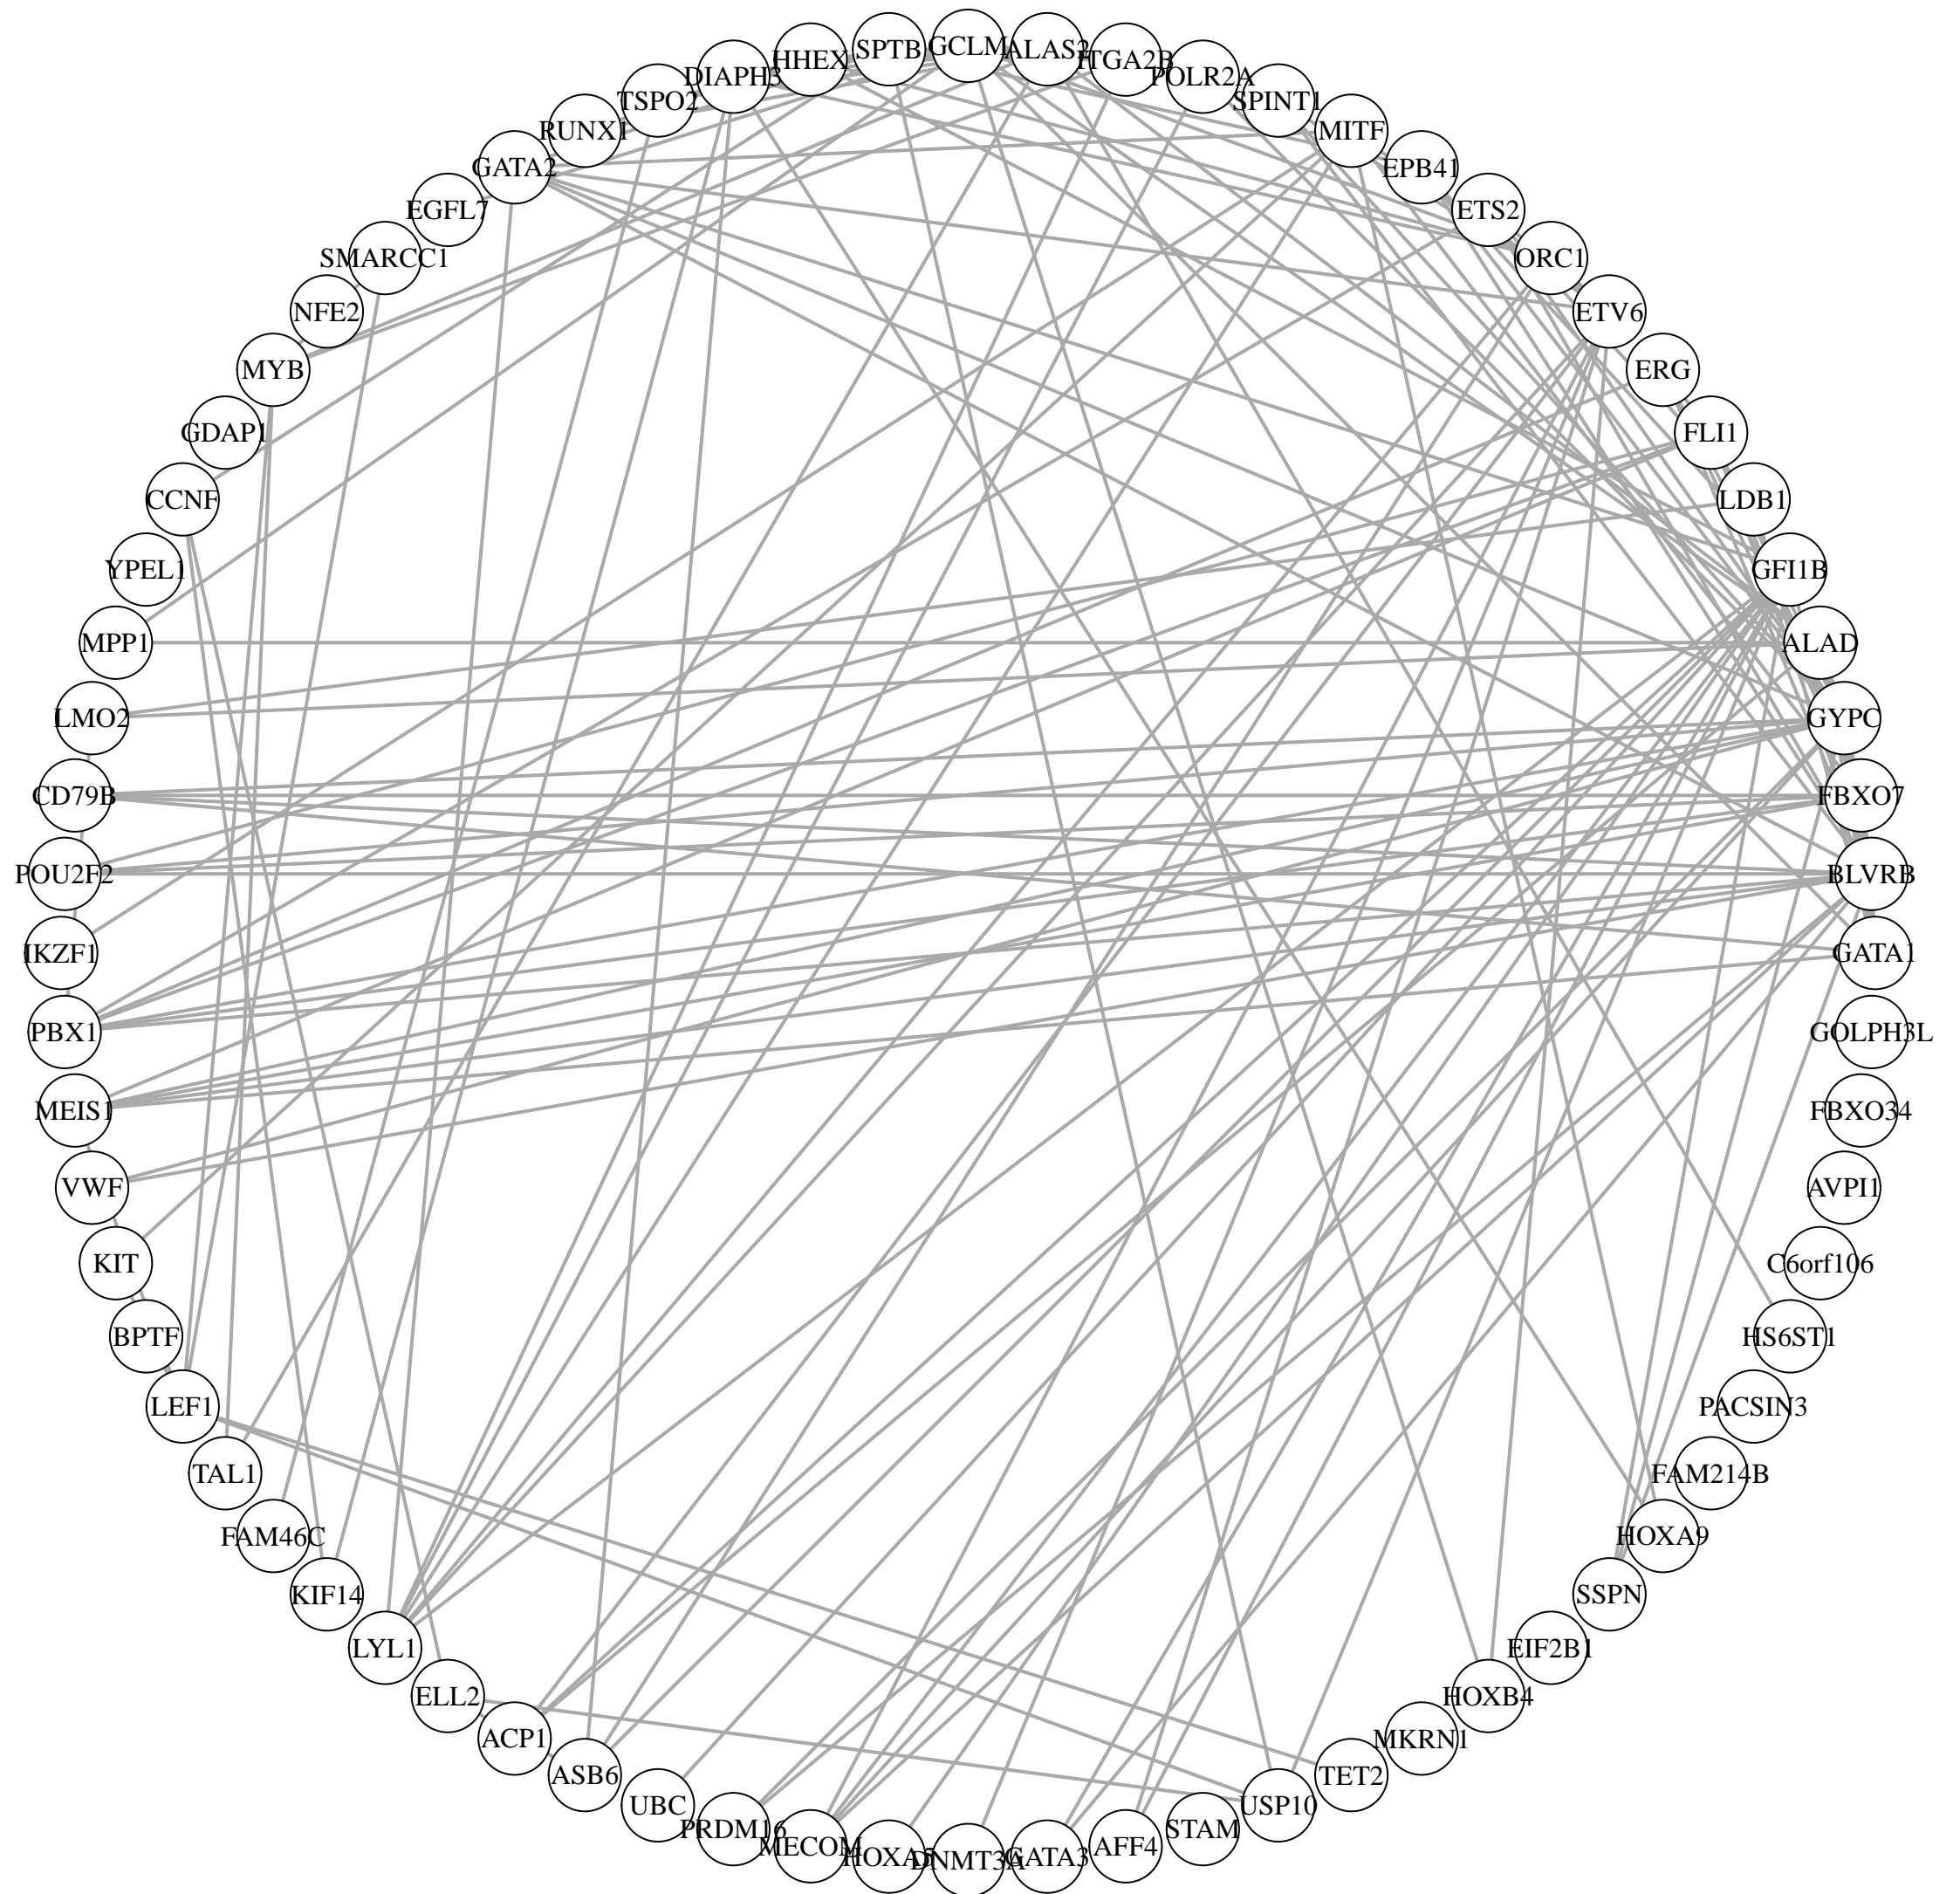

human\_HSCtoMEP\_time 25

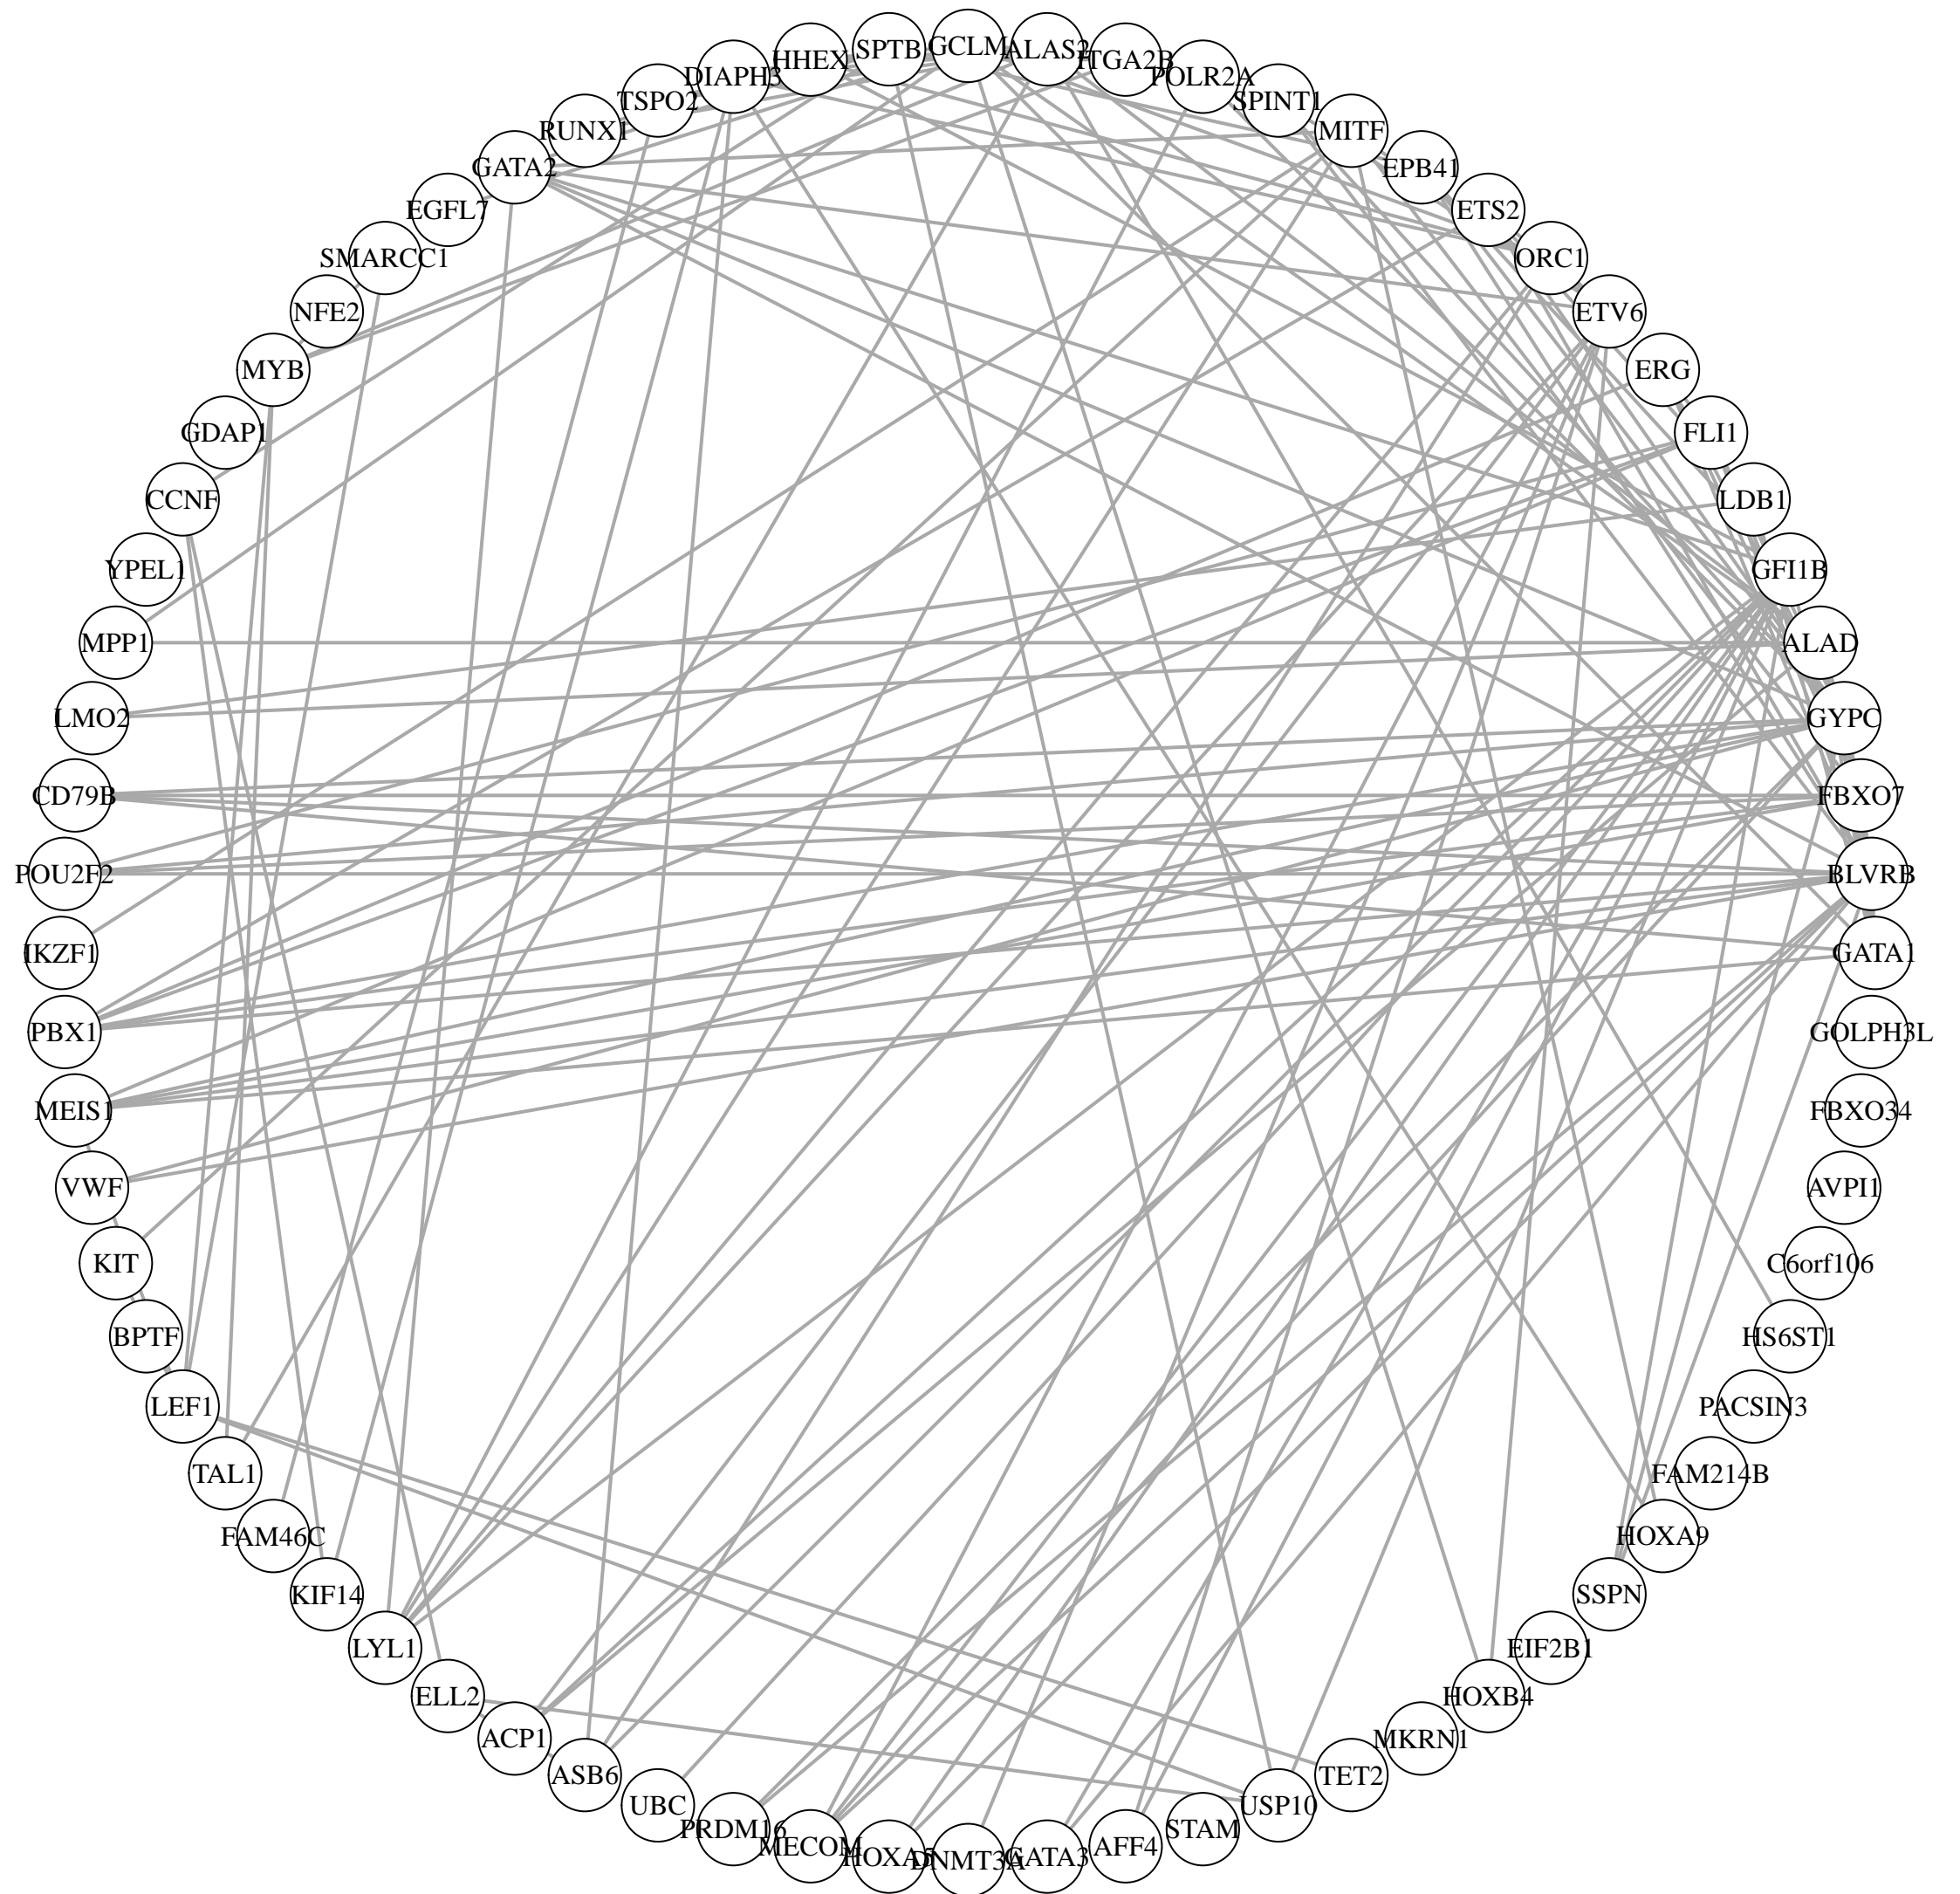



human\_HSCtoGMP\_time 1

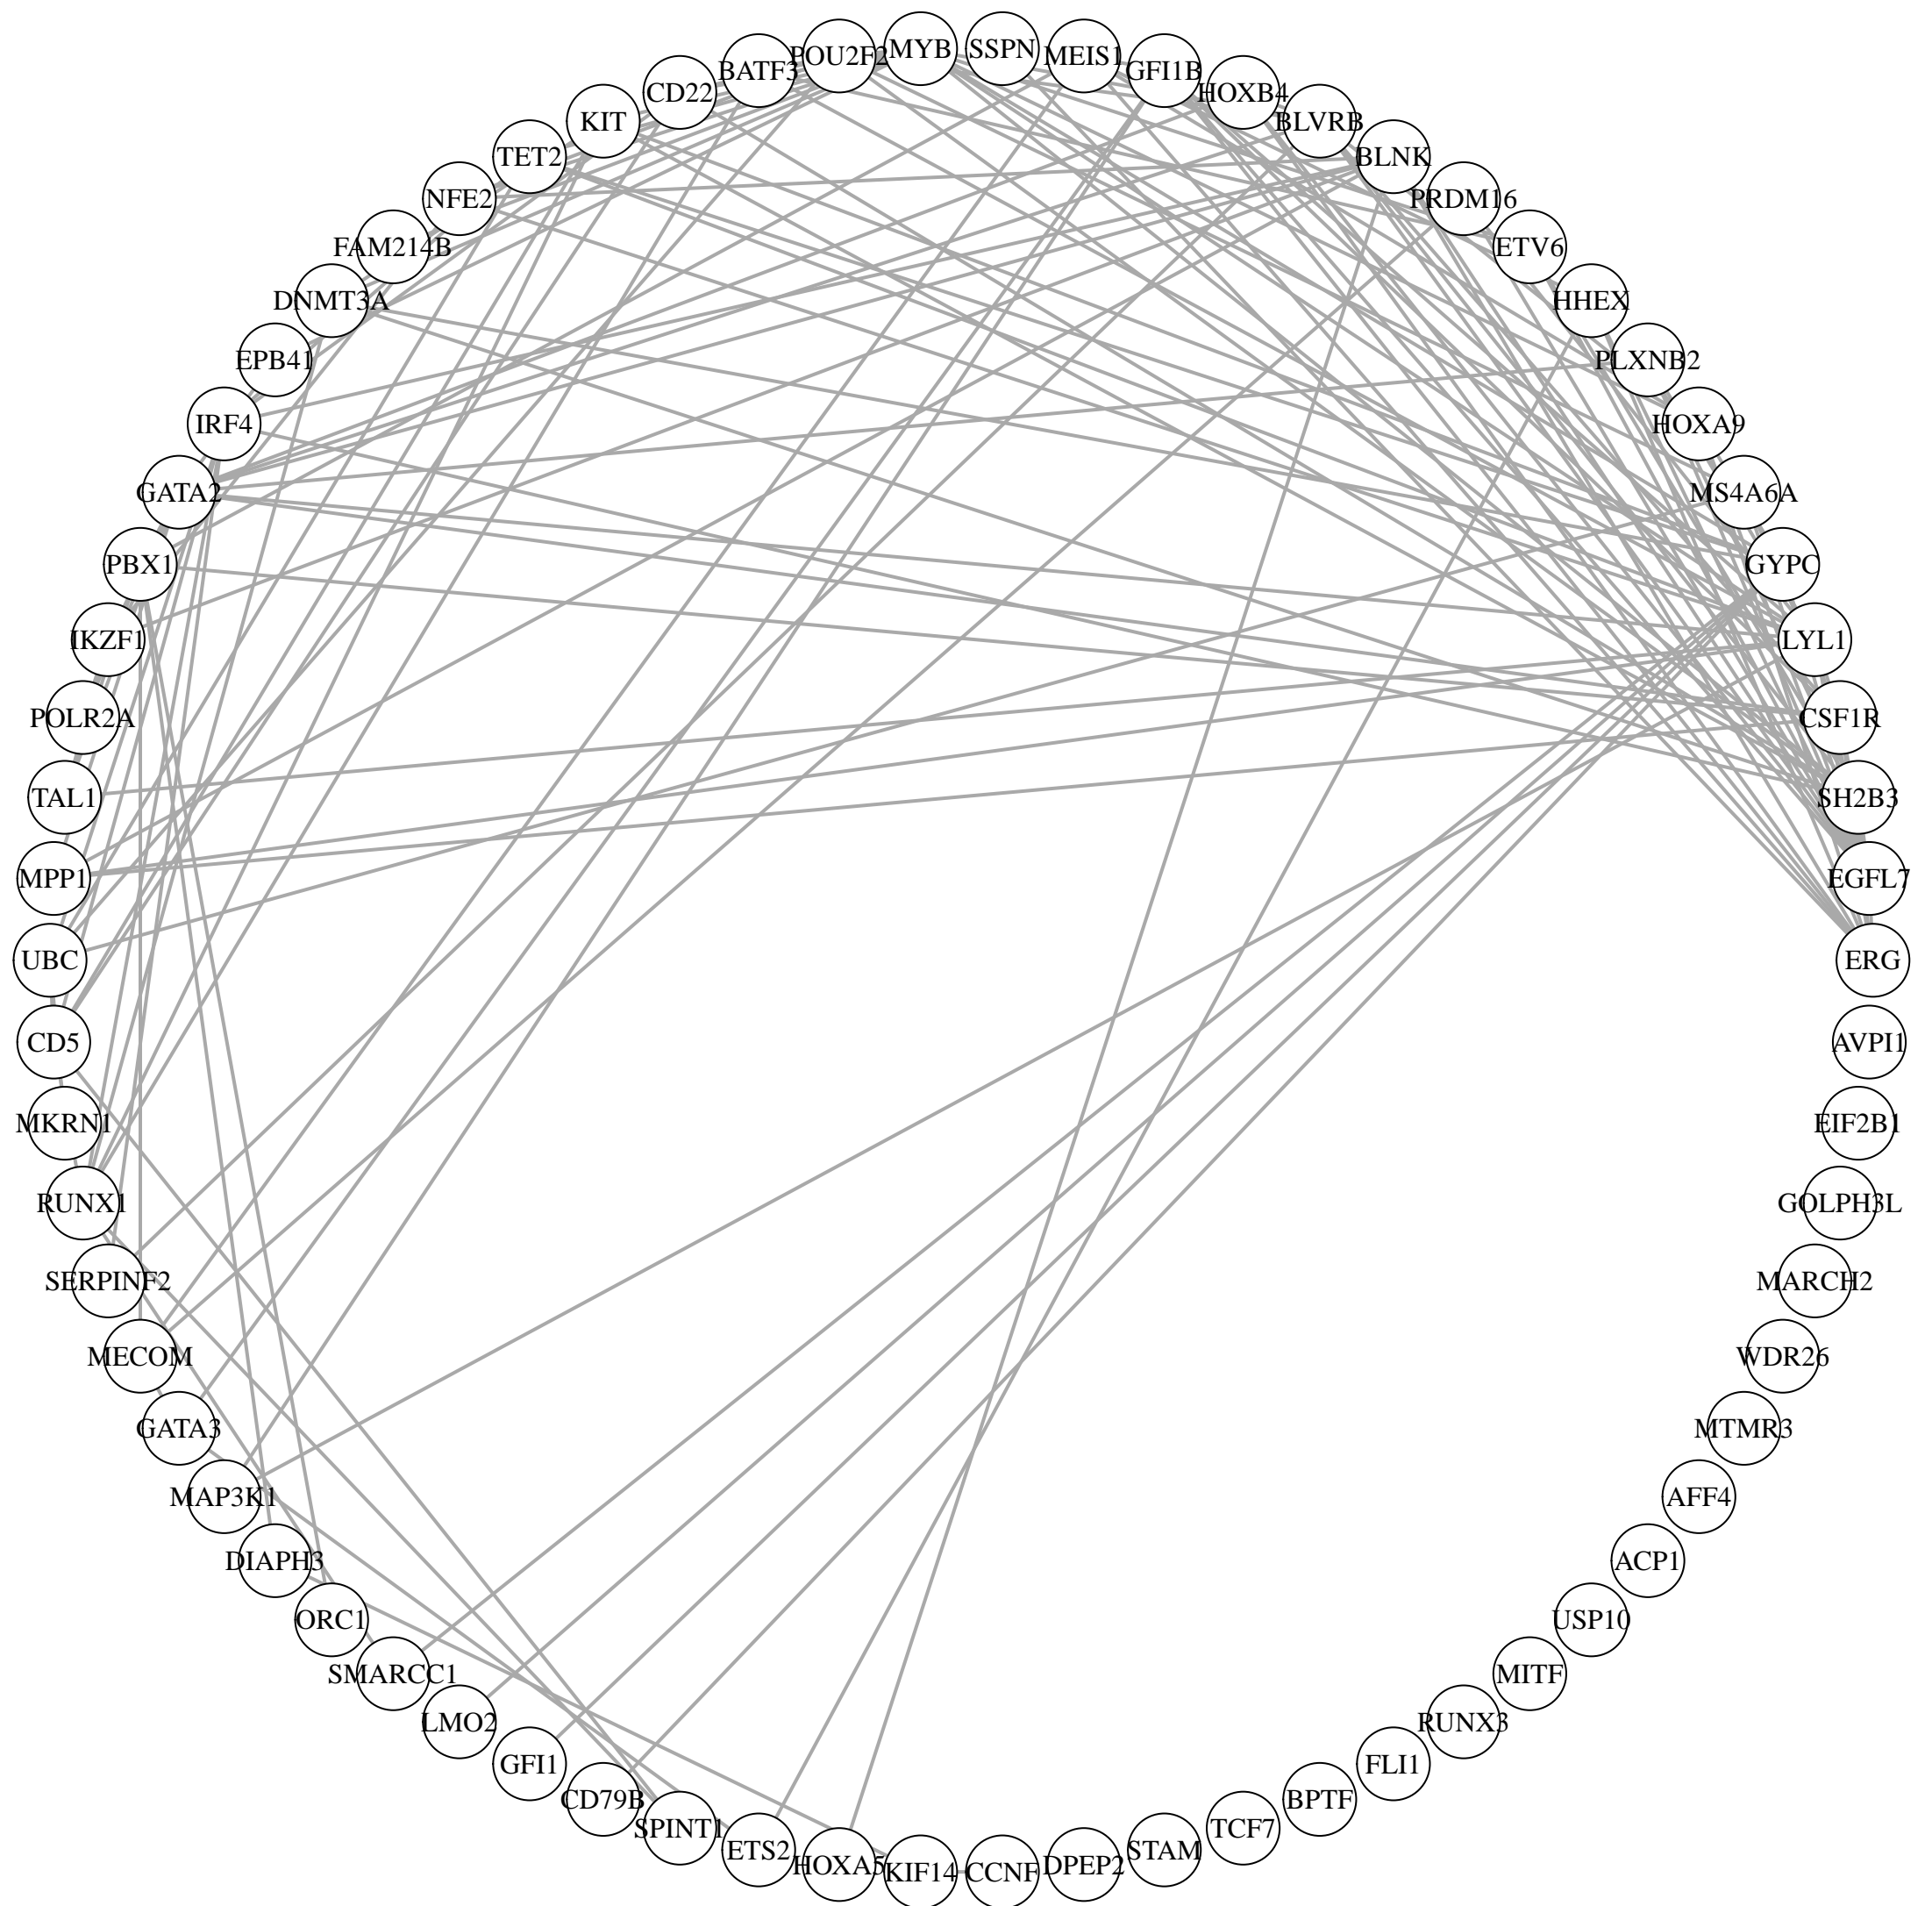

human\_HSCtoGMP\_time 2

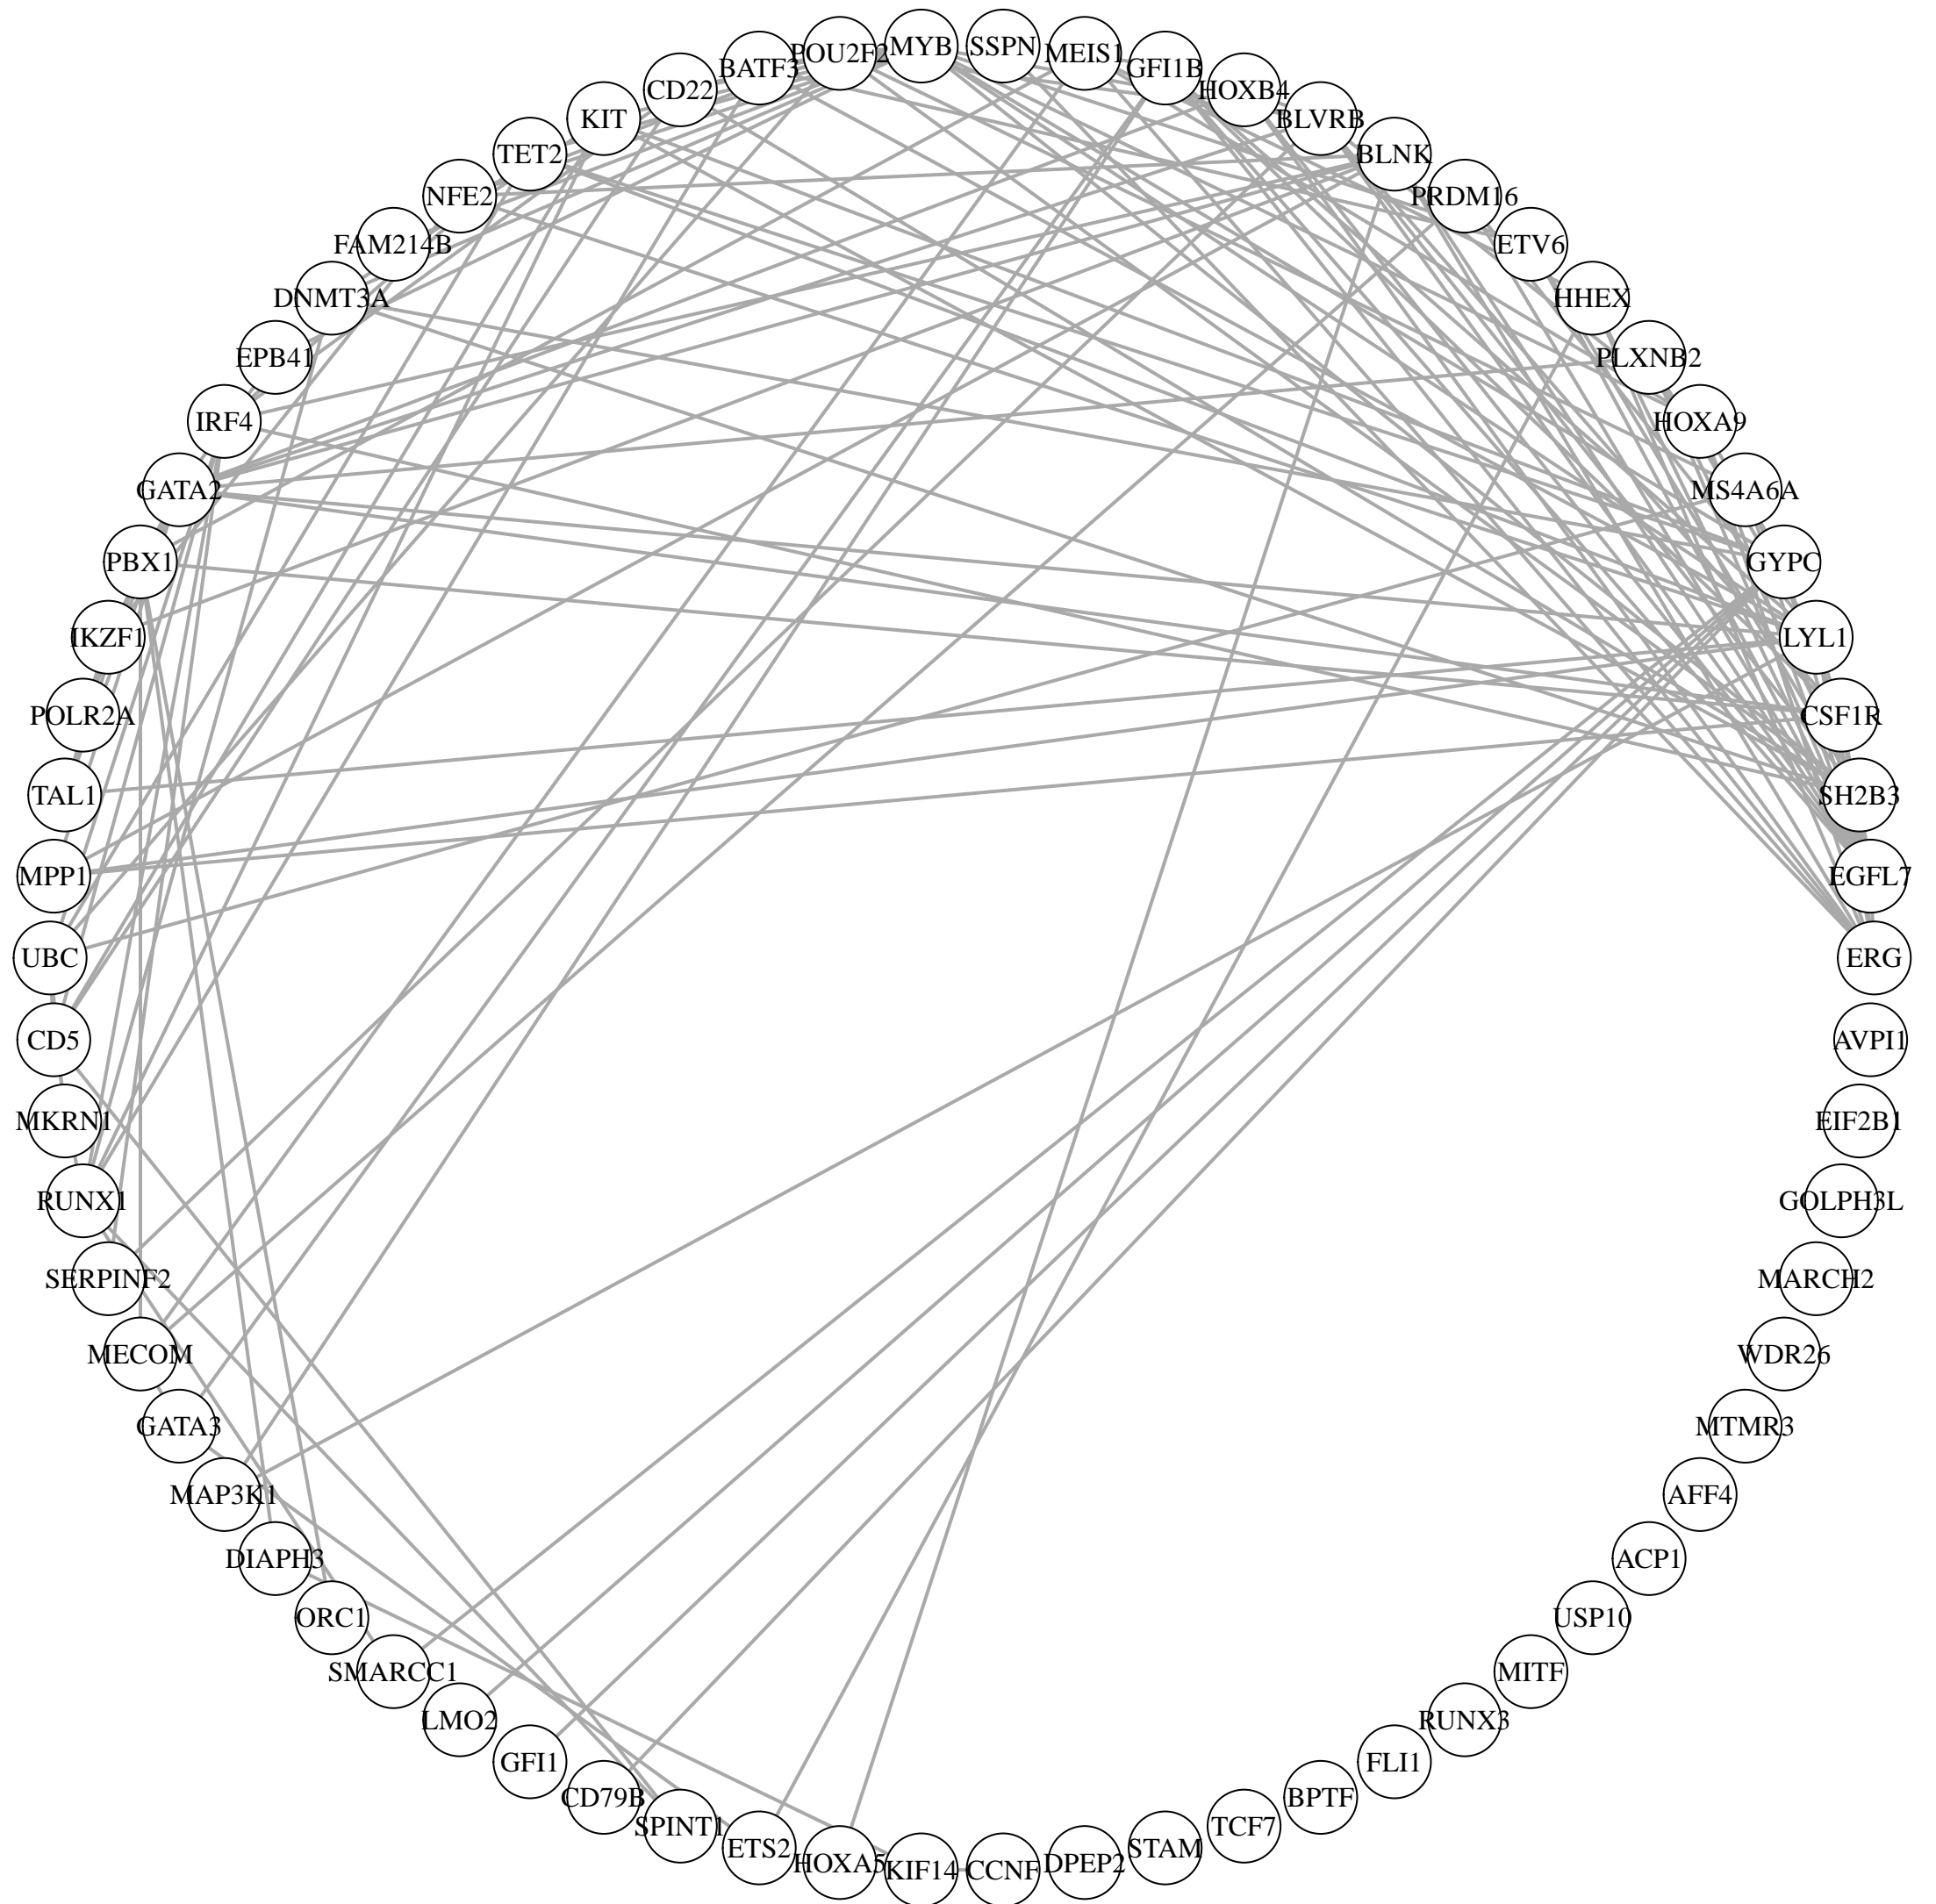

human\_HSCtoGMP\_time 3



human\_HSCtoGMP\_time 4

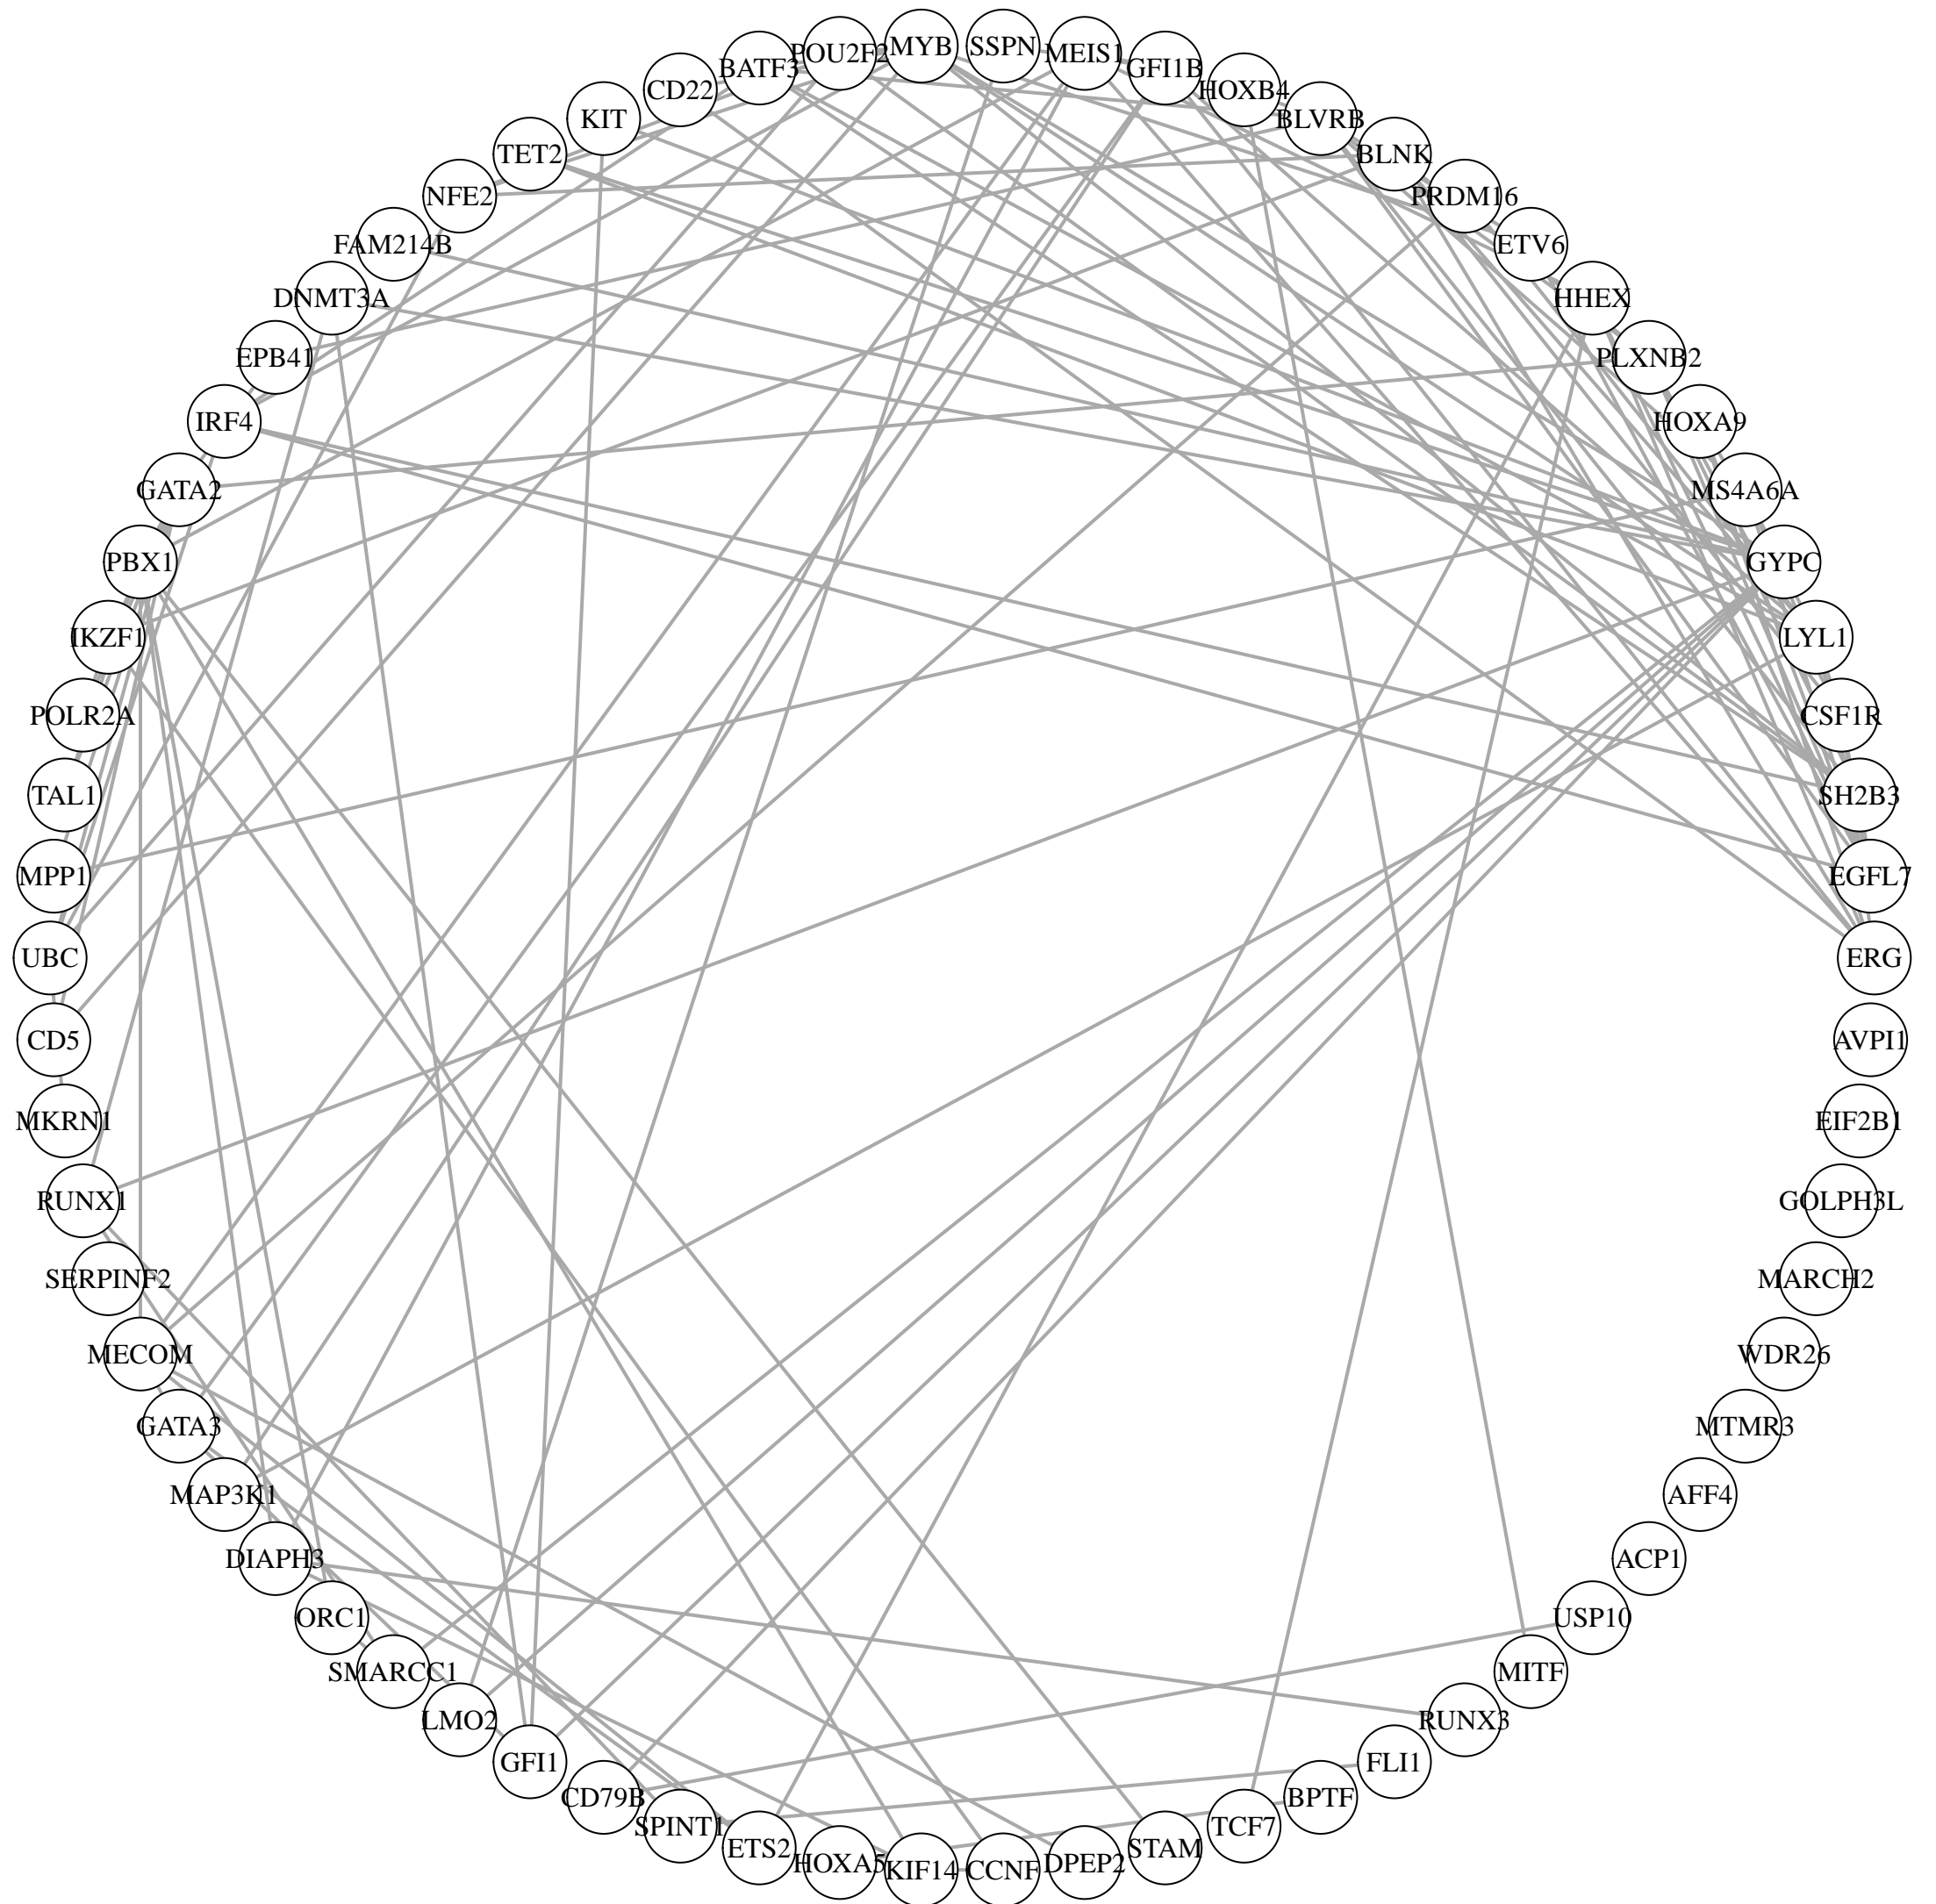

human\_HSCtoGMP\_time 5

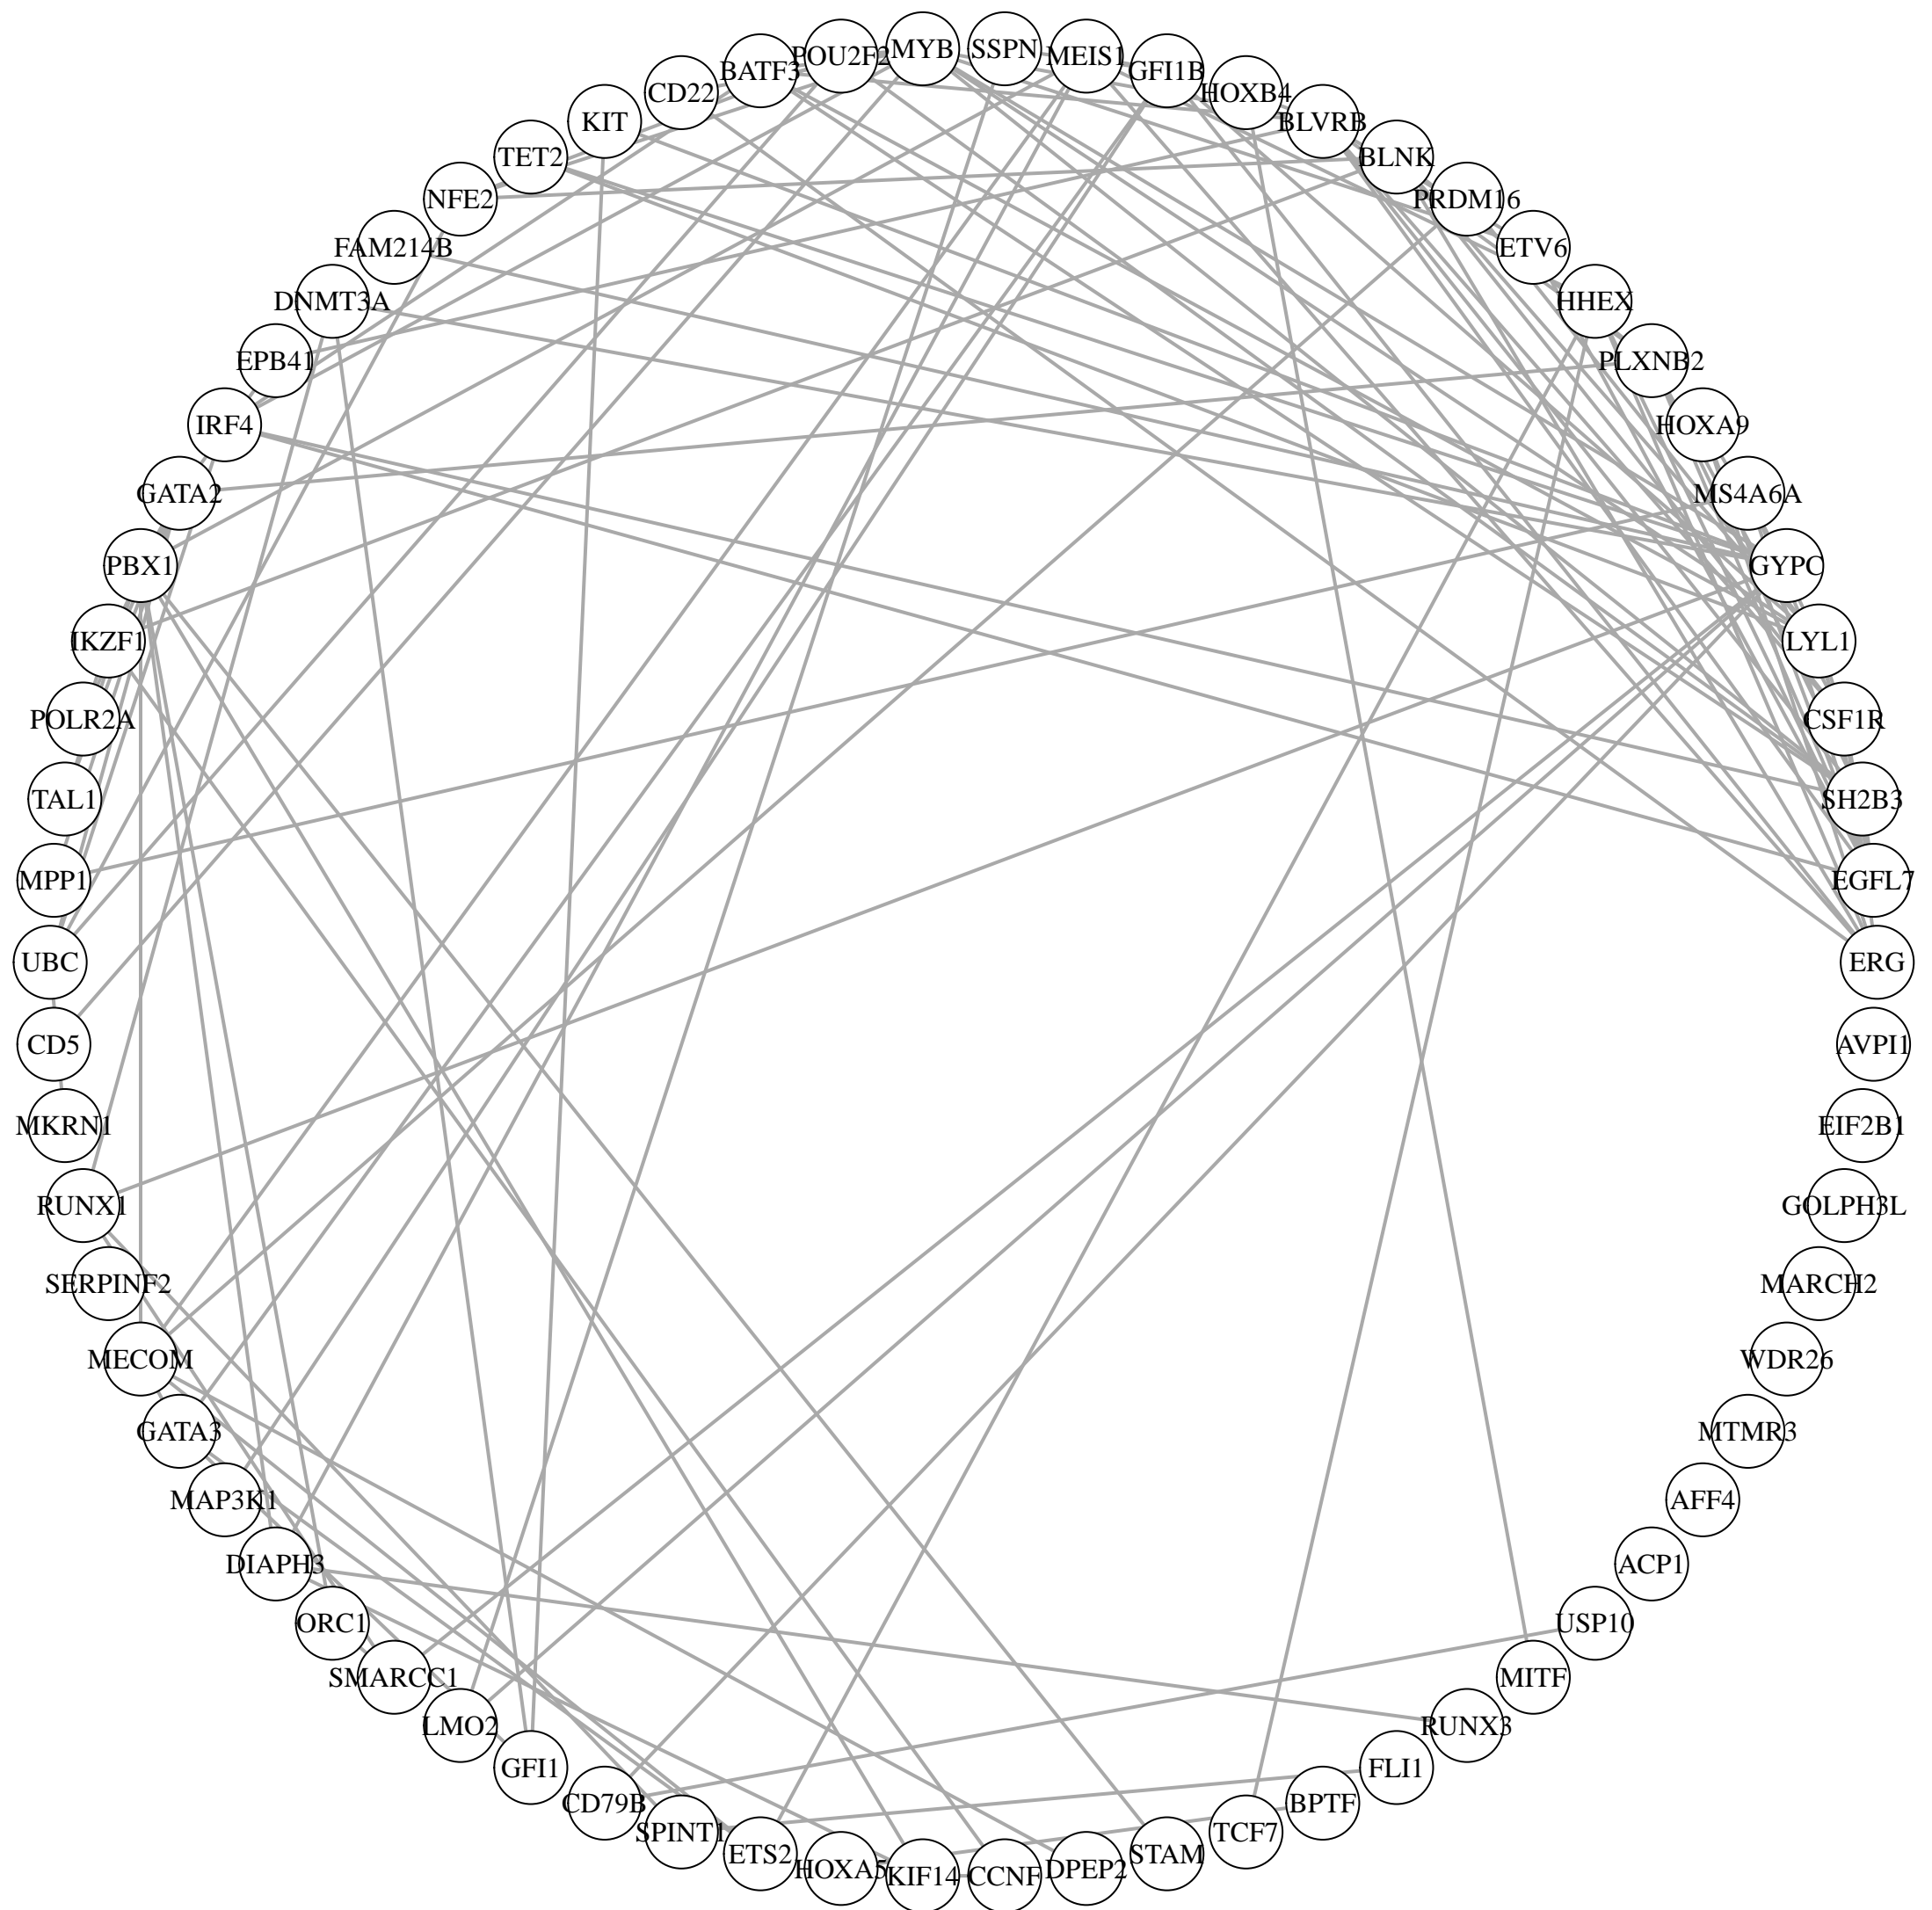



human\_HSCtoGMP\_time 6

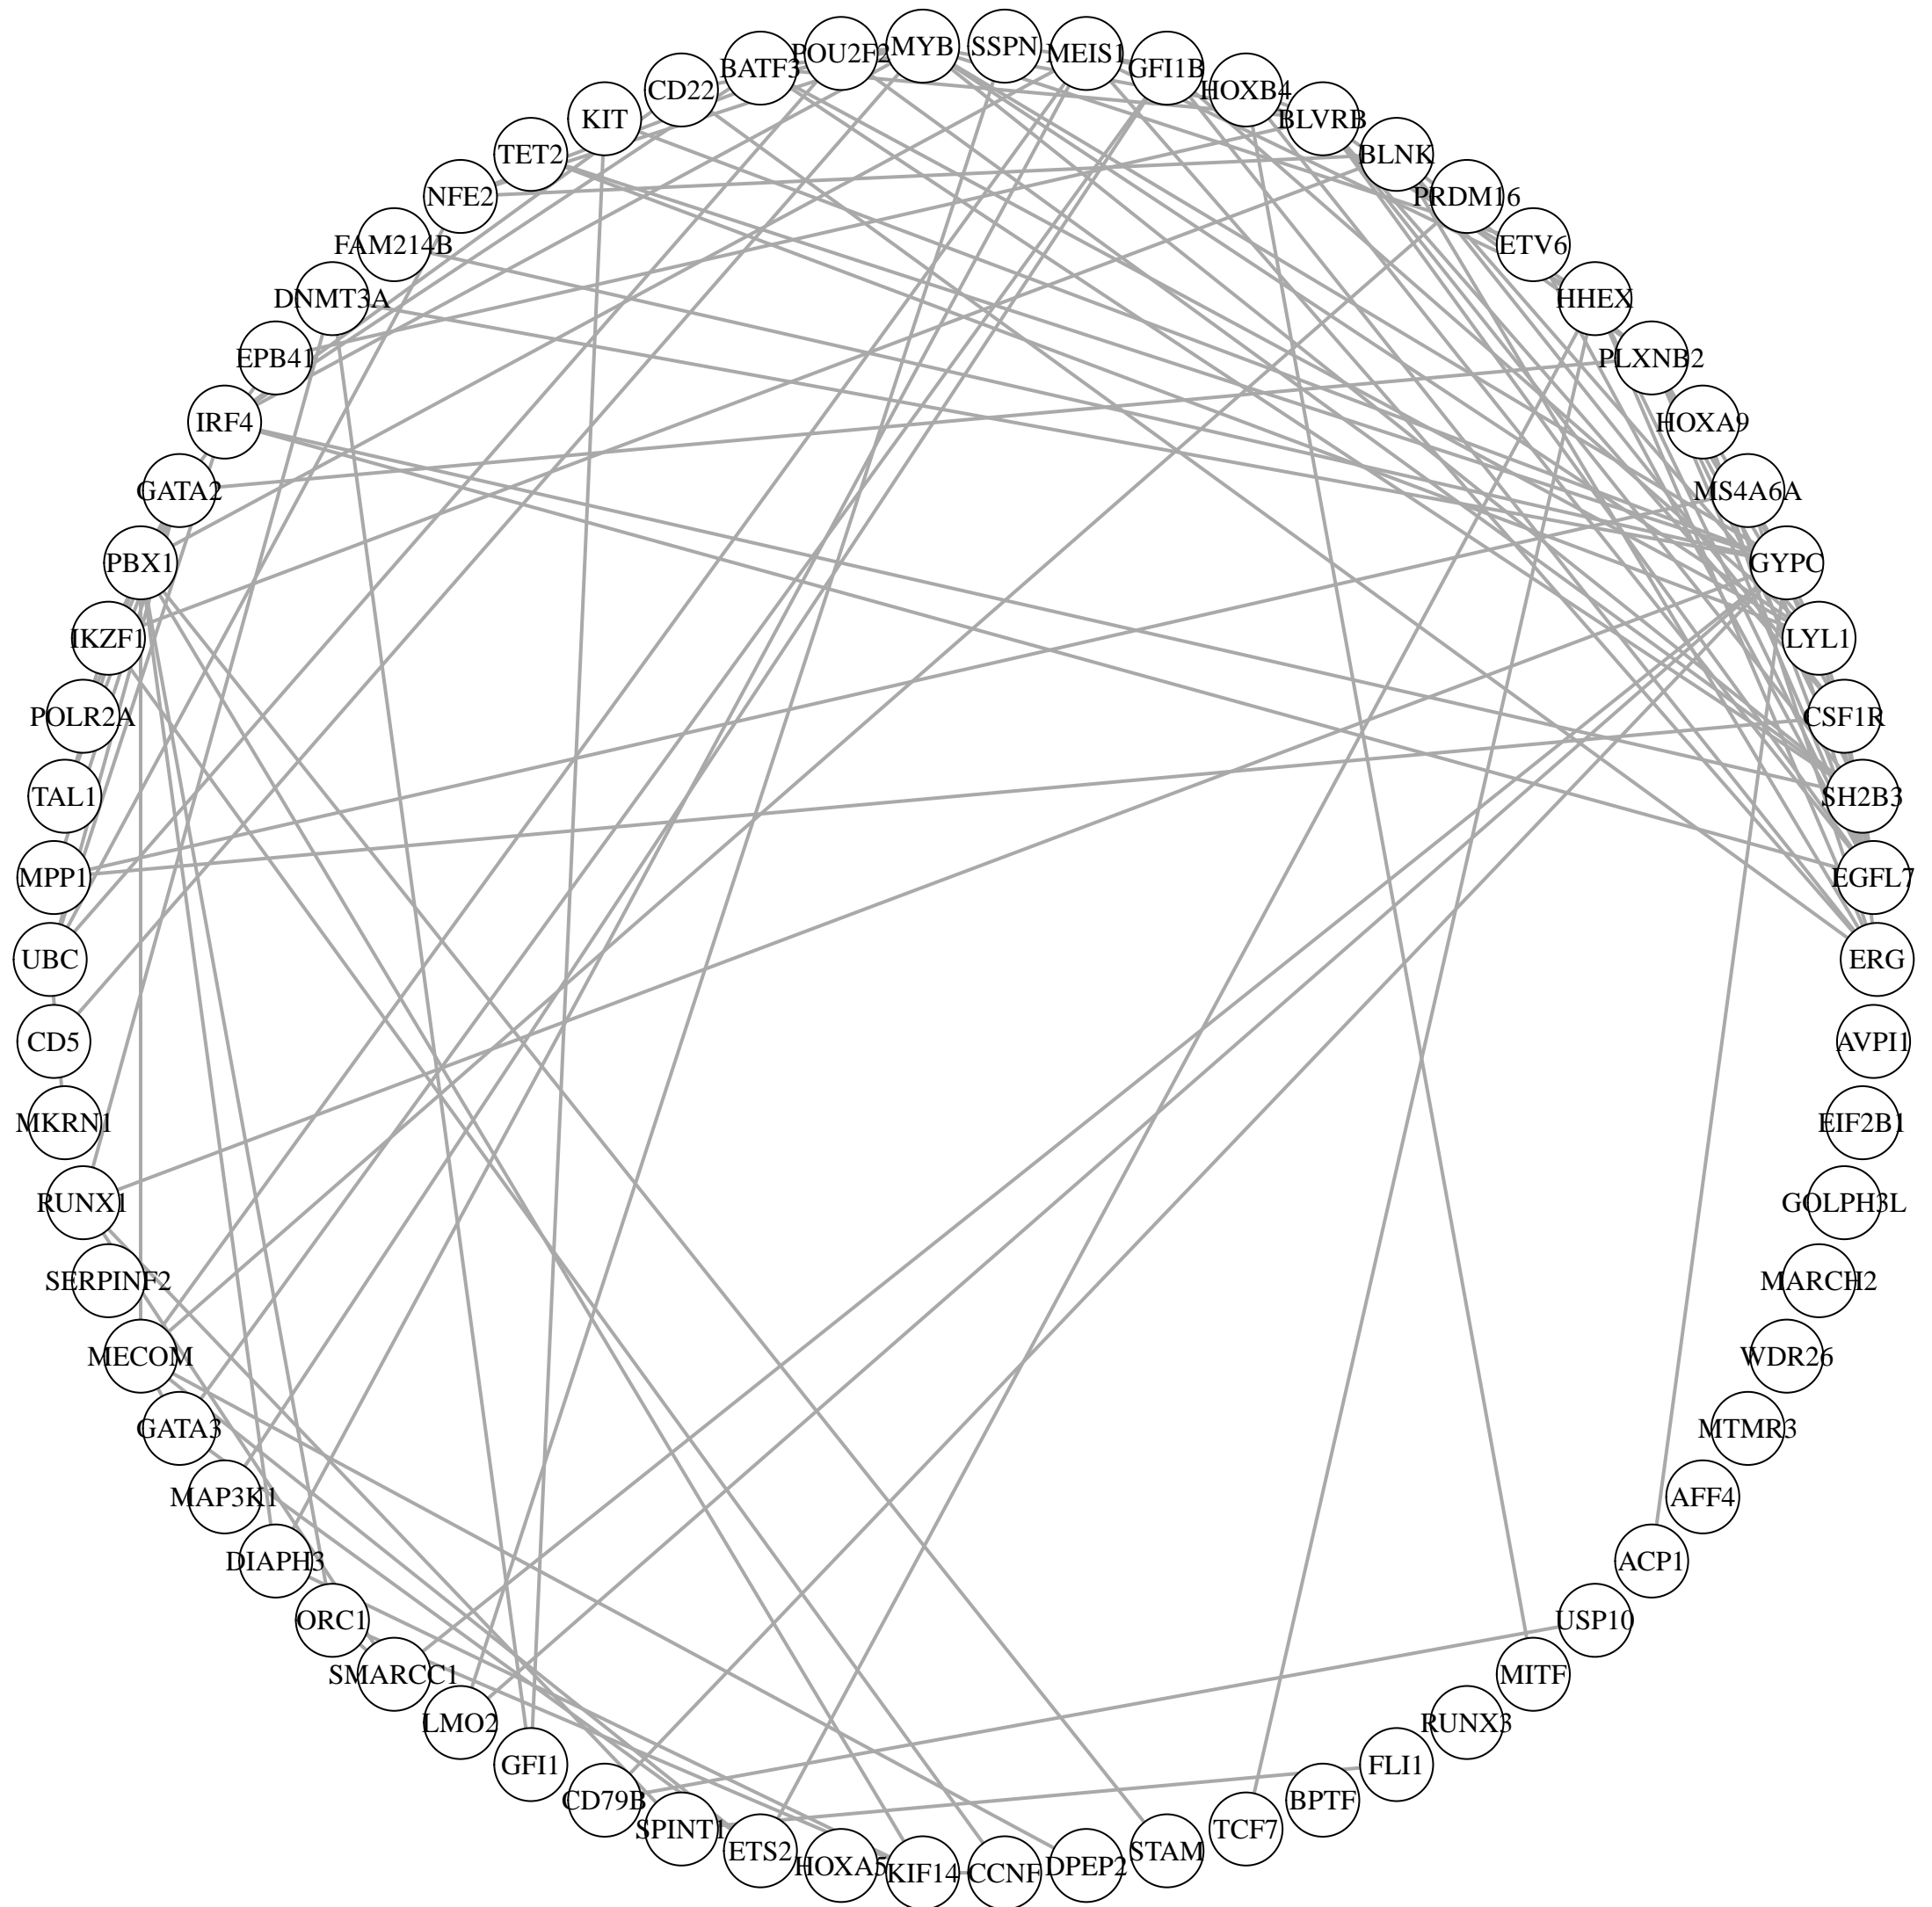

human\_HSCtoGMP\_time 7

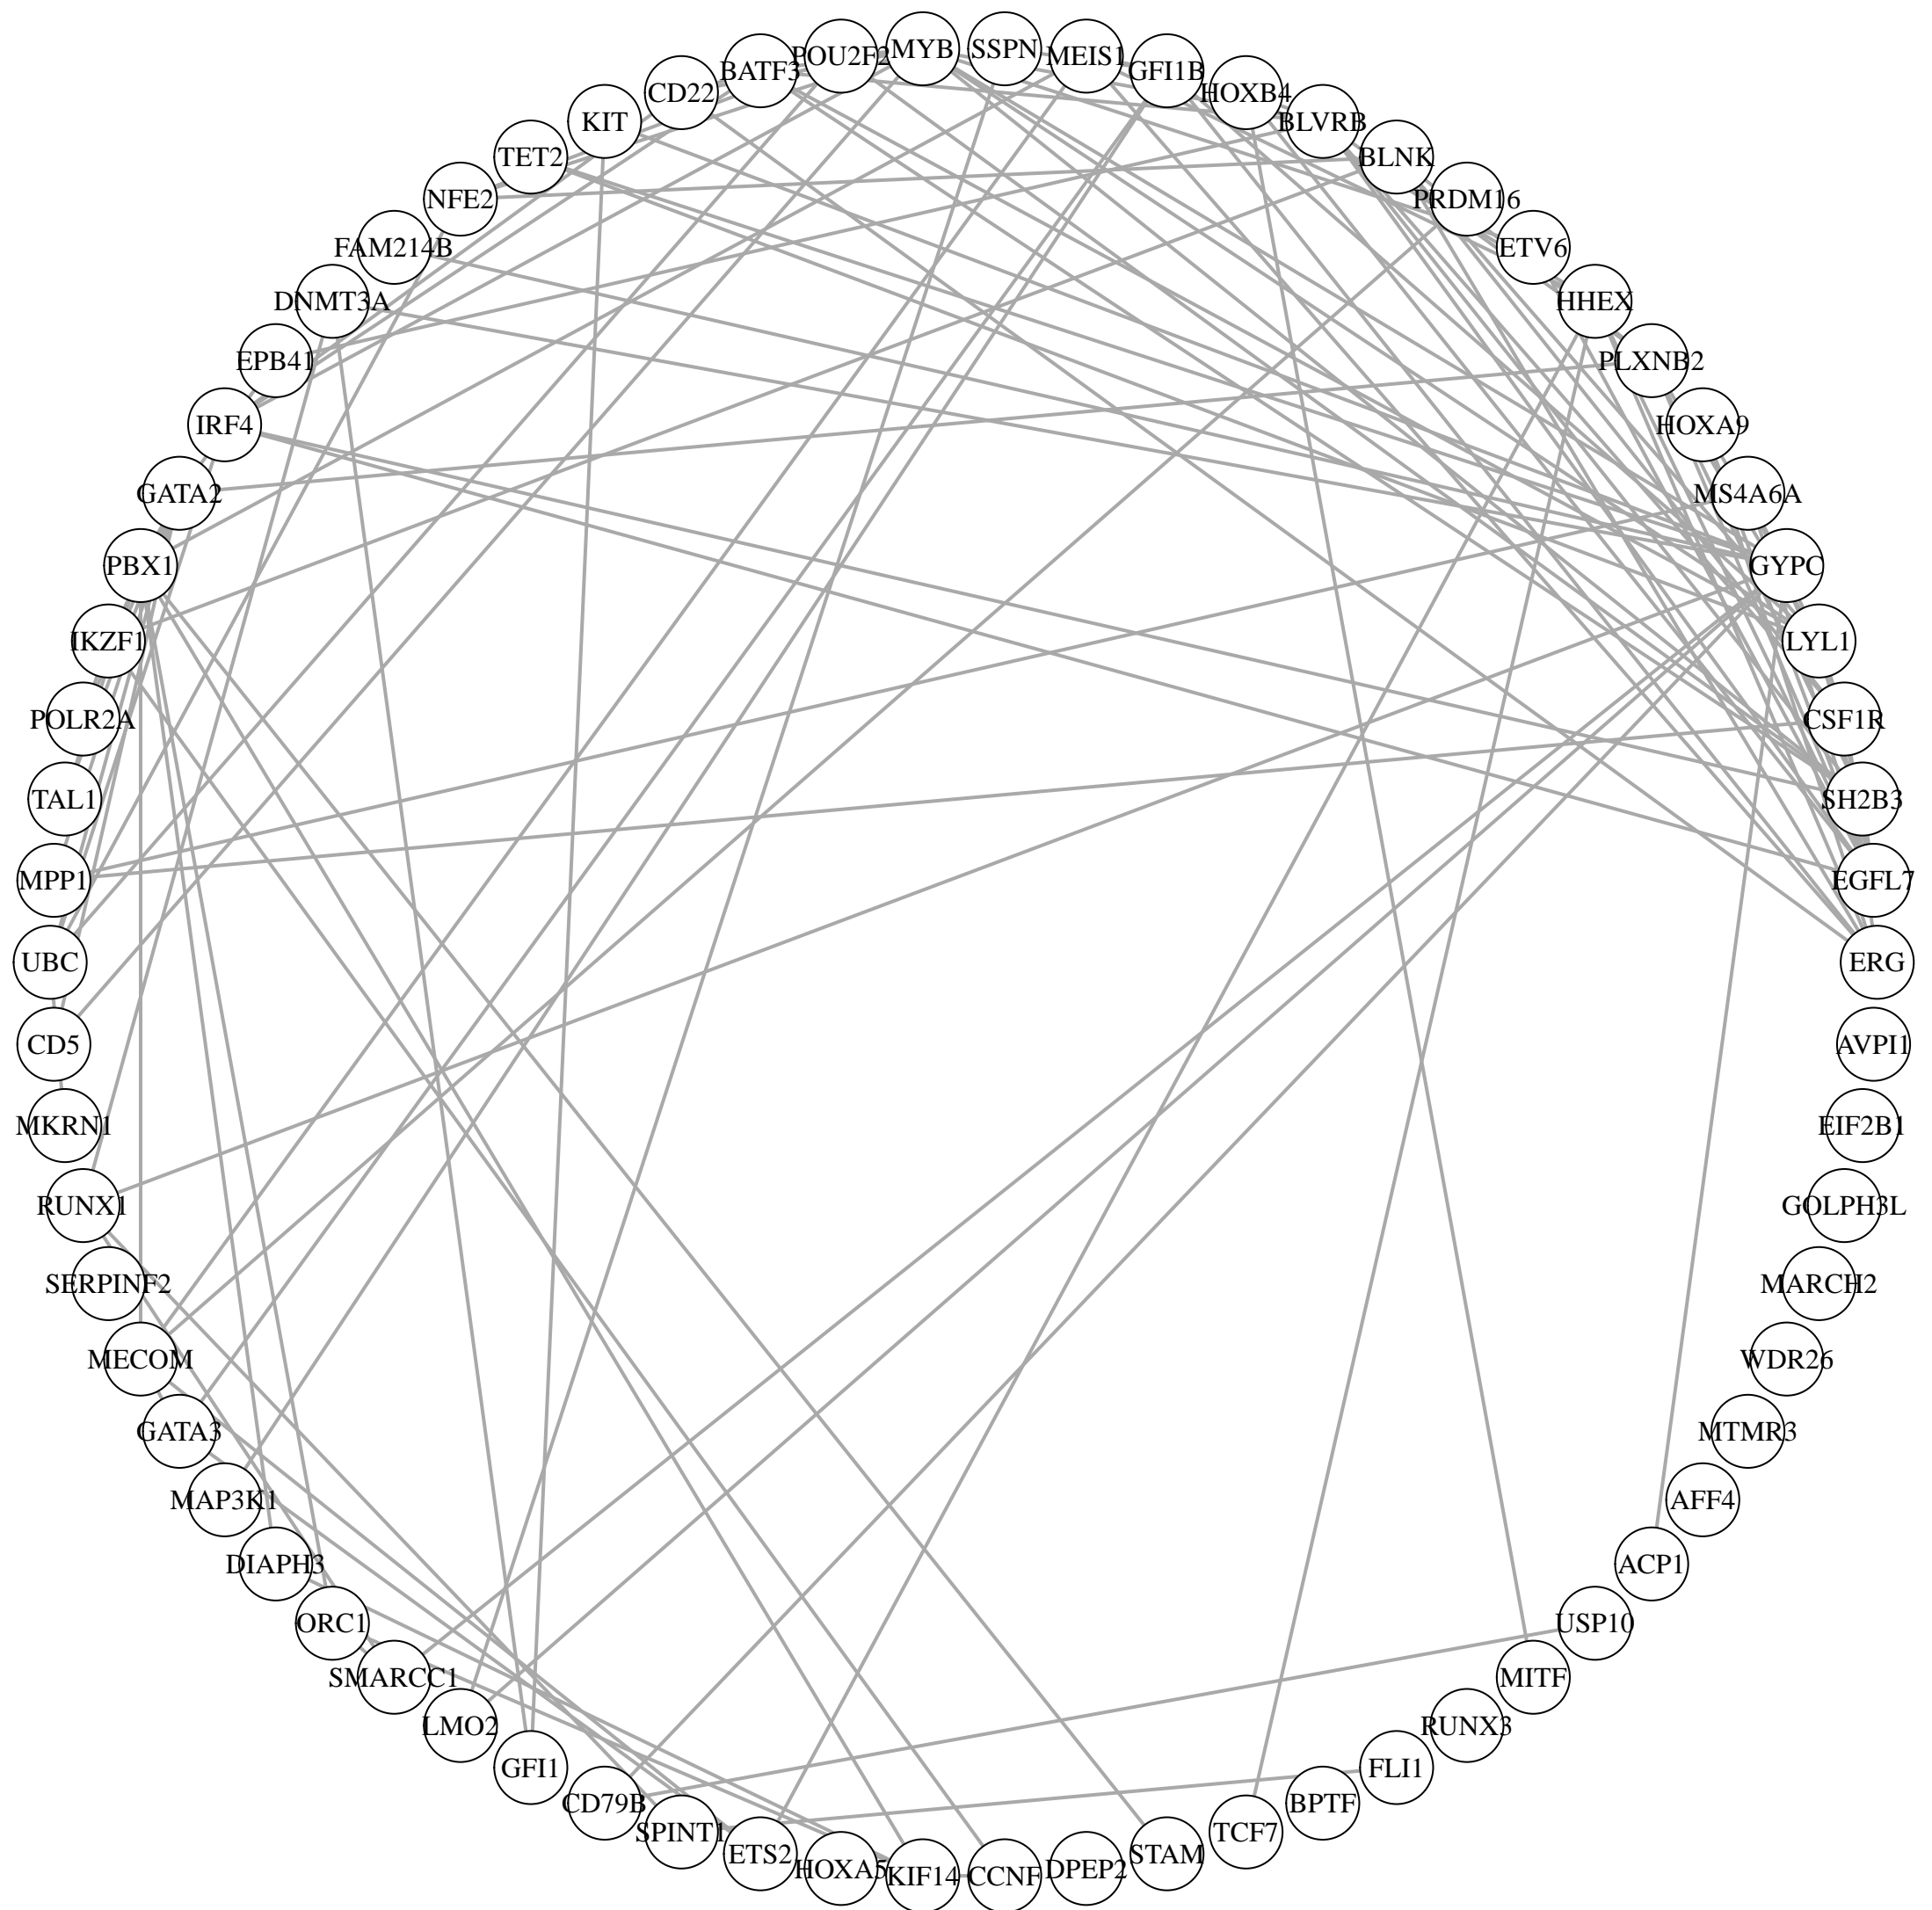

human\_HSCtoGMP\_time 8

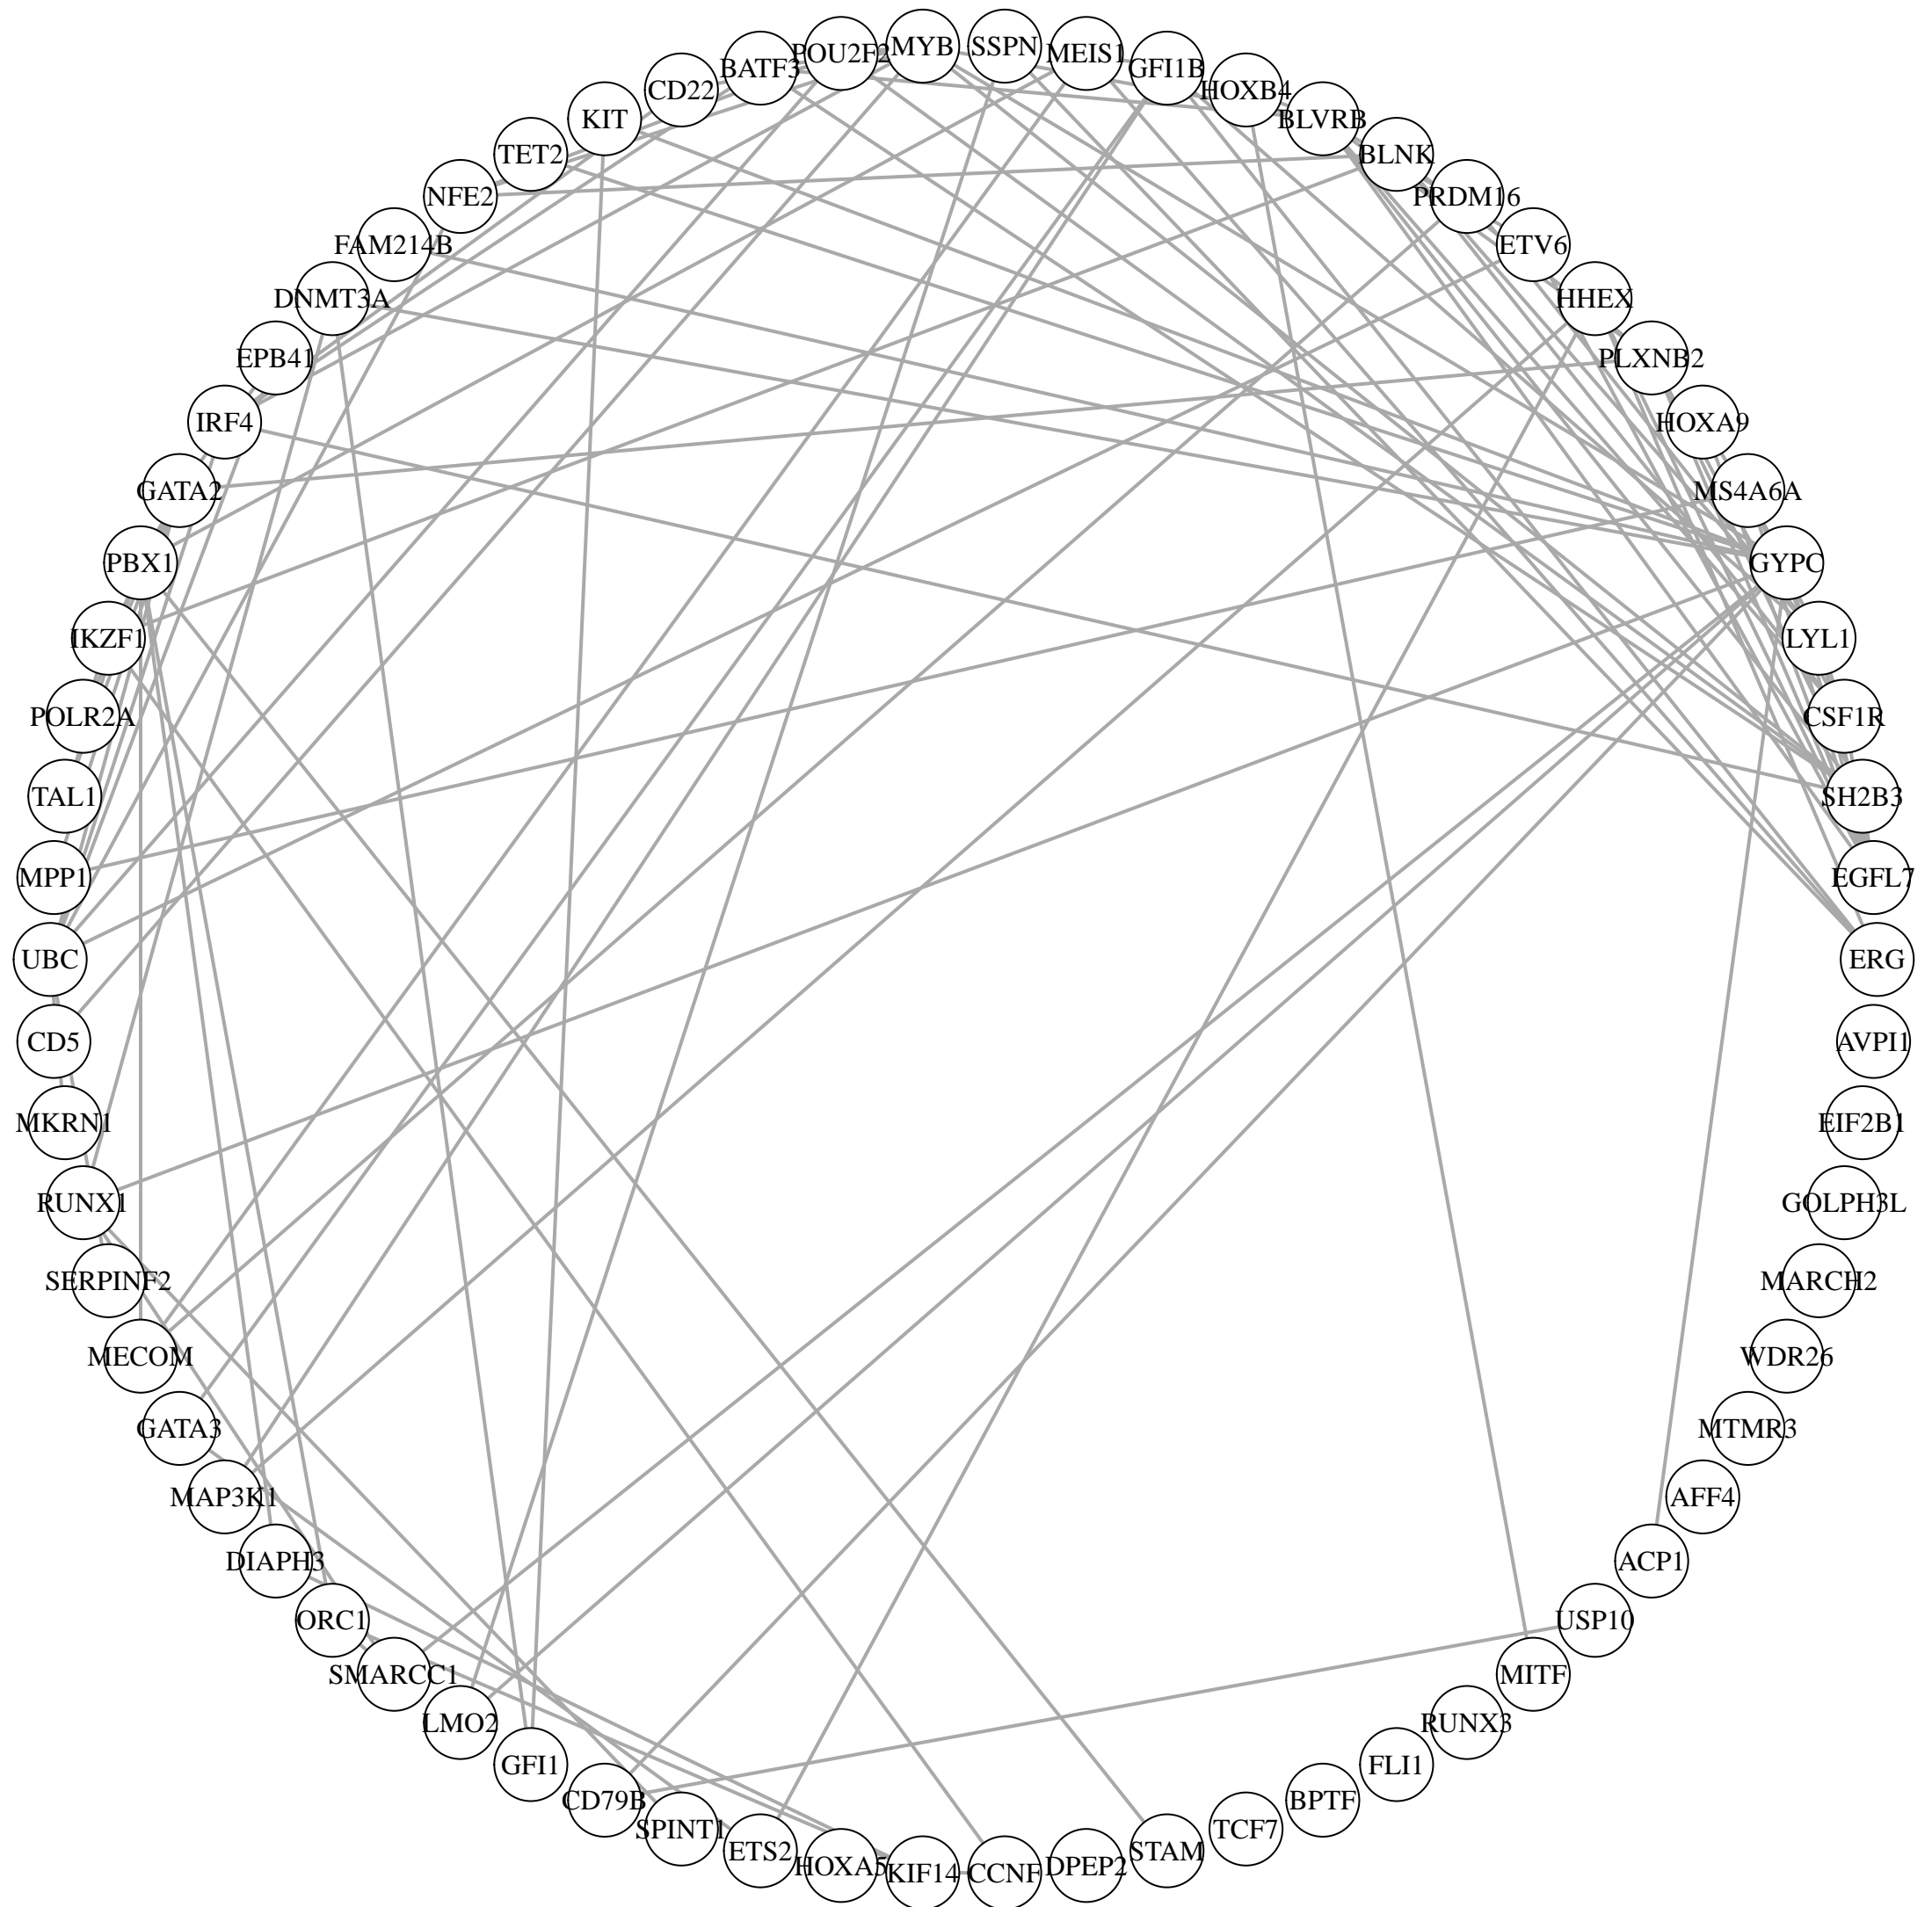

human\_HSCtoGMP\_time 9

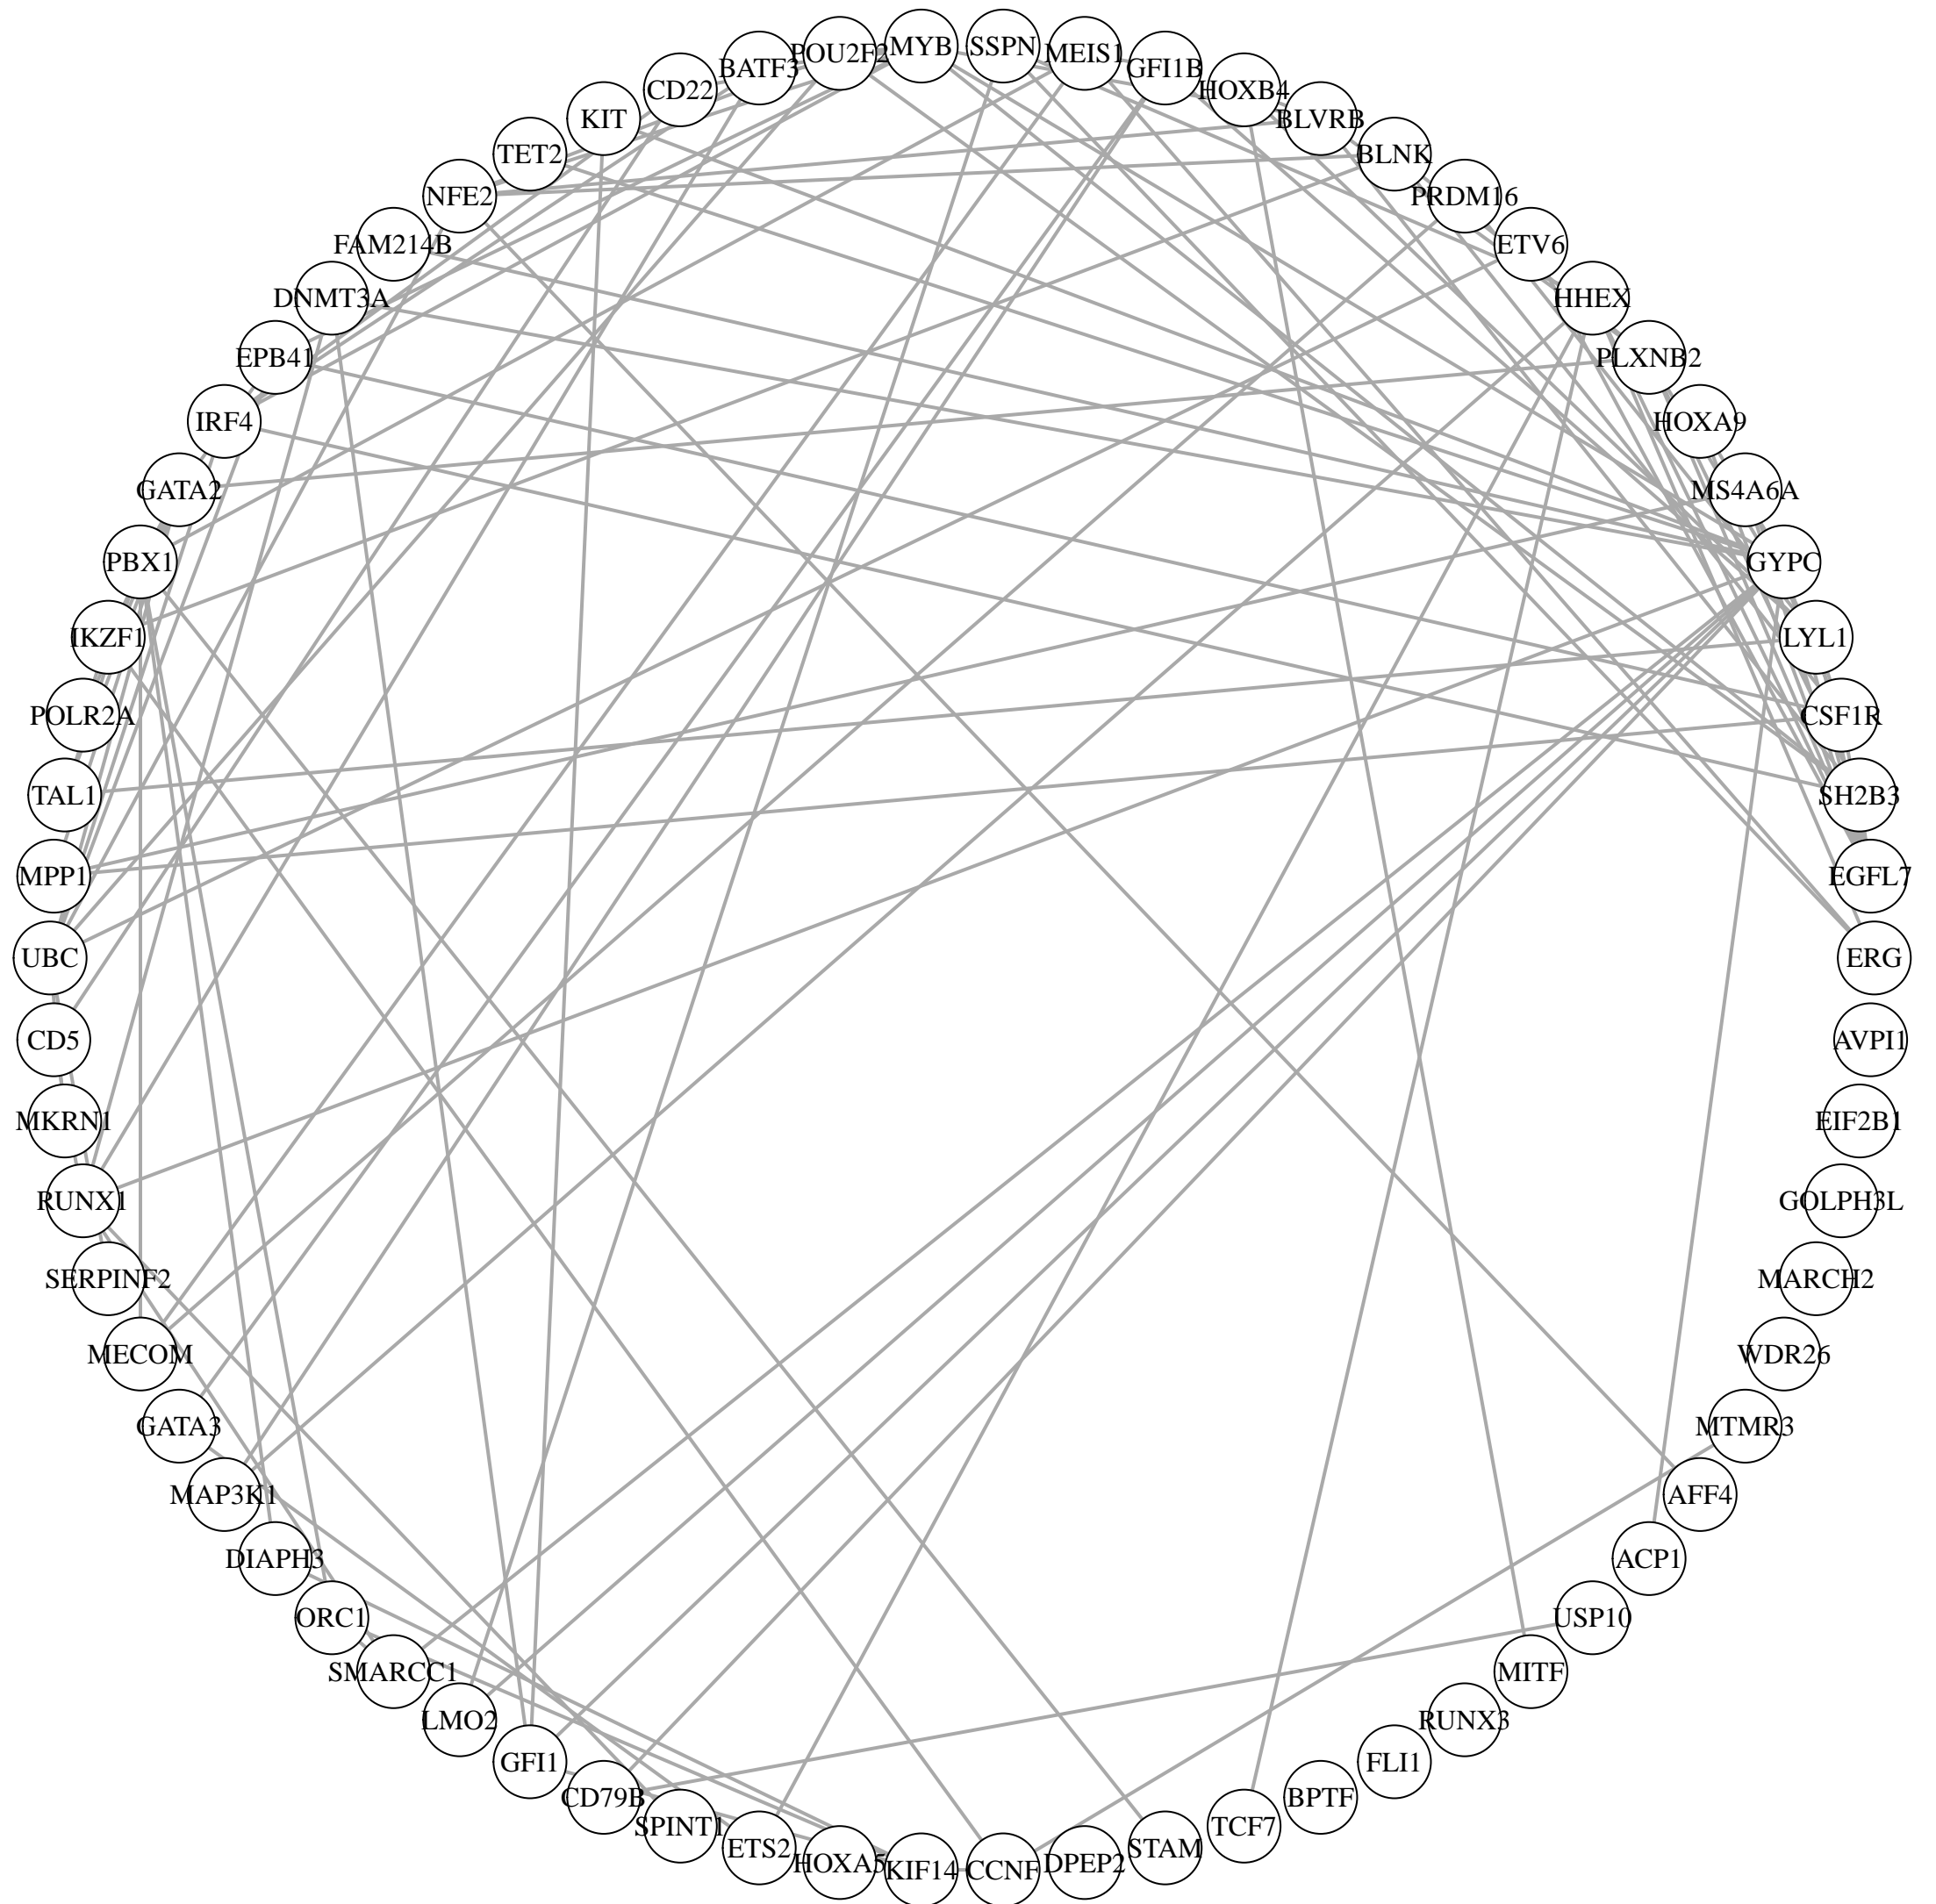

human\_HSCtoGMP\_time 10

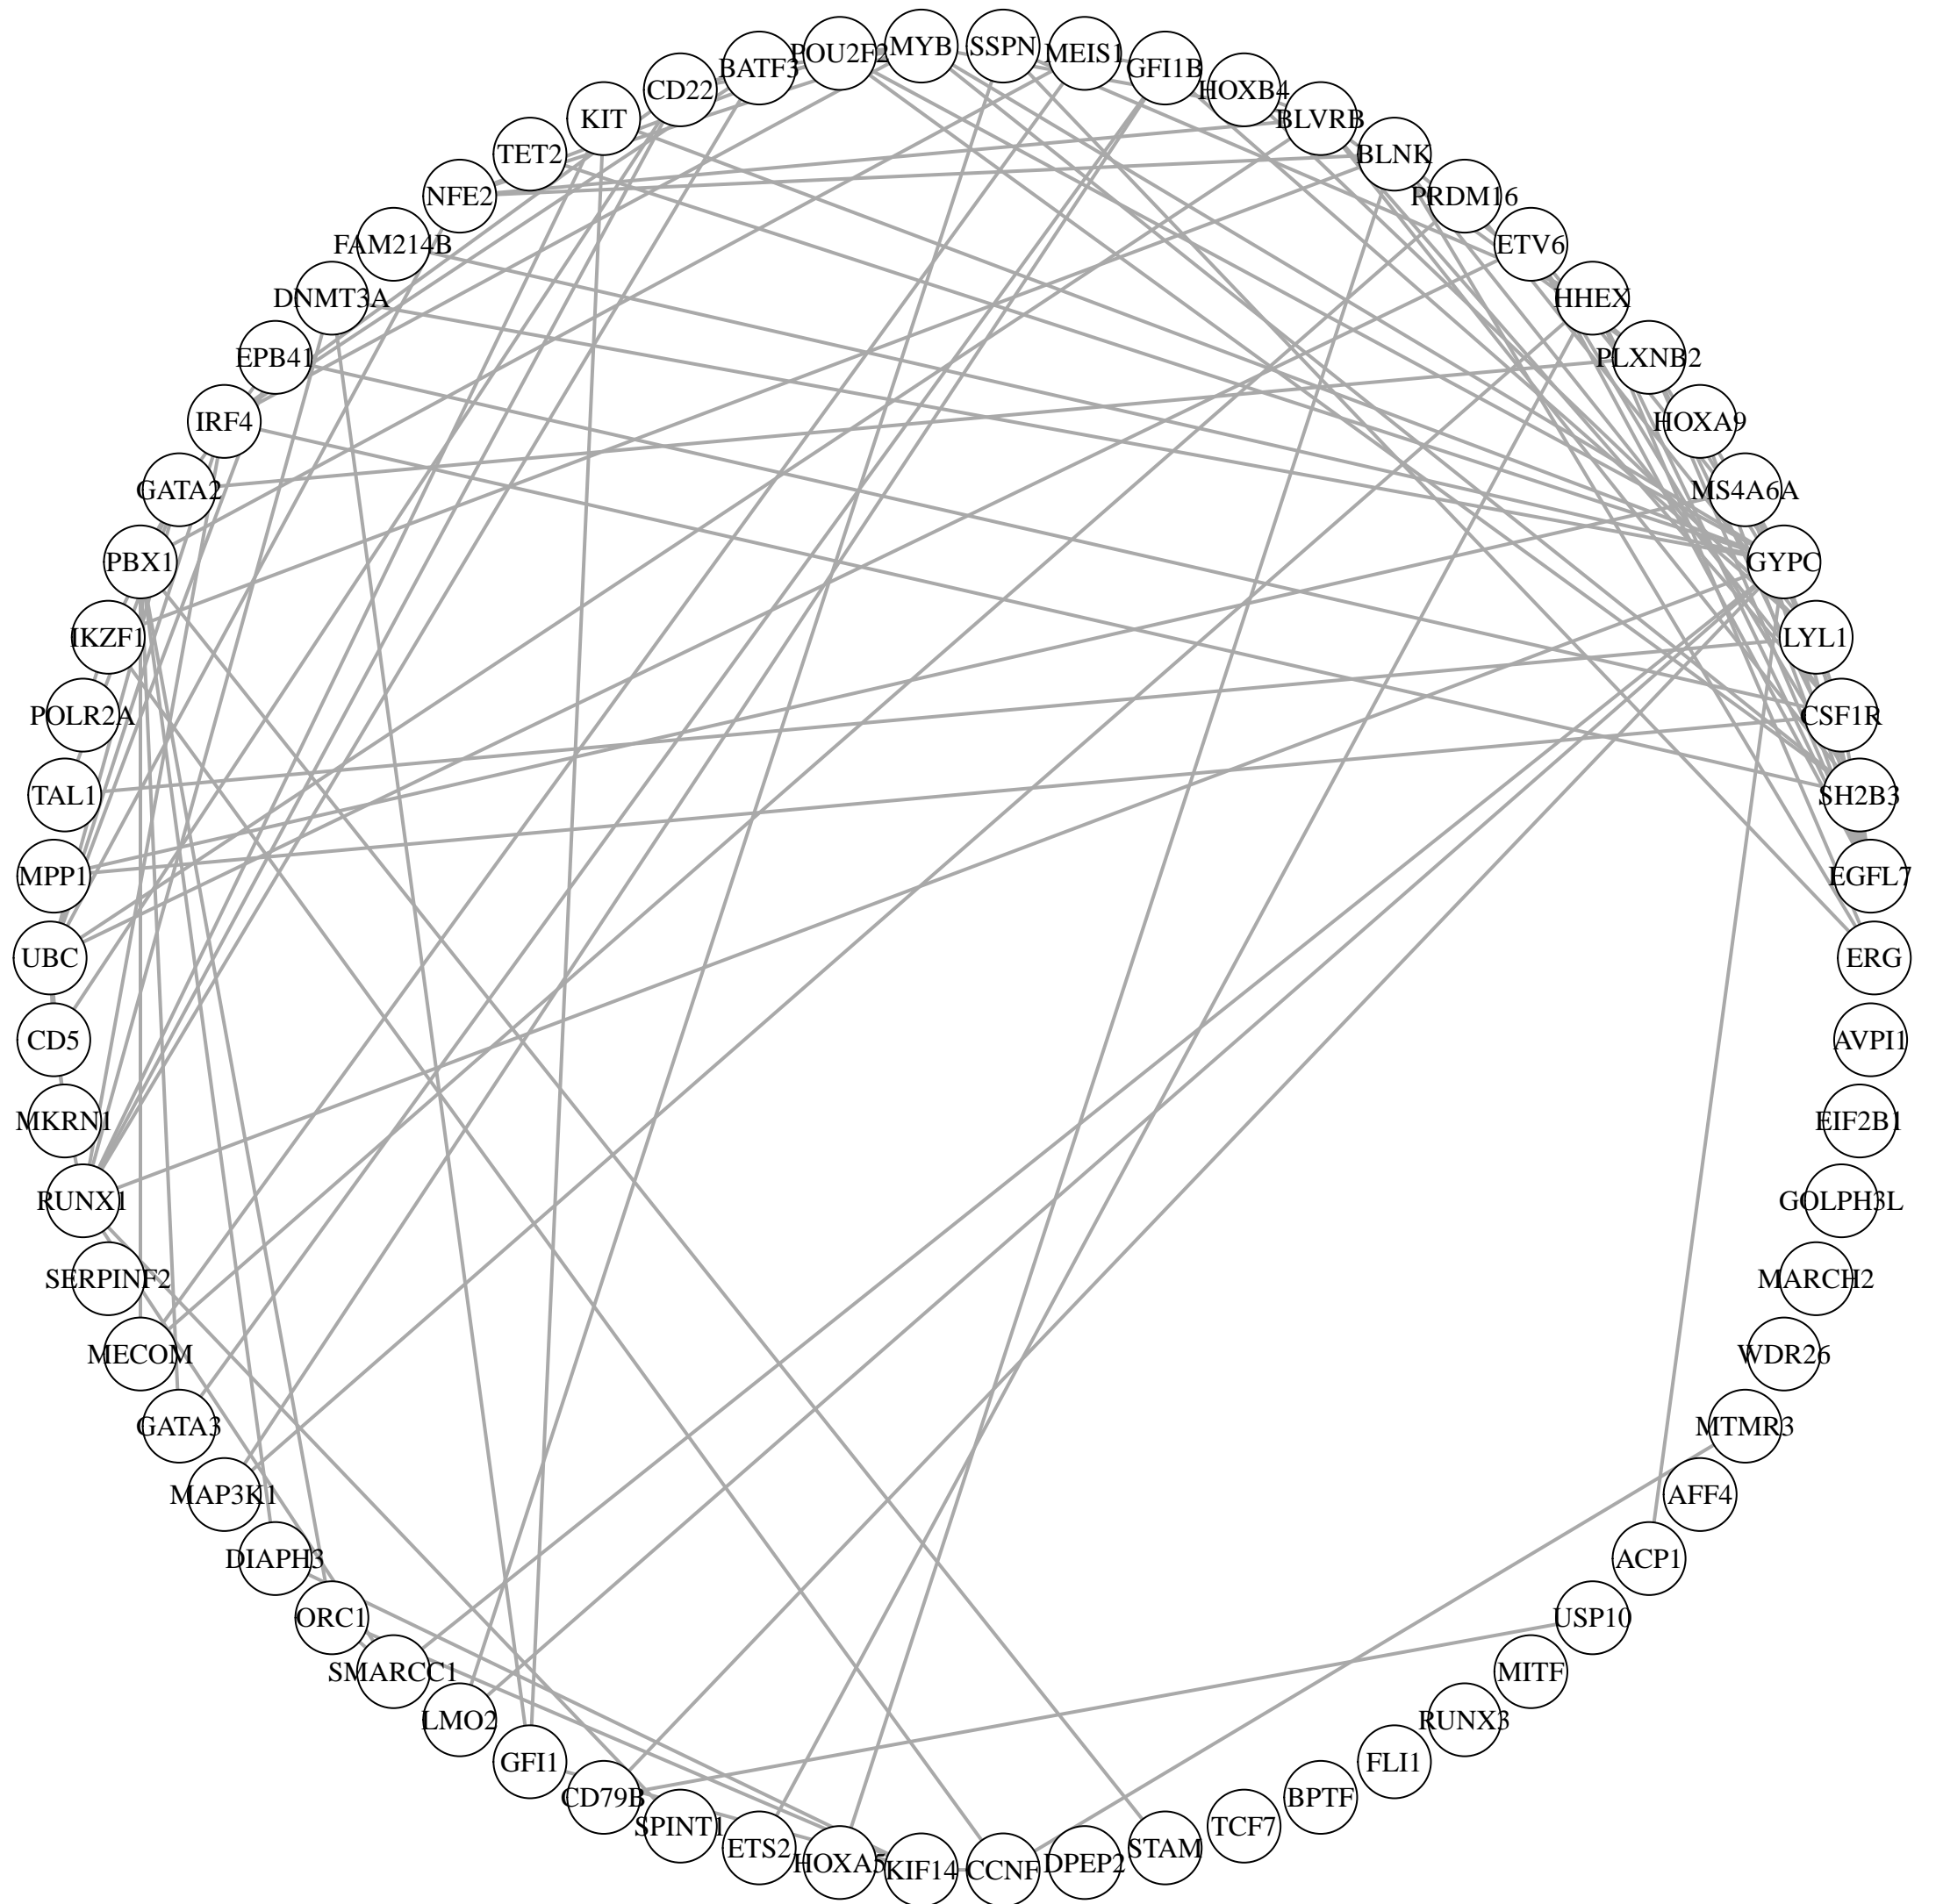



human\_HSCtoGMP\_time 11

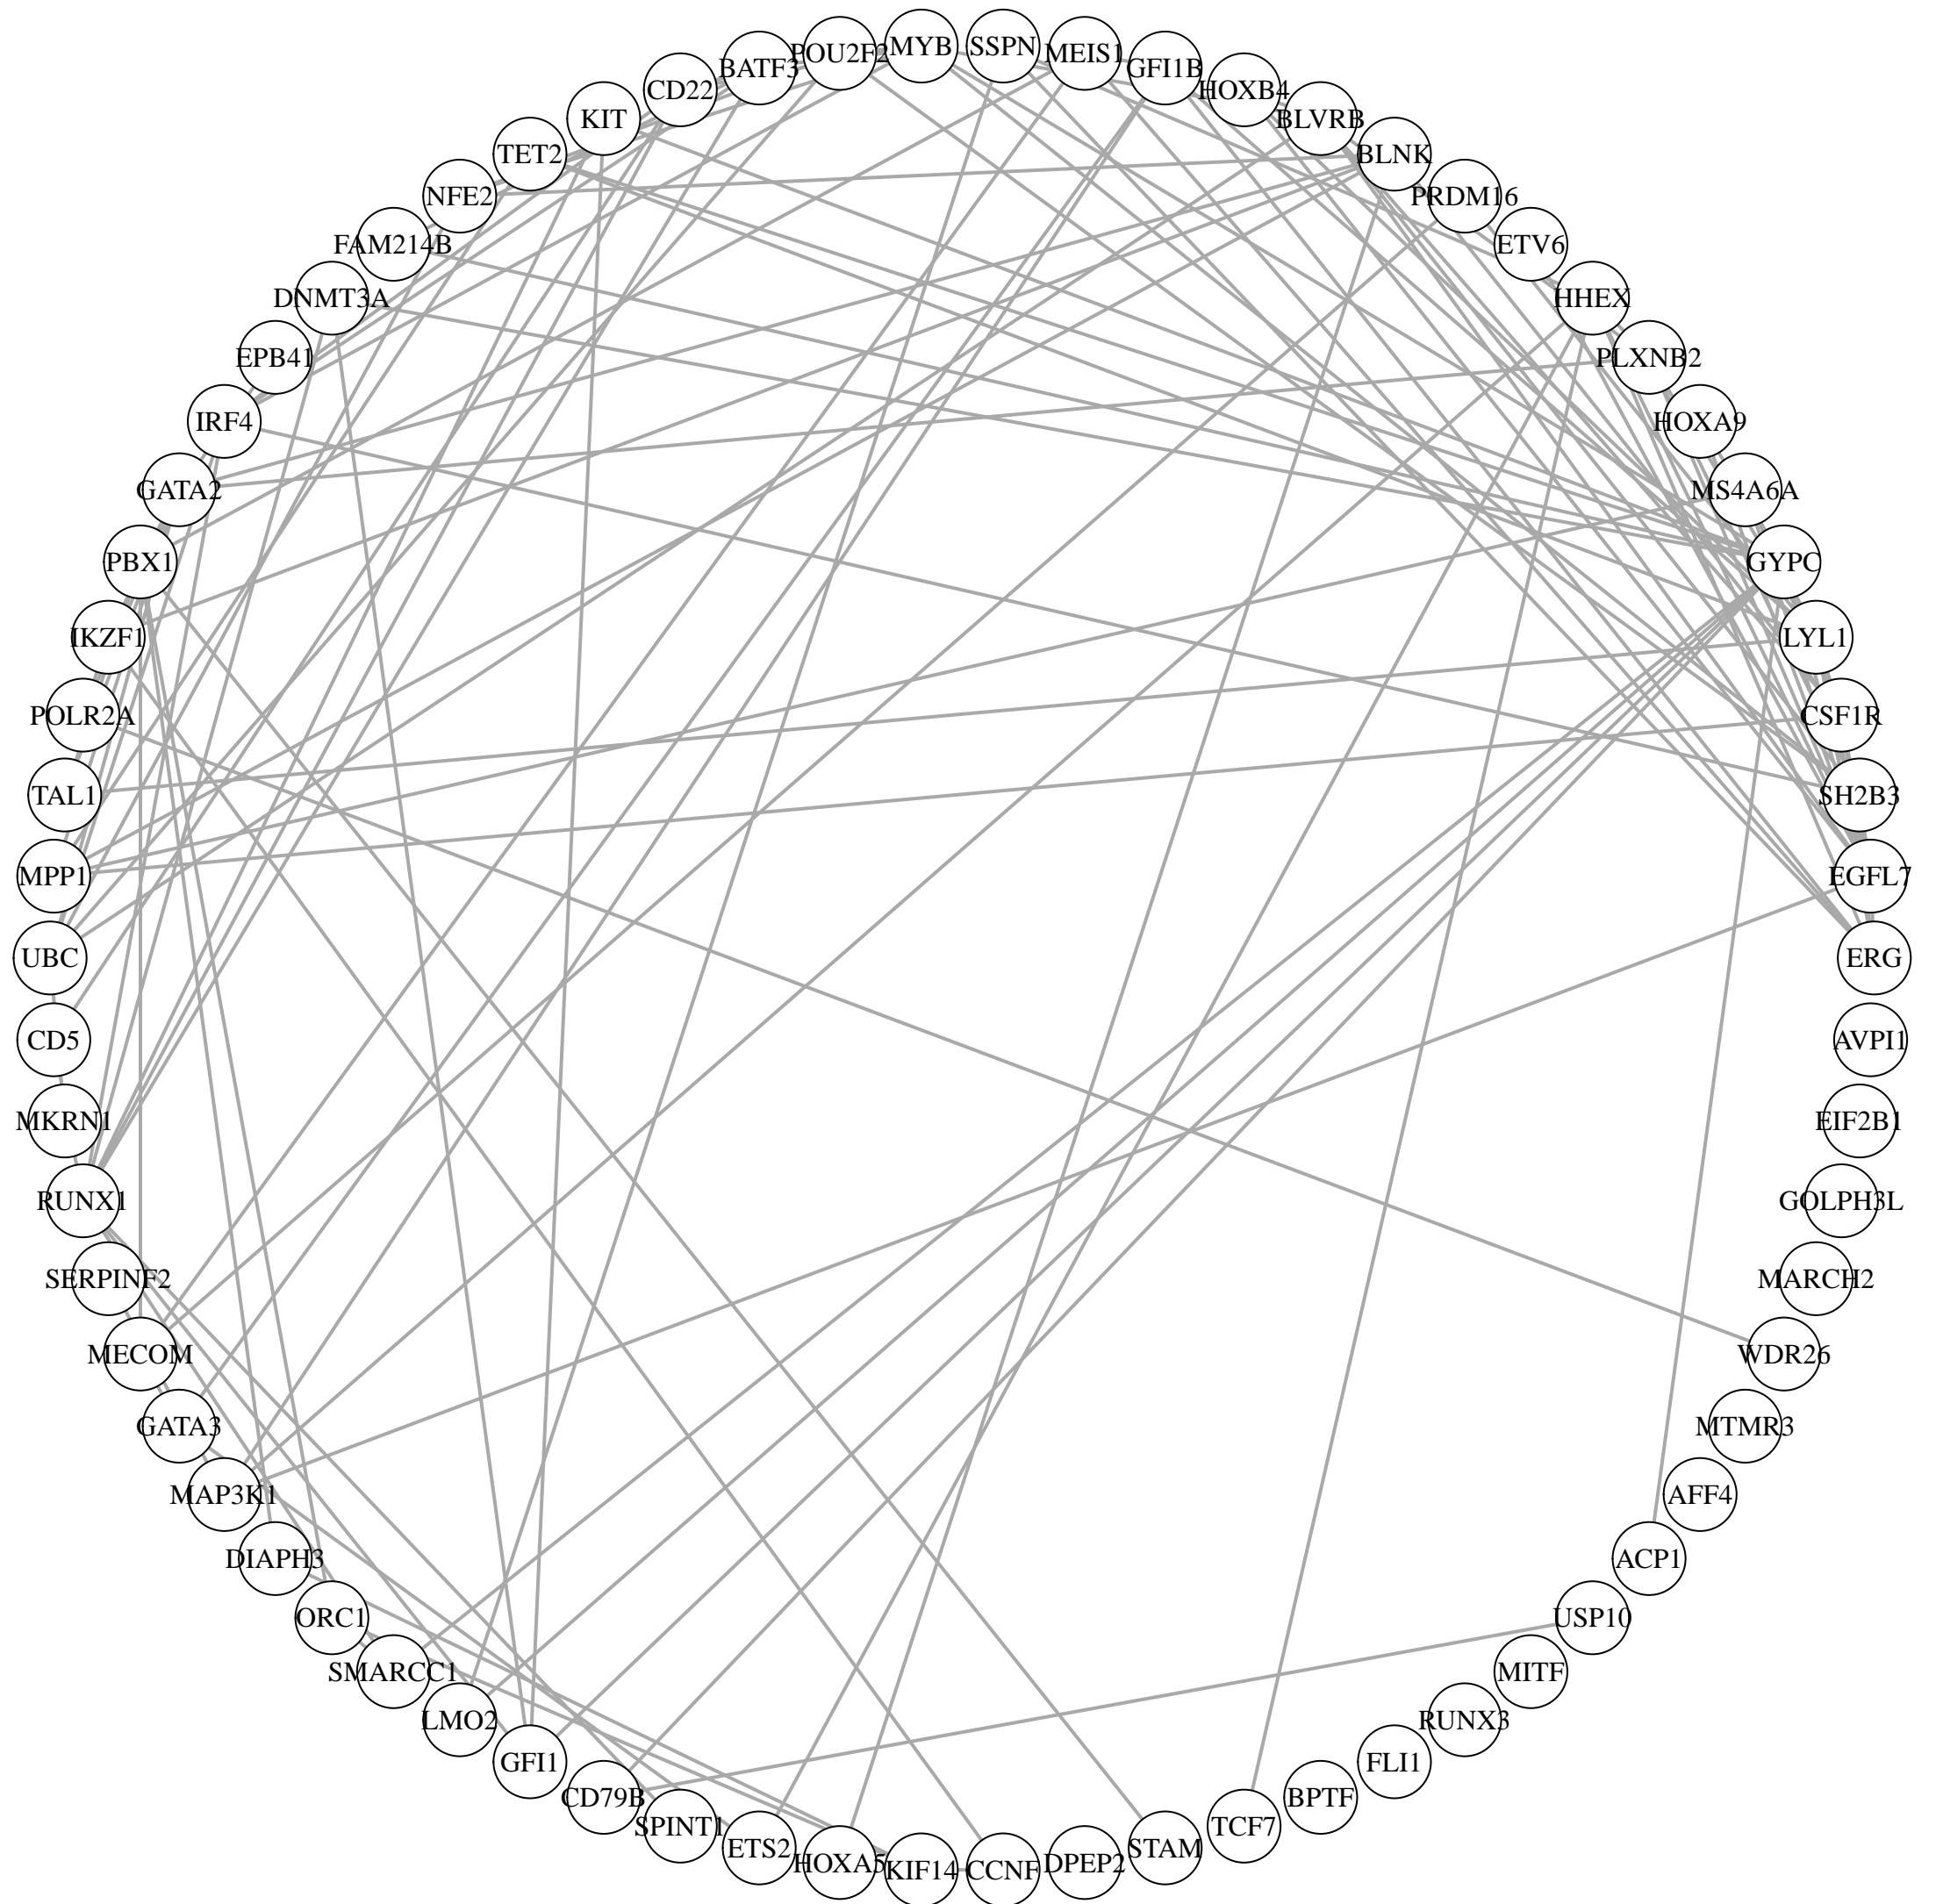

human\_HSCtoGMP\_time 12

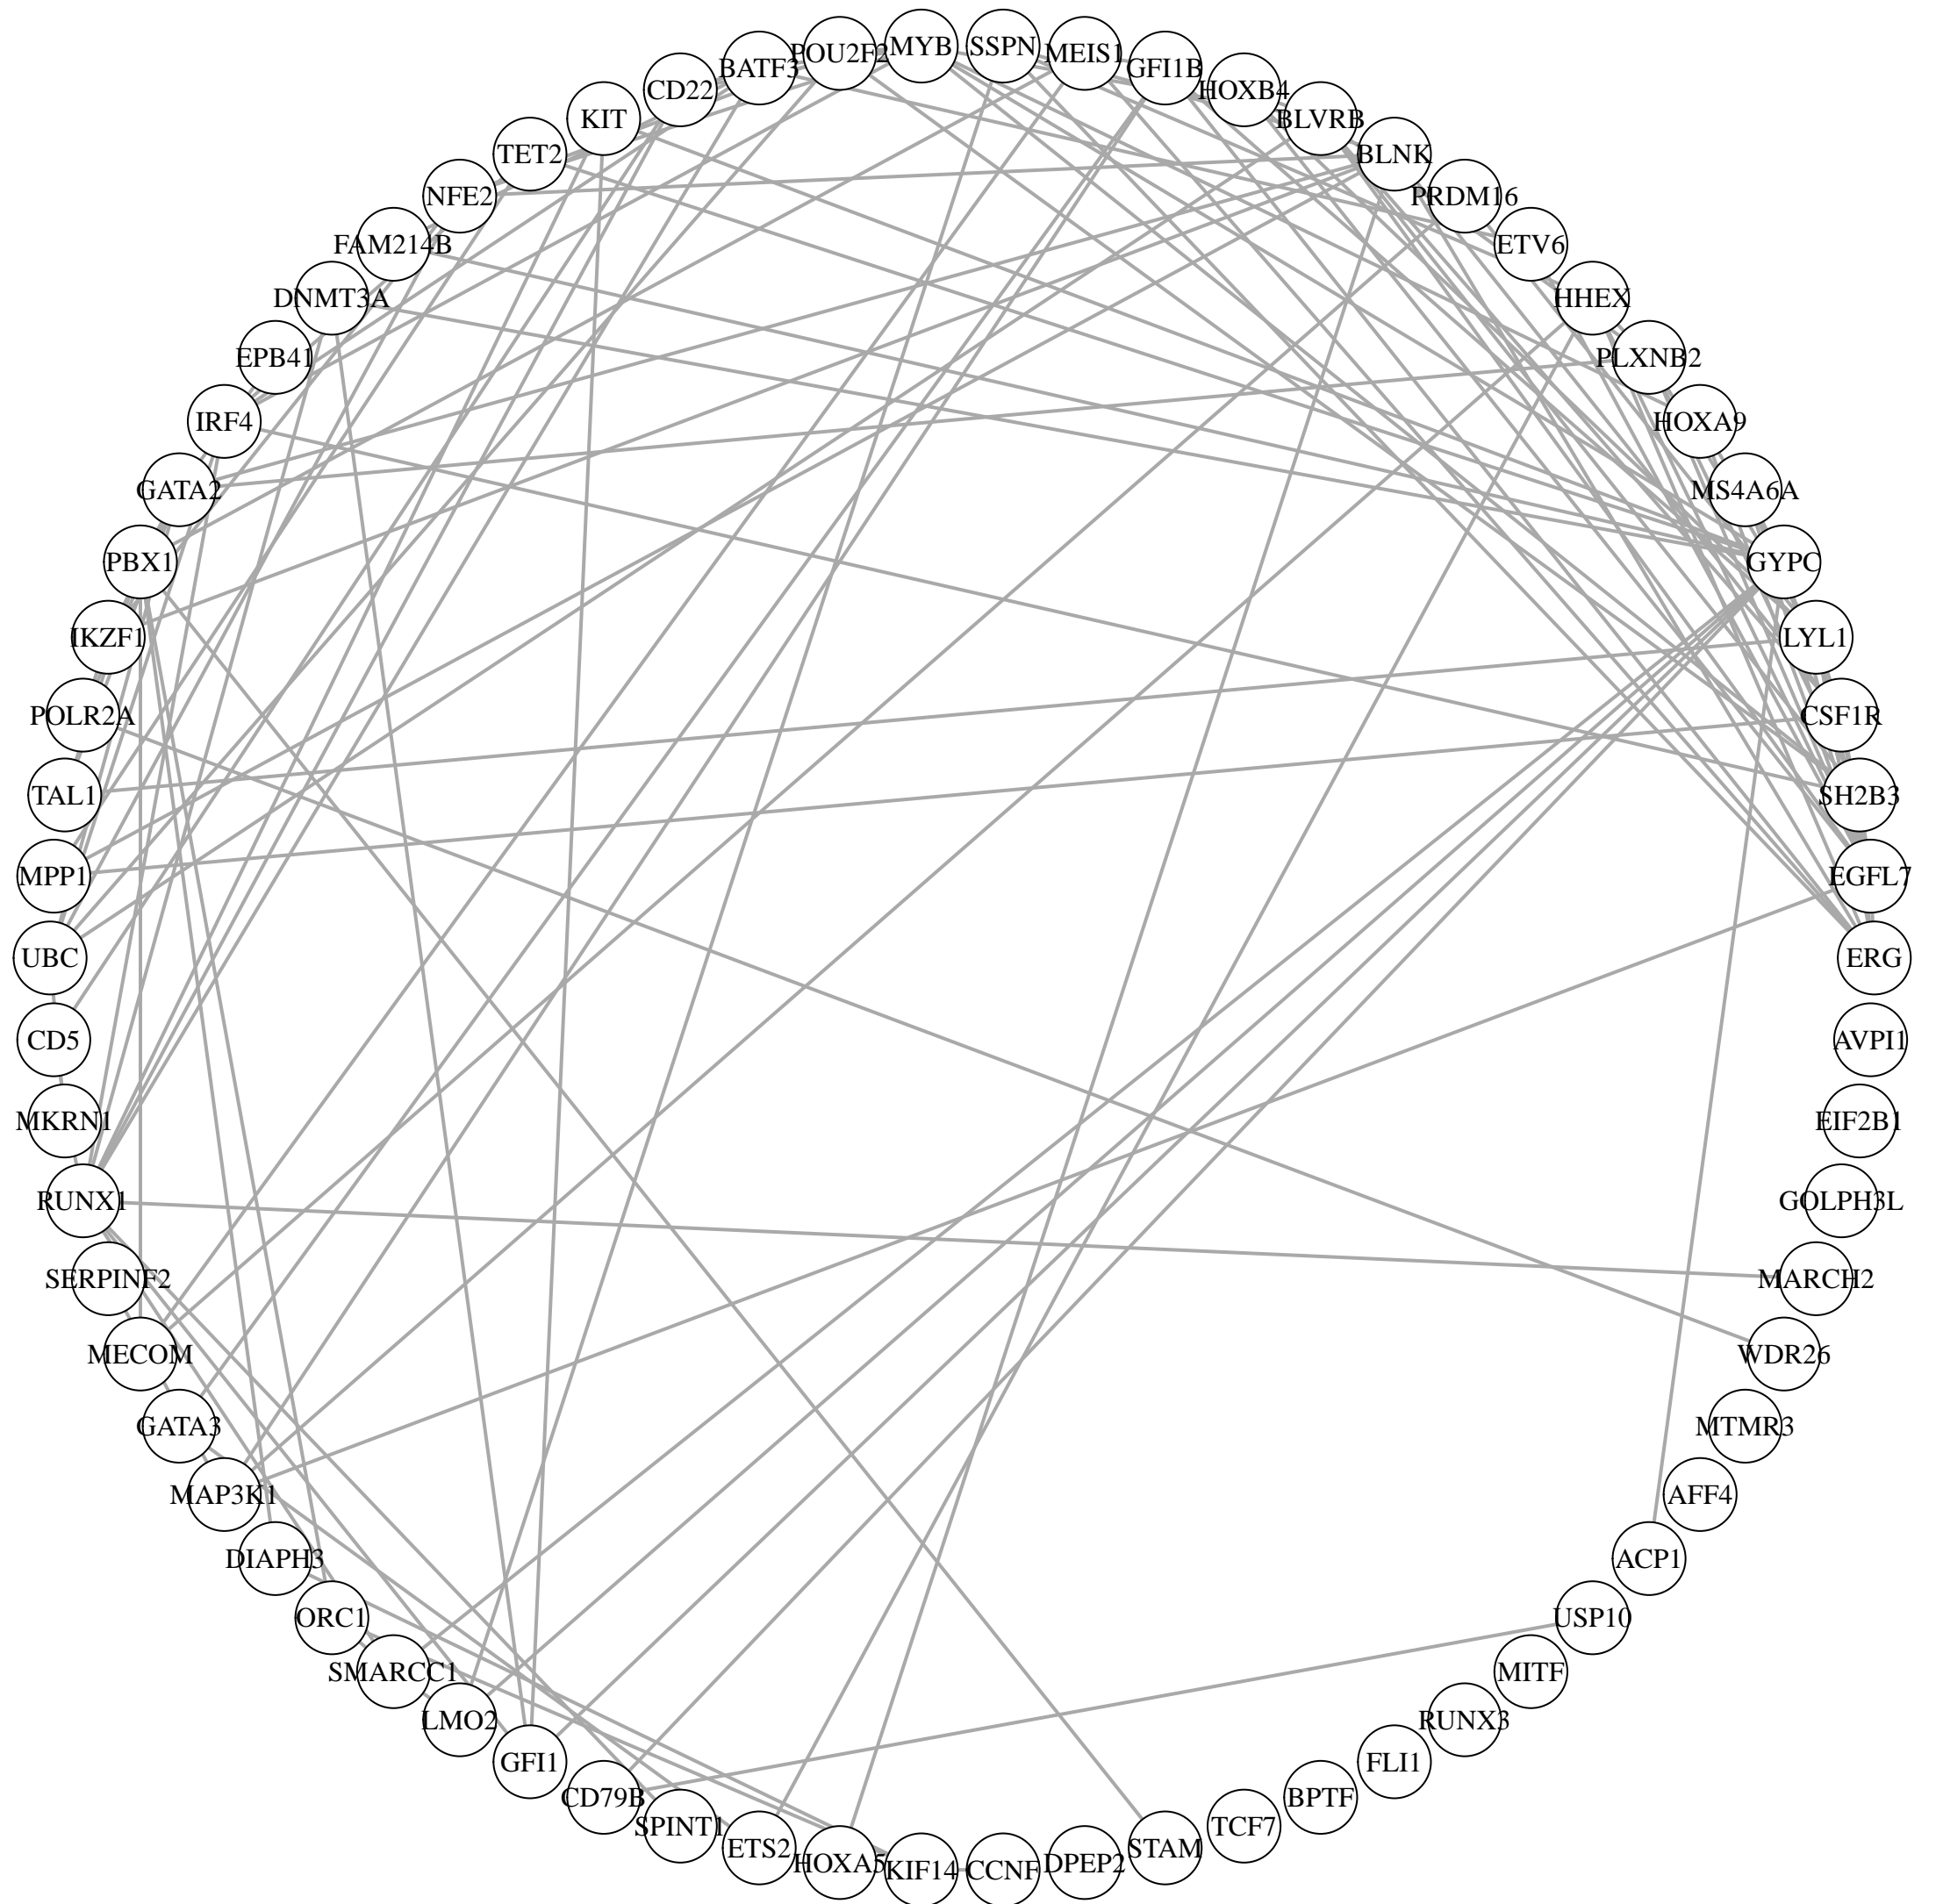

human\_HSCtoGMP\_time 13

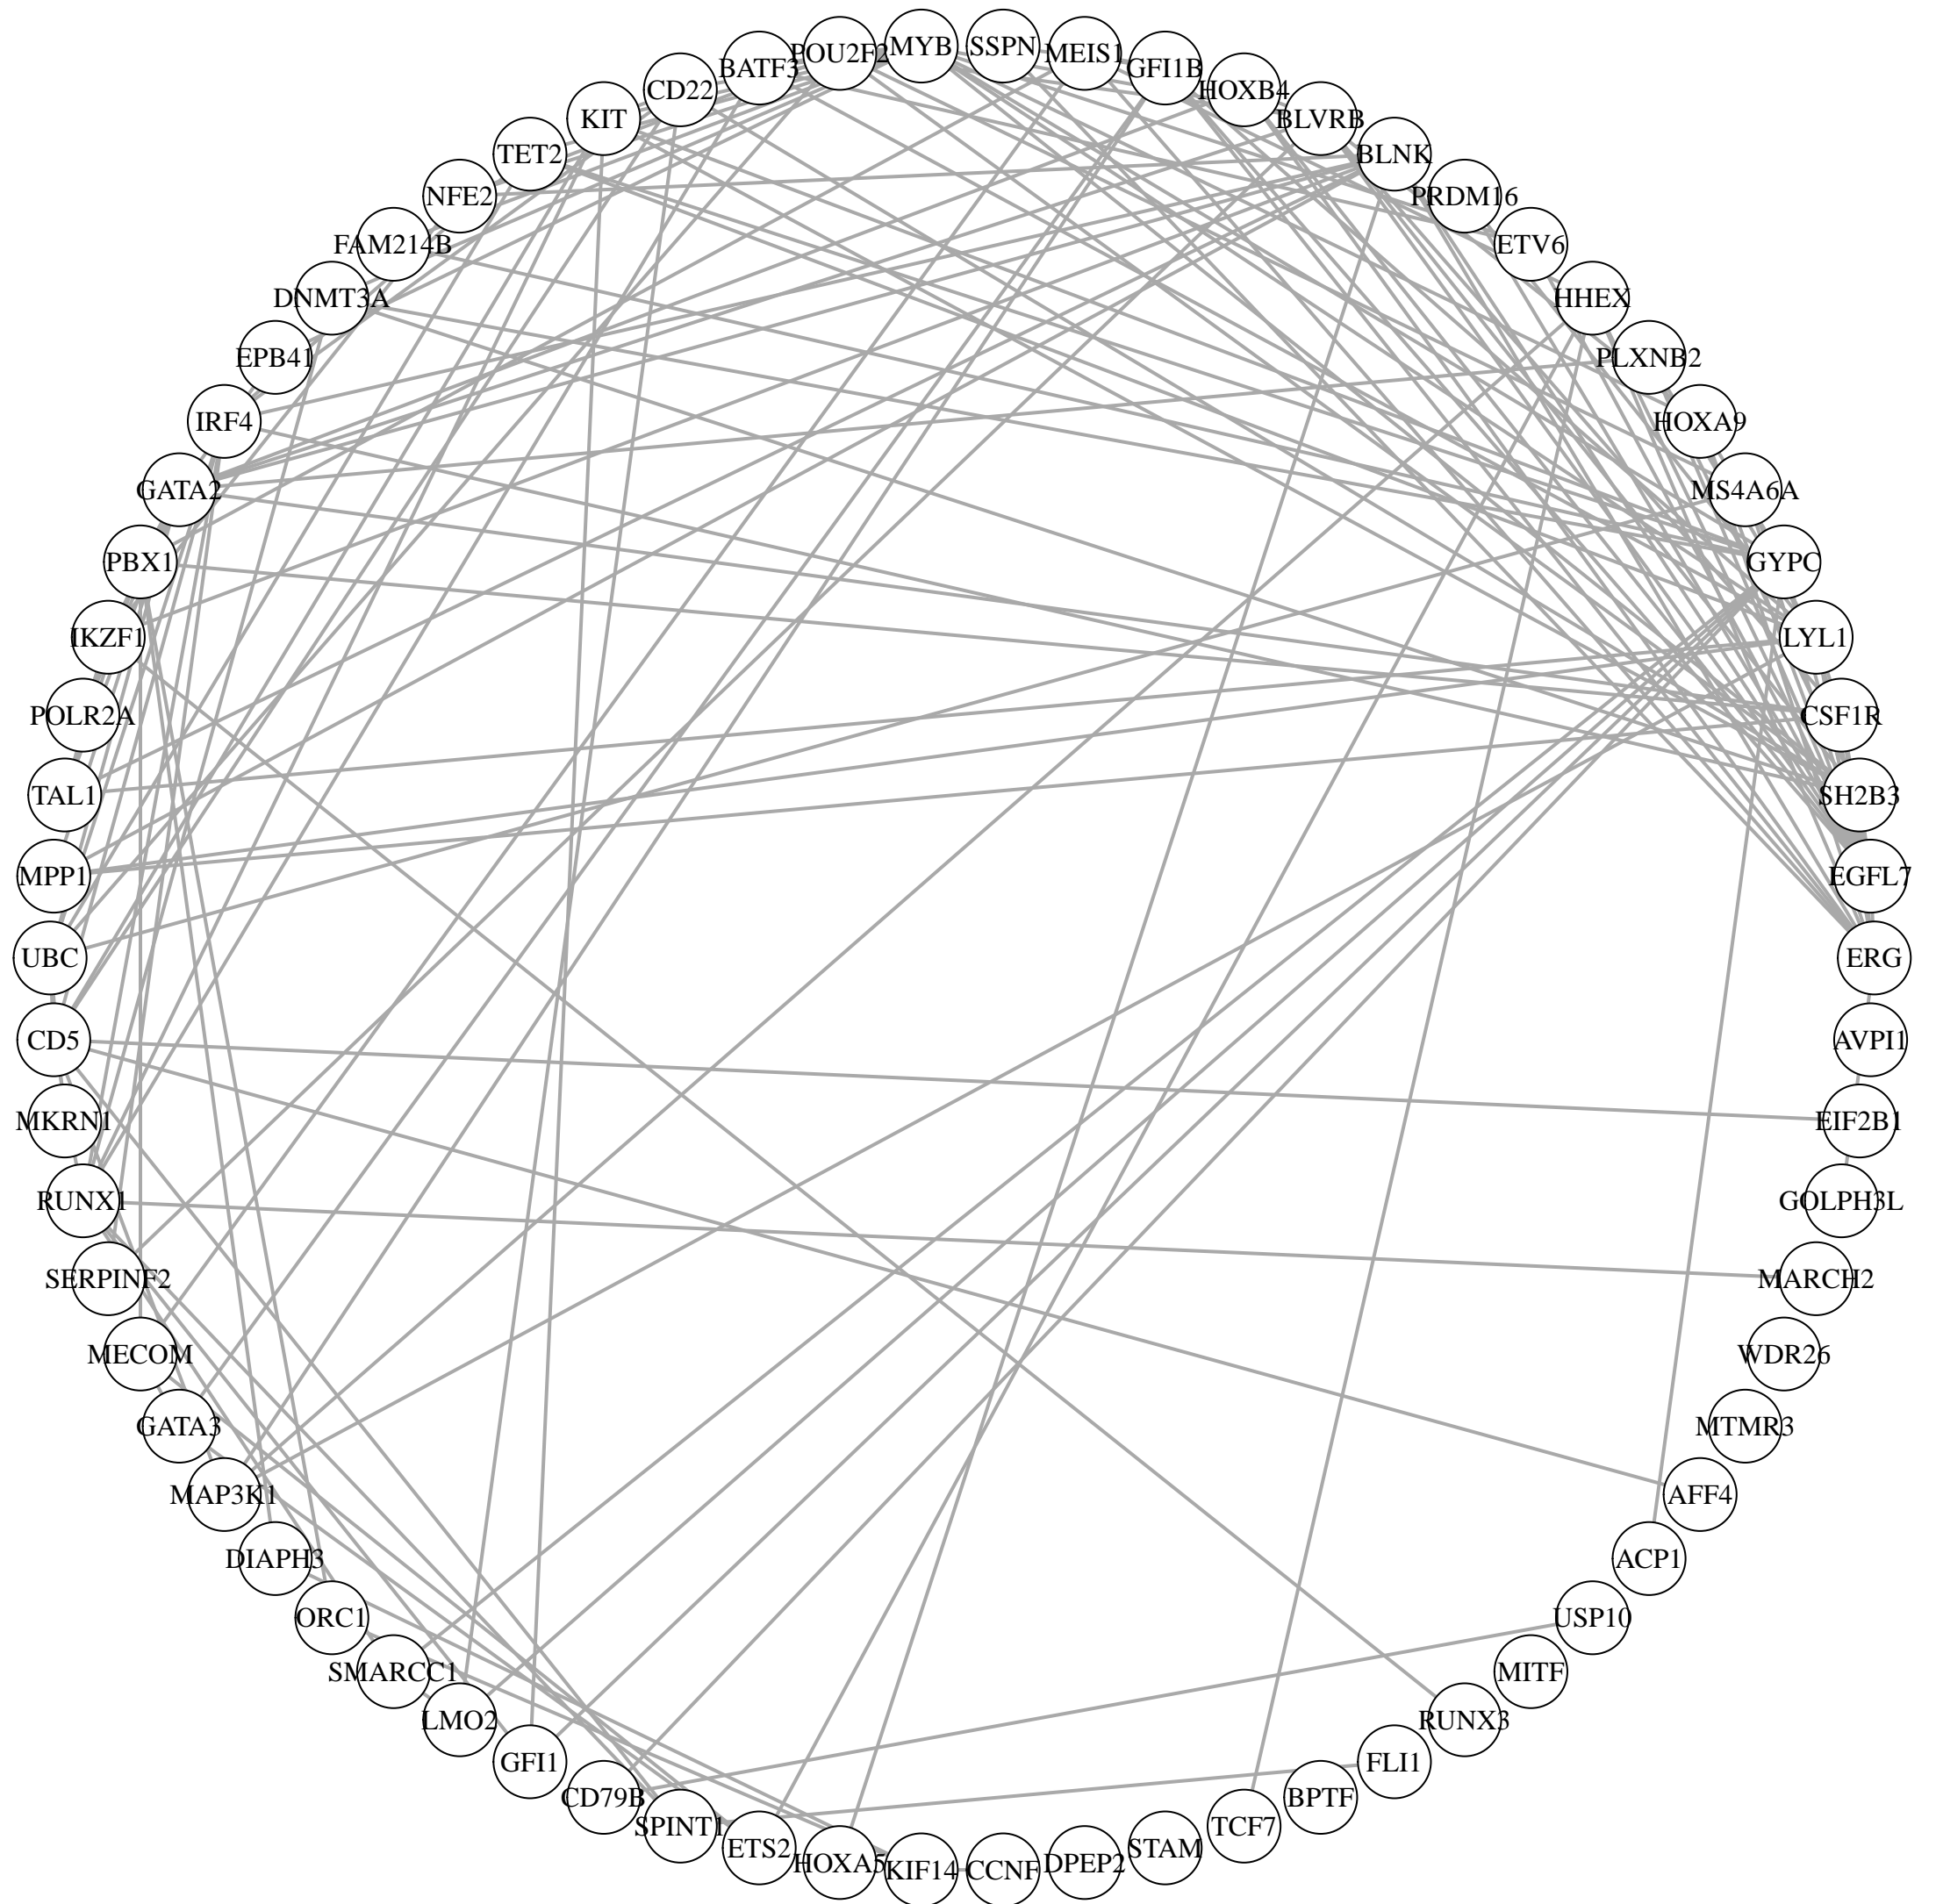

human\_HSCtoGMP\_time 14



human\_HSCtoGMP\_time 15



human\_HSCtoGMP\_time 16





human\_HSCtoGMP\_time 17



human\_HSCtoGMP\_time 18



human\_HSCtoGMP\_time 19



human\_HSCtoGMP\_time 20



human\_HSCtoGMP\_time 21



human\_HSCtoGMP\_time 22





human\_HSCtoGMP\_time 23

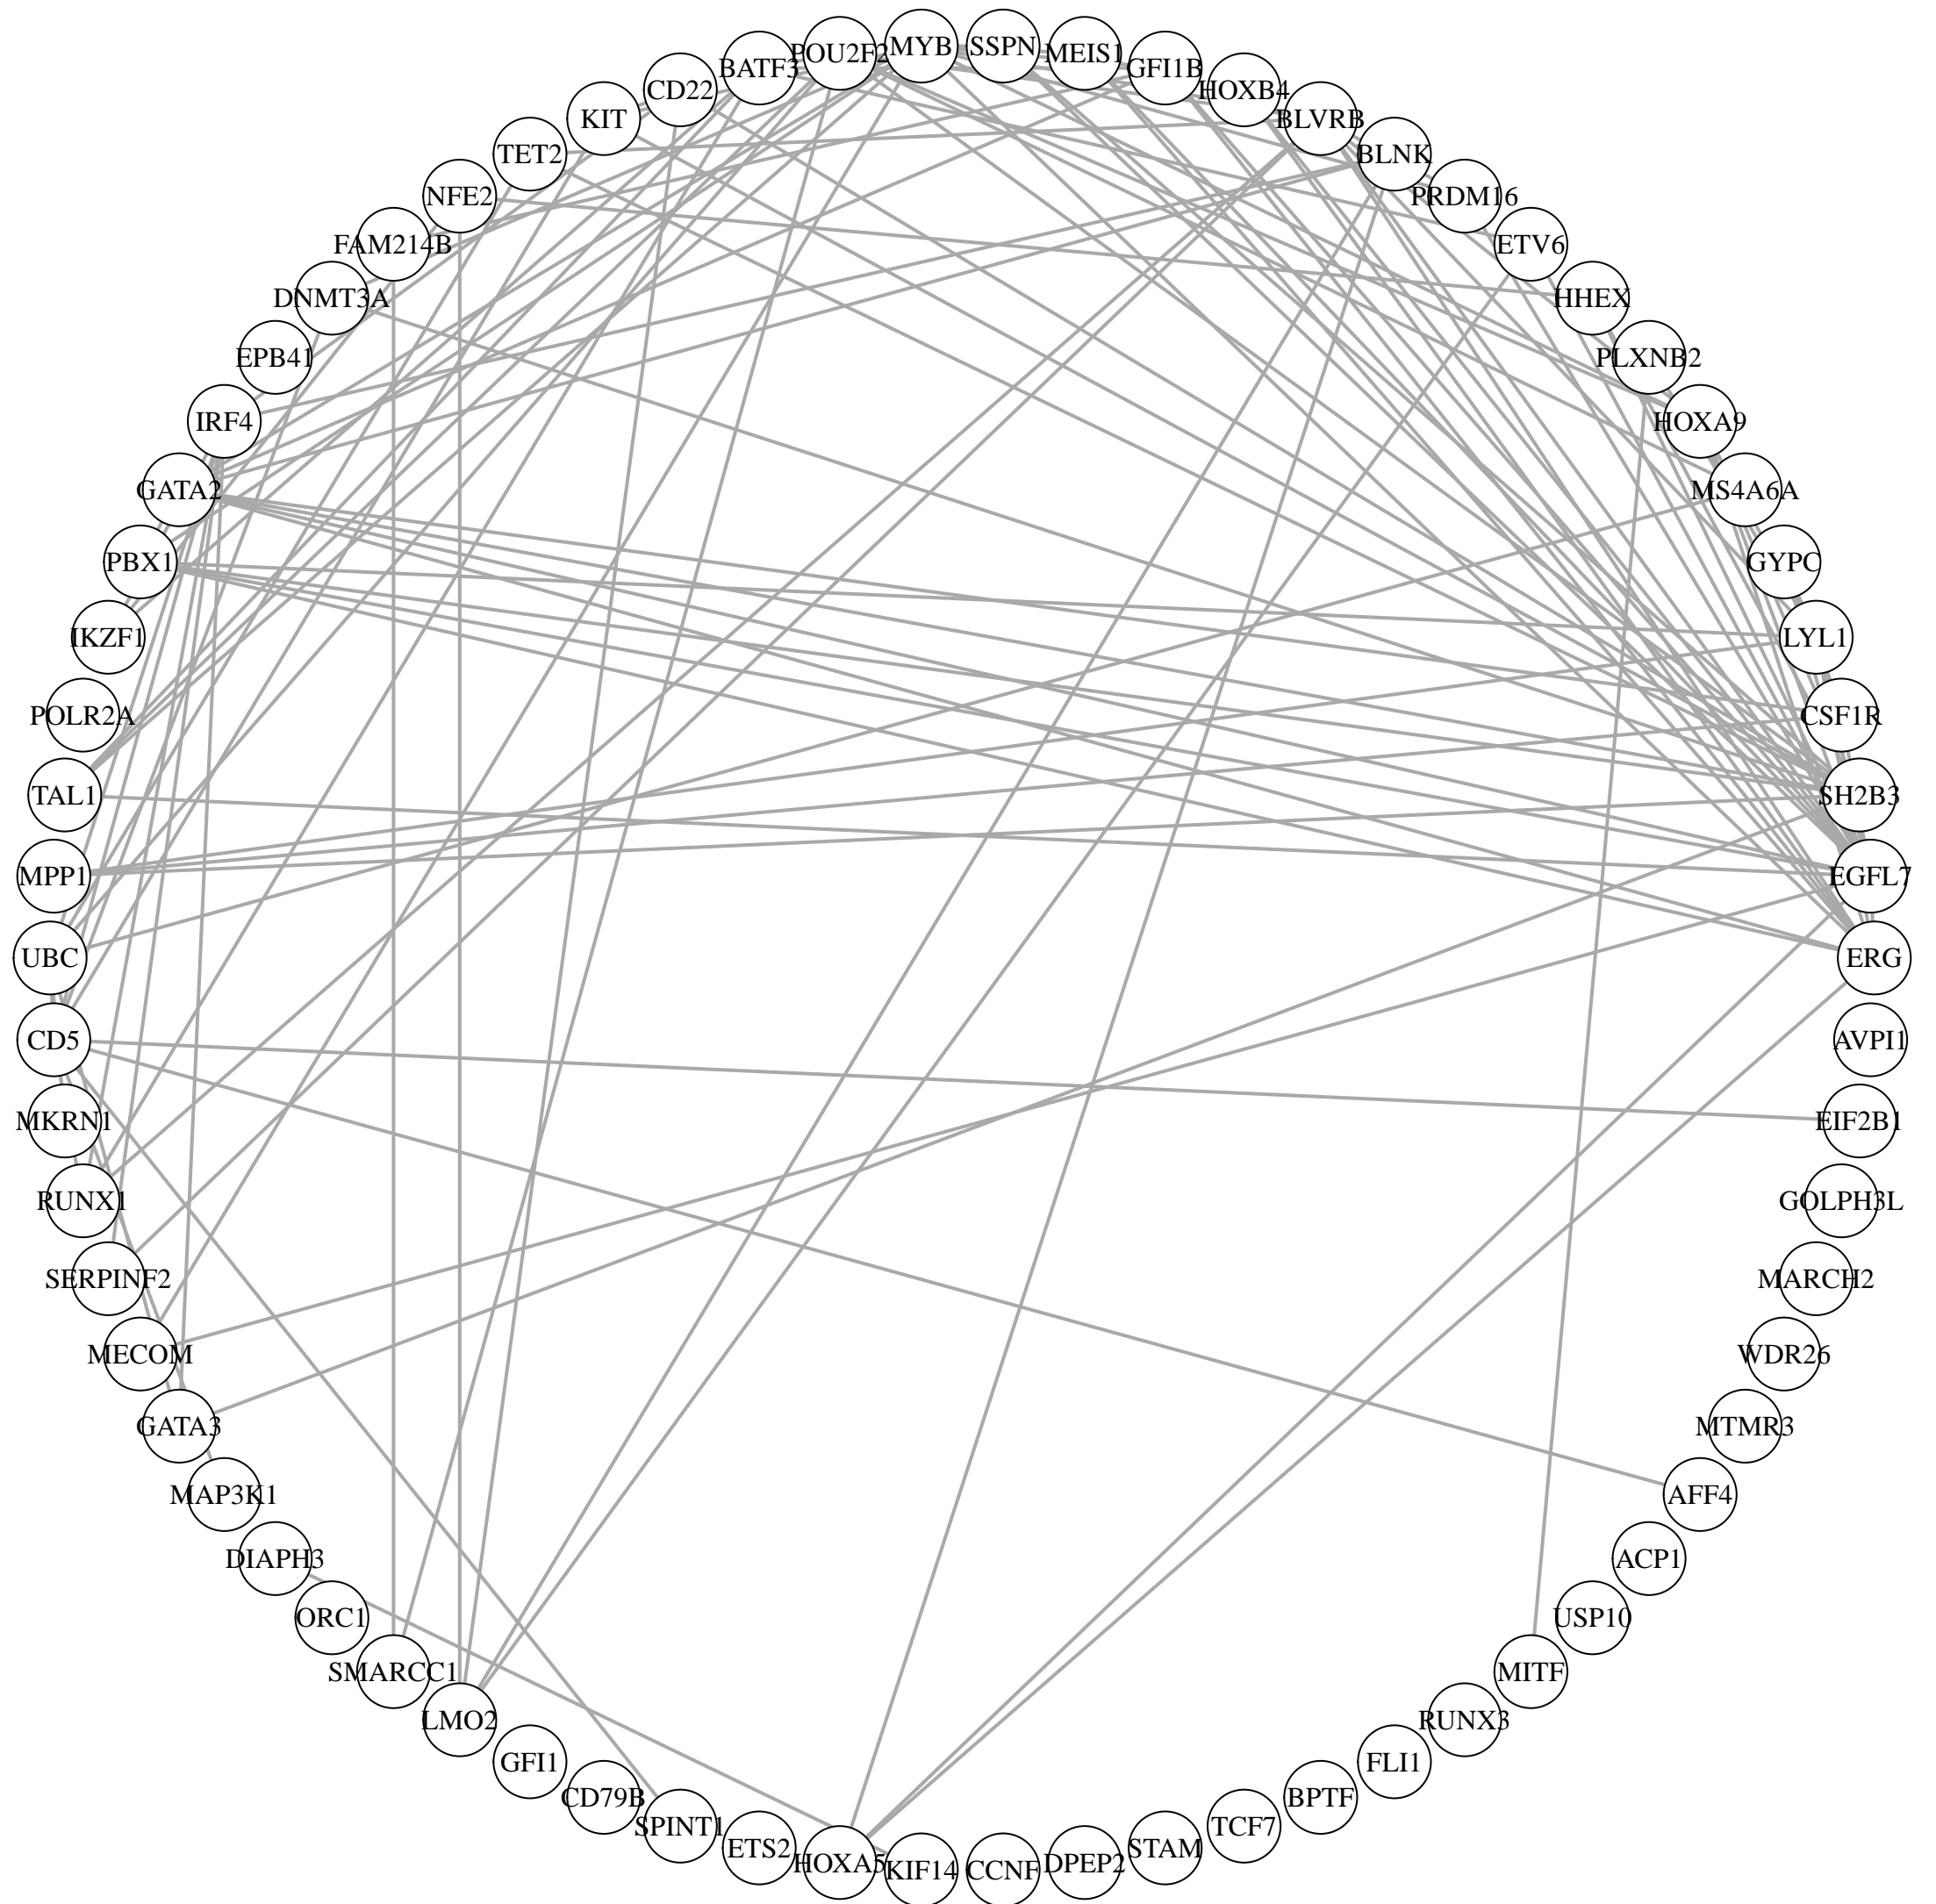

human\_HSCtoGMP\_time 24

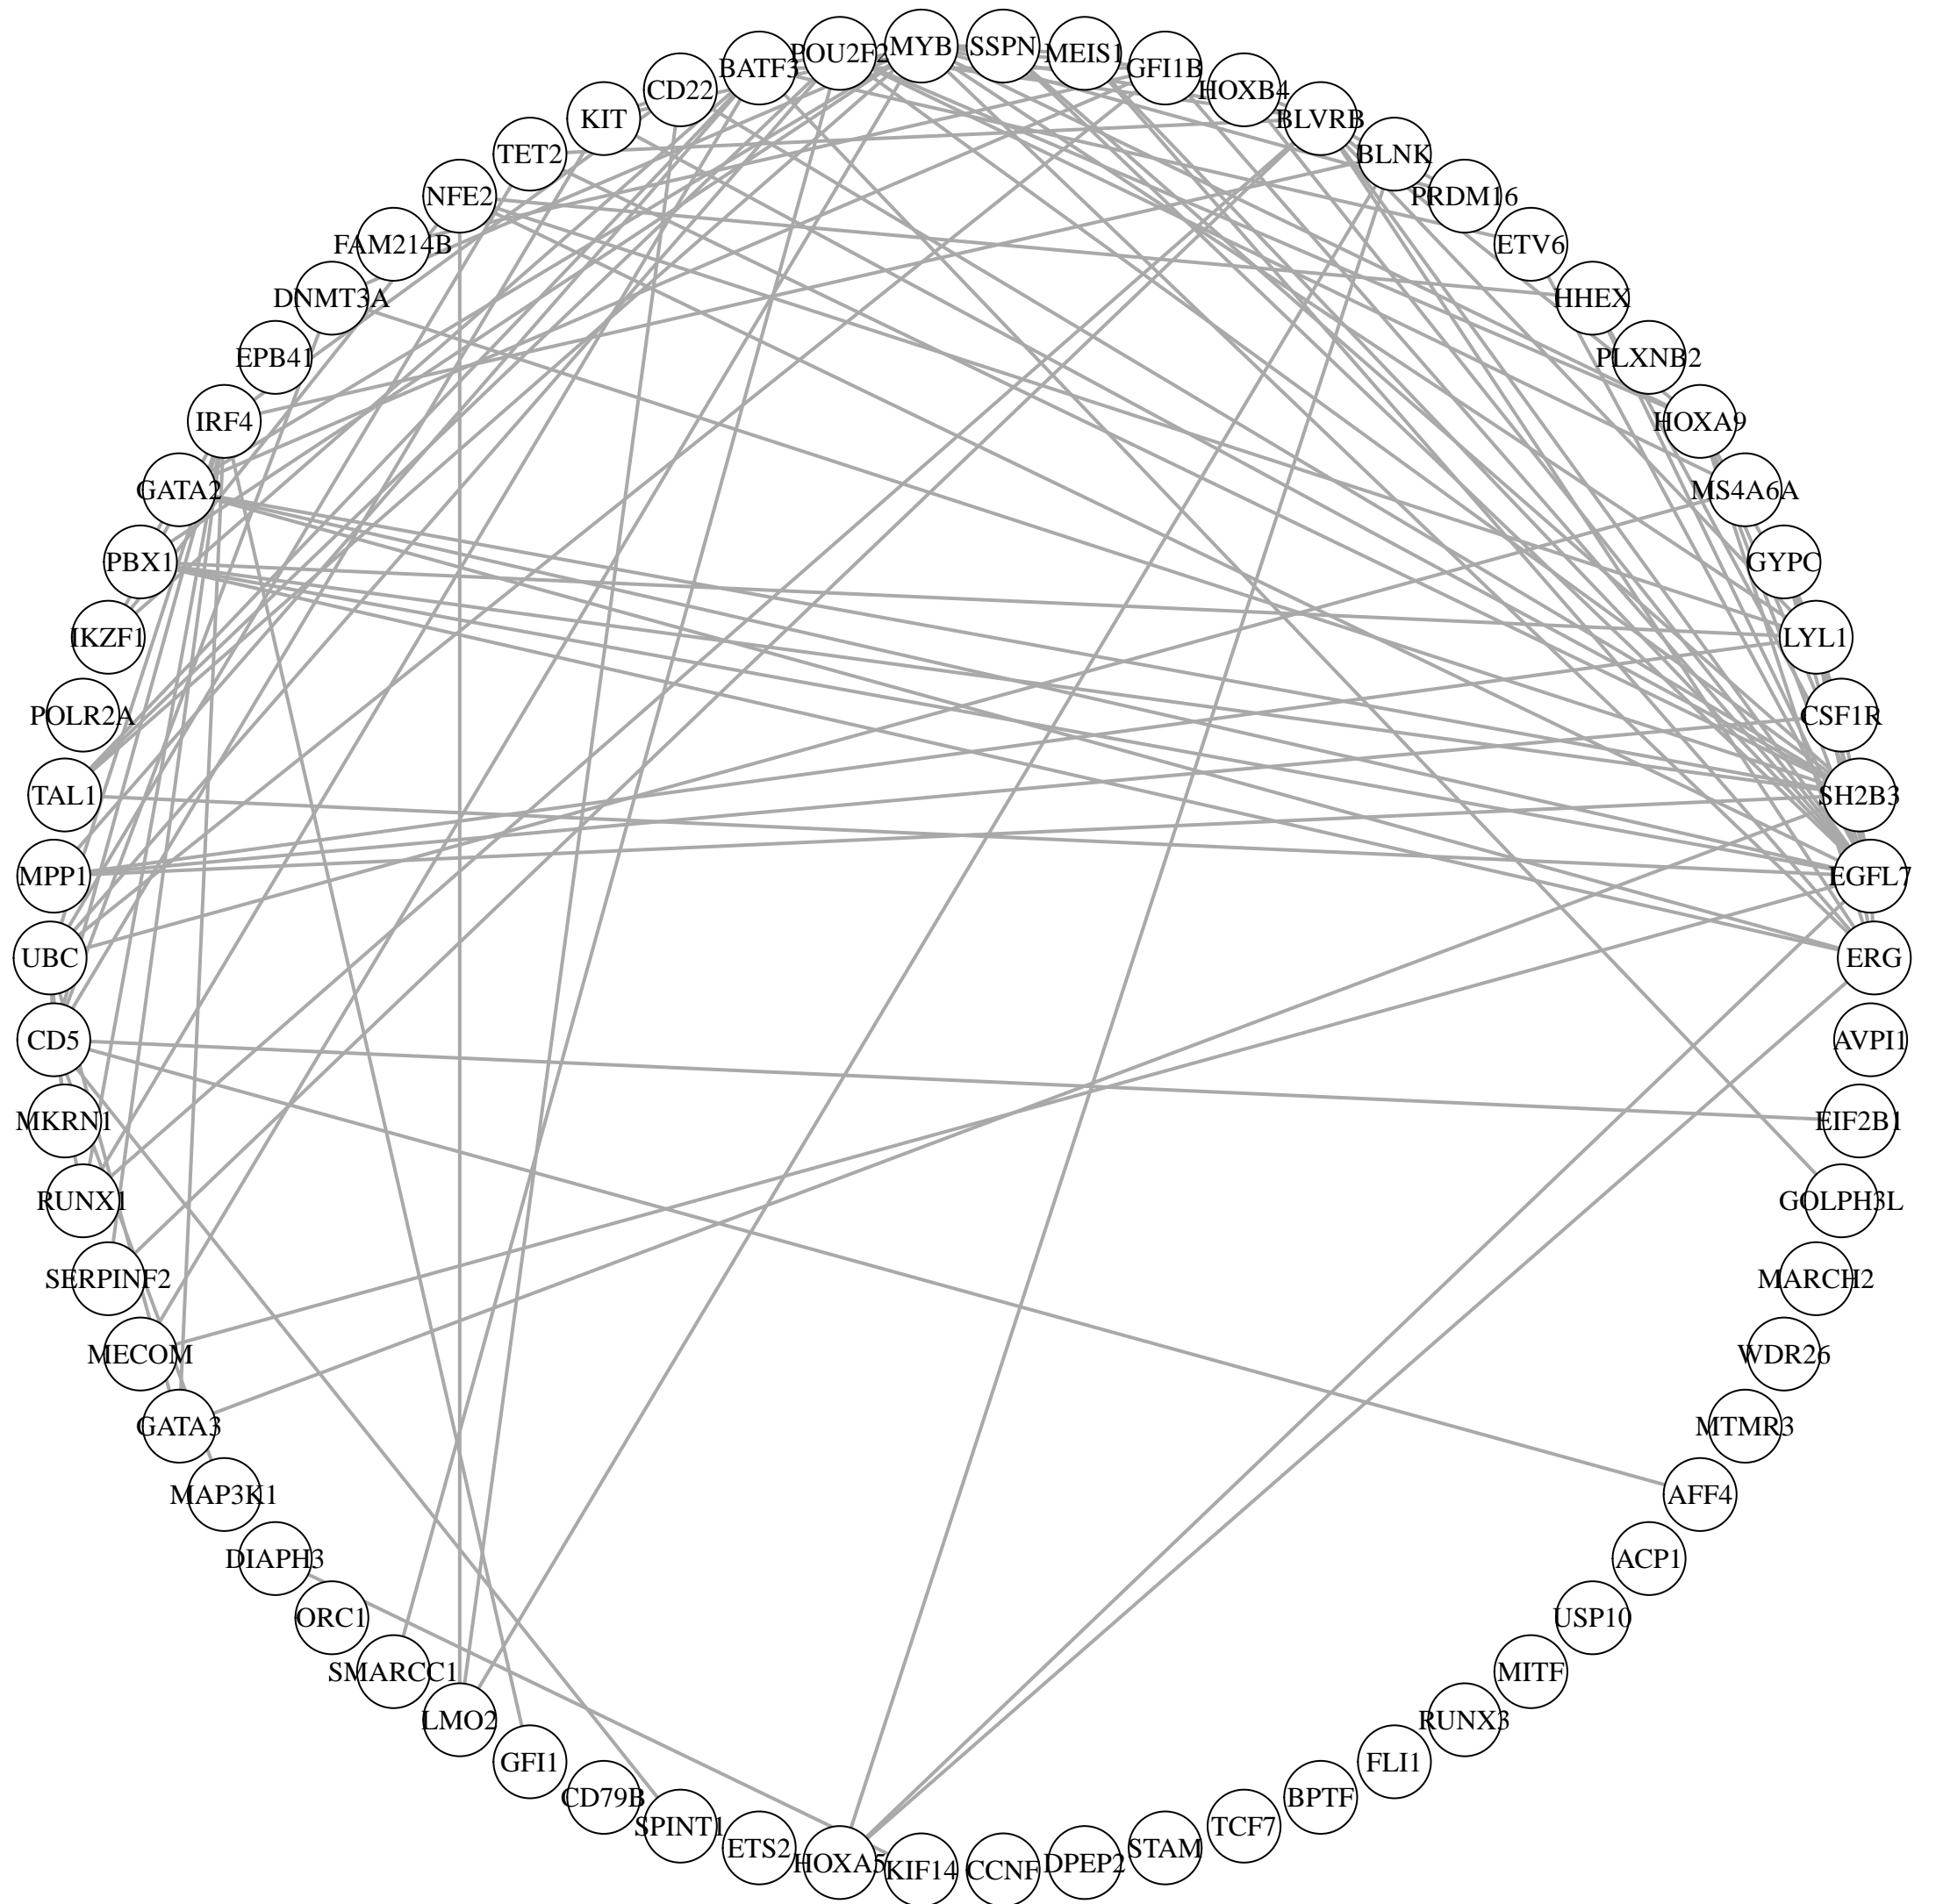

human\_HSCtoGMP\_time 25

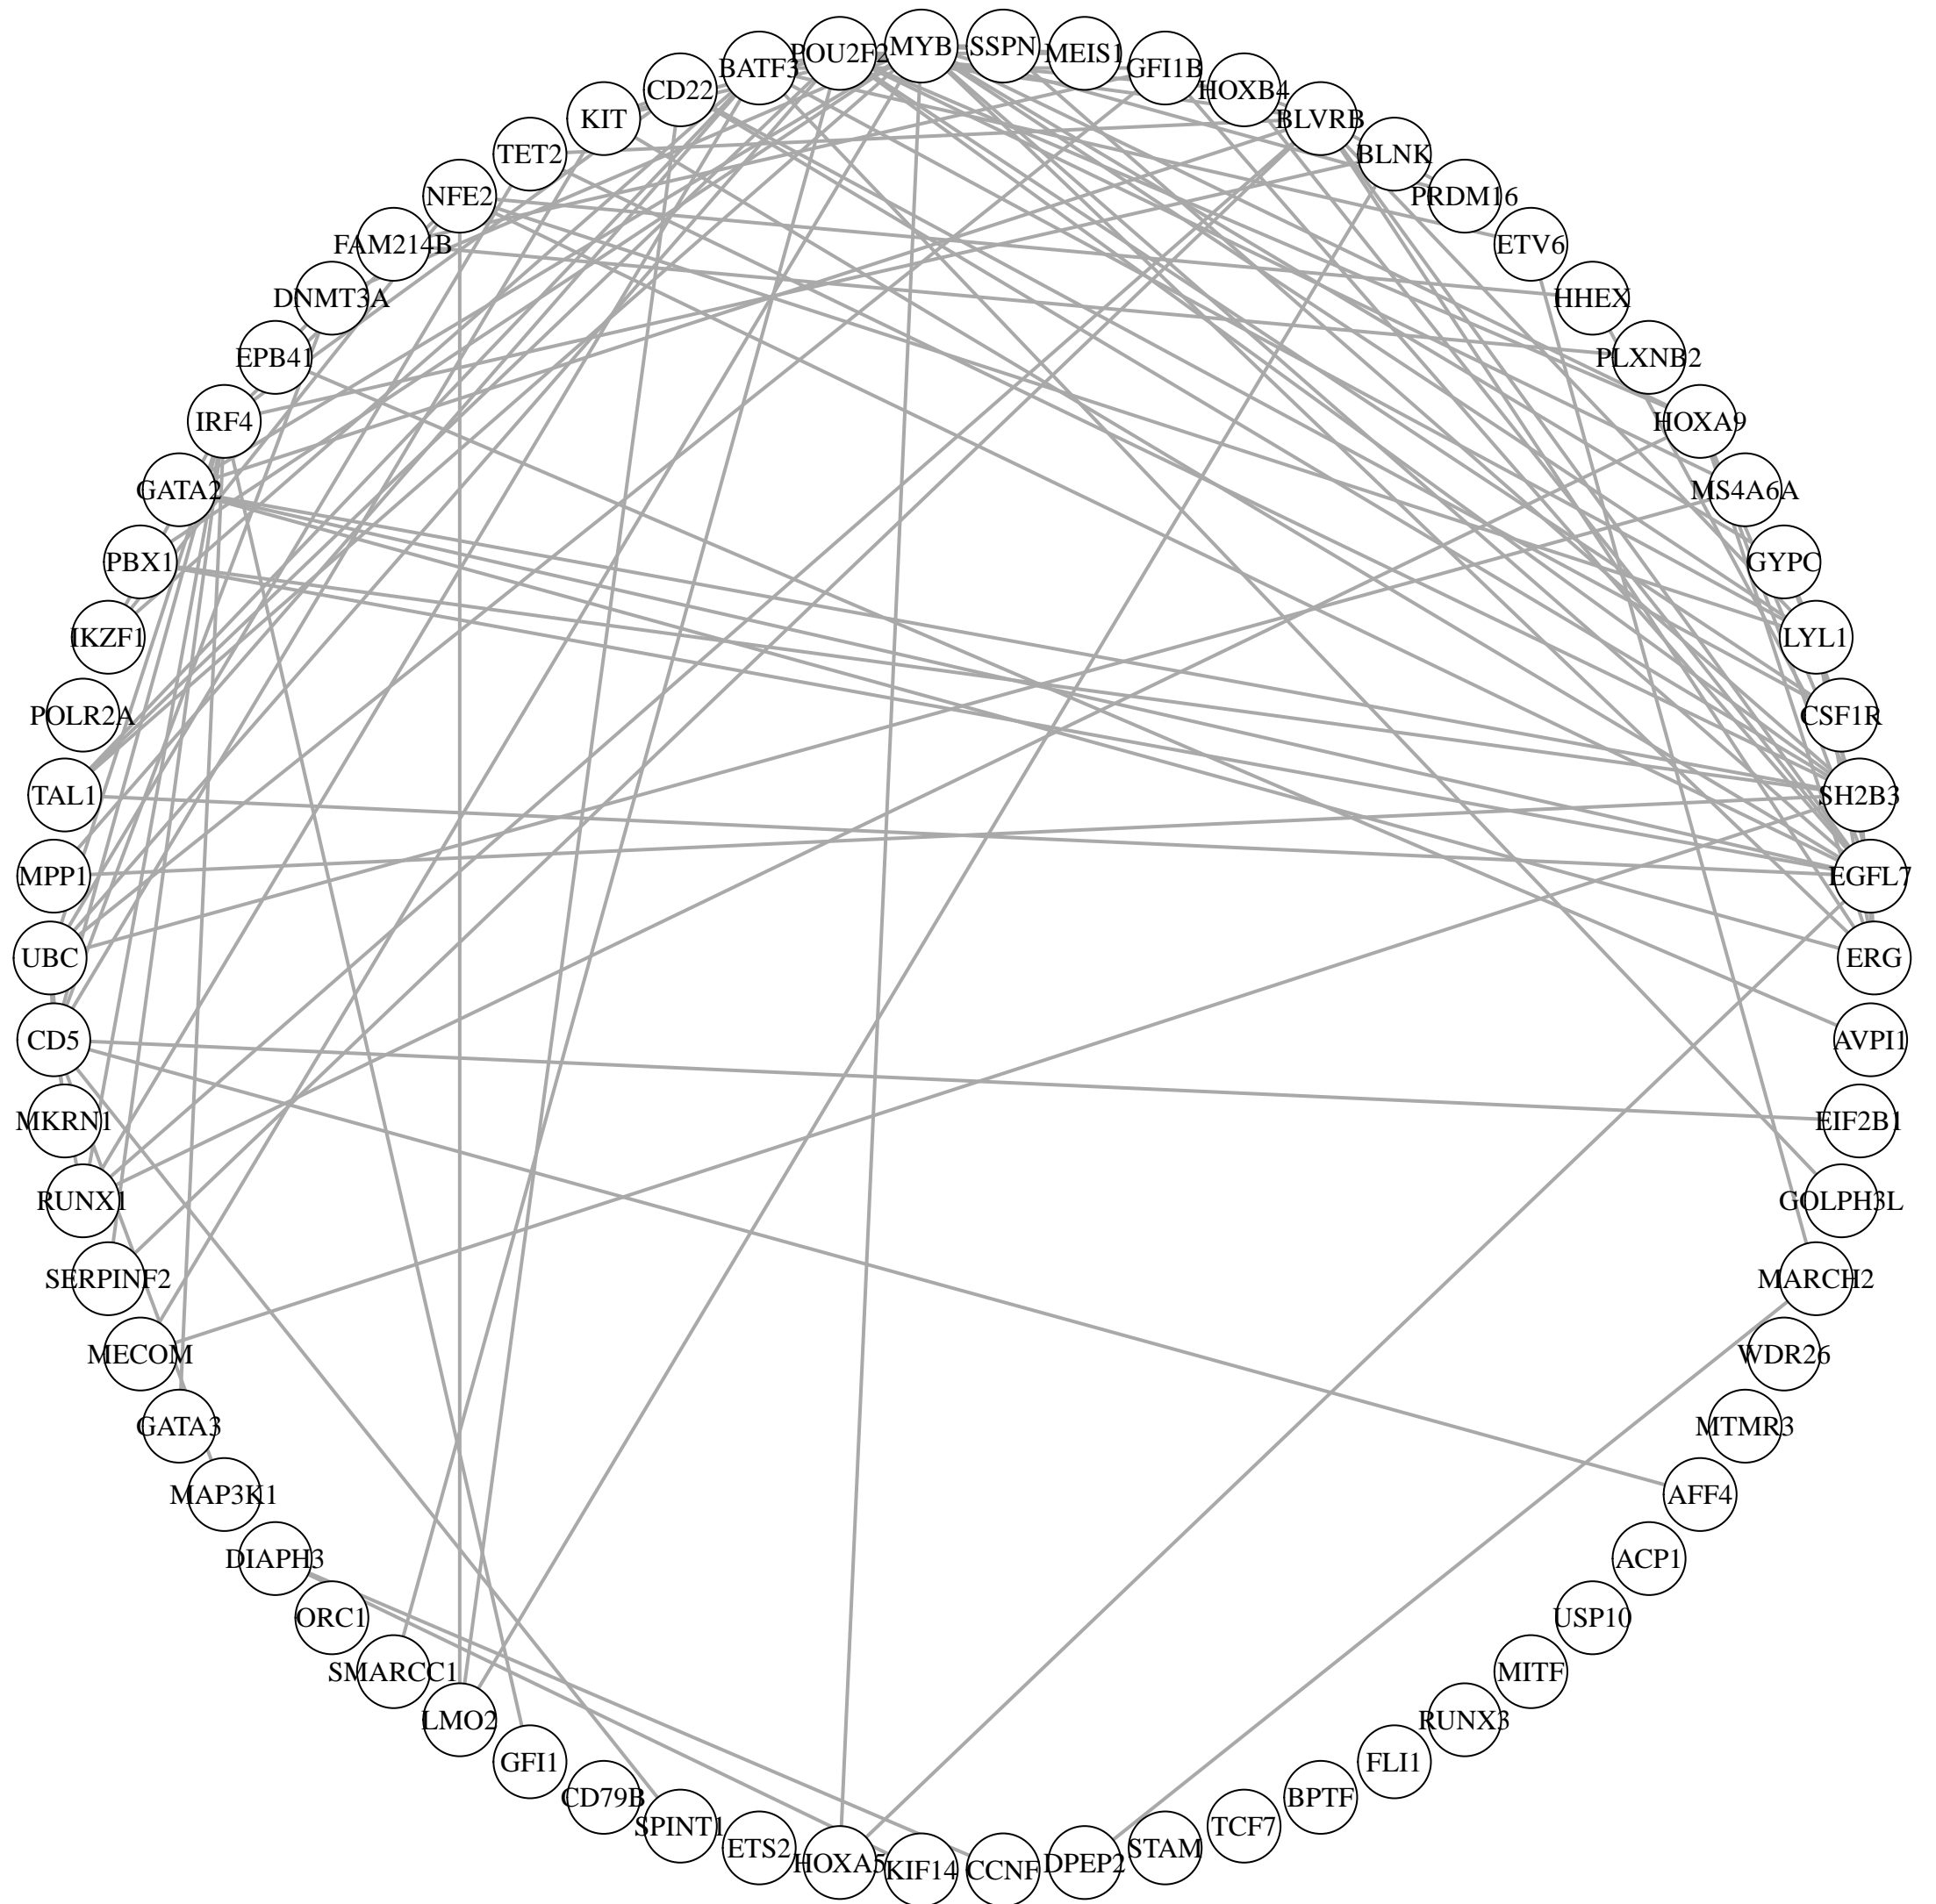

human\_HSCtoLMPP\_time 1

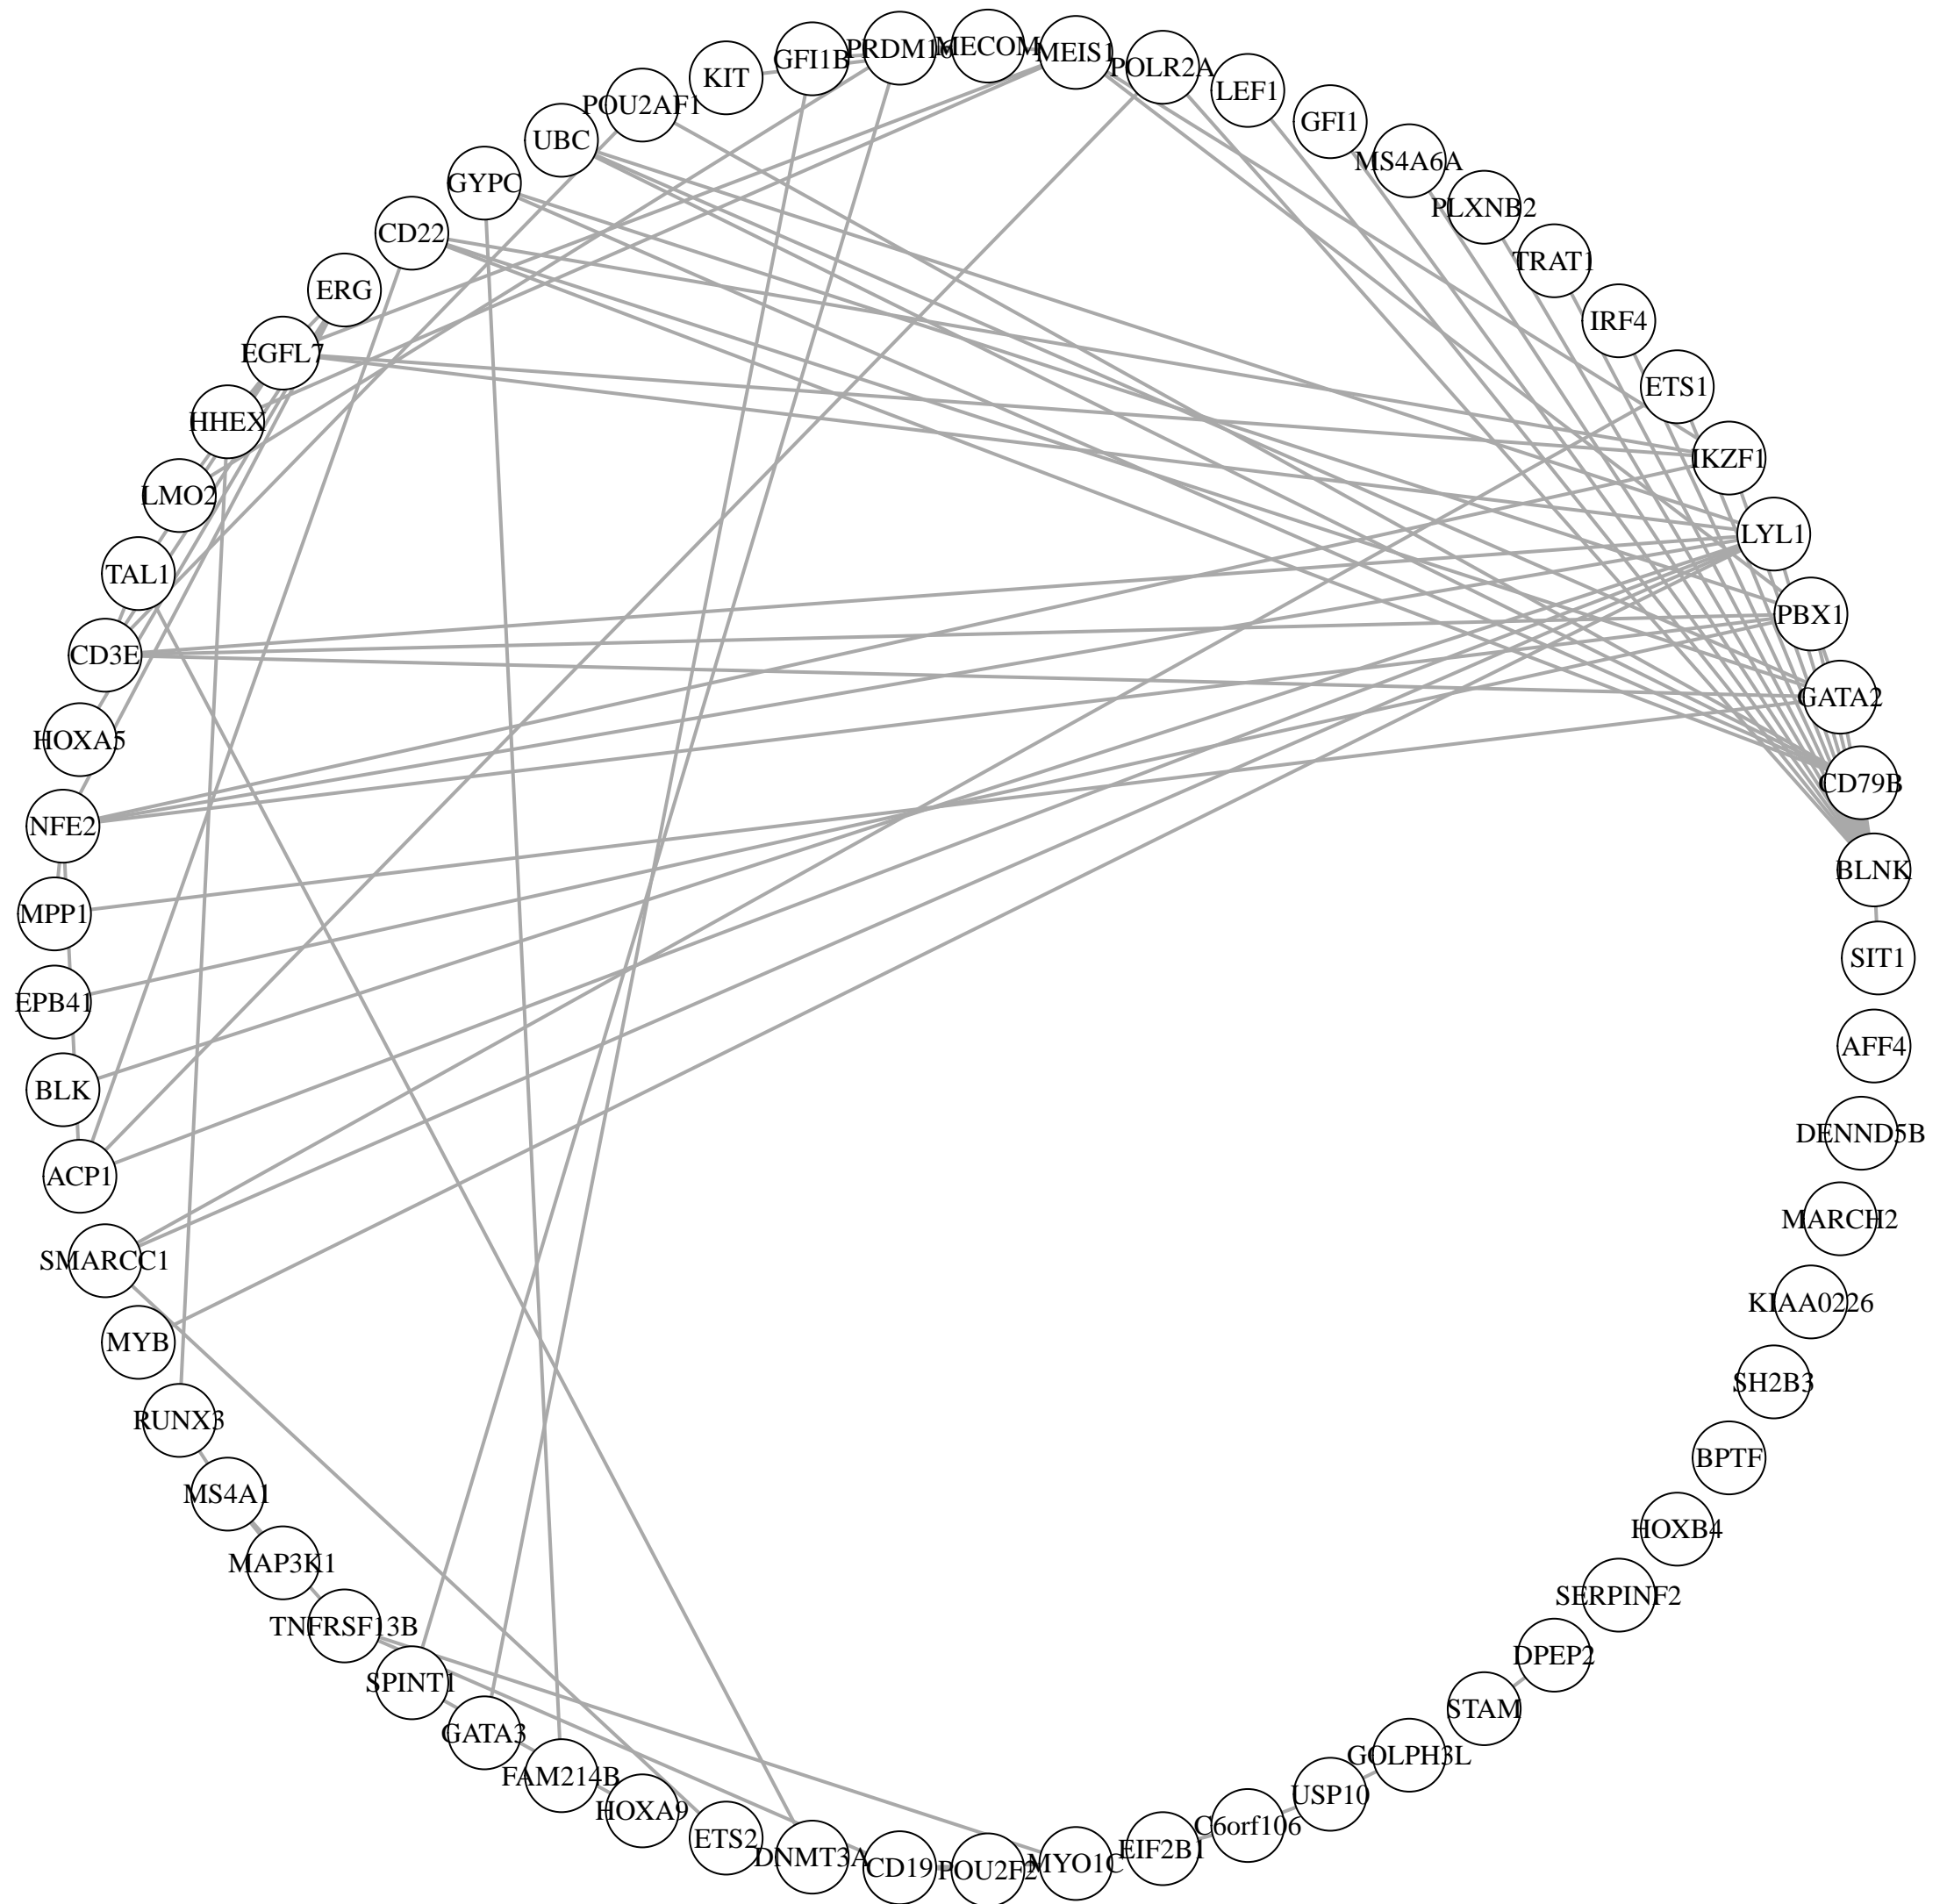

human\_HSCtoLMPP\_time 2

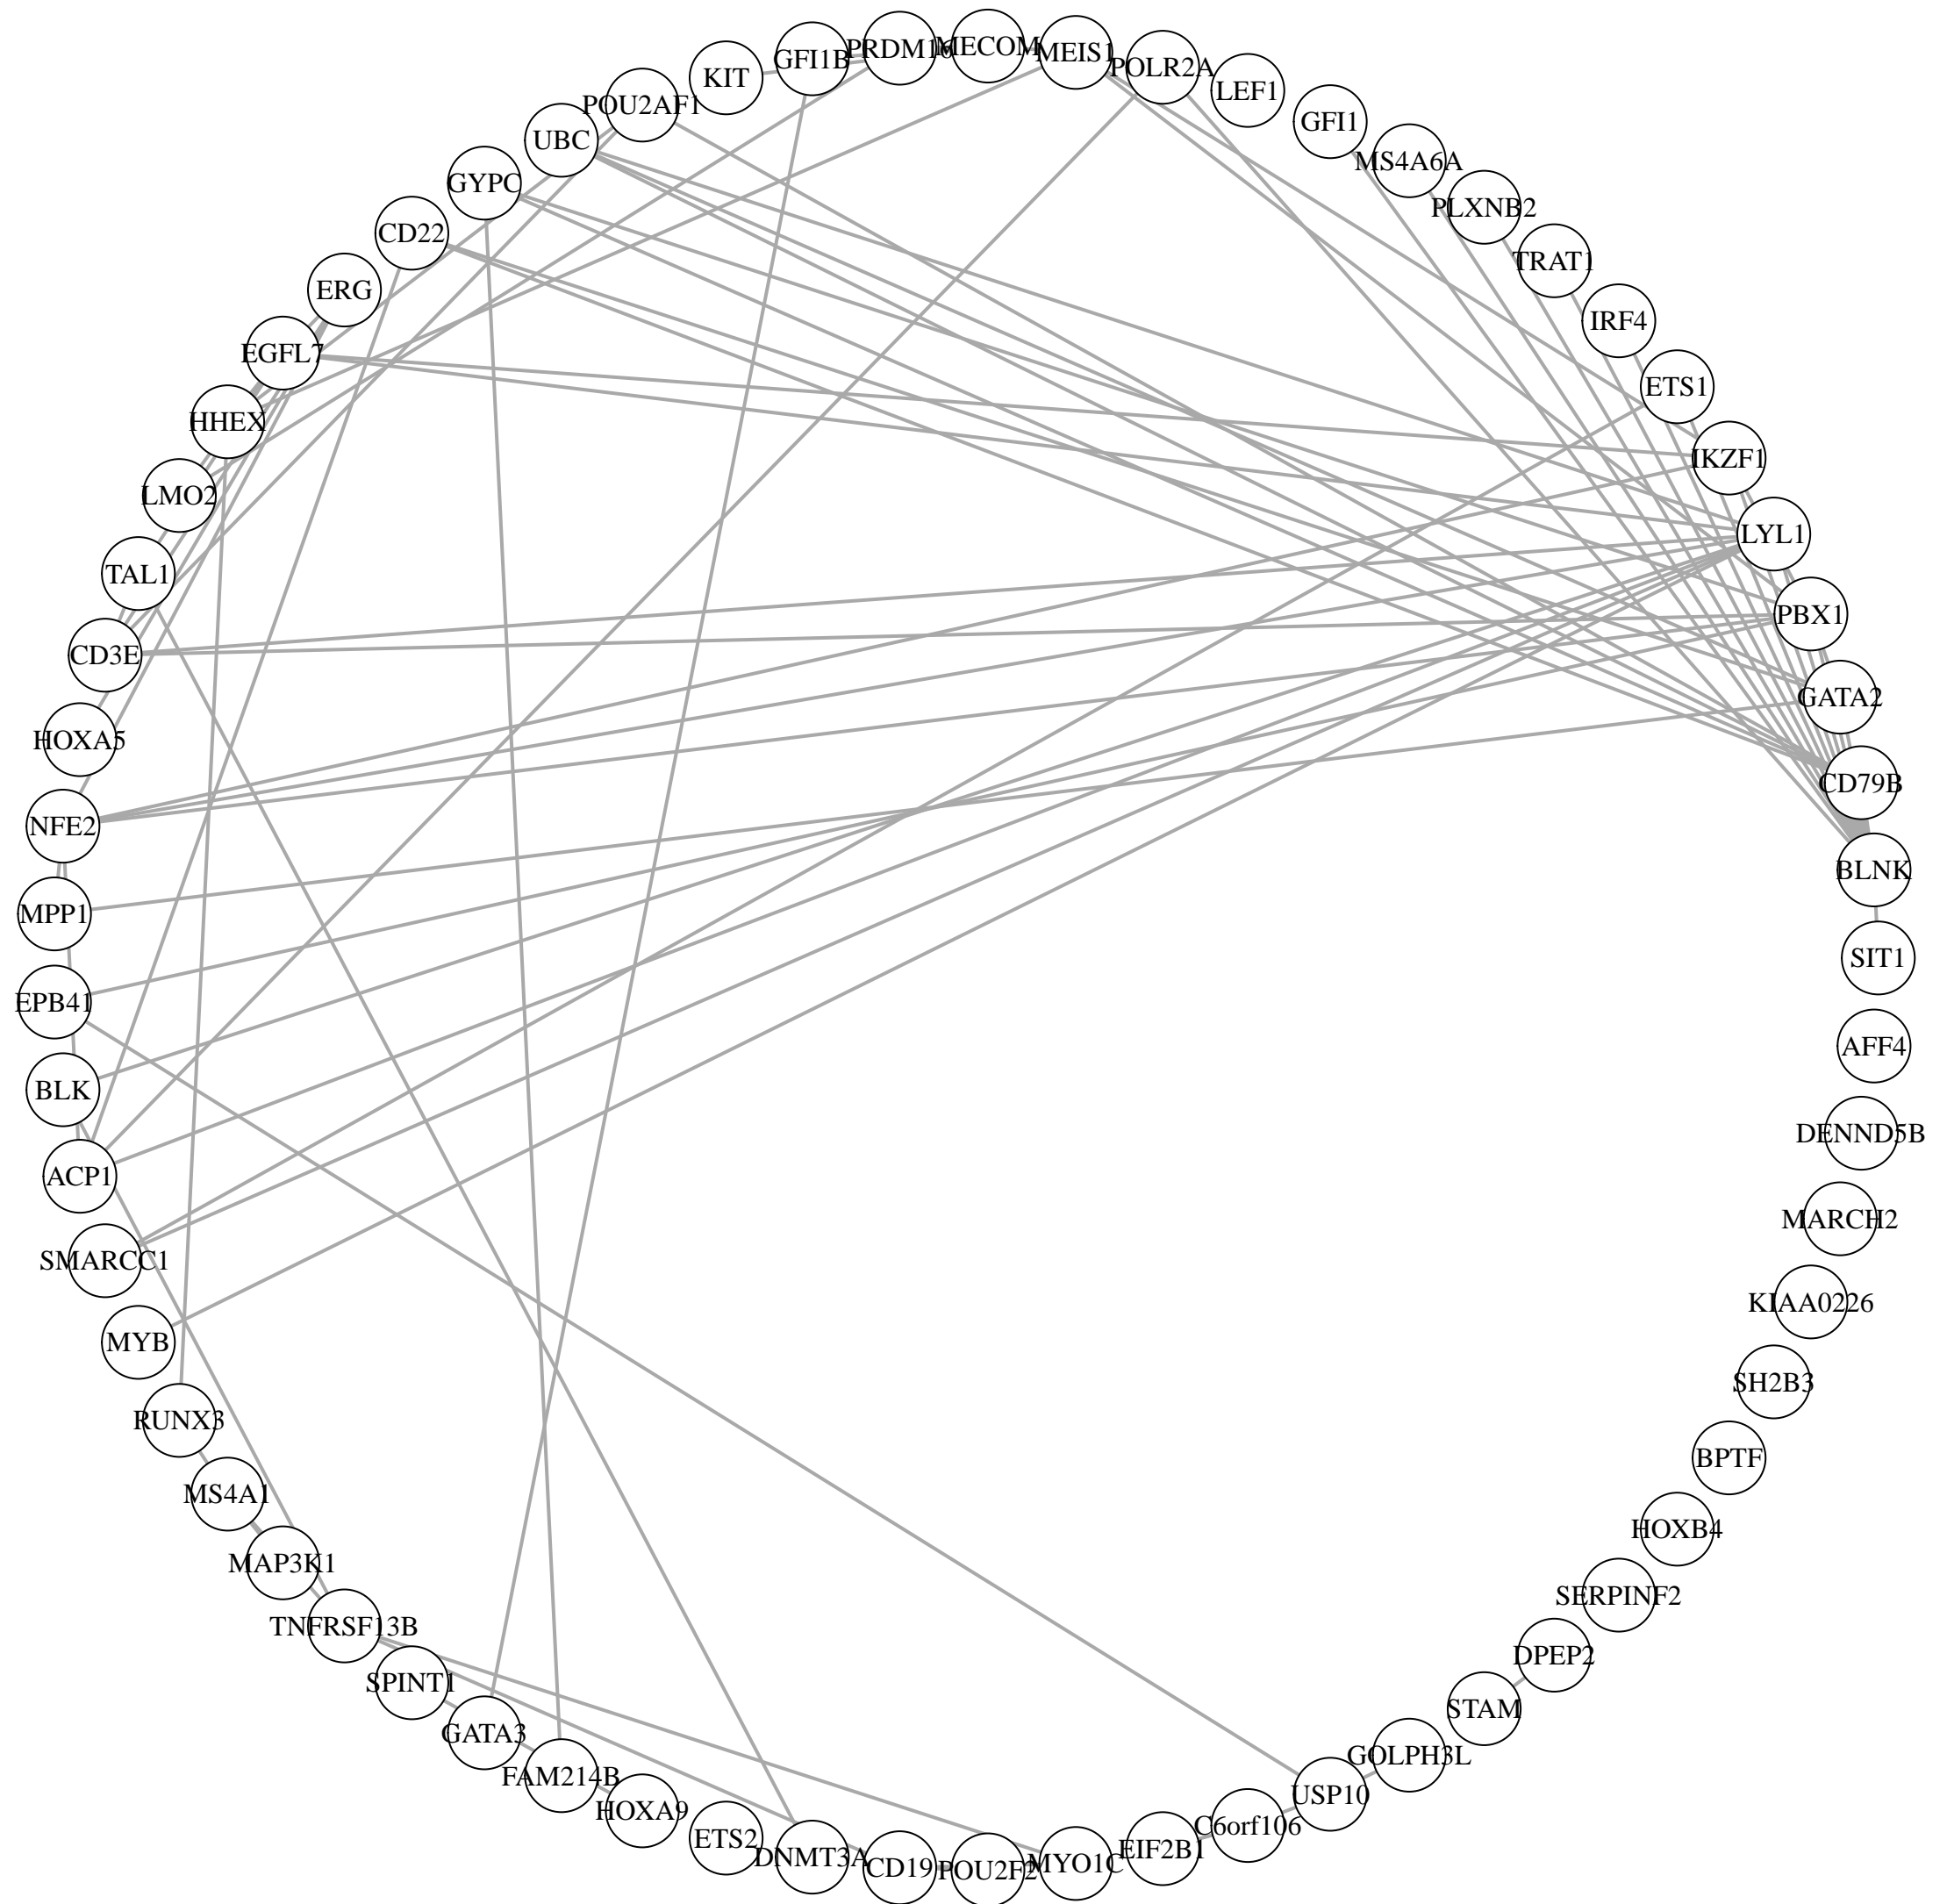

human\_HSCtoLMPP\_time 3

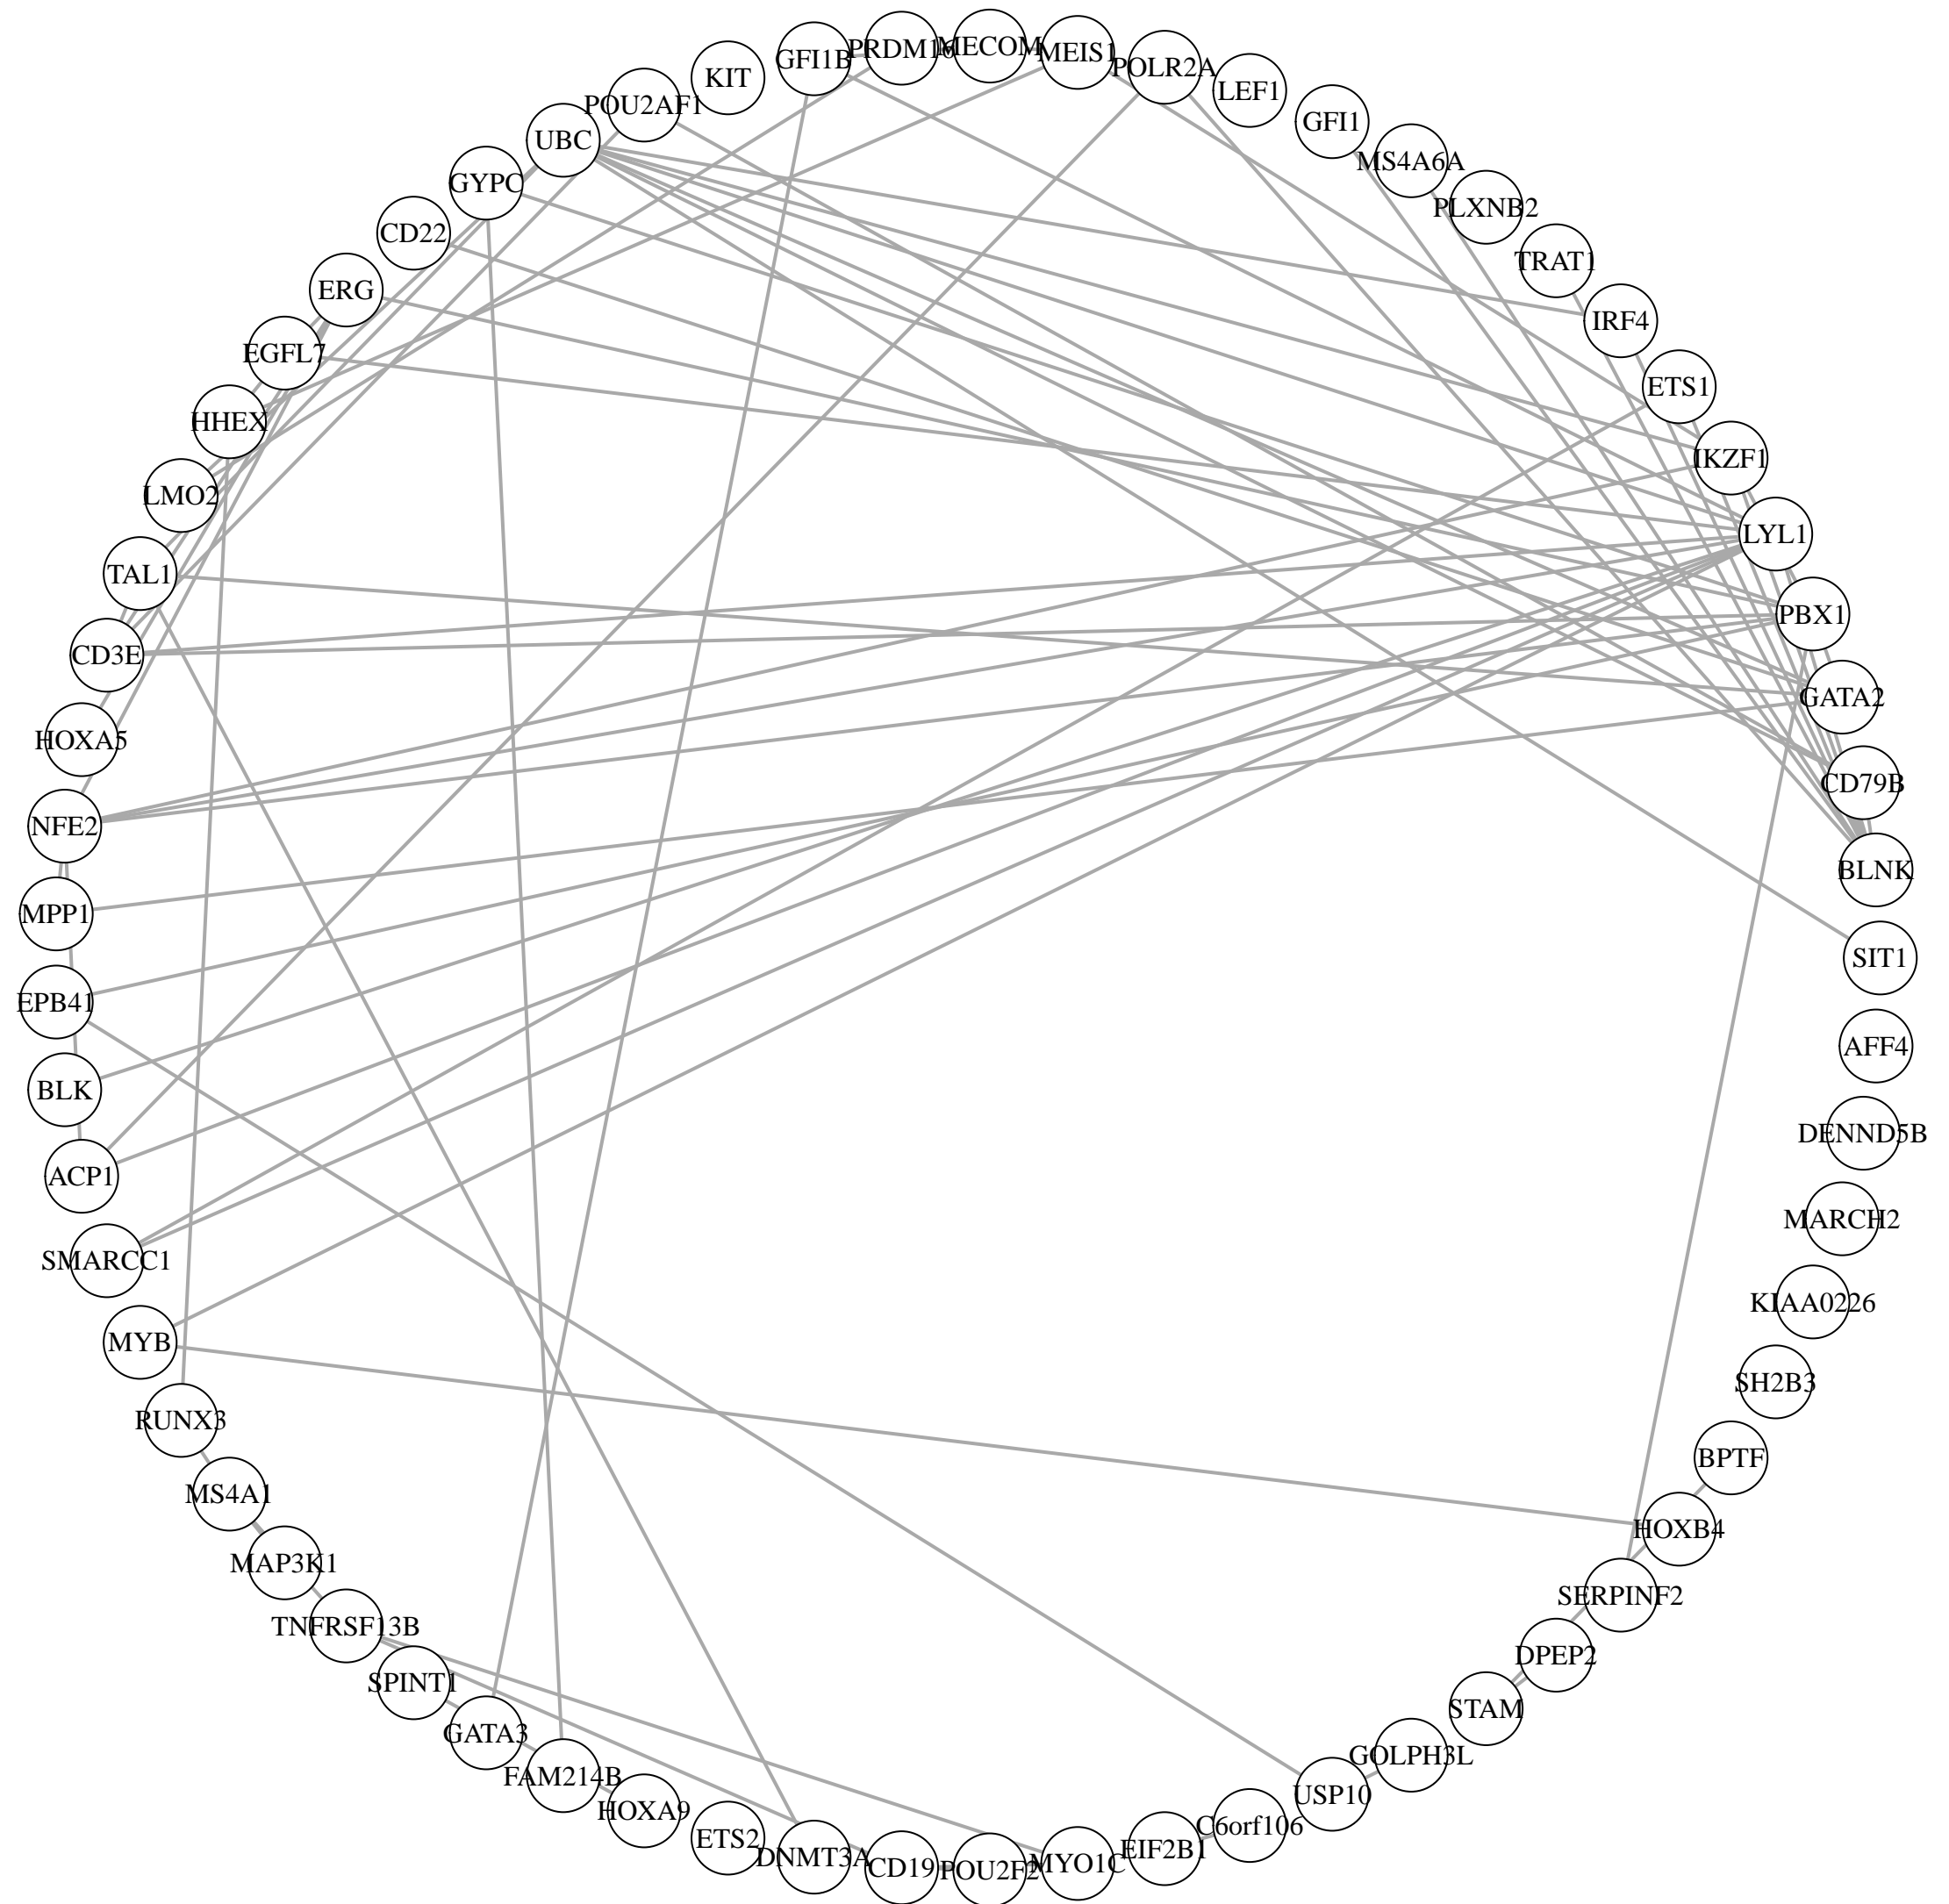



human\_HSCtoLMPP\_time 4

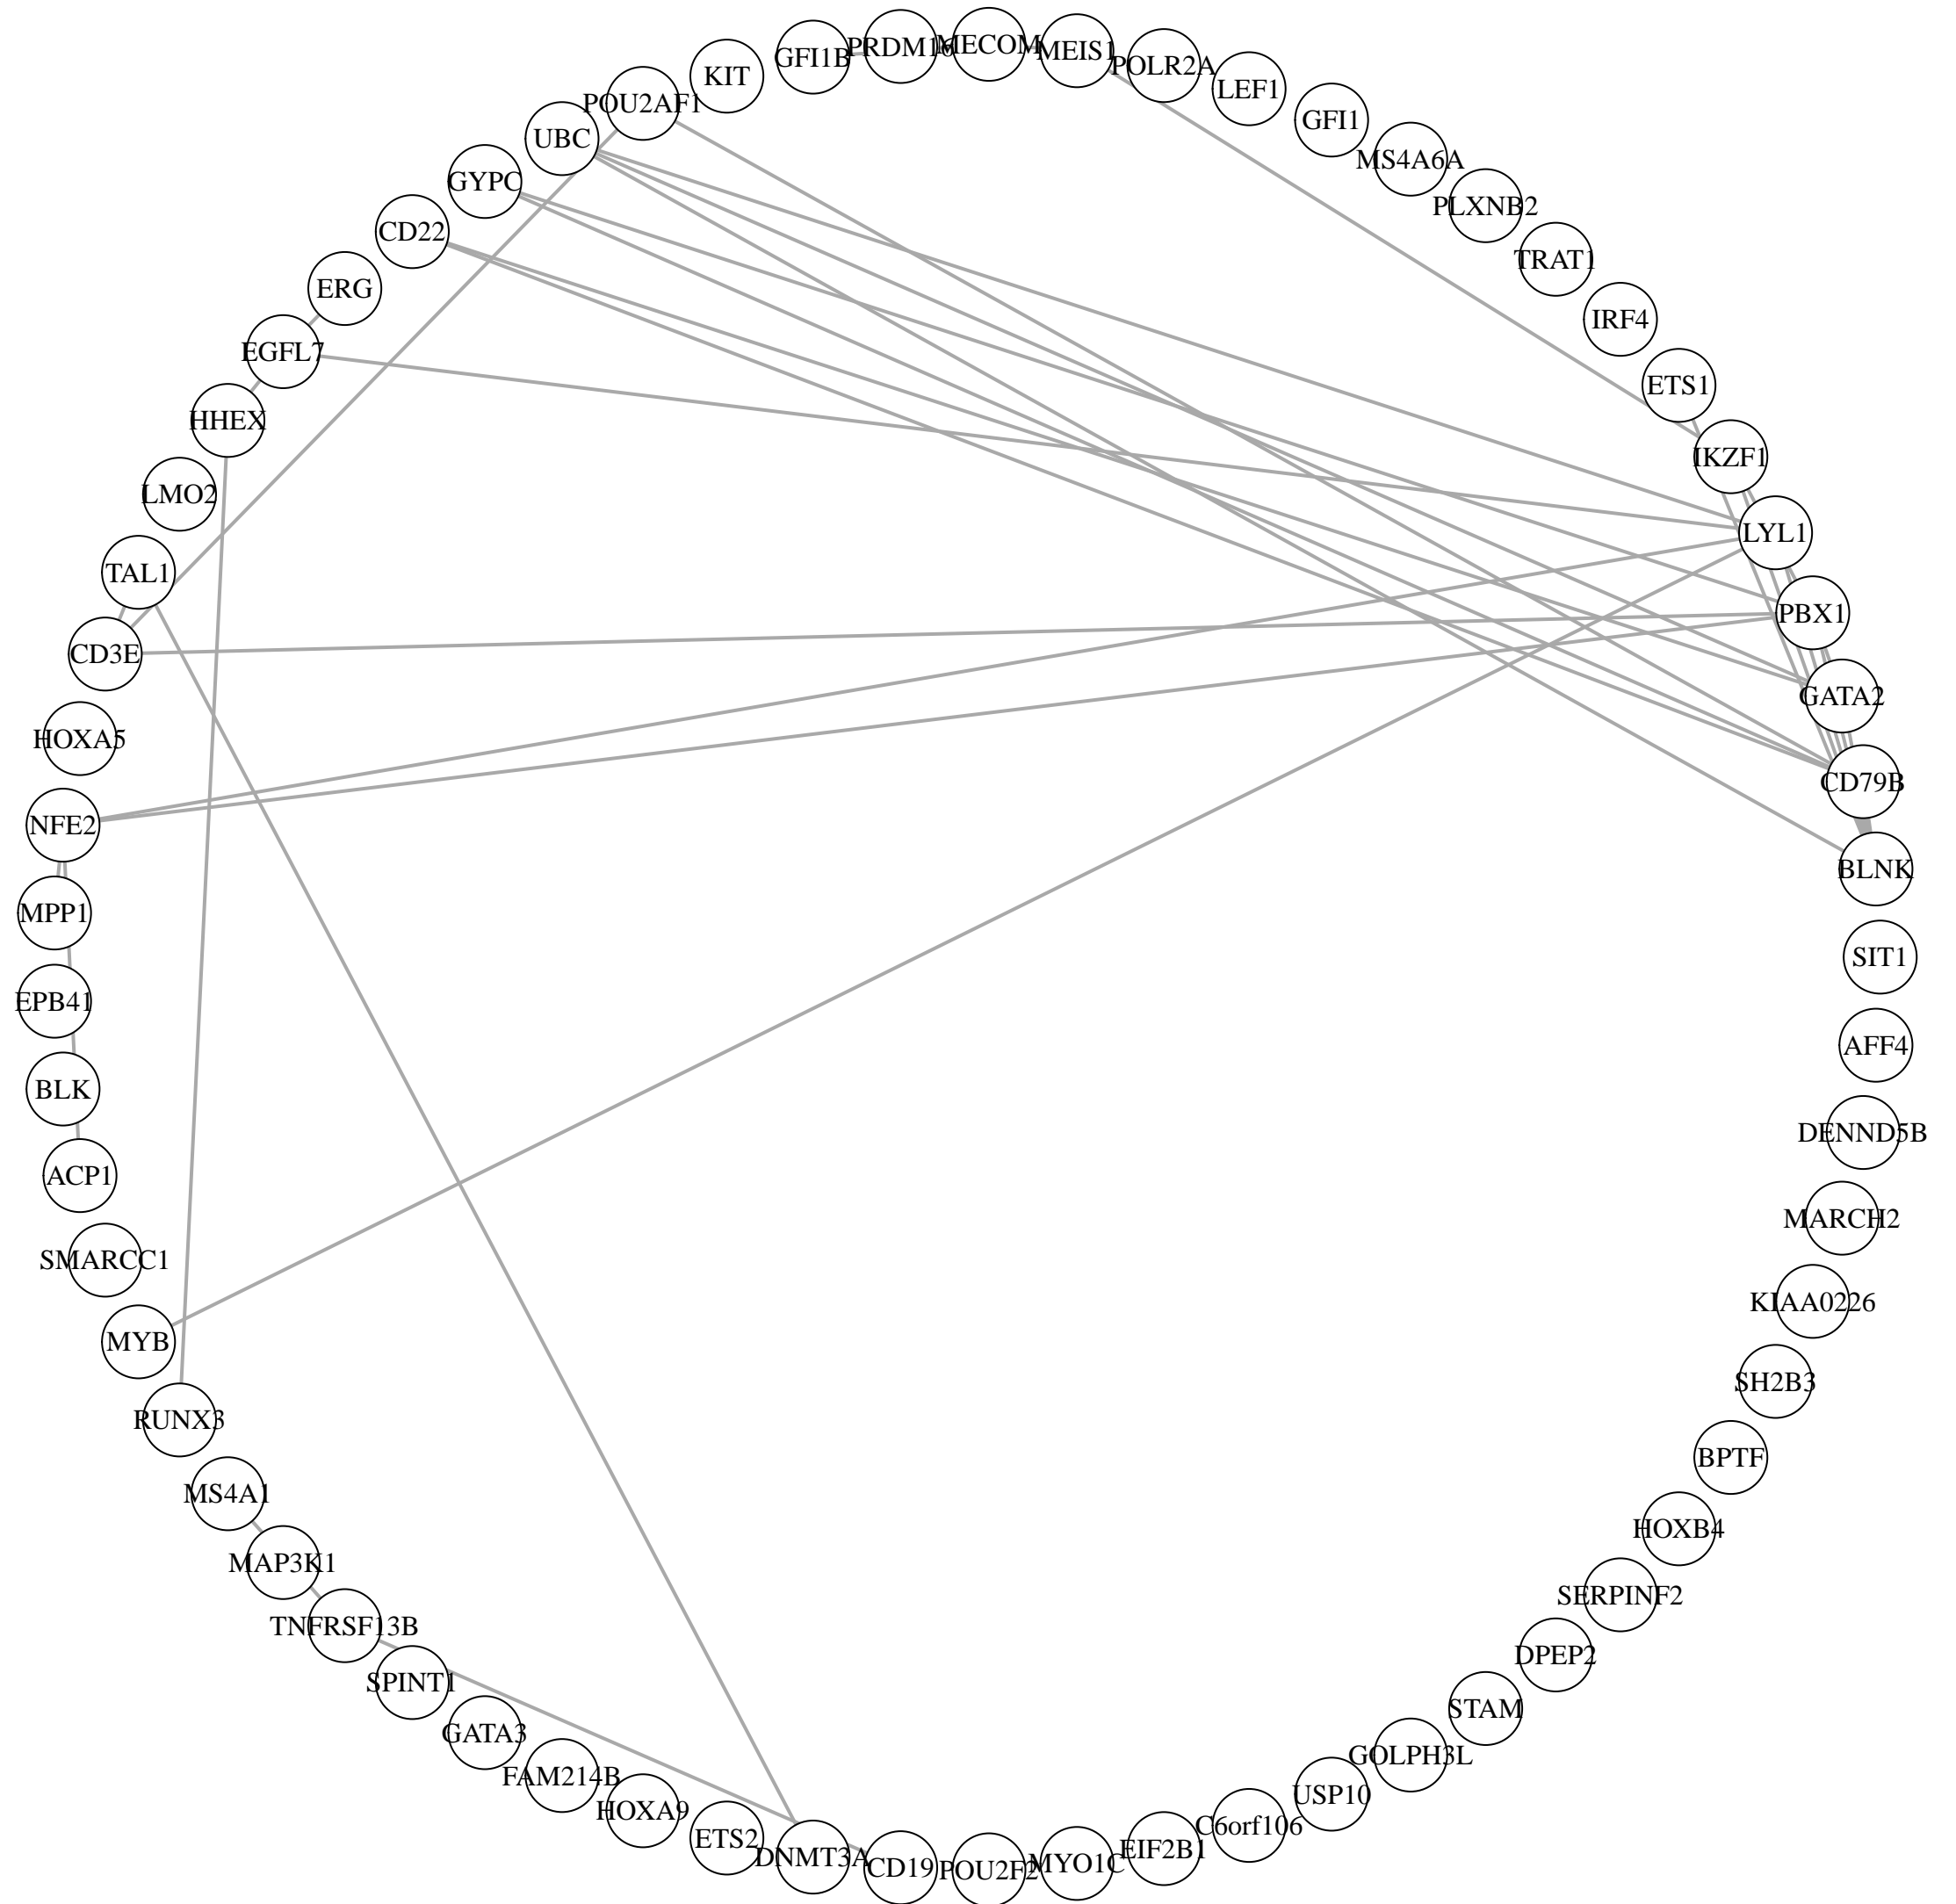

human\_HSCtoLMPP\_time 5

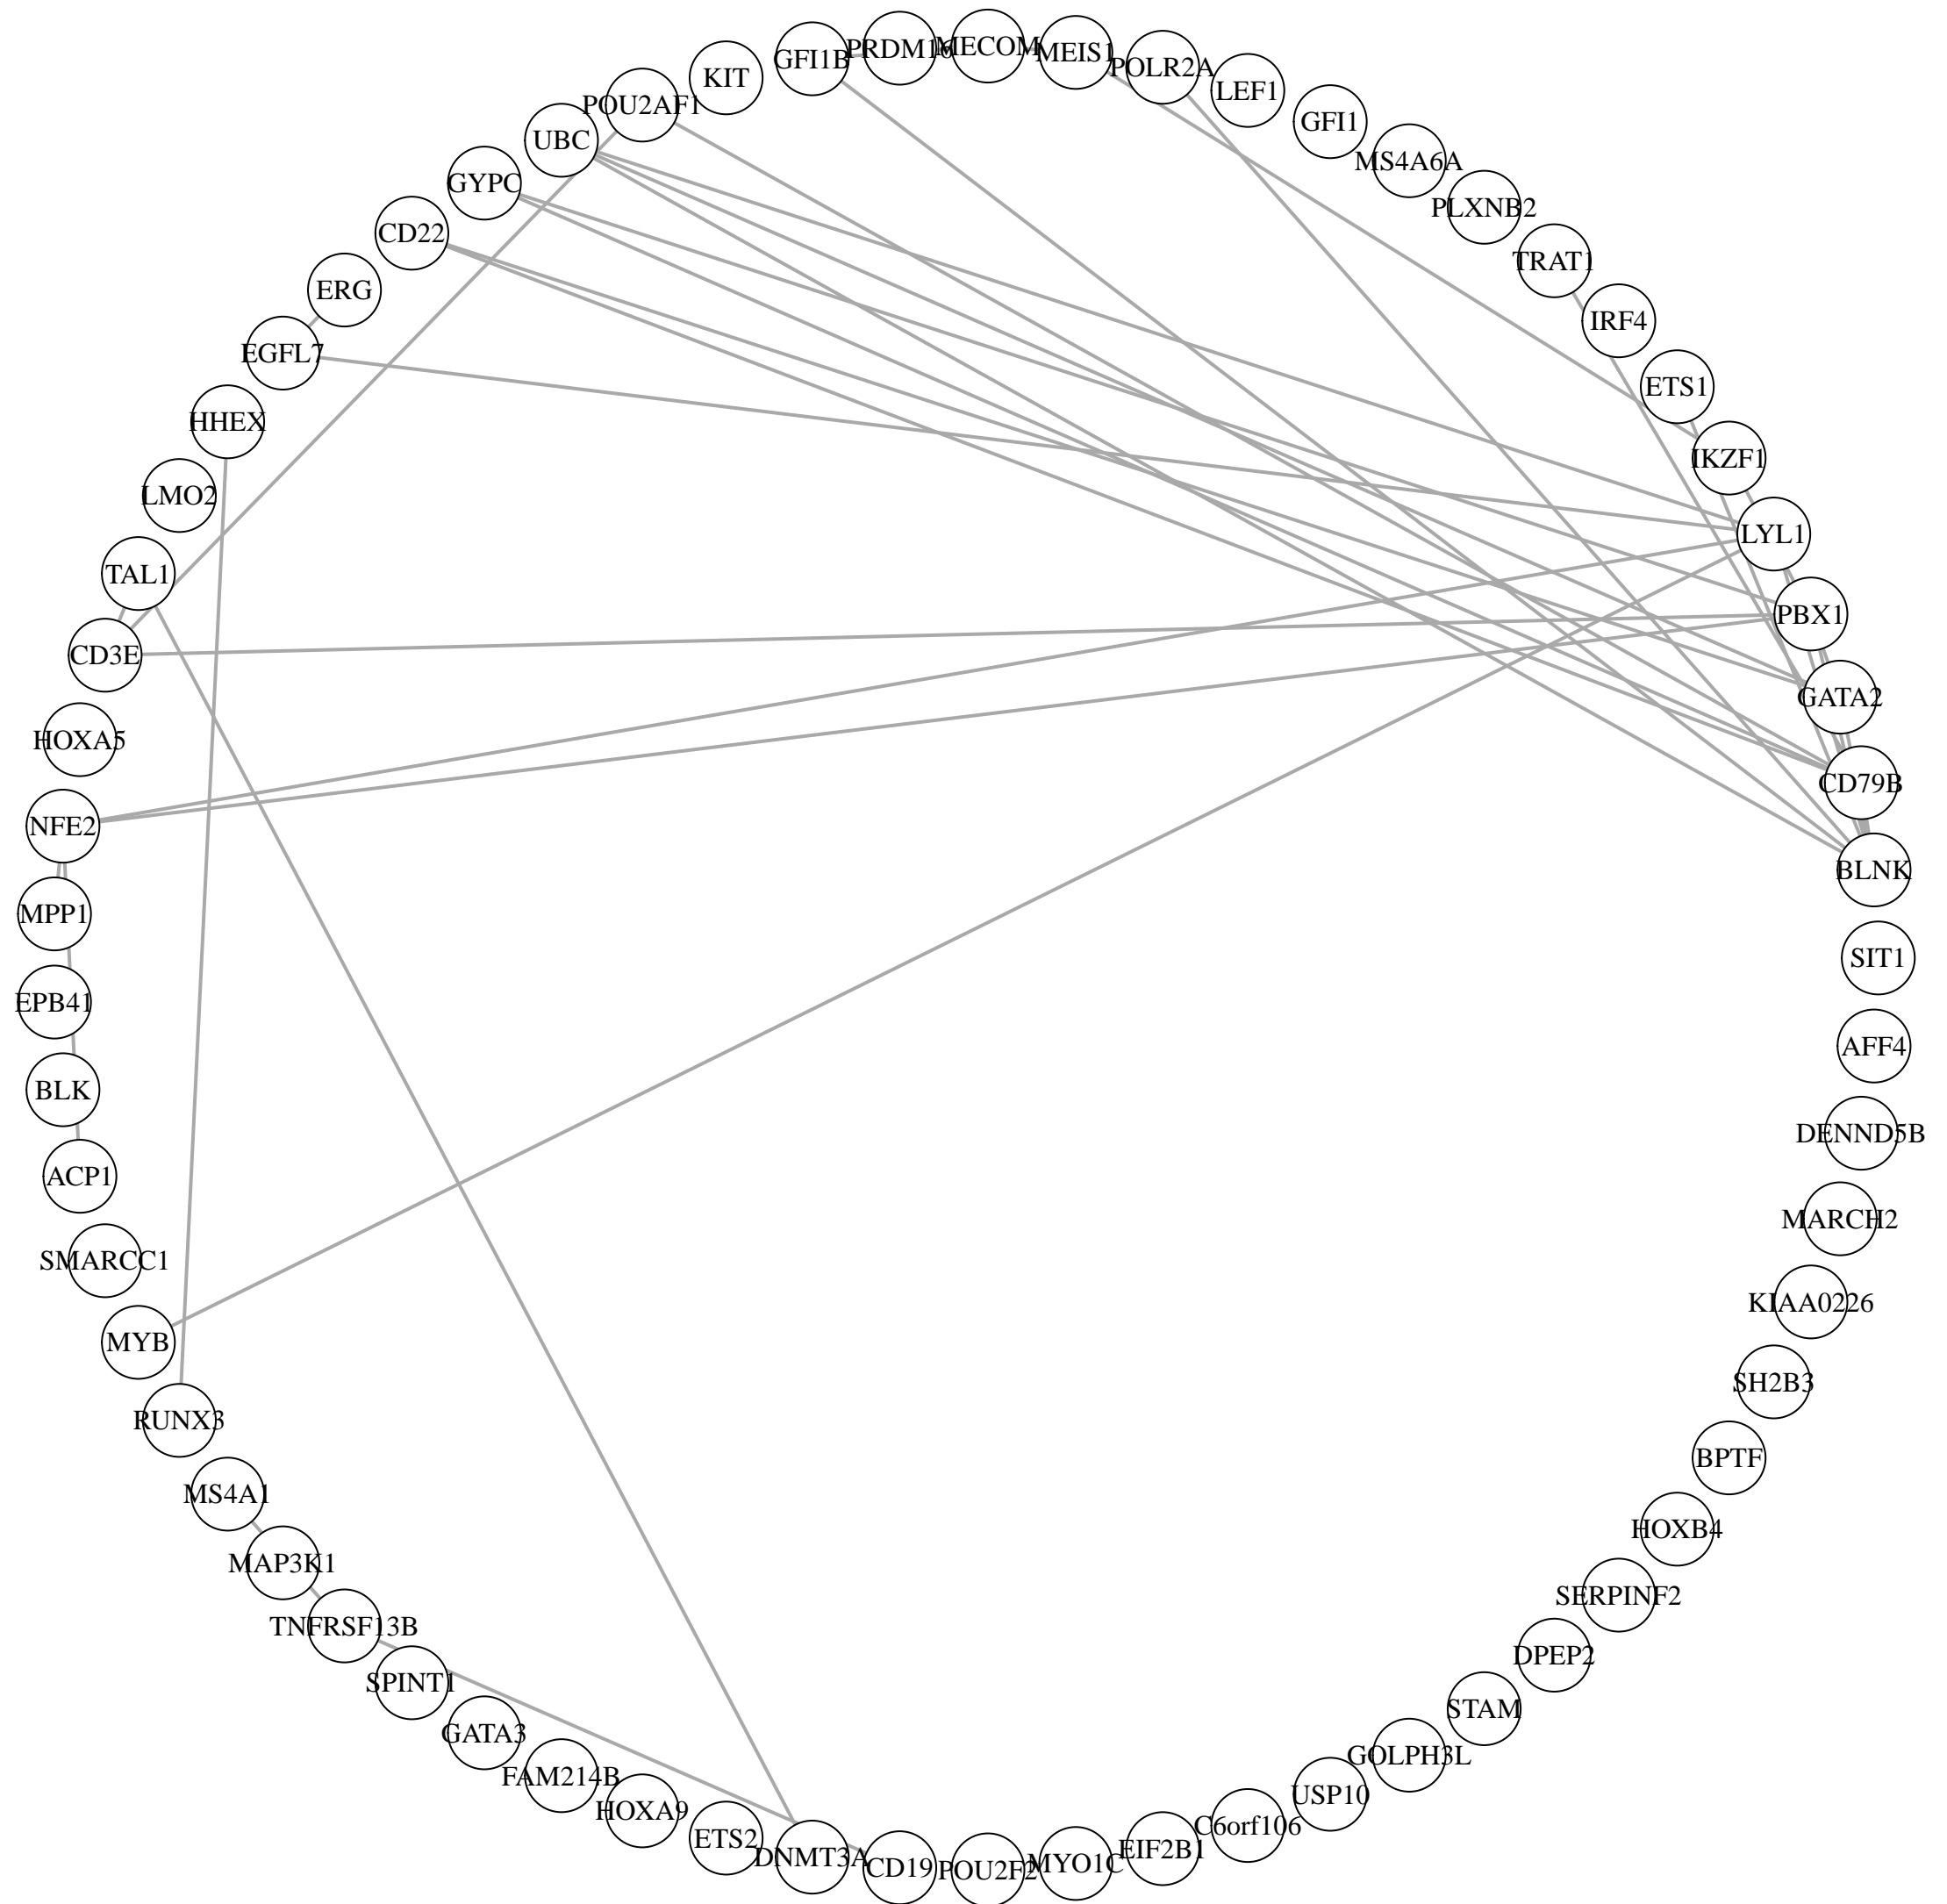

human\_HSCtoLMPP\_time 6

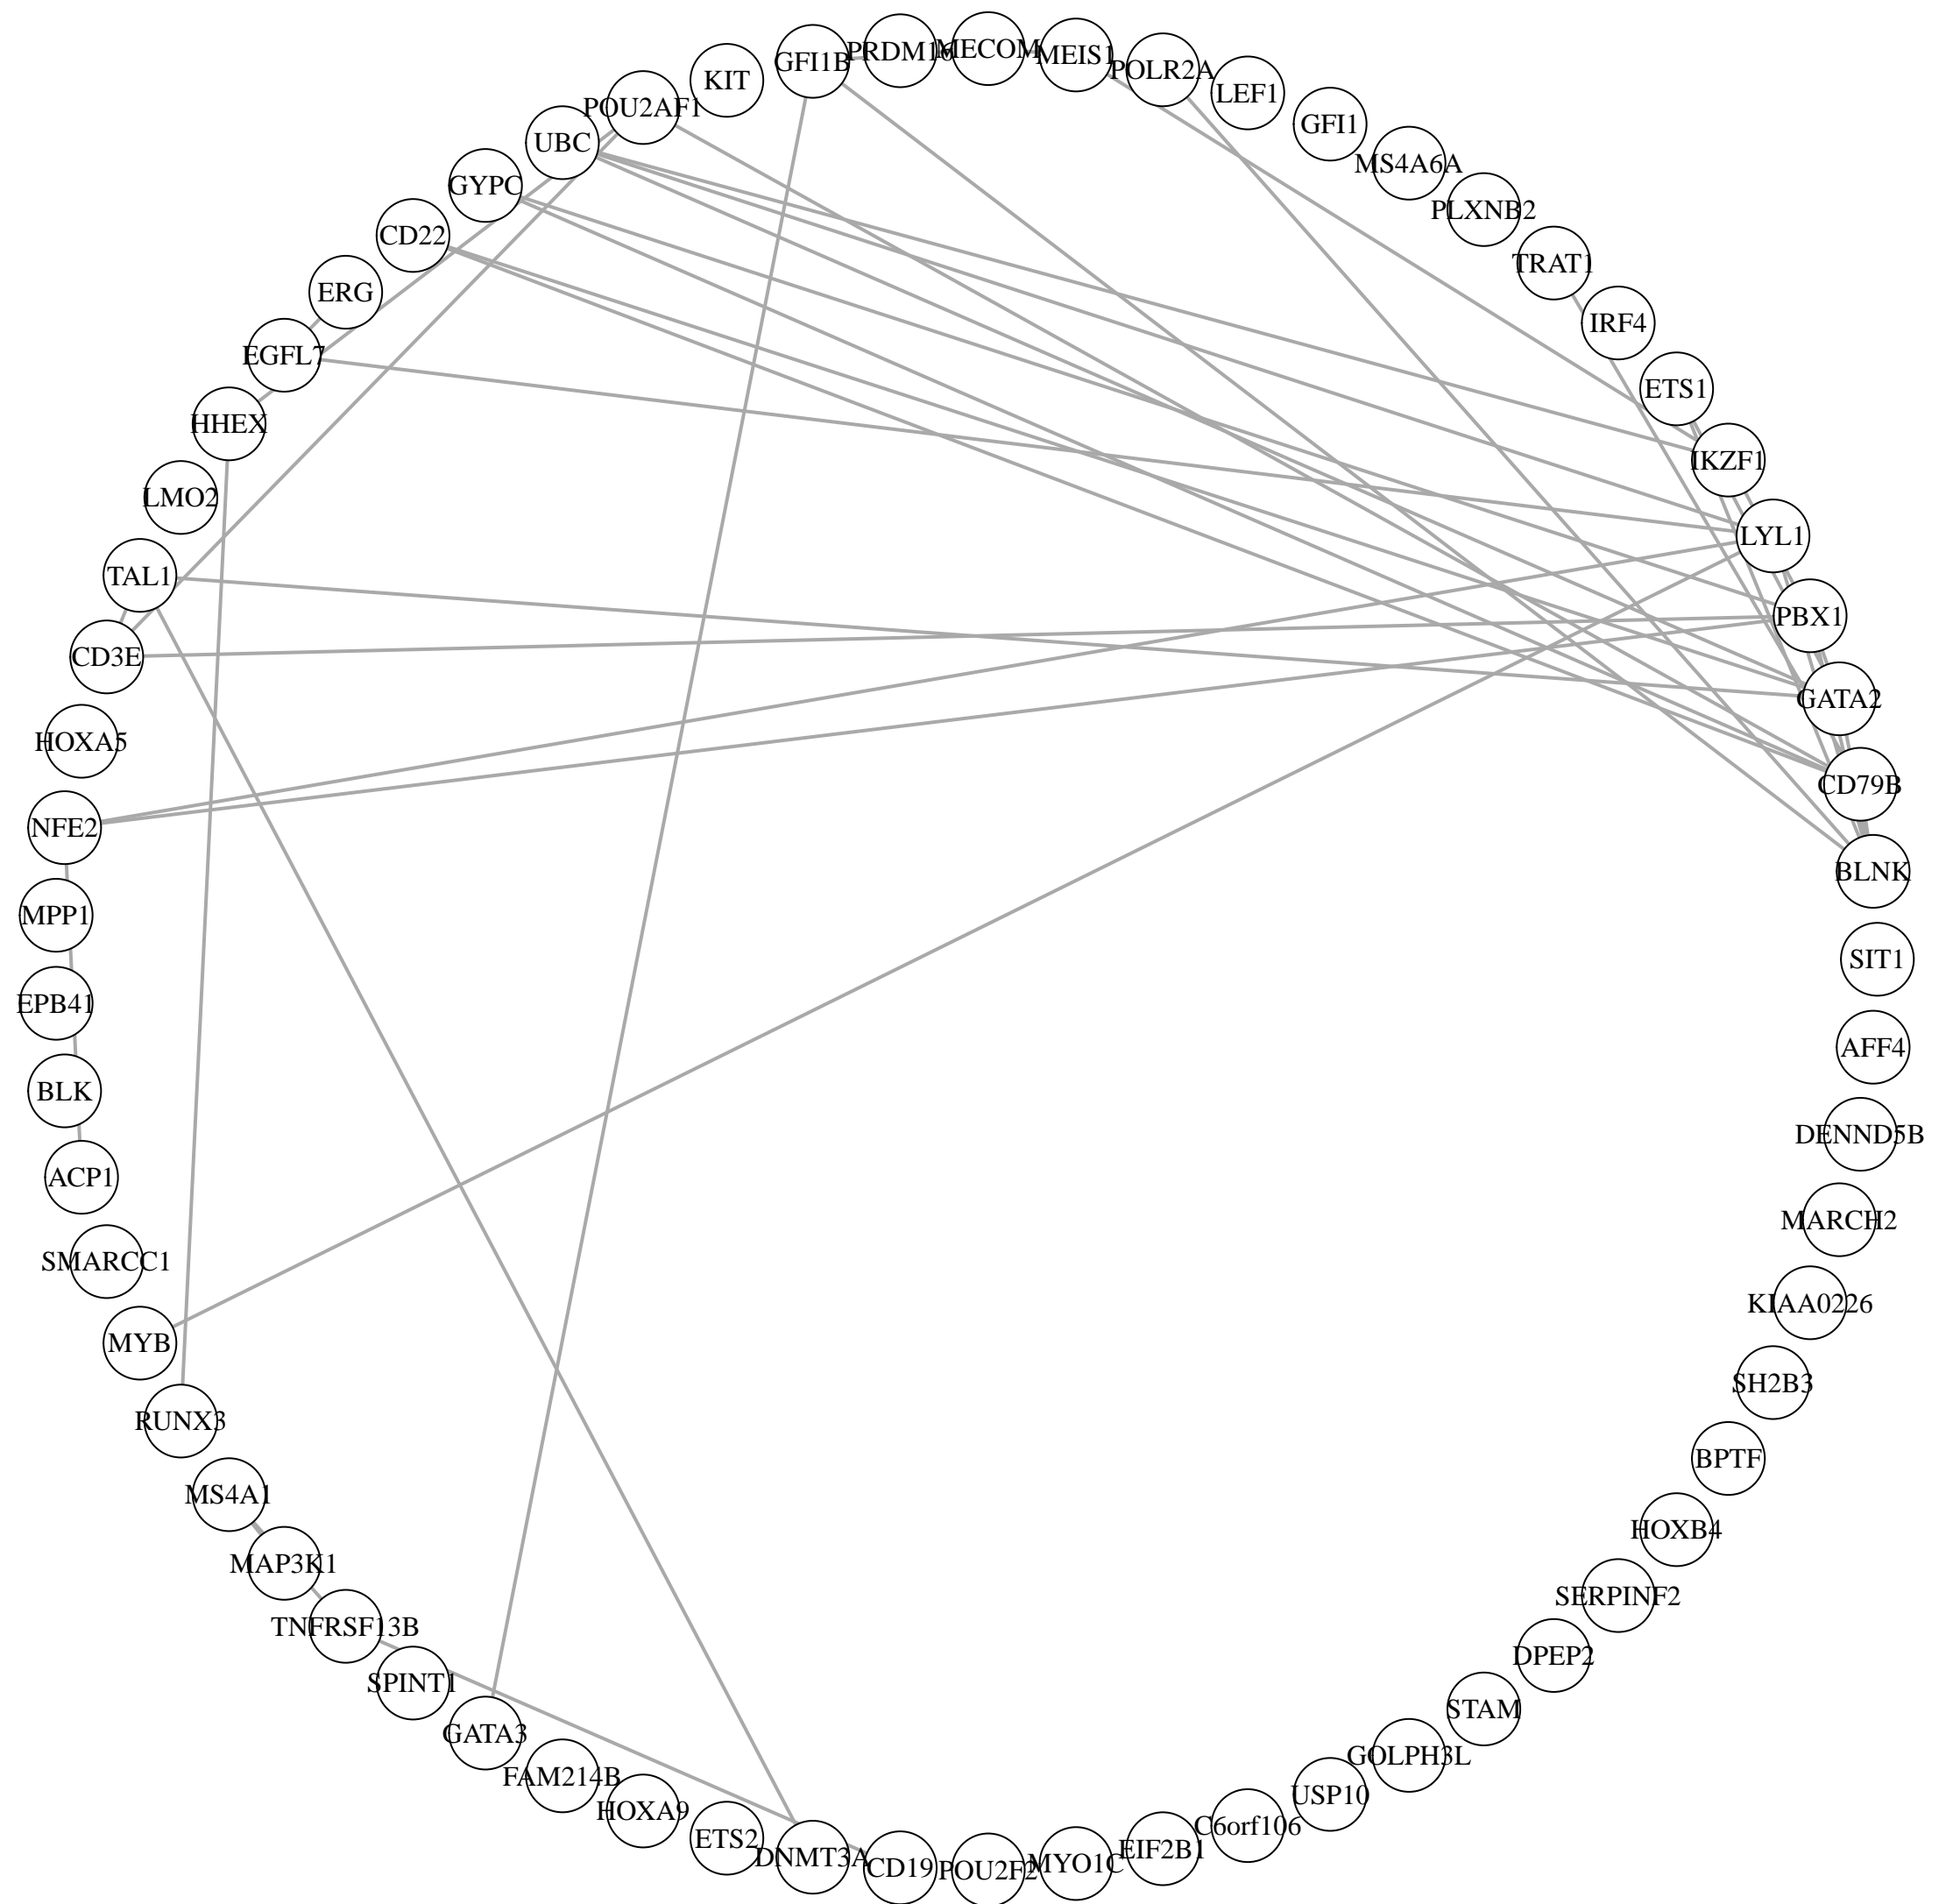

human\_HSCtoLMPP\_time 7

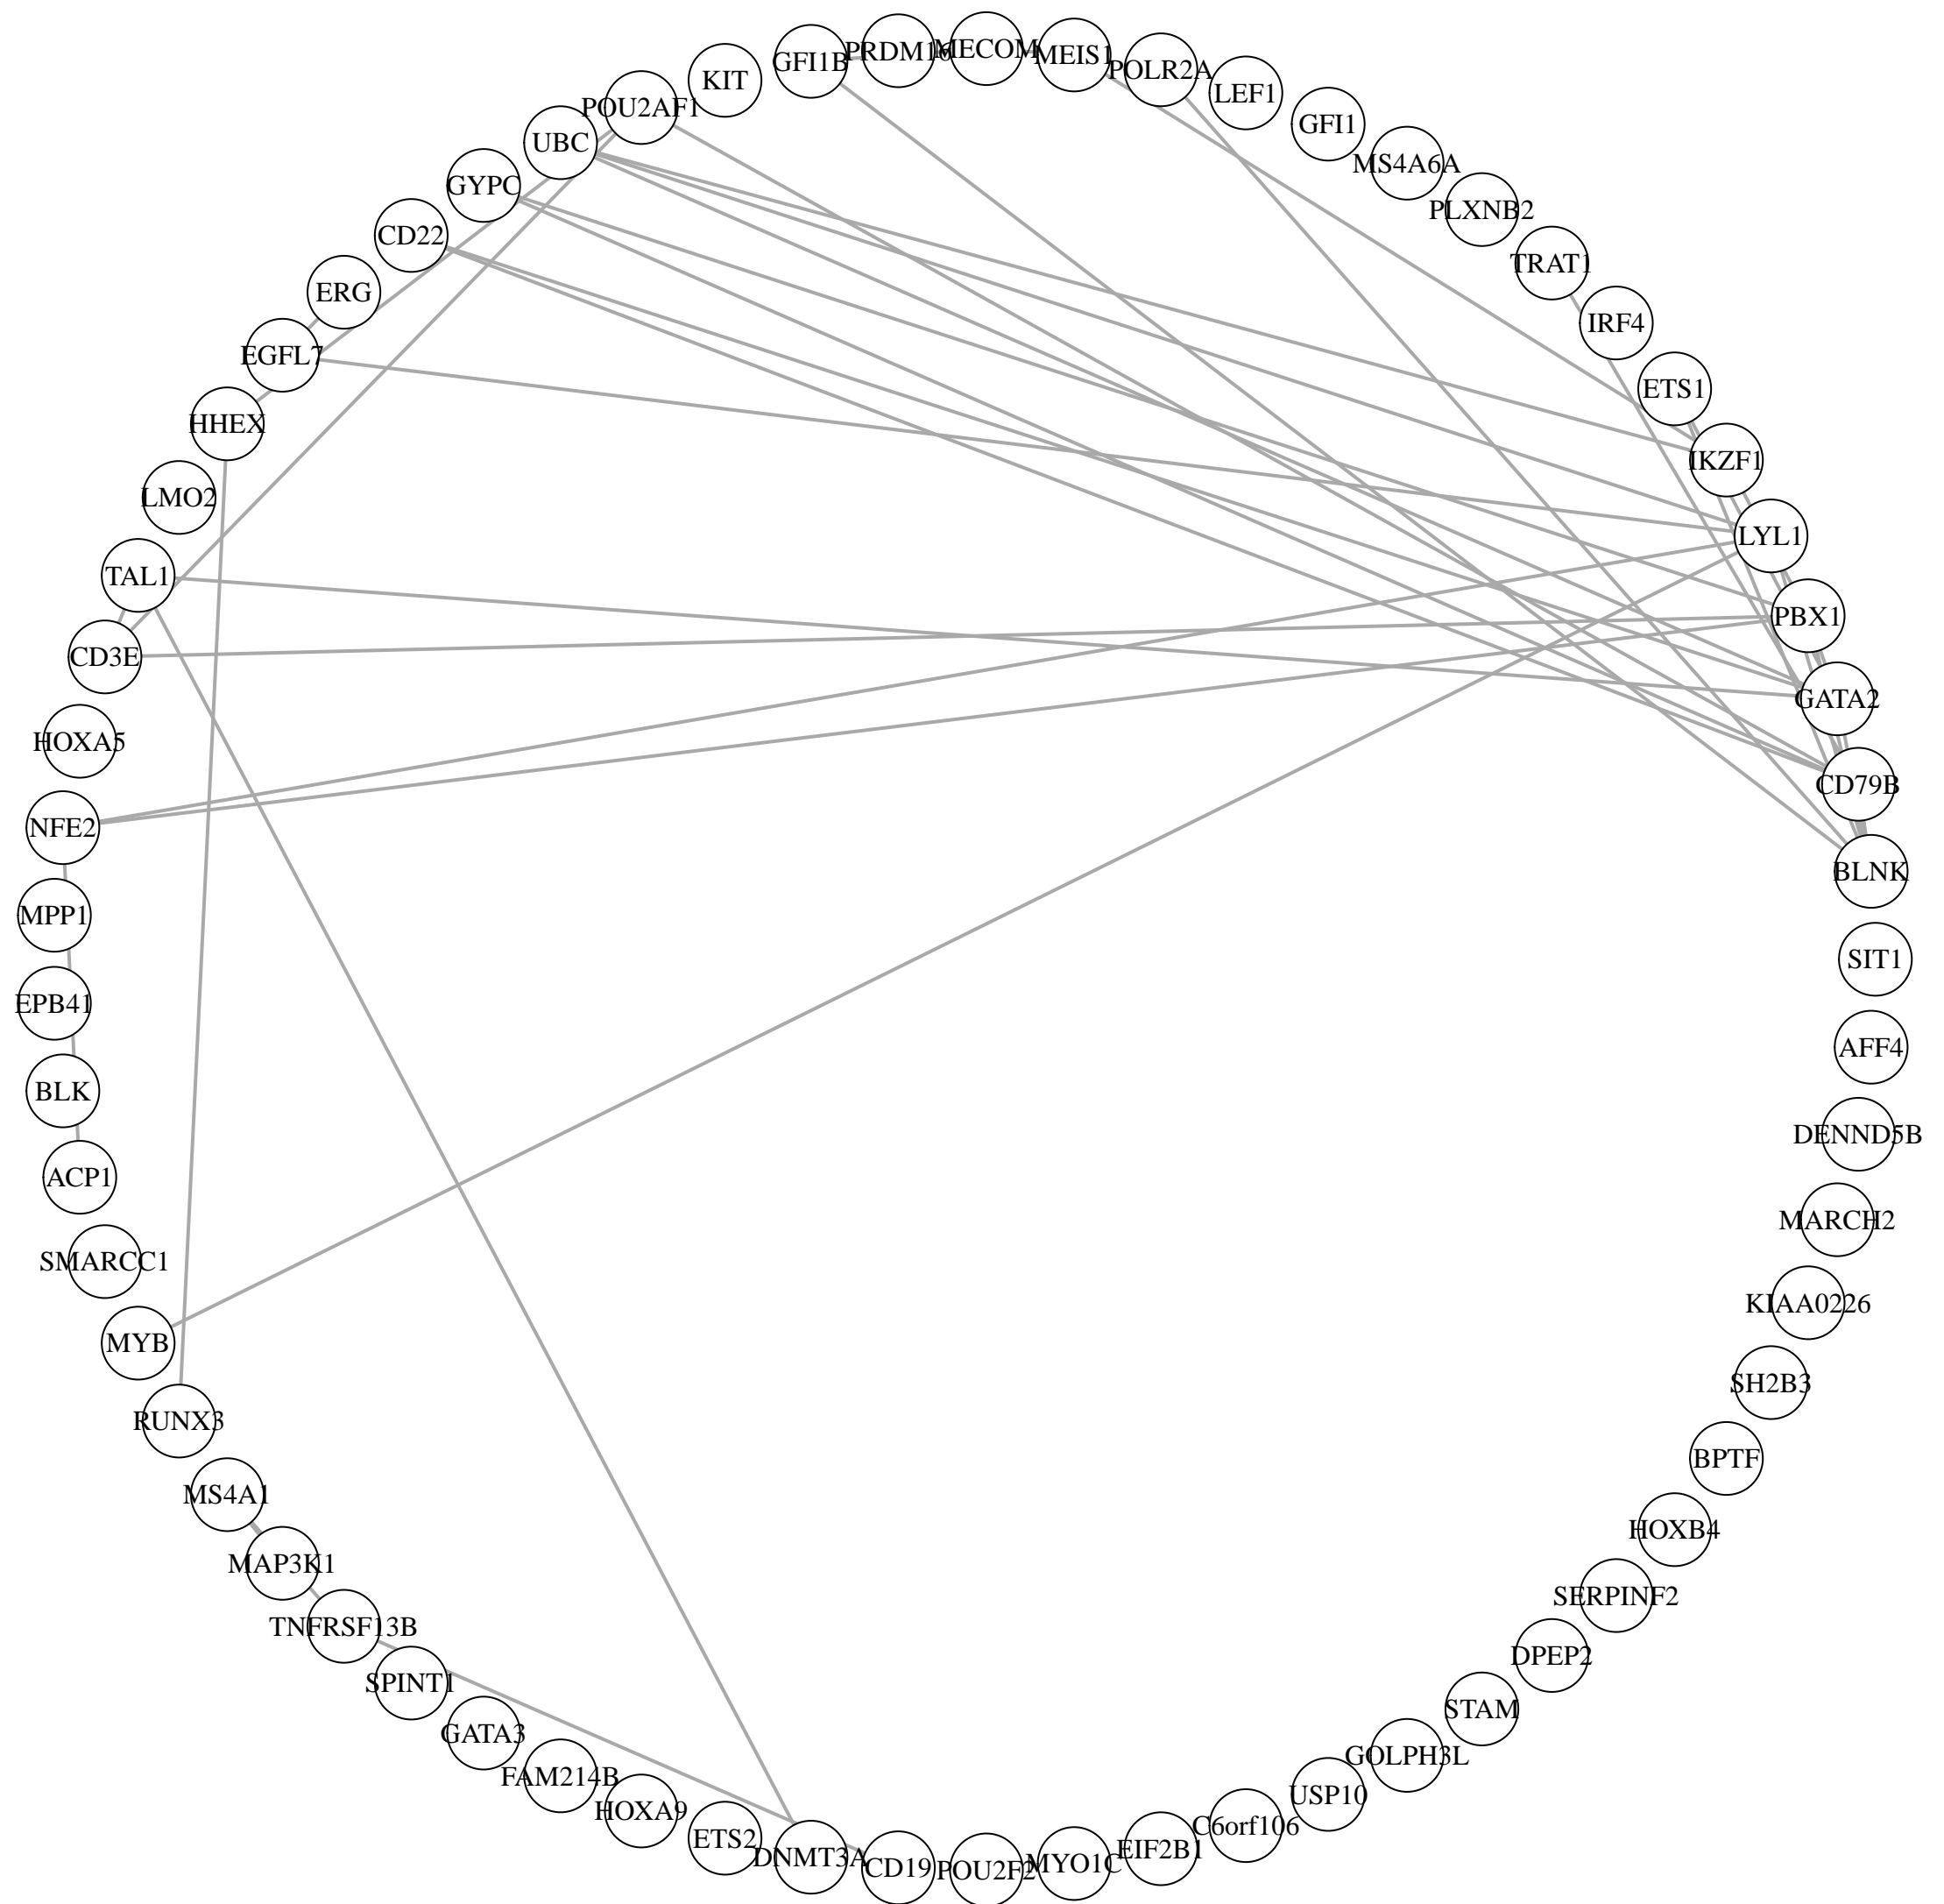

human\_HSCtoLMPP\_time 8

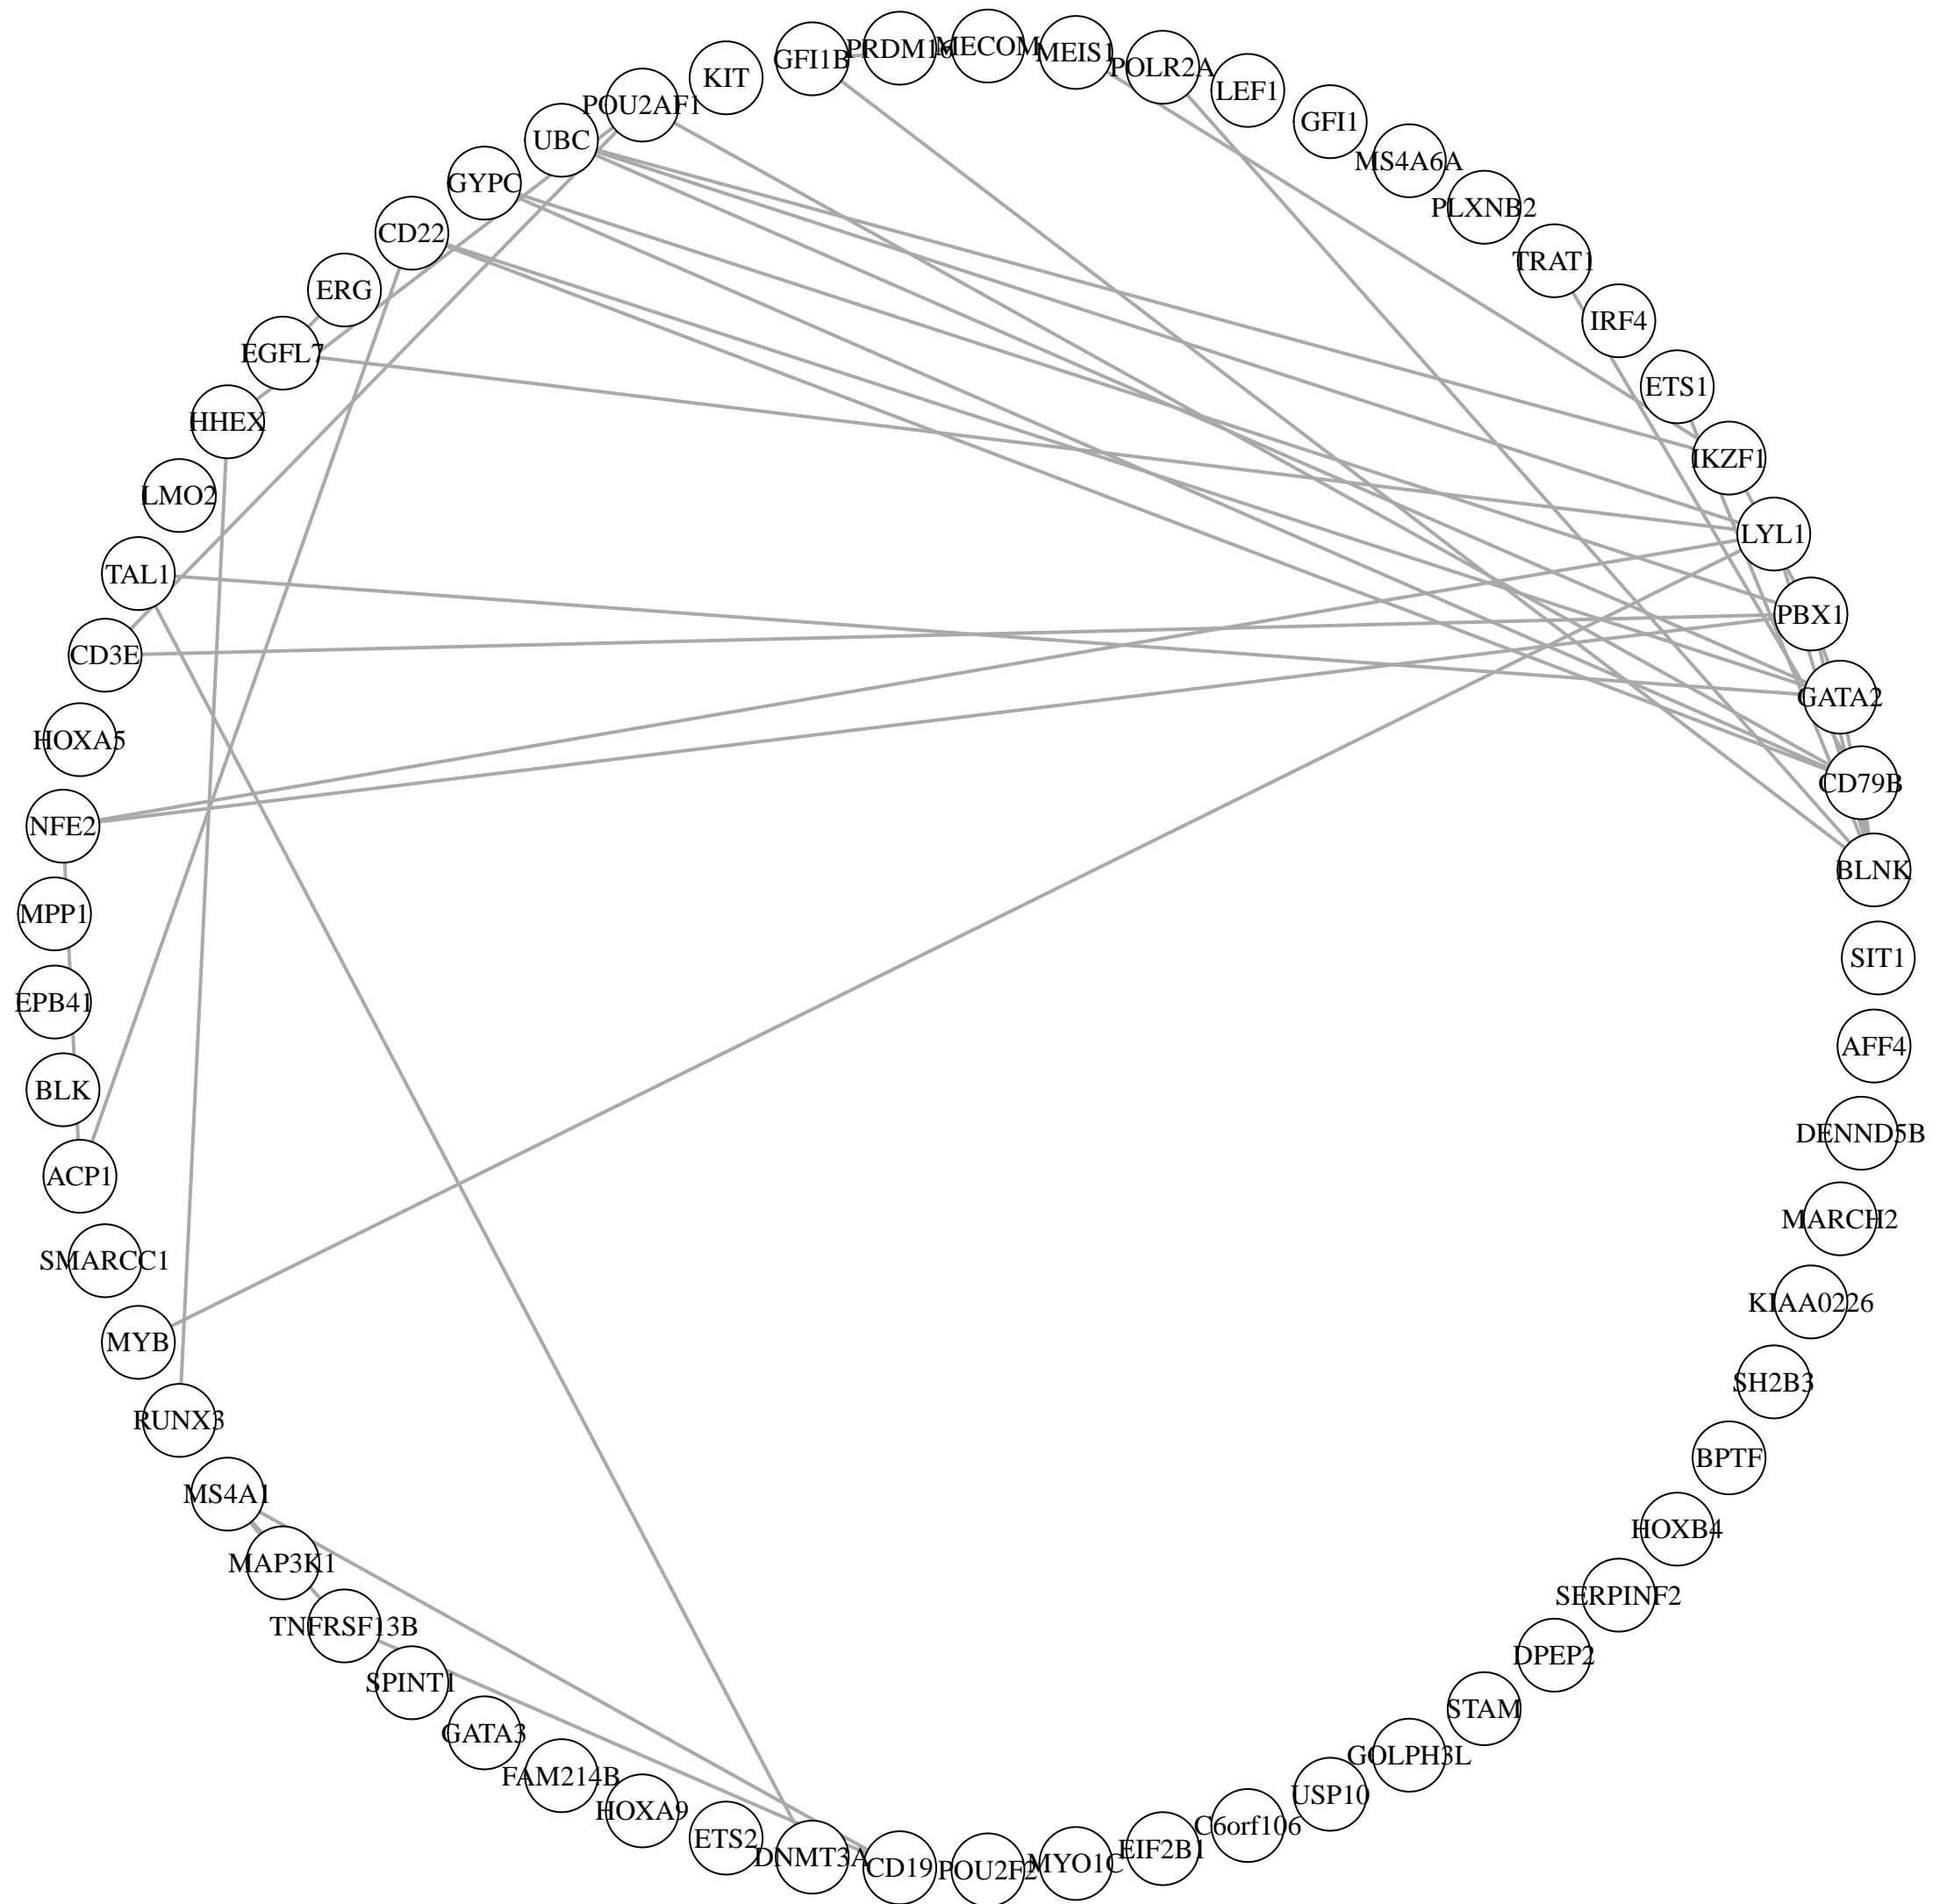

human\_HSCtoLMPP\_time 9

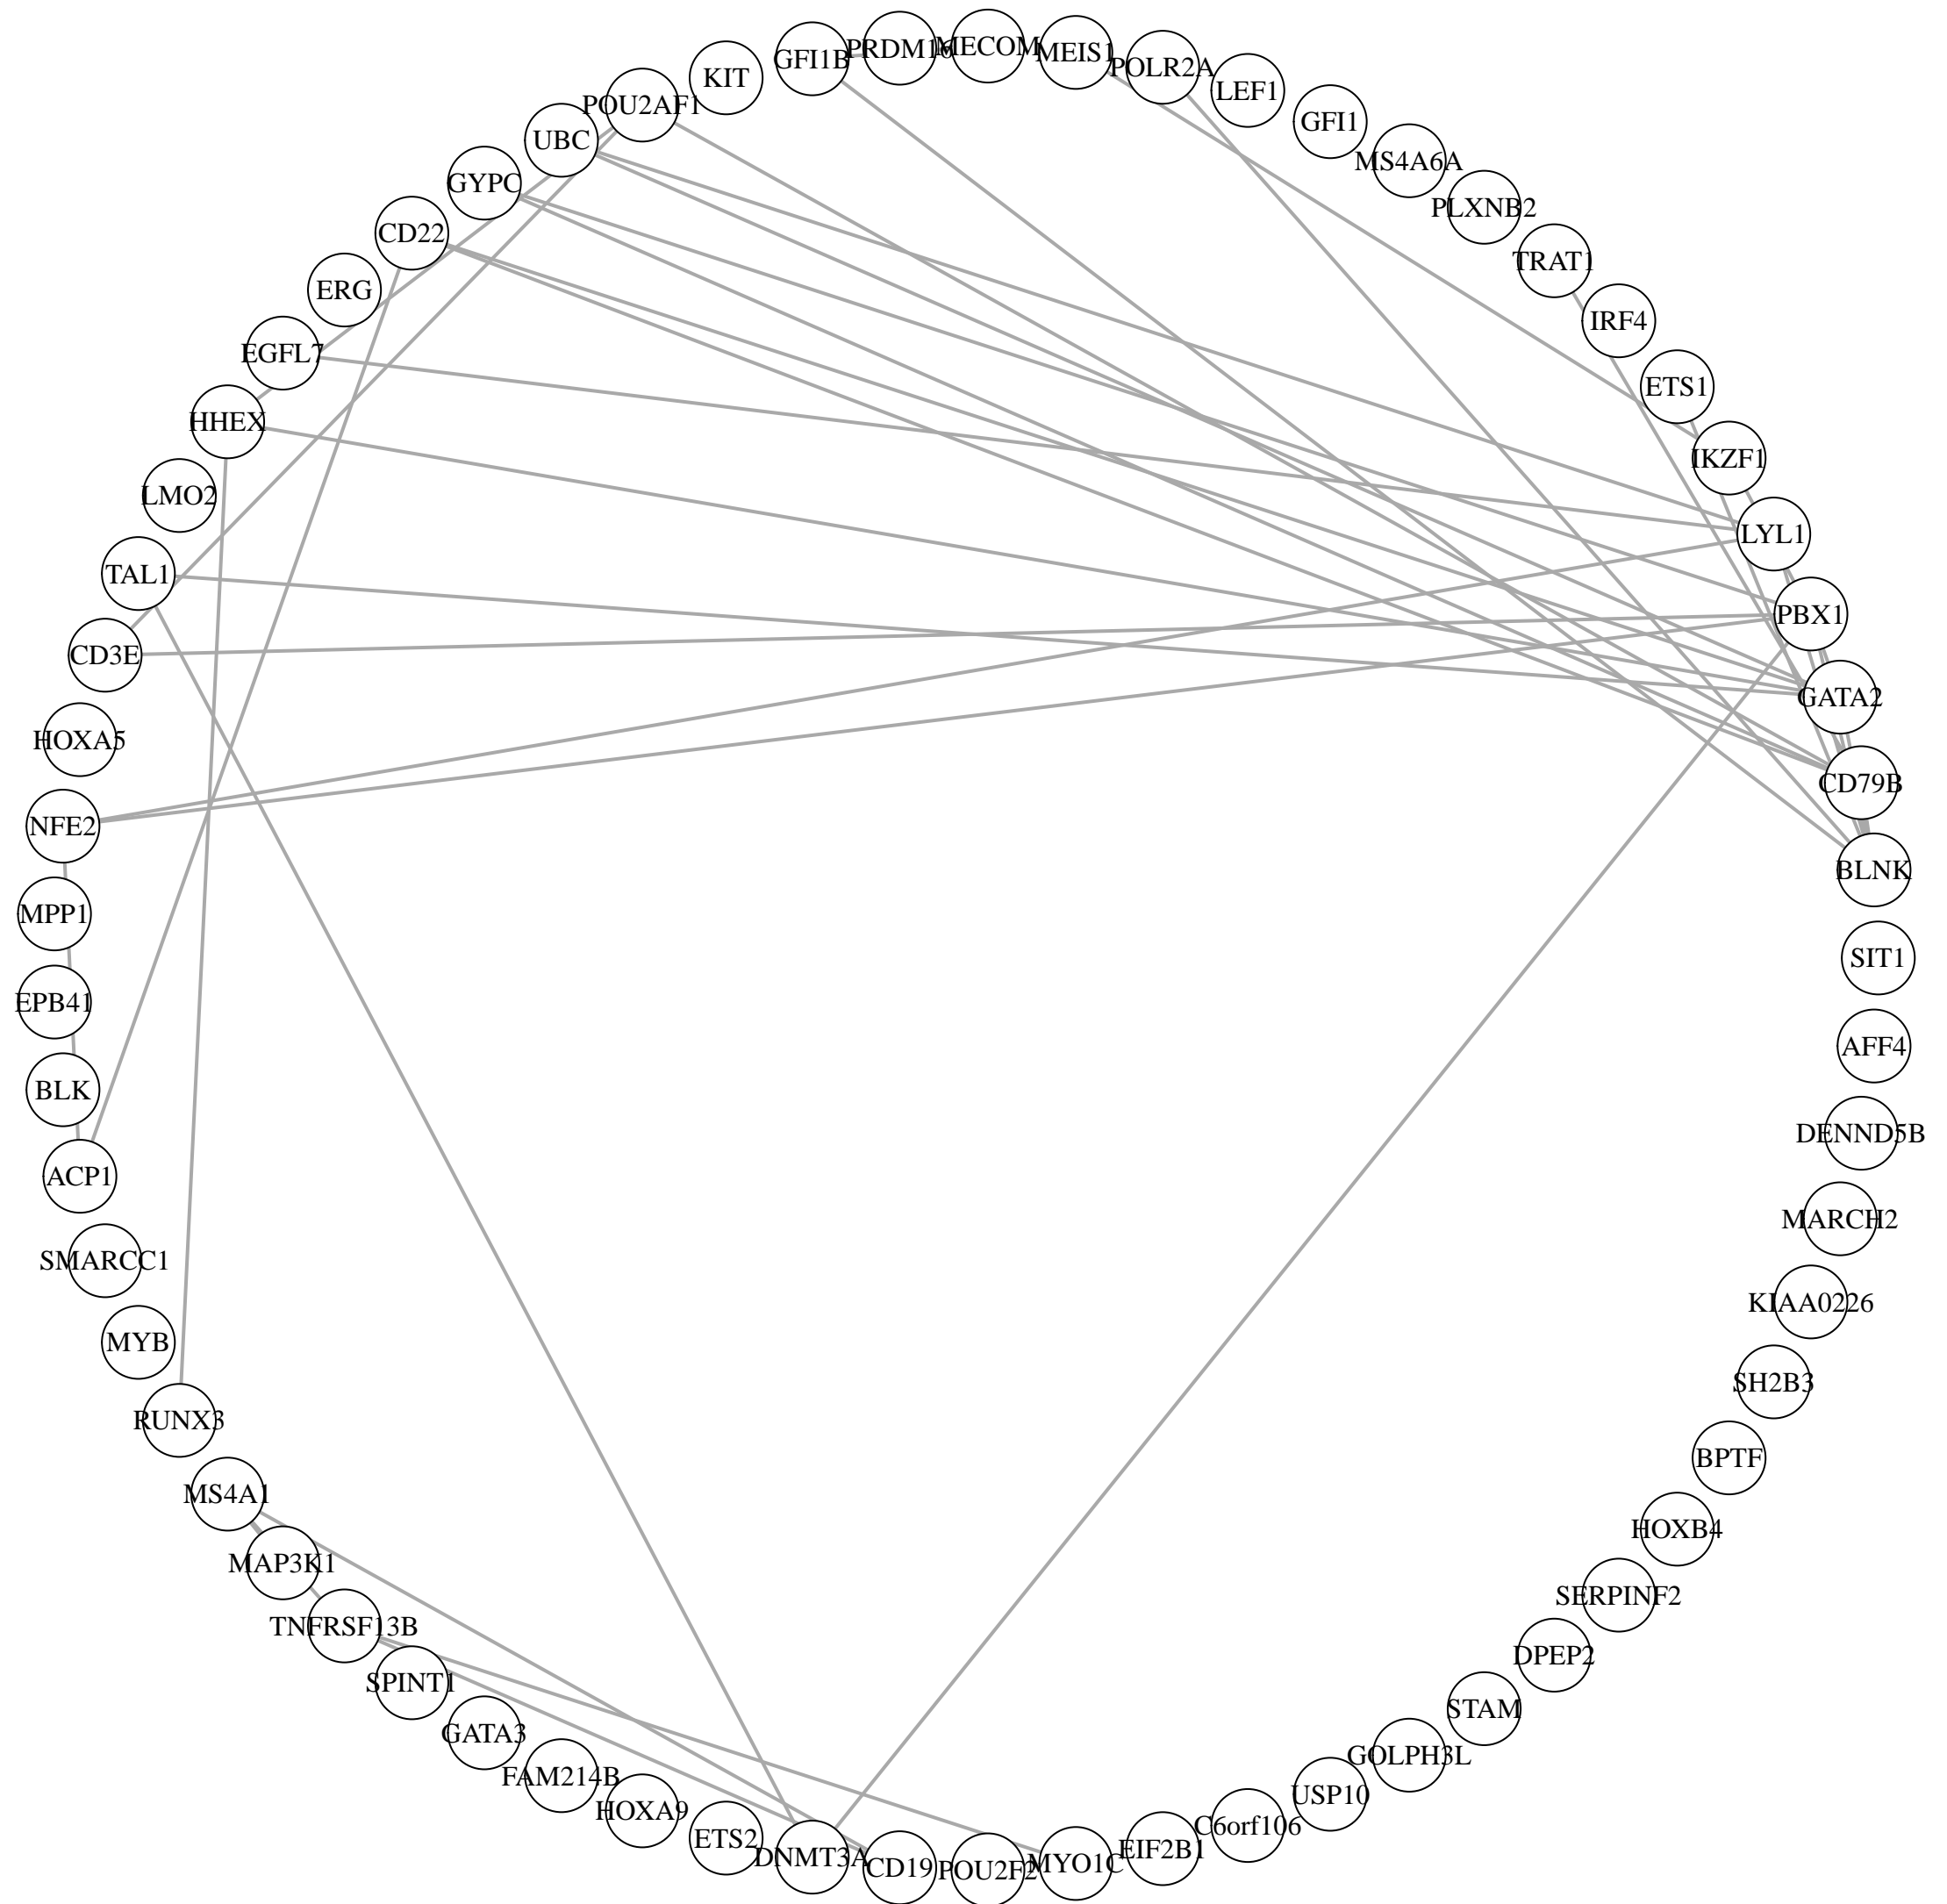



human\_HSCtoLMPP\_time 10

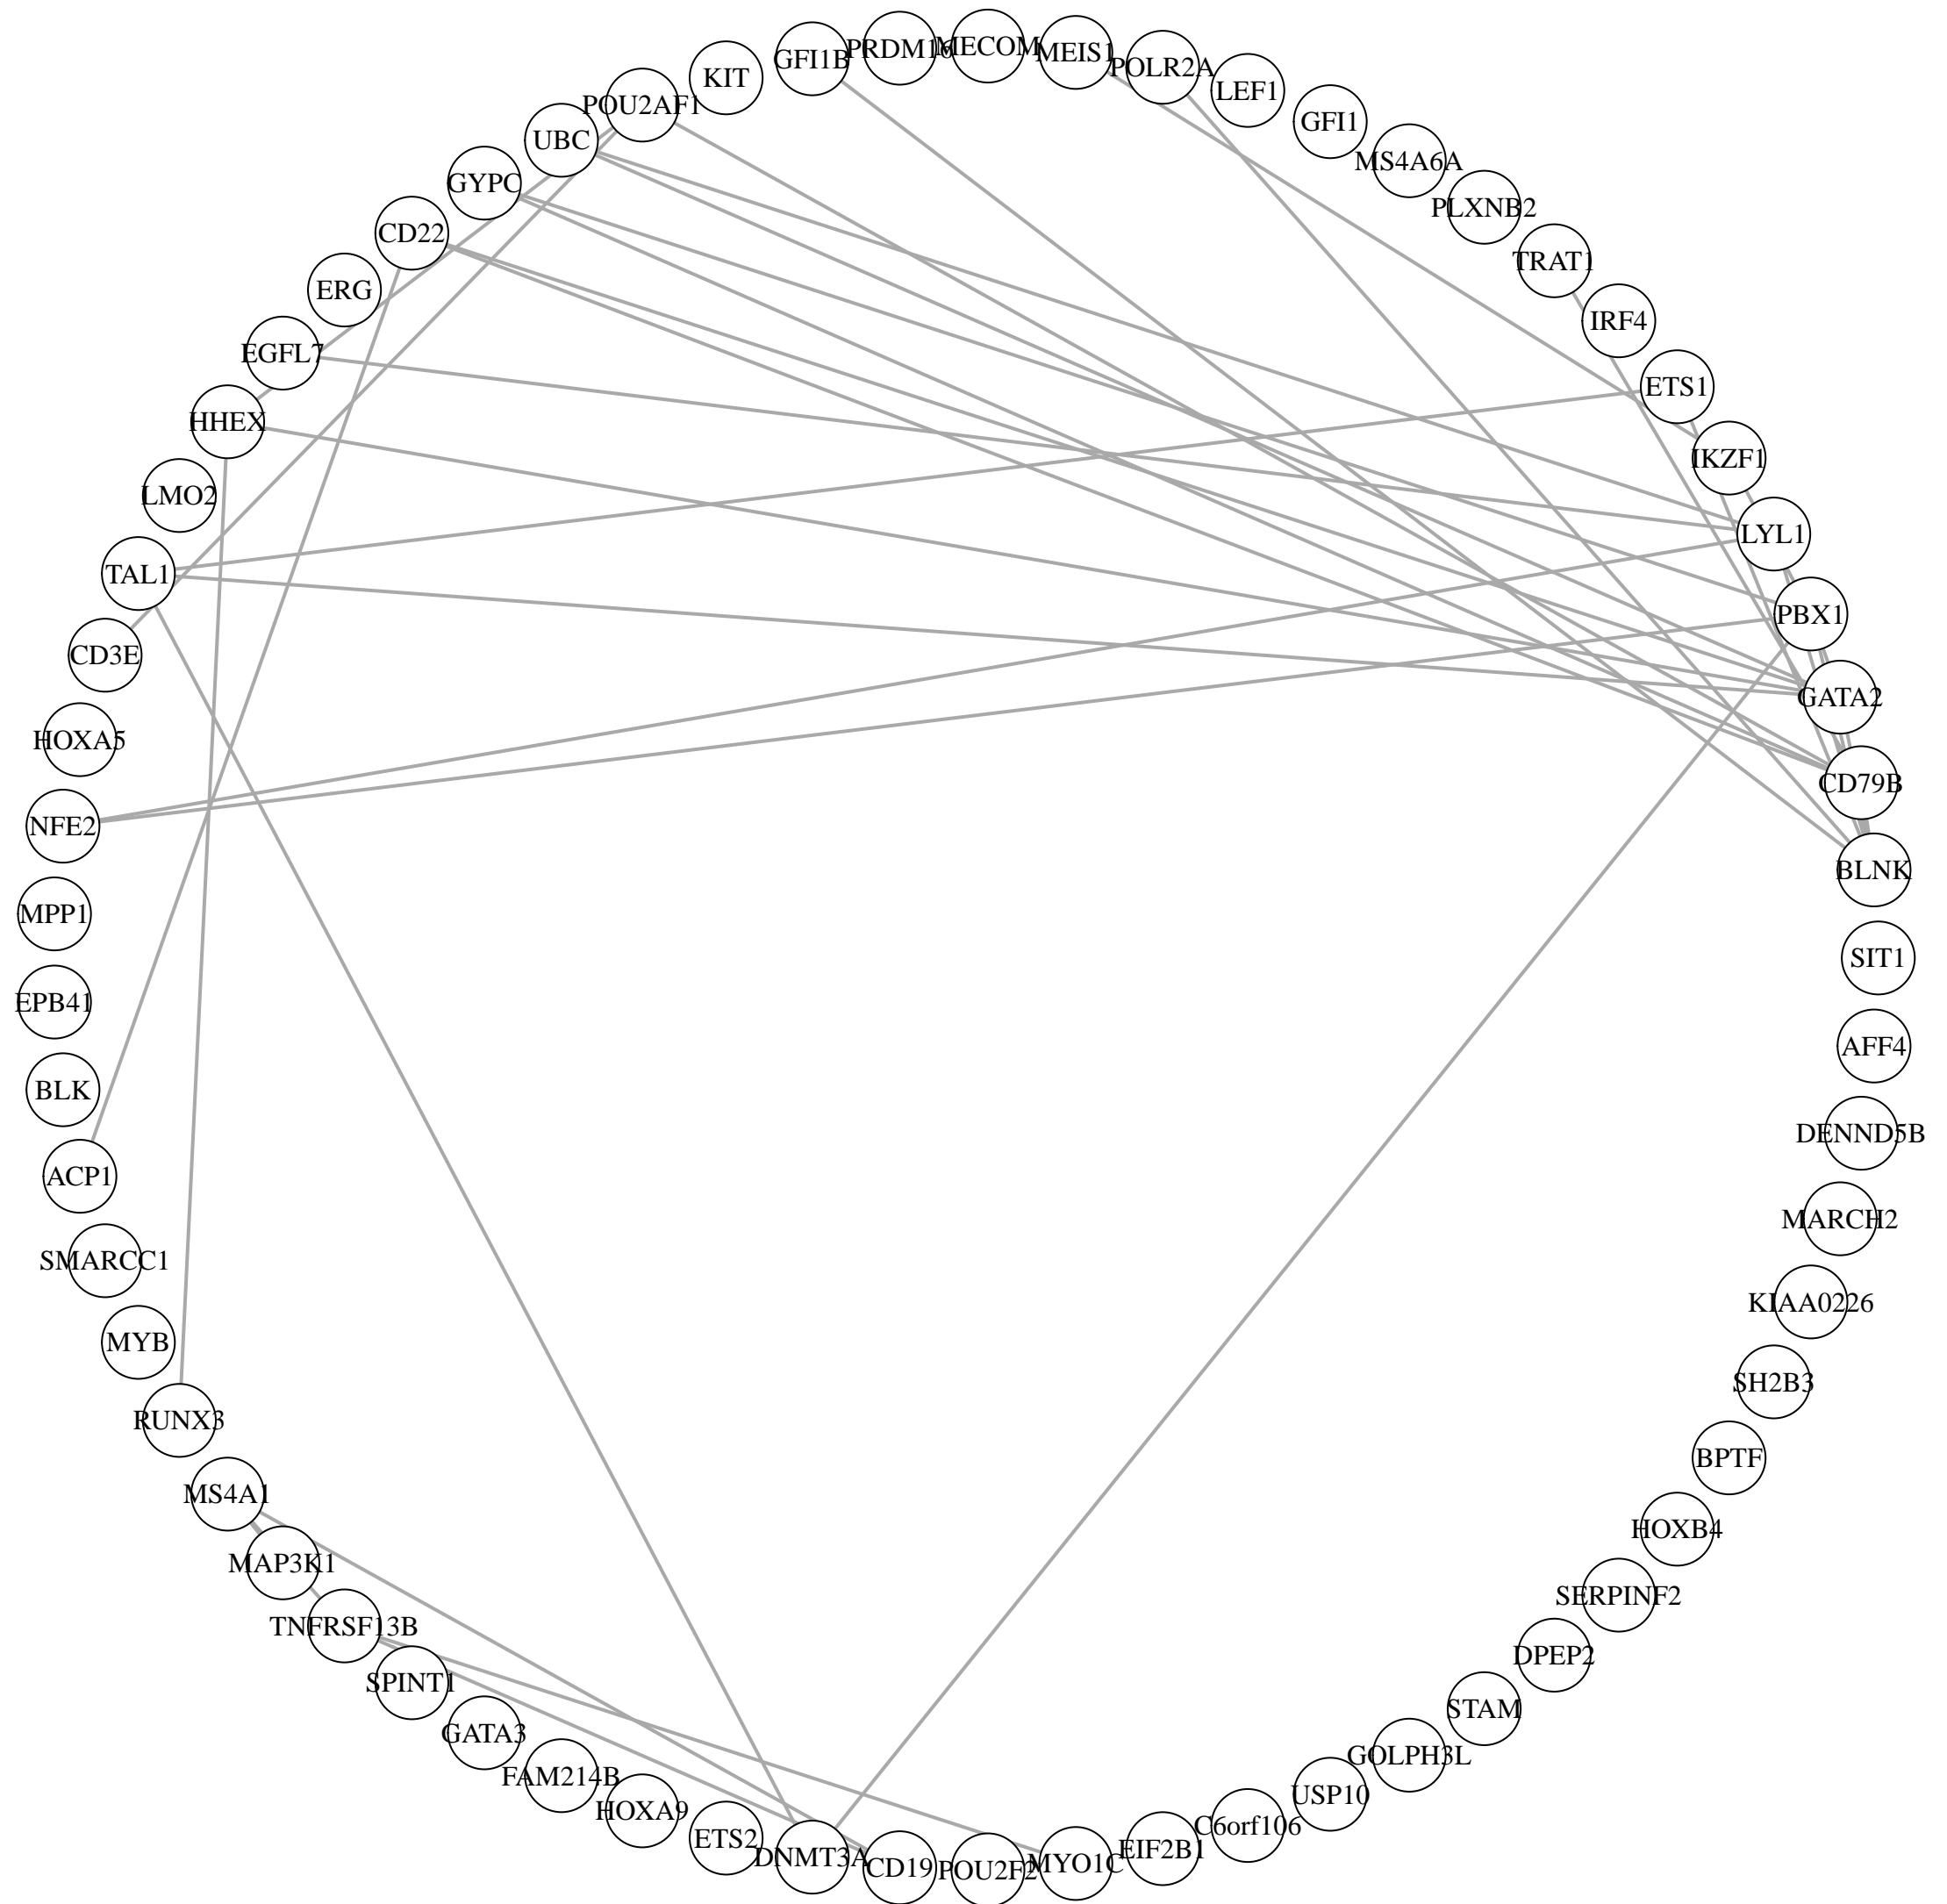

human\_HSCtoLMPP\_time 11

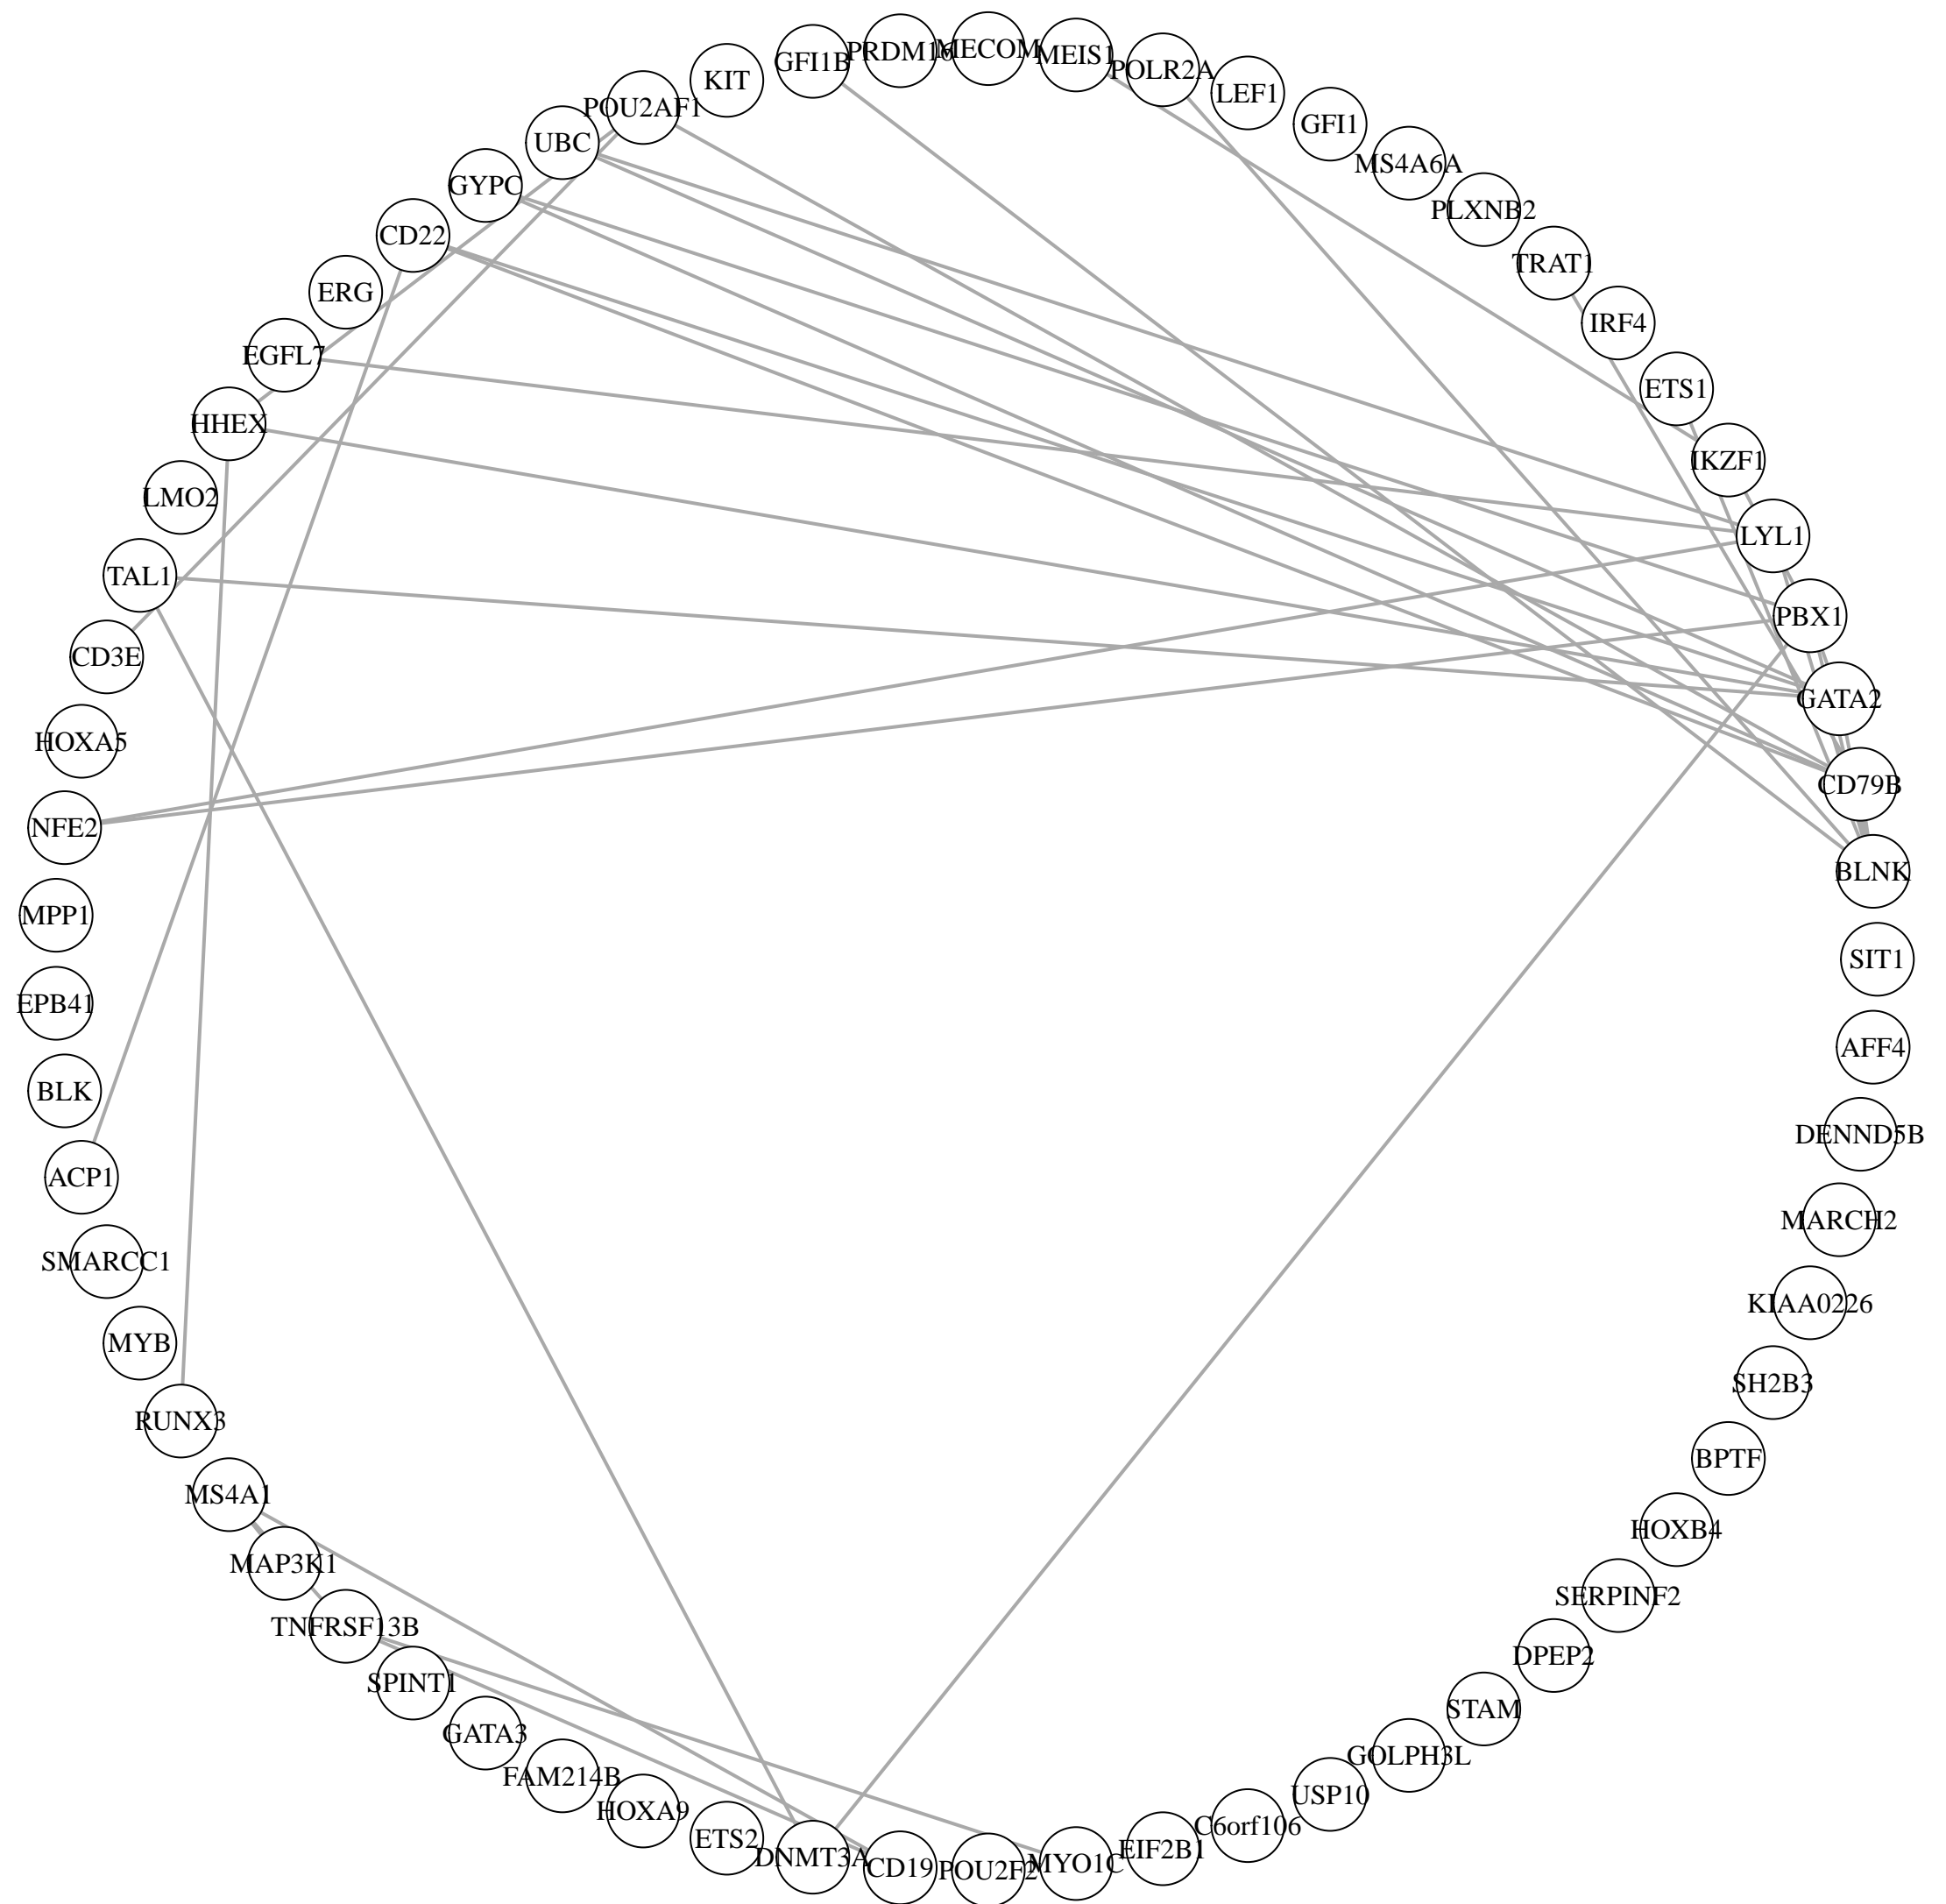

human\_HSCtoLMPP\_time 12

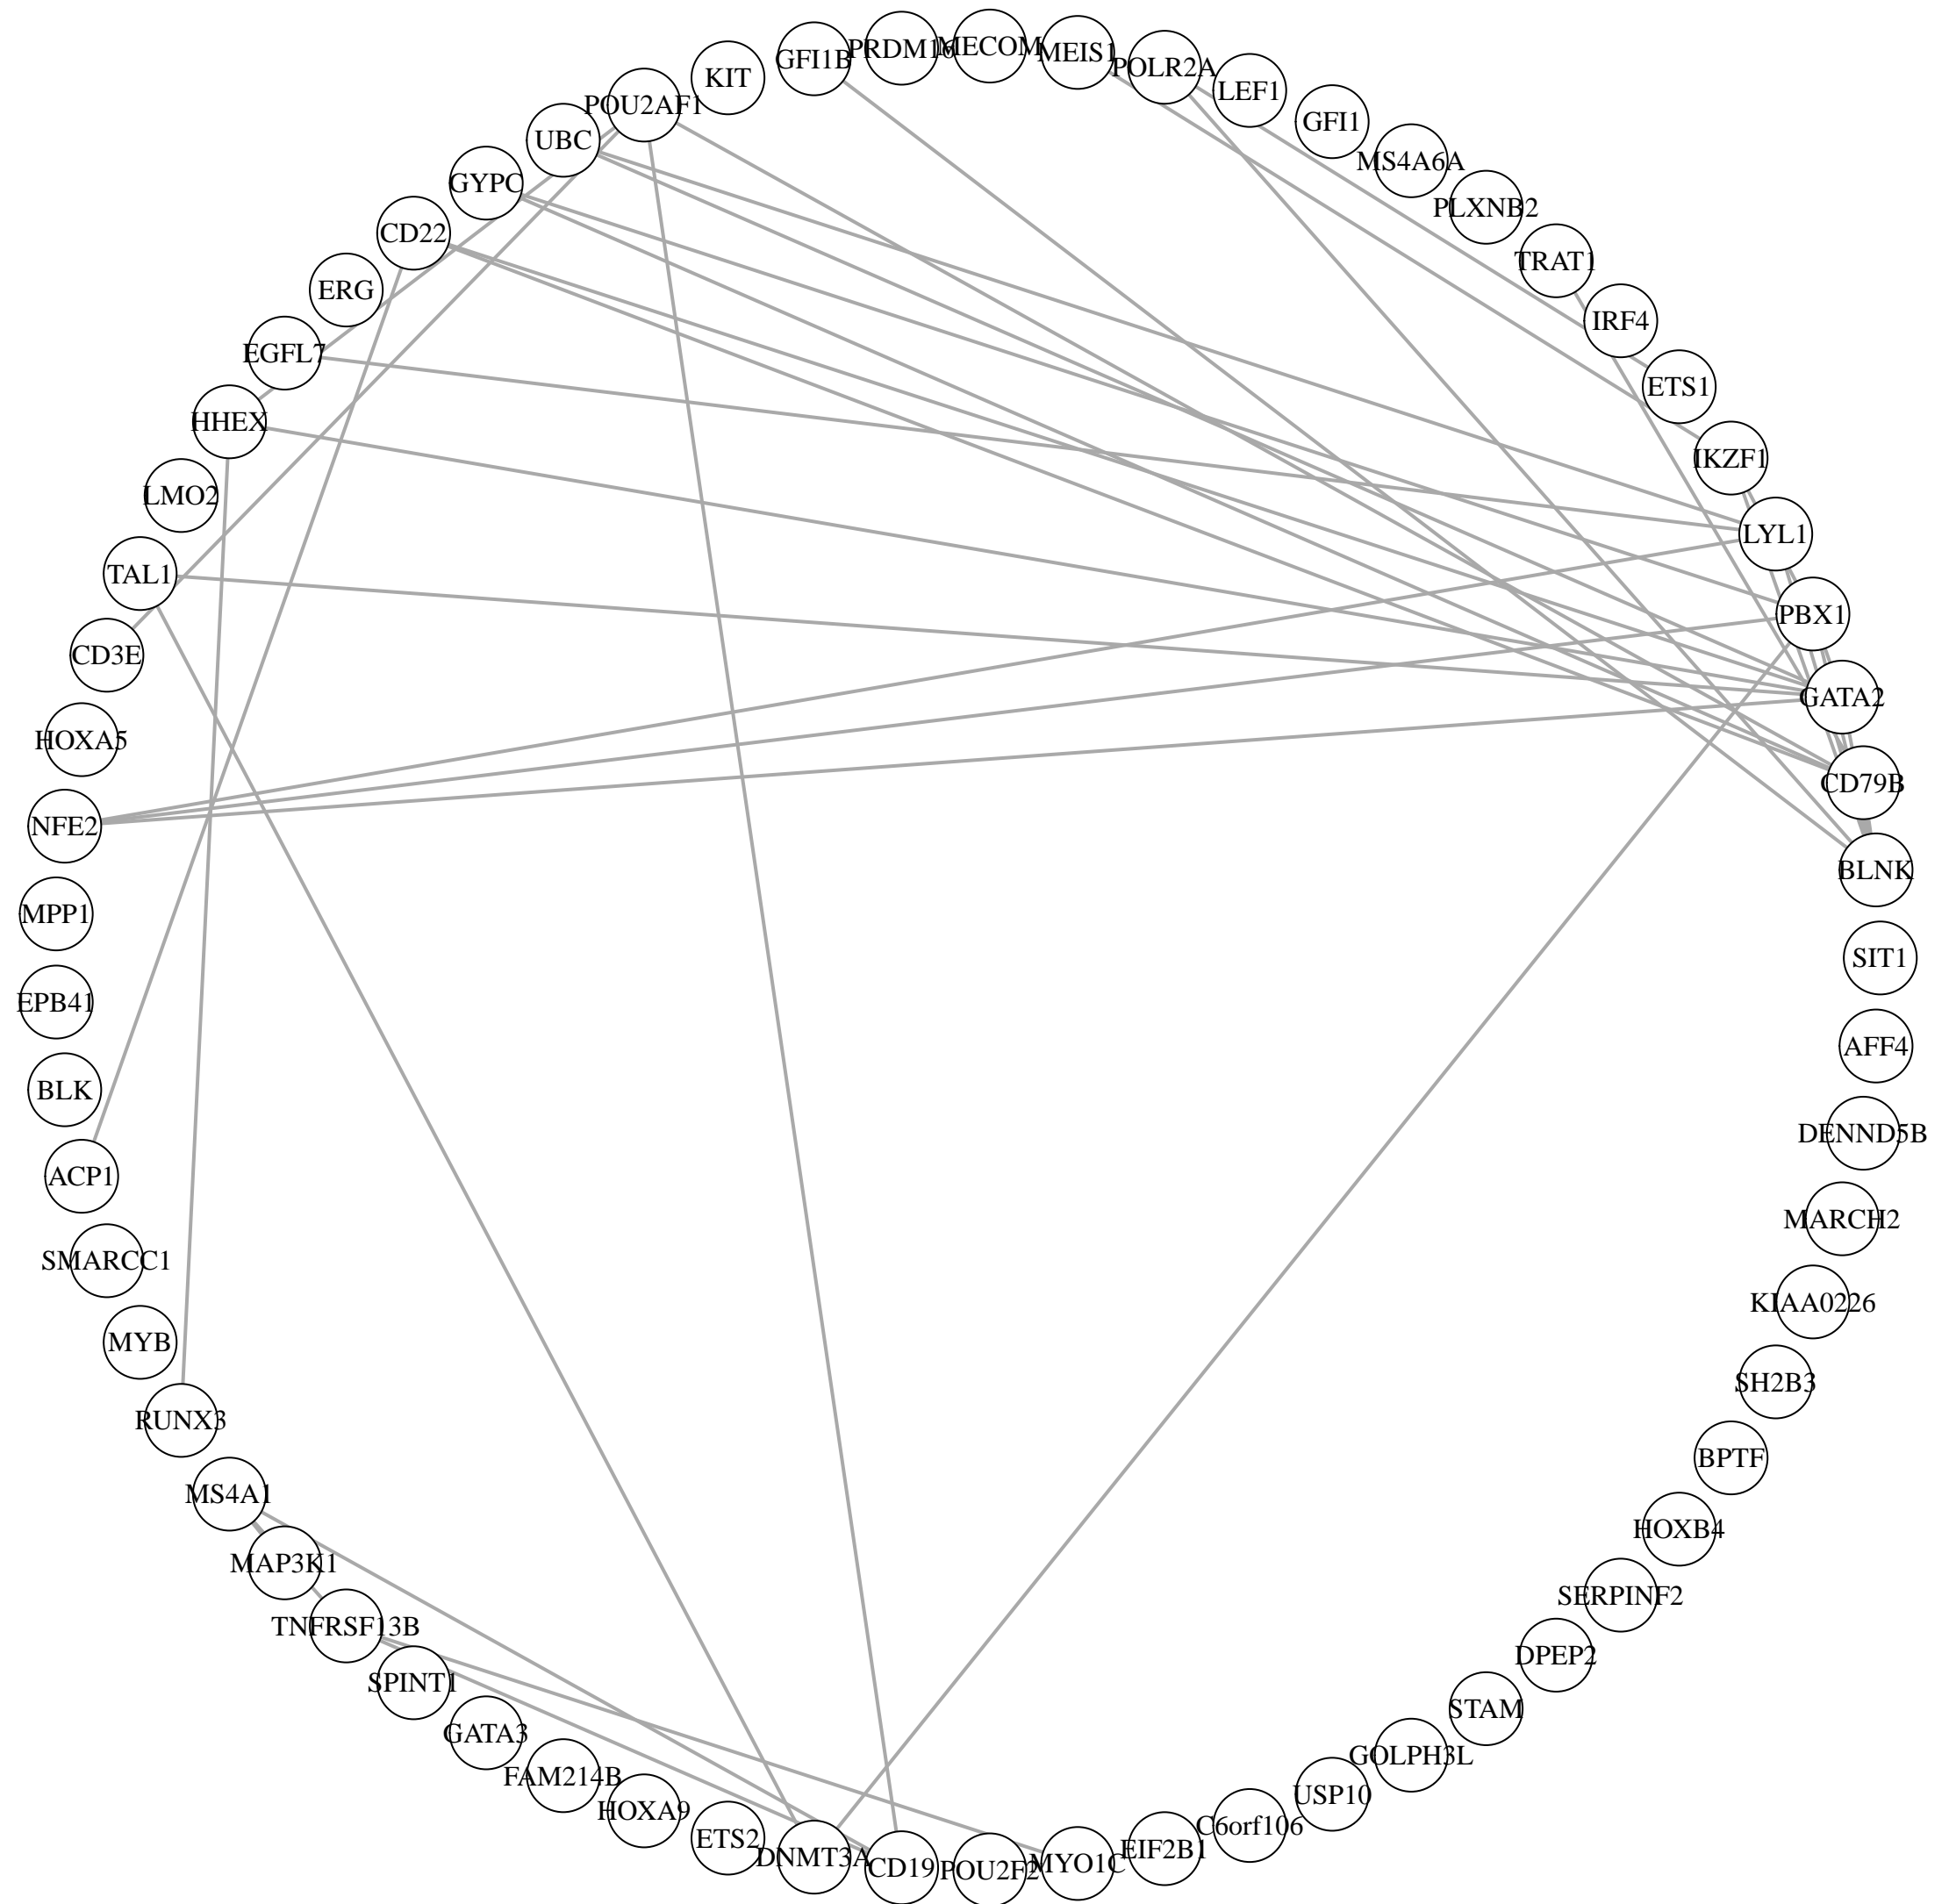

human\_HSCtoLMPP\_time 13

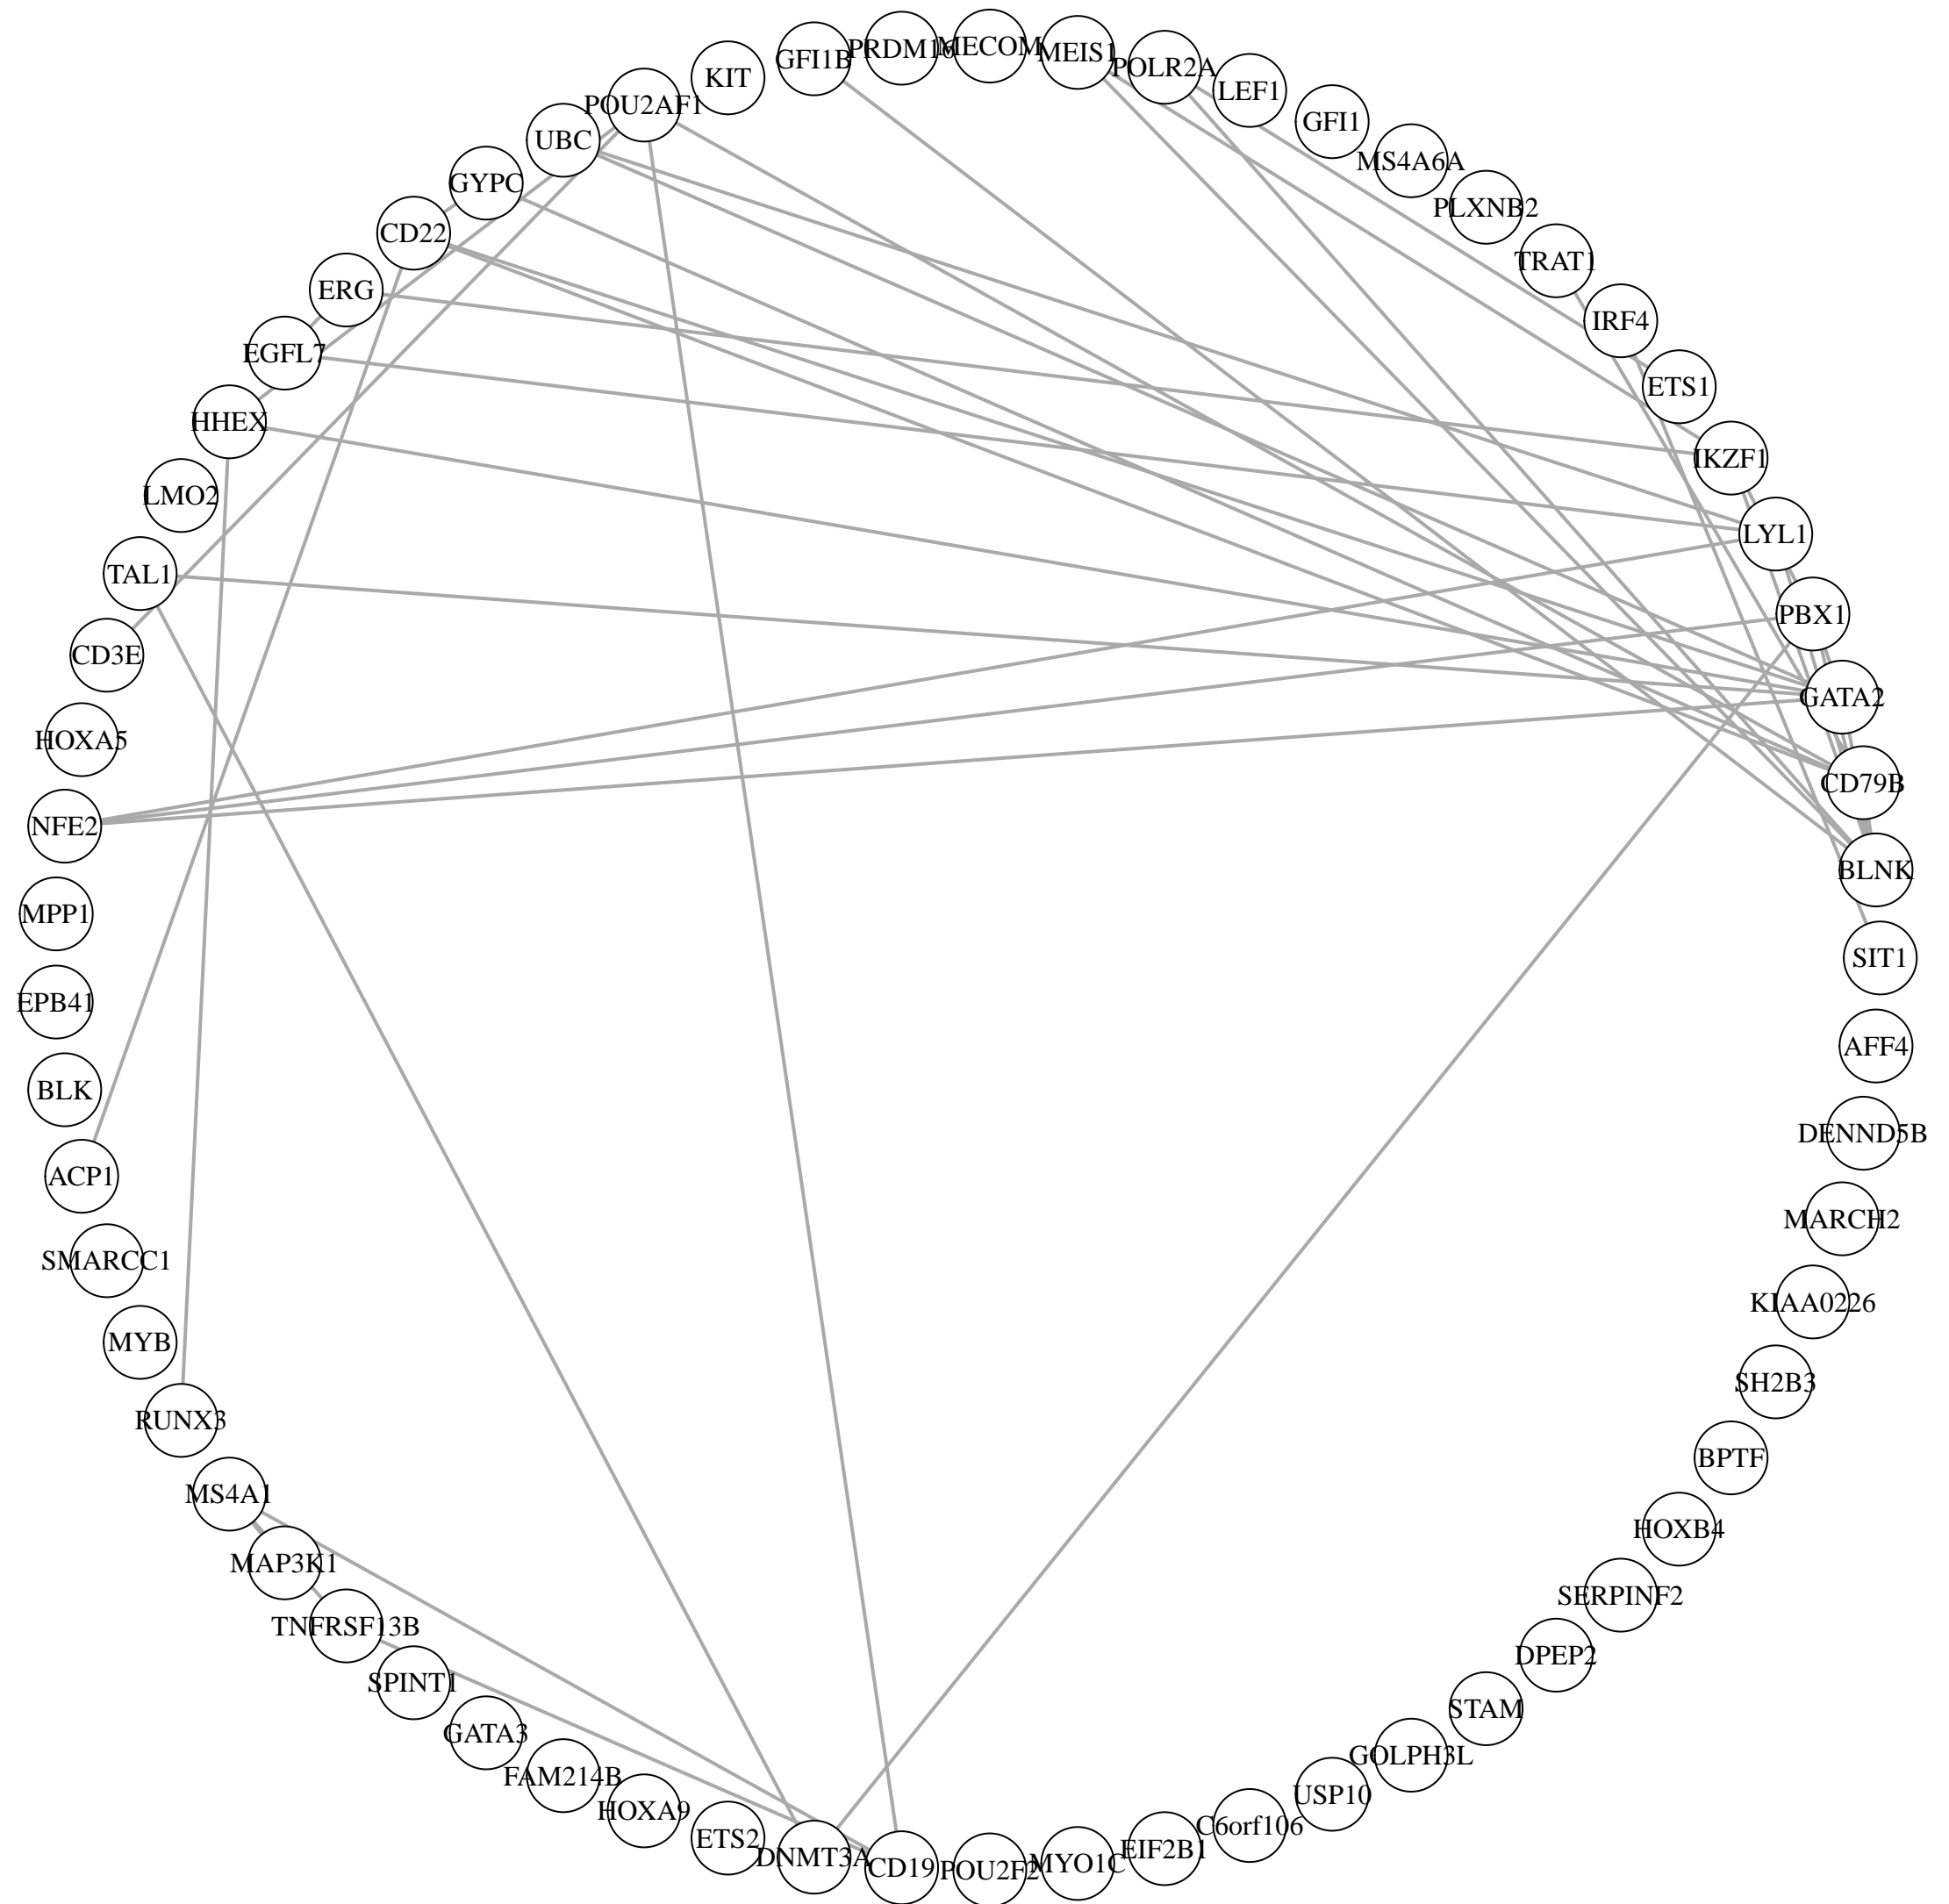

human\_HSCtoLMPP\_time 14

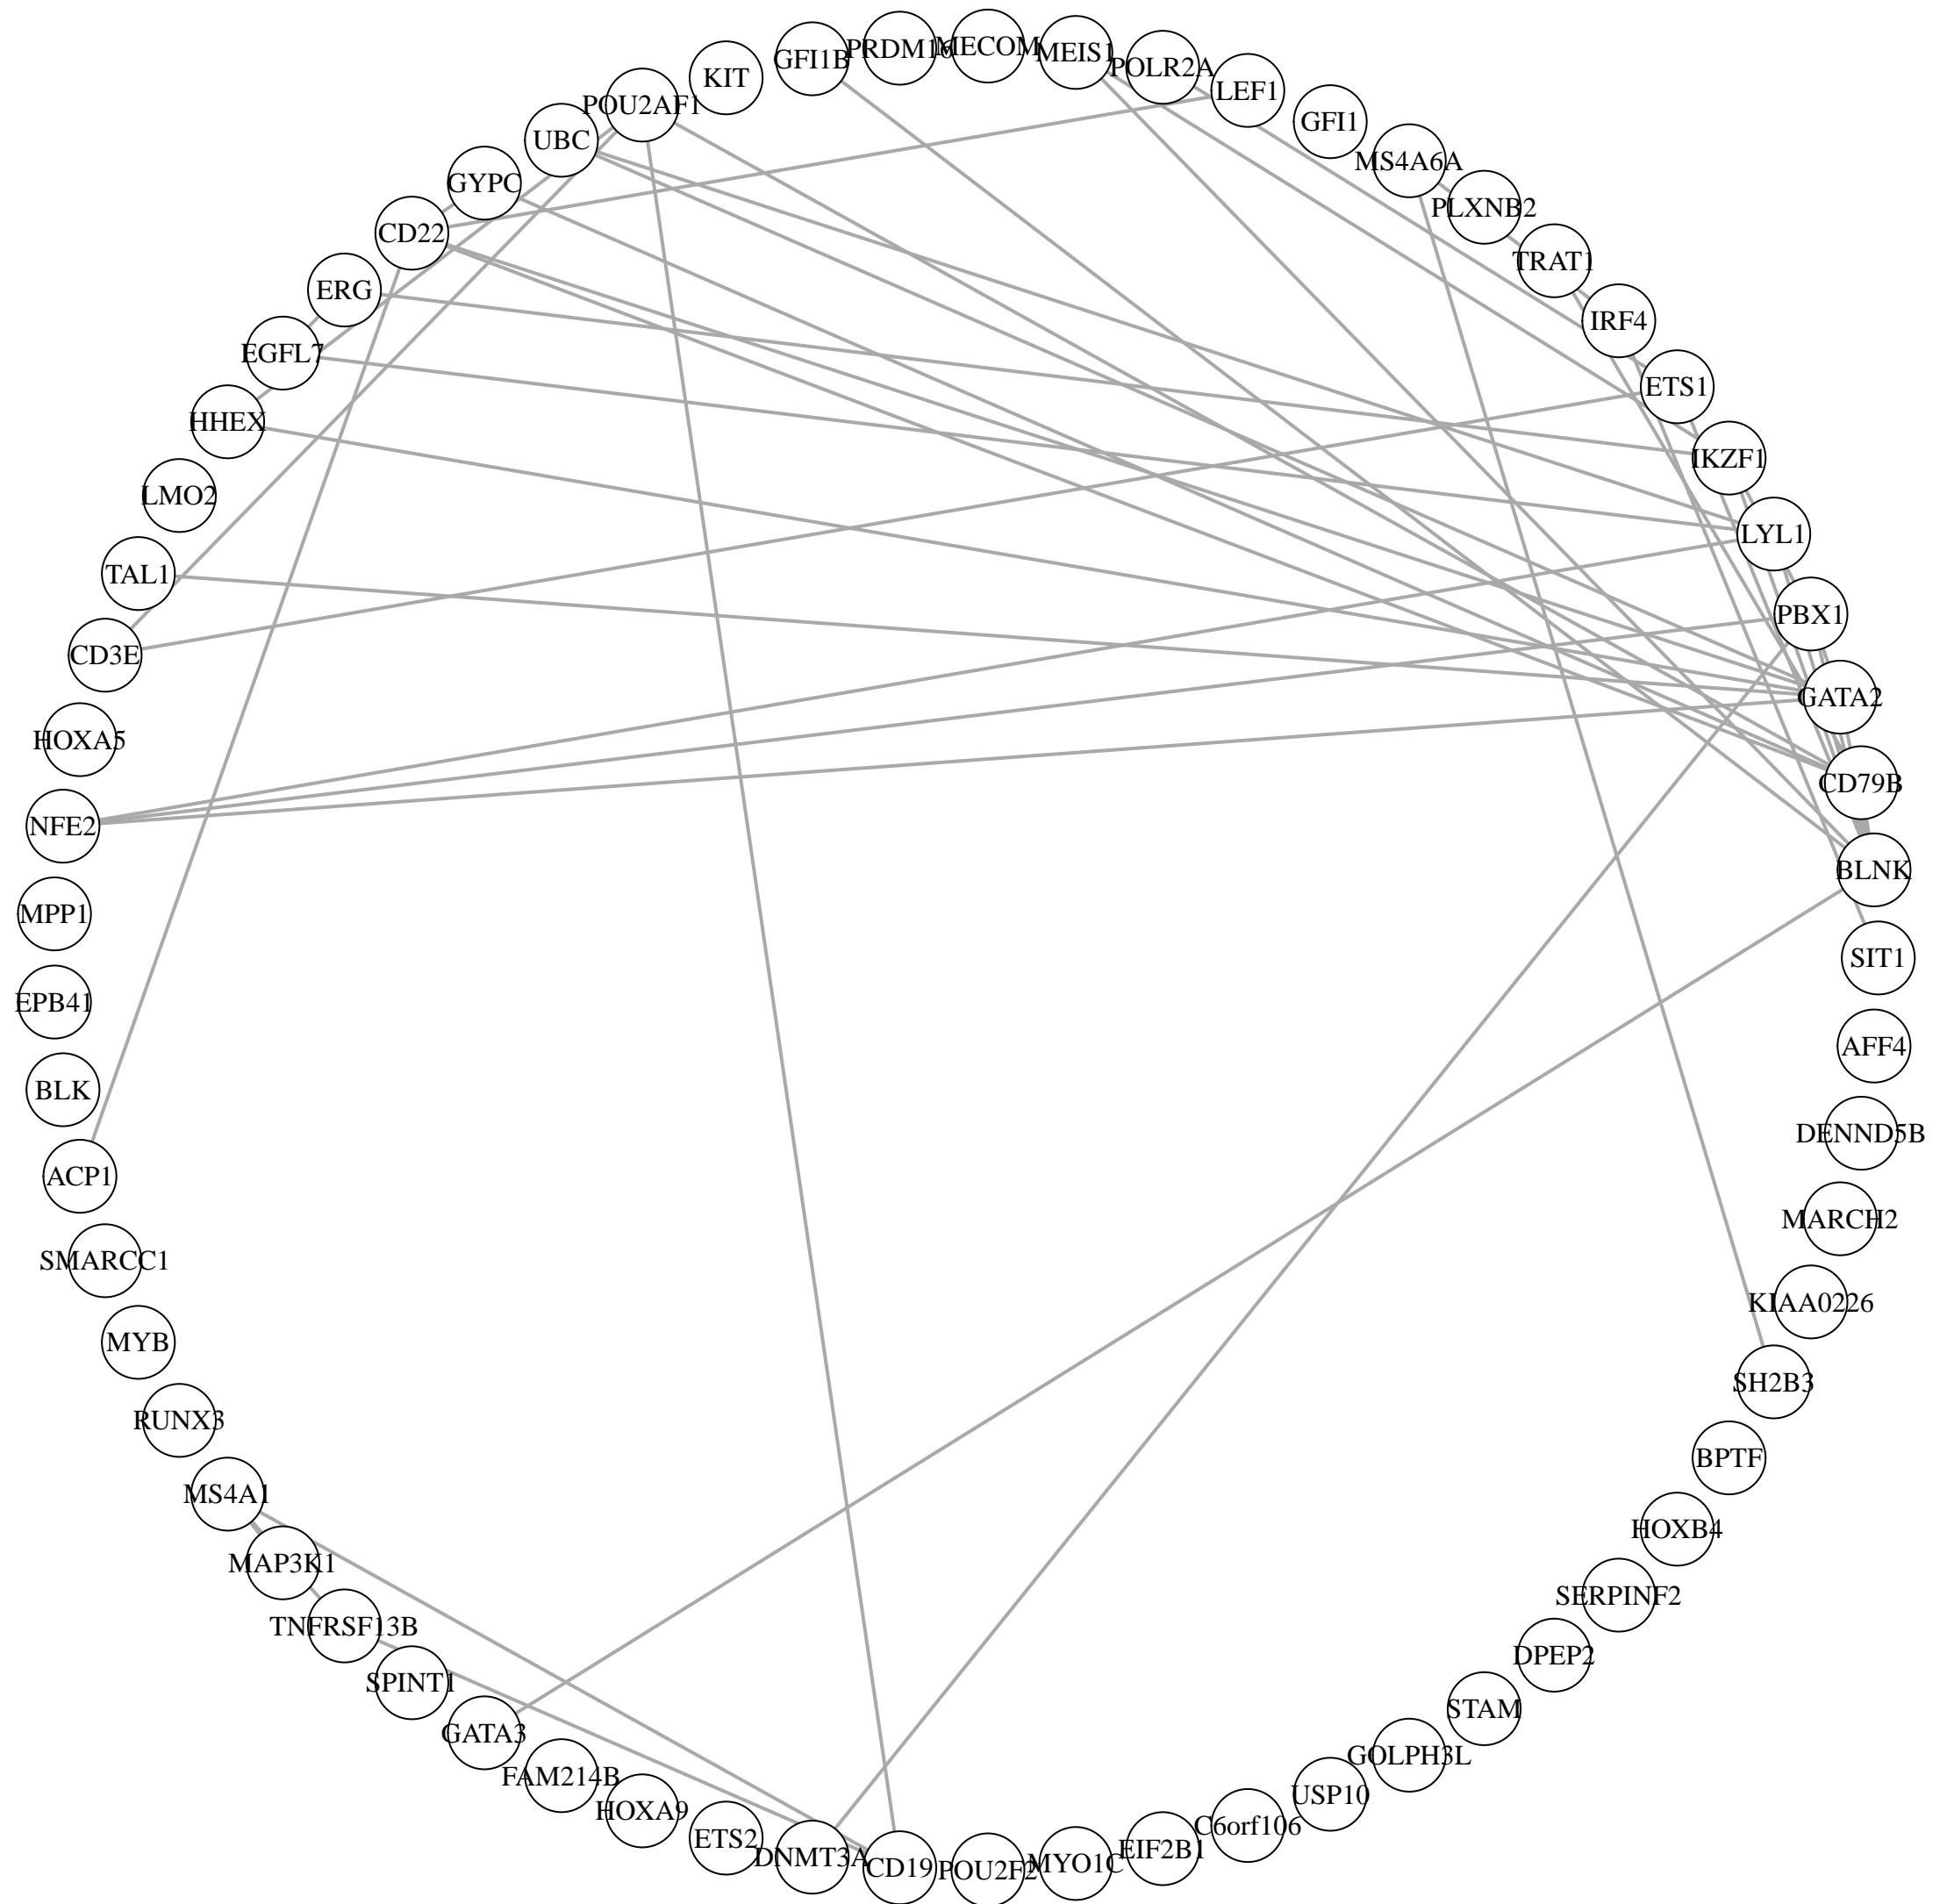

human\_HSCtoLMPP\_time 15

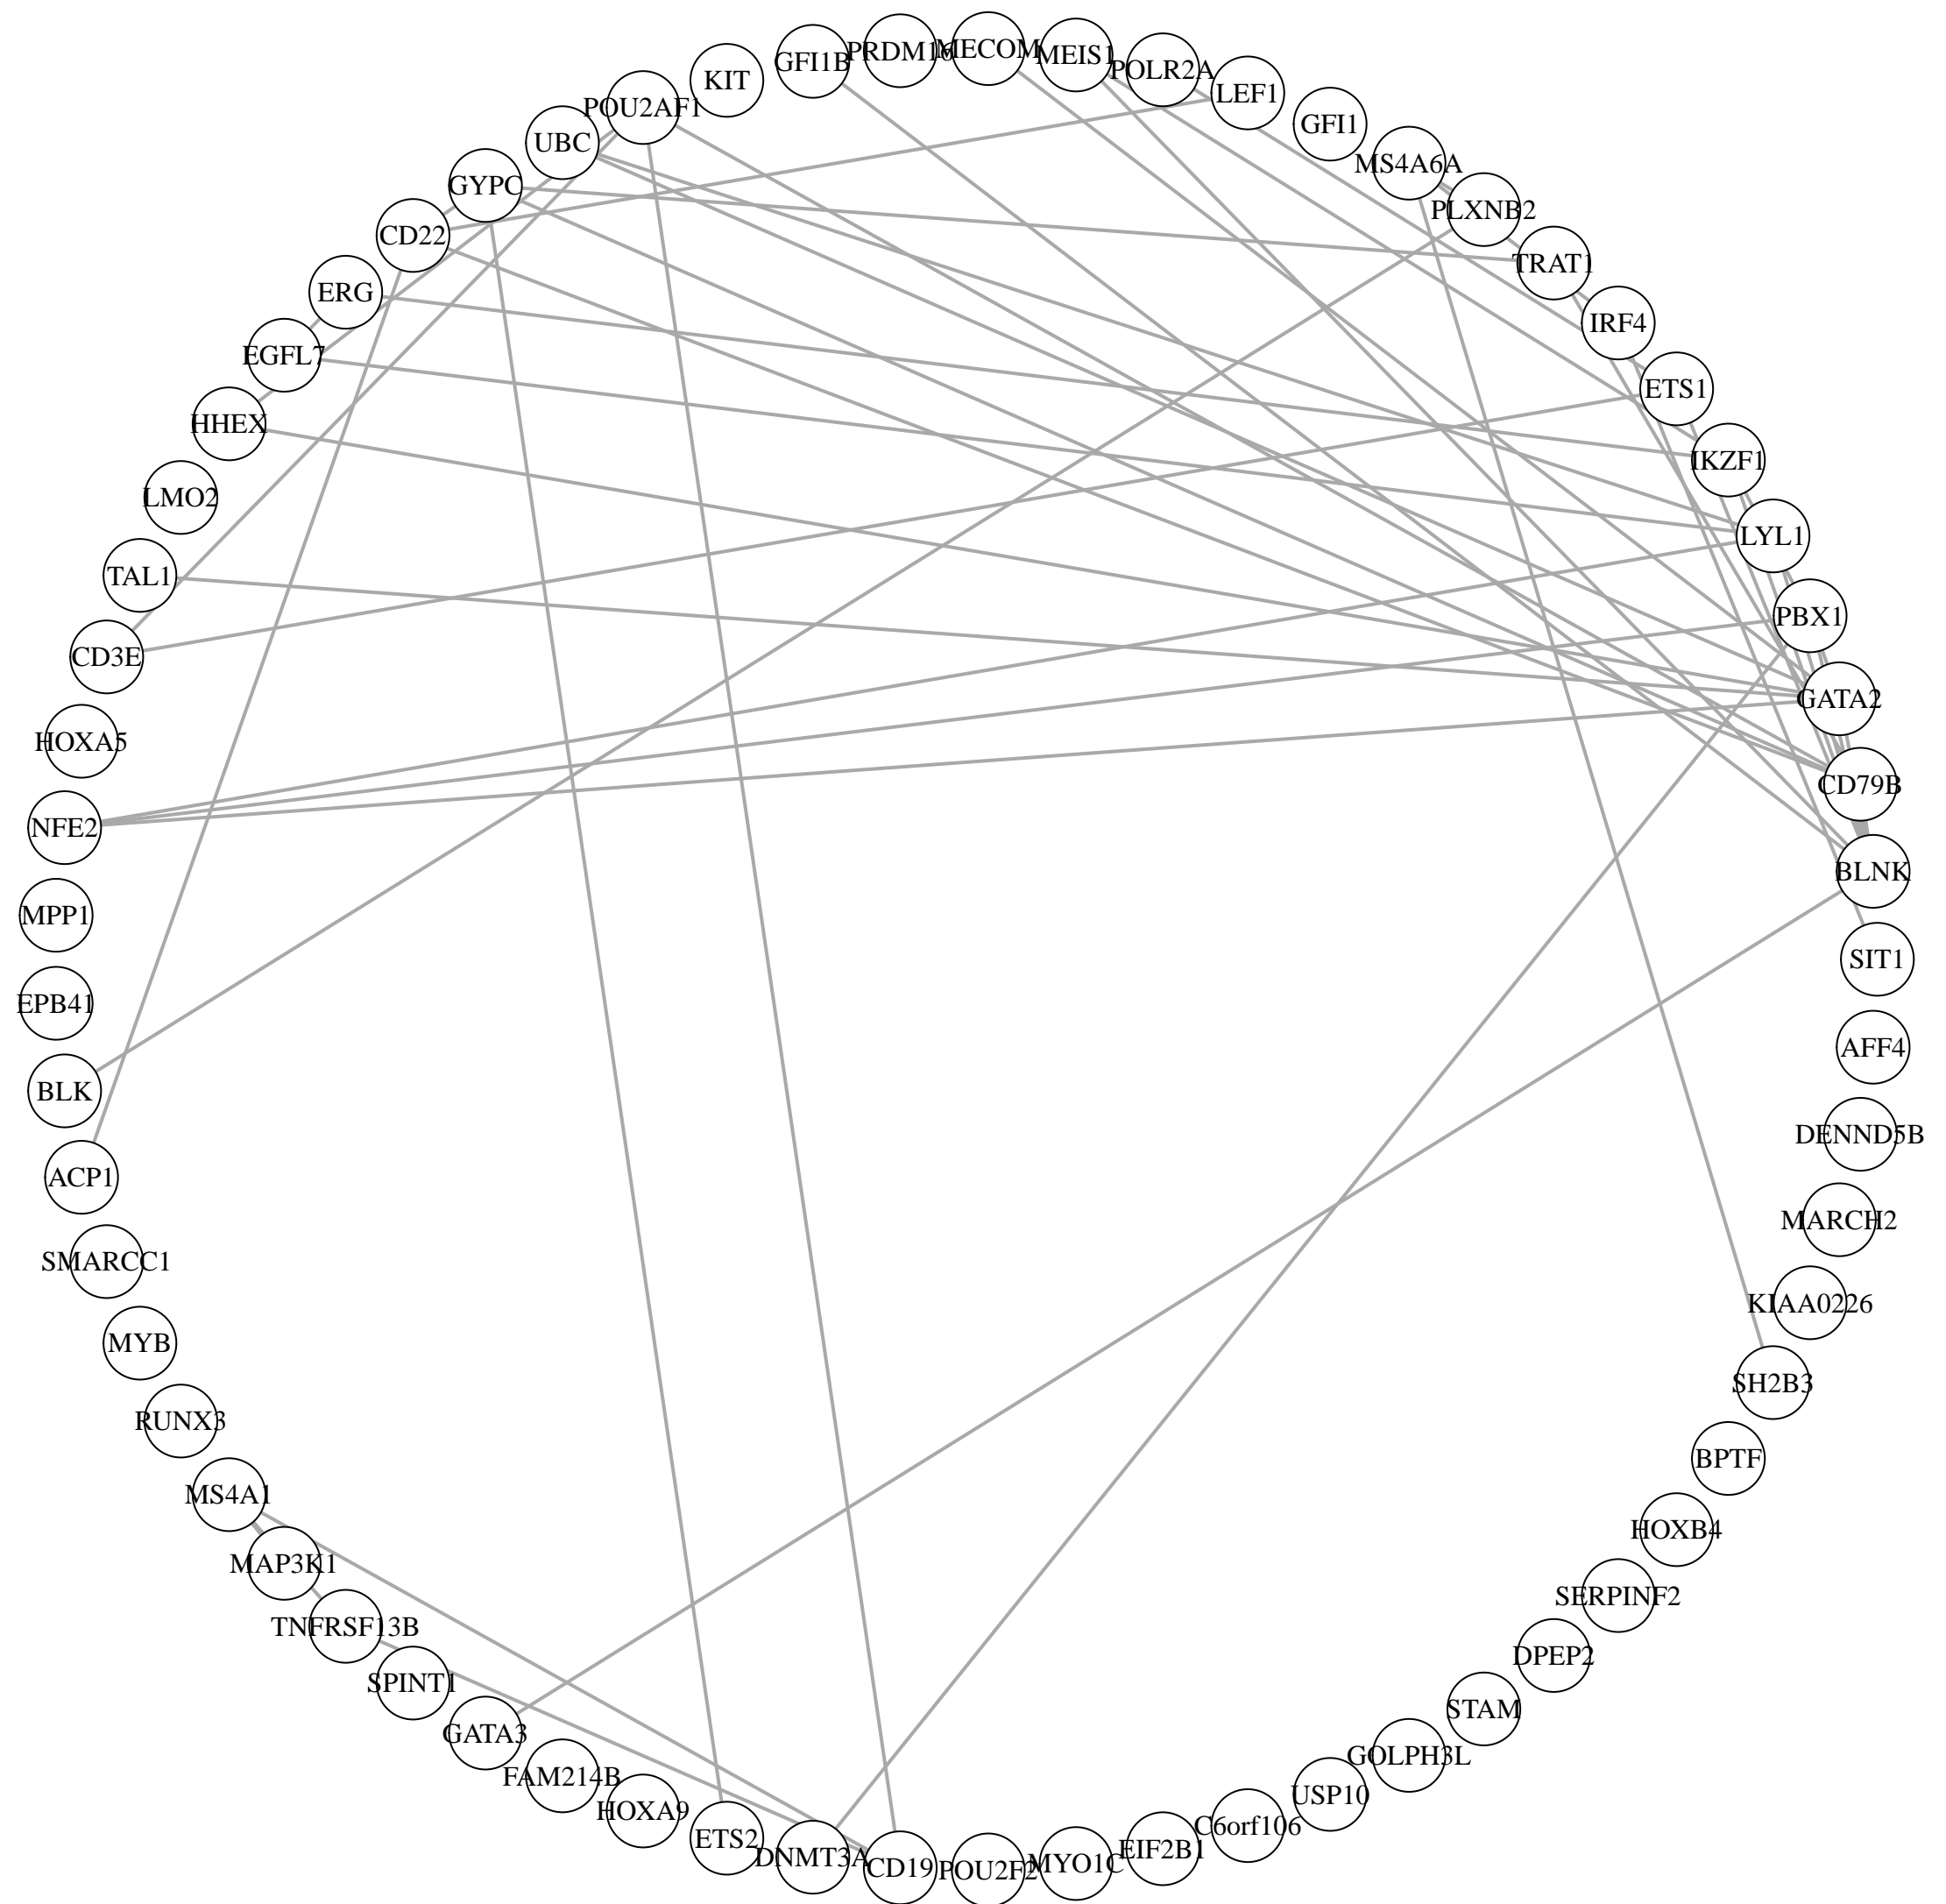



**human\_HSCtoLMPP\_time 16**

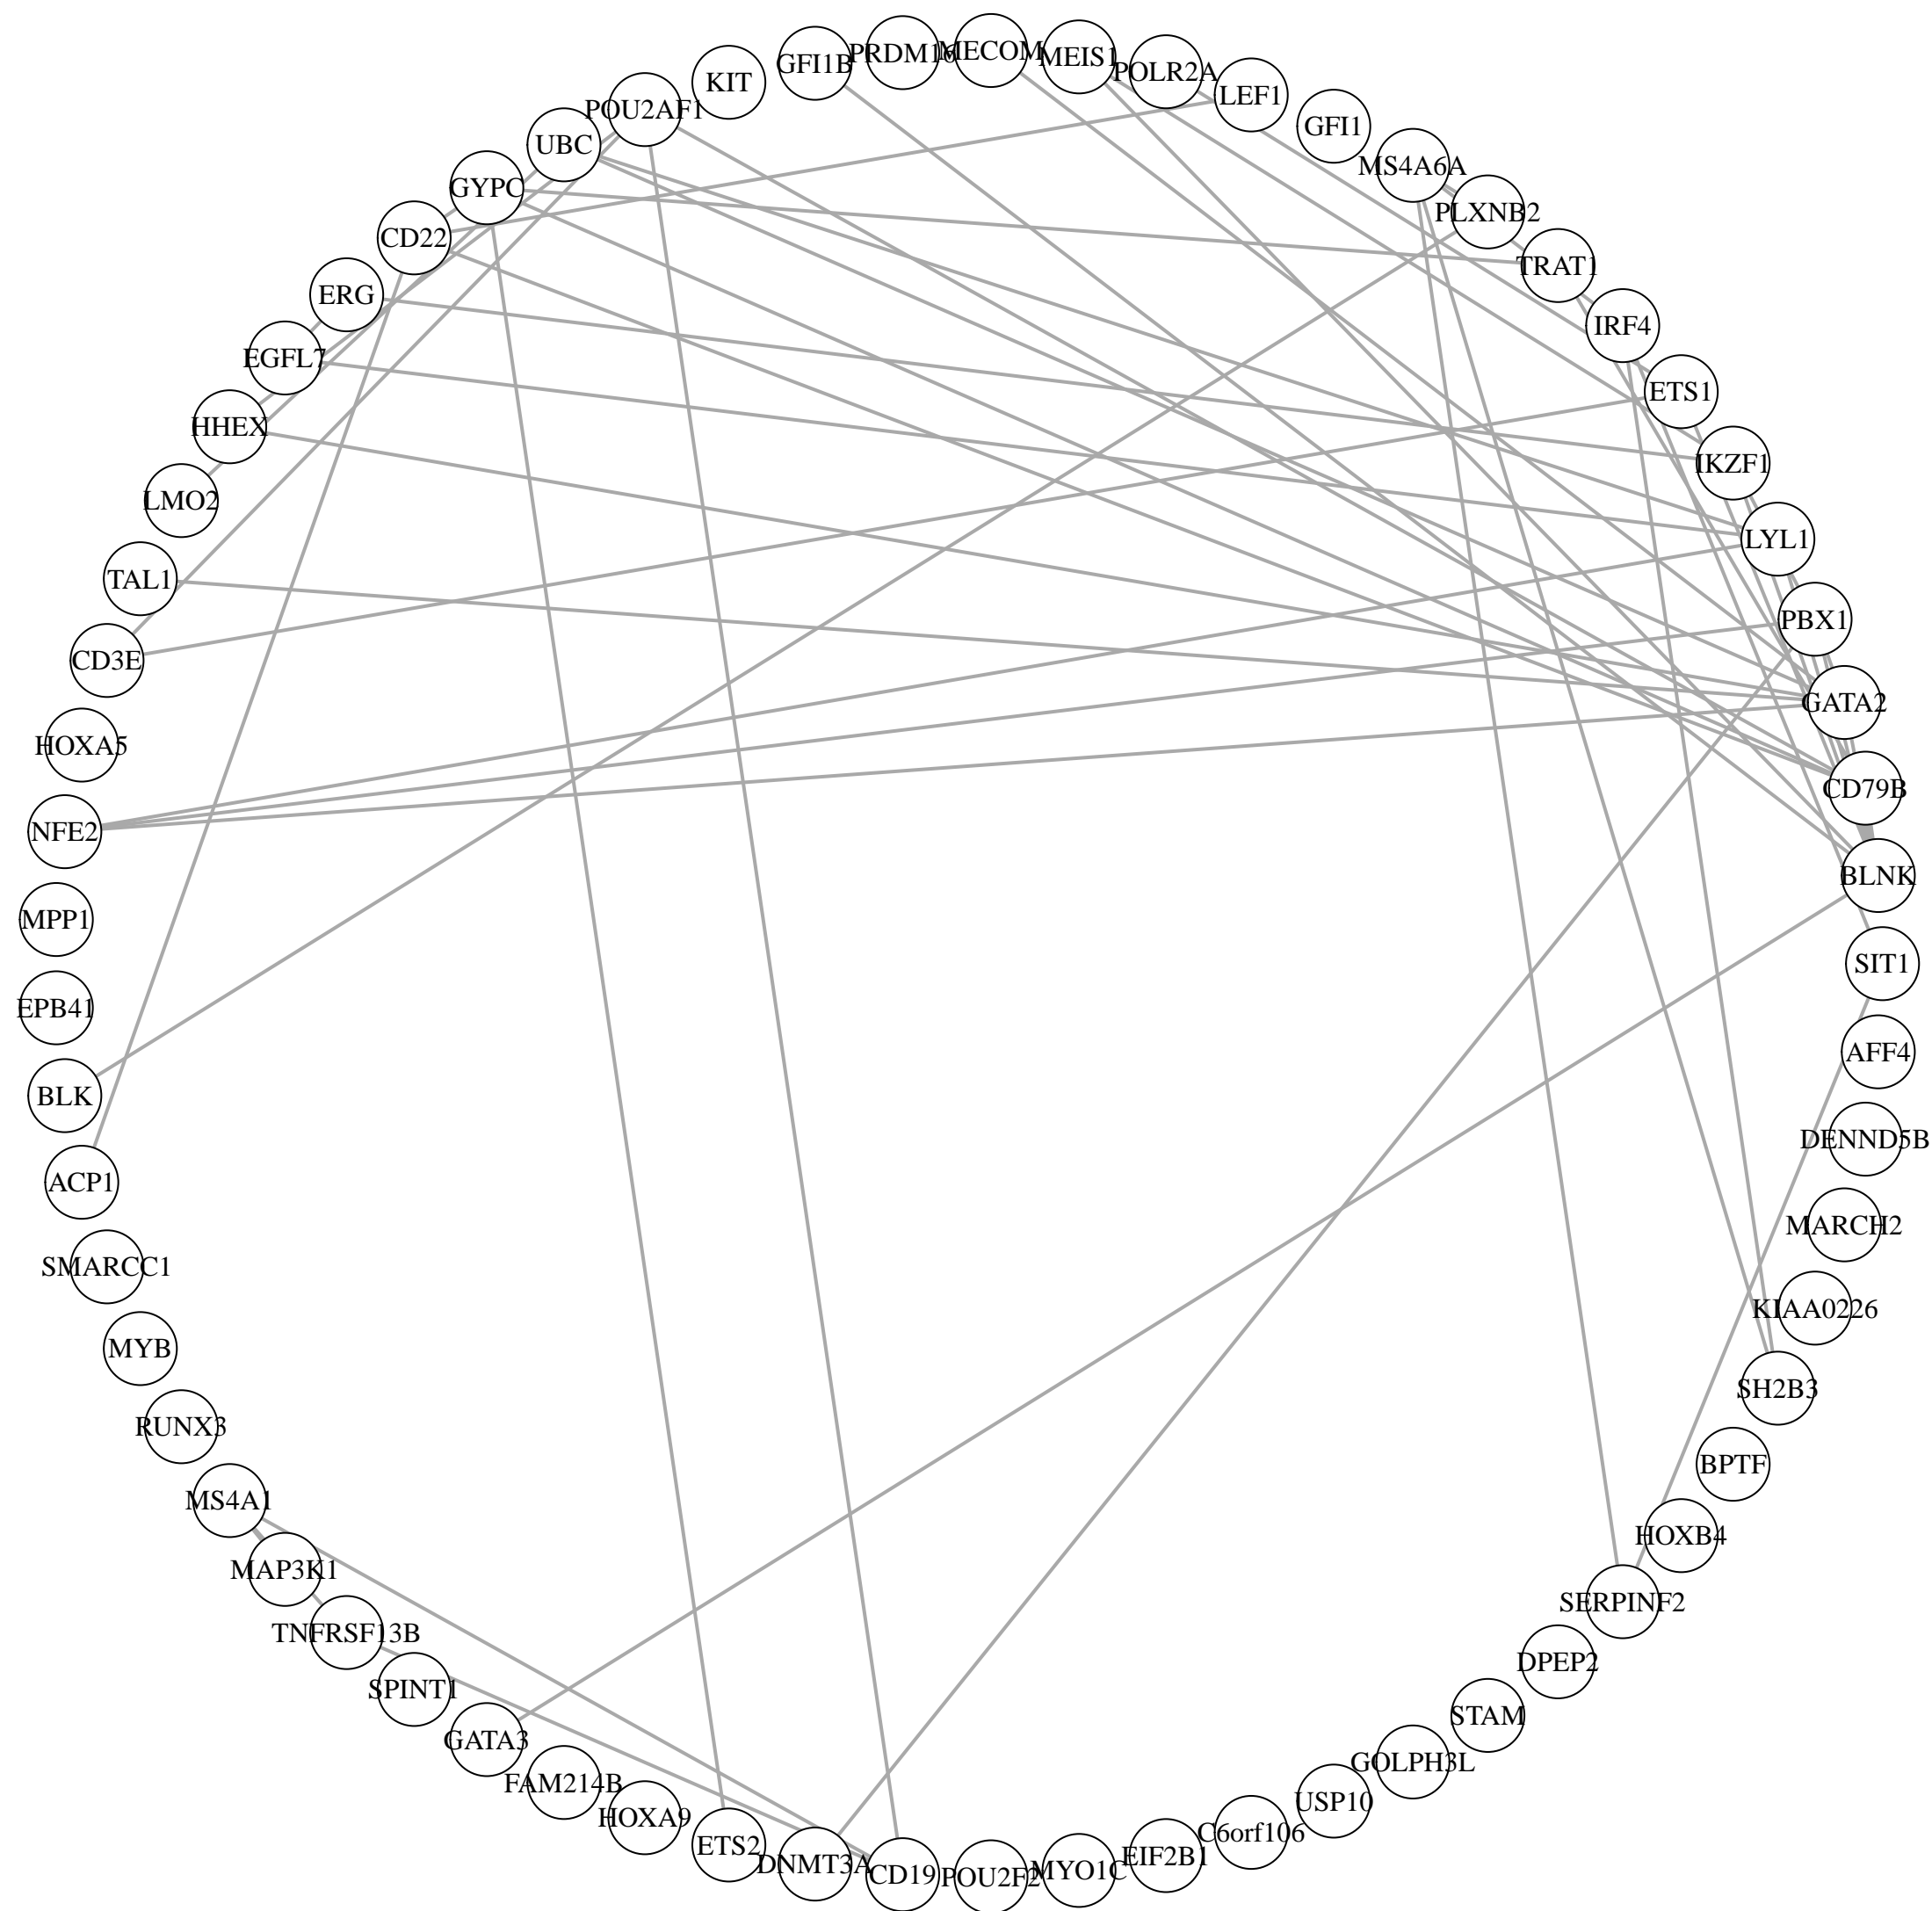

human\_HSCtoLMPP\_time 17

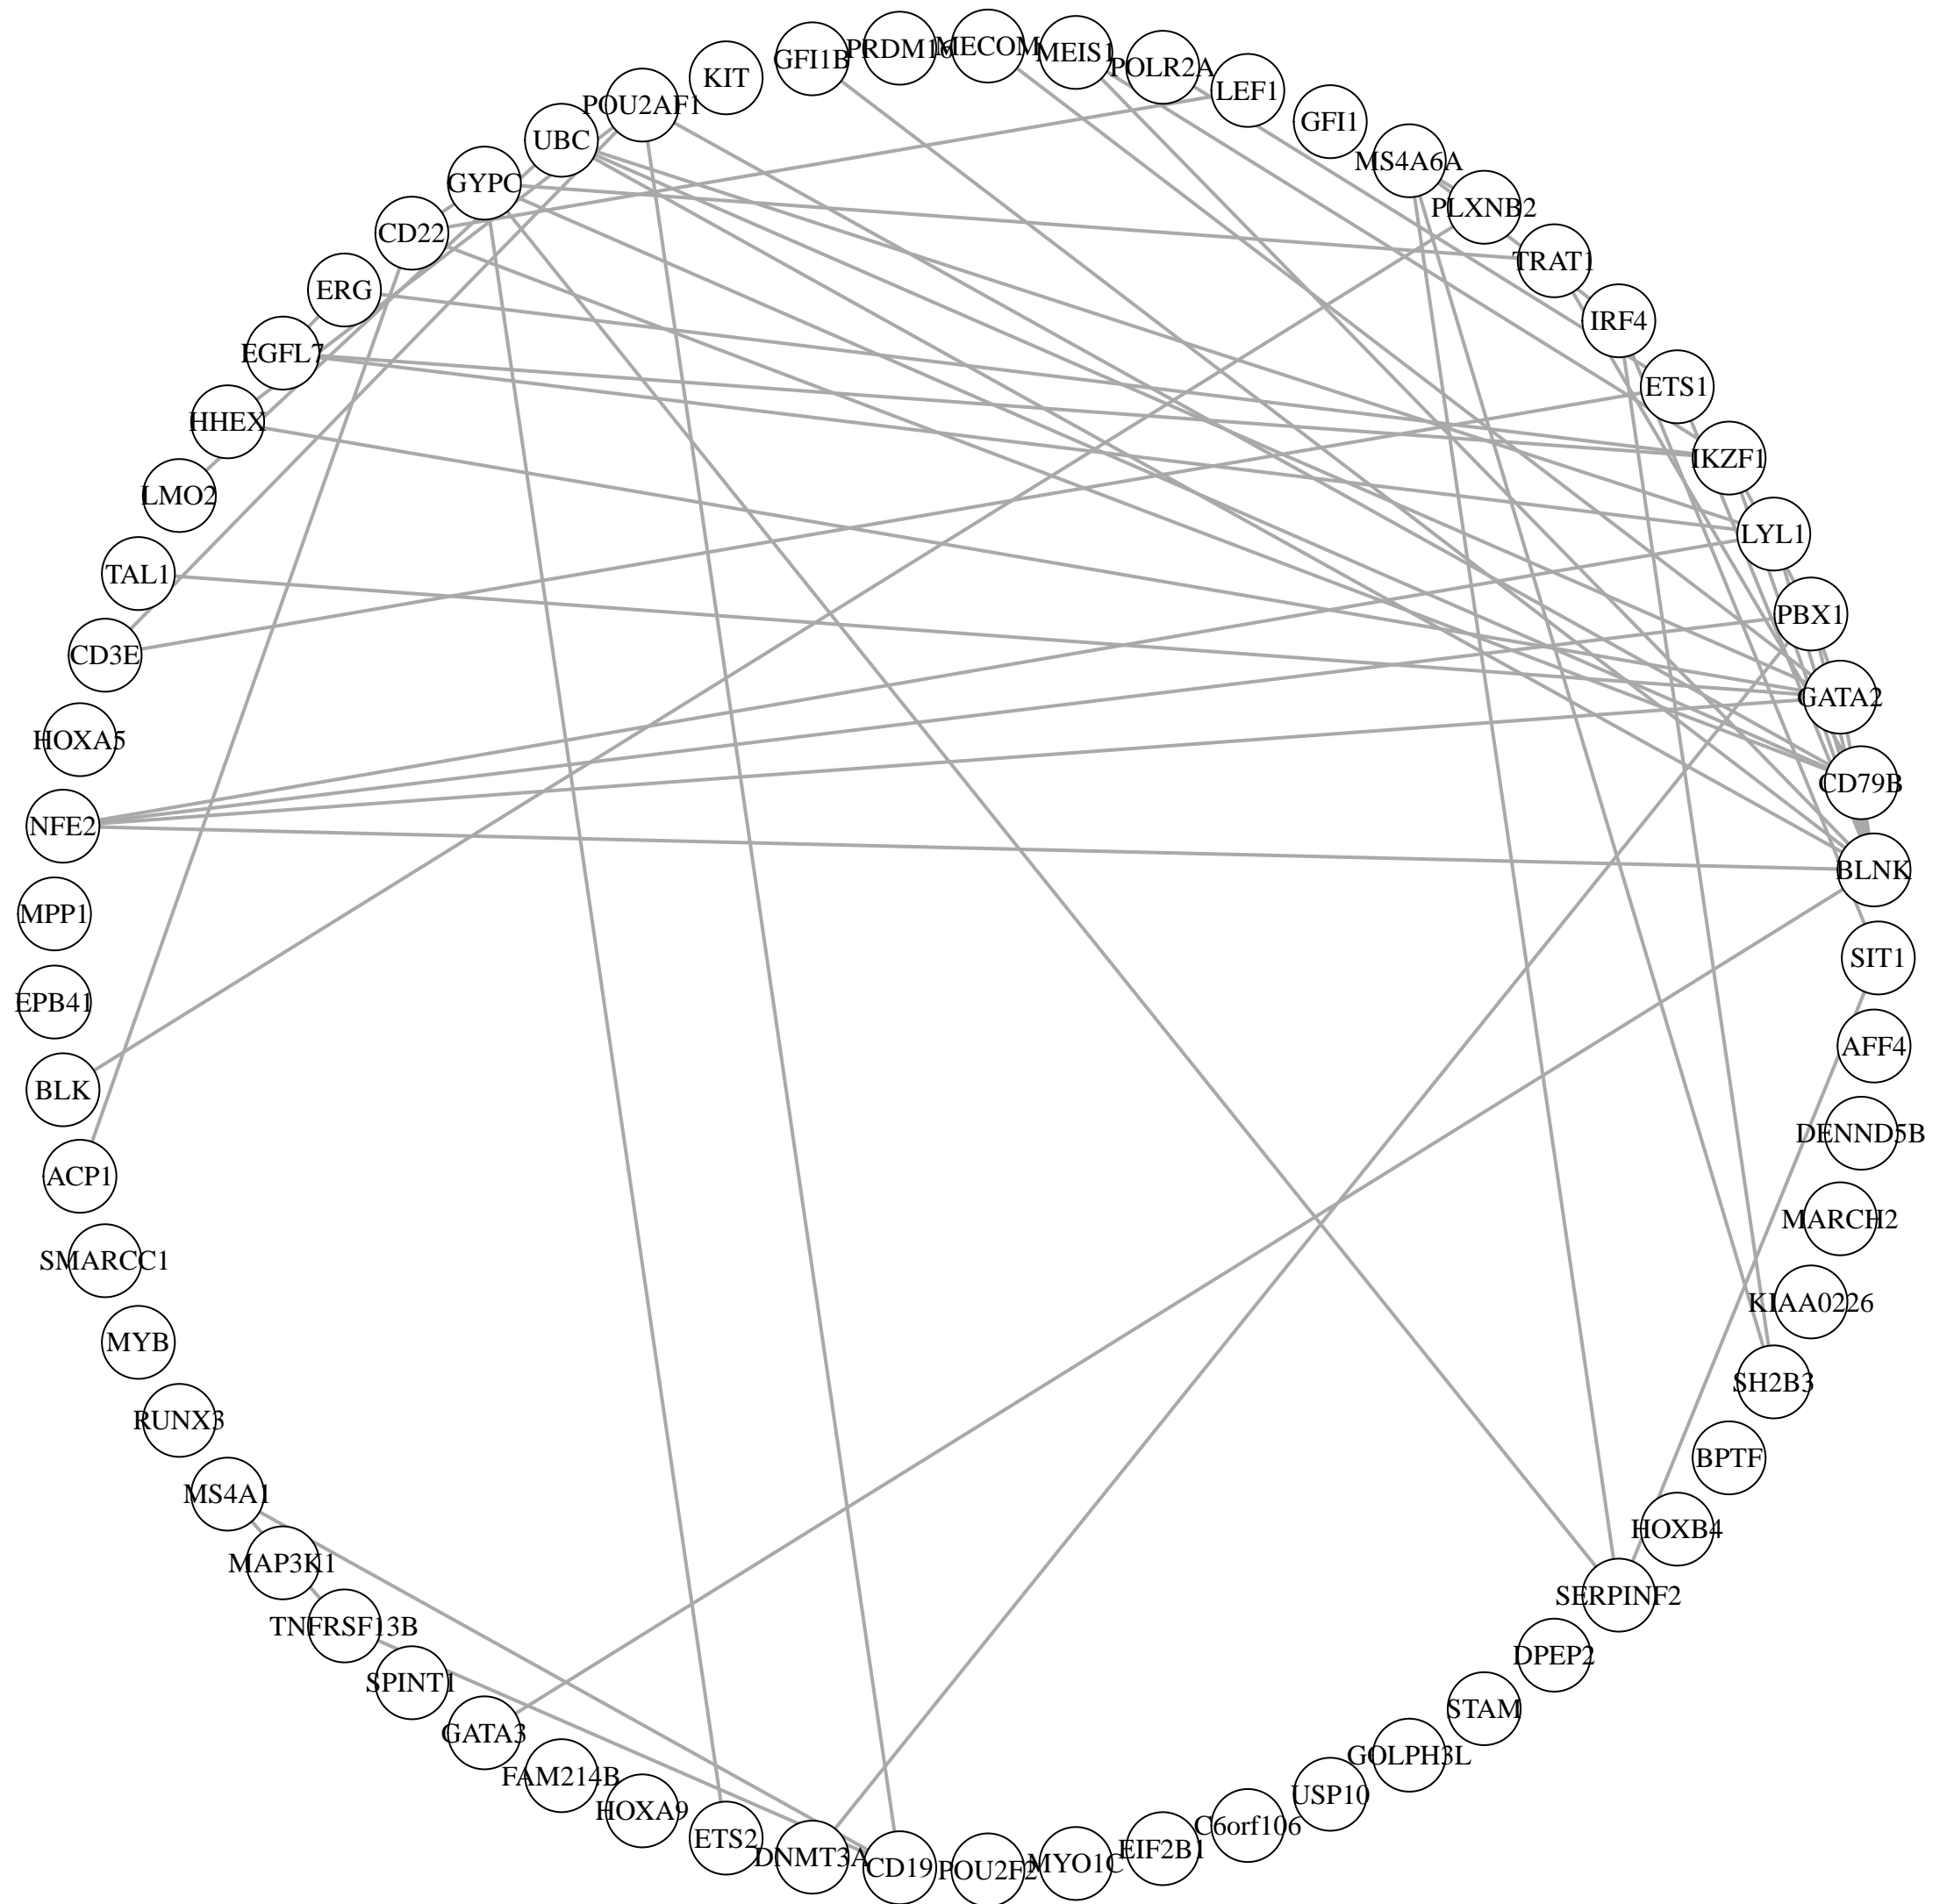

human\_HSCtoLMPP\_time 18

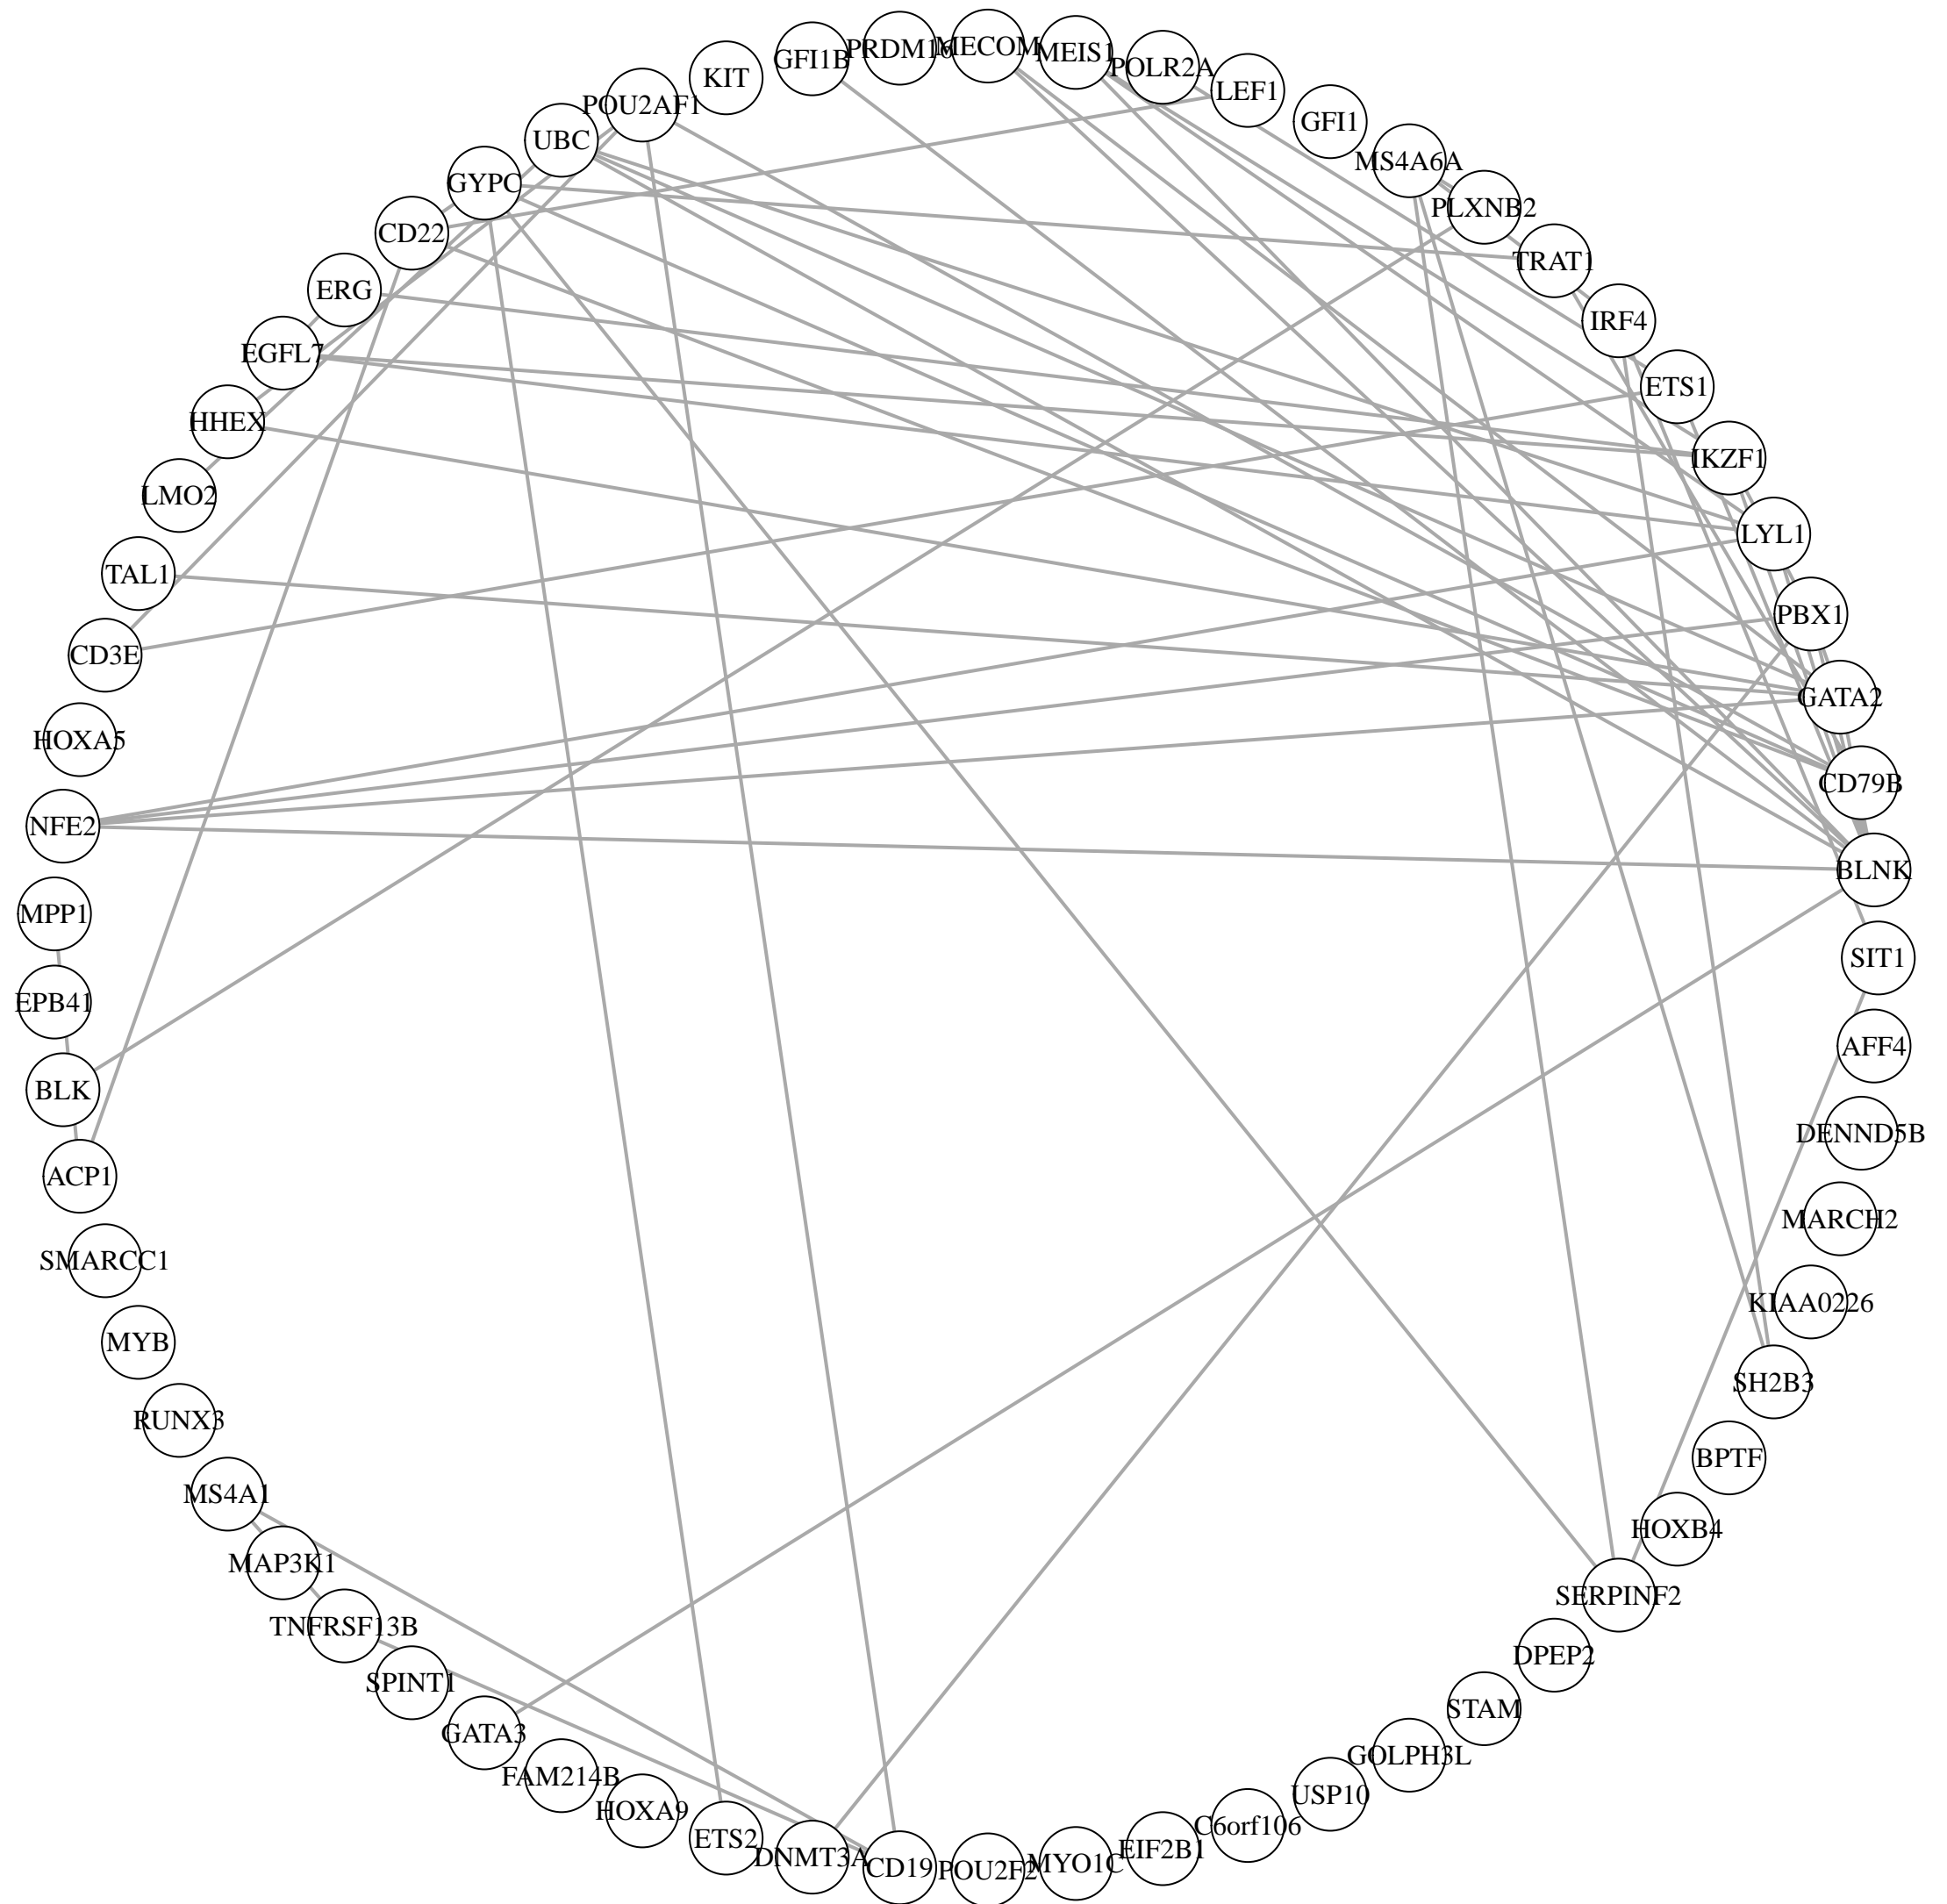

human\_HSCtoLMPP\_time 19

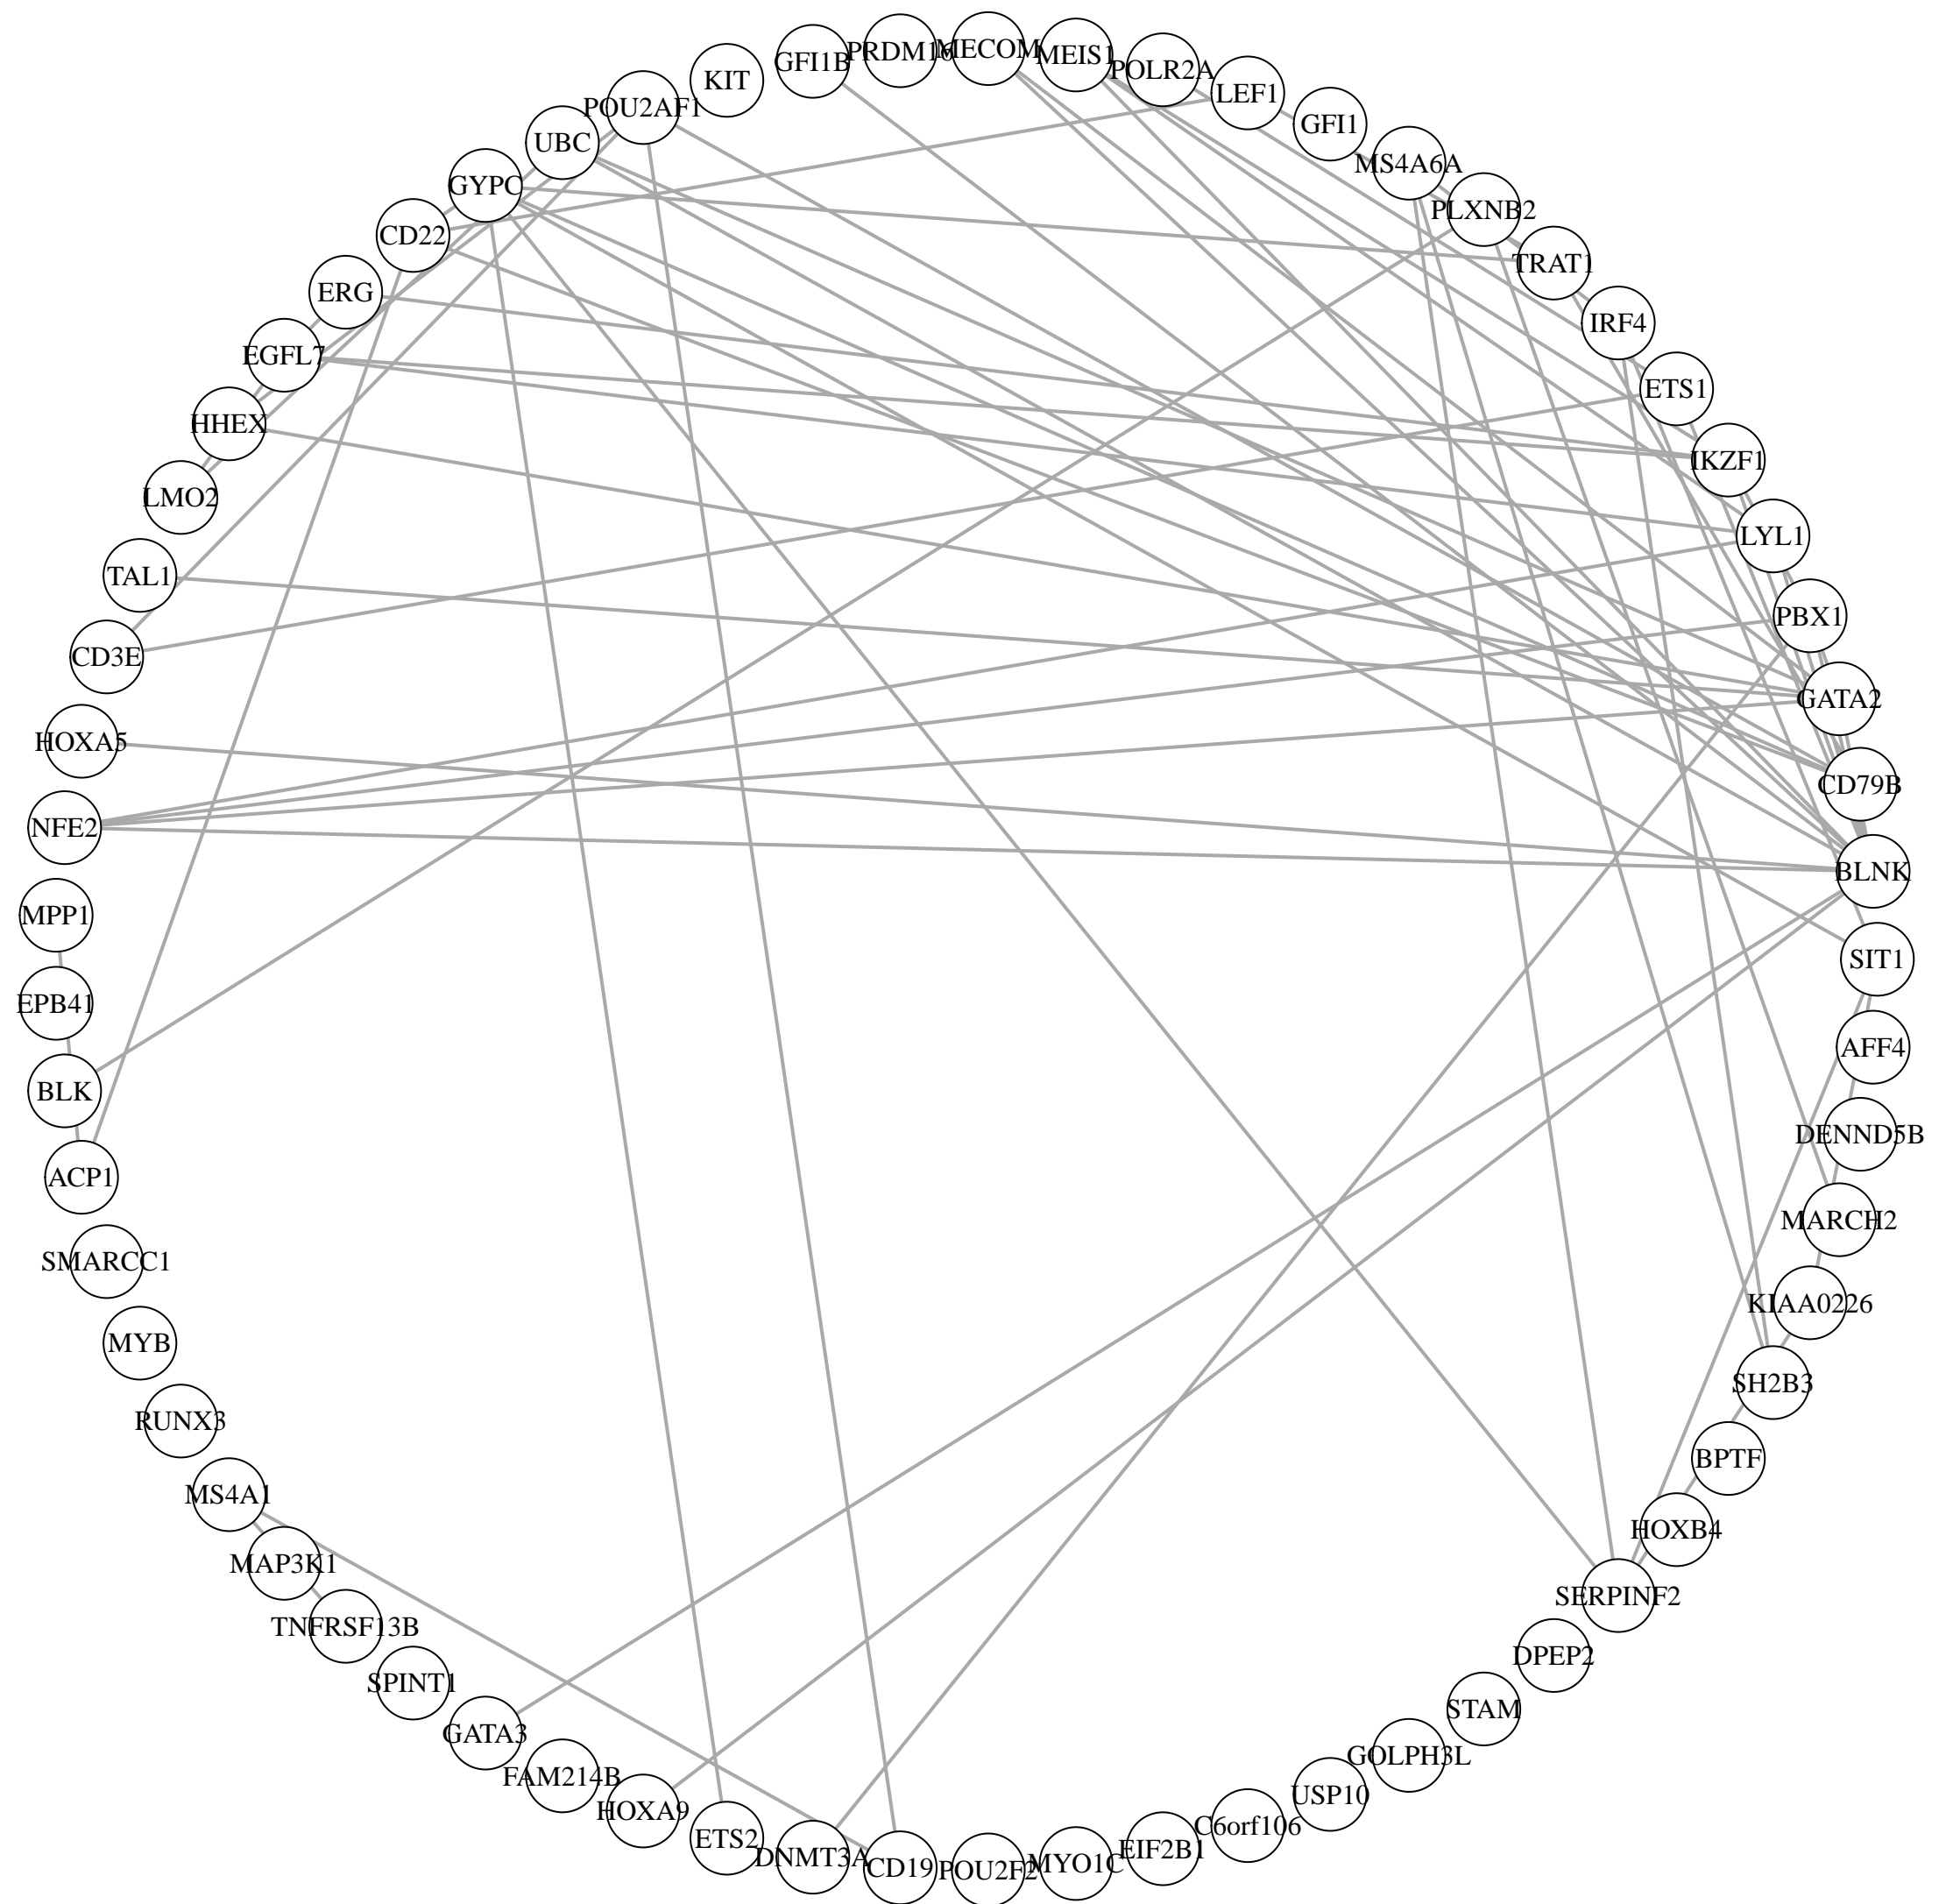

human\_HSCtoLMPP\_time 20

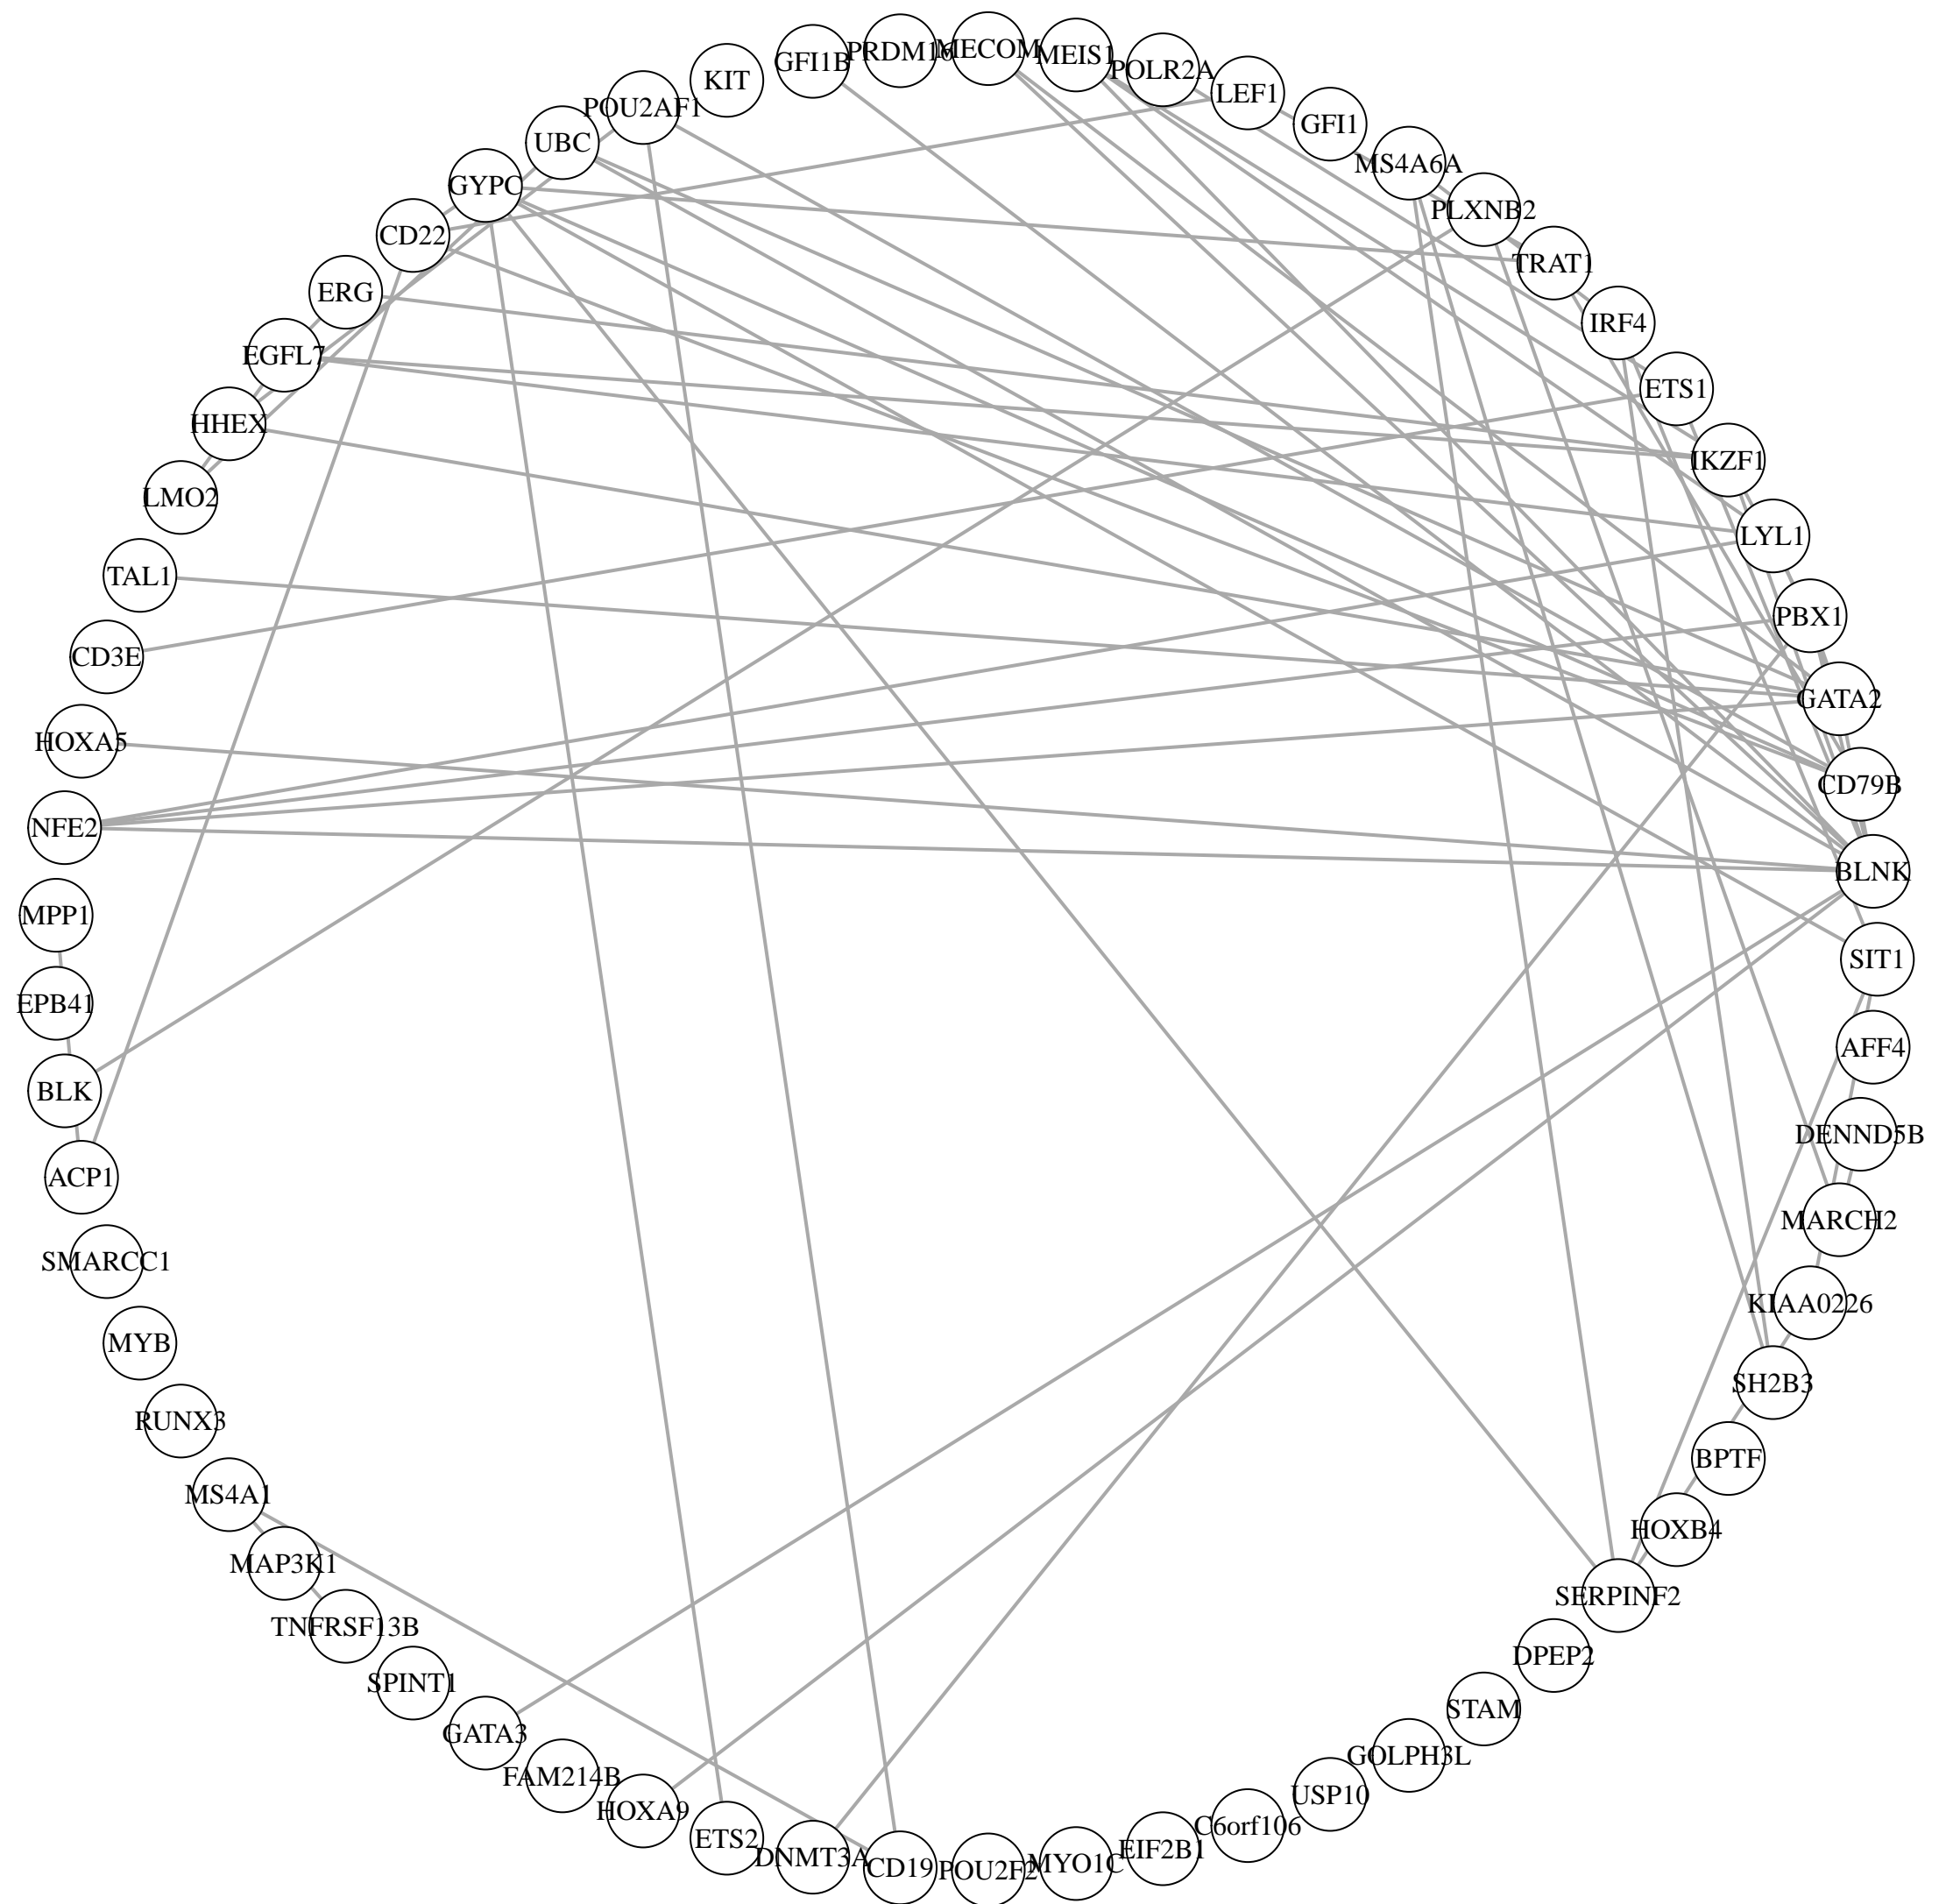

human\_HSCtoLMPP\_time 21

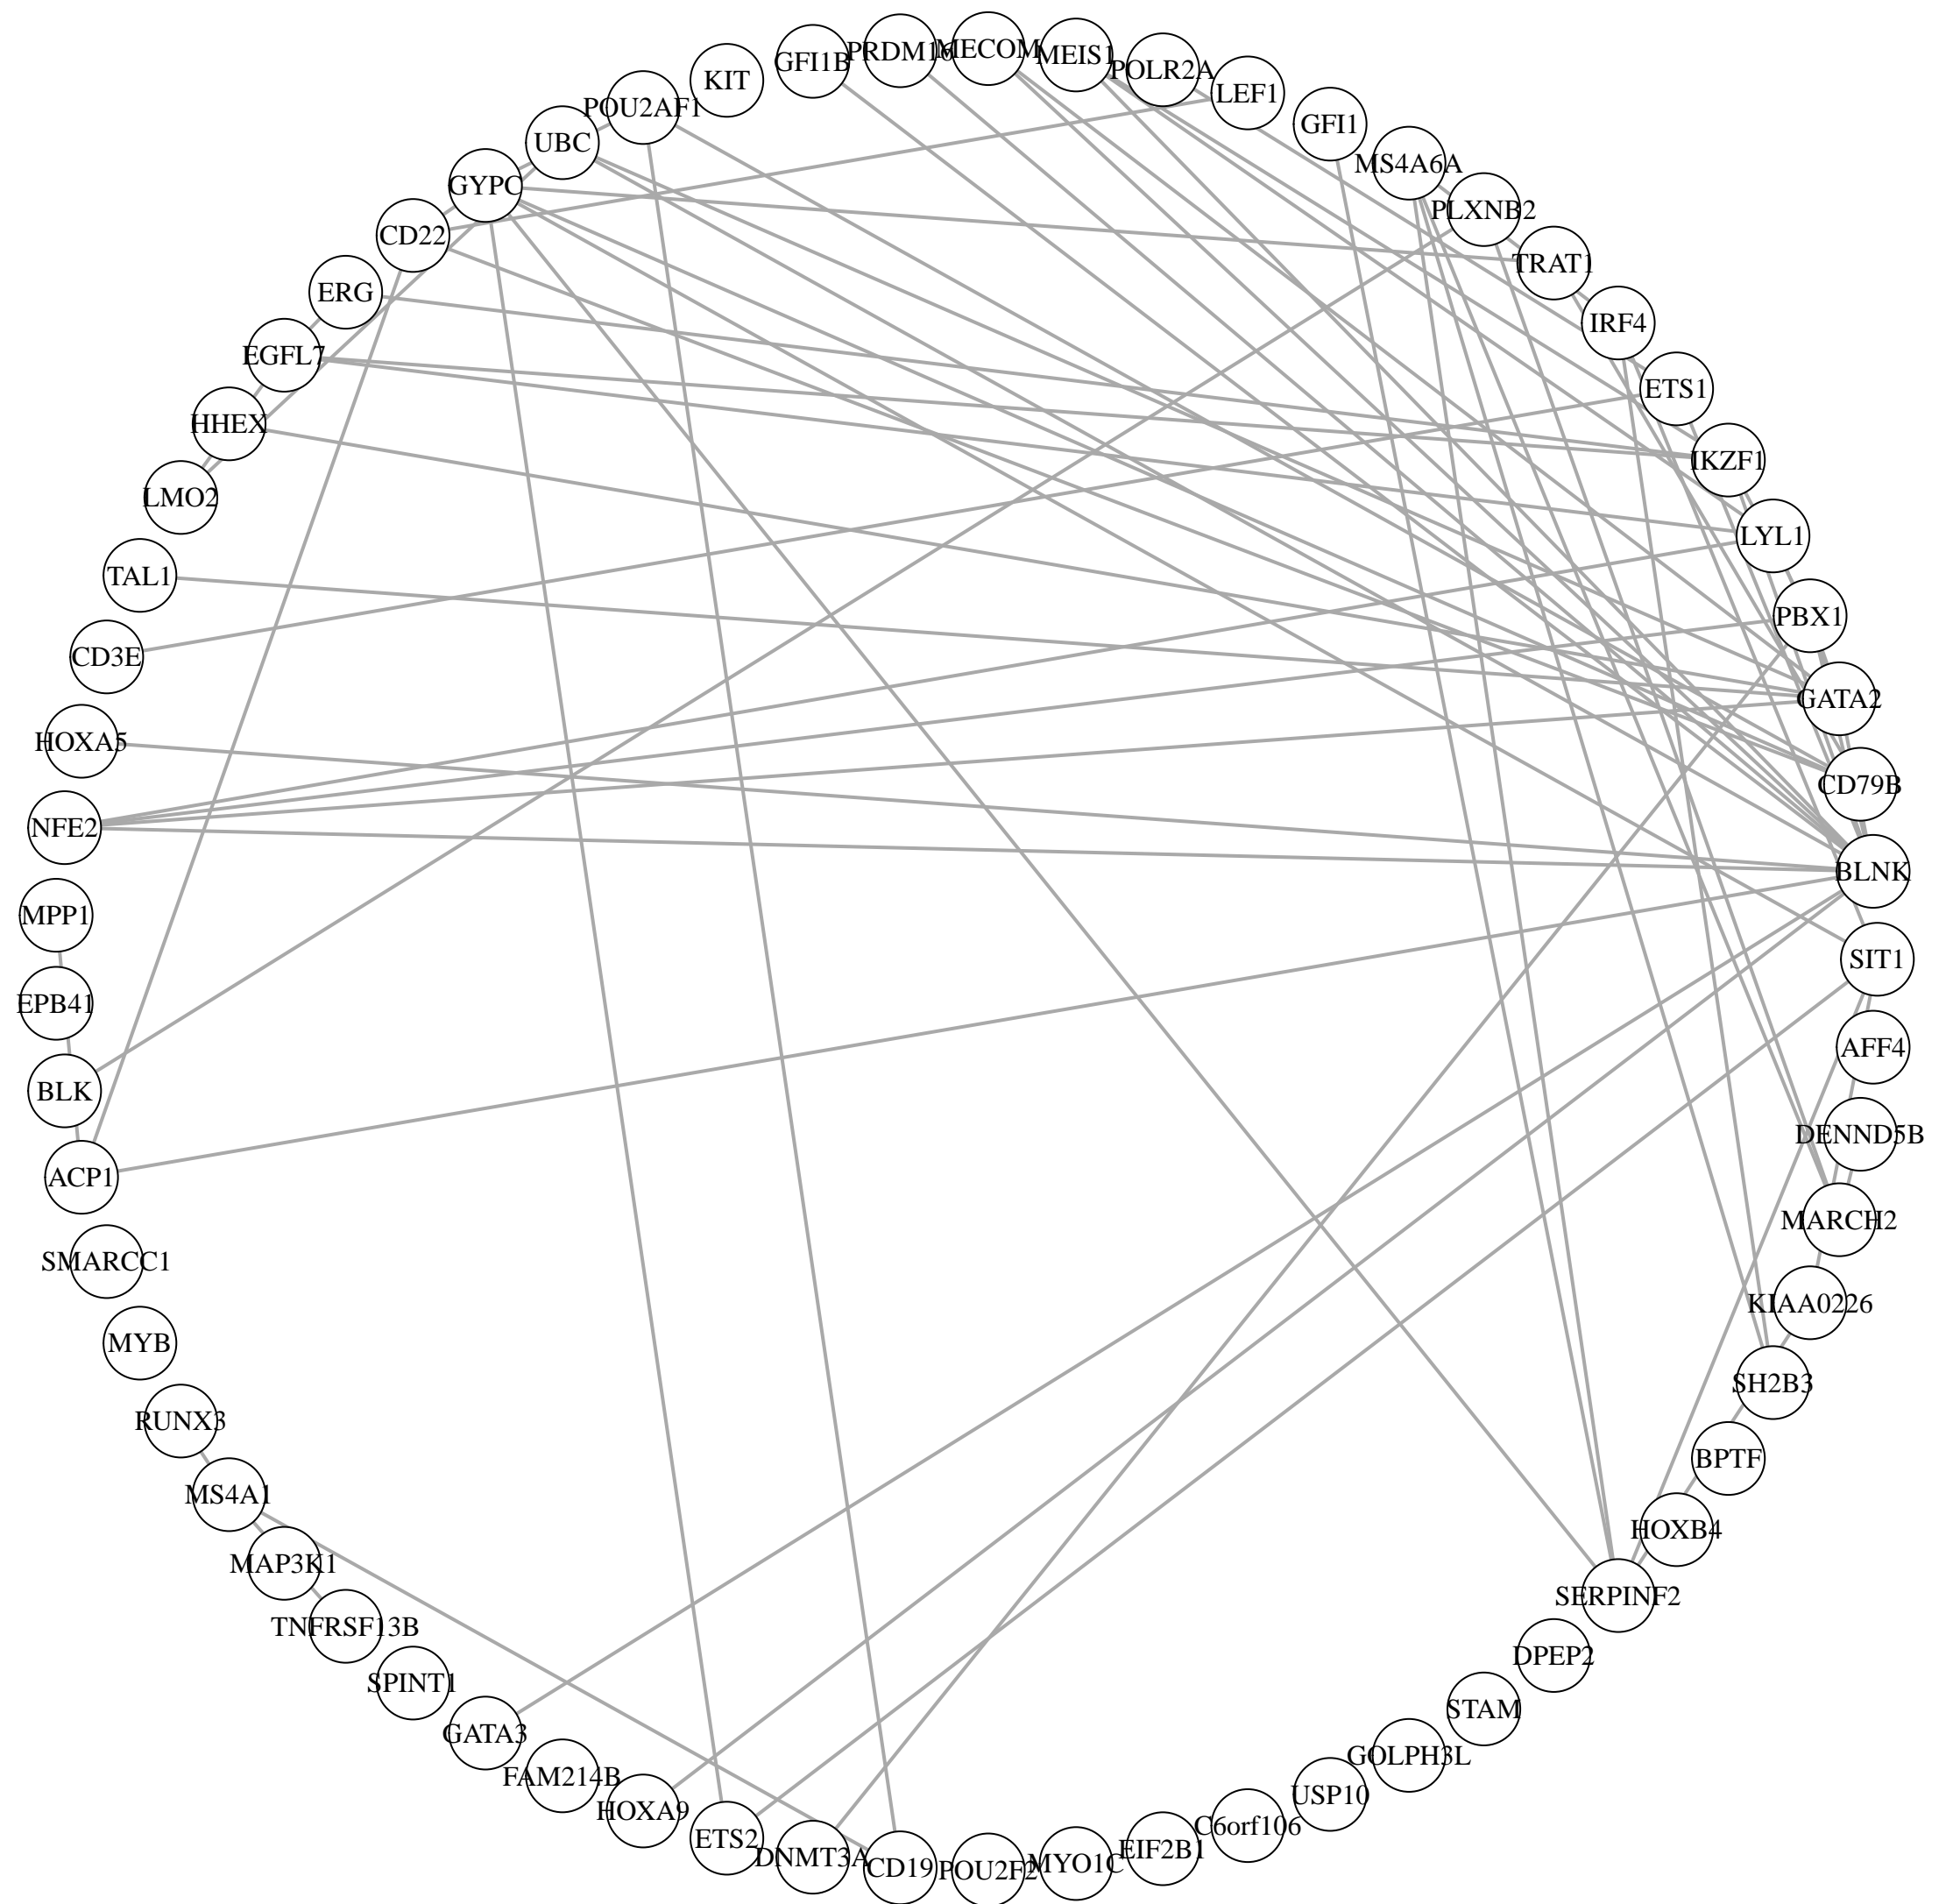



human\_HSCtoLMPP\_time 22

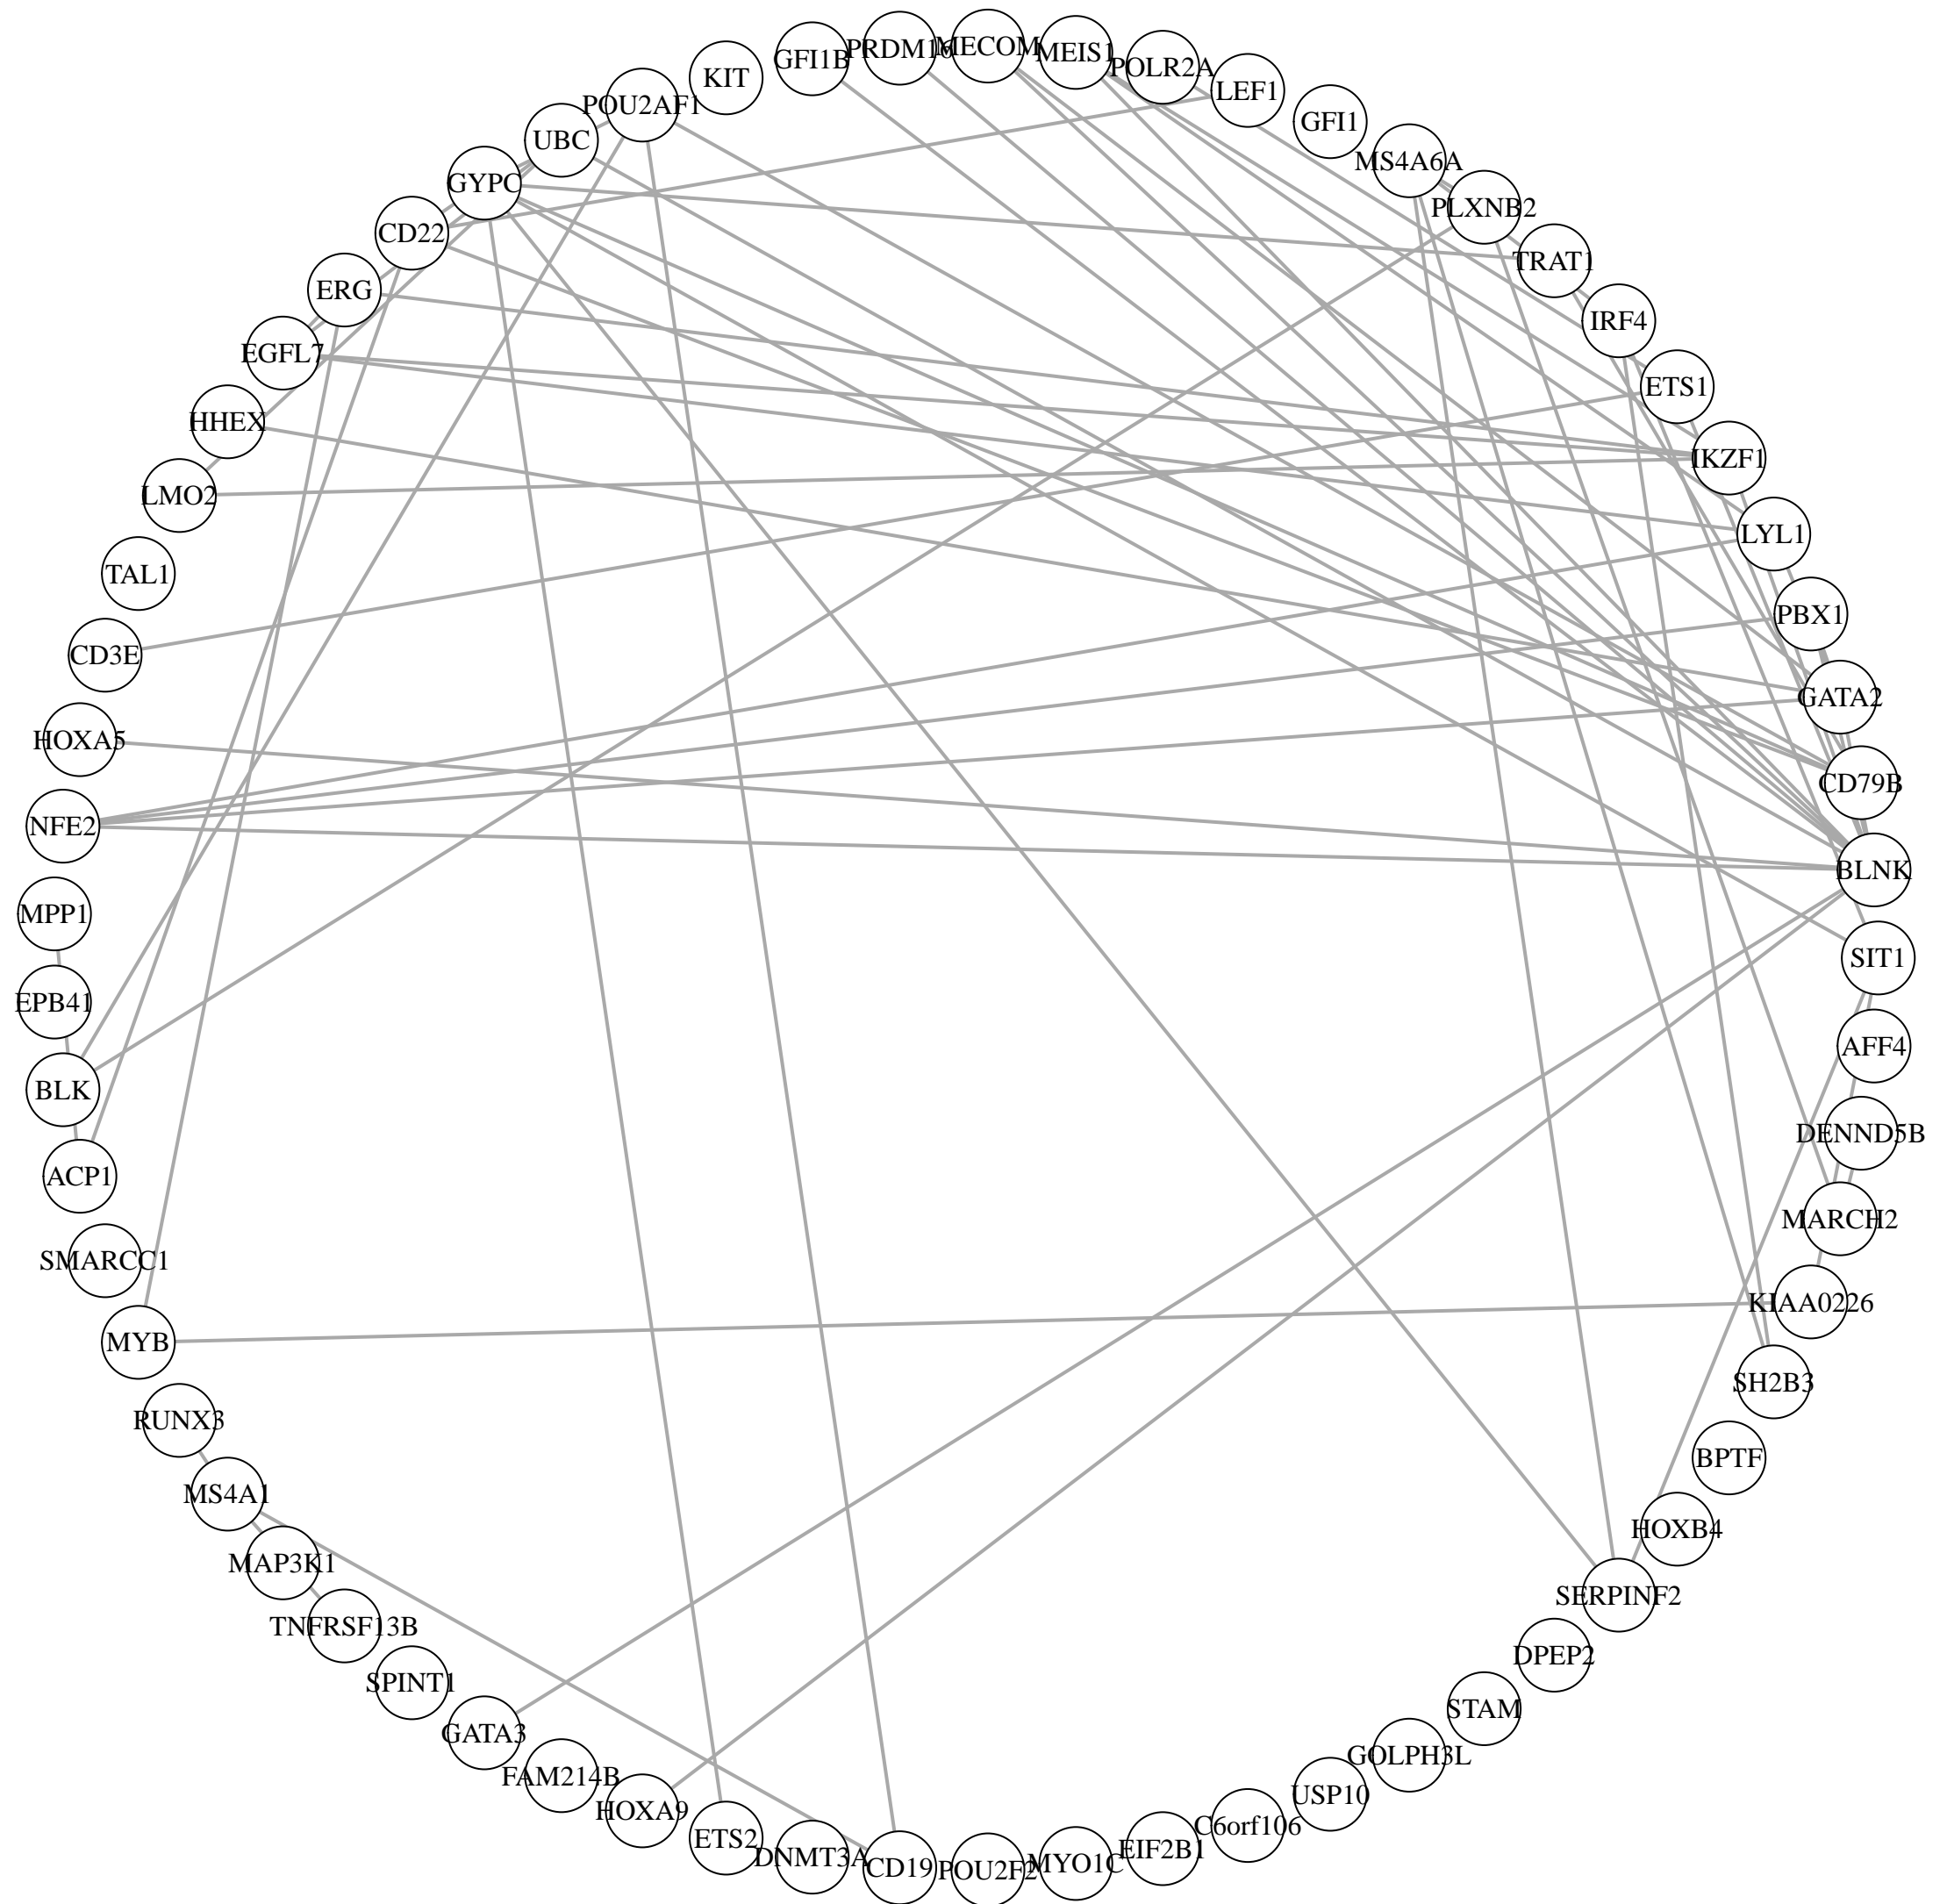

human\_HSCtoLMPP\_time 23

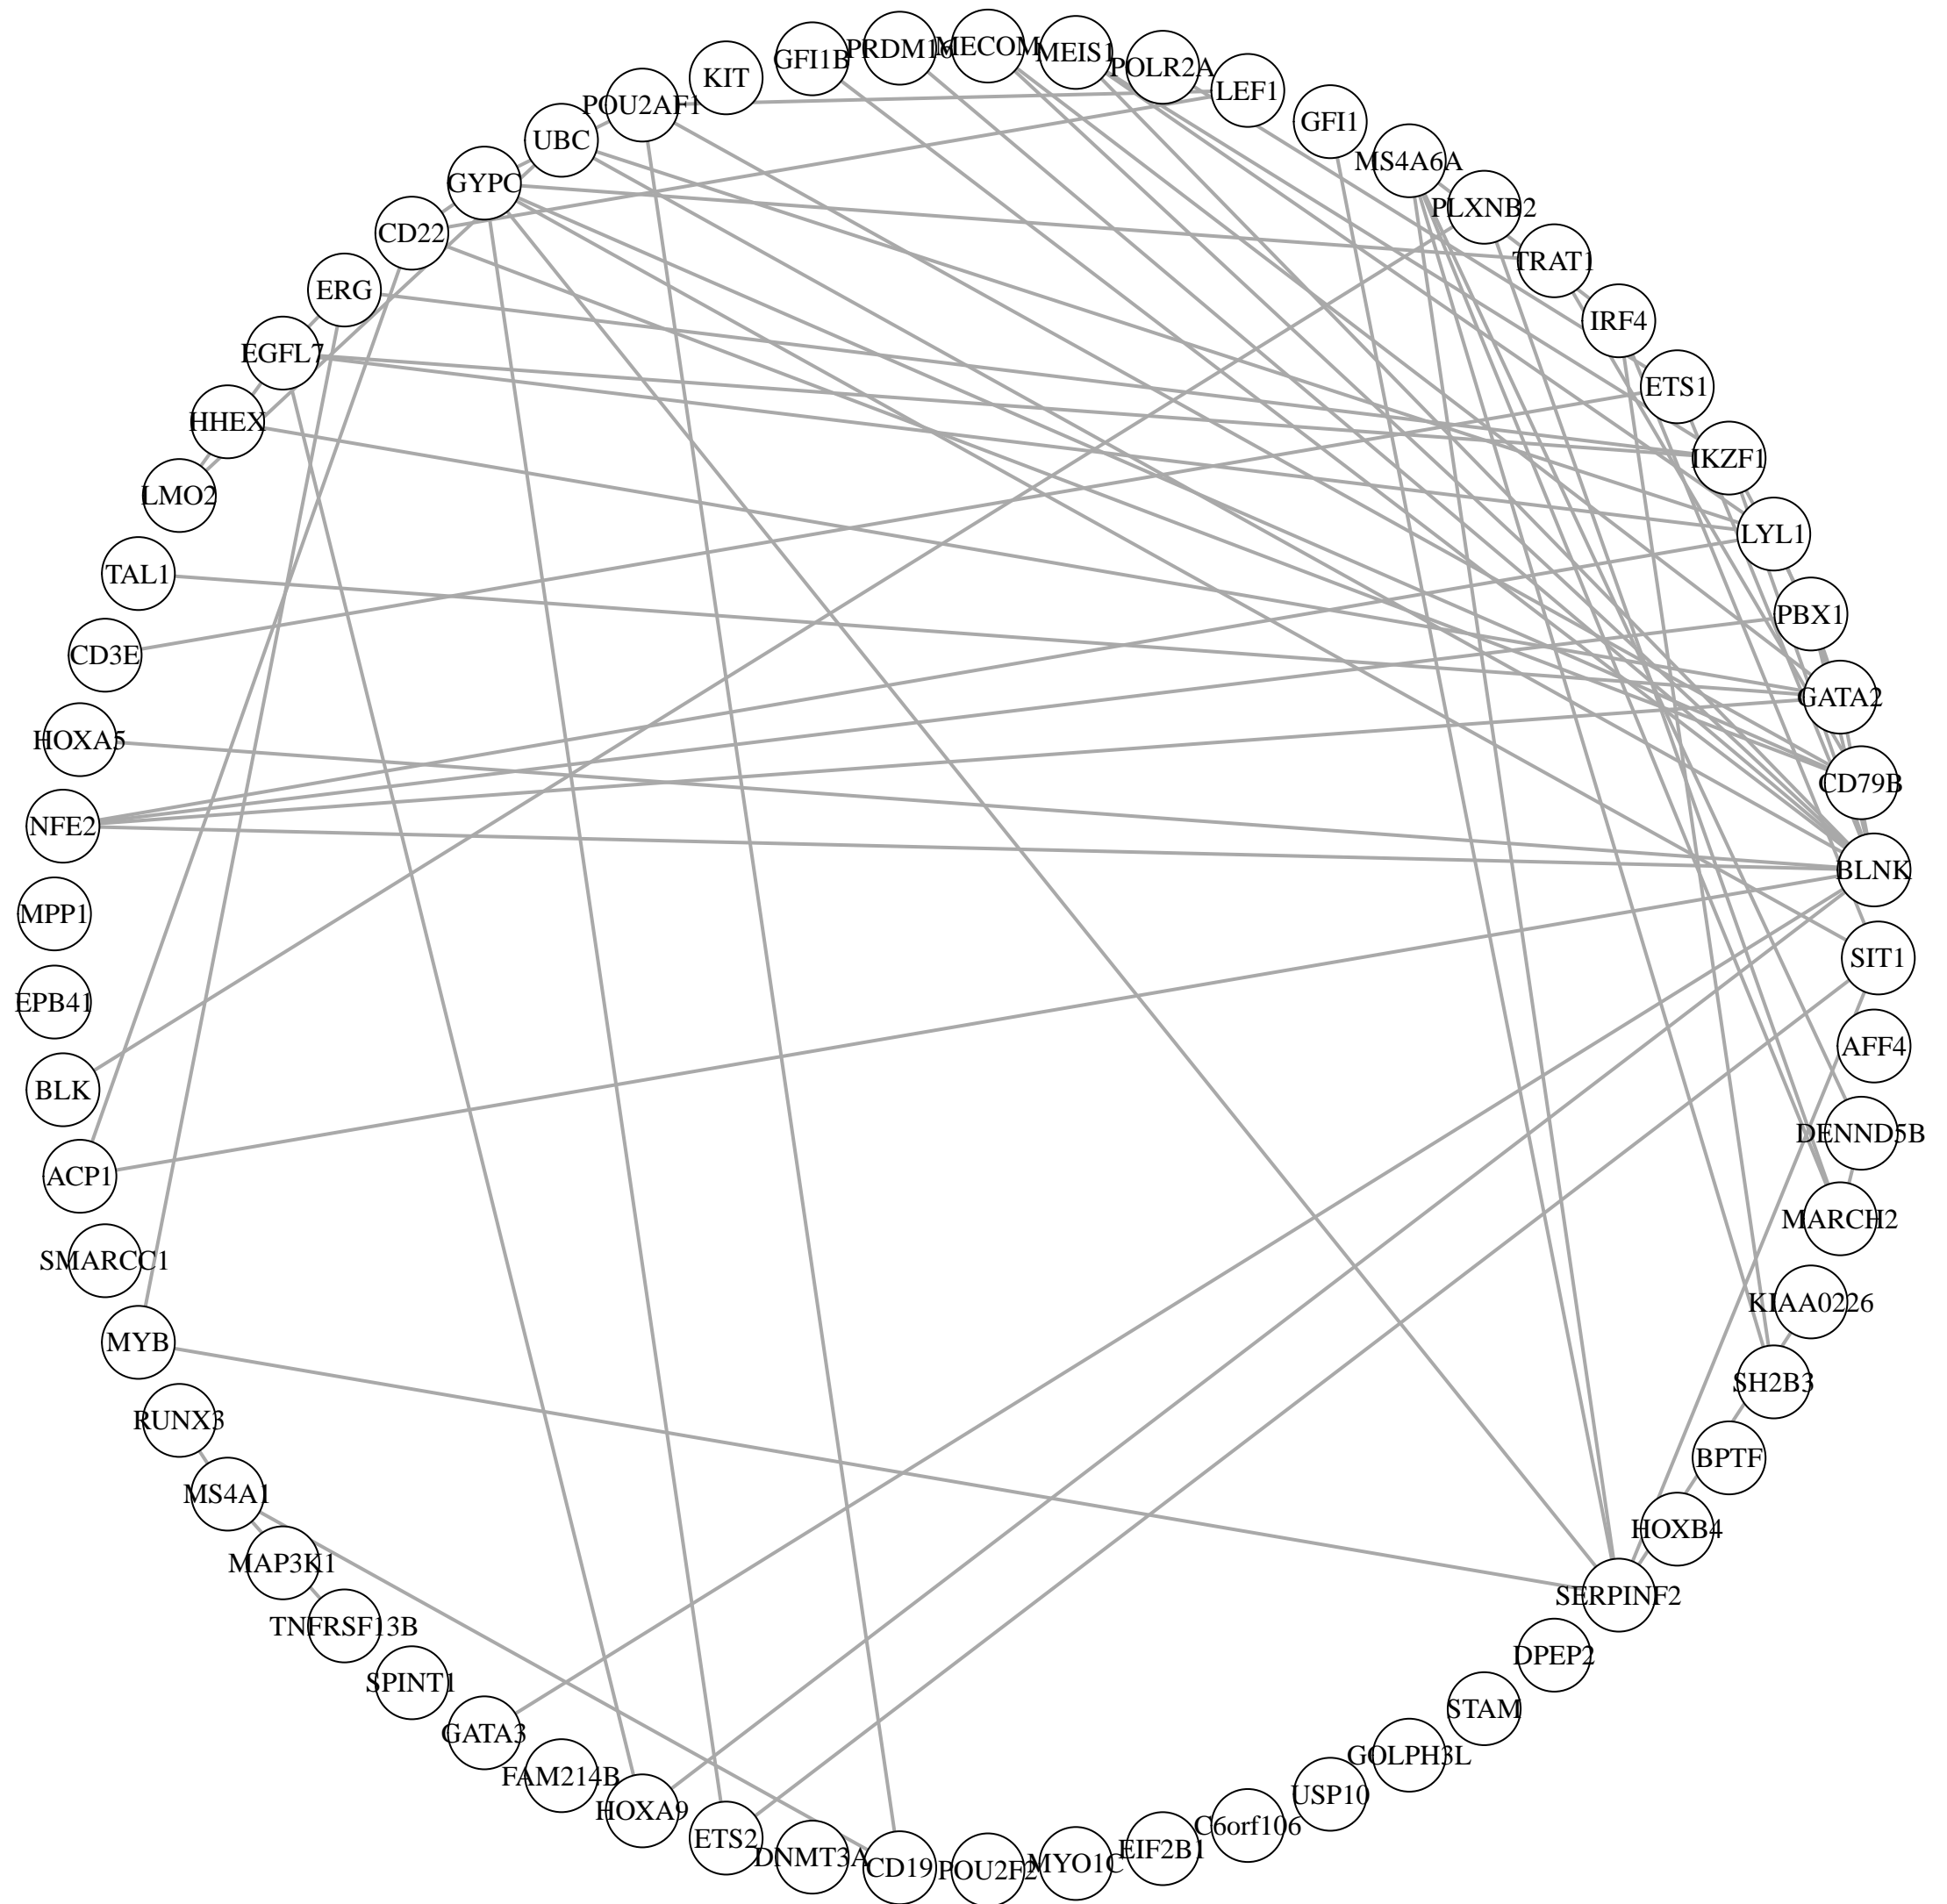

human\_HSCtoLMPP\_time 24

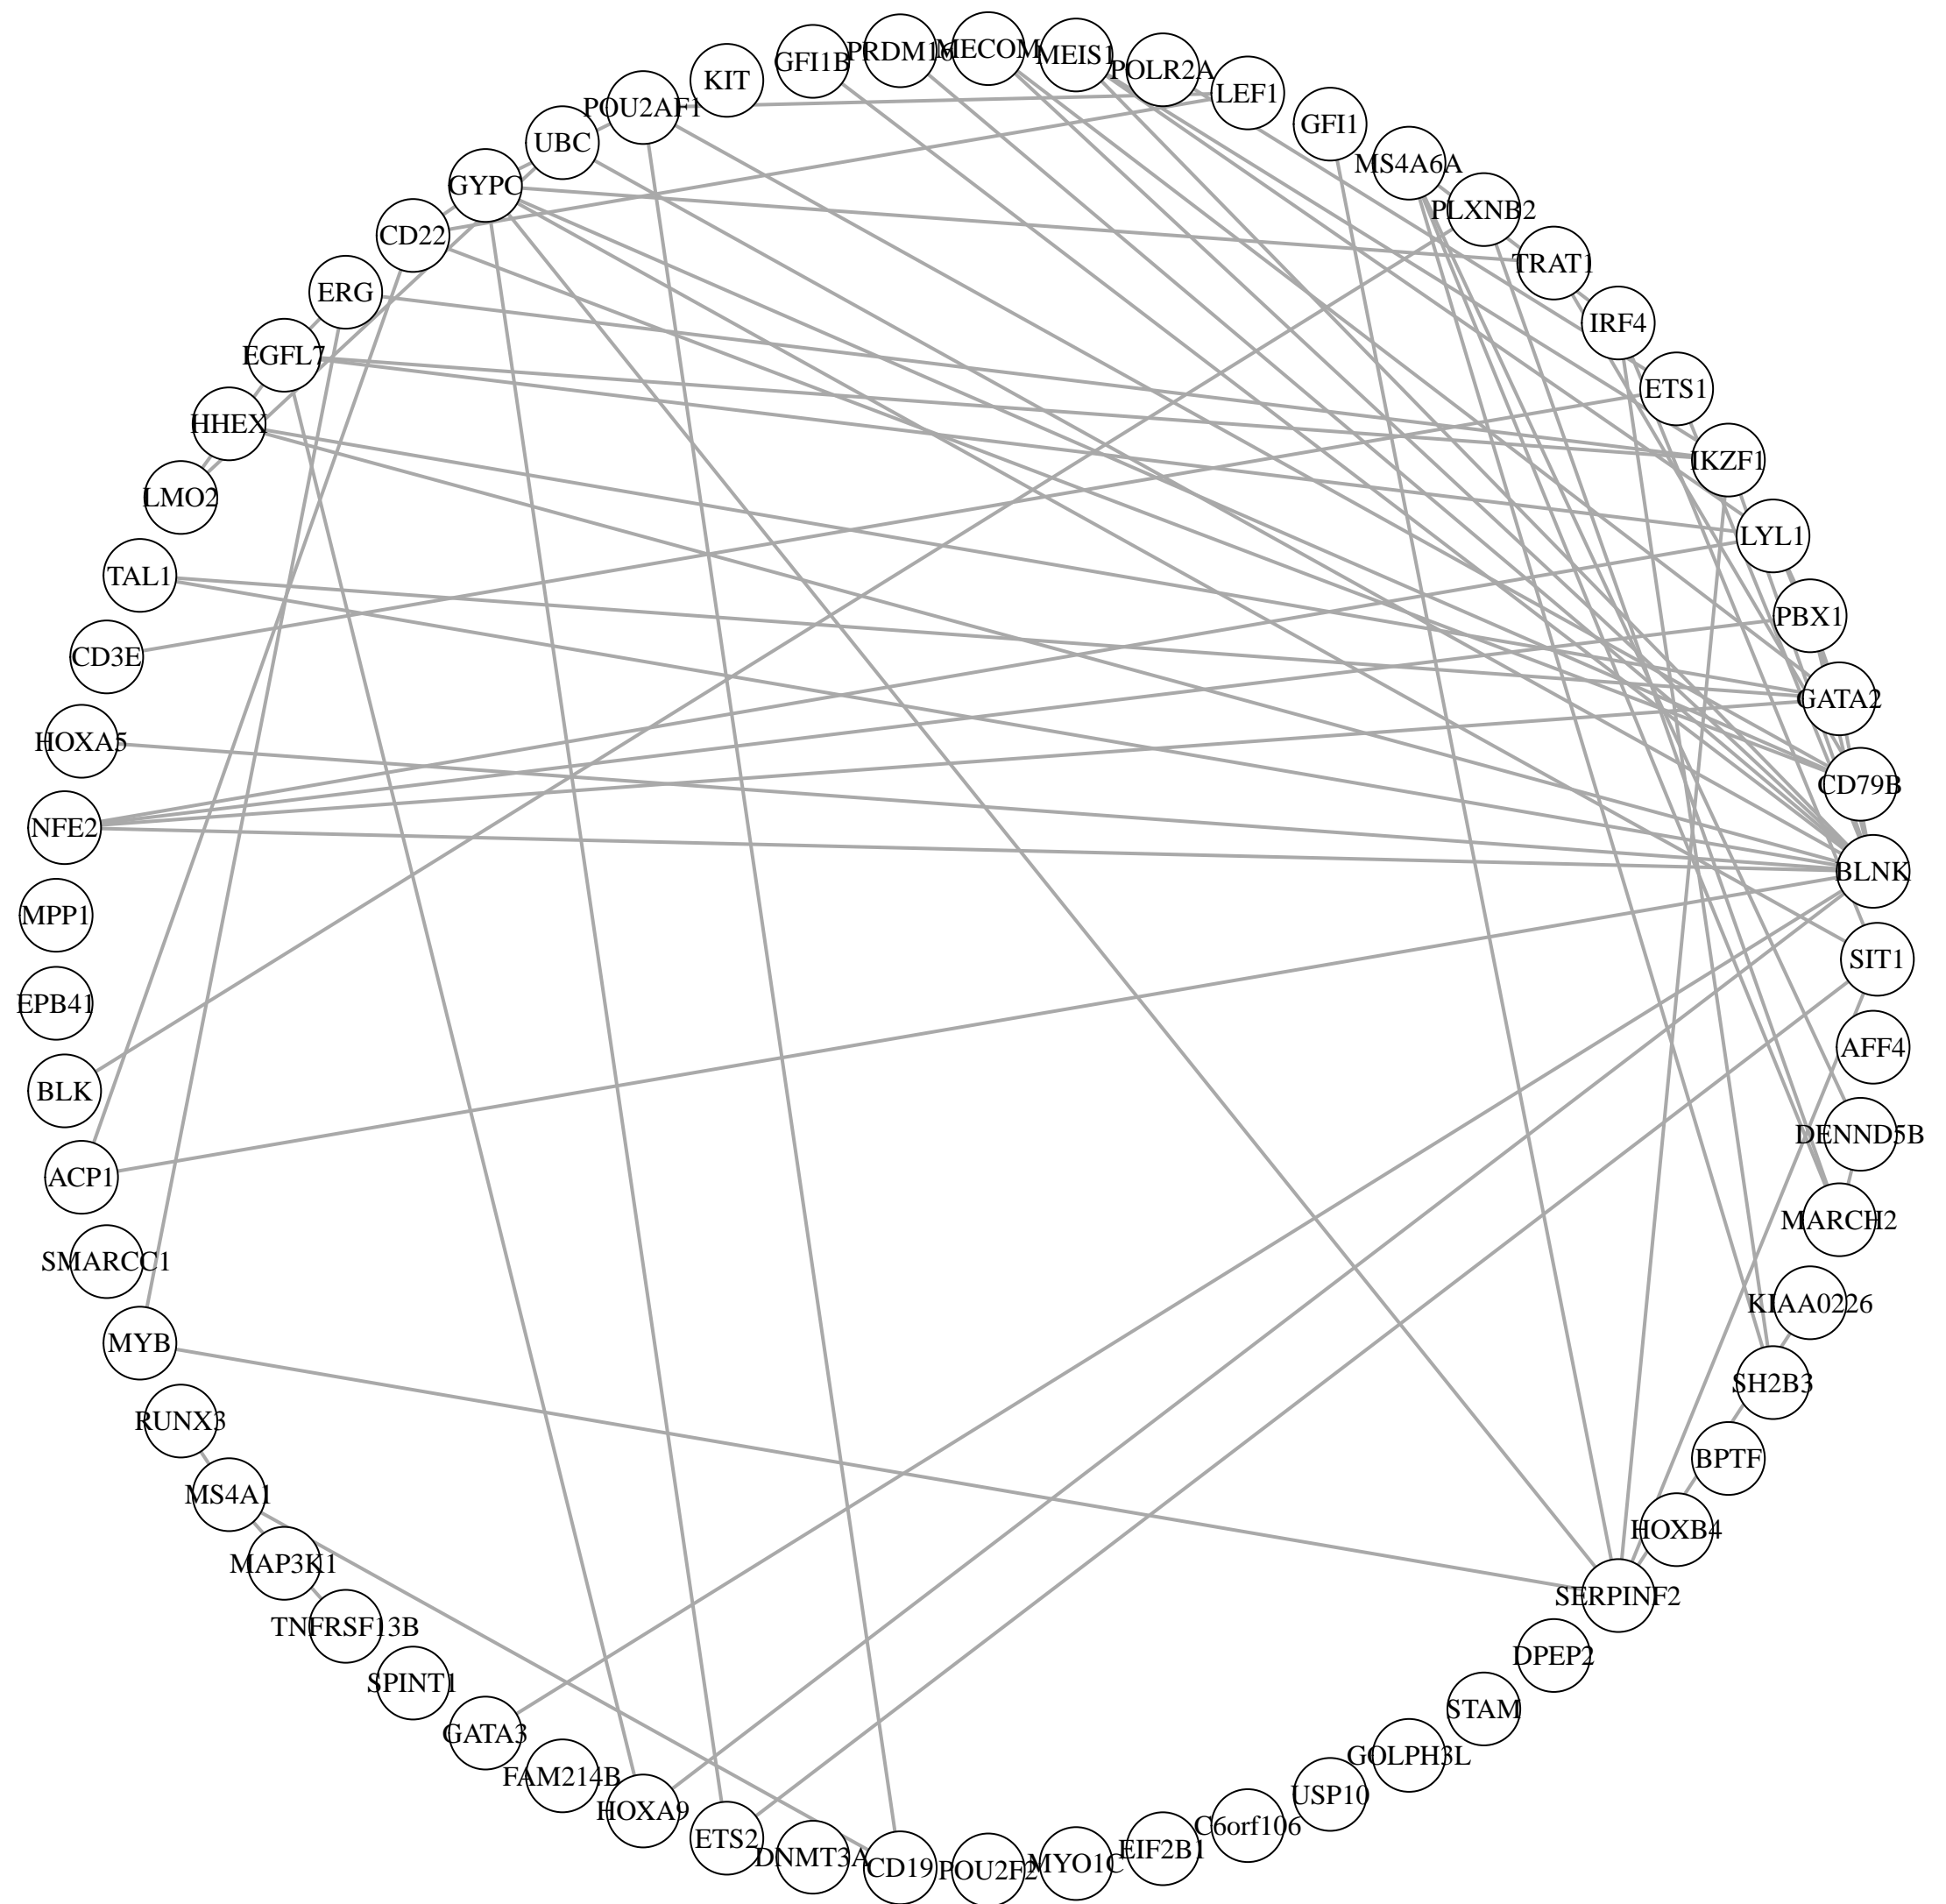

human\_HSCtoLMPP\_time 25

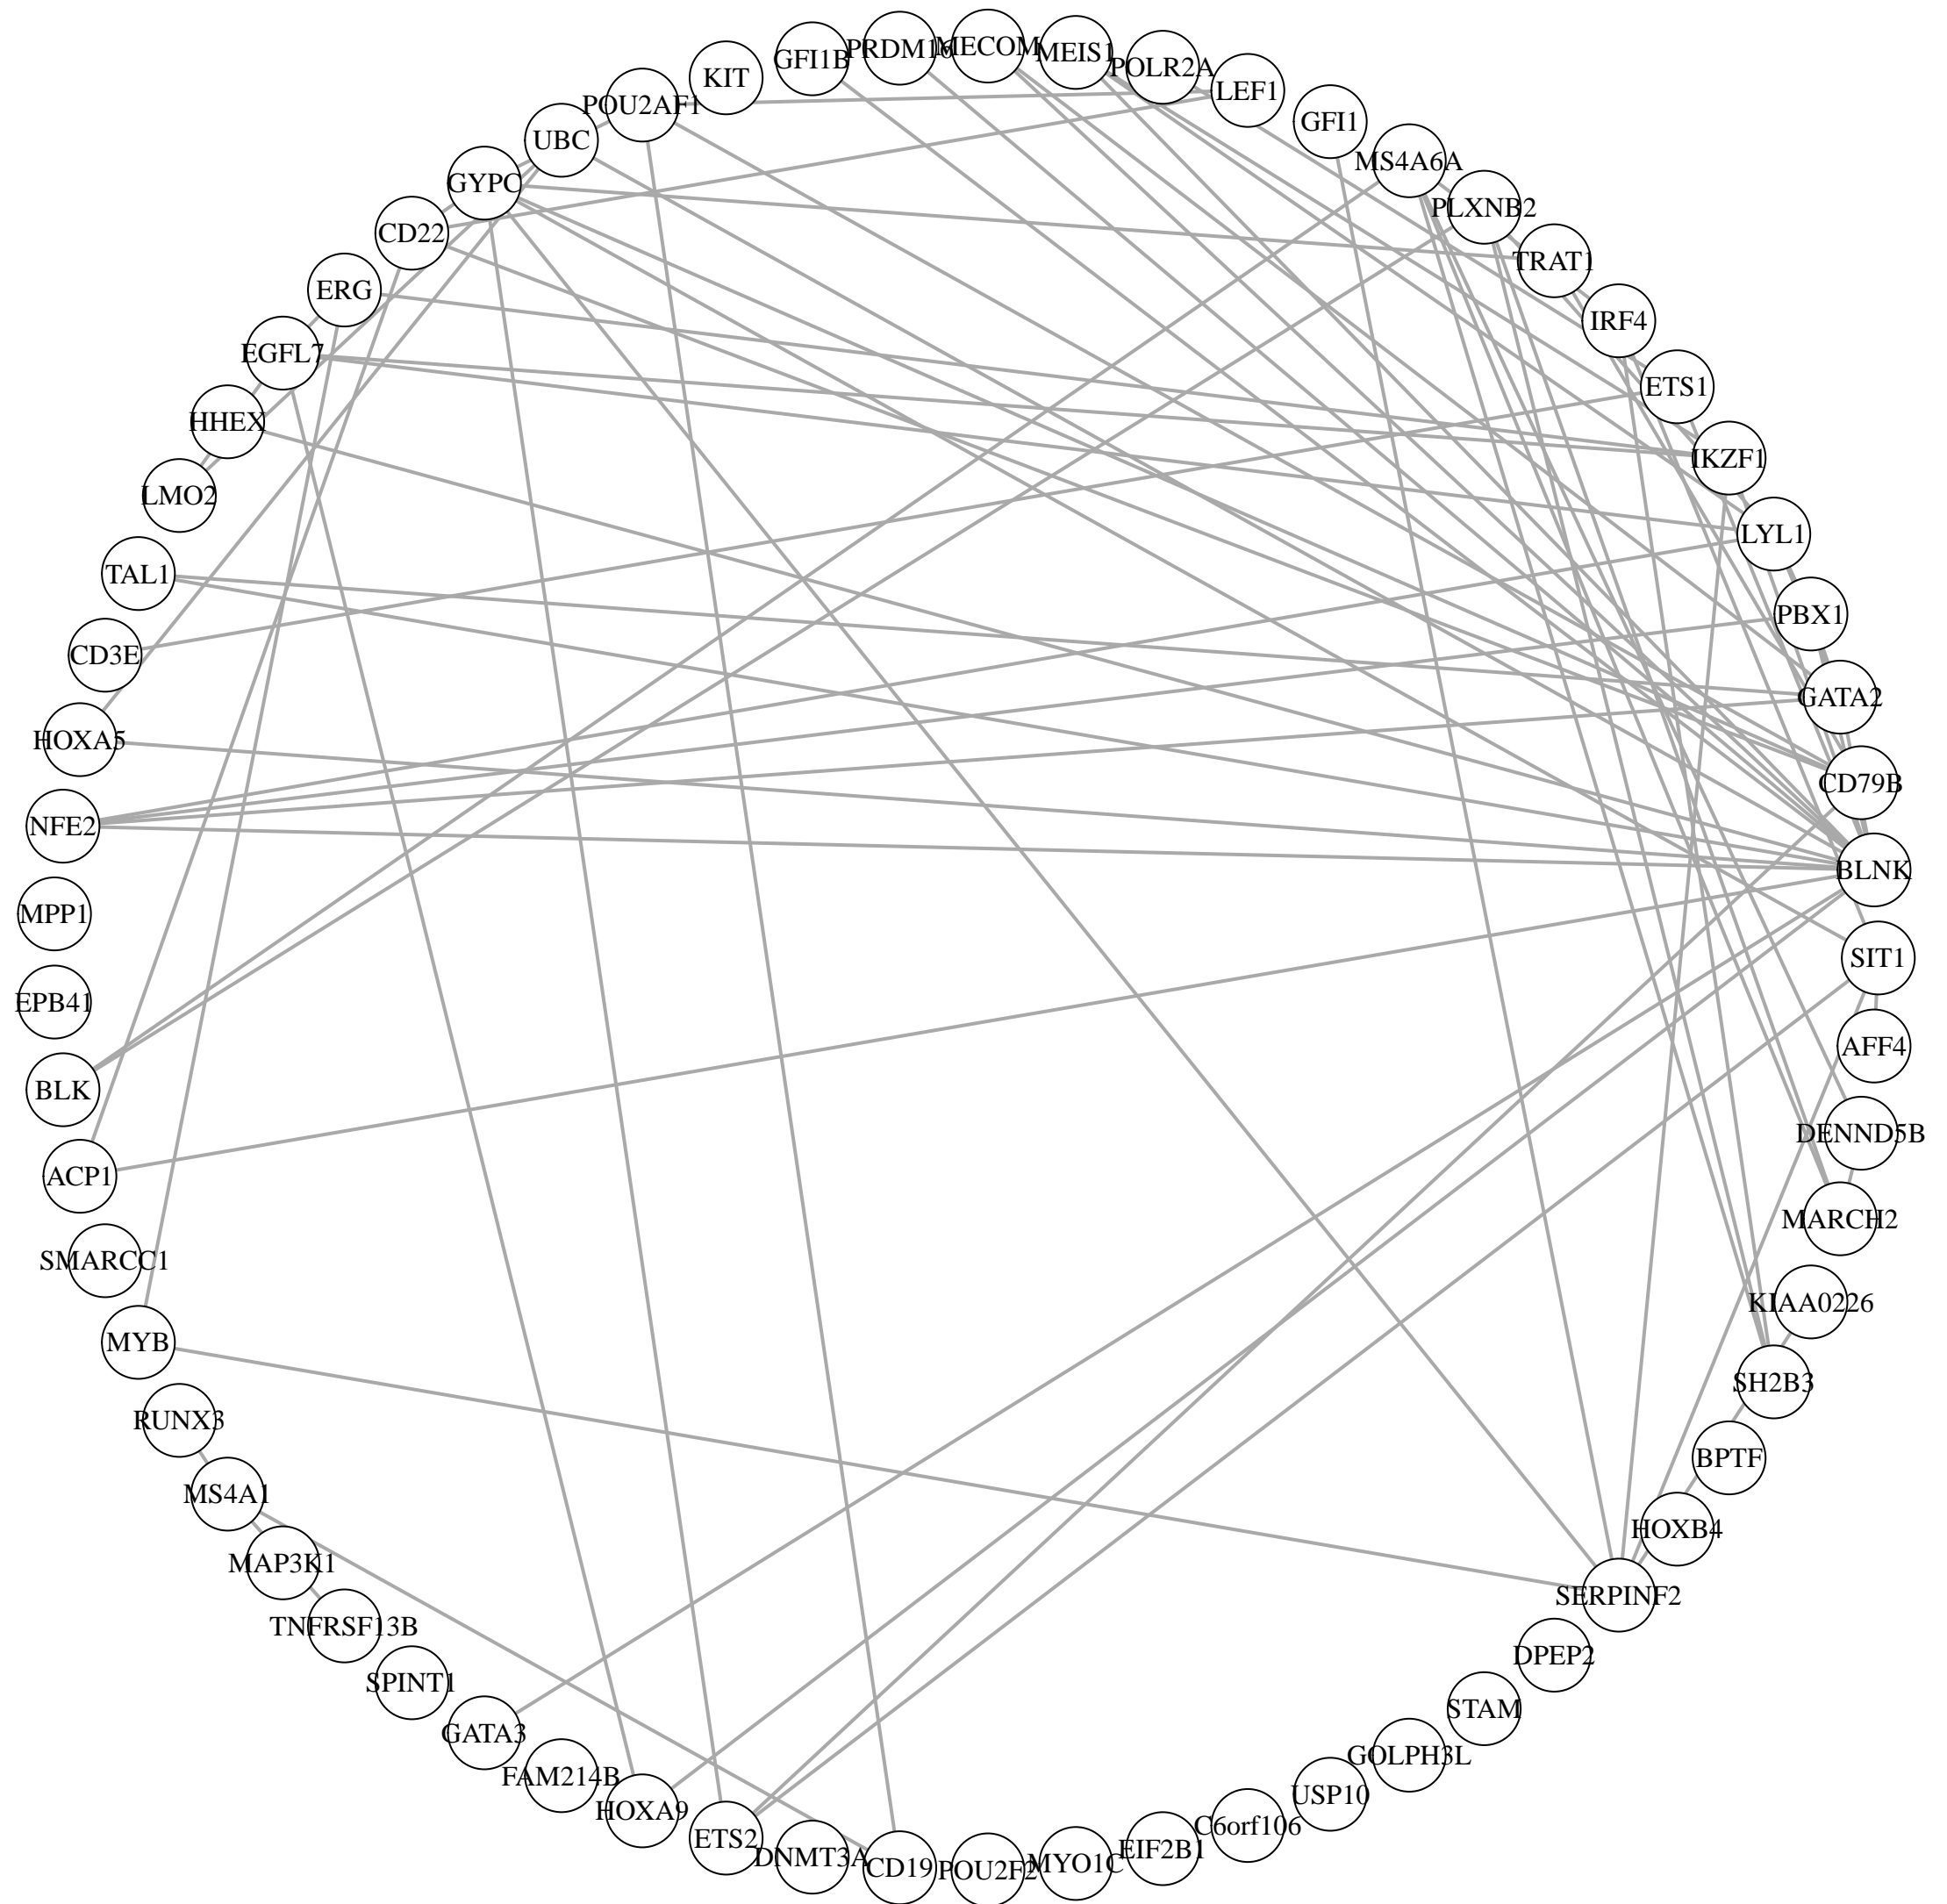

Supplement: s1 [file s1]
