# Supplementary material for: Time-Varying Gene Expression Network Analysis Reveals Conserved Transition States in Hematopoietic Differentiation between Human and Mouse
Source: MDPI journal article supplement (doi:10.3390/genes13101890), 2022-10-18

## Degree distribution of networks from HSC to GMP in human

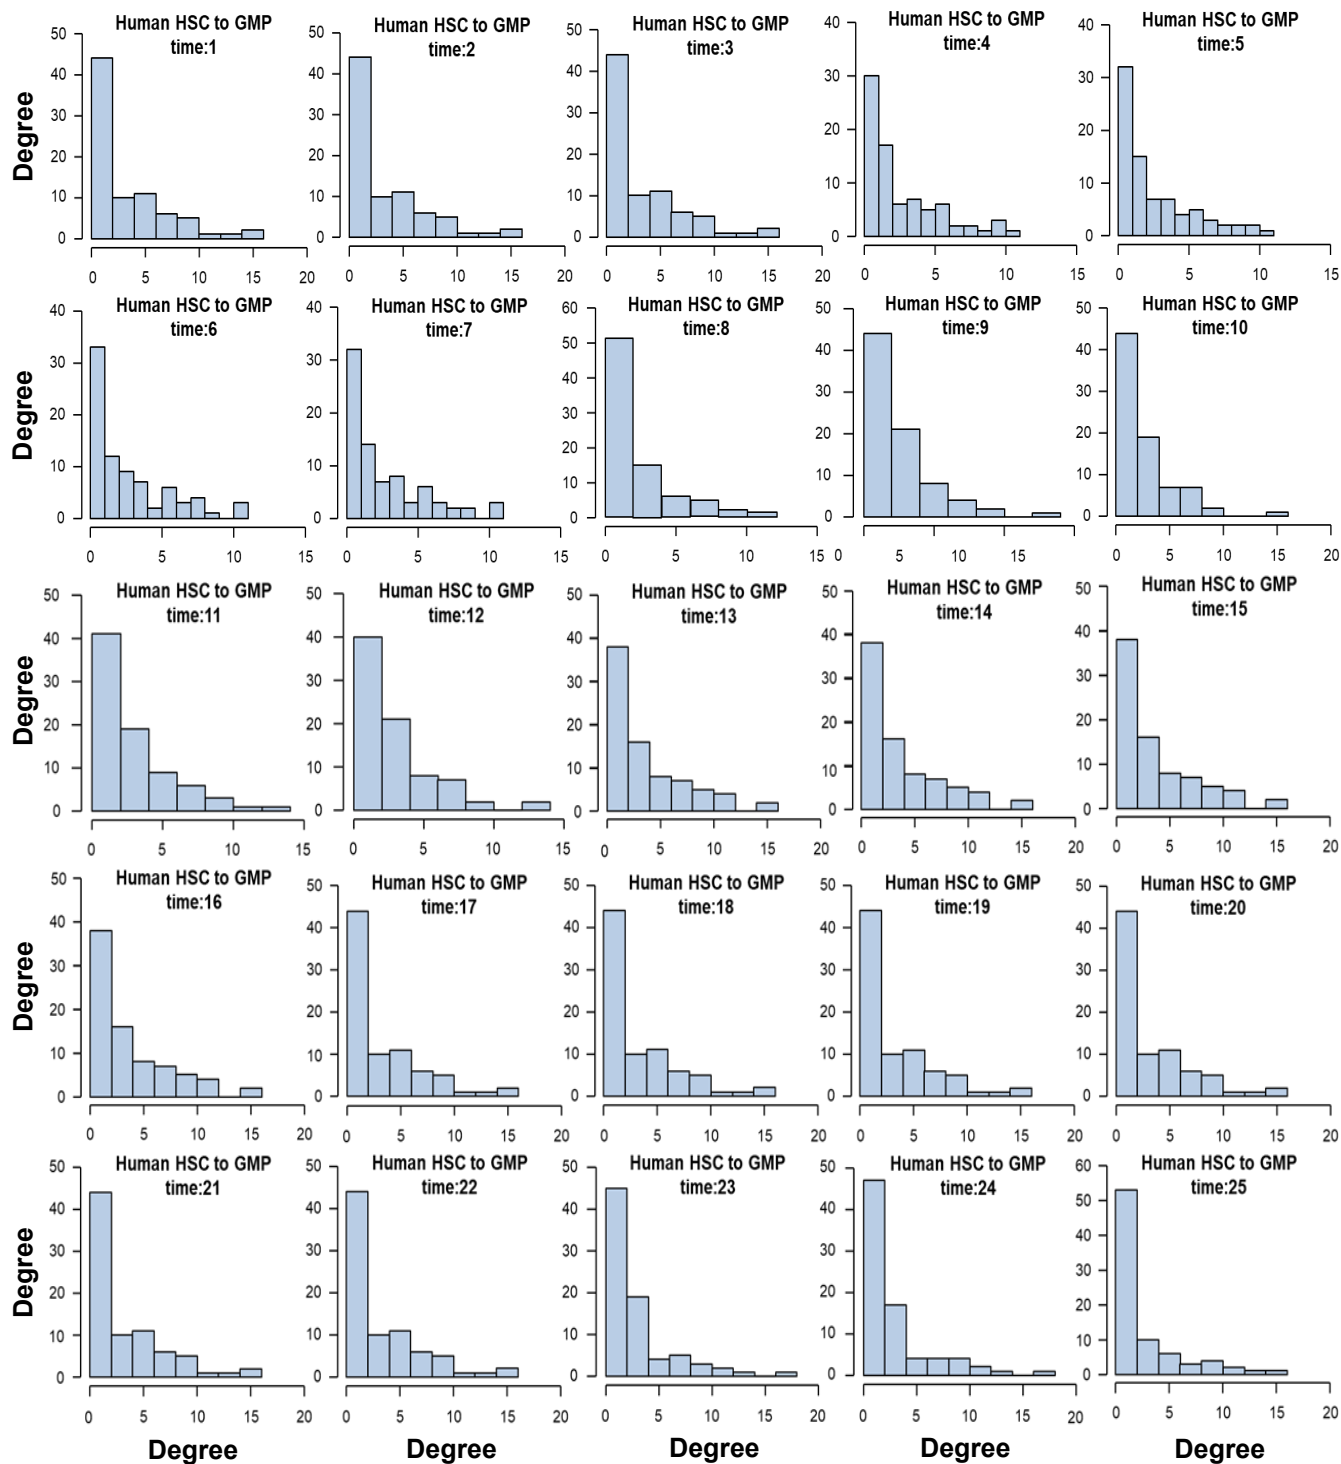

## Degree distribution of networks from HSC to MEP in human

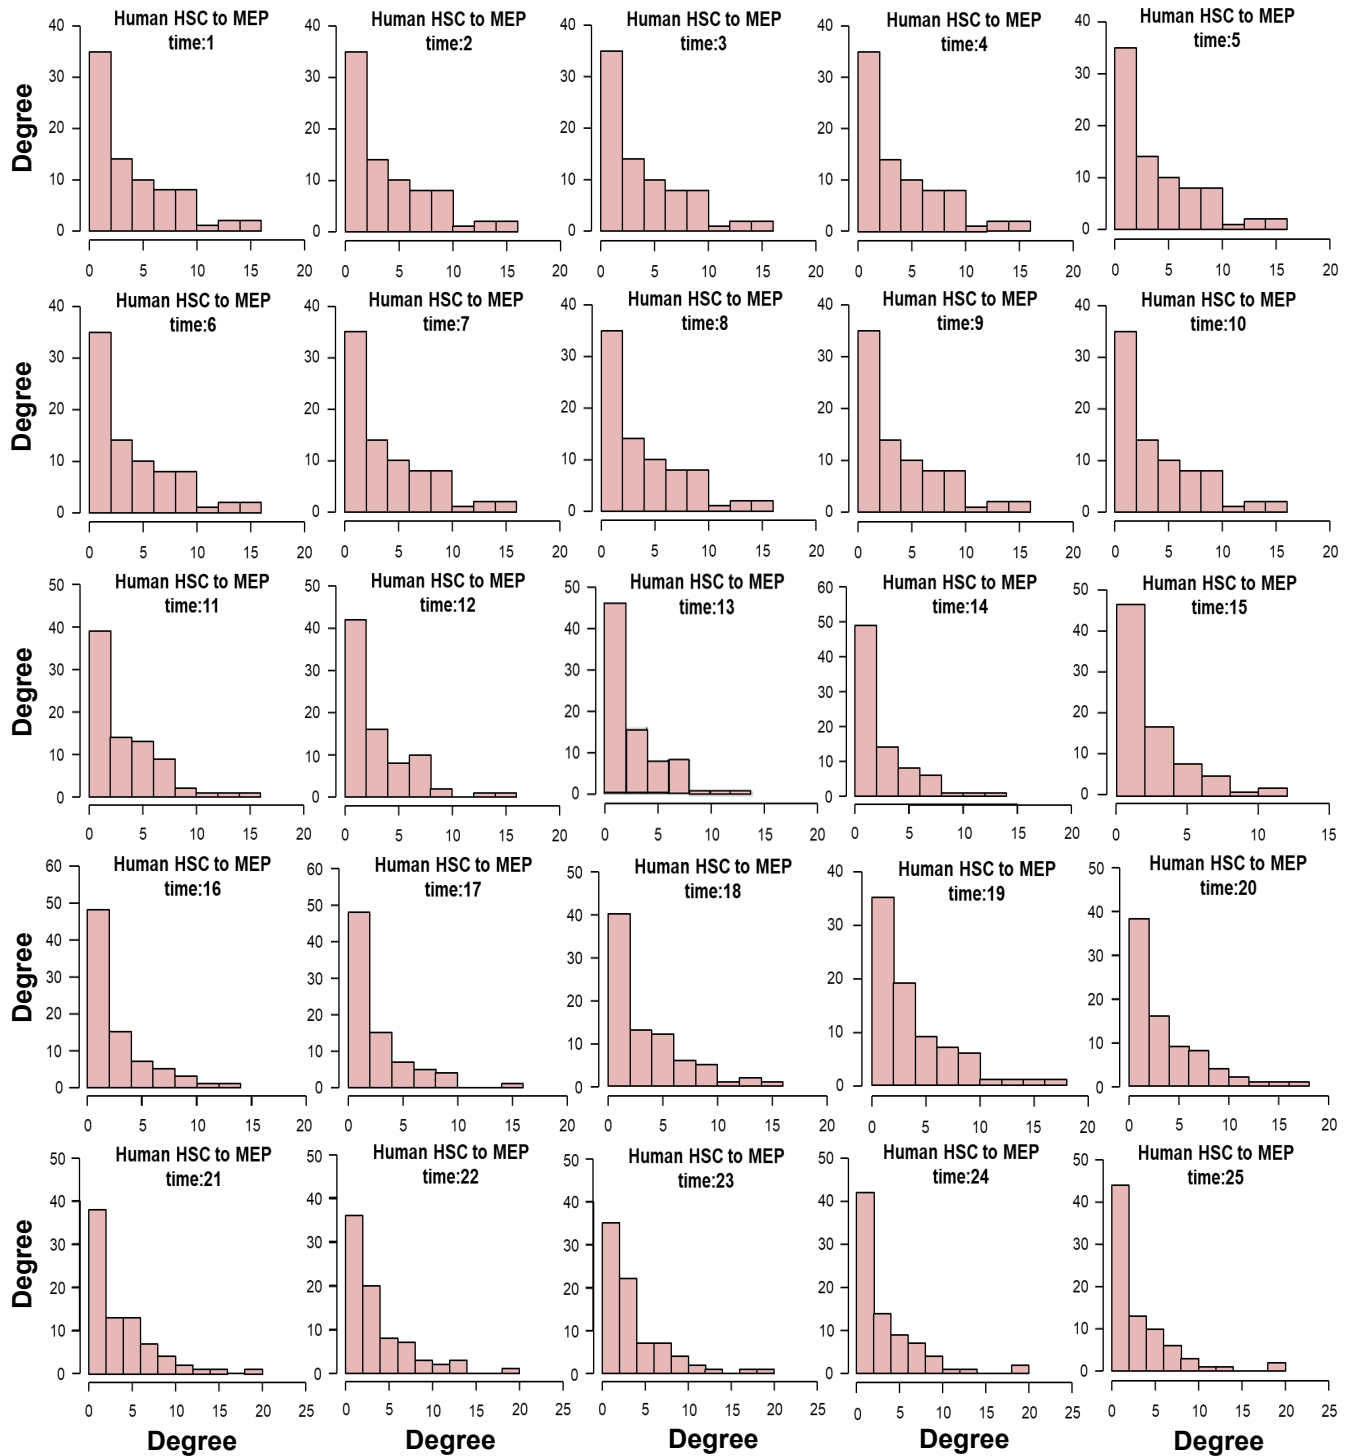

## Degree distribution of networks from HSC to LMPP in human

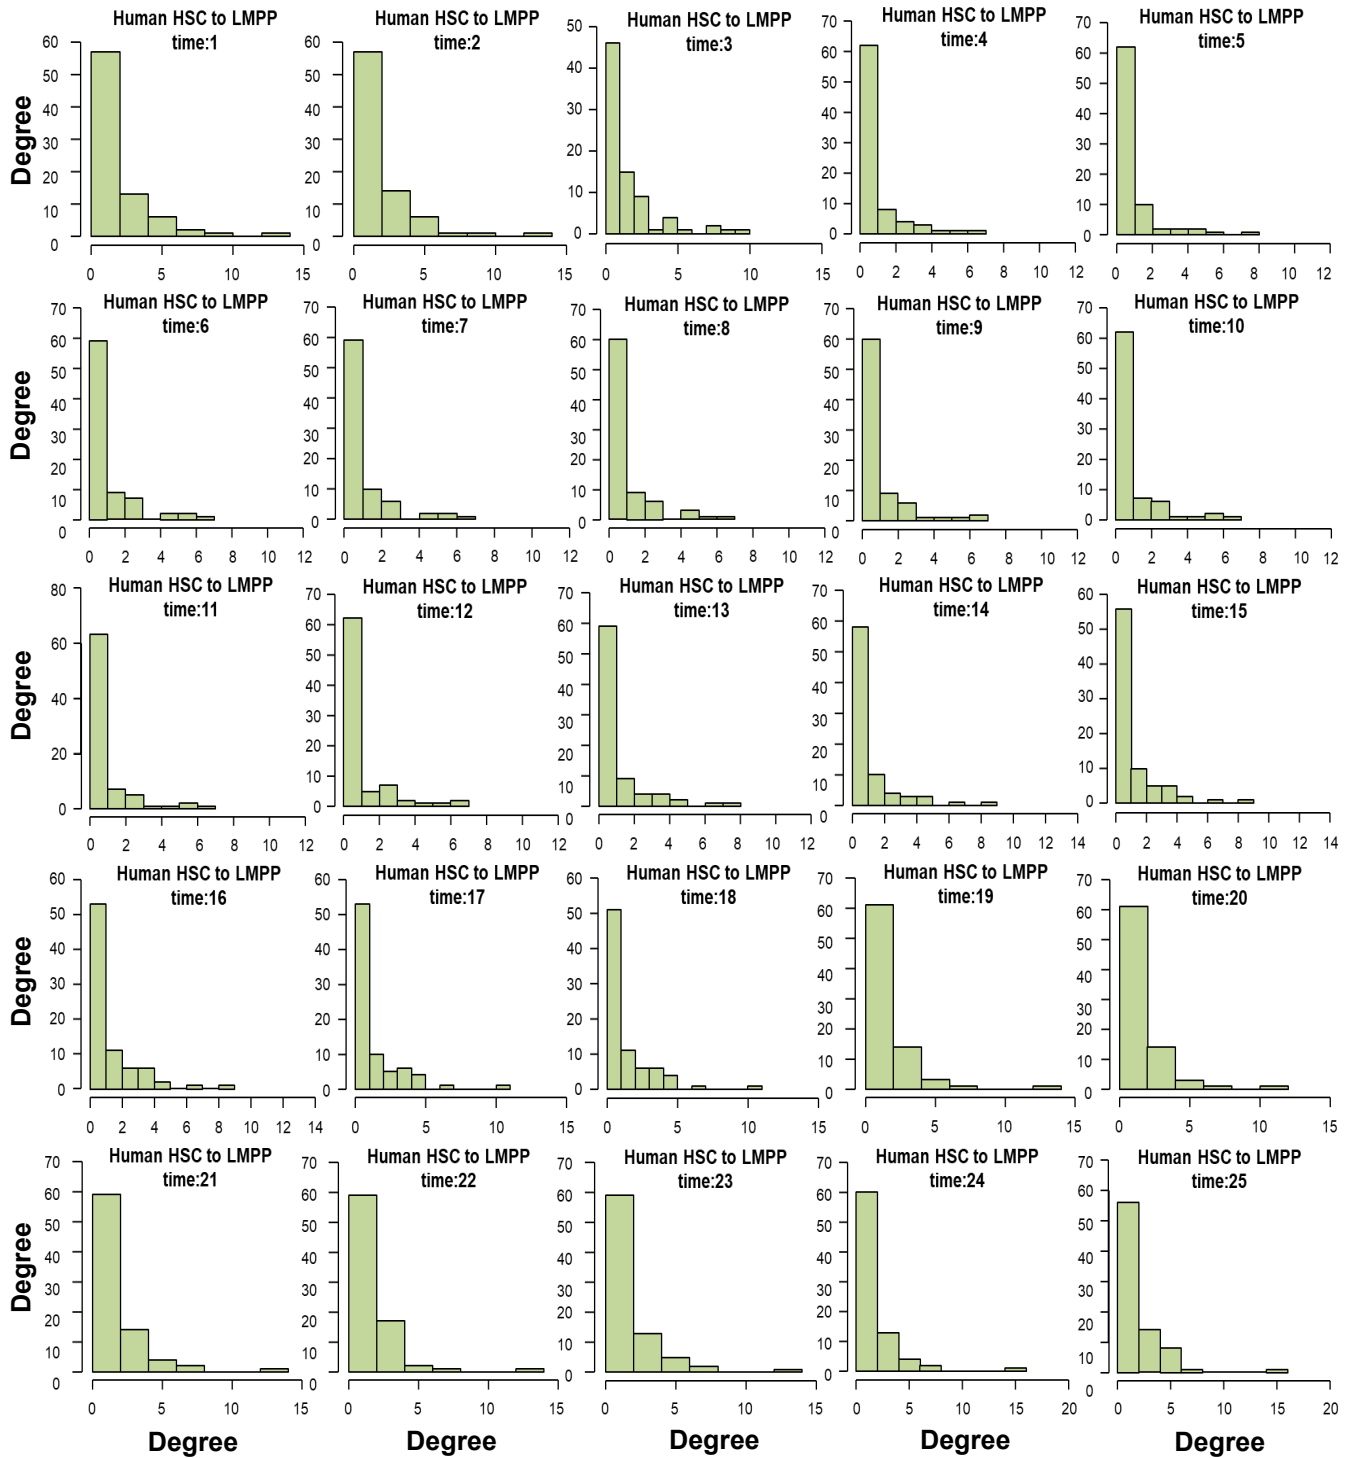

## Degree distribution of networks from HSC to GMP in mouse

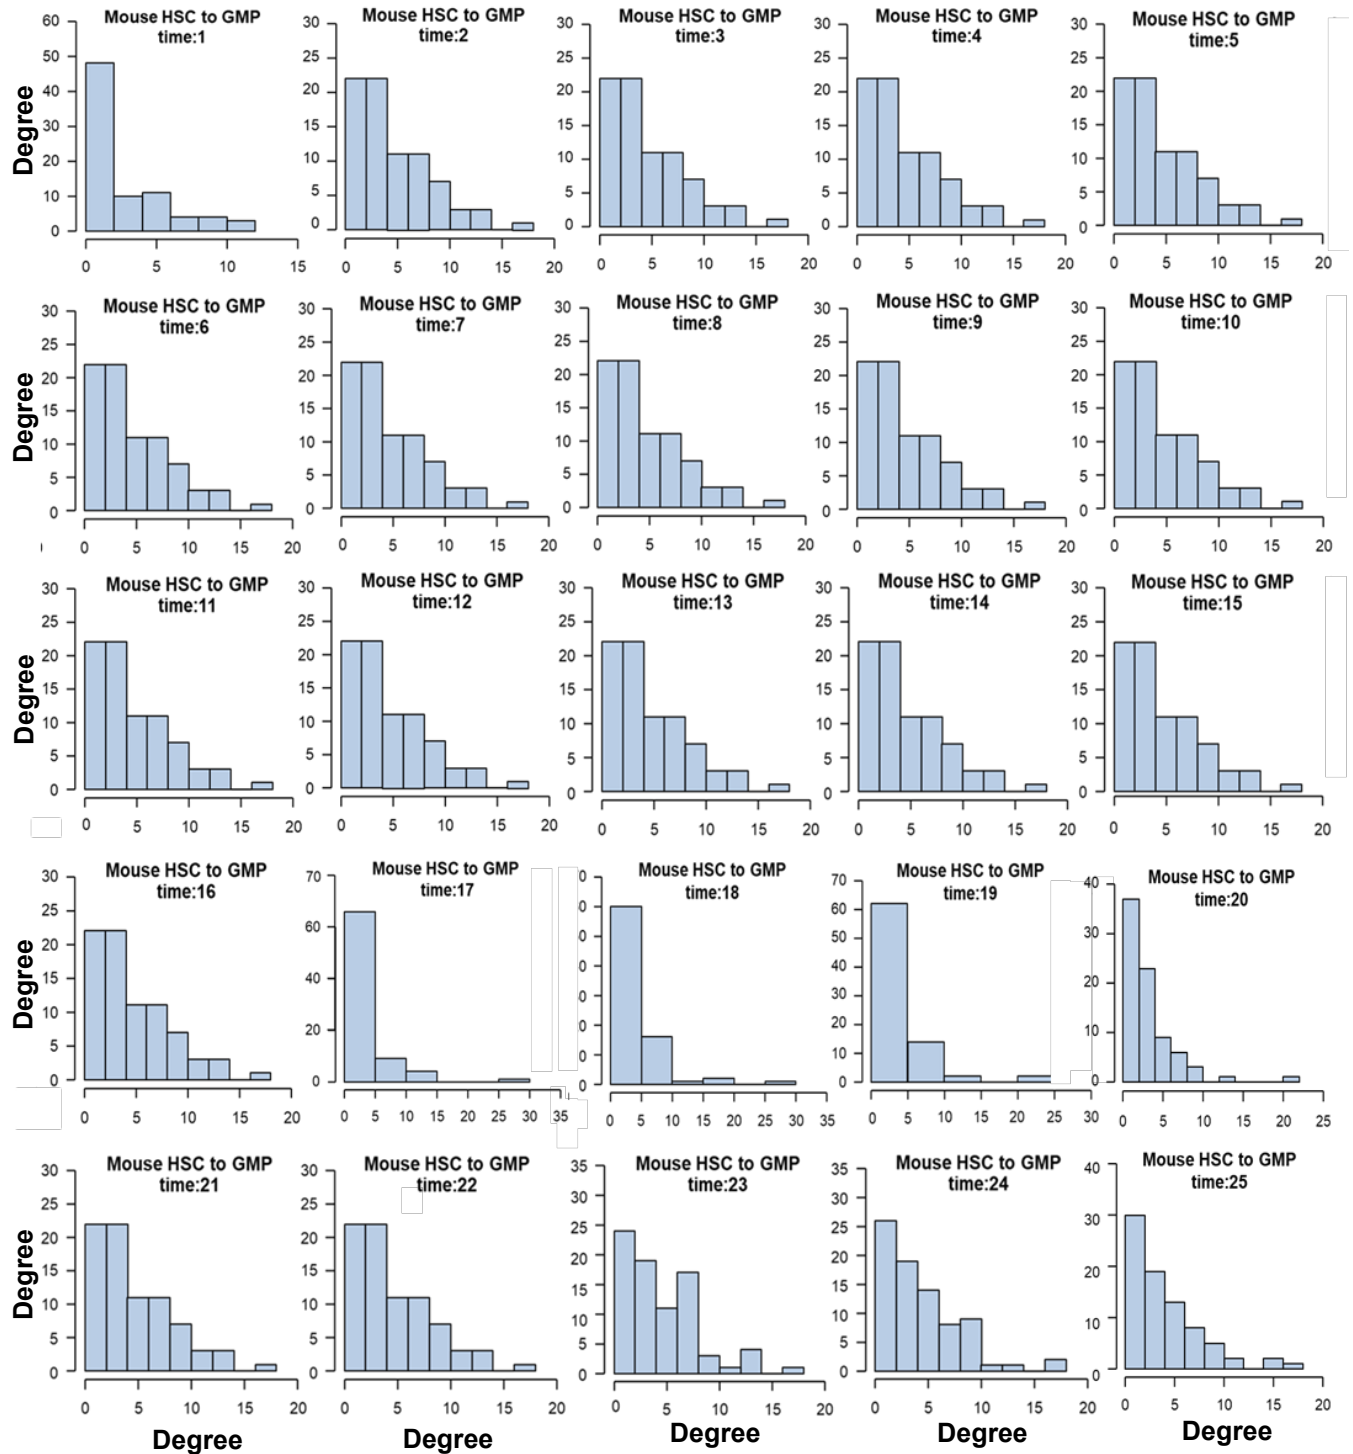

## Degree distribution of networks from HSC to MEP in mouse

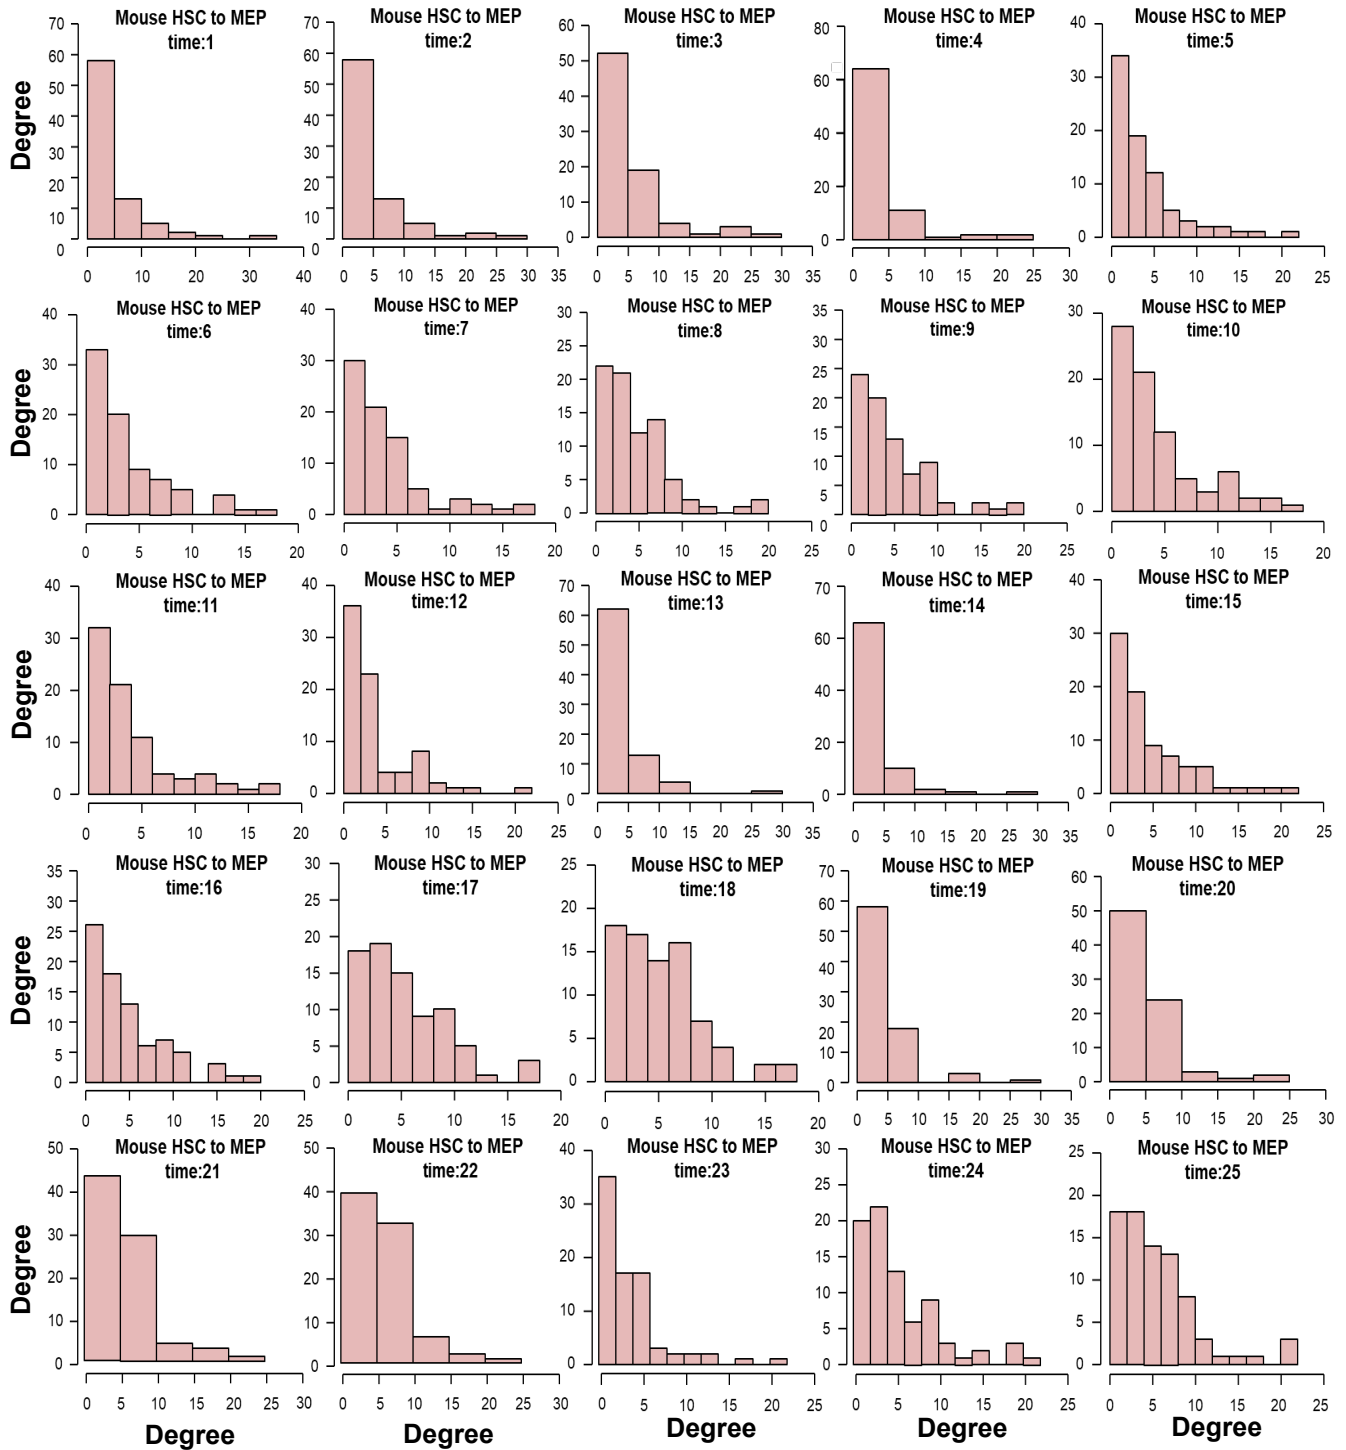

## Degree distribution of networks from HSC to LMPP in mouse

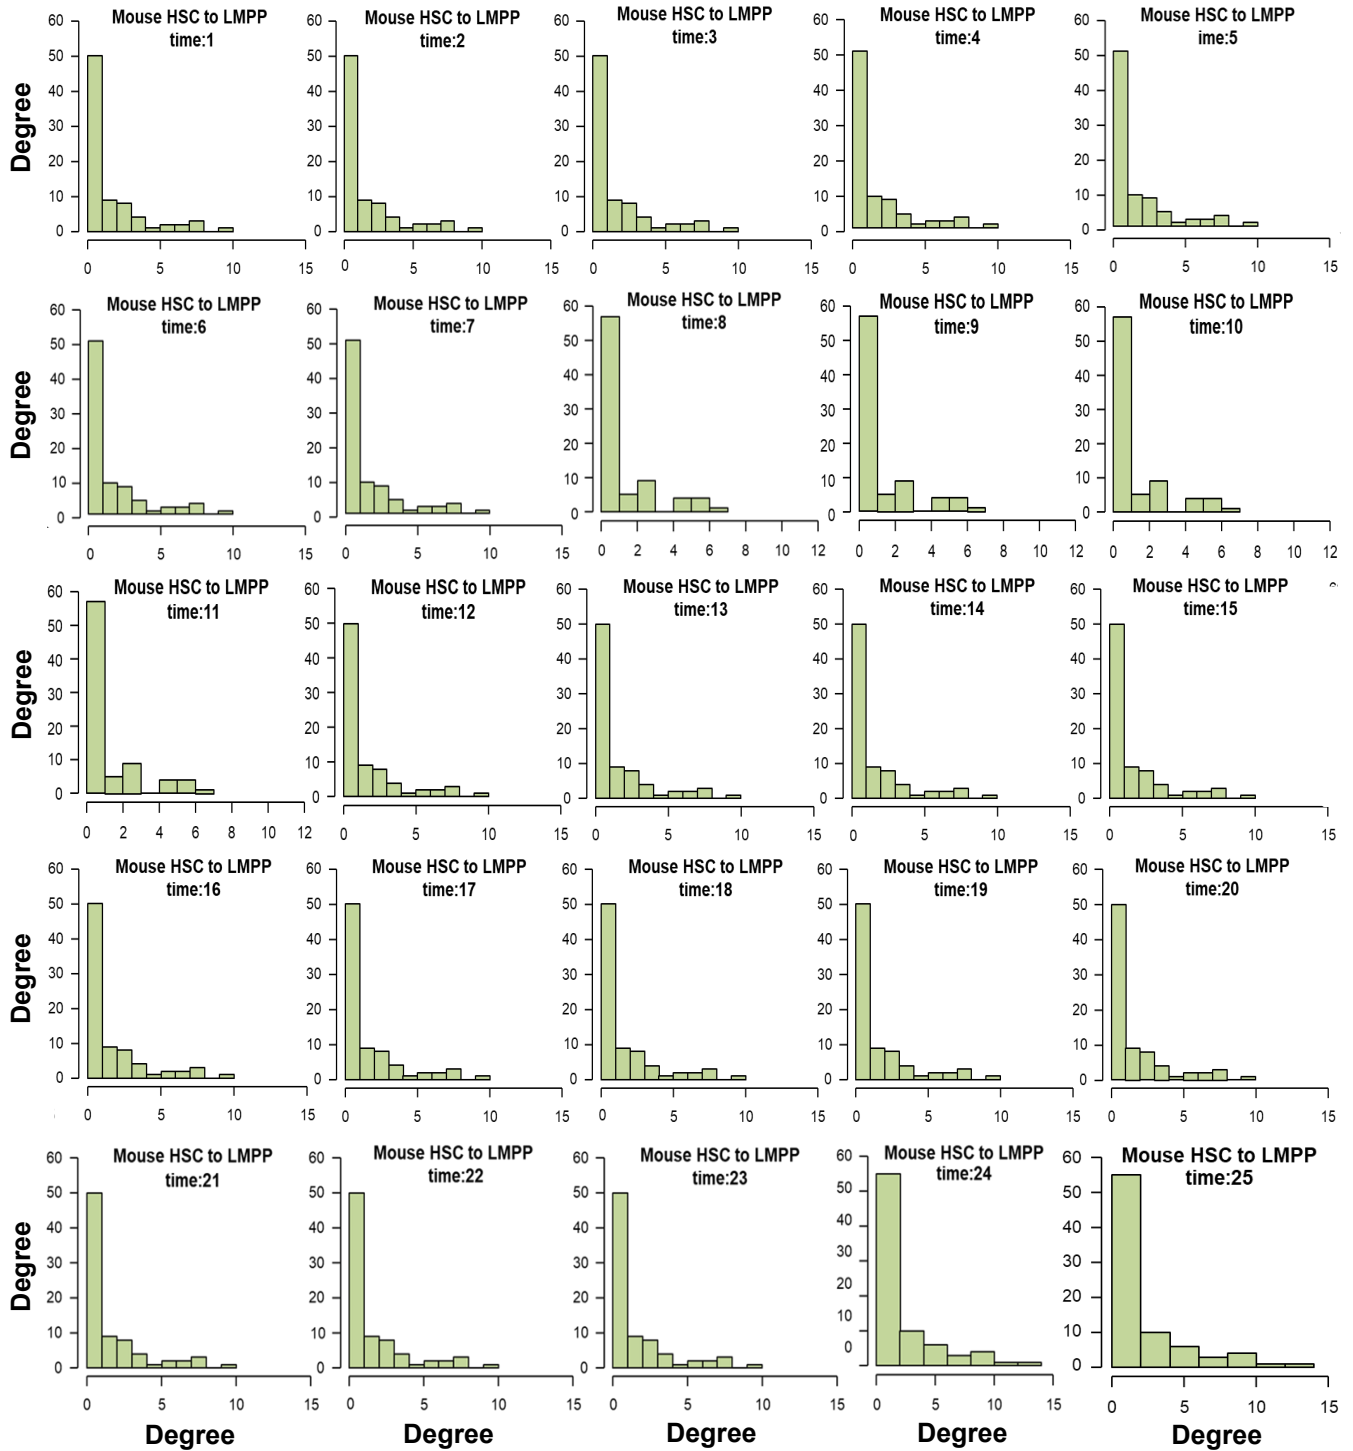

Supplement: s1 [file s1]
