# Supplementary material for: Time-Varying Gene Expression Network Analysis Reveals Conserved Transition States in Hematopoietic Differentiation between Human and Mouse
Source: Genes (Basel). 2022 Oct 18;13(10):1890. doi: 10.3390/genes13101890 (PMC9601530; doi:10.3390/genes13101890)
Supplement: Supplementary file 1 [file genes-13-01890-s001.zip]

Archive with 6 entries (6 files):
- Supp Figure S1.pdf
- Supp Figure S2.pdf
- supp Table S1.xlsx
- suppFile S1.txt
- suppFile S2.txt
- SuppFile S3.txt
