# Supplementary material for: Time-Varying Gene Expression Network Analysis Reveals Conserved Transition States in Hematopoietic Differentiation between Human and Mouse
Source: Genes (Basel). 2022 Oct 18;13(10):1890. doi: 10.3390/genes13101890 (PMC9601530; doi:10.3390/genes13101890)
Supplement: Supplementary file 1 [file genes-13-01890-s001.zip › supp Table S1.xlsx]

## Sheet: compare_merge_time_degree
	Comparison of merged-time network degree between human and mouse
	Trajectory	Gene		Merge_time_degree
		Human	Mouse	Human	Mouse
	HSCtoGMP	EGFL7	Egfl7	13.6	8.68
	HSCtoMEP	GYPC	Slc43a1	13.44	2.68
	HSCtoGMP	MYB	Myb	12.92	8.52
	HSCtoMEP	GFI1B	Gfi1b	11.24	6.8
	HSCtoMEP	ITGA2B	Itga2b	11.24	7.81818
	HSCtoGMP	LYL1	Lyl1	11	6.04348
	HSCtoGMP	GYPC	Slc43a1	10.2	1.95455
	HSCtoMEP	FBXO7	Spta1	10.12	2.78947
	HSCtoGMP	GATA2	Gata2	9.92	7.64
	HSCtoGMP	SH2B3	Sh2b3	8.84	1.41667
	HSCtoMEP	GATA1	Gata1	8.8	10.6
	HSCtoGMP	ERG	Erg	8.56	8.08
	HSCtoMEP	ETV6	Etv6	8.4	6.96
	HSCtoMEP	GATA2	Gata2	8.04	12.68
	HSCtoGMP	CSF1R	Csf1r	7.44	11.52
	HSCtoMEP	ORC1	Blvrb	7.44	11.48
	HSCtoMEP	PBX1	Pbx1	7.4	4.24
	HSCtoMEP	ALAD	Epor	7.28	6.04
	HSCtoGMP	IRF4	Map3k1	7.24	3.125
	HSCtoMEP	GCLM	Sec14l2	7.04	3.55556
	HSCtoMEP	ALAS2	Icam4	7.04	9.96
	HSCtoGMP	PBX1	Pbx1	6.92	9.24
	HSCtoMEP	FLI1	Fli1	6.8	5.16
	HSCtoGMP	RUNX1	Runx1	6.64	5.125
	HSCtoGMP	POU2F2	Tnfrsf13b	6.56	2.86957
	HSCtoGMP	UBC	Ubc	6.4	4.92
	HSCtoMEP	HHEX	Hhex	6.32	3.05556
	HSCtoMEP	ERG	Erg	6.2	5.04
	HSCtoGMP	GFI1B	Gfi1b	6.16	4.24
	HSCtoMEP	LYL1	Lyl1	6	10.16
	HSCtoMEP	POU2F2	Tnfrsf13b	6	7.32
	HSCtoMEP	LDB1	Ldb1	5.64	10.08
	HSCtoMEP	MEIS1	Meis1	5.36	6.72
	HSCtoGMP	BATF3	Spint1	5.24	1.19048
	HSCtoMEP	DIAPH3	Ube2c	5.24	3.33333
	HSCtoMEP	MYB	Myb	5.16	4.2
	HSCtoMEP	LMO2	Lmo2	5	8.4
	HSCtoGMP	MEIS1	Meis1	4.96	14.52
	HSCtoMEP	SMARCC1	Smarcc1	4.72	2.625
	HSCtoGMP	HHEX	Hhex	4.72	5.48
	HSCtoGMP	HOXA9	Hoxa9	4.68	6.88
	HSCtoGMP	KIT	Kit	4.64	10.2
	HSCtoGMP	NFE2	Nfe2	4.6	8.28
	HSCtoGMP	PLXNB2	Ms4a6d	4.58333	2.58333
	HSCtoGMP	IKZF1	Ikzf1	4.56	2.12
	HSCtoMEP	SPTB	Hbq1b	4.48	3
	HSCtoMEP	MPP1	Agtr1a	4.25	3
	HSCtoMEP	TAL1	Tal1	4.08	3.32
	HSCtoMEP	ACP1	Ptpn14	4.04	8.96
	HSCtoMEP	ASB6	Asb6	3.92	2.6
	HSCtoGMP	MECOM	Mecom	3.88	8.16
	HSCtoGMP	DNMT3A	Dnmt3a	3.88	5.44
	HSCtoGMP	MS4A6A	Dpep2	3.72	1.33333
	HSCtoGMP	TET2	Tet2	3.64	1.08333
	HSCtoGMP	TAL1	Tal1	3.56	10.76
	HSCtoGMP	HOXB4	Hoxb4	3.36	2.45833
	HSCtoMEP	MECOM	Mecom	3.26087	5
	HSCtoGMP	ETV6	Etv6	3.08	5.36
	HSCtoMEP	RUNX1	Runx1	3.08	6.16
	HSCtoMEP	EPB41	Rhag	3.08	4.68
	HSCtoMEP	NFE2	Nfe2	2.91304	3.5
	HSCtoMEP	KIT	Kit	2.88	2.04
	HSCtoGMP	GATA3	Gata3	2.84	5.16
	HSCtoMEP	HOXA5	Hoxa5	2.80952	2.61905
	HSCtoMEP	EGFL7	Egfl7	2.8	6.68
	HSCtoMEP	TSPO2	Atp1b2	2.72	9.8
	HSCtoMEP	ELL2	Slc4a1	2.6	2.25
	HSCtoMEP	GATA3	Gata3	2.52	2.34783
	HSCtoGMP	SMARCC1	Smarcc1	2.48	7.52
	HSCtoMEP	KIF14	Ermap	2.44	9.16
	HSCtoGMP	PRDM16	Prdm16	2.32	1.84
	HSCtoGMP	ETS2	Ets2	2.31818	1.83333
	HSCtoMEP	PRDM16	Prdm16	2.26316	1.63158
	HSCtoGMP	MAP3K1	Pou2f2	2.24	4.70833
	HSCtoMEP	UBC	Ubc	2.23529	2.92
	HSCtoGMP	GFI1	Gfi1	2.125	5.29167
	HSCtoGMP	DIAPH3	Ube2c	2.12	9.52
	HSCtoGMP	POLR2A	Polr2a	2.04545	4.28
	HSCtoGMP	LMO2	Lmo2	2	12.2
	HSCtoMEP	POLR2A	Polr2a	1.91304	2.08333
	HSCtoGMP	ORC1	Blvrb	1.90909	1.91667
	HSCtoMEP	HOXB4	Hoxb4	1.84	1.78261
	HSCtoMEP	HOXA9	Hoxa9	1.8	4
	HSCtoGMP	SERPINF2	Slc22a4	1.8	3.84
	HSCtoMEP	DNMT3A	Dnmt3a	1.68	3.88
	HSCtoMEP	IKZF1	Ikzf1	1.55556	1.69565
	HSCtoMEP	FAM46C	Sphk1	1.41667	5.84
	HSCtoGMP	FAM214B	Tmcc2	1.32	1.25
	HSCtoMEP	HS6ST1	Car2	1.28571	7.4
	HSCtoGMP	HOXA5	Hoxa5	1.2381	3.8
	HSCtoGMP	HEBP1	Hebp1	1.16667	2.90476
	HSCtoGMP	MITF	Mitf	1	1
	HSCtoGMP	BPTF	Bptf	1	7.16
	HSCtoMEP	C6orf106	Fn3k	1	2
	HSCtoMEP	BPTF	Bptf	1	1.90476
	HSCtoGMP	AVPI1	Batf3	1	3
	HSCtoMEP	PACSIN3	Tspo2	1	12.64
	HSCtoGMP	FLI1	Fli1	1	3
	HSCtoGMP	STAM	Snx15	1	2.95652
	HSCtoGMP	RUNX3	Runx3	1	6.92
	HSCtoMEP	EIF2B1	Eif2b1	1	3.04
	HSCtoGMP	MKRN1	Map4k5	1	1
	HSCtoGMP	MTMR3	Rab3il1	1	1.125
	HSCtoGMP	DPEP2	Plxnb2	1	3.52
	HSCtoGMP	EIF2B1	Eif2b1	1	4.36
	HSCtoLMPP	GATA2	Gata2	6.28	6.68
	HSCtoLMPP	PBX1	Pbx1	5.52	6
	HSCtoLMPP	LYL1	Lyl1	5.04	1.84
	HSCtoLMPP	IKZF1	Ikzf1	3.96	1.09524
	HSCtoLMPP	SERPINF2	Slc22a4	3.90909	3
	HSCtoLMPP	NFE2	Nfe2	3.72	2.84
	HSCtoLMPP	EGFL7	Egfl7	3.04	3.16
	HSCtoLMPP	UBC	Ubc	2.96	3.92
	HSCtoLMPP	MEIS1	Meis1	2.36	7.84
	HSCtoLMPP	SMARCC1	Smarcc1	2.33333	1.84
	HSCtoLMPP	ERG	Erg	2.28571	2
	HSCtoLMPP	ETS1	Ets1	2.2	3.24
	HSCtoLMPP	MECOM	Mecom	1.95	5
	HSCtoLMPP	TAL1	Tal1	1.91667	2.08
	HSCtoLMPP	LMO2	Lmo2	1.76923	7.76
	HSCtoLMPP	DENND5B	Blk	1.5	1
	HSCtoLMPP	MYO1C	Blnk	1.42857	4.24
	HSCtoLMPP	MYB	Myb	1.41667	7.76
	HSCtoLMPP	GFI1B	Gfi1b	1.4	3.08
	HSCtoLMPP	HOXA9	Hoxa9	1.3	6.24
	HSCtoLMPP	RUNX3	Runx3	1.16667	1
	HSCtoLMPP	HOXA5	Hoxa5	1.1	2
	HSCtoLMPP	BPTF	Bptf	1	1
	HSCtoLMPP	MAP3K1	Pou2f2	1	3.68
	HSCtoLMPP	GATA3	Gata3	1	2.84
	HSCtoLMPP	POU2F2	Tnfrsf13b	1	1
	HSCtoLMPP	EIF2B1	Eif2b1	1	1.09524
	HSCtoLMPP	KIT	Kit	1	1.16

## Sheet: compare_merge_time_pagerank
	Comparison of merged-time network pagerank between human and mouse
	Trajectory	Gene		Merge_time_pagerank
		Human	Mouse	Human	Mouse
	HSCtoGMP	AVPI1	Batf3	0.00909772	0.0174978
	HSCtoGMP	ORC1	Blvrb	0.0102718	0.00846349
	HSCtoGMP	BPTF	Bptf	0.0163934	0.0177773
	HSCtoGMP	CSF1R	Csf1r	0.0247787	0.0316434
	HSCtoGMP	DNMT3A	Dnmt3a	0.0155335	0.0127882
	HSCtoGMP	MS4A6A	Dpep2	0.0137207	0.00831892
	HSCtoGMP	EGFL7	Egfl7	0.0443218	0.0204313
	HSCtoGMP	EIF2B1	Eif2b1	0.00620688	0.0121081
	HSCtoGMP	ERG	Erg	0.0296306	0.0180165
	HSCtoGMP	ETS2	Ets2	0.0110162	0.00641671
	HSCtoGMP	ETV6	Etv6	0.0116661	0.0128847
	HSCtoGMP	FLI1	Fli1	0.00742863	0.00837913
	HSCtoGMP	GATA2	Gata2	0.0346289	0.0181273
	HSCtoGMP	GATA3	Gata3	0.0129826	0.0137359
	HSCtoGMP	GFI1	Gfi1	0.0104487	0.0157536
	HSCtoGMP	GFI1B	Gfi1b	0.0232131	0.0104723
	HSCtoGMP	HEBP1	Hebp1	0.00728678	0.00944432
	HSCtoGMP	HHEX	Hhex	0.0191383	0.0132827
	HSCtoGMP	HOXA5	Hoxa5	0.00750167	0.0102956
	HSCtoGMP	HOXA9	Hoxa9	0.0165832	0.0160362
	HSCtoGMP	HOXB4	Hoxb4	0.0128814	0.00829833
	HSCtoGMP	IKZF1	Ikzf1	0.018167	0.00743985
	HSCtoGMP	KIT	Kit	0.0173592	0.0226639
	HSCtoGMP	LMO2	Lmo2	0.00991055	0.0264904
	HSCtoGMP	LYL1	Lyl1	0.0362344	0.0147436
	HSCtoGMP	IRF4	Map3k1	0.0258109	0.0100517
	HSCtoGMP	MKRN1	Map4k5	0.00594838	0.00419863
	HSCtoGMP	MECOM	Mecom	0.0167722	0.0196628
	HSCtoGMP	MEIS1	Meis1	0.019158	0.0314643
	HSCtoGMP	MITF	Mitf	0.00733837	0.00455023
	HSCtoGMP	PLXNB2	Ms4a6d	0.016232	0.0104327
	HSCtoGMP	MYB	Myb	0.0427705	0.0239774
	HSCtoGMP	NFE2	Nfe2	0.0168316	0.0208072
	HSCtoGMP	PBX1	Pbx1	0.0289858	0.0223293
	HSCtoGMP	DPEP2	Plxnb2	0.00721592	0.0112767
	HSCtoGMP	POLR2A	Polr2a	0.00940565	0.0121678
	HSCtoGMP	MAP3K1	Pou2f2	0.00987932	0.0139509
	HSCtoGMP	PRDM16	Prdm16	0.00983632	0.00696703
	HSCtoGMP	MTMR3	Rab3il1	0.00757449	0.00594195
	HSCtoGMP	RUNX1	Runx1	0.0262583	0.0147062
	HSCtoGMP	RUNX3	Runx3	0.00573212	0.0166995
	HSCtoGMP	SH2B3	Sh2b3	0.028857	0.00852948
	HSCtoGMP	SERPINF2	Slc22a4	0.00795307	0.0104147
	HSCtoGMP	GYPC	Slc43a1	0.0418706	0.0068454
	HSCtoGMP	SMARCC1	Smarcc1	0.011585	0.0195207
	HSCtoGMP	STAM	Snx15	0.00645039	0.0108276
	HSCtoGMP	BATF3	Spint1	0.0188699	0.00466074
	HSCtoGMP	TAL1	Tal1	0.0137773	0.023742
	HSCtoGMP	TET2	Tet2	0.0136698	0.00468482
	HSCtoGMP	FAM214B	Tmcc2	0.00705801	0.00629331
	HSCtoGMP	POU2F2	Tnfrsf13b	0.0225205	0.00869469
	HSCtoGMP	UBC	Ubc	0.024951	0.0150367
	HSCtoGMP	DIAPH3	Ube2c	0.013964	0.022293
	HSCtoLMPP	DENND5B	Blk	0.0146597	0.0080369
	HSCtoLMPP	MYO1C	Blnk	0.017781	0.0372408
	HSCtoLMPP	BPTF	Bptf	0.0137548	0.0076421
	HSCtoLMPP	EGFL7	Egfl7	0.0263307	0.024052
	HSCtoLMPP	EIF2B1	Eif2b1	0.0136762	0.0100281
	HSCtoLMPP	ERG	Erg	0.0194998	0.0178574
	HSCtoLMPP	ETS1	Ets1	0.0229688	0.0255133
	HSCtoLMPP	GATA2	Gata2	0.0538654	0.0487681
	HSCtoLMPP	GATA3	Gata3	0.0102101	0.026382
	HSCtoLMPP	GFI1B	Gfi1b	0.016387	0.0236311
	HSCtoLMPP	HOXA5	Hoxa5	0.0091191	0.0153394
	HSCtoLMPP	HOXA9	Hoxa9	0.0125161	0.0428366
	HSCtoLMPP	IKZF1	Ikzf1	0.0334511	0.0101137
	HSCtoLMPP	KIT	Kit	0.00860021	0.0108277
	HSCtoLMPP	LMO2	Lmo2	0.0138278	0.053171
	HSCtoLMPP	LYL1	Lyl1	0.0433466	0.0162474
	HSCtoLMPP	MECOM	Mecom	0.0188623	0.0336418
	HSCtoLMPP	MEIS1	Meis1	0.0211252	0.0556359
	HSCtoLMPP	MYB	Myb	0.0139884	0.0564674
	HSCtoLMPP	NFE2	Nfe2	0.031479	0.0230092
	HSCtoLMPP	PBX1	Pbx1	0.0485134	0.0425029
	HSCtoLMPP	MAP3K1	Pou2f2	0.0164096	0.0264292
	HSCtoLMPP	RUNX3	Runx3	0.0165313	0.0094642
	HSCtoLMPP	SERPINF2	Slc22a4	0.0298284	0.0235473
	HSCtoLMPP	SMARCC1	Smarcc1	0.0149698	0.0155841
	HSCtoLMPP	TAL1	Tal1	0.0204746	0.016896
	HSCtoLMPP	POU2F2	Tnfrsf13b	0.00929234	0.0118063
	HSCtoLMPP	UBC	Ubc	0.0262511	0.0292355
	HSCtoMEP	MPP1	Agtr1a	0.0151749	0.00838641
	HSCtoMEP	TSPO2	Atp1b2	0.0112095	0.0213665
	HSCtoMEP	ORC1	Blvrb	0.0237719	0.0236152
	HSCtoMEP	BPTF	Bptf	0.00532752	0.00702912
	HSCtoMEP	HS6ST1	Car2	0.00652603	0.0196449
	HSCtoMEP	DNMT3A	Dnmt3a	0.00776796	0.010625
	HSCtoMEP	EGFL7	Egfl7	0.010645	0.017874
	HSCtoMEP	EIF2B1	Eif2b1	0.00493231	0.00886977
	HSCtoMEP	ALAD	Epor	0.0208552	0.0135281
	HSCtoMEP	ERG	Erg	0.0181982	0.0129452
	HSCtoMEP	KIF14	Ermap	0.00974381	0.021758
	HSCtoMEP	ETV6	Etv6	0.0266371	0.016089
	HSCtoMEP	FLI1	Fli1	0.0206981	0.0126414
	HSCtoMEP	C6orf106	Fn3k	0.0077954	0.00894977
	HSCtoMEP	GATA1	Gata1	0.0244236	0.0240329
	HSCtoMEP	GATA2	Gata2	0.0265184	0.0344267
	HSCtoMEP	GATA3	Gata3	0.00949681	0.00806836
	HSCtoMEP	GFI1B	Gfi1b	0.034574	0.0148748
	HSCtoMEP	SPTB	Hbq1b	0.0154569	0.0158596
	HSCtoMEP	HHEX	Hhex	0.0199616	0.00858382
	HSCtoMEP	HOXA5	Hoxa5	0.0111339	0.00828401
	HSCtoMEP	HOXA9	Hoxa9	0.00808038	0.0106252
	HSCtoMEP	HOXB4	Hoxb4	0.00802158	0.00693247
	HSCtoMEP	ALAS2	Icam4	0.0226639	0.0234375
	HSCtoMEP	IKZF1	Ikzf1	0.0062087	0.00706425
	HSCtoMEP	ITGA2B	Itga2b	0.0384368	0.0219733
	HSCtoMEP	KIT	Kit	0.0109144	0.00809394
	HSCtoMEP	LDB1	Ldb1	0.016319	0.023772
	HSCtoMEP	LMO2	Lmo2	0.015452	0.0228499
	HSCtoMEP	LYL1	Lyl1	0.0214274	0.0260079
	HSCtoMEP	ASB6	Asb6	0.0140616	0.00718206
	HSCtoMEP	MECOM	Mecom	0.0125997	0.0137643
	HSCtoMEP	MEIS1	Meis1	0.0165787	0.0177457
	HSCtoMEP	MYB	Myb	0.0182426	0.011541
	HSCtoMEP	NFE2	Nfe2	0.0108182	0.00978645
	HSCtoMEP	PBX1	Pbx1	0.0253221	0.0128251
	HSCtoMEP	POLR2A	Polr2a	0.00711411	0.00679693
	HSCtoMEP	PRDM16	Prdm16	0.00913578	0.00660703
	HSCtoMEP	ACP1	Ptpn14	0.0140355	0.0201536
	HSCtoMEP	EPB41	Rhag	0.0101803	0.0117362
	HSCtoMEP	RUNX1	Runx1	0.0117648	0.0157625
	HSCtoMEP	GCLM	Sec14l2	0.0226912	0.0109602
	HSCtoMEP	GYPC	Slc43a1	0.0374539	0.00792982
	HSCtoMEP	ELL2	Slc4a1	0.0115793	0.0111125
	HSCtoMEP	SMARCC1	Smarcc1	0.0161918	0.00870071
	HSCtoMEP	FAM46C	Sphk1	0.00694749	0.0146413
	HSCtoMEP	FBXO7	Spta1	0.0292307	0.00813643
	HSCtoMEP	TAL1	Tal1	0.0142114	0.00935099
	HSCtoMEP	POU2F2	Tnfrsf13b	0.0186826	0.0164421
	HSCtoMEP	PACSIN3	Tspo2	0.00668225	0.026689
	HSCtoMEP	UBC	Ubc	0.00920066	0.00883805
	HSCtoMEP	DIAPH3	Ube2c	0.0178478	0.00932712

## Sheet: compare_merge_time_betweenness
	Comparison of merged-time network pagerank between human and mouse
	Trajectory	Gene		Merge_time_betweenness
		Human	Mouse	Human	Mouse
	HSCtoGMP	AVPI1	Batf3	0	114.649
	HSCtoGMP	ORC1	Blvrb	54.1174	31.4439
	HSCtoGMP	BPTF	Bptf	0	90.2428
	HSCtoGMP	CSF1R	Csf1r	80.8058	477.808
	HSCtoGMP	DNMT3A	Dnmt3a	20.6365	12.6035
	HSCtoGMP	MS4A6A	Dpep2	24.9058	2.21753
	HSCtoGMP	EGFL7	Egfl7	278.218	108.801
	HSCtoGMP	EIF2B1	Eif2b1	0	64.9586
	HSCtoGMP	ERG	Erg	96.1532	85.6847
	HSCtoGMP	ETS2	Ets2	6.254	36.9386
	HSCtoGMP	ETV6	Etv6	13.5511	22.2088
	HSCtoGMP	FLI1	Fli1	0	7.14451
	HSCtoGMP	GATA2	Gata2	189.198	61.7975
	HSCtoGMP	GATA3	Gata3	13.7172	30.478
	HSCtoGMP	GFI1	Gfi1	11.5475	124.484
	HSCtoGMP	GFI1B	Gfi1b	84.182	4.28164
	HSCtoGMP	HEBP1	Hebp1	8.5	37.2204
	HSCtoGMP	HHEX	Hhex	83.5853	28.7444
	HSCtoGMP	HOXA5	Hoxa5	1.2717	29.963
	HSCtoGMP	HOXA9	Hoxa9	44.6203	77.104
	HSCtoGMP	HOXB4	Hoxb4	17.734	29.4403
	HSCtoGMP	IKZF1	Ikzf1	40.8794	4.81191
	HSCtoGMP	KIT	Kit	29.2978	149.37
	HSCtoGMP	LMO2	Lmo2	10.691	104.431
	HSCtoGMP	LYL1	Lyl1	183.007	65.2315
	HSCtoGMP	IRF4	Map3k1	84.4077	40.5025
	HSCtoGMP	MKRN1	Map4k5	0	0
	HSCtoGMP	MECOM	Mecom	31.9438	73.6927
	HSCtoGMP	MEIS1	Meis1	58.6622	160.717
	HSCtoGMP	MITF	Mitf	0	0
	HSCtoGMP	PLXNB2	Ms4a6d	41.791	215.712
	HSCtoGMP	MYB	Myb	209.167	169.983
	HSCtoGMP	NFE2	Nfe2	36.7728	139.729
	HSCtoGMP	PBX1	Pbx1	213.428	135.784
	HSCtoGMP	DPEP2	Plxnb2	0	15.2568
	HSCtoGMP	POLR2A	Polr2a	5.18182	23.5162
	HSCtoGMP	MAP3K1	Pou2f2	19.7685	88.6242
	HSCtoGMP	PRDM16	Prdm16	12.5705	6.39883
	HSCtoGMP	MTMR3	Rab3il1	0	0.854503
	HSCtoGMP	RUNX1	Runx1	94.0147	35.9232
	HSCtoGMP	RUNX3	Runx3	0	104.024
	HSCtoGMP	SH2B3	Sh2b3	61.681	16.5602
	HSCtoGMP	SERPINF2	Slc22a4	2.03874	28.4273
	HSCtoGMP	GYPC	Slc43a1	312.969	7.2507
	HSCtoGMP	SMARCC1	Smarcc1	41.9711	109.418
	HSCtoGMP	STAM	Snx15	0	55.0823
	HSCtoGMP	BATF3	Spint1	43.976	2.26083
	HSCtoGMP	TAL1	Tal1	18.9916	184.459
	HSCtoGMP	TET2	Tet2	31.2438	0.848985
	HSCtoGMP	FAM214B	Tmcc2	2.57901	2.3006
	HSCtoGMP	POU2F2	Tnfrsf13b	38.908	17.9003
	HSCtoGMP	UBC	Ubc	113.489	97.6913
	HSCtoGMP	DIAPH3	Ube2c	55.1364	211.889
	HSCtoLMPP	DENND5B	Blk	0	0
	HSCtoLMPP	MYO1C	Blnk	0	95.6641
	HSCtoLMPP	BPTF	Bptf	0	0
	HSCtoLMPP	EGFL7	Egfl7	48.5408	31.4119
	HSCtoLMPP	EIF2B1	Eif2b1	0	0.248378
	HSCtoLMPP	ERG	Erg	44.1331	4.32
	HSCtoLMPP	ETS1	Ets1	38.359	13.8368
	HSCtoLMPP	GATA2	Gata2	99.5538	79.0955
	HSCtoLMPP	GATA3	Gata3	0	68.3342
	HSCtoLMPP	GFI1B	Gfi1b	11.9653	5.20355
	HSCtoLMPP	HOXA5	Hoxa5	0	7.1254
	HSCtoLMPP	HOXA9	Hoxa9	1.83333	64.3907
	HSCtoLMPP	IKZF1	Ikzf1	87.4943	0.386999
	HSCtoLMPP	KIT	Kit	0	1.26818
	HSCtoLMPP	LMO2	Lmo2	13.2289	124.585
	HSCtoLMPP	LYL1	Lyl1	85.1724	0
	HSCtoLMPP	MECOM	Mecom	20.3508	41.0477
	HSCtoLMPP	MEIS1	Meis1	32.6986	129.671
	HSCtoLMPP	MYB	Myb	60.9746	128.145
	HSCtoLMPP	NFE2	Nfe2	22.8814	55.9873
	HSCtoLMPP	PBX1	Pbx1	83.52	64.4585
	HSCtoLMPP	MAP3K1	Pou2f2	0	48.0021
	HSCtoLMPP	RUNX3	Runx3	32.9259	0
	HSCtoLMPP	SERPINF2	Slc22a4	169.717	39.5313
	HSCtoLMPP	SMARCC1	Smarcc1	24.7183	3.69739
	HSCtoLMPP	TAL1	Tal1	12.7646	0.0809524
	HSCtoLMPP	POU2F2	Tnfrsf13b	0	0
	HSCtoLMPP	UBC	Ubc	26.5847	27.3143
	HSCtoMEP	MPP1	Agtr1a	54.2657	52.1622
	HSCtoMEP	TSPO2	Atp1b2	24.7354	87.4213
	HSCtoMEP	ORC1	Blvrb	93.6986	75.057
	HSCtoMEP	BPTF	Bptf	0	8.44402
	HSCtoMEP	HS6ST1	Car2	0.362806	124.257
	HSCtoMEP	DNMT3A	Dnmt3a	7.41582	28.5969
	HSCtoMEP	EGFL7	Egfl7	20.1755	73.2483
	HSCtoMEP	EIF2B1	Eif2b1	0	20.4777
	HSCtoMEP	ALAD	Epor	119.545	64.602
	HSCtoMEP	ERG	Erg	81.1415	45.2802
	HSCtoMEP	KIF14	Ermap	10.0228	195.218
	HSCtoMEP	ETV6	Etv6	125.13	56.2504
	HSCtoMEP	FLI1	Fli1	51.2263	50.124
	HSCtoMEP	C6orf106	Fn3k	0	0
	HSCtoMEP	GATA1	Gata1	125.944	91.2987
	HSCtoMEP	GATA2	Gata2	237.125	313.77
	HSCtoMEP	GATA3	Gata3	13.3329	16.5146
	HSCtoMEP	GFI1B	Gfi1b	233.834	45.5228
	HSCtoMEP	SPTB	Hbq1b	46.4334	135.8
	HSCtoMEP	HHEX	Hhex	78.9478	36.5136
	HSCtoMEP	HOXA5	Hoxa5	12.8342	19.9185
	HSCtoMEP	HOXA9	Hoxa9	12.1154	37.6758
	HSCtoMEP	HOXB4	Hoxb4	11.6538	8.6251
	HSCtoMEP	ALAS2	Icam4	92.0895	117.454
	HSCtoMEP	IKZF1	Ikzf1	0	17.0642
	HSCtoMEP	ITGA2B	Itga2b	305.387	181.946
	HSCtoMEP	KIT	Kit	21.4383	18.4177
	HSCtoMEP	LDB1	Ldb1	32.2674	155.78
	HSCtoMEP	LMO2	Lmo2	36.8734	179.007
	HSCtoMEP	LYL1	Lyl1	97.796	174.111
	HSCtoMEP	ASB6	Asb6	42.7963	28.8271
	HSCtoMEP	MECOM	Mecom	36.678	70.2543
	HSCtoMEP	MEIS1	Meis1	43.1533	101.942
	HSCtoMEP	MYB	Myb	84.8353	83.7253
	HSCtoMEP	NFE2	Nfe2	6.59176	11.5637
	HSCtoMEP	PBX1	Pbx1	121.045	61.8589
	HSCtoMEP	POLR2A	Polr2a	2.98363	3.36979
	HSCtoMEP	PRDM16	Prdm16	10.7273	13.1472
	HSCtoMEP	ACP1	Ptpn14	63.0247	108.076
	HSCtoMEP	EPB41	Rhag	21.3102	47.5266
	HSCtoMEP	RUNX1	Runx1	30.0544	72.9242
	HSCtoMEP	GCLM	Sec14l2	92.9761	125.505
	HSCtoMEP	GYPC	Slc43a1	208.763	7.17963
	HSCtoMEP	ELL2	Slc4a1	40.4608	0.25
	HSCtoMEP	SMARCC1	Smarcc1	43.8663	21.981
	HSCtoMEP	FAM46C	Sphk1	13.4767	47.44
	HSCtoMEP	FBXO7	Spta1	108.269	27.5405
	HSCtoMEP	TAL1	Tal1	43.8212	19.8866
	HSCtoMEP	POU2F2	Tnfrsf13b	87.0249	54.3709
	HSCtoMEP	PACSIN3	Tspo2	0	95.7028
	HSCtoMEP	UBC	Ubc	24.7754	37.0668
	HSCtoMEP	DIAPH3	Ube2c	54.2158	29.5631

## Sheet: compare_merge_time_hindex
	Comparison of merged-time network hindex between human and mouse
	Trajectory	Gene		Merge_time_hindex
		Human	Mouse	Human	Mouse
	HSCtoGMP	AVPI1	Batf3	2	6.25
	HSCtoGMP	BATF3	Spint1	28.36	8
	HSCtoGMP	BPTF	Bptf	2	44.28
	HSCtoGMP	CSF1R	Csf1r	42.44	55.28
	HSCtoGMP	DIAPH3	Ube2c	7.68	59.68
	HSCtoGMP	DNMT3A	Dnmt3a	21.64	39
	HSCtoGMP	DPEP2	Plxnb2	3.5	17.68
	HSCtoGMP	EGFL7	Egfl7	67.92	49.64
	HSCtoGMP	EIF2B1	Eif2b1	5.57143	24.56
	HSCtoGMP	ERG	Erg	43.84	58.56
	HSCtoGMP	ETS2	Ets2	9	10.8333
	HSCtoGMP	ETV6	Etv6	19.68	34.72
	HSCtoGMP	FAM214B	Tmcc2	7.36	5.25
	HSCtoGMP	FLI1	Fli1	2.5	19.24
	HSCtoGMP	GATA2	Gata2	44.88	47.32
	HSCtoGMP	GATA3	Gata3	11.56	28.08
	HSCtoGMP	GFI1	Gfi1	9.95833	24.2083
	HSCtoGMP	GFI1B	Gfi1b	30.6	29.76
	HSCtoGMP	GYPC	Slc43a1	38.4	9.54545
	HSCtoGMP	HHEX	Hhex	22.48	38.36
	HSCtoGMP	HOXA5	Hoxa5	6.95238	24.12
	HSCtoGMP	HOXA9	Hoxa9	30.28	43.96
	HSCtoGMP	HOXB4	Hoxb4	21.48	11.6667
	HSCtoGMP	IKZF1	Ikzf1	20.32	10
	HSCtoGMP	IRF4	Map3k1	36.32	15.375
	HSCtoGMP	KIT	Kit	26	68.28
	HSCtoGMP	LMO2	Lmo2	9.08	78.24
	HSCtoGMP	LYL1	Lyl1	55.52	37.6957
	HSCtoGMP	MAP3K1	Pou2f2	12.04	21.0833
	HSCtoGMP	MECOM	Mecom	15.48	48.4
	HSCtoGMP	MEIS1	Meis1	24.44	87.44
	HSCtoGMP	MITF	Mitf	2.71429	4.95238
	HSCtoGMP	MKRN1	Map4k5	5.12	6.33333
	HSCtoGMP	MS4A6A	Dpep2	22.92	3.54167
	HSCtoGMP	MTMR3	Rab3il1	3	4.33333
	HSCtoGMP	MYB	Myb	62.28	35.04
	HSCtoGMP	NFE2	Nfe2	25.6	47.72
	HSCtoGMP	ORC1	Blvrb	7.95455	7.54167
	HSCtoGMP	PBX1	Pbx1	28.32	51.4
	HSCtoGMP	PLXNB2	Ms4a6d	28.9167	11.7917
	HSCtoGMP	POLR2A	Polr2a	10.0455	21.64
	HSCtoGMP	POU2F2	Tnfrsf13b	35.44	15.5217
	HSCtoGMP	PRDM16	Prdm16	13.8	7.88
	HSCtoGMP	RUNX1	Runx1	27.92	24.125
	HSCtoGMP	RUNX3	Runx3	4.66667	41.84
	HSCtoGMP	SERPINF2	Slc22a4	11.35	25.4
	HSCtoGMP	SH2B3	Sh2b3	49.6	4.16667
	HSCtoGMP	SMARCC1	Smarcc1	12.08	36.6
	HSCtoGMP	STAM	Snx15	4.44444	11.7391
	HSCtoGMP	TAL1	Tal1	20.04	69.44
	HSCtoGMP	TET2	Tet2	21.72	6.29167
	HSCtoGMP	UBC	Ubc	28.96	21.32
	HSCtoLMPP	BPTF	Bptf	2	6
	HSCtoLMPP	DENND5B	Blk	4.5	5
	HSCtoLMPP	EGFL7	Egfl7	9.56	11.96
	HSCtoLMPP	EIF2B1	Eif2b1	2	4.66667
	HSCtoLMPP	ERG	Erg	7.66667	7.76
	HSCtoLMPP	ETS1	Ets1	7	11.8
	HSCtoLMPP	GATA2	Gata2	20.52	19.6
	HSCtoLMPP	GATA3	Gata3	4.3125	9.92
	HSCtoLMPP	GFI1B	Gfi1b	5.4	10.72
	HSCtoLMPP	HOXA5	Hoxa5	4.9	10.1905
	HSCtoLMPP	HOXA9	Hoxa9	5.2	27.28
	HSCtoLMPP	IKZF1	Ikzf1	14.2	4.66667
	HSCtoLMPP	KIT	Kit	3	4.8
	HSCtoLMPP	LMO2	Lmo2	6.07692	29.92
	HSCtoLMPP	LYL1	Lyl1	17	7.12
	HSCtoLMPP	MAP3K1	Pou2f2	2.85714	14.04
	HSCtoLMPP	MECOM	Mecom	7.1	25.32
	HSCtoLMPP	MEIS1	Meis1	9.2	25.32
	HSCtoLMPP	MYB	Myb	5.25	25.24
	HSCtoLMPP	MYO1C	Blnk	4.28571	12.28
	HSCtoLMPP	NFE2	Nfe2	14.68	10.68
	HSCtoLMPP	PBX1	Pbx1	19.4	19.32
	HSCtoLMPP	POU2F2	Tnfrsf13b	3	3.16
	HSCtoLMPP	RUNX3	Runx3	3	6
	HSCtoLMPP	SERPINF2	Slc22a4	12.5455	11.84
	HSCtoLMPP	SMARCC1	Smarcc1	8.33333	8.2
	HSCtoLMPP	TAL1	Tal1	6.875	7.56
	HSCtoLMPP	UBC	Ubc	10.88	15.48
	HSCtoMEP	ACP1	Ptpn14	22.16	56.88
	HSCtoMEP	ALAD	Epor	45.16	44.12
	HSCtoMEP	ALAS2	Icam4	33.72	56.92
	HSCtoMEP	BPTF	Bptf	5.14286	9.38095
	HSCtoMEP	C6orf106	Fn3k	2	6
	HSCtoMEP	DIAPH3	Ube2c	26.48	19.1667
	HSCtoMEP	DNMT3A	Dnmt3a	7.84	24.36
	HSCtoMEP	EGFL7	Egfl7	13.68	36.56
	HSCtoMEP	EIF2B1	Eif2b1	6	17.68
	HSCtoMEP	ELL2	Slc4a1	11.32	6
	HSCtoMEP	EPB41	Rhag	21.36	28.96
	HSCtoMEP	ERG	Erg	40.24	31.84
	HSCtoMEP	ETV6	Etv6	44.6	46.4
	HSCtoMEP	FAM46C	Sphk1	7.45833	33.32
	HSCtoMEP	FBXO7	Spta1	54.76	17.3684
	HSCtoMEP	FLI1	Fli1	40.12	34.04
	HSCtoMEP	GATA1	Gata1	52.8	63.52
	HSCtoMEP	GATA2	Gata2	40.24	55.6
	HSCtoMEP	GATA3	Gata3	13.4	12.3478
	HSCtoMEP	GCLM	Sec14l2	35.68	13.6667
	HSCtoMEP	GFI1B	Gfi1b	57.44	49.48
	HSCtoMEP	GYPC	Slc43a1	73.08	16.24
	HSCtoMEP	HHEX	Hhex	35.12	17.9444
	HSCtoMEP	HOXA5	Hoxa5	12.5238	14.7619
	HSCtoMEP	HOXA9	Hoxa9	7.2	25.76
	HSCtoMEP	HOXB4	Hoxb4	8.96	8.43478
	HSCtoMEP	HS6ST1	Car2	6.64286	36.6
	HSCtoMEP	IKZF1	Ikzf1	10.5	7.34783
	HSCtoMEP	ITGA2B	Itga2b	43.84	35.2727
	HSCtoMEP	KIF14	Ermap	11	48.76
	HSCtoMEP	KIT	Kit	15.24	9.28
	HSCtoMEP	LDB1	Ldb1	37.44	58.88
	HSCtoMEP	LMO2	Lmo2	31.32	40.72
	HSCtoMEP	LYL1	Lyl1	27.84	51.68
	HSCtoMEP	MECOM	Mecom	15.4348	28.8
	HSCtoMEP	MEIS1	Meis1	30.24	34.32
	HSCtoMEP	MPP1	Agtr1a	20.0417	16.9286
	HSCtoMEP	MYB	Myb	24.36	23.48
	HSCtoMEP	NFE2	Nfe2	14.3478	20.1111
	HSCtoMEP	ORC1	Blvrb	43.6	77.48
	HSCtoMEP	PACSIN3	Tspo2	3.45455	80.16
	HSCtoMEP	PBX1	Pbx1	31.64	21.88
	HSCtoMEP	POLR2A	Polr2a	14.913	13.0417
	HSCtoMEP	POU2F2	Tnfrsf13b	33.52	49.8
	HSCtoMEP	PRDM16	Prdm16	11.4211	8.05263
	HSCtoMEP	RUNX1	Runx1	15.36	33.8
	HSCtoMEP	SMARCC1	Smarcc1	24.2	13.75
	HSCtoMEP	SPTB	Hbq1b	21.84	8
	HSCtoMEP	TAL1	Tal1	21.24	19.6
	HSCtoMEP	TSPO2	Atp1b2	12.64	61.76
	HSCtoMEP	UBC	Ubc	10.4118	16.6

## Sheet: diameter
	Network Diameters of networks
	Species	Trajectory	timepoint	diameter
	mouse	HSCtoGMP	1	7
	mouse	HSCtoGMP	2	9
	mouse	HSCtoGMP	3	9
	mouse	HSCtoGMP	4	9
	mouse	HSCtoGMP	5	9
	mouse	HSCtoGMP	6	9
	mouse	HSCtoGMP	7	9
	mouse	HSCtoGMP	8	9
	mouse	HSCtoGMP	9	9
	mouse	HSCtoGMP	10	9
	mouse	HSCtoGMP	11	9
	mouse	HSCtoGMP	12	9
	mouse	HSCtoGMP	13	9
	mouse	HSCtoGMP	14	9
	mouse	HSCtoGMP	15	9
	mouse	HSCtoGMP	16	9
	mouse	HSCtoGMP	17	6
	mouse	HSCtoGMP	18	6
	mouse	HSCtoGMP	19	7
	mouse	HSCtoGMP	20	7
	mouse	HSCtoGMP	21	9
	mouse	HSCtoGMP	22	9
	mouse	HSCtoGMP	23	6
	mouse	HSCtoGMP	24	6
	mouse	HSCtoGMP	25	7
	mouse	HSCtoMEP	1	6
	mouse	HSCtoMEP	2	6
	mouse	HSCtoMEP	3	6
	mouse	HSCtoMEP	4	7
	mouse	HSCtoMEP	5	7
	mouse	HSCtoMEP	6	7
	mouse	HSCtoMEP	7	6
	mouse	HSCtoMEP	8	6
	mouse	HSCtoMEP	9	6
	mouse	HSCtoMEP	10	6
	mouse	HSCtoMEP	11	6
	mouse	HSCtoMEP	12	6
	mouse	HSCtoMEP	13	6
	mouse	HSCtoMEP	14	5
	mouse	HSCtoMEP	15	6
	mouse	HSCtoMEP	16	5
	mouse	HSCtoMEP	17	7
	mouse	HSCtoMEP	18	6
	mouse	HSCtoMEP	19	5
	mouse	HSCtoMEP	20	6
	mouse	HSCtoMEP	21	6
	mouse	HSCtoMEP	22	8
	mouse	HSCtoMEP	23	10
	mouse	HSCtoMEP	24	8
	mouse	HSCtoMEP	25	6
	mouse	HSCtoLMPP	1	6
	mouse	HSCtoLMPP	2	6
	mouse	HSCtoLMPP	3	6
	mouse	HSCtoLMPP	4	6
	mouse	HSCtoLMPP	5	6
	mouse	HSCtoLMPP	6	6
	mouse	HSCtoLMPP	7	6
	mouse	HSCtoLMPP	8	7
	mouse	HSCtoLMPP	9	7
	mouse	HSCtoLMPP	10	7
	mouse	HSCtoLMPP	11	7
	mouse	HSCtoLMPP	12	6
	mouse	HSCtoLMPP	13	6
	mouse	HSCtoLMPP	14	6
	mouse	HSCtoLMPP	15	6
	mouse	HSCtoLMPP	16	6
	mouse	HSCtoLMPP	17	6
	mouse	HSCtoLMPP	18	6
	mouse	HSCtoLMPP	19	6
	mouse	HSCtoLMPP	20	6
	mouse	HSCtoLMPP	21	6
	mouse	HSCtoLMPP	22	6
	mouse	HSCtoLMPP	23	6
	mouse	HSCtoLMPP	24	5
	mouse	HSCtoLMPP	25	5
	human	HSCtoGMP	1	8
	human	HSCtoGMP	2	8
	human	HSCtoGMP	3	8
	human	HSCtoGMP	4	8
	human	HSCtoGMP	5	7
	human	HSCtoGMP	6	7
	human	HSCtoGMP	7	7
	human	HSCtoGMP	8	7
	human	HSCtoGMP	9	7
	human	HSCtoGMP	10	7
	human	HSCtoGMP	11	7
	human	HSCtoGMP	12	7
	human	HSCtoGMP	13	8
	human	HSCtoGMP	14	8
	human	HSCtoGMP	15	8
	human	HSCtoGMP	16	8
	human	HSCtoGMP	17	8
	human	HSCtoGMP	18	8
	human	HSCtoGMP	19	8
	human	HSCtoGMP	20	8
	human	HSCtoGMP	21	8
	human	HSCtoGMP	22	8
	human	HSCtoGMP	23	6
	human	HSCtoGMP	24	5
	human	HSCtoGMP	25	8
	human	HSCtoMEP	1	6
	human	HSCtoMEP	2	6
	human	HSCtoMEP	3	6
	human	HSCtoMEP	4	6
	human	HSCtoMEP	5	6
	human	HSCtoMEP	6	6
	human	HSCtoMEP	7	6
	human	HSCtoMEP	8	6
	human	HSCtoMEP	9	6
	human	HSCtoMEP	10	6
	human	HSCtoMEP	11	7
	human	HSCtoMEP	12	7
	human	HSCtoMEP	13	8
	human	HSCtoMEP	14	7
	human	HSCtoMEP	15	6
	human	HSCtoMEP	16	6
	human	HSCtoMEP	17	6
	human	HSCtoMEP	18	6
	human	HSCtoMEP	19	6
	human	HSCtoMEP	20	6
	human	HSCtoMEP	21	6
	human	HSCtoMEP	22	6
	human	HSCtoMEP	23	6
	human	HSCtoMEP	24	5
	human	HSCtoMEP	25	5
	human	HSCtoLMPP	1	10
	human	HSCtoLMPP	2	10
	human	HSCtoLMPP	3	11
	human	HSCtoLMPP	4	8
	human	HSCtoLMPP	5	7
	human	HSCtoLMPP	6	7
	human	HSCtoLMPP	7	7
	human	HSCtoLMPP	8	7
	human	HSCtoLMPP	9	5
	human	HSCtoLMPP	10	6
	human	HSCtoLMPP	11	6
	human	HSCtoLMPP	12	7
	human	HSCtoLMPP	13	7
	human	HSCtoLMPP	14	7
	human	HSCtoLMPP	15	7
	human	HSCtoLMPP	16	7
	human	HSCtoLMPP	17	8
	human	HSCtoLMPP	18	11
	human	HSCtoLMPP	19	10
	human	HSCtoLMPP	20	10
	human	HSCtoLMPP	21	10
	human	HSCtoLMPP	22	12
	human	HSCtoLMPP	23	10
	human	HSCtoLMPP	24	10
	human	HSCtoLMPP	25	9

## Sheet: smallworld Time-varying network
	Network Features of networks
Trajectory	timepoint	Network Length	Average of Network Length of same sized random network	SD of Network Length of same sized random network	CC	Average of CC of same sized random network	SD of CC of same sized random network	Species
HSCtoMEP	1	2.73742	2.64946	0.0249613	0.204768	0.0858637	0.0166731	mouse
HSCtoMEP	2	2.67617	2.54084	0.0283721	0.225783	0.0856021	0.0204198	mouse
HSCtoMEP	3	2.69052	2.5172	0.0141766	0.312803	0.0929818	0.015391	mouse
HSCtoMEP	4	2.93706	2.8088	0.0390215	0.203622	0.0790501	0.0229113	mouse
HSCtoMEP	5	3.00895	2.82084	0.0354274	0.213194	0.0717867	0.0173565	mouse
HSCtoMEP	6	3.00839	2.68615	0.030911	0.202565	0.0788668	0.0182805	mouse
HSCtoMEP	7	3.05699	2.71869	0.0336784	0.294625	0.0769982	0.0150728	mouse
HSCtoMEP	8	2.83582	2.55309	0.0219855	0.319778	0.0878571	0.024383	mouse
HSCtoMEP	9	2.80477	2.53567	0.0209479	0.295966	0.0882508	0.0149418	mouse
HSCtoMEP	10	2.78835	2.58025	0.02424	0.236708	0.0885639	0.0179705	mouse
HSCtoMEP	11	2.8474	2.73727	0.0310007	0.275806	0.0665462	0.0175884	mouse
HSCtoMEP	12	2.89462	2.85737	0.0544647	0.295315	0.0606067	0.0176723	mouse
HSCtoMEP	13	2.81647	2.86264	0.0557804	0.351803	0.06853	0.0190052	mouse
HSCtoMEP	14	2.63591	2.88364	0.043244	0.424747	0.0668037	0.0177072	mouse
HSCtoMEP	15	2.68199	2.62161	0.0304251	0.413679	0.0844599	0.0158379	mouse
HSCtoMEP	16	2.7354	2.58621	0.0245803	0.436487	0.0874466	0.0192931	mouse
HSCtoMEP	17	2.79008	2.55804	0.0172812	0.384803	0.0815005	0.0179923	mouse
HSCtoMEP	18	2.75241	2.5707	0.0258304	0.35224	0.0814629	0.0169302	mouse
HSCtoMEP	19	2.77557	2.76538	0.0361085	0.410524	0.0744897	0.0179419	mouse
HSCtoMEP	20	2.76604	2.59084	0.0280697	0.35031	0.0793471	0.0144063	mouse
HSCtoMEP	21	2.76183	2.56859	0.0175025	0.381744	0.0745513	0.0113163	mouse
HSCtoMEP	22	3.06946	2.54736	0.0178121	0.385105	0.0804352	0.013889	mouse
HSCtoMEP	23	3.58012	2.90792	0.028982	0.245689	0.0661687	0.0207567	mouse
HSCtoMEP	24	3.24278	2.61114	0.0224829	0.40638	0.077675	0.0151093	mouse
HSCtoMEP	25	2.87082	2.56324	0.0141246	0.306166	0.0808807	0.0115396	mouse
HSCtoLMPP	1	3.04318	2.95351	0.111956	0.313836	0.082706	0.0373919	mouse
HSCtoLMPP	2	3.04318	2.9887	0.108555	0.313836	0.0840524	0.0368047	mouse
HSCtoLMPP	3	3.04318	2.9353	0.13237	0.313836	0.101749	0.0422857	mouse
HSCtoLMPP	4	3.04318	2.95886	0.131031	0.313836	0.0930289	0.0493894	mouse
HSCtoLMPP	5	3.04318	2.96623	0.101712	0.313836	0.0864575	0.033558	mouse
HSCtoLMPP	6	3.04318	3.01533	0.0846065	0.313836	0.0854546	0.0380646	mouse
HSCtoLMPP	7	3.04318	2.97463	0.104939	0.313836	0.0855317	0.0384613	mouse
HSCtoLMPP	8	3.13268	2.93725	0.12053	0.315321	0.0988482	0.0479331	mouse
HSCtoLMPP	9	3.13268	2.91018	0.182042	0.315321	0.100398	0.0454316	mouse
HSCtoLMPP	10	3.13268	2.89084	0.168665	0.315321	0.0985353	0.0462159	mouse
HSCtoLMPP	11	3.13268	2.91813	0.12785	0.315321	0.0967331	0.0587089	mouse
HSCtoLMPP	12	3.04318	2.96931	0.137759	0.313836	0.0927877	0.0355939	mouse
HSCtoLMPP	13	3.04318	2.94449	0.112154	0.313836	0.0986895	0.0475306	mouse
HSCtoLMPP	14	3.04318	2.99528	0.10287	0.313836	0.0851052	0.0457097	mouse
HSCtoLMPP	15	3.04318	2.95885	0.106409	0.313836	0.083949	0.0416218	mouse
HSCtoLMPP	16	3.04318	2.97025	0.16601	0.313836	0.0894215	0.0425508	mouse
HSCtoLMPP	17	3.04318	2.9509	0.114485	0.313836	0.0935262	0.03597	mouse
HSCtoLMPP	18	3.04318	2.91879	0.0960499	0.313836	0.0803825	0.0387624	mouse
HSCtoLMPP	19	3.04318	2.98202	0.119872	0.313836	0.0863125	0.0455459	mouse
HSCtoLMPP	20	3.04318	2.89128	0.09093	0.313836	0.0930885	0.0337887	mouse
HSCtoLMPP	21	3.04318	2.93334	0.101637	0.313836	0.0815504	0.0290452	mouse
HSCtoLMPP	22	3.04318	3.00223	0.114312	0.313836	0.0680898	0.024907	mouse
HSCtoLMPP	23	3.04318	2.98304	0.0831977	0.313836	0.0886561	0.036284	mouse
HSCtoLMPP	24	2.65859	2.74728	0.053929	0.23779	0.0959141	0.0324621	mouse
HSCtoLMPP	25	2.65859	2.7638	0.0733176	0.23779	0.0866178	0.0260331	mouse
HSCtoGMP	1	3.11104	2.90987	0.0471126	0.234563	0.079755	0.0232638	mouse
HSCtoGMP	2	3.1162	2.66769	0.0173095	0.281662	0.0814985	0.0178633	mouse
HSCtoGMP	3	3.1162	2.67119	0.0311994	0.281662	0.0863765	0.0188879	mouse
HSCtoGMP	4	3.1162	2.67092	0.0226143	0.281662	0.0716014	0.0157959	mouse
HSCtoGMP	5	3.1162	2.66819	0.0266862	0.281662	0.0807477	0.0157088	mouse
HSCtoGMP	6	3.1162	2.66045	0.0326705	0.281662	0.0739414	0.015873	mouse
HSCtoGMP	7	3.1162	2.66484	0.0321226	0.281662	0.0731148	0.0153747	mouse
HSCtoGMP	8	3.1162	2.66	0.0291829	0.281662	0.0782555	0.0205839	mouse
HSCtoGMP	9	3.1162	2.66719	0.0332988	0.281662	0.0753424	0.0158134	mouse
HSCtoGMP	10	3.1162	2.6668	0.0299358	0.281662	0.0759289	0.0146736	mouse
HSCtoGMP	11	3.1162	2.66136	0.021629	0.281662	0.079223	0.0148776	mouse
HSCtoGMP	12	3.1162	2.66488	0.0306672	0.281662	0.07822	0.0208225	mouse
HSCtoGMP	13	3.1162	2.66702	0.0252455	0.281662	0.0784549	0.0114638	mouse
HSCtoGMP	14	3.1162	2.6643	0.0265949	0.281662	0.0719612	0.012165	mouse
HSCtoGMP	15	3.1162	2.68109	0.0309707	0.281662	0.0763446	0.0174064	mouse
HSCtoGMP	16	3.1162	2.66368	0.0277961	0.281662	0.0802021	0.0144659	mouse
HSCtoGMP	17	2.76907	2.94197	0.0590868	0.234624	0.0702633	0.0235712	mouse
HSCtoGMP	18	2.86875	2.95482	0.0423814	0.341782	0.0623156	0.0242841	mouse
HSCtoGMP	19	2.88467	2.90993	0.0420178	0.312869	0.0694973	0.0170403	mouse
HSCtoGMP	20	3.14518	3.06498	0.055702	0.354507	0.063617	0.0214311	mouse
HSCtoGMP	21	3.1162	2.67342	0.022765	0.281662	0.0786981	0.0164075	mouse
HSCtoGMP	22	3.1162	2.65855	0.0282118	0.281662	0.0801782	0.0145447	mouse
HSCtoGMP	23	2.89261	2.75335	0.0317927	0.227433	0.0706098	0.0137064	mouse
HSCtoGMP	24	2.86739	2.78428	0.0322417	0.20267	0.0758232	0.0187038	mouse
HSCtoGMP	25	3.08143	2.88413	0.0455173	0.243593	0.0650462	0.019752	mouse
HSCtoMEP	1	2.9375	2.6658	0.0482952	0.306178	0.0860396	0.0200429	human
HSCtoMEP	2	2.9375	2.65836	0.0265018	0.306178	0.0804904	0.0234029	human
HSCtoMEP	3	2.9375	2.65355	0.0301206	0.306178	0.0871029	0.0188837	human
HSCtoMEP	4	2.9375	2.66575	0.0371048	0.306178	0.0874289	0.0213601	human
HSCtoMEP	5	2.9375	2.65136	0.0379947	0.306178	0.0791997	0.0151422	human
HSCtoMEP	6	2.9375	2.65602	0.03037	0.306178	0.0826925	0.0209503	human
HSCtoMEP	7	2.9375	2.66466	0.0246329	0.306178	0.076622	0.0191072	human
HSCtoMEP	8	2.9375	2.65687	0.0270647	0.306178	0.0745141	0.0198786	human
HSCtoMEP	9	2.9375	2.66987	0.0222301	0.306178	0.0806796	0.0146079	human
HSCtoMEP	10	2.9375	2.6682	0.0305083	0.306178	0.0809906	0.0270152	human
HSCtoMEP	11	3.02976	2.92771	0.0559739	0.216962	0.0726095	0.028025	human
HSCtoMEP	12	3.10446	2.98916	0.0660844	0.233114	0.0631138	0.0201397	human
HSCtoMEP	13	3.33385	3.21656	0.0850067	0.201532	0.0637599	0.0218793	human
HSCtoMEP	14	3.08709	3.11634	0.0991519	0.198503	0.067504	0.0244567	human
HSCtoMEP	15	3.10714	3.1034	0.0707774	0.274161	0.0606117	0.0233292	human
HSCtoMEP	16	3.0726	3.14151	0.0856532	0.254045	0.0616389	0.0232776	human
HSCtoMEP	17	3.09619	3.05575	0.0677827	0.261093	0.0714812	0.0358227	human
HSCtoMEP	18	2.8726	2.86538	0.0439022	0.309746	0.0696136	0.0211277	human
HSCtoMEP	19	2.85967	2.82411	0.0296197	0.313681	0.0661747	0.0230704	human
HSCtoMEP	20	2.88438	2.84891	0.0459325	0.271288	0.070707	0.0187205	human
HSCtoMEP	21	2.85566	2.77231	0.0270796	0.276663	0.0713345	0.0196297	human
HSCtoMEP	22	2.85863	2.77764	0.0449002	0.304305	0.0759747	0.0145765	human
HSCtoMEP	23	2.90288	2.8022	0.0384469	0.309905	0.0697877	0.0242857	human
HSCtoMEP	24	2.85798	2.71918	0.0340331	0.312742	0.0849354	0.0204623	human
HSCtoMEP	25	2.88194	2.75908	0.0400776	0.309974	0.0745287	0.0228672	human
HSCtoGMP	1	2.84906	2.59682	0.0482151	0.318581	0.097501	0.0197087	human
HSCtoGMP	2	2.84906	2.59009	0.033875	0.318581	0.097451	0.0268014	human
HSCtoGMP	3	2.84906	2.57506	0.0243725	0.318581	0.0949137	0.0306029	human
HSCtoGMP	4	3.28621	3.12375	0.0841186	0.254915	0.0668855	0.0329461	human
HSCtoGMP	5	3.32885	3.18033	0.104642	0.223102	0.0578161	0.0184389	human
HSCtoGMP	6	3.33606	3.04217	0.0687653	0.259978	0.0589085	0.0182614	human
HSCtoGMP	7	3.27828	2.99329	0.0668619	0.260051	0.0685103	0.0197491	human
HSCtoGMP	8	3.36028	3.21902	0.117336	0.27476	0.0629076	0.0343649	human
HSCtoGMP	9	3.31186	3.22864	0.0971097	0.225691	0.0678302	0.0261685	human
HSCtoGMP	10	3.22932	3.04657	0.0583898	0.22764	0.0569171	0.0265671	human
HSCtoGMP	11	3.21391	3.00092	0.0565964	0.279344	0.0687811	0.0280826	human
HSCtoGMP	12	3.22034	2.97695	0.0661987	0.277569	0.0774212	0.0296741	human
HSCtoGMP	13	3.04967	2.74978	0.0428595	0.311867	0.0791111	0.019895	human
HSCtoGMP	14	3.04967	2.74566	0.0400188	0.311867	0.0767584	0.0176388	human
HSCtoGMP	15	3.04967	2.7607	0.0423647	0.311867	0.0825073	0.0232956	human
HSCtoGMP	16	3.04967	2.75223	0.0485565	0.311867	0.0778747	0.0263837	human
HSCtoGMP	17	2.84906	2.59058	0.0357509	0.318581	0.0937396	0.0267356	human
HSCtoGMP	18	2.84906	2.59914	0.0392293	0.318581	0.0993542	0.0226996	human
HSCtoGMP	19	2.84906	2.59136	0.0253074	0.318581	0.0967051	0.0234564	human
HSCtoGMP	20	2.84906	2.58538	0.0346589	0.318581	0.0900539	0.0241475	human
HSCtoGMP	21	2.84906	2.58987	0.033747	0.318581	0.0945977	0.0185544	human
HSCtoGMP	22	2.84906	2.58349	0.0340426	0.318581	0.0940908	0.0227667	human
HSCtoGMP	23	2.69531	2.66671	0.0585919	0.237596	0.0971298	0.032126	human
HSCtoGMP	24	2.5961	2.68008	0.0360053	0.2818	0.0888826	0.0303051	human
HSCtoGMP	25	2.95148	3.01247	0.0739048	0.166828	0.0685891	0.0316559	human
HSCtoProB	1	3.95554	3.78003	0.229432	0.0871346	0.0395689	0.0259614	human
HSCtoProB	2	3.77839	3.73852	0.189211	0.0732269	0.0581745	0.0287171	human
HSCtoProB	3	4.03556	3.96102	0.242324	0.089169	0.0570347	0.0323481	human
HSCtoProB	4	3.35974	3.23741	0.240435	0.097619	0.0870243	0.0523234	human
HSCtoProB	5	2.98684	3.37567	0.412462	0.0707672	0.103407	0.0829924	human
HSCtoProB	6	3.06443	3.20485	0.269768	0.061678	0.100171	0.0541274	human
HSCtoProB	7	3.01511	3.26433	0.182323	0.061678	0.0920708	0.0552615	human
HSCtoProB	8	3.0574	3.20321	0.313778	0.127381	0.0844842	0.0495032	human
HSCtoProB	9	2.67133	3.34095	0.238353	0.0914286	0.0813001	0.0720373	human
HSCtoProB	10	2.73764	3.13219	0.238459	0.102646	0.0937573	0.0659079	human
HSCtoProB	11	2.74905	3.29013	0.209538	0.108684	0.0691333	0.053159	human
HSCtoProB	12	3.32804	3.11675	0.221831	0.114286	0.0836914	0.0474548	human
HSCtoProB	13	3.17678	3.18281	0.299627	0.242971	0.0957207	0.0557498	human
HSCtoProB	14	3.09223	3.35234	0.345705	0.227814	0.10469	0.0374508	human
HSCtoProB	15	3.225	3.46775	0.292361	0.229663	0.0538613	0.0453945	human
HSCtoProB	16	3.26112	3.44061	0.189771	0.2597	0.0537509	0.0300416	human
HSCtoProB	17	3.7596	3.27374	0.269537	0.37417	0.0744411	0.0444435	human
HSCtoProB	18	4.63428	3.27707	0.196547	0.377698	0.0590074	0.039372	human
HSCtoProB	19	4.38825	3.39011	0.151568	0.309252	0.0705261	0.0502373	human
HSCtoProB	20	4.52163	3.5038	0.206978	0.292054	0.0633603	0.0397777	human
HSCtoProB	21	4.59204	3.56554	0.175704	0.363199	0.0747696	0.0423433	human
HSCtoProB	22	5.50707	3.55074	0.214524	0.267352	0.0621957	0.0376474	human
HSCtoProB	23	4.32657	3.40521	0.154261	0.307337	0.0741384	0.0365346	human
HSCtoProB	24	4.17198	3.29198	0.158793	0.366973	0.0632161	0.0321711	human
HSCtoProB	25	3.77798	3.27452	0.128936	0.329001	0.0708674	0.0297167	human

## Sheet: network_degree_conserved
Conserved network degrees in the identified core subnetworks expressed in three differentiation branches in Figure 6
GeneName	GeneDegree	branch
MYB	49	GMP
CSF1R	38	GMP
ALAS1	35	GMP
EGFL7	35	GMP
KIT	30	GMP
LYL1	30	GMP
PBX1	30	GMP
LMO2	29	GMP
NFE2	29	GMP
ERG	28	GMP
GATA2	28	GMP
MEIS1	27	GMP
DIAPH3	24	GMP
SH2B3	24	GMP
TAL1	24	GMP
UBC	24	GMP
HOXA9	23	GMP
GATA3	22	GMP
MECOM	22	GMP
POU2F2	22	GMP
BLVRB	21	GMP
GYPC	21	GMP
IRF4	21	GMP
ETS1	19	GMP
RUNX1	19	GMP
BATF3	18	GMP
BPTF	18	GMP
GFI1	18	GMP
HHEX	18	GMP
HS6ST1	18	GMP
RUNX3	18	GMP
DNMT3A	17	GMP
ETV6	17	GMP
GFI1B	17	GMP
HOXA5	17	GMP
SMARCC1	16	GMP
MPL	15	GMP
PROCR	15	GMP
BLNK	14	GMP
IKZF1	14	GMP
DPEP2	13	GMP
MAP3K1	13	GMP
PLXNB2	13	GMP
BCL11B	12	GMP
EIF2B1	12	GMP
HOXB4	12	GMP
LDB1	12	GMP
SERPINF2	12	GMP
TET2	12	GMP
CD19	11	GMP
CD22	11	GMP
CD5	11	GMP
ITGA2B	11	GMP
MS4A6A	11	GMP
EFR3B	10	GMP
FLI1	10	GMP
GFAP	10	GMP
POLR2A	9	GMP
PRDM16	9	GMP
XCL1	9	GMP
BLK	8	GMP
MPP1	8	GMP
PERP	8	GMP
SSPN	8	GMP
ALAS2	7	GMP
EPB41	7	GMP
ORC1	7	GMP
SIT1	7	GMP
SLAMF8	7	GMP
STAM	7	GMP
POU2AF1	6	GMP
VWF	6	GMP
AVPI1	5	GMP
ETS2	5	GMP
KIAA0226	5	GMP
KIF14	5	GMP
MTMR3	5	GMP
CCNF	4	GMP
SPSB1	4	GMP
MITF	3	GMP
MKRN1	3	GMP
SPINT1	3	GMP
CD79B	1	GMP
ORC1	37	MEP
ALAS2	36	MEP
KIF14	35	MEP
LDB1	35	MEP
LMO2	35	MEP
LYL1	34	MEP
GATA1	33	MEP
GATA2	32	MEP
GFI1B	32	MEP
GYPC	32	MEP
ETV6	31	MEP
GCK	31	MEP
TSPO2	31	MEP
PACSIN3	29	MEP
FLI1	28	MEP
FBXO7	27	MEP
ACP1	26	MEP
MEIS1	26	MEP
SLC6A20	26	MEP
BLVRB	25	MEP
COMP	24	MEP
EPB41	24	MEP
ERG	24	MEP
FAM46C	23	MEP
ITGA2B	23	MEP
MAP3K1	23	MEP
PBX1	23	MEP
POU2F2	23	MEP
EGFL7	22	MEP
ALAD	21	MEP
LEF1	20	MEP
RUNX1	20	MEP
GCLM	19	MEP
MYB	19	MEP
TAL1	19	MEP
SERPINB4	18	MEP
DIAPH3	17	MEP
HHEX	16	MEP
ASB6	15	MEP
HS6ST1	15	MEP
MPL	14	MEP
SMARCC1	14	MEP
ETS2	13	MEP
IRF4	13	MEP
GFI1	12	MEP
HOXB4	12	MEP
SH2B3	12	MEP
KIT	11	MEP
SPTB	11	MEP
PERP	10	MEP
POLR2A	10	MEP
MITF	9	MEP
CD79B	8	MEP
KIAA0226	8	MEP
VWF	8	MEP
BPTF	7	MEP
ELL2	7	MEP
NFE2	7	MEP
SPINT1	7	MEP
USP10	6	MEP
AFF4	5	MEP
CCNF	5	MEP
TET2	4	MEP
GDAP1	2	MEP
BLNK	21	LMPP
LYL1	12	LMPP
GATA2	11	LMPP
PBX1	11	LMPP
UBC	11	LMPP
IKZF1	10	LMPP
EGFL7	9	LMPP
CD3E	7	LMPP
ERG	7	LMPP
GYPC	7	LMPP
MEIS1	7	LMPP
NFE2	7	LMPP
TAL1	7	LMPP
CD79B	6	LMPP
ETS1	6	LMPP
HHEX	6	LMPP
ACP1	5	LMPP
CD19	5	LMPP
CD22	5	LMPP
MECOM	5	LMPP
POU2AF1	5	LMPP
SERPINF2	5	LMPP
SIT1	5	LMPP
GFI1B	4	LMPP
MS4A1	4	LMPP
HOXA5	3	LMPP
IRF4	3	LMPP
LMO2	3	LMPP
MYB	3	LMPP
POLR2A	3	LMPP
TNFRSF13B	3	LMPP
TRAT1	3	LMPP
DNMT3A	2	LMPP
GATA3	2	LMPP
HOXA9	2	LMPP
MYO1C	2	LMPP
RUNX3	2	LMPP
SMARCC1	2	LMPP
KIT	1	LMPP
MAP3K1	1	LMPP
POU2F2	1	LMPP

## Sheet: smallworldfeatures
Conserved network degrees in the identified core subnetworks expressed in three differentiation branches in Figure 6
	HSC to GMP	HSC to MEP	HSC to LMPP
Network Length	1.97849	1.75645	2.61219
Clustering Coefficient	0.378849	0.509869	0.365848
Average of Network Length of random network of same size	1.86216	1.69273	2.32202
Average of Clustering Coefficient of random network of same size	0.187256	0.309086	0.133595
SD of Network Length of random network of same size	0.00387054	0.00102386	0.0304648
SD of Clustering Coefficient of random network of same size	0.00662149	0.00644122	0.0272748
