# Supplementary material for: Time-Varying Gene Expression Network Analysis Reveals Conserved Transition States in Hematopoietic Differentiation between Human and Mouse
Source: Genes (Basel). 2022 Oct 18;13(10):1890. doi: 10.3390/genes13101890 (PMC9601530; doi:10.3390/genes13101890)
Supplement: Supplementary file 1 [file genes-13-01890-s001.zip › suppFile S1.txt]

MOUSE	HUMAN	SOURCE
Bptf	BPTF	human
Cdkn2a	CDKN2A	human
Csf1r	CSF1R	human
Dnmt3a	DNMT3A	human
Egfl7	EGFL7	human
Eif2b1	EIF2B1	human
Erg	ERG	human
Ets1	ETS1	human
Ets2	ETS2	human
Etv6	ETV6	human
Fli1	FLI1	human
Gata1	GATA1	human
Gata2	GATA2	human
Gata3	GATA3	human
Gfi1	GFI1	human
Gfi1b	GFI1B	human
Hhex	HHEX	human
Hoxa5	HOXA5	human
Hoxa9	HOXA9	human
Hoxb4	HOXB4	human
Ikzf1	IKZF1	human
Itga2b	ITGA2B	human
Kit	KIT	human
Ldb1	LDB1	human
Lmo2	LMO2	human
Lyl1	LYL1	human
Mecom	MECOM	human
Meis1	MEIS1	human
Mitf	MITF	human
Mpl	MPL	human
Myb	MYB	human
Nfe2	NFE2	human
Pbx1	PBX1	human
Polr2a	POLR2A	human
Prdm16	PRDM16	human
Procr	PROCR	human
Runx1	RUNX1	human
Sh2b3	SH2B3	human
Smarcc1	SMARCC1	human
Tal1	TAL1	human
Tcf7	TCF7	human
Tet2	TET2	human
Ubc	UBC	human
Vwf	VWF	human
Lrig1	CD3D	LMPH
Zfp365	CD5	LMPH
Zfp365	CD5	LMPH
Lef1	LRIG1	LMPH
Cd6	LEF1	LMPH
Zfp365	CD5	LMPH
Zfp365	CD5	LMPH
Cd3e	TRAT1	LMPH
Sit1	CD6	LMPH
Lef1	LRIG1	LMPH
Bcl11b	ALS2CL	LMPH
Als2cl	SIT1	LMPH
Trat1	CD3E	LMPH
Cd5	ZNF365	LMPH
Lef1	LRIG1	LMPH
Sit1	CD6	LMPH
Bcl11b	ALS2CL	LMPH
Trat1	CD3E	LMPH
Bcl11b	ALS2CL	LMPH
Bcl11b	ALS2CL	LMPH
Cd3e	TRAT1	LMPH
Cd6	LEF1	LMPH
Cd3d	BCL11B	LMPH
Cd6	LEF1	LMPH
Cd6	LEF1	LMPH
Ypel1	XCL1	LMPH
Ncald	NCALD	LMPH
Runx3	RUNX3	LMPH
Sox15	YPEL1	LMPH
Sox15	YPEL1	LMPH
Ypel1	XCL1	LMPH
Xcl1	SOX15	LMPH
Ypel1	XCL1	LMPH
Ncald	NCALD	LMPH
Runx3	RUNX3	LMPH
Sox15	YPEL1	LMPH
Sox15	YPEL1	LMPH
Ypel1	XCL1	LMPH
Xcl1	SOX15	LMPH
Usp10	POU2AF1	LMPH
Usp10	POU2AF1	LMPH
Dennd5b	KIAA0226	LMPH
Myo1c	BLK	LMPH
Cd22	SFN	LMPH
Dennd5b	KIAA0226	LMPH
Usp10	POU2AF1	LMPH
Myo1c	BLK	LMPH
Map3k1	IRF4	LMPH
Map3k1	IRF4	LMPH
Ms4a1	USP10	LMPH
Sspn	BLNK	LMPH
Sfn	MS4A1	LMPH
Blk	DENND5B	LMPH
Cd22	SFN	LMPH
Blnk	MYO1C	LMPH
Blnk	MYO1C	LMPH
Cd19	CD22	LMPH
Cd19	CD22	LMPH
Tnfrsf13b	POU2F2	LMPH
Cd22	SFN	LMPH
Pou2f2	MAP3K1	LMPH
1700021K19Rik	TNFRSF13B	LMPH
Irf4	CD79B	LMPH
Pou2af1	SSPN	LMPH
Blk	DENND5B	LMPH
Cd79b	CD19	LMPH
Tnfrsf13b	POU2F2	LMPH
Cd79b	CD19	LMPH
Dpep2	MS4A6A	GMP
Dpep2	MS4A6A	GMP
Dpep2	MS4A6A	GMP
Ms4a6d	PLXNB2	GMP
Plxnb2	DPEP2	GMP
Ms4a6d	PLXNB2	GMP
Perp	PERP	GMP
Tox3	TOX3	GMP
Ccr3	CCR3	GMP
Alas1	ALAS1	GMP
Cd207	FLRT3	GMP
Flrt3	CD207	GMP
Spint1	BATF3	GMP
Cd207	FLRT3	GMP
Flrt3	CD207	GMP
Slamf8	SPSB1	GMP
Batf3	AVPI1	GMP
Avpi1	SLAMF8	GMP
Spint1	BATF3	GMP
Batf3	AVPI1	GMP
Avpi1	SLAMF8	GMP
Spsb1	SPINT1	GMP
Csrp3	COMP	GMP
Csrp3	COMP	GMP
Csrp3	COMP	GMP
Comp	AFF4	GMP
Htr1b	C19orf80	GMP
Epha5	HOXD13	GMP
Arsj	HTR1B	GMP
Epha5	HOXD13	GMP
Hoxd13	KCNB2	GMP
Epha5	HOXD13	GMP
Astn1	EPHA5	GMP
Asb4	ARSJ	GMP
Epha5	HOXD13	GMP
Arsj	HTR1B	GMP
Rsph6a	ASB4	GMP
Epha5	HOXD13	GMP
Kcnb2	RSPH6A	GMP
Efr3b	ASTN1	GMP
Asb4	ARSJ	GMP
Gm6484	CSRP3	GMP
Astn1	EPHA5	GMP
Comp	AFF4	GMP
Aff4	EFR3B	GMP
Ermap	KIF14	MEP
Tspo2	PACSIN3	MEP
Kel	SERPINB4	MEP
Ank1	ACTA1	MEP
Rhag	EPB41	MEP
Ank1	ACTA1	MEP
Rhag	EPB41	MEP
Ank1	ACTA1	MEP
Sphk1	FAM46C	MEP
Dmtn	EPHX3	MEP
Rhag	EPB41	MEP
Dmtn	EPHX3	MEP
Klf1	SLC6A20	MEP
Sptb	NRL	MEP
Spta1	FBXO7	MEP
Car1	GCK	MEP
Hbq1b	SPTB	MEP
Agtr1a	MPP1	MEP
Epor	ALAD	MEP
Tmod1	BLVRB	MEP
Car2	HS6ST1	MEP
Fn3k	C6orf106	MEP
March8	ASB6	MEP
Ctse	SNX15	MEP
Add2	CSPG4	MEP
Ptpn14	ACP1	MEP
Car2	HS6ST1	MEP
Rab3il1	MTMR3	MEP
Nrip3	RNF186	MEP
Slc43a1	GYPC	MEP
Icam4	ALAS2	MEP
Alas2	WDR26	MEP
Tmcc2	FAM214B	MEP
Rab3il1	MTMR3	MEP
Map4k5	MKRN1	MEP
Hebp1	MARCH2	MEP
Hbq1b	SPTB	MEP
Ube2c	DIAPH3	MEP
Mkrn1	GFAP	MEP
Slc22a4	SERPINF2	MEP
Slc2a4	TMCC2	MEP
Sec14l2	GCLM	MEP
Atp1b2	TSPO2	MEP
Runx1t1	FBXO34	MEP
8430419L09Rik	GDAP1	MEP
Blvrb	ORC1	MEP
Reln	GOLPH3L	MEP
Snx15	STAM	MEP
Slc4a1	ELL2	MEP
Diap3	CCNF	MEP
