# Supplementary material for: Time-Varying Gene Expression Network Analysis Reveals Conserved Transition States in Hematopoietic Differentiation between Human and Mouse
Source: Genes (Basel). 2022 Oct 18;13(10):1890. doi: 10.3390/genes13101890 (PMC9601530; doi:10.3390/genes13101890)
Supplement: Supplementary file 1 [file genes-13-01890-s001.zip › suppFile S2.txt]

branch	timepoint	lambda_opt	h_opt	d_opt
HSCtoGMP_human	1	0.3	0.2	1
HSCtoGMP_human	2	0.3	0.2	1
HSCtoGMP_human	3	0.3	0.2	1
HSCtoGMP_human	4	0.3	0.2	0.3
HSCtoGMP_human	5	0.3	0.2	0.3
HSCtoGMP_human	6	0.3	0.2	0.3
HSCtoGMP_human	7	0.3	0.2	0.3
HSCtoGMP_human	8	0.3	0.2	0.2
HSCtoGMP_human	9	0.25	0.2	0.2
HSCtoGMP_human	10	0.25	0.2	0.2
HSCtoGMP_human	11	0.25	0.2	0.3
HSCtoGMP_human	12	0.25	0.2	0.3
HSCtoGMP_human	13	0.25	0.2	1
HSCtoGMP_human	14	0.25	0.2	1
HSCtoGMP_human	15	0.25	0.2	1
HSCtoGMP_human	16	0.25	0.2	1
HSCtoGMP_human	17	0.3	0.2	1
HSCtoGMP_human	18	0.3	0.2	1
HSCtoGMP_human	19	0.3	0.2	1
HSCtoGMP_human	20	0.3	0.2	1
HSCtoGMP_human	21	0.3	0.2	1
HSCtoGMP_human	22	0.3	0.2	1
HSCtoGMP_human	23	0.3	0.2	0.2
HSCtoGMP_human	24	0.3	0.2	0.2
HSCtoGMP_human	25	0.3	0.2	0.1
HSCtoMEP_human	1	0.3	0.2	1
HSCtoMEP_human	2	0.3	0.2	1
HSCtoMEP_human	3	0.3	0.2	1
HSCtoMEP_human	4	0.3	0.2	1
HSCtoMEP_human	5	0.3	0.2	1
HSCtoMEP_human	6	0.3	0.2	1
HSCtoMEP_human	7	0.3	0.2	1
HSCtoMEP_human	8	0.3	0.2	1
HSCtoMEP_human	9	0.3	0.2	1
HSCtoMEP_human	10	0.3	0.2	1
HSCtoMEP_human	11	0.25	0.2	0.3
HSCtoMEP_human	12	0.25	0.2	0.3
HSCtoMEP_human	13	0.25	0.2	0.3
HSCtoMEP_human	14	0.25	0.2	0.3
HSCtoMEP_human	15	0.25	0.2	0.3
HSCtoMEP_human	16	0.25	0.2	0.3
HSCtoMEP_human	17	0.25	0.2	0.3
HSCtoMEP_human	18	0.2	0.2	0.3
HSCtoMEP_human	19	0.2	0.2	0.3
HSCtoMEP_human	20	0.2	0.2	0.3
HSCtoMEP_human	21	0.2	0.2	0.3
HSCtoMEP_human	22	0.2	0.2	0.3
HSCtoMEP_human	23	0.2	0.2	0.3
HSCtoMEP_human	24	0.25	0.2	0.3
HSCtoMEP_human	25	0.25	0.2	0.3
HSCtoLMPP_human	1	0.2	0.3	0.2
HSCtoLMPP_human	2	0.2	0.3	0.2
HSCtoLMPP_human	3	0.2	0.3	0.1
HSCtoLMPP_human	4	0.3	0.3	0.2
HSCtoLMPP_human	5	0.3	0.3	0.2
HSCtoLMPP_human	6	0.3	0.3	0.2
HSCtoLMPP_human	7	0.3	0.3	0.2
HSCtoLMPP_human	8	0.3	0.3	0.2
HSCtoLMPP_human	9	0.3	0.3	0.2
HSCtoLMPP_human	10	0.3	0.3	0.2
HSCtoLMPP_human	11	0.3	0.3	0.2
HSCtoLMPP_human	12	0.3	0.3	0.2
HSCtoLMPP_human	13	0.3	0.3	0.2
HSCtoLMPP_human	14	0.3	0.3	0.2
HSCtoLMPP_human	15	0.3	0.3	0.2
HSCtoLMPP_human	16	0.3	0.3	0.2
HSCtoLMPP_human	17	0.3	0.3	0.2
HSCtoLMPP_human	18	0.3	0.3	0.2
HSCtoLMPP_human	19	0.3	0.3	0.2
HSCtoLMPP_human	20	0.3	0.3	0.2
HSCtoLMPP_human	21	0.3	0.3	0.2
HSCtoLMPP_human	22	0.3	0.3	0.05
HSCtoLMPP_human	23	0.3	0.3	0.2
HSCtoLMPP_human	24	0.3	0.3	0.2
HSCtoLMPP_human	25	0.3	0.3	0.2
HSCtoGMP_mouse	1	0.3	0.15	0.3
HSCtoGMP_mouse	2	0.3	0.15	1
HSCtoGMP_mouse	3	0.3	0.15	1
HSCtoGMP_mouse	4	0.3	0.15	1
HSCtoGMP_mouse	5	0.3	0.15	1
HSCtoGMP_mouse	6	0.3	0.15	1
HSCtoGMP_mouse	7	0.3	0.15	1
HSCtoGMP_mouse	8	0.3	0.15	1
HSCtoGMP_mouse	9	0.3	0.15	1
HSCtoGMP_mouse	10	0.3	0.15	1
HSCtoGMP_mouse	11	0.3	0.15	1
HSCtoGMP_mouse	12	0.3	0.15	1
HSCtoGMP_mouse	13	0.3	0.15	1
HSCtoGMP_mouse	14	0.3	0.15	1
HSCtoGMP_mouse	15	0.3	0.15	1
HSCtoGMP_mouse	16	0.3	0.15	1
HSCtoGMP_mouse	17	0.15	0.15	0.2
HSCtoGMP_mouse	18	0.15	0.15	0.2
HSCtoGMP_mouse	19	0.2	0.15	0.2
HSCtoGMP_mouse	20	0.25	0.15	0.2
HSCtoGMP_mouse	21	0.3	0.15	1
HSCtoGMP_mouse	22	0.3	0.15	1
HSCtoGMP_mouse	23	0.2	0.15	0.2
HSCtoGMP_mouse	24	0.2	0.15	0.3
HSCtoGMP_mouse	25	0.25	0.15	0.3
HSCtoMEP_mouse	1	0.2	0.15	0.2
HSCtoMEP_mouse	2	0.2	0.15	0.2
HSCtoMEP_mouse	3	0.2	0.15	0.2
HSCtoMEP_mouse	4	0.2	0.15	0.1
HSCtoMEP_mouse	5	0.2	0.15	0.1
HSCtoMEP_mouse	6	0.2	0.15	0.1
HSCtoMEP_mouse	7	0.2	0.15	0.1
HSCtoMEP_mouse	8	0.2	0.15	0.2
HSCtoMEP_mouse	9	0.2	0.15	0.2
HSCtoMEP_mouse	10	0.2	0.15	0.2
HSCtoMEP_mouse	11	0.2	0.15	0.2
HSCtoMEP_mouse	12	0.2	0.15	0.2
HSCtoMEP_mouse	13	0.2	0.15	0.2
HSCtoMEP_mouse	14	0.2	0.15	0.2
HSCtoMEP_mouse	15	0.2	0.15	0.3
HSCtoMEP_mouse	16	0.2	0.15	0.3
HSCtoMEP_mouse	17	0.2	0.15	0.3
HSCtoMEP_mouse	18	0.2	0.15	0.3
HSCtoMEP_mouse	19	0.2	0.15	0.2
HSCtoMEP_mouse	20	0.2	0.15	0.2
HSCtoMEP_mouse	21	0.2	0.15	0.2
HSCtoMEP_mouse	22	0.2	0.15	0.2
HSCtoMEP_mouse	23	0.3	0.15	0.1
HSCtoMEP_mouse	24	0.3	0.15	0.2
HSCtoMEP_mouse	25	0.2	0.15	0.2
HSCtoLMPP_mouse	1	0.25	0.2	1
HSCtoLMPP_mouse	2	0.25	0.2	1
HSCtoLMPP_mouse	3	0.25	0.2	1
HSCtoLMPP_mouse	4	0.25	0.2	1
HSCtoLMPP_mouse	5	0.25	0.2	1
HSCtoLMPP_mouse	6	0.25	0.2	1
HSCtoLMPP_mouse	7	0.25	0.2	1
HSCtoLMPP_mouse	8	0.3	0.2	1
HSCtoLMPP_mouse	9	0.3	0.2	1
HSCtoLMPP_mouse	10	0.3	0.2	1
HSCtoLMPP_mouse	11	0.3	0.2	1
HSCtoLMPP_mouse	12	0.25	0.2	1
HSCtoLMPP_mouse	13	0.25	0.2	1
HSCtoLMPP_mouse	14	0.25	0.2	1
HSCtoLMPP_mouse	15	0.25	0.2	1
HSCtoLMPP_mouse	16	0.25	0.2	1
HSCtoLMPP_mouse	17	0.25	0.2	1
HSCtoLMPP_mouse	18	0.25	0.2	1
HSCtoLMPP_mouse	19	0.25	0.2	1
HSCtoLMPP_mouse	20	0.25	0.2	1
HSCtoLMPP_mouse	21	0.25	0.2	1
HSCtoLMPP_mouse	22	0.25	0.2	1
HSCtoLMPP_mouse	23	0.25	0.2	1
HSCtoLMPP_mouse	24	0.2	0.2	1
HSCtoLMPP_mouse	25	0.2	0.2	1
