# Supplementary material for: Time-Varying Gene Expression Network Analysis Reveals Conserved Transition States in Hematopoietic Differentiation between Human and Mouse
Source: Genes (Basel). 2022 Oct 18;13(10):1890. doi: 10.3390/genes13101890 (PMC9601530; doi:10.3390/genes13101890)
Supplement: Supplementary file 1 [file genes-13-01890-s001.zip › SuppFile S3.txt]

branch	timepoint	KS.stat
HSCtoGMP_mouse	1	0.09128647
HSCtoGMP_mouse	2	0.062345
HSCtoGMP_mouse	3	0.062345
HSCtoGMP_mouse	4	0.062345
HSCtoGMP_mouse	5	0.062345
HSCtoGMP_mouse	6	0.062345
HSCtoGMP_mouse	7	0.062345
HSCtoGMP_mouse	8	0.062345
HSCtoGMP_mouse	9	0.062345
HSCtoGMP_mouse	10	0.062345
HSCtoGMP_mouse	11	0.062345
HSCtoGMP_mouse	12	0.062345
HSCtoGMP_mouse	13	0.062345
HSCtoGMP_mouse	14	0.062345
HSCtoGMP_mouse	15	0.062345
HSCtoGMP_mouse	16	0.062345
HSCtoGMP_mouse	17	0.07214726
HSCtoGMP_mouse	18	0.1065549
HSCtoGMP_mouse	19	0.07649227
HSCtoGMP_mouse	20	0.05666876
HSCtoGMP_mouse	21	0.062345
HSCtoGMP_mouse	22	0.062345
HSCtoGMP_mouse	23	0.09962465
HSCtoGMP_mouse	24	0.09912923
HSCtoGMP_mouse	25	0.07988705
HSCtoMEP_mouse	1	0.06081822
HSCtoMEP_mouse	2	0.08427096
HSCtoMEP_mouse	3	0.07965031
HSCtoMEP_mouse	4	0.06568764
HSCtoMEP_mouse	5	0.07392106
HSCtoMEP_mouse	6	0.08888529
HSCtoMEP_mouse	7	0.06934587
HSCtoMEP_mouse	8	0.06989814
HSCtoMEP_mouse	9	0.09417666
HSCtoMEP_mouse	10	0.07699191
HSCtoMEP_mouse	11	0.08395643
HSCtoMEP_mouse	12	0.05751108
HSCtoMEP_mouse	13	0.0918531
HSCtoMEP_mouse	14	0.05854846
HSCtoMEP_mouse	15	0.07431364
HSCtoMEP_mouse	16	0.07238551
HSCtoMEP_mouse	17	0.111207
HSCtoMEP_mouse	18	0.08605911
HSCtoMEP_mouse	19	0.1079218
HSCtoMEP_mouse	20	0.08191179
HSCtoMEP_mouse	21	0.07831552
HSCtoMEP_mouse	22	0.075208
HSCtoMEP_mouse	23	0.04585704
HSCtoMEP_mouse	24	0.1019021
HSCtoMEP_mouse	25	0.07386542
HSCtoLMPP_mouse	1	0.1041559
HSCtoLMPP_mouse	2	0.1041559
HSCtoLMPP_mouse	3	0.1041559
HSCtoLMPP_mouse	4	0.1041559
HSCtoLMPP_mouse	5	0.1041559
HSCtoLMPP_mouse	6	0.1041559
HSCtoLMPP_mouse	7	0.1041559
HSCtoLMPP_mouse	8	0.07362993
HSCtoLMPP_mouse	9	0.07362993
HSCtoLMPP_mouse	10	0.07362993
HSCtoLMPP_mouse	11	0.07362993
HSCtoLMPP_mouse	12	0.1041559
HSCtoLMPP_mouse	13	0.1041559
HSCtoLMPP_mouse	14	0.1041559
HSCtoLMPP_mouse	15	0.1041559
HSCtoLMPP_mouse	16	0.1041559
HSCtoLMPP_mouse	17	0.1041559
HSCtoLMPP_mouse	18	0.1041559
HSCtoLMPP_mouse	19	0.1041559
HSCtoLMPP_mouse	20	0.1041559
HSCtoLMPP_mouse	21	0.1041559
HSCtoLMPP_mouse	22	0.1041559
HSCtoLMPP_mouse	23	0.1041559
HSCtoLMPP_mouse	24	0.08179501
HSCtoLMPP_mouse	25	0.08179501
HSCtoGMP_human	1	0.08854093
HSCtoGMP_human	2	0.08854093
HSCtoGMP_human	3	0.08854093
HSCtoGMP_human	4	0.09854351
HSCtoGMP_human	5	0.09383763
HSCtoGMP_human	6	0.1050305
HSCtoGMP_human	7	0.06751966
HSCtoGMP_human	8	0.07298371
HSCtoGMP_human	9	0.0666101
HSCtoGMP_human	10	0.07592288
HSCtoGMP_human	11	0.08691978
HSCtoGMP_human	12	0.08702235
HSCtoGMP_human	13	0.1237638
HSCtoGMP_human	14	0.1237638
HSCtoGMP_human	15	0.1237638
HSCtoGMP_human	16	0.1237638
HSCtoGMP_human	17	0.08854093
HSCtoGMP_human	18	0.08854093
HSCtoGMP_human	19	0.08854093
HSCtoGMP_human	20	0.08854093
HSCtoGMP_human	21	0.08854093
HSCtoGMP_human	22	0.08854093
HSCtoGMP_human	23	0.06132801
HSCtoGMP_human	24	0.06026631
HSCtoGMP_human	25	0.08701027
HSCtoMEP_human	1	0.11369
HSCtoMEP_human	2	0.11369
HSCtoMEP_human	3	0.11369
HSCtoMEP_human	4	0.11369
HSCtoMEP_human	5	0.11369
HSCtoMEP_human	6	0.11369
HSCtoMEP_human	7	0.11369
HSCtoMEP_human	8	0.11369
HSCtoMEP_human	9	0.11369
HSCtoMEP_human	10	0.11369
HSCtoMEP_human	11	0.1292437
HSCtoMEP_human	12	0.1242367
HSCtoMEP_human	13	0.07998399
HSCtoMEP_human	14	0.06478724
HSCtoMEP_human	15	0.08240591
HSCtoMEP_human	16	0.1008197
HSCtoMEP_human	17	0.07529181
HSCtoMEP_human	18	0.09418499
HSCtoMEP_human	19	0.07797679
HSCtoMEP_human	20	0.06960823
HSCtoMEP_human	21	0.0669761
HSCtoMEP_human	22	0.1067608
HSCtoMEP_human	23	0.08878637
HSCtoMEP_human	24	0.07150412
HSCtoMEP_human	25	0.05540519
HSCtoProB_human	1	0.07341983
HSCtoProB_human	2	0.04400598
HSCtoProB_human	3	0.06034994
HSCtoProB_human	4	0.05314656
HSCtoProB_human	5	0.05210375
HSCtoProB_human	6	0.06882845
HSCtoProB_human	7	0.07388139
HSCtoProB_human	8	0.05615459
HSCtoProB_human	9	0.06735715
HSCtoProB_human	10	0.05100687
HSCtoProB_human	11	0.04221065
HSCtoProB_human	12	0.04606652
HSCtoProB_human	13	0.06938682
HSCtoProB_human	14	0.06786294
HSCtoProB_human	15	0.08076745
HSCtoProB_human	16	0.0777039
HSCtoProB_human	17	0.05485834
HSCtoProB_human	18	0.05485834
HSCtoProB_human	19	0.07981079
HSCtoProB_human	20	0.07224462
HSCtoProB_human	21	0.05260562
HSCtoProB_human	22	0.09208921
HSCtoProB_human	23	0.04718127
HSCtoProB_human	24	0.05626611
HSCtoProB_human	25	0.08409446
